# Supplementary material for: Disparities in Lung Cancer: miRNA Isoform Characterization in Lung Adenocarcinoma
Source: Preprints.org preprint supplement (doi:10.20944/preprints202112.0501.v1), 2021-12-31
Supplement: Supplementary file 1 [file supplementary]

Archive with 22 entries (22 files):
- Figure S1.pdf
- __MACOSX/._Figure S1.pdf
- Figure S2.pdf
- __MACOSX/._Figure S2.pdf
- Figure S3.pdf
- __MACOSX/._Figure S3.pdf
- Figure S4.pdf
- __MACOSX/._Figure S4.pdf
- Figure S5.pdf
- __MACOSX/._Figure S5.pdf
- Figure S6.pdf
- __MACOSX/._Figure S6.pdf
- Table S1.xlsx
- __MACOSX/._Table S1.xlsx
- Table S2.xlsx
- __MACOSX/._Table S2.xlsx
- Table S3.xlsx
- __MACOSX/._Table S3.xlsx
- Table S4.xlsx
- __MACOSX/._Table S4.xlsx
- Table S5.xlsx
- __MACOSX/._Table S5.xlsx
