# Supplementary material for: Disparities in Lung Cancer: miRNA Isoform Characterization in Lung Adenocarcinoma
Source: Preprints.org preprint supplement (doi:10.20944/preprints202112.0501.v1), 2021-12-31
Supplement: Supplementary file 1 [file supplementary]

## Sheet: DE_Q1_vs_Q3_BAA
Entity_ID	Gene_name	logFC_mn	LinearFC_mn	PValue	FDR	q3_mn	q3_sd	q1_mn	q1_sd
ENSG00000110680	CALCA	7.99274	254.714	0.000523297	0.0576882	2.08069	5.68297	529.981	1493.24
ENSG00000096088	PGC	6.25619	76.4365	0.000998683	0.0611243	47.3607	67.9128	3620.09	12416
ENSG00000171560	FGA	4.66787	25.4196	0.00302693	0.0863565	30.8877	48.669	785.155	2347.75
ENSG00000204936	CD177	4.48236	22.3524	0.000626618	0.0576882	2.97782	5.21916	66.5615	108.316
ENSG00000211942	IGHV3-13	3.8982	14.9099	0.00111165	0.0631256	3.45374	4.40352	51.4949	112.031
ENSG00000164825	DEFB1	3.72348	13.2092	0.00105259	0.0625111	0.940991	1.58446	12.4298	19.7379
ENSG00000248144	ADH1C	3.67633	12.7846	0.00164665	0.0695949	4.09215	5.96775	52.3165	123.493
ENSG00000275896	PRSS2	3.55507	11.7539	0.000935427	0.0609687	1.89732	2.81171	22.3009	31.6126
ENSG00000151632	AKR1C2	3.51751	11.4519	0.017323	0.157285	81.5323	181.556	933.696	2294.19
ENSG00000130600	H19	3.51373	11.4219	0.000301561	0.0575437	7.28637	6.66402	83.2244	149.734
ENSG00000251039	IGKV2D-40	3.504	11.3451	0.00164677	0.0695949	1.38727	1.73317	15.7388	28.6658
ENSG00000095713	CRTAC1	3.42569	10.7457	0.00432504	0.0966284	13.8924	13.9524	149.283	470.106
ENSG00000211951	IGHV2-26	3.23226	9.39741	0.000626686	0.0576882	4.45363	5.44965	41.8526	59.6683
ENSG00000100918	REC8	3.20275	9.2071	5.95125e-05	0.0441797	10.4457	7.698	96.1746	242.613
ENSG00000064655	EYA2	2.95279	7.74245	0.000786951	0.05987	5.70985	8.06842	44.2082	59.6563
ENSG00000244116	IGKV2-28	2.92115	7.57448	0.0047454	0.0988129	0.78719	1.0997	5.96255	11.3161
ENSG00000167476	JSRP1	2.91748	7.55528	0.00368673	0.0920892	4.29093	6.39794	32.4192	89.119
ENSG00000198183	BPIFA1	2.90714	7.5013	0.0396048	0.224222	35.5675	80.4382	266.802	452.359
ENSG00000148346	LCN2	2.8653	7.28685	0.00482816	0.0993649	109.299	101.058	796.445	2338.12
ENSG00000163993	S100P	2.82555	7.08882	0.02773	0.190223	41.7082	79.2389	295.662	727.762
ENSG00000243955	GSTA1	2.81191	7.02216	0.013347	0.141754	6.60046	9.56817	46.3495	86.7091
ENSG00000012223	LTF	2.81145	7.01987	0.019367	0.163596	62.746	80.028	440.469	1329.32
ENSG00000263639	MSMB	2.79829	6.95615	0.0527895	0.255994	15.3745	50.2433	106.947	265.331
ENSG00000186474	KLK12	2.78988	6.91573	0.0688059	0.290146	13.087	36.6648	90.506	191.764
ENSG00000276171		2.74302	6.69472	0.00425674	0.0957035	0.411341	0.353674	2.75381	7.3277
ENSG00000211892	IGHG4	2.70959	6.54134	0.00207691	0.0747696	167.022	184.191	1092.55	1311.21
ENSG00000153162	BMP6	2.70898	6.53858	0.00029868	0.0575437	4.38551	5.23853	28.675	38.4556
ENSG00000156076	WIF1	2.66863	6.35825	0.00997343	0.126714	4.79543	7.0414	30.4906	51.3663
ENSG00000164266	SPINK1	2.61038	6.10664	0.0791598	0.309805	109.866	270.932	670.915	2202.59
ENSG00000088836	SLC4A11	2.58493	5.99984	0.000894474	0.0609687	5.43169	5.22986	32.5893	46.0177
ENSG00000233622	CYP2T1P	2.53429	5.7929	0.00240627	0.0792724	2.38343	1.21249	13.807	29.5645
ENSG00000198848	CES1	2.45755	5.49285	0.00552181	0.102838	25.0871	28.8073	137.8	299.032
ENSG00000211890	IGHA2	2.40748	5.30545	0.00196568	0.0733217	191.281	166.339	1014.83	1537.27
ENSG00000108511	HOXB6	2.40525	5.29728	0.0070418	0.112289	5.15311	6.11354	27.2974	79.8003
ENSG00000211961	IGHV1-45	2.40069	5.28056	0.00964523	0.125023	1.67419	2.3469	8.84066	15.7912
ENSG00000149021	SCGB1A1	2.37231	5.17769	0.0556747	0.261946	31.3342	37.1088	162.239	307.426
ENSG00000265714		2.31763	4.98514	0.00486637	0.0999022	0.226119	0.295144	1.12723	1.2802
ENSG00000236017	ASMTL-AS1	2.30425	4.93911	0.000609914	0.0576882	2.82579	3.30539	13.9569	13.3373
ENSG00000162482	AKR7A3	2.29547	4.90913	0.00165617	0.0695949	2.88848	2.97963	14.1799	14.4622
ENSG00000185686	PRAME	2.28999	4.89054	0.0835266	0.3181	23.8421	45.0691	116.601	194.383
ENSG00000211941	IGHV3-11	2.28117	4.86073	0.00291198	0.0847385	25.6045	29.7483	124.457	145.662
ENSG00000232216	IGHV3-43	2.27853	4.85183	0.0134401	0.142158	10.7452	13.7197	52.1337	79.2716
ENSG00000211599	IGKV5-2	2.25751	4.78167	0.00887828	0.122525	1.87091	1.69171	8.94609	11.5755
ENSG00000211933	IGHV6-1	2.24509	4.74067	0.0150523	0.149114	1.28686	1.51651	6.10059	10.3043
ENSG00000049089	COL9A2	2.23524	4.7084	0.0018855	0.072481	14.4205	9.53027	67.8975	119.722
ENSG00000211662	IGLV3-21	2.21632	4.64706	0.0107095	0.129938	76.0005	110.609	353.179	388.296
ENSG00000263563	UBBP4	2.20531	4.61174	0.00381438	0.0930459	4.59071	3.13005	21.1712	61.0529
ENSG00000225698	IGHV3-72	2.20185	4.60069	0.010708	0.129938	4.48794	3.96733	20.6476	34.6378
ENSG00000243264	IGKV2D-29	2.18985	4.56259	0.00770848	0.116038	7.04256	9.59723	32.1323	55.961
ENSG00000125968	ID1	2.171	4.50335	0.000439269	0.0576882	21.468	19.2498	96.678	120.394
ENSG00000140564	FURIN	2.16644	4.48914	0.00217978	0.0756035	240.464	192.878	1079.48	2213.66
ENSG00000211640	IGLV6-57	2.15108	4.44159	0.00852086	0.12083	44.1547	49.021	196.117	274.918
ENSG00000207834		2.14055	4.40929	0.0307998	0.199727	1.1421	1.48933	5.03586	6.36416
ENSG00000211659	IGLV3-25	2.13809	4.40179	0.00333396	0.088904	47.8359	47.1674	210.564	223.627
ENSG00000211973	IGHV1-69	2.11137	4.32102	0.024223	0.178557	14.8965	23.6078	64.3679	76.7186
ENSG00000211972	IGHV3-66	2.11034	4.31792	0.00685402	0.111971	2.79709	2.65498	12.0776	14.4816
ENSG00000205502	C2CD4B	2.09107	4.26063	0.00905915	0.122656	2.92349	3.2656	12.4559	20.8443
ENSG00000113924	HGD	2.08609	4.24596	0.0113433	0.132966	6.71167	9.51793	28.4975	35.3057
ENSG00000108515	ENO3	2.07518	4.21398	0.000337036	0.0576882	5.31614	7.02034	22.4021	22.1273
ENSG00000074410	CA12	2.06163	4.17456	0.00928641	0.124012	14.282	16.2721	59.6212	94.0758
ENSG00000225783	MIAT	2.04654	4.13114	0.00607041	0.106714	16.9907	32.2823	70.1908	80.1484
ENSG00000211650	IGLV5-45	2.04123	4.11596	0.00352839	0.0898681	2.78129	2.28177	11.4477	13.6836
ENSG00000259291	ZNF710-AS1	2.023	4.06427	0.00180894	0.0723575	5.20899	4.69647	21.1707	42.0158
ENSG00000167964	RAB26	1.99793	3.99425	0.00250859	0.0802198	3.43227	3.87053	13.7094	16.934
ENSG00000125999	BPIFB1	1.98857	3.96843	0.057229	0.264974	40.1406	59.3766	159.295	343.483
ENSG00000224607	IGKV1D-27	1.94729	3.85648	0.0379458	0.219357	0.780264	1.11517	3.00907	6.85585
ENSG00000232442	MHENCR	1.94355	3.84651	0.000106652	0.0459787	2.90805	1.7431	11.1858	15.1665
ENSG00000253998	IGKV2-29	1.92993	3.81037	0.0792518	0.309977	4.03718	4.88196	15.3832	34.6428
ENSG00000152049	KCNE4	1.90016	3.73254	0.00988548	0.126355	10.0669	16.1807	37.575	57.3081
ENSG00000211654	IGLV5-37	1.89741	3.72543	0.0504243	0.250426	1.17285	2.38797	4.36938	6.96994
ENSG00000163053	SLC16A14	1.88714	3.69901	0.0277699	0.190223	20.9933	35.1275	77.6545	119.214
ENSG00000279332	AC090772.5	1.8861	3.69634	0.00150532	0.0687132	1.02927	0.721533	3.80453	4.38959
ENSG00000127586	CHTF18	1.88282	3.68794	1.07371e-06	0.0121232	11.7758	5.65931	43.4285	26.2655
ENSG00000211639	IGLV4-60	1.88016	3.68116	0.019794	0.164258	2.99153	4.00256	11.0123	12.1538
ENSG00000182054	IDH2	1.87931	3.67899	0.000692016	0.0576882	138.089	77.6121	508.029	819.905
ENSG00000111344	RASAL1	1.87584	3.67014	0.0229846	0.174293	11.9093	16.5503	43.7089	107.349
ENSG00000245750	DRAIC	1.8745	3.66674	0.0356734	0.214534	6.92069	9.41447	25.3764	31.7772
ENSG00000142102	PGGHG	1.8687	3.65203	0.00086273	0.0609687	62.0878	68.0919	226.747	150.753
ENSG00000188833	ENTPD8	1.86246	3.63628	0.00886588	0.122525	4.01028	5.27636	14.5825	12.9873
ENSG00000224585	AC103563.1	1.86206	3.63527	0.0429001	0.232681	0.336813	0.36232	1.22441	1.69356
ENSG00000267523	AC008735.2	1.85769	3.62426	0.000100083	0.0459787	1.05286	0.715083	3.81583	2.41479
ENSG00000132840	BHMT2	1.84972	3.60429	0.0414952	0.229254	6.03588	8.51277	21.7551	22.0803
ENSG00000223648	IGHV3-64	1.84524	3.59312	0.0192877	0.163398	3.15062	3.47114	11.3205	13.8094
ENSG00000211665	IGLV3-16	1.8341	3.56549	0.0209287	0.168355	0.931585	0.978839	3.32155	4.26105
ENSG00000211967	IGHV3-53	1.81636	3.5219	0.0174144	0.157746	6.11578	6.41496	21.5392	22.5415
ENSG00000261123	AC009065.6	1.80245	3.48811	0.0162601	0.153823	1.02791	1.56981	3.58547	4.40822
ENSG00000255007	LINC02489	1.80151	3.48585	0.0373024	0.217749	0.721238	0.846844	2.51413	4.5835
ENSG00000250182	EEF1A1P13	1.78689	3.45069	0.0402291	0.226107	6.81228	4.04933	23.5071	76.1712
ENSG00000265517		1.78462	3.44528	0.0142227	0.144893	0.131188	0.149457	0.451979	0.444831
ENSG00000259337	IGHV1OR15-2	1.7778	3.42902	0.0496236	0.248118	2.09065	2.86711	7.16889	12.0375
ENSG00000198719	DLL1	1.77524	3.42295	0.00592941	0.10547	5.15966	7.80432	17.6613	29.5873
ENSG00000249007	AL691482.4	1.77079	3.41241	0.00300902	0.0862684	2.36919	3.43672	8.08466	4.9315
ENSG00000211945	IGHV1-18	1.75565	3.37678	0.0275882	0.190223	69.1747	74.3469	233.588	290.986
ENSG00000211653	IGLV1-40	1.7521	3.36848	0.0220038	0.171206	88.908	123.821	299.485	300.218
ENSG00000272141	AL390719.2	1.74803	3.359	0.00476835	0.099018	2.16406	2.65564	7.26906	6.97367
ENSG00000211978	IGHV5-78	1.74756	3.35789	0.012422	0.137746	0.6466	0.555513	2.17121	2.77447
ENSG00000228109	MELTF-AS1	1.74089	3.34242	0.000376707	0.0576882	1.77462	1.04508	5.93154	5.24066
ENSG00000211895	IGHA1	1.73726	3.33401	0.0122383	0.136709	1654.06	1891.52	5514.64	6746.96
ENSG00000176788	BASP1	1.73485	3.32846	0.00331111	0.088904	56.947	50.8863	189.545	186.142
ENSG00000255026	AC136475.3	1.72943	3.31597	0.0223134	0.172233	4.0925	7.66387	13.5706	12.3271
ENSG00000211976	IGHV3-73	1.72576	3.30755	0.0439821	0.234499	12.3285	13.8322	40.7771	70.409
ENSG00000103257	SLC7A5	1.71317	3.27881	0.00208852	0.0747696	99.9098	73.9276	327.585	332.373
ENSG00000003989	SLC7A2	1.70831	3.26778	0.0258453	0.185132	45.6262	50.5699	149.096	172.69
ENSG00000144476	ACKR3	1.70692	3.26464	0.00648958	0.109318	14.3042	12.6568	46.698	59.4708
ENSG00000211685	IGLC7	1.7036	3.25713	0.113743	0.365983	5.98594	10.6492	19.497	46.3548
ENSG00000187134	AKR1C1	1.70205	3.25363	0.129745	0.388434	145.784	261.135	474.328	884.992
ENSG00000211655	IGLV1-36	1.69682	3.24186	0.0554585	0.261881	9.01923	10.2307	29.2391	43.3937
ENSG00000168010	ATG16L2	1.6575	3.1547	6.45236e-05	0.0441797	15.516	10.7926	48.9484	36.7096
ENSG00000158286	RNF207	1.64625	3.13019	0.00061761	0.0576882	10.3654	8.02265	32.4455	22.4839
ENSG00000226332	AL354836.1	1.64428	3.12592	0.00149537	0.0685281	1.60828	1.39064	5.02736	3.36871
ENSG00000120075	HOXB5	1.64348	3.12419	0.0295785	0.195921	4.76574	4.82447	14.8891	37.2093
ENSG00000163083	INHBB	1.63607	3.10818	0.00690769	0.112012	17.8297	11.3579	55.4177	70.6698
ENSG00000215788	TNFRSF25	1.62918	3.09338	0.00314507	0.0877904	11.6186	12.137	35.9406	39.1551
ENSG00000211956	IGHV4-34	1.62478	3.08396	0.0167929	0.155012	35.2982	32.042	108.858	116.533
ENSG00000131016	AKAP12	1.61956	3.07282	0.0108499	0.130555	20.3674	11.6431	62.5853	142.464
ENSG00000176153	GPX2	1.61649	3.06628	0.15051	0.415347	26.4982	58.7316	81.2508	92.3936
ENSG00000211959	IGHV4-39	1.611	3.05464	0.0547367	0.260392	99.7337	132.105	304.651	399.247
ENSG00000236871	LINC00106	1.60622	3.04453	0.00434132	0.0966554	1.33916	1.61878	4.07709	3.0415
ENSG00000173894	CBX2	1.59941	3.03018	0.0222407	0.172015	11.8397	16.7959	35.8764	40.8854
ENSG00000150630	VEGFC	1.59741	3.02599	0.0120809	0.136106	6.33245	3.39611	19.1619	46.9688
ENSG00000254174	IGHV1-12	1.59165	3.01394	0.0502475	0.250077	0.860556	1.11723	2.59366	4.52819
ENSG00000140961	OSGIN1	1.5908	3.01217	0.0130765	0.140589	13.2158	12.637	39.8083	50.1897
ENSG00000207554	MIR647	1.5905	3.01154	0.00117687	0.0631256	0.409473	0.369143	1.23314	0.867095
ENSG00000115457	IGFBP2	1.58508	3.00025	0.0259826	0.185657	116.177	133.681	348.56	409.822
ENSG00000141068	KSR1	1.58193	2.99371	0.000699335	0.0576882	29.4235	17.7597	88.0852	77.907
ENSG00000254056	IGHV3-71	1.57664	2.98275	0.0437022	0.234131	0.70973	0.810048	2.11695	2.87822
ENSG00000200879	SNORD14E	1.57253	2.97427	0.00621284	0.108098	0.195869	0.155112	0.582567	0.488824
ENSG00000157613	CREB3L1	1.5668	2.96248	0.0331543	0.207027	80.4128	129.764	238.221	449.931
ENSG00000268903	AL627309.6	1.55607	2.94051	0.012149	0.136313	2.34617	3.043	6.89895	7.32729
ENSG00000120093	HOXB3	1.55175	2.93172	0.0228875	0.173784	14.8922	11.0766	43.6597	87.0328
ENSG00000102886	GDPD3	1.54281	2.91361	0.00492337	0.100227	4.14593	3.03063	12.0796	15.2027
ENSG00000259933	AC009065.3	1.53959	2.90711	0.0276794	0.190223	1.32552	1.96982	3.85344	4.32965
ENSG00000125775	SDCBP2	1.53953	2.90701	0.0131268	0.140589	11.5523	14.1299	33.5825	42.3798
ENSG00000185156	MFSD6L	1.53852	2.90496	0.044541	0.234809	4.16701	4.73623	12.105	14.2782
ENSG00000211644	IGLV1-51	1.53572	2.89934	0.0170781	0.156384	60.445	64.4621	175.25	157.426
ENSG00000211651	IGLV1-44	1.52789	2.88364	0.041181	0.228287	68.4235	93.8443	197.309	233.603
ENSG00000102878	HSF4	1.52652	2.88091	0.0124478	0.137775	19.1137	22.384	55.0649	50.0936
ENSG00000223350	IGLV9-49	1.52454	2.87695	0.0922716	0.335407	4.3377	6.73926	12.4793	17.8784
ENSG00000144485	HES6	1.52285	2.87357	0.0233059	0.175552	18.5096	20.0818	53.1888	73.4537
ENSG00000229092	IGHV3-47	1.52173	2.87135	0.0332518	0.207163	0.586614	0.635475	1.68438	2.06923
ENSG00000274816	MIR6772	1.52071	2.86932	0.0295278	0.195921	0.170739	0.259309	0.489904	0.470883
ENSG00000273619	AL121832.2	1.51012	2.84835	0.000689029	0.0576882	1.18089	0.742845	3.36359	2.71651
ENSG00000257084	MIR200CHG	1.50939	2.8469	0.00625856	0.108162	2.15481	1.96499	6.13454	7.09581
ENSG00000106541	AGR2	1.50725	2.84269	0.0259746	0.185657	416.103	359.412	1182.85	1568.35
ENSG00000152669	CCNO	1.5039	2.83609	0.0294336	0.195776	9.25476	9.11645	26.2473	47.479
ENSG00000173917	HOXB2	1.50341	2.83513	0.0276108	0.190223	6.92062	5.7674	19.6208	48.0686
ENSG00000115085	ZAP70	1.49355	2.81581	0.00185748	0.072481	7.22471	5.98109	20.3434	14.2615
ENSG00000210195	MT-TT	1.49064	2.81013	0.00493676	0.100227	0.133302	0.109254	0.374595	0.358202
ENSG00000260563	AC132872.1	1.48807	2.80514	9.46172e-06	0.0197883	2.37089	1.34738	6.65067	2.31233
ENSG00000164855	TMEM184A	1.48455	2.79831	0.00588289	0.105284	47.8867	47.4531	134.002	149.609
ENSG00000103269	RHBDL1	1.48039	2.79024	0.0108155	0.130555	4.91001	3.81259	13.7001	23.61
ENSG00000270933	AC010719.1	1.4786	2.78678	0.0178864	0.159144	1.33495	1.09635	3.72023	4.12797
ENSG00000115461	IGFBP5	1.47532	2.78046	0.00513748	0.101301	194.133	113.265	539.779	722.053
ENSG00000260418	AL023284.4	1.46823	2.76683	0.00161423	0.0695949	0.935277	0.693922	2.58775	1.39885
ENSG00000231663	COA6-AS1	1.46575	2.76207	0.0008075	0.0608328	0.890916	0.425597	2.46077	2.42343
ENSG00000221500	SNORD100	1.4642	2.75911	0.000149053	0.0522441	0.176074	0.106186	0.485808	0.229372
ENSG00000211658	IGLV3-27	1.46305	2.7569	0.167272	0.43691	20.1405	33.5805	55.5254	150.847
ENSG00000143882	ATP6V1C2	1.45857	2.74836	0.0162808	0.153823	6.16247	4.45974	16.9367	34.1575
ENSG00000267896		1.45709	2.74554	0.00244326	0.0792724	0.782795	0.776672	2.14919	0.688924
ENSG00000253274	IGHV1-67	1.45227	2.73639	0.0613031	0.27486	1.33512	1.49738	3.65342	4.60869
ENSG00000275713	H2BC9	1.4497	2.73151	0.10494	0.353545	1.41467	2.55888	3.86419	8.09109
ENSG00000188403	IGHV1OR15-9	1.44544	2.72346	0.0687514	0.290146	1.48944	1.88329	4.05641	4.62397
ENSG00000269352	PTOV1-AS2	1.44443	2.72155	0.000405863	0.0576882	2.37682	2.04197	6.46864	1.47049
ENSG00000258920	FOXN3-AS1	1.44405	2.72083	0.0205137	0.166922	2.36984	1.35562	6.44794	14.1788
ENSG00000066405	CLDN18	1.44075	2.71462	0.210311	0.485621	29.5916	56.6758	80.3297	202.832
ENSG00000196188	CTSE	1.43865	2.71067	0.138819	0.399818	89.3936	81.1346	242.316	467.685
ENSG00000254910	AC136475.2	1.43237	2.6989	0.00512952	0.101301	0.660997	0.511698	1.78396	2.23614
ENSG00000137218	FRS3	1.43214	2.69847	0.00386556	0.0930459	6.7257	2.80693	18.1491	32.4814
ENSG00000155265	GOLGA7B	1.43101	2.69636	0.0186897	0.16145	20.7802	13.652	56.0308	79.5711
ENSG00000104140	RHOV	1.42909	2.69277	0.0387969	0.221291	13.6518	10.4939	36.761	52.2282
ENSG00000177989	ODF3B	1.42859	2.69184	0.000747936	0.0580399	19.5164	13.3106	52.535	48.514
ENSG00000257671	KRT7-AS	1.42809	2.6909	0.00607832	0.106714	5.83932	5.56892	15.713	14.3883
ENSG00000172613	RAD9A	1.4203	2.6764	6.49938e-06	0.0189132	16.0691	5.2183	43.0075	23.3174
ENSG00000262902	MTCO1P40	1.41856	2.67318	0.192143	0.465652	20.8179	33.7022	55.6502	94.5225
ENSG00000211952	IGHV4-28	1.41316	2.66319	0.0364322	0.216664	5.86145	5.73221	15.6102	19.9393
ENSG00000106089	STX1A	1.41276	2.66246	0.00119541	0.0631256	12.8938	6.2501	34.3293	30.6105
ENSG00000100290	BIK	1.41146	2.66005	0.00173315	0.0707856	4.94404	3.44553	13.1514	9.03401
ENSG00000168350	DEGS2	1.41144	2.66002	0.0482108	0.244095	8.50126	9.94647	22.6135	28.3483
ENSG00000260428	SCX	1.41118	2.65954	0.00890624	0.122525	1.57048	1.12189	4.17677	5.21874
ENSG00000140548	ZNF710	1.40836	2.65434	0.00423134	0.0957035	38.2573	13.9794	101.548	141.862
ENSG00000271569	IGKV1OR2-6	1.40814	2.65395	0.0889379	0.32896	1.0172	1.34828	2.69959	3.08475
ENSG00000226179	LINC00685	1.40756	2.65289	0.00164893	0.0695949	0.615458	0.446729	1.63274	0.967718
ENSG00000108448	TRIM16L	1.40584	2.64971	0.0349452	0.212076	11.168	13.5864	29.5921	34.2879
ENSG00000280411	IGHV1-69D	1.40581	2.64967	0.10243	0.350836	42.1624	65.1815	111.717	140.573
ENSG00000277030	MIR8071-2	1.40388	2.64612	0.0404622	0.22676	0.214516	0.2877	0.567636	0.443474
ENSG00000146013	GFRA3	1.40369	2.64578	0.177122	0.449158	11.9467	24.2396	31.6084	52.2344
ENSG00000272821	U62317.2	1.40289	2.64431	4.29846e-05	0.0441797	3.92933	2.29793	10.3903	3.54636
ENSG00000011347	SYT7	1.40212	2.64289	0.0067705	0.111312	44.5866	33.0216	117.838	96.3927
ENSG00000166987	MBD6	1.40034	2.63964	0.000631706	0.0576882	64.1786	29.535	169.408	160.336
ENSG00000211660	IGLV2-23	1.39296	2.62618	0.0711102	0.295115	119.097	199.462	312.769	390.45
ENSG00000240204	SMKR1	1.39095	2.62251	0.0367059	0.216882	2.72178	1.92185	7.13788	12.0214
ENSG00000086619	ERO1B	1.38974	2.62031	0.00627636	0.108162	18.7984	8.77842	49.2577	67.6002
ENSG00000116990	MYCL	1.3897	2.62024	0.00803889	0.11785	8.35647	5.77072	21.8959	35.0077
ENSG00000244701	AC004918.1	1.38907	2.61909	0.00276457	0.0838149	1.85833	1.73881	4.86712	4.32382
ENSG00000215440	NPEPL1	1.38424	2.61035	0.00197162	0.0733217	12.8621	12.1547	33.5746	23.3233
ENSG00000136383	ALPK3	1.38264	2.60745	0.0109286	0.130555	42.408	39.8784	110.577	74.9738
ENSG00000130294	KIF1A	1.37923	2.60129	0.27249	0.551326	60.2024	127.059	156.604	243.121
ENSG00000196436	NPIPB15	1.37732	2.59785	0.0224045	0.172587	5.04239	5.36934	13.0994	16.4513
ENSG00000168071	CCDC88B	1.37605	2.59557	0.000216233	0.0569325	22.9468	15.1362	59.56	32.755
ENSG00000005206	SPPL2B	1.37349	2.59097	1.02001e-05	0.0197883	32.4571	18.085	84.0952	32.3078
ENSG00000180535	BHLHA15	1.37083	2.58618	0.0247006	0.180713	2.64095	2.23588	6.82998	8.92853
ENSG00000269981	AL627309.7	1.36536	2.57641	0.0186181	0.16145	1.17504	1.3645	3.02739	2.62098
ENSG00000115009	CCL20	1.36432	2.57455	0.0988229	0.345671	23.6479	27.6893	60.8827	155.201
ENSG00000089692	LAG3	1.3588	2.56472	0.0114896	0.133472	6.03639	5.30125	15.4816	13.6299
ENSG00000138834	MAPK8IP3	1.35453	2.55713	0.000679085	0.0576882	53.024	44.8705	135.589	53.076
ENSG00000092621	PHGDH	1.34779	2.54521	0.0475098	0.242937	24.2067	33.4675	61.6113	68.1484
ENSG00000185633	NDUFA4L2	1.34708	2.54397	0.00593496	0.10547	11.9277	9.68615	30.3439	33.1372
ENSG00000275632	AL035461.3	1.34635	2.54268	0.000471957	0.0576882	0.702418	0.431021	1.78602	0.697099
ENSG00000225217	HSPA7	1.34157	2.53427	0.0042633	0.0957035	6.95042	5.66736	17.6143	17.8914
ENSG00000116299	KIAA1324	1.34028	2.53201	0.084446	0.319801	96.0522	176.958	243.205	210.97
ENSG00000228288	PCAT6	1.33746	2.52706	0.00284743	0.0845512	4.06743	2.37057	10.2786	8.48009
ENSG00000008517	IL32	1.33178	2.51713	0.00565684	0.103291	48.4939	35.5203	122.065	126.764
ENSG00000111665	CDCA3	1.32831	2.51108	0.00306834	0.0866926	9.76366	6.92261	24.5173	15.7532
ENSG00000204991	SPIRE2	1.32294	2.50176	0.00162372	0.0695949	16.1089	12.3963	40.3004	25.2177
ENSG00000105388	CEACAM5	1.32213	2.50036	0.261413	0.542203	576.134	1147.93	1440.54	3981.78
ENSG00000237111	IGHJ3P	1.31985	2.49641	0.102656	0.350917	0.771603	1.11298	1.92624	2.23138
ENSG00000089820	ARHGAP4	1.31927	2.49541	0.000926067	0.0609687	34.5373	27.182	86.1845	52.8481
ENSG00000235280	MCF2L-AS1	1.31691	2.49131	0.0295728	0.195921	1.40436	1.22738	3.49869	4.96113
ENSG00000221539	SNORD99	1.31528	2.48851	0.00550885	0.102763	0.370221	0.355236	0.921299	0.431611
ENSG00000178038	ALS2CL	1.31391	2.48614	0.00332561	0.088904	23.1536	14.9012	57.5633	41.5278
ENSG00000270472	IGHV3OR16-9	1.31223	2.48326	0.0750442	0.302568	0.600155	0.739896	1.49034	1.3926
ENSG00000211962	IGHV1-46	1.31223	2.48325	0.0936433	0.337172	57.2362	72.3872	142.132	153.677
ENSG00000108602	ALDH3A1	1.31147	2.48195	0.267681	0.547979	29.1922	87.7522	72.4535	190.005
ENSG00000115468	EFHD1	1.31034	2.48	0.102738	0.350972	8.98593	13.5487	22.2851	42.6197
ENSG00000135127	BICDL1	1.30913	2.47792	0.000737235	0.0579826	14.1271	11.1966	35.0059	22.1641
ENSG00000277075	H2AC8	1.30776	2.47557	0.0862586	0.323262	1.70374	2.21452	4.21773	5.65907
ENSG00000211943	IGHV3-15	1.30683	2.47397	0.105693	0.35522	54.5831	73.3747	135.037	165.341
ENSG00000172543	CTSW	1.30666	2.47367	0.0515776	0.253367	6.96152	7.5581	17.2205	27.8396
ENSG00000182873	PRKCZ-AS1	1.30664	2.47365	0.00243194	0.0792724	2.49778	1.70538	6.17864	4.4592
ENSG00000126709	IFI6	1.30522	2.47122	0.0440006	0.234499	184.751	154.07	456.561	960.914
ENSG00000152117	SMPD4BP	1.30387	2.4689	0.000157091	0.0522441	15.007	9.99146	37.0507	18.6512
ENSG00000271178	IGHV3OR16-13	1.30217	2.46599	0.115732	0.368261	1.20032	2.01567	2.95998	4.5039
ENSG00000232177	MTND4P24	1.29903	2.46063	0.0898991	0.330938	2.83849	3.25235	6.98448	7.67715
ENSG00000198535	C2CD4A	1.29565	2.45488	0.0976447	0.34425	13.3409	19.6655	32.7503	49.017
ENSG00000198712	MT-CO2	1.29528	2.45425	0.00401126	0.0930459	3039.21	2352.3	7458.99	5201.11
ENSG00000253818	IGLV1-41	1.29469	2.45324	0.12503	0.382484	4.16583	6.97484	10.2198	10.345
ENSG00000272669	AL021707.6	1.29372	2.45159	0.00344787	0.0897984	1.11616	1.0632	2.73636	1.17415
ENSG00000276566	IGKV1D-13	1.29206	2.44877	0.143778	0.406437	5.62938	8.2143	13.7851	24.8894
ENSG00000100288	CHKB	1.29201	2.4487	0.000340537	0.0576882	4.27535	2.22564	10.469	5.89655
ENSG00000103168	TAF1C	1.28974	2.44485	3.62971e-05	0.0441797	30.4092	17.9344	74.3457	25.273
ENSG00000158805	ZNF276	1.28697	2.44015	2.66071e-05	0.0387134	14.1816	7.40309	34.6053	10.6094
ENSG00000211966	IGHV5-51	1.28631	2.43904	0.119	0.373559	124.146	172.241	302.798	374.121
ENSG00000237988	OR2I1P	1.28618	2.43882	0.0637033	0.278849	5.53389	6.92314	13.4962	19.8238
ENSG00000254709	IGLL5	1.28464	2.43621	0.0853308	0.32144	142.523	181.704	347.216	324.799
ENSG00000260260	SNHG19	1.28396	2.43506	0.00854248	0.120967	5.02015	4.69644	12.2244	11.0128
ENSG00000247627	MTND4P12	1.28279	2.43309	0.0274407	0.189899	62.3092	57.4127	151.604	126.137
ENSG00000116017	ARID3A	1.27974	2.42796	0.00036059	0.0576882	14.879	6.40535	36.1257	23.4322
ENSG00000237973	MTCO1P12	1.27805	2.4251	0.0687373	0.290146	269.724	443.643	654.11	734.139
ENSG00000211934	IGHV1-2	1.27458	2.41928	0.0803948	0.311669	64.0502	65.7096	154.955	190.454
ENSG00000132359	RAP1GAP2	1.27327	2.41708	0.000416108	0.0576882	21.8798	12.7723	52.8854	32.0853
ENSG00000168234	TTC39C	1.27147	2.41408	0.0208106	0.167986	24.1478	18.1912	58.2946	74.2831
ENSG00000221926	TRIM16	1.26888	2.40975	0.00402861	0.0930459	13.0992	10.2381	31.5658	22.8139
ENSG00000197774	EME2	1.26667	2.40605	0.000585385	0.0576882	12.1378	9.3494	29.2042	8.85374
ENSG00000172602	RND1	1.26535	2.40386	0.025402	0.183964	18.6338	17.1199	44.793	49.2807
ENSG00000276805	AL133216.2	1.2624	2.39894	0.00387473	0.0930459	1.10833	0.68403	2.65881	2.34596
ENSG00000211946	IGHV3-20	1.25968	2.39442	0.13845	0.399578	6.4364	11.6906	15.4115	23.5867
ENSG00000207425	AC138932.2	1.25796	2.39157	0.116221	0.368815	0.625252	0.853722	1.49533	1.40207
ENSG00000135596	MICAL1	1.25687	2.38977	1.30998e-05	0.0217831	39.5431	17.5001	94.4991	40.0078
ENSG00000161996	WDR90	1.25639	2.38897	0.000420402	0.0576882	26.0544	19.9821	62.2431	32.5031
ENSG00000088002	SULT2B1	1.25474	2.38623	0.0232669	0.17552	9.61601	8.03675	22.9461	28.4123
ENSG00000242580	IGKV1D-43	1.2543	2.38552	0.13539	0.394873	1.30682	2.19998	3.11745	4.26064
ENSG00000175197	DDIT3	1.25391	2.38486	0.00759314	0.115952	19.6746	10.4763	46.9213	56.5655
ENSG00000272556	GTF2IP13	1.25389	2.38483	0.00346372	0.0898681	1.14487	0.730461	2.73032	1.83412
ENSG00000187741	FANCA	1.2513	2.38056	0.000372503	0.0576882	14.196	7.54161	33.7945	21.0414
ENSG00000084636	COL16A1	1.24883	2.37648	0.000911925	0.0609687	35.6204	19.0696	84.6512	52.4618
ENSG00000133247	KMT5C	1.24703	2.37353	0.000895154	0.0609687	10.9143	7.1254	25.9055	17.0701
ENSG00000185324	CDK10	1.24204	2.36533	0.00038627	0.0576882	41.9728	29.376	99.2795	60.3789
ENSG00000167615	LENG8	1.24165	2.36468	0.00218074	0.0756035	130.132	116.66	307.721	183.263
ENSG00000012171	SEMA3B	1.24123	2.36399	0.0104152	0.128971	19.5345	11.8647	46.1795	36.7682
ENSG00000073150	PANX2	1.24055	2.36288	0.020305	0.166914	12.8168	12.4487	30.2847	32.8911
ENSG00000173486	FKBP2	1.2398	2.36166	0.00213893	0.074806	60.7264	36.0977	143.415	162.94
ENSG00000104731	KLHDC4	1.2387	2.35985	5.65492e-06	0.0189132	25.8925	9.17519	61.1026	24.5779
ENSG00000223705	NSUN5P1	1.23657	2.35638	0.00128935	0.0649696	15.6388	11.662	36.851	19.6478
ENSG00000188747	NOXA1	1.23449	2.35298	0.0371155	0.217528	15.9874	17.0574	37.6181	53.3543
ENSG00000211937	IGHV2-5	1.23432	2.3527	0.158202	0.426386	9.11184	14.4962	21.4374	26.2051
ENSG00000211893	IGHG2	1.23294	2.35046	0.100246	0.34707	530.157	967.187	1246.11	1126.71
ENSG00000221978	CCNL2	1.23177	2.34855	0.000224221	0.0569325	104.675	60.5419	245.835	125.933
ENSG00000228989		1.23129	2.34777	0.00146741	0.0681589	2.93755	1.45227	6.8967	6.35411
ENSG00000029993	HMGB3	1.22872	2.34359	0.0133473	0.141754	196.522	141.253	460.567	286.912
ENSG00000241244	IGKV1D-16	1.2283	2.34291	0.119091	0.373643	2.93899	3.22339	6.88577	9.10621
ENSG00000187961	KLHL17	1.2252	2.33788	0.000672249	0.0576882	7.59727	3.84978	17.7615	11.9223
ENSG00000108465	CDK5RAP3	1.22492	2.33743	0.00106129	0.0627076	100.027	65.8019	233.805	179.242
ENSG00000138135	CH25H	1.22478	2.3372	0.112988	0.364618	8.14416	6.55919	19.0345	47.8908
ENSG00000231331	AC103563.3	1.22477	2.33718	0.184459	0.457021	1.0005	1.50807	2.33836	2.77811
ENSG00000100941	PNN	1.224	2.33593	0.00207745	0.0747696	85.562	36.5436	199.867	248.627
ENSG00000280992		1.22173	2.33226	0.00532838	0.102212	0.163488	0.150588	0.381298	0.0830844
ENSG00000271032	AC020907.4	1.22012	2.32966	0.0193041	0.163418	0.90254	0.950012	2.10261	1.22745
ENSG00000173209	AHSA2P	1.21784	2.32598	0.00303658	0.0864201	35.4254	29.7113	82.3989	29.7359
ENSG00000142185	TRPM2	1.21737	2.32522	0.0012672	0.0647785	14.2398	8.91901	33.1105	16.885
ENSG00000211648	IGLV1-47	1.21369	2.31929	0.0858596	0.322597	54.8117	64.5193	127.125	157.083
ENSG00000148735	PLEKHS1	1.21102	2.31501	0.0928002	0.3363	16.1599	20.8979	37.4103	36.2579
ENSG00000261373	VPS9D1-AS1	1.21097	2.31494	0.00850555	0.12083	4.52373	3.23781	10.4721	10.271
ENSG00000138623	SEMA7A	1.21032	2.31389	0.00529629	0.102212	10.766	7.2833	24.9113	22.9761
ENSG00000196123	KIAA0895L	1.20695	2.30848	0.000675238	0.0576882	16.6991	14.2976	38.5496	12.5672
ENSG00000177685	CRACR2B	1.20416	2.30404	0.0134758	0.142158	34.6021	31.0001	79.7245	66.9815
ENSG00000106003	LFNG	1.19973	2.29697	0.00203154	0.0743622	37.0533	25.4177	85.1103	49.5601
ENSG00000211898	IGHD	1.19809	2.29436	0.146043	0.408944	39.4735	47.852	90.5666	126.6
ENSG00000104859	CLASRP	1.19621	2.29138	0.000110807	0.0460639	30.4394	17.5069	69.748	26.9911
ENSG00000207547	MIR25	1.19563	2.29044	0.0239162	0.1776	0.384912	0.341909	0.881618	0.628338
ENSG00000242766	IGKV1D-17	1.19481	2.28914	0.26344	0.544019	5.35855	8.71413	12.2665	22.433
ENSG00000197989	SNHG12	1.19441	2.28851	0.000706522	0.0576882	13.6792	8.33641	31.3051	15.96
ENSG00000211677	IGLC2	1.19101	2.28313	0.0677921	0.288625	334.204	469.066	763.032	706.866
ENSG00000220785	MTMR9LP	1.18963	2.28094	0.00222515	0.0761788	6.21258	4.04055	14.1705	8.24188
ENSG00000254682	AP002387.2	1.18828	2.27881	0.00542644	0.102763	1.5407	0.842866	3.51096	2.69603
ENSG00000211625	IGKV3D-20	1.18596	2.27515	0.133219	0.392115	13.5034	16.5398	30.7222	40.612
ENSG00000181085	MAPK15	1.18585	2.27498	0.0716307	0.295753	13.3516	20.7622	30.3747	27.0214
ENSG00000164877	MICALL2	1.18557	2.27454	0.00682892	0.111956	50.3484	31.7677	114.519	108.059
ENSG00000264175	MIR3189	1.18348	2.27123	0.146511	0.409541	0.346925	0.802587	0.787947	1.46298
ENSG00000259772	AC012236.1	1.1826	2.26985	0.040683	0.227313	3.98193	2.62576	9.03838	12.4029
ENSG00000099889	ARVCF	1.18138	2.26794	0.00394876	0.0930459	16.3387	10.0491	37.0552	29.4613
ENSG00000196756	SNHG17	1.18078	2.267	0.00027699	0.0575437	19.691	9.24476	44.6395	22.9487
ENSG00000198727	MT-CYB	1.17956	2.26507	0.0077859	0.116638	2937.62	1900.53	6653.92	4933.62
ENSG00000248527	MTATP6P1	1.17647	2.26023	0.00578824	0.104963	322.326	210.429	728.532	504.088
ENSG00000272645	GTF2IP20	1.17583	2.25923	0.00764505	0.115981	5.05633	4.72146	11.4234	8.63314
ENSG00000110455	ACCS	1.17325	2.25519	0.00450841	0.0971923	12.8691	10.888	29.0222	18.6998
ENSG00000118849	RARRES1	1.17252	2.25405	0.0627156	0.277149	23.5923	24.893	53.1781	97.177
ENSG00000118369	USP35	1.17083	2.25142	0.000728841	0.0579826	9.68083	5.73755	21.7956	14.6706
ENSG00000229413	AC018638.1	1.17077	2.25131	0.0014795	0.0681589	0.948879	0.699668	2.13622	0.594439
ENSG00000123358	NR4A1	1.17051	2.25092	0.0446805	0.235331	58.2221	71.2246	131.053	110.172
ENSG00000173137	ADCK5	1.16972	2.24969	0.00513971	0.101301	11.9101	7.36038	26.794	29.9477
ENSG00000253239	IGLVI-70	1.16624	2.24426	0.311289	0.587774	5.20415	9.27266	11.6795	23.9061
ENSG00000172183	ISG20	1.16239	2.23827	0.00153046	0.0691891	31.389	21.1671	70.2573	36.0378
ENSG00000272849	AC084018.1	1.15988	2.23439	0.00245004	0.0792724	0.922196	0.552214	2.06054	0.820002
ENSG00000115657	ABCB6	1.15778	2.23113	0.00208583	0.0747696	8.18014	4.67	18.251	12.215
ENSG00000075399	VPS9D1	1.1564	2.22901	0.000326722	0.0576882	18.5636	10.7543	41.3785	19.2952
ENSG00000202441	RNY4P10	1.15611	2.22856	0.00939047	0.124396	0.214633	0.147456	0.478321	0.314906
ENSG00000161835	GRASP	1.15544	2.22752	0.0122695	0.136709	6.90675	5.97602	15.3849	11.7145
ENSG00000137285	TUBB2B	1.15425	2.22569	0.213317	0.488973	14.3888	29.6484	32.025	52.8299
ENSG00000132329	RAMP1	1.15116	2.22092	0.133082	0.391973	32.9016	39.2661	73.072	160.755
ENSG00000128342	LIF	1.15006	2.21924	0.0432737	0.233619	27.201	35.161	60.3655	65.0495
ENSG00000269131		1.14906	2.2177	0.000701442	0.0576882	6.92629	5.16814	15.3604	5.80089
ENSG00000120685	PROSER1	1.14761	2.21546	0.00413622	0.0946038	46.3302	16.1329	102.643	114.055
ENSG00000143546	S100A8	1.14577	2.21265	0.106584	0.356422	17.1264	22.7727	37.8948	88.9731
ENSG00000122176	FMOD	1.14573	2.21259	0.0877713	0.326667	61.2656	51.468	135.555	330.169
ENSG00000257270	AL928654.2	1.14479	2.21114	0.00489214	0.100227	1.01421	0.811492	2.24257	0.832752
ENSG00000204149	AGAP6	1.13888	2.20209	0.00120267	0.0631256	5.89574	3.62122	12.983	6.19286
ENSG00000105122	RASAL3	1.13208	2.19175	0.00451726	0.0971923	11.8104	8.06853	25.8854	16.3399
ENSG00000160211	G6PD	1.13174	2.19122	0.042998	0.232681	126.415	114.003	277.003	314.376
ENSG00000125319	HROB	1.13024	2.18895	0.0195346	0.163683	6.41071	5.10006	14.0327	13.2748
ENSG00000003249	DBNDD1	1.12949	2.18782	0.00290162	0.0846703	25.5251	13.1339	55.8442	34.801
ENSG00000211459	MT-RNR1	1.12873	2.18667	0.0197555	0.164181	530.136	233.751	1159.23	1541.08
ENSG00000167508	MVD	1.12626	2.18292	0.000900611	0.0609687	33.6036	19.9418	73.354	41.5889
ENSG00000185507	IRF7	1.12528	2.18145	0.00232163	0.0784018	37.5288	15.3477	81.8671	94.9126
ENSG00000151012	SLC7A11	1.12451	2.18027	0.0513105	0.252469	24.8321	22.5372	54.1407	51.5362
ENSG00000136732	GYPC	1.12239	2.17707	0.00777041	0.116556	14.6533	10.3042	31.9012	28.4583
ENSG00000166123	GPT2	1.12162	2.17591	0.0357874	0.214739	60.4554	62.9604	131.545	151.168
ENSG00000243679	AC018638.5	1.11976	2.1731	0.00704219	0.112289	7.08704	6.28073	15.4009	7.7825
ENSG00000206754	SNORD101	1.11906	2.17206	0.0166916	0.154813	0.120861	0.121462	0.262517	0.113809
ENSG00000225523	IGKV6D-21	1.11876	2.1716	0.321843	0.596063	5.58836	11.5956	12.1357	28.2269
ENSG00000212907	MT-ND4L	1.11808	2.17057	0.00655802	0.109444	467.325	284.133	1014.36	718.35
ENSG00000243290	IGKV1-12	1.1145	2.16521	0.145833	0.408544	2.48588	3.59077	5.38244	6.43431
ENSG00000110719	TCIRG1	1.11363	2.16389	0.000264734	0.0575437	108.63	52.7866	235.062	120.731
ENSG00000102901	CENPT	1.11042	2.15908	0.00118366	0.0631256	23.3683	13.4835	50.4542	30.1848
ENSG00000101104	PABPC1L	1.10878	2.15663	0.00960295	0.125023	30.7152	32.4858	66.2413	25.1665
ENSG00000185101	ANO9	1.10862	2.15639	0.021082	0.168569	38.1047	48.3956	82.1688	51.9263
ENSG00000185052	SLC24A3	1.10802	2.1555	0.0257615	0.184759	6.68393	5.40897	14.4072	14.8971
ENSG00000182796	TMEM198B	1.10566	2.15197	0.000901493	0.0609687	11.4141	8.09287	24.5629	8.00794
ENSG00000214530	STARD10	1.10313	2.14821	0.00724344	0.113477	89.3001	46.6989	191.835	186
ENSG00000271869	AC026979.2	1.10145	2.1457	0.0222658	0.172045	0.741652	0.594374	1.59136	1.54107
ENSG00000178999	AURKB	1.10045	2.14421	0.044472	0.234794	14.3961	13.1127	30.8683	30.0904
ENSG00000203883	SOX18	1.09846	2.14126	0.00411887	0.0945634	4.58962	2.63731	9.82759	7.78191
ENSG00000104835	SARS2	1.09714	2.1393	0.000125615	0.0487388	4.54849	1.67454	9.73058	4.27096
ENSG00000258469	CHMP4BP1	1.09455	2.13547	0.0106155	0.129514	1.70792	1.08769	3.6472	2.83159
ENSG00000273142	LINC02604	1.09234	2.13219	0.0166055	0.154813	9.81793	9.65404	20.9337	12.8325
ENSG00000213928	IRF9	1.09144	2.13087	0.000366808	0.0576882	6.86061	2.76134	14.619	8.25469
ENSG00000159228	CBR1	1.09057	2.12959	0.0429829	0.232681	67.4571	44.4953	143.656	184.91
ENSG00000213903	LTB4R	1.08992	2.12863	0.00256959	0.0815115	8.49456	5.25043	18.0818	8.24453
ENSG00000184702	SEPTIN5	1.08866	2.12677	0.0186364	0.16145	14.6656	7.07994	31.1903	36.9445
ENSG00000101194	SLC17A9	1.08761	2.12521	0.0765376	0.304998	33.3377	32.2456	70.8497	81.5384
ENSG00000276381		1.08574	2.12247	0.00899186	0.122582	0.126058	0.0824616	0.267553	0.117734
ENSG00000211979	IGHV7-81	1.08474	2.121	0.118005	0.371941	0.887001	0.975251	1.88133	3.1147
ENSG00000140400	MAN2C1	1.08416	2.12014	0.000778842	0.0596429	43.7658	27.0595	92.7894	38.5887
ENSG00000128422	KRT17	1.08297	2.11839	0.0993249	0.345671	19.2595	21.7141	40.7991	36.3663
ENSG00000108551	RASD1	1.08278	2.11812	0.0691602	0.290945	36.7255	34.163	77.789	64.4881
ENSG00000168398	BDKRB2	1.08237	2.11751	0.0224093	0.172587	12.1828	9.27429	25.7973	32.5918
ENSG00000171163	ZNF692	1.08222	2.1173	0.00184982	0.072481	25.2522	18.2942	53.4665	26.6434
ENSG00000158106	RHPN1	1.08202	2.117	0.0276617	0.190223	32.3729	29.0049	68.5333	60.7024
ENSG00000091592	NLRP1	1.08078	2.11517	0.0329411	0.206258	31.2112	23.0318	66.0171	77.2822
ENSG00000151376	ME3	1.07976	2.11369	0.000895489	0.0609687	16.6656	10.1399	35.2258	16.2567
ENSG00000145287	PLAC8	1.07874	2.11218	0.099123	0.345671	8.48075	8.99185	17.9129	33.1045
ENSG00000258199	AC073896.4	1.07787	2.11092	0.00676209	0.111312	2.43745	1.28095	5.14528	4.05367
ENSG00000130810	PPAN	1.07635	2.10869	0.00190983	0.0726486	3.87677	1.9892	8.17492	4.31067
ENSG00000273137	AL022328.2	1.07533	2.1072	0.0102499	0.128525	1.05848	0.957111	2.23042	0.780166
ENSG00000074370	ATP2A3	1.07515	2.10694	0.0102675	0.128525	69.6196	52.288	146.685	107.984
ENSG00000198517	MAFK	1.07331	2.10425	0.0070992	0.112825	44.1933	36.9199	92.9938	63.097
ENSG00000196684	HSH2D	1.07319	2.10408	0.000942404	0.0609687	19.195	10.0669	40.3877	22.7007
ENSG00000197114	ZGPAT	1.0729	2.10366	0.00148146	0.0681589	7.98071	4.27131	16.7887	7.57674
ENSG00000188185	LINC00265	1.07167	2.10187	0.00526899	0.102212	5.43374	4.14749	11.421	6.26943
ENSG00000211771	TRBJ2-7	1.07101	2.1009	0.0942424	0.337894	0.0914689	0.077476	0.192167	0.195315
ENSG00000072778	ACADVL	1.06864	2.09746	0.00333049	0.088904	204.067	128.69	428.023	400.675
ENSG00000179862	CITED4	1.06728	2.09548	0.0327509	0.205998	4.40039	4.48029	9.22091	6.57741
ENSG00000099812	MISP	1.06716	2.09531	0.0460829	0.239574	42.9519	41.8848	89.9976	99.2971
ENSG00000125503	PPP1R12C	1.067	2.09508	9.85367e-05	0.0459787	45.5307	20.5591	95.3903	37.572
ENSG00000197912	SPG7	1.06679	2.09477	8.71066e-05	0.0450955	59.585	27.1338	124.817	51.9589
ENSG00000198886	MT-ND4	1.06589	2.09346	0.0113758	0.1332	6019.65	3519.24	12601.9	8347.65
ENSG00000140403	DNAJA4	1.06538	2.09272	0.00899884	0.122582	26.9561	10.7798	56.4116	80.1858
ENSG00000135451	TROAP	1.06404	2.09077	0.0425017	0.231286	14.5501	12.667	30.4209	20.9066
ENSG00000171557	FGG	1.06368	2.09026	0.363761	0.632505	267.219	496.748	558.555	1222.11
ENSG00000196476	C20orf96	1.06333	2.08975	0.0022435	0.0763576	10.3375	6.93047	21.6027	12.7593
ENSG00000198563	DDX39B	1.06185	2.08761	0.00113878	0.0631256	76.3108	52.5185	159.307	52.4261
ENSG00000198804	MT-CO1	1.061	2.08638	0.00693098	0.112207	6930.55	3746.02	14459.8	10268.8
ENSG00000182325	FBXL6	1.06092	2.08626	0.000901741	0.0609687	17.4418	8.24689	36.388	23.9294
ENSG00000006118	TMEM132A	1.06085	2.08616	0.0103908	0.128944	42.7374	33.1714	89.1569	55.7271
ENSG00000178814	OPLAH	1.06041	2.08553	0.0158927	0.153053	22.3708	17.499	46.6549	29.74
ENSG00000233223	AC016876.2	1.05946	2.08416	0.00974899	0.125668	3.39931	2.18651	7.08469	4.98038
ENSG00000149716	LTO1	1.05848	2.08274	0.000989357	0.0611243	14.6331	6.15089	30.4769	21.2629
ENSG00000167702	KIFC2	1.05758	2.08143	0.0386449	0.220804	20.5719	23.5213	42.8189	39.2694
ENSG00000135473	PAN2	1.05596	2.07911	0.00172616	0.0707482	30.6492	18.9036	63.723	26.2894
ENSG00000265452	MIR3682	1.05595	2.07909	0.00880304	0.122525	0.207311	0.112995	0.431017	0.329153
ENSG00000211965	IGHV3-49	1.05578	2.07884	0.168174	0.437855	41.7234	53.1508	86.7361	87.329
ENSG00000275888	AC132872.3	1.05505	2.07779	0.0183382	0.160435	1.07511	1.24027	2.23386	0.588828
ENSG00000141013	GAS8	1.05388	2.0761	0.000604408	0.0576882	18.056	9.62334	37.4862	16.299
ENSG00000183036	PCP4	1.05384	2.07605	0.295489	0.571249	9.65578	17.8219	20.0459	24.4751
ENSG00000267519	AC020916.1	1.05275	2.07447	0.0353806	0.213605	15.8284	18.5141	32.8357	19.5368
ENSG00000240671	IGKV1-8	1.05204	2.07346	0.240378	0.520269	11.2289	21.4344	23.2827	44.7941
ENSG00000101004	NINL	1.05116	2.07219	0.00265211	0.0826043	19.6472	12.3815	40.7127	17.7831
ENSG00000198763	MT-ND2	1.05073	2.07158	0.0302816	0.198133	2793.12	2110.76	5786.19	4795.41
ENSG00000198899	MT-ATP6	1.04903	2.06913	0.01579	0.152528	1932.17	1281.48	3997.92	2732.92
ENSG00000250571	GLI4	1.04891	2.06896	0.00733452	0.113735	11.6492	9.52176	24.1018	18.7959
ENSG00000101199	ARFGAP1	1.04889	2.06894	6.41144e-05	0.0441797	89.2715	34.6274	184.697	70.8504
ENSG00000188483	IER5L	1.04736	2.06674	0.031194	0.200385	11.5827	7.9603	23.9385	24.7739
ENSG00000124374	PAIP2B	1.04692	2.06612	0.0457809	0.238536	14.2996	7.4405	29.5447	45.8341
ENSG00000211935	IGHV1-3	1.04682	2.06597	0.328918	0.602454	3.07537	5.52725	6.35361	16.6665
ENSG00000180096	SEPTIN1	1.04571	2.06438	0.00587522	0.105284	10.8859	6.87413	22.4726	12.8277
ENSG00000159231	CBR3	1.0456	2.06423	0.0954868	0.340658	6.64107	7.7915	13.7087	19.5639
ENSG00000270550	IGHV3-30	1.04492	2.06325	0.133252	0.392115	29.0095	33.0884	59.8538	62.1689
ENSG00000213085	CFAP45	1.04034	2.05672	0.0898152	0.330938	6.23553	7.12467	12.8247	18.0742
ENSG00000239569	KMT2E-AS1	1.04031	2.05667	0.0151046	0.149338	2.70753	2.0696	5.56848	4.40075
ENSG00000106804	C5	1.03987	2.05605	0.241267	0.520739	47.6194	73.646	97.9079	282.143
ENSG00000178773	CPNE7	1.03826	2.05375	0.0472588	0.242012	6.40095	3.88073	13.1459	15.2176
ENSG00000270804	AC010326.4	1.03753	2.05271	0.00265214	0.0826043	2.28734	0.957961	4.69525	2.9029
ENSG00000199753	SNORD104	1.0364	2.05111	0.0868517	0.324544	1.19031	1.50377	2.44145	2.84142
ENSG00000183444	OR7E38P	1.03467	2.04865	0.00897962	0.122582	5.20412	2.88105	10.6614	8.59419
ENSG00000137077	CCL21	1.0268	2.03751	0.134822	0.394304	29.3853	40.3838	59.8728	120.313
ENSG00000173621	LRFN4	1.02535	2.03546	0.0141507	0.144486	10.1796	8.04922	20.72	13.3
ENSG00000225630	MTND2P28	1.02533	2.03543	0.0294517	0.195784	121.123	86.5927	246.536	189.041
ENSG00000255717	SNHG1	1.02531	2.0354	0.000473295	0.0576882	32.6619	18.0165	66.48	23.7162
ENSG00000213015	ZNF580	1.02515	2.03517	0.00092999	0.0609687	14.2511	6.26516	29.0034	20.0692
ENSG00000228253	MT-ATP8	1.02436	2.03406	0.0116087	0.133953	356.978	211.058	726.115	490.797
ENSG00000261061	AC092718.4	1.02423	2.03388	0.0130471	0.140589	3.04612	2.02672	6.19542	3.84017
ENSG00000210082	MT-RNR2	1.02125	2.02967	0.0266136	0.187709	4315.19	2153.74	8758.42	9468.39
ENSG00000140983	RHOT2	1.01656	2.02309	0.000155666	0.0522441	61.4296	34.0369	124.277	48.126
ENSG00000211663	IGLV3-19	1.01553	2.02165	0.228512	0.506325	220.102	337.581	444.97	542.813
ENSG00000103485	QPRT	1.01526	2.02126	0.0756449	0.30355	41.7365	38.8029	84.3605	69.3277
ENSG00000140297	GCNT3	1.01301	2.01812	0.188898	0.461456	31.1688	47.2363	62.9025	103.592
ENSG00000131203	IDO1	1.01208	2.01682	0.110824	0.361141	22.9775	22.6524	46.3415	82.528
ENSG00000187608	ISG15	1.00853	2.01186	0.0919112	0.334745	75.1998	73.4048	151.292	233.345
ENSG00000110777	POU2AF1	1.00796	2.01106	0.14535	0.408074	25.5826	27.7178	51.4483	44.9959
ENSG00000160072	ATAD3B	1.00789	2.01097	0.00985432	0.126355	27.1941	20.0555	54.6865	35.2653
ENSG00000099958	DERL3	1.00757	2.01052	0.0597638	0.271103	38.9453	40.2653	78.3006	65.2395
ENSG00000137841	PLCB2	1.00669	2.0093	0.0260268	0.185738	31.1806	25.9471	62.651	50.5148
ENSG00000021826	CPS1	1.00538	2.00747	0.514109	0.747774	265.287	933.557	532.555	992.354
ENSG00000072818	ACAP1	1.0048	2.00667	0.00912547	0.122656	16.7315	10.1968	33.5747	21.2297
ENSG00000037897	METTL1	1.00398	2.00553	0.013062	0.140589	24.6388	13.5179	49.4138	54.7099
ENSG00000158062	UBXN11	1.00379	2.00526	0.00306591	0.0866926	23.6474	10.8716	47.4192	29.4959
ENSG00000184381	PLA2G6	1.00305	2.00423	0.0425595	0.231492	16.7385	19.8884	33.5479	18.9082
ENSG00000112578	BYSL	1.00278	2.00385	0.0364818	0.216664	23.2649	10.0496	46.6195	88.2247
ENSG00000010295	IFFO1	1.00164	2.00228	0.00401647	0.0930459	8.61553	5.30329	17.2507	8.55294
ENSG00000188549	CCDC9B	0.99886	1.99842	0.018736	0.161546	11.8543	8.21231	23.6899	16.6887
ENSG00000167797	CDK2AP2	0.9987	1.9982	0.0140522	0.144486	86.3424	65.5351	172.529	138.288
ENSG00000239819	IGKV1D-8	0.99685	1.99564	0.19242	0.465745	3.35216	5.05184	6.6897	7.38614
ENSG00000063169	BICRA	0.996547	1.99522	0.00209719	0.0747696	16.7174	8.28029	33.3548	19.1378
ENSG00000004777	ARHGAP33	0.9958	1.99419	0.0244972	0.17979	11.7219	13.6574	23.3756	11.7997
ENSG00000108352	RAPGEFL1	0.995724	1.99408	0.0568659	0.26405	11.0743	11.319	22.0831	27.8309
ENSG00000138080	EMILIN1	0.992641	1.98982	0.00237934	0.0792724	56.4918	24.2692	112.409	53.4091
ENSG00000100429	HDAC10	0.992221	1.98925	0.0131517	0.140693	8.41374	6.33093	16.737	11.3862
ENSG00000239521	CASTOR3	0.990704	1.98715	0.00526993	0.102212	11.038	5.53247	21.9342	13.9869
ENSG00000130702	LAMA5	0.989421	1.98539	0.0120594	0.136106	137.351	92.5008	272.695	198.733
ENSG00000236144	TMEM147-AS1	0.989053	1.98488	0.00538388	0.10226	7.75522	4.73515	15.3932	8.57818
ENSG00000168484	SFTPC	0.988635	1.98431	0.427032	0.685497	509.666	972.121	1011.33	2427.27
ENSG00000272034	SNORD14A	0.988535	1.98417	0.0200994	0.165622	0.462396	0.346081	0.917473	0.577726
ENSG00000142330	CAPN10	0.985689	1.98026	0.00274528	0.0838149	20.177	11.7541	39.9557	19.9652
ENSG00000168003	SLC3A2	0.985136	1.9795	0.000298584	0.0575437	135.489	41.6614	268.201	131.811
ENSG00000264577	AC010761.1	0.985023	1.97934	0.00313818	0.0877904	1.5311	0.834576	3.03057	1.61993
ENSG00000198873	GRK5	0.979966	1.97242	0.0146479	0.146857	14.8851	10.0107	29.3597	23.8053
ENSG00000204634	TBC1D8	0.97746	1.969	0.0185036	0.161094	28.9065	24.4175	56.9167	27.6379
ENSG00000166986	MARS1	0.975816	1.96675	0.0023869	0.0792724	111.663	39.2471	219.613	177.616
ENSG00000252743	RNU6-850P	0.975666	1.96655	0.0665091	0.285565	0.187245	0.167865	0.368226	0.187764
ENSG00000272523	LINC01023	0.975343	1.96611	0.026751	0.187973	0.985627	0.770585	1.93785	1.45803
ENSG00000255135	AP002360.2	0.973219	1.96322	0.0143257	0.145437	3.13338	2.06337	6.15149	4.92593
ENSG00000160957	RECQL4	0.972545	1.9623	0.0271509	0.18888	24.9276	18.6975	48.9155	32.0835
ENSG00000006015	REX1BD	0.971047	1.96026	0.0127219	0.13931	19.5612	13.7642	38.3451	21.4202
ENSG00000215908	CROCCP2	0.967239	1.9551	0.00364455	0.0916255	17.2688	12.592	33.7621	13.2495
ENSG00000175538	KCNE3	0.966527	1.95413	0.0437889	0.234131	12.0758	8.55428	23.5976	22.0305
ENSG00000189377	CXCL17	0.964112	1.95086	0.0811325	0.313228	243.719	227.063	475.462	565.333
ENSG00000114378	HYAL1	0.963627	1.95021	0.0713633	0.295484	8.01633	7.71563	15.6335	12.6602
ENSG00000165905	LARGE2	0.963044	1.94942	0.0580821	0.266621	35.2886	28.368	68.7922	54.9733
ENSG00000175463	TBC1D10C	0.962662	1.9489	0.0251276	0.182461	10.9528	9.05806	21.346	12.8107
ENSG00000241755	IGKV1-9	0.961721	1.94763	0.199964	0.474145	54.3402	60.9771	105.835	135.108
ENSG00000272398	CD24	0.961717	1.94763	0.0141293	0.144486	208.558	166.157	406.193	227.479
ENSG00000255198	SNHG9	0.96146	1.94728	0.0329303	0.206258	2.97668	2.44527	5.79642	4.8094
ENSG00000173702	MUC13	0.961231	1.94697	0.417893	0.678892	24.9682	55.4035	48.6124	100.831
ENSG00000130522	JUND	0.961138	1.94684	0.00155308	0.0695304	97.4904	44.841	189.799	101.502
ENSG00000137474	MYO7A	0.96058	1.94609	0.0234907	0.176636	16.0275	13.0135	31.191	17.8177
ENSG00000182240	BACE2	0.95971	1.94492	0.0352399	0.213198	80.7959	59.754	157.141	169.691
ENSG00000166086	JAM3	0.958131	1.94279	0.0587587	0.268111	18.839	16.4225	36.6003	48.4388
ENSG00000160284	SPATC1L	0.957983	1.94259	0.100793	0.347531	5.06146	5.16173	9.83235	6.1319
ENSG00000211924	IGHD3-9	0.957801	1.94235	0.192818	0.466064	0.0773423	0.0850747	0.150226	0.198932
ENSG00000110944	IL23A	0.956736	1.94091	0.071379	0.295484	2.60176	3.63515	5.0498	6.0475
ENSG00000198794	SCAMP5	0.956245	1.94025	0.0237827	0.177181	21.8434	14.6116	42.3817	38.354
ENSG00000064687	ABCA7	0.956138	1.94011	0.00263107	0.0826043	32.6776	18.0011	63.3982	24.6934
ENSG00000105696	TMEM59L	0.955878	1.93976	0.268424	0.548535	11.1675	14.4442	21.6622	37.9223
ENSG00000273058	AL359921.2	0.95541	1.93913	0.008385	0.119887	0.934625	0.612667	1.81236	0.932312
ENSG00000171680	PLEKHG5	0.954985	1.93856	0.0182733	0.160435	18.4199	15.4777	35.708	23.5662
ENSG00000099326	MZF1	0.954963	1.93853	0.00994245	0.126619	16.9479	14.3744	32.8541	13.8065
ENSG00000198938	MT-CO3	0.954564	1.93799	0.0191404	0.162746	4144.48	2266.24	8031.98	6263.56
ENSG00000160796	NBEAL2	0.953833	1.93701	0.00113164	0.0631256	61.4807	32.5155	119.089	31.8164
ENSG00000183401	CCDC159	0.952143	1.93474	0.0057113	0.104037	14.1109	11.5659	27.3009	13.1582
ENSG00000167967	E4F1	0.951987	1.93453	0.000642018	0.0576882	25.5492	12.9342	49.4258	23.3857
ENSG00000121552	CSTA	0.951984	1.93453	0.0635727	0.278609	5.22579	3.95267	10.1095	11.4118
ENSG00000279413	AC112497.2	0.951884	1.9344	0.00186391	0.072481	1.26595	0.622072	2.44886	0.814094
ENSG00000162576	MXRA8	0.951593	1.93401	0.0326678	0.205765	67.7199	44.3887	130.971	117.562
ENSG00000211964	IGHV3-48	0.951363	1.9337	0.247962	0.526448	20.8495	34.5275	40.3166	45.6901
ENSG00000183963	SMTN	0.949126	1.9307	0.000206295	0.0558436	35.9457	18.8162	69.4004	16.9702
ENSG00000167874	TMEM88	0.948565	1.92995	0.0156305	0.151942	1.56442	1.24948	3.01926	1.70009
ENSG00000123689	G0S2	0.948173	1.92943	0.169857	0.439852	23.3803	22.3133	45.1106	100.507
ENSG00000200534	SNORA33	0.947542	1.92858	0.0438378	0.234257	0.749595	1.11433	1.44566	0.693756
ENSG00000177595	PIDD1	0.945958	1.92647	0.00402217	0.0930459	15.822	10.4862	30.4805	14.1031
ENSG00000266714	MYO15B	0.945333	1.92563	0.0543703	0.259733	30.0587	34.0757	57.882	27.4242
ENSG00000058453	CROCC	0.944946	1.92512	0.0129419	0.140001	20.3047	15.8014	39.0889	18.9073
ENSG00000105369	CD79A	0.944748	1.92485	0.16529	0.43411	26.9779	33.5847	51.9285	50.5141
ENSG00000211949	IGHV3-23	0.944274	1.92422	0.20397	0.478503	114.473	139.397	220.271	254.209
ENSG00000110057	UNC93B1	0.944185	1.9241	0.00426659	0.0957035	63.7796	21.0669	122.719	113.8
ENSG00000213398	LCAT	0.94403	1.9239	0.0250128	0.181887	6.25151	5.84321	12.0272	5.04004
ENSG00000161265	U2AF1L4	0.943839	1.92364	0.00702392	0.112289	9.30229	5.9724	17.8943	8.86489
ENSG00000213995	NAXD	0.943441	1.92311	0.00290122	0.0846703	35.6293	12.862	68.5191	48.0874
ENSG00000173110	HSPA6	0.942938	1.92244	0.174976	0.44577	15.3244	19.5276	29.4602	72.5075
ENSG00000179406	LINC00174	0.942087	1.92131	0.0282991	0.191822	8.85353	6.69576	17.0103	9.48783
ENSG00000173992	CCS	0.940456	1.91914	0.000951684	0.0609687	29.1173	14.0049	55.88	24.0314
ENSG00000269936		0.939981	1.9185	0.0495007	0.248036	4.3741	4.35065	8.39174	5.07227
ENSG00000235241	BX284668.4	0.939951	1.91846	0.0885206	0.327972	1.3526	1.71567	2.59491	3.36816
ENSG00000272086	AC025181.2	0.93921	1.91748	0.0114767	0.133462	2.69704	1.28341	5.17151	3.65471
ENSG00000215252	GOLGA8B	0.938316	1.91629	0.0420866	0.230211	18.797	21.6126	36.0205	19.8122
ENSG00000197976	AKAP17A	0.937887	1.91572	0.000500002	0.0576882	39.9355	19.7202	76.5052	20.975
ENSG00000167700	MFSD3	0.93719	1.91479	0.0220857	0.171271	19.3265	15.6687	37.0063	28.3621
ENSG00000130529	TRPM4	0.936176	1.91345	0.0282074	0.191672	36.5899	23.56	70.013	58.9857
ENSG00000267049	AC002398.1	0.933338	1.90969	0.00325359	0.0887271	0.717743	0.182321	1.37067	0.874372
ENSG00000166965	RCCD1	0.932923	1.90914	0.00147776	0.0681589	10.958	4.54479	20.9203	10.5871
ENSG00000132746	ALDH3B2	0.931418	1.90715	0.273676	0.552286	10.6681	17.5157	20.3456	41.8616
ENSG00000104814	MAP4K1	0.931293	1.90698	0.0186275	0.16145	11.2266	7.72978	21.4089	12.0112
ENSG00000186827	TNFRSF4	0.930851	1.9064	0.0219535	0.171124	5.23554	3.49801	9.98103	7.10195
ENSG00000134285	FKBP11	0.929948	1.90521	0.0297843	0.196647	53.1762	43.2454	101.312	72.3187
ENSG00000167657	DAPK3	0.929735	1.90493	0.000713669	0.0576882	36.5733	12.7003	69.6694	31.9256
ENSG00000205356	TECPR1	0.929717	1.9049	0.00163149	0.0695949	45.7277	22.0664	87.1068	45.6096
ENSG00000168397	ATG4B	0.928102	1.90277	7.7244e-05	0.0447752	48.1406	17.796	91.6004	31.4429
ENSG00000198807	PAX9	0.927754	1.90231	0.270061	0.549751	29.4875	65.0286	56.0945	97.5014
ENSG00000167302	TEPSIN	0.92746	1.90193	0.000682738	0.0576882	10.9266	5.21111	20.7816	7.73004
ENSG00000277054		0.927187	1.90156	0.146294	0.409441	0.345275	0.429602	0.656562	0.513288
ENSG00000227719	AC006042.1	0.926984	1.9013	0.0414981	0.229254	1.83344	1.40185	3.4859	1.85038
ENSG00000213722	DDAH2	0.926736	1.90097	0.0019246	0.072735	42.6177	15.3073	81.0151	49.8156
ENSG00000184545	DUSP8	0.926682	1.9009	0.0085937	0.121103	11.6392	8.40027	22.1249	8.1905
ENSG00000117525	F3	0.926674	1.90089	0.0701099	0.293237	68.3516	66.2718	129.929	118.306
ENSG00000110900	TSPAN11	0.926008	1.90001	0.185524	0.457653	17.0327	23.0072	32.3624	35.0796
ENSG00000211897	IGHG3	0.925255	1.89902	0.177452	0.449373	799.238	1187	1517.77	1284.62
ENSG00000234072	AC074117.1	0.924673	1.89825	0.00162457	0.0695949	5.60988	2.45181	10.649	5.06129
ENSG00000100023	PPIL2	0.924479	1.898	0.000337042	0.0576882	48.2546	18.4325	91.5871	38.4219
ENSG00000169660	HEXD	0.924405	1.8979	0.00682575	0.111956	24.4924	16.4178	46.4842	26.4135
ENSG00000165458	INPPL1	0.92363	1.89688	0.00510077	0.101301	144.4	72.7235	273.909	195.48
ENSG00000125740	FOSB	0.922149	1.89494	0.271163	0.550574	57.6107	129.242	109.169	130.659
ENSG00000109046	WSB1	0.922136	1.89492	0.0141233	0.144486	247.416	146.611	468.833	343.606
ENSG00000142512	SIGLEC10	0.920859	1.89324	0.059452	0.27011	10.4419	7.32485	19.7691	22.1951
ENSG00000144837	PLA1A	0.920774	1.89313	0.180422	0.452902	6.49585	9.3822	12.2975	20.1442
ENSG00000120875	DUSP4	0.920113	1.89226	0.128032	0.386989	67.8335	106.761	128.359	139.938
ENSG00000216775	AL109918.1	0.916419	1.88742	0.0501416	0.249849	5.70296	6.46104	10.7639	7.58129
ENSG00000139190	VAMP1	0.916247	1.8872	0.00547955	0.102763	7.80005	5.36674	14.7203	4.79794
ENSG00000204388	HSPA1B	0.9155	1.88622	0.0195689	0.163683	72.4358	29.4844	136.63	156.099
ENSG00000007392	LUC7L	0.914766	1.88526	0.00140418	0.06665	35.2271	24.2244	66.4123	24.9444
ENSG00000168096	ANKS3	0.912152	1.88185	0.00599879	0.105637	16.2798	12.3342	30.6362	12.9484
ENSG00000084207	GSTP1	0.911449	1.88093	0.0190112	0.162356	531.414	216.149	999.555	740.673
ENSG00000186185	KIF18B	0.911218	1.88063	0.0345096	0.210651	10.5688	7.6348	19.8761	10.5496
ENSG00000105472	CLEC11A	0.911027	1.88038	0.00842901	0.120237	7.4223	4.11082	13.9568	6.60873
ENSG00000182511	FES	0.910897	1.88021	0.00532689	0.102212	24.8244	10.4154	46.6751	37.0852
ENSG00000205517	RGL3	0.910563	1.87978	0.0272572	0.189417	29.0442	29.1988	54.5966	27.2525
ENSG00000175592	FOSL1	0.90915	1.87794	0.254244	0.533981	9.03343	10.9968	16.9642	41.9183
ENSG00000013573	DDX11	0.908794	1.87748	0.0138996	0.143687	20.833	15.2657	39.1135	21.5315
ENSG00000088992	TESC	0.908623	1.87725	0.368486	0.636755	73.9694	160.026	138.859	248.128
ENSG00000163520	FBLN2	0.908288	1.87682	0.0865494	0.323934	50.5034	42.5141	94.7856	106.486
ENSG00000198888	MT-ND1	0.907256	1.87547	0.0411745	0.228287	2332.96	1503.13	4375.41	4201.07
ENSG00000104852	SNRNP70	0.905718	1.87348	0.000825738	0.0608328	137.04	78.7664	256.741	73.3427
ENSG00000182272	B4GALNT4	0.905266	1.87289	0.183882	0.45665	14.7119	17.4094	27.5538	21.1343
ENSG00000137343	ATAT1	0.905224	1.87283	0.000345636	0.0576882	10.7593	5.64422	20.1503	4.43283
ENSG00000270761	AL355353.2	0.904599	1.87202	0.0739494	0.299816	0.993032	0.945055	1.85898	2.10531
ENSG00000244486	SCARF2	0.90447	1.87186	0.00637587	0.108661	7.9957	4.21836	14.9668	8.3844
ENSG00000161888	SPC24	0.904235	1.87155	0.0398674	0.224952	8.62248	6.03683	16.1374	11.2517
ENSG00000061938	TNK2	0.903341	1.87039	0.00210549	0.0747696	44.0613	20.9636	82.4119	34.5795
ENSG00000169696	ASPSCR1	0.903241	1.87026	0.0107699	0.130277	36.9773	20.5331	69.1573	57.7748
ENSG00000173762	CD7	0.903138	1.87013	0.0281592	0.191456	9.47556	6.36694	17.7205	11.8486
ENSG00000275342	PRAG1	0.90237	1.86913	0.00336732	0.088904	21.1862	7.51057	39.5998	23.4684
ENSG00000132635	PCED1A	0.900333	1.8665	0.00431089	0.0964976	29.3147	19.3645	54.7159	22.3126
ENSG00000166532	RIMKLB	0.899982	1.86604	0.0915342	0.334524	25.5468	15.9092	47.6715	83.9791
ENSG00000108187	PBLD	0.899199	1.86503	0.0931442	0.336756	10.0722	10.2599	18.785	24.7144
ENSG00000131584	ACAP3	0.898845	1.86457	0.00194668	0.0730946	39.033	18.731	72.7799	36.5651
ENSG00000171564	FGB	0.897916	1.86337	0.563257	0.779215	93.5533	305.881	174.325	550.396
ENSG00000129009	ISLR	0.895993	1.86089	0.0236819	0.177044	50.5018	35.9327	93.9783	55.5583
ENSG00000185442	FAM174B	0.895979	1.86087	0.0357188	0.214534	37.9946	31.9333	70.7031	44.5264
ENSG00000142731	PLK4	0.895929	1.86081	0.0269225	0.18806	8.69465	4.07764	16.1791	14.068
ENSG00000133315	MACROD1	0.895387	1.86011	0.037551	0.21822	15.8889	13.728	29.5551	25.5682
ENSG00000273478		0.894416	1.85886	0.0086661	0.121681	2.14593	1.20943	3.98898	1.83741
ENSG00000182087	TMEM259	0.894344	1.85877	0.000546305	0.0576882	88.4923	35.4915	164.486	62.2534
ENSG00000054967	RELT	0.893343	1.85748	0.00527759	0.102212	11.3392	5.27517	21.0623	14.9441
ENSG00000013725	CD6	0.893315	1.85744	0.0239312	0.1776	13.2152	9.39769	24.5463	17.1417
ENSG00000128218	VPREB3	0.893237	1.85734	0.129985	0.388845	1.45744	1.65102	2.70697	2.14737
ENSG00000077684	JADE1	0.89217	1.85597	0.0158411	0.152894	35.1356	12.5251	65.2104	56.5343
ENSG00000074855	ANO8	0.891938	1.85567	0.018386	0.16055	16.7087	9.97024	31.0058	27.0322
ENSG00000123342	MMP19	0.891842	1.85554	0.104483	0.352617	16.8456	19.7803	31.2577	32.0995
ENSG00000247092	SNHG10	0.891577	1.8552	0.0103155	0.128645	3.04478	1.88927	5.64869	2.63937
ENSG00000182768	NGRN	0.891211	1.85473	0.0150722	0.149184	36.4373	10.5963	67.5814	81.6646
ENSG00000167962	ZNF598	0.889705	1.8528	0.000273974	0.0575437	35.4432	13.9097	65.669	20.6434
ENSG00000146094	DOK3	0.889665	1.85275	0.0120905	0.136106	13.0298	8.95177	24.1409	11.6856
ENSG00000164674	SYTL3	0.889154	1.85209	0.0207523	0.167864	18.6723	7.76623	34.5828	39.5272
ENSG00000233999	IGKV3OR2-268	0.887121	1.84948	0.244308	0.523576	1.4918	2.02008	2.75906	3.62245
ENSG00000178188	SH2B1	0.886361	1.84851	0.00544756	0.102763	46.8496	34.4195	86.6018	26.034
ENSG00000129932	DOHH	0.88456	1.8462	0.00389268	0.0930459	8.79121	4.21574	16.2303	6.73826
ENSG00000139631	CSAD	0.883732	1.84514	0.0289044	0.193804	14.7858	14.433	27.2819	10.1484
ENSG00000105639	JAK3	0.882771	1.84391	0.0143562	0.145437	25.6164	13.9625	47.2344	30.2199
ENSG00000004468	CD38	0.882133	1.8431	0.0961366	0.342106	15.9995	13.7566	29.4887	25.2133
ENSG00000166578	IQCD	0.880294	1.84075	0.0895988	0.33046	6.26604	4.81281	11.5342	16.6237
ENSG00000137868	STRA6	0.879893	1.84024	0.274274	0.552822	26.89	58.7382	49.484	53.9487
ENSG00000257704	INAFM1	0.879758	1.84007	0.00388197	0.0930459	6.6596	4.11069	12.2541	4.67589
ENSG00000279088	AC022400.8	0.879383	1.83959	0.0237859	0.177181	4.74294	3.01319	8.72505	8.97578
ENSG00000213937	CLDN9	0.87907	1.83919	0.163183	0.430908	4.64101	5.46487	8.5357	8.00703
ENSG00000174807	CD248	0.87817	1.83804	0.00784752	0.117147	18.21	12.2855	33.4708	14.3706
ENSG00000151332	MBIP	0.877623	1.83735	0.116872	0.369772	98.6009	46.5786	181.164	340.136
ENSG00000077150	NFKB2	0.876249	1.8356	0.000246254	0.0575437	55.3023	16.6292	101.513	40.5736
ENSG00000139266	MARCHF9	0.875991	1.83527	0.024765	0.180957	28.4731	13.3005	52.2558	61.2769
ENSG00000099337	KCNK6	0.875312	1.8344	0.013079	0.140589	22.1154	10.077	40.5686	30.8101
ENSG00000128563	PRKRIP1	0.873601	1.83223	0.00909281	0.122656	33.0941	15.2286	60.6361	44.0573
ENSG00000230715	AC018638.2	0.873061	1.83154	0.0214075	0.169282	5.31652	4.28011	9.73744	2.47269
ENSG00000088899	LZTS3	0.872958	1.83141	0.0183363	0.160435	45.0876	37.0014	82.574	39.8874
ENSG00000132386	SERPINF1	0.871972	1.83016	0.0372789	0.217749	99.3276	67.0387	181.786	138.467
ENSG00000263072	ZNF213-AS1	0.871001	1.82893	0.00446355	0.0967519	5.31484	2.9407	9.72048	4.53848
ENSG00000244165	P2RY11	0.870815	1.8287	0.00893088	0.122525	4.30062	2.34937	7.86452	4.94649
ENSG00000218891	ZNF579	0.870116	1.82781	0.0117107	0.134205	9.84558	6.22209	17.9958	10.3328
ENSG00000186635	ARAP1	0.869609	1.82717	0.00316099	0.0878137	118.632	44.8926	216.761	160.592
ENSG00000099899	TRMT2A	0.869132	1.82656	0.00239465	0.0792724	31.7623	13.2757	58.0159	30.422
ENSG00000053254	FOXN3	0.868406	1.82565	0.103571	0.351875	57.3914	32.473	104.776	215.418
ENSG00000125850	OVOL2	0.868188	1.82537	0.0080009	0.117717	9.11124	4.35936	16.6314	9.06953
ENSG00000205763	RP9P	0.868028	1.82517	0.0205852	0.167093	4.88151	2.25721	8.90957	6.82723
ENSG00000185347	TEDC1	0.867976	1.8251	0.0606332	0.273237	11.6878	14.3829	21.3314	13.9336
ENSG00000252817		0.867348	1.82431	0.0784207	0.308487	0.318129	0.29002	0.580364	0.278364
ENSG00000255284	AP006621.3	0.866856	1.82368	0.0273681	0.189735	2.09383	1.5714	3.81849	2.7276
ENSG00000249859	PVT1	0.866834	1.82366	0.0332711	0.207163	15.0806	6.3825	27.5017	24.8214
ENSG00000184785	SMIM10	0.86499	1.82133	0.0879652	0.326959	4.10137	2.60913	7.46993	10.5631
ENSG00000019186	CYP24A1	0.864446	1.82064	0.323308	0.597256	39.8185	56.24	72.4952	109.263
ENSG00000128228	SDF2L1	0.864055	1.82015	0.00547062	0.102763	27.2151	13.8107	49.5354	25.1511
ENSG00000225855	RUSC1-AS1	0.863426	1.81935	0.0134473	0.142158	6.39212	4.31339	11.6295	5.7686
ENSG00000104936	DMPK	0.863226	1.8191	0.00370182	0.0922657	23.0962	13.55	42.0143	17.0791
ENSG00000154319	FAM167A	0.863057	1.81889	0.216169	0.492602	13.2075	14.1659	24.0229	38.3827
ENSG00000248367	AC008610.1	0.862942	1.81874	0.0593536	0.269774	0.70156	0.67756	1.27596	0.944614
ENSG00000204564	C6orf136	0.862611	1.81833	0.0032409	0.0887271	11.3513	4.2978	20.6404	14.0618
ENSG00000182472	CAPN12	0.862552	1.81825	0.14201	0.40374	11.3544	12.1539	20.6451	15.1948
ENSG00000176155	CCDC57	0.861561	1.817	0.00549496	0.102763	34.497	21.7797	62.6811	33.0616
ENSG00000162772	ATF3	0.860761	1.816	0.106707	0.356508	43.8523	50.2938	79.6356	60.5471
ENSG00000163795	ZNF513	0.859494	1.8144	0.00114138	0.0631256	17.3283	7.03144	31.4405	14.5079
ENSG00000227507	LTB	0.859358	1.81423	0.0975965	0.34425	15.2283	13.8309	27.6276	23.4532
ENSG00000102038	SMARCA1	0.857874	1.81237	0.0341549	0.209574	66.0129	35.9409	119.64	93.6408
ENSG00000172932	ANKRD13D	0.857459	1.81184	0.0010098	0.0611243	38.7909	16.2507	70.2831	27.0577
ENSG00000175643	RMI2	0.8573	1.81164	0.0135983	0.142538	12.6742	5.93347	22.9611	14.0506
ENSG00000137411	VARS2	0.85713	1.81143	0.000519396	0.0576882	28.8066	8.40109	52.1811	25.2774
ENSG00000213886	UBD	0.855896	1.80988	0.162688	0.430579	9.50517	10.325	17.2032	20.6652
ENSG00000120832	MTERF2	0.855565	1.80947	0.00371387	0.0922657	9.01453	3.02022	16.3115	10.6921
ENSG00000099624	ATP5F1D	0.854673	1.80835	0.00550897	0.102763	36.4103	14.9211	65.8425	39.3821
ENSG00000211679	IGLC3	0.854527	1.80817	0.283951	0.562778	252.563	450.514	456.675	537.443
ENSG00000170801	HTRA3	0.854478	1.8081	0.0688016	0.290146	48.9825	39.6448	88.5655	69.2874
ENSG00000172943	PHF8	0.853787	1.80724	0.0442971	0.234725	51.6676	23.4216	93.3757	136.42
ENSG00000266402	SNHG25	0.853036	1.8063	0.0985801	0.345625	0.598132	0.549803	1.08041	1.23328
ENSG00000213339	QTRT1	0.852973	1.80622	0.00791849	0.117266	25.3387	14.4589	45.7672	27.0522
ENSG00000225972	MTND1P23	0.852906	1.80614	0.47714	0.721568	56.6762	105.09	102.365	122.985
ENSG00000140853	NLRC5	0.852414	1.80552	0.00386436	0.0930459	46.1807	23.8481	83.3802	39.787
ENSG00000177192	PUS1	0.851923	1.80491	0.00193559	0.0729137	20.5945	8.92885	37.1712	19.1475
ENSG00000070404	FSTL3	0.850954	1.80369	0.0172133	0.157025	22.3694	12.78	40.3476	24.2455
ENSG00000124772	CPNE5	0.850131	1.80266	0.0925548	0.335845	8.95009	8.88985	16.134	10.7078
ENSG00000100726	TELO2	0.849926	1.80241	0.0047435	0.0988129	35.3778	17.6793	63.7652	34.9495
ENSG00000124785	NRN1	0.849188	1.80149	0.178157	0.450099	7.6473	5.85018	13.7765	30.5729
ENSG00000128965	CHAC1	0.849054	1.80132	0.0296407	0.195921	4.49567	2.95063	8.09813	6.34193
ENSG00000172009	THOP1	0.846292	1.79787	0.000699699	0.0576882	29.7568	10.6229	53.499	22.0824
ENSG00000164308	ERAP2	0.846176	1.79773	0.17393	0.444459	26.7623	36.766	48.1114	42.5046
ENSG00000044090	CUL7	0.845683	1.79712	0.00096556	0.0611243	56.7513	19.6593	101.989	48.0211
ENSG00000100985	MMP9	0.844417	1.79554	0.0903587	0.33179	47.5371	34.7433	85.3547	76.736
ENSG00000110448	CD5	0.844039	1.79507	0.0455616	0.237819	9.34088	7.25761	16.7675	12.1576
ENSG00000139193	CD27	0.844034	1.79506	0.0994571	0.345671	8.7938	7.46506	15.7854	11.9283
ENSG00000149016	TUT1	0.843729	1.79468	0.00140858	0.06665	13.3562	5.23528	23.9702	11.2929
ENSG00000005844	ITGAL	0.843138	1.79395	0.0552839	0.261375	30.1915	31.5298	54.162	33.9182
ENSG00000131037	EPS8L1	0.843023	1.79381	0.0985495	0.345625	37.3164	37.1005	66.9383	52.7793
ENSG00000186973	FAM183A	0.842897	1.79365	0.227854	0.505718	2.214	3.96316	3.97114	3.70741
ENSG00000178498	DTX3	0.84251	1.79317	0.0134987	0.142158	28.8378	15.2056	51.711	42.015
ENSG00000123329	ARHGAP9	0.842294	1.7929	0.0153431	0.150259	12.7486	6.9243	22.8569	12.0592
ENSG00000165644	COMTD1	0.841876	1.79238	0.0990061	0.345671	13.9492	13.3427	25.0022	31.4464
ENSG00000274576	IGHV2-70	0.841383	1.79177	0.365311	0.634091	13.0548	17.5181	23.3912	39.5572
ENSG00000110200	ANAPC15	0.840474	1.79064	0.00212064	0.0747696	9.66035	3.37283	17.2982	10.1968
ENSG00000241351	IGKV3-11	0.839028	1.78884	0.257216	0.537618	272.654	343.53	487.736	505.112
ENSG00000160972	PPP1R16A	0.838946	1.78874	0.0195188	0.163683	27.0026	14.6027	48.3007	36.6364
ENSG00000026297	RNASET2	0.83885	1.78862	0.012226	0.136709	53.3706	22.8677	95.4599	83.2349
ENSG00000103335	PIEZO1	0.83829	1.78793	0.00722482	0.113477	86.7736	39.9132	155.145	77.1737
ENSG00000004534	RBM6	0.83729	1.78669	0.00385706	0.0930459	64.1938	31.3481	114.694	49.3931
ENSG00000104522	TSTA3	0.835959	1.78504	0.0237329	0.177181	93.6139	50.0744	167.105	131.766
ENSG00000167757	KLK11	0.835315	1.78425	0.423145	0.68228	25.7997	49.4635	46.033	88.7851
ENSG00000178028	DMAP1	0.835263	1.78418	0.00140292	0.06665	32.6464	12.6281	58.247	26.7715
ENSG00000174669	SLC29A2	0.834797	1.78361	0.0273673	0.189735	26.3492	18.2439	46.9966	26.1098
ENSG00000104957	CCDC130	0.834738	1.78353	0.000671291	0.0576882	17.7707	7.09167	31.6947	11.0702
ENSG00000211670	IGLV3-9	0.834495	1.78323	0.366109	0.634702	17.9914	42.7943	32.0829	41.4683
ENSG00000053747	LAMA3	0.834229	1.7829	0.139247	0.400405	34.6931	38.6766	61.8545	49.8021
ENSG00000152284	TCF7L1	0.833116	1.78153	0.102869	0.351182	19.8561	15.391	35.3742	45.4228
ENSG00000099904	ZDHHC8	0.831915	1.78005	0.0168524	0.155192	34.1418	17.1585	60.7741	51.9565
ENSG00000226696	LENG8-AS1	0.831523	1.77956	0.0296021	0.195921	2.44581	1.59658	4.35247	3.14285
ENSG00000160949	TONSL	0.83108	1.77902	0.0126103	0.138787	19.6728	10.2274	34.9982	20.0807
ENSG00000104897	SF3A2	0.830387	1.77816	0.000869693	0.0609687	46.5079	15.4836	82.6986	38.1205
ENSG00000133265	HSPBP1	0.829615	1.77721	0.00482331	0.0993649	33.6737	13.7605	59.8453	34.2336
ENSG00000059145	UNKL	0.828287	1.77558	0.00232377	0.0784018	13.8283	6.91114	24.5532	7.6069
ENSG00000105963	ADAP1	0.827864	1.77506	0.0574143	0.265246	12.2555	10.9913	21.7542	16.8336
ENSG00000150401	DCUN1D2	0.827063	1.77407	0.000823815	0.0608328	9.42045	3.55024	16.7125	5.39983
ENSG00000121039	RDH10	0.825363	1.77198	0.147358	0.410802	118.31	100.141	209.644	319.024
ENSG00000071655	MBD3	0.824235	1.7706	0.000661573	0.0576882	46.9778	17.6755	83.1788	29.43
ENSG00000126790	L3HYPDH	0.824044	1.77036	0.0346679	0.211023	6.82122	5.99689	12.076	7.43768
ENSG00000147459	DOCK5	0.823707	1.76995	0.0233165	0.175552	41.7413	29.0062	73.8799	42.3813
ENSG00000188290	HES4	0.823499	1.76969	0.094706	0.338672	6.14675	4.77287	10.8779	9.55614
ENSG00000183615	FAM167B	0.823359	1.76952	0.0228224	0.173516	3.52747	2.24461	6.24193	3.12937
ENSG00000164880	INTS1	0.82232	1.76825	0.00800961	0.117717	151.015	68.3793	267.032	188.719
ENSG00000105664	COMP	0.822196	1.7681	0.198474	0.472247	28.6957	32.6627	50.7367	45.1732
ENSG00000163482	STK36	0.821923	1.76776	0.00270118	0.0834402	25.66	13.1976	45.3606	12.8821
ENSG00000263272	AC004148.1	0.820952	1.76657	0.0467663	0.240974	3.64722	4.17679	6.44307	1.85391
ENSG00000099949	LZTR1	0.819896	1.76528	0.00179437	0.0720224	44.9845	14.0855	79.4101	45.903
ENSG00000170581	STAT2	0.819215	1.76445	0.000130298	0.0487509	107.296	34.9091	189.317	42.6091
ENSG00000163945	UVSSA	0.818103	1.76309	0.029388	0.195696	16.4421	11.615	28.9888	15.8013
ENSG00000175567	UCP2	0.817871	1.7628	0.0188404	0.161718	176.834	68.4236	311.723	213.726
ENSG00000183160	TMEM119	0.816246	1.76082	0.0584024	0.267323	20.8363	12.4163	36.6889	27.4973
ENSG00000177548	RABEP2	0.816106	1.76065	0.00529013	0.102212	29.2778	17.7952	51.5479	18.9727
ENSG00000168062	BATF2	0.815838	1.76032	0.114735	0.367103	13.4469	6.86329	23.6709	44.7221
ENSG00000185189	NRBP2	0.815532	1.75995	0.0373768	0.21786	33.6529	30.0321	59.2274	29.2853
ENSG00000132821	VSTM2L	0.81513	1.75946	0.182342	0.455366	63.149	47.088	111.108	139.957
ENSG00000214274	ANG	0.813543	1.75752	0.181722	0.4545	14.6591	13.3735	25.7636	52.9051
ENSG00000156738	MS4A1	0.813514	1.75749	0.310189	0.586708	12.4075	18.1583	21.8061	19.5425
ENSG00000185404	SP140L	0.81306	1.75693	0.00320526	0.0884106	24.1692	10.0313	42.4637	21.3828
ENSG00000186166	CCDC84	0.811521	1.75506	0.0212468	0.168929	22.7603	17.5218	39.9458	16.8426
ENSG00000242294	STAG3L5P	0.811365	1.75487	0.0367531	0.216892	6.41961	5.20833	11.2656	5.06751
ENSG00000198786	MT-ND5	0.810117	1.75335	0.0309837	0.200075	2017.36	1339.38	3537.14	1799.57
ENSG00000179967	PPP1R14BP3	0.808696	1.75163	0.0418384	0.229684	11.5294	5.80938	20.1952	16.65
ENSG00000250318	AC003072.1	0.808051	1.75084	0.0257297	0.184759	1.26164	0.777695	2.20894	0.942885
ENSG00000149499	EML3	0.806865	1.74941	0.00134866	0.0662588	43.8851	19.5382	76.7729	30.0191
ENSG00000272990	AC084036.1	0.804998	1.74714	0.0419552	0.229708	1.25578	0.864736	2.19403	1.64155
ENSG00000135722	FBXL8	0.804801	1.7469	0.0840468	0.318964	10.499	12.0302	18.3407	14.1577
ENSG00000165178	NCF1C	0.80464	1.74671	0.0686316	0.290146	2.78944	2.07616	4.87235	3.6408
ENSG00000169136	ATF5	0.803719	1.74559	0.0131229	0.140589	37.8972	22.9045	66.1532	33.8801
ENSG00000135506	OS9	0.803658	1.74552	0.023756	0.177181	295.187	89.153	515.255	642.098
ENSG00000229314	ORM1	0.803567	1.74541	0.245447	0.524121	2.99579	3.17584	5.22889	7.39909
ENSG00000238279	BX470102.1	0.803155	1.74491	0.151613	0.416417	1.36725	1.07382	2.38573	2.4444
ENSG00000179979		0.802803	1.74449	0.064632	0.280192	12.6332	10.5979	22.0384	16.7153
ENSG00000211896	IGHG1	0.80146	1.74286	0.297639	0.573174	9810.19	13243.7	17097.8	15810.9
ENSG00000125844	RRBP1	0.801241	1.7426	0.0261899	0.185958	379.005	258.602	660.454	325.151
ENSG00000240864	IGKV1-16	0.800948	1.74225	0.316017	0.592532	31.7489	49.8099	55.3143	76.4764
ENSG00000206630	SNORD60	0.800913	1.7422	0.152104	0.417112	0.172113	0.213713	0.299855	0.229031
ENSG00000079616	KIF22	0.800698	1.74194	0.00554167	0.102982	46.4338	16.3433	80.8851	44.9608
ENSG00000122254	HS3ST2	0.798223	1.73896	0.311806	0.588352	8.55279	12.9162	14.8729	22.7324
ENSG00000229807	XIST	0.797203	1.73773	0.596255	0.799845	85.0576	167.485	147.807	181.224
ENSG00000222365	SNORD12B	0.79641	1.73677	0.167104	0.436805	0.199253	0.224895	0.346057	0.263808
ENSG00000258297		0.794873	1.73492	0.0144796	0.145798	9.26334	6.32388	16.0712	5.55508
ENSG00000146067	FAM193B	0.793897	1.73375	0.0107402	0.130089	31.4858	25.297	54.5886	19.8421
ENSG00000159214	CCDC24	0.793665	1.73347	0.0127208	0.13931	16.0747	8.37848	27.8651	18.7288
ENSG00000163660	CCNL1	0.793428	1.73319	0.00266122	0.0826043	72.6602	30.4403	125.934	51.2298
ENSG00000181404	WASHC1	0.793176	1.73288	0.0267752	0.187975	3.58973	2.37005	6.2206	3.7671
ENSG00000147813	NAPRT	0.791267	1.73059	0.065608	0.282948	39.1215	22.5614	67.7034	62.3908
ENSG00000273145	BX537318.1	0.790204	1.72932	0.028978	0.193804	2.0605	0.983566	3.56326	2.62024
ENSG00000276529	AP001505.1	0.789628	1.72863	0.0628791	0.277351	0.98734	0.874144	1.70675	1.12067
ENSG00000124212	PTGIS	0.789298	1.72823	0.117452	0.370701	15.8767	11.5557	27.4387	25.2763
ENSG00000137713	PPP2R1B	0.789061	1.72795	0.0337256	0.208815	42.2475	16.3181	73.0016	77.9029
ENSG00000171246	NPTX1	0.788688	1.7275	0.399914	0.664539	33.2945	61.7891	57.5164	119.872
ENSG00000140474	ULK3	0.788632	1.72744	0.0037735	0.0928661	35.2988	16.5009	60.9765	29.7945
ENSG00000105289	TJP3	0.788563	1.72735	0.102759	0.350972	40.8396	31.7783	70.5445	70.593
ENSG00000183397	C19orf71	0.788551	1.72734	0.066675	0.285872	1.28183	1.08123	2.21416	1.11289
ENSG00000182492	BGN	0.78836	1.72711	0.0189967	0.162351	383.325	278.211	662.045	262.398
ENSG00000077463	SIRT6	0.785529	1.72372	0.000815397	0.0608328	14.9792	3.91779	25.82	10.2307
ENSG00000197483	ZNF628	0.784995	1.72309	0.0147103	0.147162	6.18624	3.51192	10.6594	5.69384
ENSG00000270189		0.784071	1.72198	0.0276645	0.190223	3.98059	3.01486	6.85451	3.04986
ENSG00000271745		0.783842	1.72171	0.0672127	0.287125	0.192215	0.121911	0.330939	0.226939
ENSG00000107968	MAP3K8	0.783283	1.72104	0.0227588	0.173486	17.0934	9.26412	29.4185	19.0462
ENSG00000185043	CIB1	0.782927	1.72062	0.0885299	0.327972	178.676	110.262	307.433	356.586
ENSG00000204536	CCHCR1	0.782495	1.7201	0.0076175	0.115981	24.7131	13.9094	42.509	21.6753
ENSG00000163734	CXCL3	0.782427	1.72002	0.202638	0.477085	5.41093	5.76	9.30691	10.6926
ENSG00000076928	ARHGEF1	0.782134	1.71967	0.00336364	0.088904	103.874	56.6066	178.629	70.9198
ENSG00000110583	NAA40	0.781711	1.71917	0.00240323	0.0792724	29.2379	14.1393	50.2648	20.33
ENSG00000007516	BAIAP3	0.781349	1.71874	0.0216823	0.170354	14.5803	7.98781	25.0598	14.6349
ENSG00000176170	SPHK1	0.781311	1.71869	0.118389	0.372746	13.8291	12.035	23.7679	25.8316
ENSG00000211593	IGKJ5	0.781112	1.71845	0.342268	0.614863	0.851077	1.29889	1.46254	1.64395
ENSG00000124222	STX16	0.78098	1.7183	0.00136887	0.0663904	67.8158	27.3725	116.528	50.5772
ENSG00000231587	SNORD62B	0.780885	1.71818	0.100747	0.347531	0.20438	0.193835	0.351163	0.161647
ENSG00000167513	CDT1	0.779703	1.71678	0.0557375	0.262066	15.3489	10.6356	26.3507	14.3211
ENSG00000137265	IRF4	0.779669	1.71674	0.170507	0.440185	12.4622	12.3121	21.3944	22.0117
ENSG00000106483	SFRP4	0.77908	1.71604	0.109645	0.359516	44.8961	32.327	77.0434	72.215
ENSG00000226210	WASH8P	0.778692	1.71557	0.0249093	0.181457	10.2324	6.38823	17.5544	9.67511
ENSG00000142871	CCN1	0.778315	1.71513	0.11894	0.373559	157.509	105.022	270.149	268.554
ENSG00000204389	HSPA1A	0.778179	1.71497	0.099433	0.345671	66.3361	34.8559	113.764	155.329
ENSG00000104885	DOT1L	0.778134	1.71491	0.0018992	0.072481	26.6156	12.1809	45.6433	12.7725
ENSG00000147003	CLTRN	0.777835	1.71456	0.202516	0.47699	3.25764	3.35706	5.58541	5.8311
ENSG00000099251	HSD17B7P2	0.777643	1.71433	0.0182265	0.160335	2.43423	1.27116	4.17307	1.86231
ENSG00000089356	FXYD3	0.776483	1.71295	0.260505	0.541191	63.5986	72.9788	108.941	116.932
ENSG00000129038	LOXL1	0.775799	1.71214	0.0169147	0.155519	22.0227	10.7301	37.7058	18.9953
ENSG00000269867	AC010326.3	0.774706	1.71084	0.00745199	0.114676	2.6044	1.08267	4.45572	1.87609
ENSG00000094914	AAAS	0.774276	1.71033	0.000298681	0.0575437	33.1209	11.2425	56.6478	16.8788
ENSG00000206573	THUMPD3-AS1	0.774033	1.71004	0.0341301	0.209574	14.6726	8.63028	25.0907	24.133
ENSG00000168961	LGALS9	0.773502	1.70941	0.0110173	0.130555	59.1089	26.2332	101.042	57.4995
ENSG00000278784	AL136295.7	0.772973	1.70879	0.0190891	0.162746	2.47636	1.2656	4.23157	2.54937
ENSG00000023892	DEF6	0.772795	1.70858	0.00808114	0.11793	24.1506	9.88105	41.2631	22.8221
ENSG00000078804	TP53INP2	0.772673	1.70843	0.0346988	0.211023	44.62	29.5686	76.2303	55.1446
ENSG00000169249	ZRSR2	0.771842	1.70745	0.000813912	0.0608328	9.88392	3.55559	16.8763	5.39574
ENSG00000275494	AC133552.5	0.771806	1.70741	0.0884643	0.327938	1.21888	0.7999	2.08113	1.76984
ENSG00000070423	RNF126	0.770807	1.70622	0.00187318	0.072481	24.2622	8.31626	41.3968	16.7094
ENSG00000254815	LMNTD2-AS1	0.770169	1.70547	0.299903	0.575766	7.62716	15.4772	13.0079	19.9981
ENSG00000125910	S1PR4	0.77001	1.70528	0.0385083	0.220589	4.60651	2.9103	7.85539	4.64584
ENSG00000076382	SPAG5	0.7698	1.70503	0.0378069	0.218984	27.4138	17.5634	46.7414	22.6138
ENSG00000179832	MROH1	0.769394	1.70455	0.00556389	0.102982	56.2678	29.6373	95.9115	37.1435
ENSG00000065268	WDR18	0.768022	1.70293	0.00819814	0.118837	23.4818	8.92905	39.9879	23.1212
ENSG00000175467	SART1	0.767811	1.70268	0.00349313	0.0898681	66.7757	29.0807	113.698	39.0481
ENSG00000119772	DNMT3A	0.767753	1.70262	0.00271634	0.0834535	49.0681	16.48	83.5442	42.4146
ENSG00000175602	CCDC85B	0.767437	1.70224	0.0653671	0.282642	13.1283	9.36068	22.3476	19.7722
ENSG00000165684	SNAPC4	0.766484	1.70112	0.0110743	0.130736	17.8139	9.53077	30.3035	12.041
ENSG00000263064		0.766265	1.70086	0.0279817	0.190807	0.662919	0.373108	1.12753	0.585542
ENSG00000129347	KRI1	0.766215	1.7008	0.000176394	0.0540323	25.9202	7.46312	44.0852	11.4486
ENSG00000115738	ID2	0.765907	1.70044	0.109111	0.359177	36.6304	27.5018	62.2877	69.4105
ENSG00000237643	AL365226.1	0.765884	1.70041	0.54668	0.768794	6.20581	11.1259	10.5524	28.3997
ENSG00000133216	EPHB2	0.765829	1.70035	0.115054	0.367701	29.3194	19.4087	49.8531	44.5682
ENSG00000104894	CD37	0.764531	1.69882	0.0384527	0.220523	28.2607	18.5063	48.0098	29.9318
ENSG00000118523	CCN2	0.764237	1.69847	0.0535649	0.257749	129.202	76.0197	219.446	181.058
ENSG00000140398	NEIL1	0.763422	1.69751	0.0897132	0.330776	15.6291	14.9197	26.5306	18.5612
ENSG00000204348	DXO	0.762878	1.69687	0.00564644	0.103291	13.6588	6.54742	23.1773	9.90446
ENSG00000127564	PKMYT1	0.762513	1.69644	0.0725301	0.297062	11.4339	8.90269	19.397	10.569
ENSG00000107317	PTGDS	0.761978	1.69581	0.161788	0.429425	52.901	49.4506	89.7102	71.8106
ENSG00000242371	IGKV1-39	0.761775	1.69557	0.405302	0.668629	3.75534	7.536	6.36746	9.66058
ENSG00000162174	ASRGL1	0.760621	1.69422	0.189905	0.462543	23.8106	25.5034	40.3404	40.5235
ENSG00000164638	SLC29A4	0.760437	1.694	0.121148	0.376846	21.4239	21.6946	36.2921	28.7848
ENSG00000198695	MT-ND6	0.758039	1.69119	0.052095	0.254558	732.435	538.347	1238.69	634.732
ENSG00000165171	METTL27	0.758016	1.69116	0.0976557	0.34425	6.3174	5.66166	10.6838	8.30354
ENSG00000129968	ABHD17A	0.758001	1.69115	0.00140091	0.06665	25.2779	10.0206	42.7486	12.8328
ENSG00000125967	NECAB3	0.757578	1.69065	0.0213973	0.169282	41.6552	17.6409	70.4244	59.6286
ENSG00000221821	C6orf226	0.757513	1.69057	0.0504999	0.250426	3.82594	2.4026	6.46804	4.1207
ENSG00000132680	KHDC4	0.757021	1.69	0.00372734	0.0923112	47.9431	24.714	81.0238	32.8557
ENSG00000102096	PIM2	0.756928	1.68989	0.109852	0.359704	79.6487	67.959	134.597	98.0933
ENSG00000226396	AL031727.1	0.756611	1.68952	0.0536491	0.257941	0.802112	0.656872	1.35518	0.96927
ENSG00000065357	DGKA	0.755254	1.68793	0.00441983	0.0967469	26.1273	9.5214	44.101	18.0469
ENSG00000271870	AC024060.2	0.755163	1.68782	0.0278553	0.190503	1.3073	0.930479	2.20649	0.753689
ENSG00000162063	CCNF	0.754537	1.68709	0.0267587	0.187973	16.8457	8.2157	28.4203	19.7922
ENSG00000131153	GINS2	0.754341	1.68686	0.109673	0.359516	14.1089	10.7334	23.7997	23.7075
ENSG00000175581	MRPL48	0.753393	1.68575	0.0199966	0.165388	19.965	12.09	33.6561	24.2435
ENSG00000168243	GNG4	0.752138	1.68429	0.452558	0.705727	18.9851	31.5661	31.9763	48.5088
ENSG00000065057	NTHL1	0.752089	1.68423	0.0358671	0.214981	21.0839	10.9911	35.5101	27.8837
ENSG00000235245	AL360181.2	0.751399	1.68342	0.0222145	0.171926	1.23737	0.722892	2.08302	0.930597
ENSG00000106404	CLDN15	0.75099	1.68295	0.028828	0.193804	6.64907	5.15332	11.19	3.86757
ENSG00000162062	TEDC2	0.75096	1.68291	0.0815873	0.314458	6.67203	5.02321	11.2284	6.08179
ENSG00000197530	MIB2	0.749567	1.68129	0.032393	0.204587	29.7708	20.7462	50.0533	29.7703
ENSG00000130203	APOE	0.748571	1.68013	0.106729	0.356508	323.921	309.118	544.229	380.664
ENSG00000180902	D2HGDH	0.748171	1.67966	0.0624434	0.277137	22.9199	19.4115	38.4977	20.3717
ENSG00000078401	EDN1	0.747775	1.6792	0.129019	0.387604	15.7389	11.1615	26.4287	25.1144
ENSG00000003147	ICA1	0.747157	1.67848	0.0266244	0.187709	46.2681	29.5967	77.6603	45.4178
ENSG00000165949	IFI27	0.746029	1.67717	0.242008	0.521202	206.4	177.469	346.167	614.897
ENSG00000171236	LRG1	0.745637	1.67671	0.133684	0.392653	48.4231	36.9595	81.1916	81.7864
ENSG00000264991		0.745427	1.67647	0.0462309	0.239746	0.174105	0.114124	0.291882	0.12971
ENSG00000107742	SPOCK2	0.744926	1.67589	0.0923115	0.335407	50.3686	52.1959	84.4121	64.4832
ENSG00000122966	CIT	0.743883	1.67468	0.168978	0.438797	75.2368	79.0684	125.997	146.549
ENSG00000090238	YPEL3	0.743733	1.6745	0.0243153	0.17902	56.6664	33.8208	94.888	63.3209
ENSG00000160113	NR2F6	0.743733	1.6745	0.0279424	0.190706	48.5354	24.3738	81.2726	64.2124
ENSG00000281420	AP001052.1	0.742956	1.6736	0.128438	0.387188	0.237652	0.203506	0.397734	0.361057
ENSG00000167772	ANGPTL4	0.742886	1.67352	0.296873	0.572445	40.449	43.6333	67.6922	100.808
ENSG00000135919	SERPINE2	0.742517	1.67309	0.0977112	0.344297	17.5831	12.7058	29.4181	19.1972
ENSG00000257727	CNPY2	0.73925	1.66931	0.0110044	0.130555	32.8502	12.208	54.8372	32.2516
ENSG00000162227	TAF6L	0.739191	1.66924	0.00112044	0.0631256	9.95941	3.64006	16.6246	4.58629
ENSG00000167244	IGF2	0.7369	1.66659	0.339161	0.611972	37.4331	52.1548	62.3857	98.6714
ENSG00000123297	TSFM	0.736512	1.66614	0.0311642	0.200311	29.6911	11.1131	49.4697	49.1585
ENSG00000128191	DGCR8	0.734584	1.66392	0.00378719	0.0930019	31.1692	11.3065	51.863	23.5661
ENSG00000008710	PKD1	0.734155	1.66342	0.0108652	0.130555	47.0382	26.5225	78.2444	24.5134
ENSG00000185986	SDHAP3	0.734099	1.66336	0.122444	0.378653	14.4584	12.1999	24.0495	19.1568
ENSG00000104960	PTOV1	0.734015	1.66326	0.00219163	0.0756828	90.7464	35.7918	150.935	56.5387
ENSG00000196456	ZNF775	0.732993	1.66208	0.00803203	0.11785	13.1351	8.42403	21.8316	8.14008
ENSG00000140525	FANCI	0.732337	1.66133	0.0267469	0.187973	31.7094	16.336	52.6797	31.9261
ENSG00000141756	FKBP10	0.732258	1.66124	0.202751	0.477255	189.268	206.585	314.419	251.818
ENSG00000140443	IGF1R	0.732213	1.66119	0.063819	0.279163	61.4724	46.2783	102.117	58.692
ENSG00000141002	TCF25	0.731907	1.66083	0.000526848	0.0576882	95.6744	29.2716	158.899	48.1916
ENSG00000242125	SNHG3	0.731684	1.66058	0.019464	0.163683	27.4303	15.4583	45.5501	23.7918
ENSG00000161179	YDJC	0.730172	1.65884	0.0448284	0.235622	23.3283	14.7676	38.6978	26.7638
ENSG00000037042	TUBG2	0.729521	1.65809	0.0143418	0.145437	16.4102	10.5783	27.2095	12.3413
ENSG00000133624	ZNF767P	0.729322	1.65786	0.0263558	0.186721	10.4986	8.1843	17.4052	4.82339
ENSG00000183856	IQGAP3	0.729227	1.65775	0.0884091	0.327938	27.3804	22.6043	45.3898	25.1796
ENSG00000215041	NEURL4	0.728645	1.65708	0.00298555	0.0861716	19.4612	9.29523	32.2488	7.60611
ENSG00000168067	MAP4K2	0.728393	1.65679	0.0129171	0.139995	24.3644	13.0767	40.3667	19.3057
ENSG00000108176	DNAJC12	0.726091	1.65415	0.317032	0.593473	28.928	34.8495	47.8513	61.8539
ENSG00000177337	DLGAP1-AS1	0.725514	1.65349	0.0278834	0.190583	7.14359	3.36035	11.8119	7.67926
ENSG00000196843	ARID5A	0.724232	1.65202	0.0051945	0.102117	22.1492	9.19271	36.591	13.6917
ENSG00000130787	HIP1R	0.723301	1.65096	0.0224334	0.172587	58.8421	33.1435	97.1457	46.6549
ENSG00000125912	NCLN	0.723251	1.6509	0.000709396	0.0576882	66.2223	21.4947	109.326	30.0118
ENSG00000149541	B3GAT3	0.723222	1.65087	0.00635851	0.108617	39.2998	16.8665	64.8787	30.0174
ENSG00000179954	SSC5D	0.723104	1.65073	0.0747586	0.302044	17.6671	12.5907	29.1636	19.7044
ENSG00000273437	AC108673.3	0.722782	1.65036	0.0380949	0.219735	0.556643	0.336082	0.918662	0.454351
ENSG00000169683	LRRC45	0.721786	1.64922	0.0271636	0.18888	25.8488	13.6247	42.6305	27.1748
ENSG00000106624	AEBP1	0.721766	1.6492	0.0448371	0.235622	257.373	188.465	424.46	237.957
ENSG00000071894	CPSF1	0.721368	1.64874	0.00669533	0.110544	97.9264	42.7689	161.456	88.2672
ENSG00000088448	ANKRD10	0.720224	1.64744	0.00855751	0.120995	65.7285	37.5811	108.284	35.2893
ENSG00000108961	RANGRF	0.719861	1.64702	0.0720371	0.296085	10.4119	5.28204	17.1486	20.3984
ENSG00000141577	CEP131	0.719237	1.64631	0.0232524	0.17552	20.7825	11.6448	34.2144	14.9768
ENSG00000271895	AL109811.2	0.71893	1.64596	0.0598501	0.271248	1.87764	1.24192	3.09052	1.52454
ENSG00000167792	NDUFV1	0.7189	1.64593	0.0058581	0.105284	117.748	45.488	193.804	90.4004
ENSG00000167291	TBC1D16	0.718831	1.64585	0.0271311	0.188879	63.6657	29.3519	104.784	74.9924
ENSG00000137817	PARP6	0.718066	1.64498	0.000998707	0.0611243	43.6699	13.8268	71.836	23.8461
ENSG00000198821	CD247	0.718052	1.64496	0.0923233	0.335407	7.28126	5.69321	11.9774	7.68567
ENSG00000253047	AL356356.1	0.716928	1.64368	0.0933533	0.33694	0.231455	0.209997	0.380438	0.130977
ENSG00000205903	ZNF316	0.716709	1.64343	0.0518547	0.254032	43.7792	27.9094	71.948	49.5589
ENSG00000135480	KRT7	0.716484	1.64317	0.0849885	0.320807	472.308	435.511	776.084	429.029
ENSG00000179922	ZNF784	0.716444	1.64313	0.0129703	0.140051	6.36883	3.05119	10.4648	4.89812
ENSG00000240731	AL139287.1	0.715435	1.64198	0.024374	0.179326	2.41634	1.19146	3.96758	1.68383
ENSG00000111602	TIMELESS	0.715235	1.64175	0.0205497	0.166922	42.793	21.5852	70.2555	42.0898
ENSG00000188536	HBA2	0.714954	1.64143	0.246429	0.524874	3.86822	4.19517	6.34942	6.20963
ENSG00000149091	DGKZ	0.714953	1.64143	0.000577696	0.0576882	48.9777	14.777	80.3934	25.8579
ENSG00000111319	SCNN1A	0.713871	1.6402	0.0578482	0.266042	269.983	151.49	442.827	328.187
ENSG00000109846	CRYAB	0.713428	1.6397	0.124028	0.38072	7.41696	6.06652	12.1616	13.2476
ENSG00000100916	BRMS1L	0.713322	1.63958	0.14308	0.405467	15.1099	8.21092	24.7738	43.7688
ENSG00000211668	IGLV2-11	0.712774	1.63895	0.34484	0.616974	76.9151	113.199	126.06	134.4
ENSG00000011243	AKAP8L	0.712586	1.63874	0.00826284	0.119181	35.8257	20.1251	58.709	21.1814
ENSG00000253716	MINCR	0.711558	1.63757	0.0696225	0.292122	3.31501	2.61458	5.42856	3.78076
ENSG00000141295	SCRN2	0.710931	1.63686	0.039918	0.225119	24.3816	14.5721	39.9093	26.9434
ENSG00000142409	ZNF787	0.710482	1.63635	0.0208035	0.167986	28.5465	17.9583	46.7121	24.72
ENSG00000185885	IFITM1	0.710311	1.63616	0.237953	0.517618	133.601	93.2156	218.592	408.85
ENSG00000161328	LRRC56	0.710308	1.63615	0.103392	0.351589	7.14603	7.04868	11.692	8.03843
ENSG00000110888	CAPRIN2	0.710301	1.63615	0.0321566	0.203988	16.6502	8.79587	27.2421	15.9355
ENSG00000153391	INO80C	0.709977	1.63578	0.0348231	0.211556	9.59949	5.24742	15.7026	11.9306
ENSG00000167674	HDGFL2	0.709369	1.63509	0.0091656	0.122912	39.7186	18.2883	64.9435	26.209
ENSG00000172270	BSG	0.709039	1.63471	0.00911148	0.122656	485.901	149.516	794.309	391.903
ENSG00000242612	DECR2	0.708954	1.63462	0.077126	0.306189	21.9723	16.6909	35.9163	35.9372
ENSG00000092068	SLC7A8	0.70882	1.63447	0.220788	0.498173	46.6503	32.4894	76.2484	126.276
ENSG00000115129	TP53I3	0.708793	1.63444	0.0562322	0.262868	37.7064	18.4841	61.6287	50.8767
ENSG00000222937	SNORD63B	0.708679	1.63431	0.201398	0.475609	0.316989	0.323435	0.518057	0.298136
ENSG00000079462	PAFAH1B3	0.708659	1.63428	0.0740277	0.300029	35.7178	26.4056	58.3731	48.5223
ENSG00000132740	IGHMBP2	0.70857	1.63418	0.00095329	0.0609687	19.5397	5.96819	31.9315	9.363
ENSG00000178922	HYI	0.70775	1.63325	0.021958	0.171124	10.9465	6.73129	17.8785	9.29463
ENSG00000100450	GZMH	0.707375	1.63283	0.271835	0.550897	3.62381	4.62327	5.91706	7.63822
ENSG00000214517	PPME1	0.707341	1.63279	0.0428954	0.232681	65.336	26.7198	106.68	124.567
ENSG00000230177		0.706827	1.63221	0.0571682	0.264974	1.49663	0.96356	2.44282	1.45756
ENSG00000234912	SNHG20	0.705803	1.63105	0.00547617	0.102763	4.9853	2.32257	8.13128	2.07096
ENSG00000131591	C1orf159	0.705703	1.63094	0.0186424	0.16145	13.5311	7.12802	22.0684	11.3939
ENSG00000131116	ZNF428	0.704963	1.6301	0.00953681	0.12501	18.4169	8.69122	30.0214	13.3392
ENSG00000093009	CDC45	0.704577	1.62967	0.157247	0.425127	11.7154	11.457	19.0923	13.409
ENSG00000198089	SFI1	0.70431	1.62937	0.00852248	0.12083	23.4402	12.7257	38.1926	10.8833
ENSG00000143851	PTPN7	0.703999	1.62901	0.0583469	0.267312	14.518	8.12679	23.65	14.8306
ENSG00000171222	SCAND1	0.703551	1.62851	0.0406217	0.227313	44.106	23.5593	71.8271	47.8522
ENSG00000184730	APOBR	0.703061	1.62796	0.0496214	0.248118	12.6998	7.08607	20.6748	10.8436
ENSG00000198026	ZNF335	0.701679	1.6264	0.000670945	0.0576882	27.7788	9.30567	45.1793	9.70647
ENSG00000140511	HAPLN3	0.701554	1.62626	0.0521359	0.254558	16.4907	8.39157	26.8181	19.9599
ENSG00000148343	MIGA2	0.700487	1.62505	0.00863626	0.121555	19.7352	8.765	32.0708	12.3249
ENSG00000139508	SLC46A3	0.700317	1.62486	0.14897	0.413253	24.5623	16.24	39.9104	56.7021
ENSG00000184113	CLDN5	0.699241	1.62365	0.123322	0.379853	17.4196	13.2249	28.2833	20.2518
ENSG00000125846	ZNF133	0.699039	1.62342	0.0077595	0.116543	14.5221	6.85729	23.5756	8.26297
ENSG00000261236	BOP1	0.698892	1.62326	0.0356852	0.214534	53.5166	30.8034	86.8713	48.5407
ENSG00000110721	CHKA	0.698377	1.62268	0.0361015	0.215627	35.0746	20.4578	56.9148	39.1512
ENSG00000129911	KLF16	0.695743	1.61972	0.0289799	0.193804	18.2242	10.2674	29.518	12.1555
ENSG00000164050	PLXNB1	0.695585	1.61954	0.0704336	0.293815	67.1966	46.1659	108.828	40.1551
ENSG00000158863	FAM160B2	0.695297	1.61922	0.0163364	0.154041	55.048	29.4719	89.1347	37.6884
ENSG00000124466	LYPD3	0.695196	1.6191	0.236326	0.515683	10.7588	12.5353	17.4196	19.8849
ENSG00000129514	FOXA1	0.694335	1.61814	0.157161	0.425127	87.6677	84.0364	141.858	141.707
ENSG00000102125	TAZ	0.692554	1.61614	0.0107166	0.129938	28.1213	13.5578	45.4481	19.7757
ENSG00000122515	ZMIZ2	0.692419	1.61599	0.00660463	0.109591	144.222	55.9439	233.061	101.124
ENSG00000167895	TMC8	0.692162	1.6157	0.0386374	0.220804	28.8036	13.5581	46.538	26.7089
ENSG00000176597	B3GNT5	0.691604	1.61508	0.0598471	0.271248	31.5361	14.1849	50.9334	38.9464
ENSG00000261189	AL031058.1	0.691445	1.6149	0.189958	0.462577	2.12213	2.14735	3.42702	3.2958
ENSG00000147799	ARHGAP39	0.691022	1.61443	0.0252656	0.183235	15.5847	8.14603	25.1603	10.5793
ENSG00000259865	AL390728.6	0.69102	1.61442	0.00644083	0.10903	7.23561	2.69727	11.6813	4.47063
ENSG00000161960	EIF4A1	0.690949	1.61435	0.0187733	0.161718	9.28053	5.86531	14.982	4.17723
ENSG00000111057	KRT18	0.690606	1.61396	0.0214877	0.169801	490.683	273.967	791.943	318.069
ENSG00000159212	CLIC6	0.690269	1.61358	0.27918	0.557944	81.7068	89.4013	131.841	108.729
ENSG00000153443	UBALD1	0.689673	1.61292	0.00978636	0.12601	19.1911	11.5268	30.9537	12.9708
ENSG00000127324	TSPAN8	0.688718	1.61185	0.480608	0.723101	39.2512	64.904	63.2671	150.203
ENSG00000266074	BAHCC1	0.688706	1.61184	0.10124	0.348546	31.3674	23.9877	50.5591	34.9536
ENSG00000272153	AL365330.1	0.688143	1.61121	0.0613824	0.27491	1.16544	0.88315	1.87777	0.749999
ENSG00000265917	MIR3685	0.687905	1.61094	0.0700081	0.292917	0.349107	0.219758	0.562391	0.295337
ENSG00000244119	PDCL3P4	0.687369	1.61034	0.180727	0.453024	1.75971	1.82369	2.83375	2.42818
ENSG00000149131	SERPING1	0.686292	1.60914	0.0520706	0.254558	203.63	145.901	327.669	167.35
ENSG00000198276	UCKL1	0.68628	1.60913	0.00420526	0.0954176	33.4572	11.7473	53.8369	25.2376
ENSG00000168405	CMAHP	0.686063	1.60889	0.141945	0.40374	24.022	21.8734	38.6487	32.773
ENSG00000177084	POLE	0.685485	1.60824	0.0123312	0.137092	43.1851	20.347	69.452	29.2441
ENSG00000175445	LPL	0.684925	1.60762	0.335649	0.608844	32.852	47.0712	52.8134	75.9431
ENSG00000111199	TRPV4	0.684738	1.60741	0.129434	0.388103	9.09949	5.98391	14.6266	19.3266
ENSG00000173457	PPP1R14B	0.684712	1.60738	0.024927	0.181457	84.3261	31.6248	135.544	81.7309
ENSG00000169031	COL4A3	0.684497	1.60714	0.294161	0.570292	24.0663	21.3006	38.6779	46.7176
ENSG00000260279	AC137932.1	0.684475	1.60712	0.139889	0.401361	1.00404	0.818914	1.61362	1.1249
ENSG00000140678	ITGAX	0.683497	1.60603	0.0240047	0.1776	42.3993	27.98	68.0945	26.7896
ENSG00000134871	COL4A2	0.683442	1.60597	0.0100934	0.127681	286.531	124.559	460.16	176.236
ENSG00000106009	BRAT1	0.683271	1.60578	0.0124086	0.137746	60.9711	22.0988	97.9059	64.2625
ENSG00000187535	IFT140	0.683247	1.60575	0.0986104	0.345625	32.8265	25.5594	52.7112	45.8993
ENSG00000185989	RASA3	0.68319	1.60569	0.0368238	0.216936	16.2434	10.1612	26.0819	11.4039
ENSG00000167861	HID1	0.682799	1.60525	0.0632378	0.277664	73.5084	53.4393	117.999	65.0293
ENSG00000204396	VWA7	0.681417	1.60371	0.0888946	0.328904	7.19489	5.67442	11.5385	6.755
ENSG00000183943	PRKX	0.681049	1.60331	0.0224201	0.172587	17.1764	9.19193	27.539	13.5965
ENSG00000165389	SPTSSA	0.680283	1.60245	0.194325	0.467414	165.006	116.445	264.414	357.318
ENSG00000229152	ANKRD10-IT1	0.679553	1.60164	0.102097	0.350206	6.35702	5.44468	10.1817	5.90095
ENSG00000054277	OPN3	0.679185	1.60124	0.190772	0.463492	15.9192	10.8377	25.4904	32.8897
ENSG00000125434	SLC25A35	0.679124	1.60117	0.0991331	0.345671	10.1163	7.29024	16.1979	19.3189
ENSG00000222037	IGLC6	0.678993	1.60102	0.38254	0.648301	0.877084	1.33252	1.40423	1.83697
ENSG00000130513	GDF15	0.678778	1.60078	0.171623	0.441309	65.5833	79.2094	104.985	96.9395
ENSG00000140859	KIFC3	0.678655	1.60065	0.0532782	0.257327	62.0807	48.9487	99.3693	64.4513
ENSG00000255320	AP000759.1	0.677246	1.59908	0.0610169	0.274223	1.37787	0.743318	2.20333	1.13492
ENSG00000185950	IRS2	0.676763	1.59855	0.291684	0.569154	56.4816	82.351	90.2886	97.8705
ENSG00000116809	ZBTB17	0.675646	1.59731	0.00334585	0.088904	25.0359	10.1196	39.9901	13.2036
ENSG00000051128	HOMER3	0.674603	1.59616	0.0849706	0.320807	20.4269	9.72641	32.6046	28.2578
ENSG00000072210	ALDH3A2	0.674177	1.59569	0.166142	0.435442	146.537	94.4358	233.826	295.057
ENSG00000182704	TSKU	0.673981	1.59547	0.116116	0.36875	48.6386	42.2193	77.6013	66.2229
ENSG00000092929	UNC13D	0.67384	1.59531	0.126585	0.38469	54.4794	58.239	86.9117	57.3474
ENSG00000136883	KIF12	0.673815	1.59529	0.331204	0.60474	9.54314	9.63936	15.224	19.8535
ENSG00000085552	IGSF9	0.673796	1.59526	0.11377	0.365983	26.5127	17.7167	42.2948	34.8998
ENSG00000169855	ROBO1	0.673752	1.59522	0.109877	0.359704	26.6516	21.412	42.515	29.9563
ENSG00000131876	SNRPA1	0.672914	1.59429	0.00279428	0.0844587	29.9229	8.88749	47.7058	19.87
ENSG00000125877	ITPA	0.672442	1.59377	0.0211146	0.168569	44.743	24.8284	71.31	30.8853
ENSG00000168993	CPLX1	0.672248	1.59355	0.265301	0.545848	5.64936	6.12306	9.00256	9.86537
ENSG00000150594	ADRA2A	0.671783	1.59304	0.367682	0.63603	12.0973	18.9468	19.2714	38.7526
ENSG00000124593	AL365205.1	0.671722	1.59297	0.157266	0.425127	11.3032	9.6312	18.0057	18.3696
ENSG00000109920	FNBP4	0.671473	1.5927	0.00768504	0.116023	58.2333	30.0961	92.7481	25.5114
ENSG00000118162	KPTN	0.671382	1.5926	0.0097396	0.125668	7.63653	3.76296	12.1619	3.50611
ENSG00000196405	EVL	0.671196	1.59239	0.00713871	0.113054	68.9409	34.6103	109.781	36.7525
ENSG00000110811	P3H3	0.670991	1.59217	0.192012	0.465629	25.864	29.3389	41.1797	37.205
ENSG00000272172	AC138696.2	0.670902	1.59207	0.177869	0.449693	0.47093	0.44971	0.749753	0.764928
ENSG00000111012	CYP27B1	0.670899	1.59206	0.0981804	0.345389	6.96551	5.02296	11.0895	7.10658
ENSG00000107796	ACTA2	0.670695	1.59184	0.0241267	0.178194	117.813	47.5018	187.54	87.2491
ENSG00000105321	CCDC9	0.670577	1.59171	0.00636397	0.108617	22.8664	10.7427	36.3966	11.7877
ENSG00000100836	PABPN1	0.670241	1.59134	0.0137228	0.142746	74.7092	36.6957	118.888	53.0377
ENSG00000143013	LMO4	0.670139	1.59123	0.0971361	0.343458	39.0178	26.7911	62.0862	55.0944
ENSG00000108106	UBE2S	0.668879	1.58984	0.0991815	0.345671	19.9889	13.9658	31.7791	18.645
ENSG00000168679	SLC16A4	0.667943	1.58881	0.236355	0.515683	19.7869	18.7208	31.4375	33.4356
ENSG00000197150	ABCB8	0.667053	1.58783	0.00881457	0.122525	38.6415	16.5272	61.356	27.1834
ENSG00000049540	ELN	0.667033	1.5878	0.177169	0.449158	67.027	48.8209	106.426	91.4257
ENSG00000100311	PDGFB	0.666894	1.58765	0.0195745	0.163683	15.3886	8.02214	24.4317	9.46868
ENSG00000214026	MRPL23	0.666623	1.58735	0.0411463	0.228287	23.3812	11.2995	37.1143	27.0402
ENSG00000112787	FBRSL1	0.666166	1.58685	0.0143302	0.145437	53.585	26.3602	85.0313	34.4864
ENSG00000167685	ZNF444	0.665524	1.58614	0.0312776	0.200811	41.1749	26.689	65.3094	29.8199
ENSG00000144591	GMPPA	0.66552	1.58614	0.00371758	0.0922657	50.2673	15.1068	79.7311	31.542
ENSG00000137965	IFI44	0.665317	1.58592	0.172092	0.441904	28.2605	19.2752	44.8188	42.9756
ENSG00000165802	NSMF	0.665117	1.5857	0.0637025	0.278849	58.1008	30.8941	92.1303	78.3134
ENSG00000237649	KIFC1	0.664796	1.58534	0.118042	0.371957	21.7564	17.3643	34.4914	19.3046
ENSG00000172366	MCRIP2	0.66454	1.58506	0.0702911	0.293461	32.7879	20.0568	51.9709	39.1956
ENSG00000211899	IGHM	0.664311	1.58481	0.378451	0.645123	1334.48	1469.96	2114.9	2563.05
ENSG00000144589	STK11IP	0.662635	1.58297	0.0037705	0.0928661	21.5549	8.68785	34.1208	9.46395
ENSG00000158792	SPATA2L	0.662273	1.58257	0.0179186	0.159175	11.0822	5.10422	17.5384	6.93946
ENSG00000175203	DCTN2	0.662242	1.58254	0.0548025	0.260392	114.256	48.0325	180.815	214.604
ENSG00000126353	CCR7	0.661292	1.5815	0.15008	0.414652	8.10368	6.98638	12.816	8.67563
ENSG00000117616	RSRP1	0.660397	1.58052	0.0555071	0.261898	44.6909	33.9207	70.6347	26.7425
ENSG00000224373	IGHV4-59	0.660178	1.58028	0.406957	0.66985	107.216	130.106	169.43	194.98
ENSG00000060491	OGFR	0.659604	1.57965	0.0101718	0.128265	46.5171	19.5637	73.4806	31.2887
ENSG00000100151	PICK1	0.659318	1.57934	0.00536342	0.10226	27.8296	12.8672	43.9522	13.0449
ENSG00000235823	OLMALINC	0.658905	1.57888	0.0581384	0.26664	9.60984	5.30476	15.1728	9.22323
ENSG00000242193	CRYZL2P	0.658113	1.57802	0.0101788	0.128265	13.6728	4.48855	21.576	11.0481
ENSG00000006747	SCIN	0.657784	1.57766	0.3706	0.638135	48.8023	46.459	76.9933	110.82
ENSG00000130176	CNN1	0.657758	1.57763	0.0670782	0.287055	8.49247	5.07089	13.398	7.43757
ENSG00000087842	PIR	0.657621	1.57748	0.135278	0.39485	17.9735	19.1027	28.3528	22.4071
ENSG00000166165	CKB	0.657042	1.57685	0.318307	0.594052	77.4501	81.3791	122.127	144.937
ENSG00000197785	ATAD3A	0.657042	1.57685	0.0457237	0.238345	26.6712	11.9706	42.0563	31.0546
ENSG00000064547	LPAR2	0.656357	1.5761	0.0236129	0.17683	15.9005	6.00114	25.0607	14.1334
ENSG00000100376	FAM118A	0.656033	1.57574	0.0575291	0.265355	18.3952	10.8237	28.9861	21.9799
ENSG00000099860	GADD45B	0.655991	1.5757	0.063012	0.277405	48.0211	30.5548	75.6667	49.1124
ENSG00000180900	SCRIB	0.655925	1.57563	0.0460079	0.23929	104.315	63.3807	164.361	76.0761
ENSG00000184207	PGP	0.65575	1.57544	0.020631	0.167232	18.4007	9.44559	28.9891	12.6384
ENSG00000131389	SLC6A6	0.655717	1.5754	0.0121365	0.136313	88.9053	34.5802	140.061	68.7302
ENSG00000169718	DUS1L	0.655144	1.57477	0.0179944	0.159445	96.9745	42.5203	152.713	84.2687
ENSG00000242802	AP5Z1	0.654817	1.57442	0.0117062	0.134205	47.2027	18.4842	74.3167	34.8496
ENSG00000120896	SORBS3	0.6548	1.5744	0.0295792	0.195921	69.5339	23.1259	109.474	76.9031
ENSG00000133250	ZNF414	0.65459	1.57417	0.0168254	0.155065	8.97351	4.84457	14.1258	6.06016
ENSG00000185361	TNFAIP8L1	0.654374	1.57393	0.0204574	0.166922	16.9113	6.76339	26.6173	13.9132
ENSG00000136720	HS6ST1	0.653973	1.5735	0.0218248	0.171124	32.374	18.8422	50.9404	21.1347
ENSG00000090006	LTBP4	0.653842	1.57335	0.0822443	0.315704	80.7459	44.4306	127.042	85.8976
ENSG00000166794	PPIB	0.653378	1.57285	0.0443437	0.234725	247.218	95.8261	388.836	296.797
ENSG00000176444	CLK2	0.652936	1.57236	0.00119364	0.0631256	43.7559	15.165	68.8003	17.3766
ENSG00000111490	TBC1D30	0.652776	1.57219	0.0959451	0.341738	20.0292	13.105	31.4898	17.7714
ENSG00000168061	SAC3D1	0.65198	1.57132	0.0197984	0.164258	9.50703	4.12893	14.9386	7.05114
ENSG00000171316	CHD7	0.651866	1.5712	0.154577	0.420784	37.5618	50.6964	59.017	46.1617
ENSG00000166562	SEC11C	0.651816	1.57114	0.226774	0.504714	112.571	109.412	176.866	218.4
ENSG00000104973	MED25	0.651333	1.57062	0.00628945	0.108162	46.3548	20.6389	72.8058	25.8673
ENSG00000068971	PPP2R5B	0.65123	1.57051	0.00688765	0.111972	17.0755	6.74052	26.8172	10.2607
ENSG00000149476	TKFC	0.650632	1.56986	0.0128377	0.139802	39.7204	17.3463	62.3553	29.0703
ENSG00000127191	TRAF2	0.649997	1.56917	0.0256867	0.184759	31.6188	17.16	49.6152	27.5694
ENSG00000132688	NES	0.649813	1.56896	0.204987	0.479415	49.2739	46.9643	77.3091	73.8513
ENSG00000187017	ESPN	0.649394	1.56851	0.291459	0.569154	16.3857	22.8896	25.7011	29.7625
ENSG00000204859	ZBTB48	0.649371	1.56848	0.00905586	0.122656	21.1143	6.98501	33.1174	17.2344
ENSG00000073050	XRCC1	0.64923	1.56833	0.00477226	0.099018	32.4177	7.96813	50.8417	26.2349
ENSG00000267080	ASB16-AS1	0.649206	1.5683	0.0282439	0.191755	9.32648	5.71513	14.6268	5.06178
ENSG00000125898	FAM110A	0.648976	1.56805	0.0757368	0.303573	19.1837	14.6883	30.081	18.1196
ENSG00000112984	KIF20A	0.647716	1.56669	0.112223	0.362896	15.8019	10.5634	24.7566	14.4613
ENSG00000087074	PPP1R15A	0.647604	1.56656	0.0211837	0.168713	71.4804	31.193	111.979	65.1093
ENSG00000184056	VPS33B	0.647218	1.56615	0.000432833	0.0576882	14.6366	3.10689	22.923	6.30178
ENSG00000039650	PNKP	0.6467	1.56558	0.00426369	0.0957035	32.5031	12.3116	50.8864	16.782
ENSG00000157404	KIT	0.646401	1.56526	0.36147	0.630345	48.6356	77.2603	76.1273	100.456
ENSG00000129355	CDKN2D	0.646304	1.56515	0.0624635	0.277137	8.07253	4.67853	12.6347	8.43314
ENSG00000108773	KAT2A	0.646256	1.5651	0.0232627	0.17552	64.7763	37.3736	101.381	40.9056
ENSG00000258534	AL132712.1	0.646246	1.56509	0.216102	0.492602	1.2963	1.05803	2.02883	2.51874
ENSG00000133275	CSNK1G2	0.646218	1.56506	0.00127999	0.0647785	51.223	14.5054	80.1671	23.1964
ENSG00000174276	ZNHIT2	0.646091	1.56492	0.0341377	0.209574	12.9309	4.78863	20.2359	13.1562
ENSG00000204351	SKIV2L	0.645182	1.56394	0.00178555	0.0719162	57.2205	21.3573	89.4892	21.5105
ENSG00000260257	AL035071.1	0.645096	1.56384	0.0626965	0.277149	6.08536	4.13923	9.51655	3.39969
ENSG00000254986	DPP3	0.645044	1.56379	0.00985748	0.126355	57.699	26.8321	90.2289	28.8488
ENSG00000025708	TYMP	0.644292	1.56297	0.0354088	0.213664	131.288	63.2991	205.2	100.501
ENSG00000104886	PLEKHJ1	0.644072	1.56273	0.00998254	0.126714	34.5221	11.938	53.9489	25.115
ENSG00000001084	GCLC	0.643689	1.56232	0.274127	0.552717	85.3372	74.425	133.324	176.347
ENSG00000114854	TNNC1	0.643514	1.56213	0.338117	0.610951	4.78707	4.63789	7.47803	7.45321
ENSG00000183048	SLC25A10	0.64326	1.56185	0.0900452	0.331136	17.5237	11.7609	27.3695	17.4216
ENSG00000136717	BIN1	0.643094	1.56167	0.035236	0.213198	41.9126	21.3041	65.4538	38.2493
ENSG00000196465	MYL6B	0.642982	1.56155	0.0250173	0.181887	34.4632	14.6971	53.8161	34.313
ENSG00000131746	TNS4	0.642824	1.56138	0.392416	0.657604	15.2261	20.0827	23.7737	31.9085
ENSG00000264538	SUZ12P1	0.642776	1.56133	0.0120538	0.136106	7.35679	3.88311	11.4864	3.27718
ENSG00000123485	HJURP	0.642766	1.56132	0.161124	0.428878	15.7434	11.6725	24.5805	13.9609
ENSG00000179943	FIZ1	0.642243	1.56075	0.00963988	0.125023	14.9963	5.91404	23.4056	8.90294
ENSG00000256940	PPP1R14B-AS1	0.641615	1.56007	0.136504	0.396137	1.25343	1.07101	1.95544	1.42695
ENSG00000184205	TSPYL2	0.641392	1.55983	0.0360231	0.215488	27.2402	16.5813	42.4902	21.0732
ENSG00000211637	IGLV4-69	0.641129	1.55955	0.39038	0.655419	37.3279	45.7784	58.2147	56.0035
ENSG00000105325	FZR1	0.640077	1.55841	0.00177257	0.0717425	39.1153	10.1246	60.9577	20.361
ENSG00000123427	EEF1AKMT3	0.639561	1.55785	0.0645135	0.280096	15.9569	8.69809	24.8585	25.802
ENSG00000211666	IGLV2-14	0.639305	1.55758	0.412692	0.674675	204.386	353.484	318.347	446.122
ENSG00000117020	AKT3	0.638833	1.55707	0.193423	0.466235	22.0892	19.809	34.3944	37.3331
ENSG00000094631	HDAC6	0.638471	1.55668	0.00168614	0.0697951	44.4018	17.7823	69.1194	14.3447
ENSG00000180953	ST20	0.638149	1.55633	0.0625427	0.277137	3.29591	1.90629	5.12953	3.25119
ENSG00000222345	SNORD19C	0.637935	1.5561	0.197108	0.47	0.262827	0.280876	0.408986	0.218232
ENSG00000111206	FOXM1	0.637142	1.55525	0.183285	0.456148	36.6687	26.3956	57.0289	60.0785
ENSG00000214021	TTLL3	0.637087	1.55519	0.142052	0.40374	19.8906	20.842	30.9336	17.8731
ENSG00000158717	RNF166	0.637005	1.5551	0.0026183	0.0826043	20.6853	7.64337	32.1676	9.09748
ENSG00000126822	PLEKHG3	0.636624	1.55469	0.113341	0.365149	23.7783	18.0337	36.9678	20.7429
ENSG00000169062	UPF3A	0.636363	1.55441	0.00460437	0.097626	23.9594	9.56155	37.2427	9.94444
ENSG00000179335	CLK3	0.635969	1.55398	0.00175699	0.0715081	45.4527	14.4909	70.6327	21.7633
ENSG00000136490	LIMD2	0.635277	1.55324	0.0774008	0.306492	32.8146	19.6913	50.9688	29.841
ENSG00000171552	BCL2L1	0.634855	1.55278	0.0370224	0.217478	113.669	32.8953	176.503	151.527
ENSG00000177156	TALDO1	0.6346	1.55251	0.0917142	0.334745	214.406	150.92	332.867	271.93
ENSG00000105486	LIG1	0.634265	1.55215	0.00221084	0.0759119	32.7951	10.0012	50.9028	15.6066
ENSG00000101940	WDR13	0.633763	1.55161	0.00893387	0.122525	67.7181	21.0155	105.072	46.2852
ENSG00000139343	SNRPF	0.633644	1.55148	0.0186772	0.16145	37.9734	12.3875	58.9149	30.2177
ENSG00000007080	CCDC124	0.633275	1.55108	0.0176421	0.157844	39.1267	13.8887	60.6887	28.8016
ENSG00000122390	NAA60	0.632826	1.5506	0.0221188	0.171413	25.099	12.3425	38.9184	23.5778
ENSG00000165434	PGM2L1	0.632602	1.55036	0.141847	0.40374	42.2358	25.4429	65.4807	78.0993
ENSG00000162949	CAPN13	0.631875	1.54958	0.375342	0.642645	45.4769	74.9273	70.47	112.977
ENSG00000211753	TRBV28	0.63181	1.54951	0.159453	0.427603	7.18526	5.83711	11.1336	7.29411
ENSG00000279382	AC018665.1	0.63167	1.54936	0.126449	0.384665	2.99977	1.95541	4.64772	2.0127
ENSG00000137496	IL18BP	0.631268	1.54893	0.0528835	0.256107	21.9121	18.4468	33.9402	15.6348
ENSG00000013810	TACC3	0.630978	1.54861	0.0683525	0.289655	54.0581	35.1009	83.7152	48.9287
ENSG00000168014	C2CD3	0.630273	1.54786	0.0556112	0.261946	34.1893	16.6479	52.9202	39.7475
ENSG00000141499	WRAP53	0.630133	1.54771	0.0110865	0.130746	11.0859	3.09122	17.1577	7.90115
ENSG00000143248	RGS5	0.629551	1.54708	0.137269	0.397223	64.6512	46.0702	100.021	127.351
ENSG00000275183	LENG9	0.629529	1.54706	0.0662277	0.284777	5.13389	2.33312	7.94244	5.07793
ENSG00000124839	RAB17	0.629401	1.54692	0.0921706	0.335166	33.4153	25.8842	51.6908	32.255
ENSG00000134780	DAGLA	0.629376	1.5469	0.053239	0.257244	10.1338	6.26616	15.6759	7.61831
ENSG00000141480	ARRB2	0.62906	1.54656	0.0183239	0.160435	44.9025	15.292	69.4442	47.0596
ENSG00000123395	ATG101	0.628828	1.54631	0.0106482	0.129514	24.1441	9.27158	37.3342	16.474
ENSG00000073169	SELENOO	0.628417	1.54587	0.0316176	0.201473	19.5999	12.1741	30.2989	13.4767
ENSG00000116691	MIIP	0.628163	1.5456	0.0289747	0.193804	26.1184	11.5631	40.3685	23.7618
ENSG00000278196	IGLV2-8	0.627693	1.54509	0.392139	0.657519	35.8008	67.4399	55.3155	52.5622
ENSG00000148362	PAXX	0.627336	1.54471	0.0578903	0.266131	27.6868	11.7721	42.7681	34.7628
ENSG00000079313	REXO1	0.627301	1.54467	0.00453397	0.0971923	28.2829	9.80788	43.6878	12.2721
ENSG00000078269	SYNJ2	0.627072	1.54443	0.0246328	0.18033	27.6695	14.0154	42.7335	21.8438
ENSG00000204305	AGER	0.626489	1.5438	0.435669	0.691358	41.6019	99.2464	64.2252	111.238
ENSG00000076944	STXBP2	0.62632	1.54362	0.0119526	0.13547	57.3671	20.0654	88.5532	39.8597
ENSG00000187609	EXD3	0.626258	1.54356	0.0629262	0.277351	13.2586	8.79691	20.4654	10.5969
ENSG00000181192	DHTKD1	0.625969	1.54325	0.05343	0.257526	45.2323	14.8026	69.8046	72.4571
ENSG00000103326	CAPN15	0.625648	1.5429	0.0171617	0.156799	43.7257	23.7082	67.4646	23.4652
ENSG00000198976	MIR429	0.625592	1.54284	0.362115	0.630801	0.216668	0.301517	0.334285	0.326774
ENSG00000100359	SGSM3	0.625083	1.5423	0.0200057	0.165388	67.9542	33.9179	104.806	45.9994
ENSG00000176920	FUT2	0.625066	1.54228	0.321756	0.595997	23.3593	18.5624	36.0266	72.5768
ENSG00000049768	FOXP3	0.624834	1.54203	0.0838737	0.318529	5.58301	2.72079	8.60919	5.59382
ENSG00000184831	APOO	0.62443	1.5416	0.038577	0.220657	11.626	5.17363	17.9227	10.8745
ENSG00000142765	SYTL1	0.624422	1.54159	0.135724	0.395209	49.1517	24.2806	75.7719	75.7388
ENSG00000101213	PTK6	0.624218	1.54137	0.2221	0.499565	20.5745	17.4188	31.713	22.9996
ENSG00000261474	AC026471.4	0.622637	1.53969	0.103161	0.351417	1.70613	1.54481	2.62691	1.23535
ENSG00000101057	MYBL2	0.622089	1.5391	0.258078	0.538642	58.7467	47.8987	90.4172	55.7664
ENSG00000176715	ACSF3	0.621457	1.53843	0.0047052	0.0986821	23.595	7.33029	36.2992	12.5269
ENSG00000120675	DNAJC15	0.621232	1.53819	0.0447679	0.235578	35.8979	14.3181	55.2177	33.589
ENSG00000124641	MED20	0.621171	1.53812	0.140531	0.40221	22.6989	7.11203	34.9137	60.1749
ENSG00000279117	AP001972.5	0.620076	1.53696	0.134128	0.393459	19.2791	12.1205	29.6311	18.7543
ENSG00000213983	AP1G2	0.619758	1.53662	0.046433	0.240534	48.7776	25.4173	74.9525	38.8343
ENSG00000163017	ACTG2	0.619558	1.5364	0.119724	0.374564	11.2612	6.9591	17.3018	9.79143
ENSG00000110697	PITPNM1	0.61882	1.53562	0.0582502	0.267047	55.9631	24.2247	85.9379	74.5123
ENSG00000141012	GALNS	0.618189	1.53495	0.0315648	0.201434	27.2249	20.0598	41.7888	14.4408
ENSG00000131149	GSE1	0.617939	1.53468	0.0682392	0.289655	128.671	86.0136	197.468	99.8691
ENSG00000182866	LCK	0.617934	1.53468	0.151244	0.415795	13.8143	11.875	21.2004	14.2034
ENSG00000185187	SIGIRR	0.617626	1.53435	0.0666111	0.285792	41.2557	31.9105	63.3006	46.101
ENSG00000243302	AC018638.4	0.617203	1.5339	0.0804075	0.311669	7.47699	5.61079	11.4689	3.17668
ENSG00000179912	R3HDM2	0.617157	1.53385	0.00392211	0.0930459	37.2914	12.0099	57.1994	16.6814
ENSG00000148426	PROSER2	0.616752	1.53342	0.123991	0.380705	13.8942	9.98067	21.3056	11.831
ENSG00000181617	FDCSP	0.61646	1.53311	0.437381	0.69276	2.57234	3.49319	3.94367	3.59536
ENSG00000133027	PEMT	0.615842	1.53245	0.02206	0.171271	13.8386	5.50918	21.207	11.4844
ENSG00000178921	PFAS	0.61506	1.53162	0.010896	0.130555	23.1559	8.67247	35.466	14.5603
ENSG00000261221	ZNF865	0.615009	1.53157	0.0248957	0.181457	17.8472	9.39305	27.3342	11.7177
ENSG00000064607	SUGP2	0.614758	1.5313	0.00329835	0.088904	36.565	13.9331	55.992	10.8864
ENSG00000188997	KCTD21	0.614383	1.5309	0.0323163	0.204218	13.0986	4.09165	20.0528	14.7649
ENSG00000211592	IGKC	0.61416	1.53067	0.426726	0.685305	4679.72	7175.96	7163.1	6419.09
ENSG00000122386	ZNF205	0.614058	1.53056	0.0501678	0.249873	13.5596	7.14344	20.7538	14.5397
ENSG00000152082	MZT2B	0.613357	1.52982	0.102421	0.350836	47.0077	21.6165	71.9132	63.3083
ENSG00000143878	RHOB	0.613225	1.52967	0.0902908	0.331646	234.896	165.815	359.315	236.455
ENSG00000006534	ALDH3B1	0.612819	1.52924	0.129995	0.388845	84.8553	57.0782	129.764	92.187
ENSG00000160447	PKN3	0.612741	1.52916	0.0400718	0.225549	10.8977	5.29052	16.6643	11.1414
ENSG00000161091	MFSD12	0.612464	1.52887	0.00966417	0.125129	40.8585	13.0461	62.4672	27.6961
ENSG00000172432	GTPBP2	0.611938	1.52831	0.00153357	0.0691891	63.43	21.424	96.9408	22.6408
ENSG00000113108	APBB3	0.611534	1.52788	0.0470143	0.241456	11.233	7.80521	17.1628	6.09449
ENSG00000170955	CAVIN3	0.611292	1.52763	0.163503	0.431511	13.4896	11.9556	20.6071	16.9919
ENSG00000135587	SMPD2	0.610916	1.52723	0.00933894	0.124012	11.2524	4.25698	17.185	6.18205
ENSG00000111077	TNS2	0.610846	1.52715	0.0770543	0.306009	60.665	32.3162	92.6448	74.7506
ENSG00000275301		0.61052	1.52681	0.459174	0.708987	0.208649	0.418282	0.318567	0.45868
ENSG00000169248	CXCL11	0.610219	1.52649	0.376708	0.643725	6.41556	7.38436	9.79329	17.4654
ENSG00000133874	RNF122	0.609995	1.52625	0.0228181	0.173516	8.08385	3.95329	12.338	4.58823
ENSG00000105298	CACTIN	0.609918	1.52617	0.00392133	0.0930459	16.931	4.72681	25.8396	7.19944
ENSG00000132424	PNISR	0.609844	1.52609	0.0691606	0.290945	72.2649	57.6042	110.283	46.6221
ENSG00000095066	HOOK2	0.609441	1.52567	0.0642052	0.28005	37.5492	27.8275	57.2876	24.7427
ENSG00000099953	MMP11	0.609274	1.52549	0.351975	0.62198	69.7194	78.3171	106.356	128.112
ENSG00000124574	ABCC10	0.609208	1.52542	0.0105164	0.129262	28.8136	14.5087	43.9529	10.3249
ENSG00000123989	CHPF	0.609082	1.52529	0.0313943	0.201042	125.08	57.9859	190.783	89.9311
ENSG00000184470	TXNRD2	0.608997	1.5252	0.0449728	0.236016	30.3882	16.0207	46.3481	26.6786
ENSG00000121680	PEX16	0.608835	1.52503	0.0128137	0.139786	21.8838	6.40105	33.3734	17.1425
ENSG00000073849	ST6GAL1	0.608761	1.52495	0.186321	0.457838	118.508	55.7151	180.719	275.175
ENSG00000125637	PSD4	0.608532	1.52471	0.00900785	0.122582	66.659	23.8783	101.635	30.3379
ENSG00000114115	RBP1	0.608429	1.5246	0.118747	0.373118	12.1403	7.61073	18.509	14.4071
ENSG00000116754	SRSF11	0.608318	1.52448	0.00299084	0.0861716	143.394	37.027	218.601	76.1596
ENSG00000170638	TRABD	0.607386	1.5235	0.0136317	0.142538	47.2398	25.322	71.9696	16.3053
ENSG00000130768	SMPDL3B	0.606574	1.52264	0.135637	0.395197	53.4414	28.6607	81.3719	87.9728
ENSG00000160883	HK3	0.60611	1.52215	0.168672	0.438541	11.1366	8.00743	16.9515	12.0152
ENSG00000130332	LSM7	0.606107	1.52215	0.0229311	0.174001	31.1999	17.7704	47.4909	18.5853
ENSG00000130254	SAFB2	0.605511	1.52152	0.0128827	0.13992	45.737	21.5342	69.5896	12.7821
ENSG00000105397	TYK2	0.604575	1.52053	0.00657229	0.109444	71.4238	30.2588	108.602	31.9117
ENSG00000168140	VASN	0.60438	1.52033	0.126611	0.38469	29.0531	24.1549	44.1702	30.6477
ENSG00000087116	ADAMTS2	0.604292	1.52023	0.134496	0.393772	24.077	16.9569	36.6026	30.3771
ENSG00000018280	SLC11A1	0.603617	1.51952	0.126269	0.384253	23.4819	14.0833	35.6813	21.98
ENSG00000166831	RBPMS2	0.602935	1.5188	0.334575	0.607653	5.08838	7.84577	7.72825	8.0291
ENSG00000185482	STAC3	0.602913	1.51878	0.0263453	0.186721	4.20768	2.10577	6.39054	2.24904
ENSG00000185504	FAAP100	0.60277	1.51863	0.0184325	0.160835	44.2357	17.0282	67.1777	28.6168
ENSG00000121898	CPXM2	0.602295	1.51813	0.219538	0.497164	14.986	16.0791	22.7507	18.5582
ENSG00000196139	AKR1C3	0.602201	1.51803	0.548174	0.769462	143.652	343.314	218.069	393.373
ENSG00000141456	PELP1	0.602164	1.51799	0.0276177	0.190223	62.001	22.433	94.1169	60.9547
ENSG00000177106	EPS8L2	0.601986	1.5178	0.0561117	0.262727	108.81	69.8597	165.153	94.4397
ENSG00000157873	TNFRSF14	0.601488	1.51728	0.0380909	0.219735	63.0701	23.7011	95.695	52.8021
ENSG00000168958	MFF	0.601403	1.51719	0.0176413	0.157844	55.7655	14.0667	84.607	56.5377
ENSG00000259803	SLC22A31	0.601099	1.51687	0.363973	0.632618	78.5197	96.4029	119.104	148.829
ENSG00000171067	C11orf24	0.600973	1.51674	0.0545827	0.260173	53.1811	30.7488	80.6619	47.9179
ENSG00000015285	WAS	0.600438	1.51618	0.0616033	0.275324	14.3644	8.44644	21.779	9.70984
ENSG00000198840	MT-ND3	0.599895	1.51561	0.160464	0.428208	904.829	866.541	1371.36	959.313
ENSG00000148399	DPH7	0.599289	1.51497	0.00767963	0.116023	20.4352	8.29105	30.9588	10.5308
ENSG00000162929	KIAA1841	0.599254	1.51493	0.0835422	0.3181	16.82	6.97682	25.4812	21.7612
ENSG00000103222	ABCC1	0.599071	1.51474	0.0151504	0.149505	69.1514	33.5789	104.746	35.1095
ENSG00000131143	COX4I1	0.598962	1.51463	0.049947	0.249307	221.974	122.618	336.207	202.429
ENSG00000071282	LMCD1	0.598334	1.51397	0.0276761	0.190223	31.6274	14.9964	47.8829	21.7522
ENSG00000131055	COX4I2	0.597467	1.51306	0.189823	0.462479	3.00377	2.08996	4.54487	4.76393
ENSG00000177042	TMEM80	0.597241	1.51282	0.0415702	0.229331	17.455	10.3274	26.4063	10.7701
ENSG00000130592	LSP1	0.596977	1.51254	0.0565761	0.263072	57.1388	24.6148	86.425	45.7221
ENSG00000241370	RPP21	0.596655	1.51221	0.0458914	0.238898	6.66154	3.141	10.0736	5.86869
ENSG00000137831	UACA	0.596418	1.51196	0.029083	0.194332	32.3511	16.7721	48.9135	18.0517
ENSG00000135709	KIAA0513	0.596314	1.51185	0.0539966	0.259204	23.987	11.8818	36.2647	23.3371
ENSG00000155287	SLC25A28	0.596095	1.51162	0.00351665	0.0898681	22.8415	5.06964	34.5277	14.3172
ENSG00000254395	IGHV4-55	0.595964	1.51148	0.357747	0.627884	4.16619	5.12576	6.29712	6.32107
ENSG00000140365	COMMD4	0.595733	1.51124	0.0203824	0.166922	46.8368	17.8497	70.7817	37.7435
ENSG00000167522	ANKRD11	0.595338	1.51083	0.00742454	0.114466	81.4611	31.9914	123.074	23.4344
ENSG00000142675	CNKSR1	0.595248	1.51073	0.0527049	0.25592	34.2588	17.062	51.7559	30.1535
ENSG00000223313	RNU6-516P	0.594085	1.50952	0.0680386	0.289192	0.177245	0.0853053	0.267554	0.122776
ENSG00000162458	FBLIM1	0.593431	1.50883	0.0307634	0.199602	52.918	25.6008	79.8442	35.0002
ENSG00000166851	PLK1	0.593091	1.50848	0.109259	0.35938	25.6796	15.1408	38.7371	22.0732
ENSG00000170421	KRT8	0.592888	1.50826	0.0444323	0.234794	706.75	415.334	1065.96	432.449
ENSG00000177666	PNPLA2	0.592635	1.508	0.0228434	0.173562	62.771	28.7676	94.6585	42.9599
ENSG00000123352	SPATS2	0.592494	1.50785	0.0219786	0.171124	32.5425	13.5662	49.0693	22.0912
ENSG00000128973	CLN6	0.59246	1.50782	0.0160524	0.153407	38.2057	17.367	57.6071	24.1912
ENSG00000172732	MUS81	0.592186	1.50753	0.00465803	0.098402	32.3154	11.4815	48.7164	14.4667
ENSG00000272894	AC004982.2	0.592165	1.50751	0.186738	0.458476	5.02146	2.97829	7.56989	6.94754
ENSG00000184489	PTP4A3	0.591743	1.50707	0.0856423	0.322092	73.5309	45.6168	110.816	52.4492
ENSG00000138964	PARVG	0.591499	1.50681	0.107583	0.357382	21.3559	14.156	32.1794	20.1487
ENSG00000110237	ARHGEF17	0.591384	1.50669	0.0902592	0.331634	57.0414	26.1581	85.9438	68.3751
ENSG00000198331	HYLS1	0.591331	1.50664	0.0816747	0.314487	6.77447	2.75412	10.2067	7.71619
ENSG00000240849	TMEM189	0.591237	1.50654	0.00351192	0.0898681	38.2063	8.65737	57.5593	22.3739
ENSG00000137331	IER3	0.591179	1.50648	0.131252	0.389616	52.1695	27.6528	78.5922	84.3917
ENSG00000173715	C11orf80	0.590972	1.50626	0.0184753	0.160968	22.5764	7.84338	34.0059	15.4976
ENSG00000233184	AC093157.1	0.590861	1.50615	0.03704	0.217478	5.22158	2.76807	7.86445	3.22291
ENSG00000059378	PARP12	0.59086	1.50614	0.00337961	0.088904	48.1696	16.2852	72.5504	22.5725
ENSG00000100084	HIRA	0.590755	1.50603	0.0187161	0.161494	13.9773	5.14557	21.0503	9.70694
ENSG00000127528	KLF2	0.590676	1.50595	0.104241	0.352158	17.3589	9.9849	26.1417	17.2998
ENSG00000078699	CBFA2T2	0.590428	1.50569	0.0398148	0.224952	39.861	18.0899	60.0185	34.0669
ENSG00000197070	ARRDC1	0.590226	1.50548	0.0608565	0.273812	60.4762	33.5516	91.0458	54.942
ENSG00000161544	CYGB	0.589316	1.50453	0.0297003	0.196204	10.5546	3.51124	15.8797	7.65202
ENSG00000113070	HBEGF	0.589213	1.50443	0.239523	0.519208	19.0905	18.3261	28.7203	27.2238
ENSG00000182199	SHMT2	0.589082	1.50429	0.0292733	0.195352	92.7074	34.2961	139.459	73.755
ENSG00000154957	ZNF18	0.589069	1.50428	0.0124933	0.138102	7.71997	1.9468	11.613	4.44402
ENSG00000106012	IQCE	0.588875	1.50407	0.0550113	0.260734	42.2	15.4239	63.4719	48.6554
ENSG00000071626	DAZAP1	0.588823	1.50402	0.00134652	0.0662588	96.7973	26.5275	145.585	35.3696
ENSG00000115758	ODC1	0.58868	1.50387	0.284042	0.562805	185.554	220.518	279.049	404.806
ENSG00000184281	TSSC4	0.588505	1.50369	0.0117142	0.134205	27.1697	9.89089	40.8548	15.6807
ENSG00000227946	AC007383.1	0.587931	1.50309	0.0430269	0.232729	2.21084	0.966457	3.32309	1.8732
ENSG00000087087	SRRT	0.5877	1.50285	0.0204642	0.166922	101.512	51.7097	152.557	54.5994
ENSG00000073350	LLGL2	0.587694	1.50284	0.102954	0.351182	111.788	81.7518	168	98.8368
ENSG00000153487	ING1	0.587607	1.50275	0.0159564	0.153159	18.8083	6.15388	28.2641	13.712
ENSG00000221944	TIGD1	0.587428	1.50257	0.111	0.361308	5.65004	3.38174	8.48955	6.40609
ENSG00000182782	HCAR2	0.587392	1.50253	0.361267	0.630345	5.97271	6.30225	8.97416	13.3742
ENSG00000146670	CDCA5	0.586683	1.50179	0.172518	0.44251	22.4925	16.3425	33.7791	24.1398
ENSG00000142327	RNPEPL1	0.586541	1.50164	0.0269273	0.18806	108.698	45.7281	163.226	85.1439
ENSG00000203485	INF2	0.58653	1.50163	0.0556666	0.261946	96.8419	41.8147	145.421	88.2782
ENSG00000103264	FBXO31	0.586036	1.50112	0.00399063	0.0930459	23.4605	6.32277	35.2169	12.5404
ENSG00000068400	GRIPAP1	0.585607	1.50067	0.0235586	0.17683	58.142	36.5206	87.252	22.1692
ENSG00000011021	CLCN6	0.585369	1.50042	0.0135074	0.142158	18.7773	7.61002	28.174	8.50413
ENSG00000198901	PRC1	0.585248	1.5003	0.121628	0.377166	31.6556	19.7855	47.4928	30.1812
ENSG00000148824	MTG1	0.585071	1.50011	0.0344967	0.210651	7.41992	3.59459	11.1307	4.47764
ENSG00000159335	PTMS	0.584922	1.49996	0.036989	0.217478	135.392	66.283	203.082	79.3698
ENSG00000161642	ZNF385A	0.58448	1.4995	0.0170184	0.155979	37.0076	20.1806	55.4928	13.7323
ENSG00000130511	SSBP4	0.583556	1.49854	0.0505207	0.250426	34.3631	15.5402	51.4944	32.9314
ENSG00000100079	LGALS2	0.583347	1.49832	0.278102	0.557061	3.28634	3.72548	4.92399	3.93371
ENSG00000214078	CPNE1	0.58245	1.49739	0.00630014	0.108162	110.523	38.9763	165.496	46.4207
ENSG00000131368	MRPS25	0.582274	1.49721	0.0604371	0.272881	46.2946	24.7374	69.3126	55.5397
ENSG00000140526	ABHD2	0.581989	1.49691	0.183321	0.456148	192.622	134.301	288.338	363.345
ENSG00000099204	ABLIM1	0.581941	1.49686	0.121559	0.377166	95.0527	69.9548	142.281	67.5051
ENSG00000130706	ADRM1	0.581591	1.4965	0.0135567	0.142419	94.3866	36.2782	141.249	54.4378
ENSG00000186654	PRR5	0.581302	1.4962	0.0712208	0.295232	11.2896	7.30787	16.8914	9.70457
ENSG00000162298	SYVN1	0.581242	1.49614	0.0315539	0.201434	102.655	48.6967	153.586	68.9272
ENSG00000189129	PLAC9	0.580888	1.49577	0.115773	0.368261	2.56625	1.54972	3.83852	2.34828
ENSG00000142089	IFITM3	0.580816	1.49569	0.120545	0.375575	410.225	222.376	613.571	545.424
ENSG00000185022	MAFF	0.580569	1.49544	0.0367011	0.216882	24.3001	13.0973	36.3393	18.0729
ENSG00000245849	RAD51-AS1	0.580276	1.49514	0.120376	0.375276	4.33384	2.7263	6.47968	4.05314
ENSG00000149150	SLC43A1	0.580149	1.495	0.101299	0.348645	13.0222	7.4273	19.4682	12.8563
ENSG00000167280	ENGASE	0.579986	1.49483	0.113278	0.36505	26.6635	25.2754	39.8575	15.4335
ENSG00000204622	HLA-J	0.579879	1.49472	0.202415	0.47699	3.90564	2.95899	5.83785	5.07958
ENSG00000162739	SLAMF6	0.579565	1.4944	0.258179	0.538663	8.57972	7.73427	12.8215	11.048
ENSG00000128016	ZFP36	0.579522	1.49435	0.196897	0.46984	189.496	199.059	283.174	244.707
ENSG00000182326	C1S	0.579477	1.49431	0.143754	0.406437	282.004	166.551	421.4	324.751
ENSG00000177051	FBXO46	0.57945	1.49428	0.021917	0.171124	20.0242	7.70792	29.9217	15.5098
ENSG00000164898	FMC1	0.579404	1.49423	0.140947	0.402903	7.90737	6.72681	11.8154	8.73382
ENSG00000112414	ADGRG6	0.579275	1.4941	0.159441	0.427603	38.1123	19.5125	56.9435	42.2225
ENSG00000106462	EZH2	0.579219	1.49404	0.106006	0.355595	23.8328	17.4636	35.6072	19.645
ENSG00000104946	TBC1D17	0.579161	1.49398	0.00789033	0.117147	39.7217	16.4425	59.3434	18.0084
ENSG00000135074	ADAM19	0.579001	1.49381	0.109265	0.35938	25.4413	15.7516	38.0046	25.0051
ENSG00000225697	SLC26A6	0.578983	1.4938	0.0309957	0.200075	15.7337	9.03919	23.503	7.50437
ENSG00000130731	METTL26	0.578913	1.49372	0.0930592	0.336714	48.7882	27.298	72.8761	57.961
ENSG00000080573	COL5A3	0.578899	1.49371	0.146047	0.408944	13.1566	9.39061	19.6521	13.5632
ENSG00000104983	CCDC61	0.578714	1.49352	0.0304661	0.198892	7.1856	3.45814	10.7318	4.08019
ENSG00000270015		0.57812	1.4929	0.0978599	0.344612	4.25582	2.81995	6.35352	2.47494
ENSG00000164896	FASTK	0.577631	1.4924	0.0626476	0.277149	90.5787	58.5531	135.179	64.1005
ENSG00000136111	TBC1D4	0.577563	1.49233	0.0783513	0.308424	22.7417	14.9903	33.938	17.4185
ENSG00000147168	IL2RG	0.576928	1.49167	0.11211	0.362893	37.5853	19.924	56.0648	35.7141
ENSG00000197461	PDGFA	0.576867	1.49161	0.133081	0.391973	22.0082	15.183	32.8276	24.2622
ENSG00000111641	NOP2	0.576671	1.4914	0.028598	0.193086	42.4494	19.1759	63.3091	28.2886
ENSG00000197568	HHLA3	0.576506	1.49123	0.110717	0.360939	7.35375	4.42231	10.9662	6.01042
ENSG00000149260	CAPN5	0.576485	1.49121	0.188109	0.460287	34.3558	26.6958	51.2317	48.9204
ENSG00000134815	DHX34	0.57639	1.49111	0.0133321	0.141754	25.3039	10.9965	37.731	7.86267
ENSG00000215375	MYL5	0.575908	1.49061	0.159938	0.427954	10.2601	10.3747	15.2938	9.2037
ENSG00000140691	ARMC5	0.575774	1.49048	0.0355736	0.214214	13.8147	8.02939	20.5904	6.73122
ENSG00000174744	BRMS1	0.575372	1.49006	0.0072348	0.113477	45.5178	12.5192	67.8243	26.0515
ENSG00000107159	CA9	0.574762	1.48943	0.531077	0.758321	10.4064	12.8883	15.4997	32.7895
ENSG00000086015	MAST2	0.574484	1.48915	0.0259984	0.185657	53.1647	22.4033	79.1699	36.8162
ENSG00000168487	BMP1	0.574411	1.48907	0.073916	0.299816	38.4739	25.6189	57.2903	32.9431
ENSG00000130813	SHFL	0.574332	1.48899	0.0237916	0.177181	21.3891	6.80094	31.8481	18.5116
ENSG00000167604	NFKBID	0.573814	1.48845	0.0659973	0.283961	7.34057	5.15671	10.9261	4.22445
ENSG00000100083	GGA1	0.573503	1.48813	0.0102826	0.128525	60.7485	27.0196	90.4017	24.532
ENSG00000126603	GLIS2	0.573285	1.48791	0.0274816	0.190069	27.2859	14.5992	40.5989	11.6906
ENSG00000176619	LMNB2	0.573208	1.48783	0.0216894	0.170354	64.6902	28.2543	96.2478	34.7601
ENSG00000267795	SMIM22	0.572901	1.48751	0.224985	0.503136	42.0807	31.0254	62.5955	73.6925
ENSG00000069011	PITX1	0.572834	1.48744	0.426175	0.684609	10.6824	14.1154	15.8895	20.7144
ENSG00000227039	ITGB2-AS1	0.572615	1.48722	0.256323	0.53649	5.73916	5.23946	8.53538	6.39217
ENSG00000131165	CHMP1A	0.572496	1.48709	0.0105572	0.129354	97.5654	32.6077	145.089	52.1847
ENSG00000129173	E2F8	0.572266	1.48686	0.123732	0.380211	8.49117	5.12926	12.6252	8.33929
ENSG00000185019	UBOX5	0.572003	1.48659	0.00616522	0.10743	11.1928	3.53347	16.6391	4.74495
ENSG00000167543	TP53I13	0.571632	1.4862	0.0513367	0.252469	32.1685	16.8422	47.809	27.2665
ENSG00000210196	MT-TP	0.570935	1.48549	0.0480518	0.243807	41.658	21.0061	61.8824	30.7316
ENSG00000122778	KIAA1549	0.570401	1.48494	0.177229	0.449158	23.3272	18.7429	34.6393	18.8667
ENSG00000198270	TMEM116	0.570304	1.48484	0.0841637	0.319152	15.0514	7.55253	22.3488	16.9535
ENSG00000130299	GTPBP3	0.570166	1.48469	0.0269057	0.18806	16.1936	8.07145	24.0425	8.6377
ENSG00000077312	SNRPA	0.57	1.48452	0.00993601	0.126619	52.0697	14.9481	77.2987	30.1478
ENSG00000100056	ESS2	0.569997	1.48452	0.0257213	0.184759	17.279	4.95246	25.651	14.3686
ENSG00000101246	ARFRP1	0.569504	1.48401	0.0134883	0.142158	36.292	12.438	53.8579	20.2902
ENSG00000203761	MSTO2P	0.569208	1.48371	0.0592128	0.269534	3.25805	1.89681	4.834	1.96653
ENSG00000147535	PLPP5	0.568781	1.48327	0.0105468	0.129354	46.2525	13.277	68.6049	29.1569
ENSG00000125826	RBCK1	0.568736	1.48322	0.026076	0.185756	87.2181	48.3936	129.364	43.3843
ENSG00000088038	CNOT3	0.568711	1.4832	0.0167419	0.154985	50.2342	19.9477	74.5073	27.4558
ENSG00000198467	TPM2	0.568676	1.48316	0.253165	0.533196	108.181	186.857	160.449	105.927
ENSG00000065665	SEC61A2	0.568607	1.48309	0.0415711	0.229331	8.19721	5.0421	12.1572	4.27257
ENSG00000001036	FUCA2	0.568339	1.48282	0.0378143	0.218984	64.7263	31.3326	95.9772	55.6124
ENSG00000011132	APBA3	0.568269	1.48274	0.00748954	0.115011	12.8426	3.74588	19.0423	6.59578
ENSG00000132781	MUTYH	0.568251	1.48272	0.040181	0.225946	12.1757	4.27908	18.0533	10.6614
ENSG00000277203	F8A1	0.568123	1.48259	0.2364	0.515685	6.90707	5.67782	10.2404	8.9308
ENSG00000131652	THOC6	0.568025	1.48249	0.0324296	0.204707	27.6013	10.6222	40.9188	23.5341
ENSG00000127054	INTS11	0.567912	1.48238	0.00900096	0.122582	82.4803	20.648	122.267	54.0491
ENSG00000130158	DOCK6	0.567703	1.48216	0.035295	0.21331	48.7022	28.5486	72.1846	18.4092
ENSG00000177606	JUN	0.567679	1.48214	0.111056	0.361389	213.11	126.489	315.858	199.448
ENSG00000203950	RTL8A	0.567674	1.48213	0.0625259	0.277137	41.1856	20.8588	61.0425	33.3782
ENSG00000139194	RBP5	0.567307	1.48175	0.0993939	0.345671	4.36347	2.85932	6.4656	2.78639
ENSG00000178685	PARP10	0.566622	1.48105	0.0515876	0.253367	72.1389	37.1718	106.842	52.5568
ENSG00000236609	ZNF853	0.565613	1.48002	0.280871	0.560009	10.1049	8.69762	14.9555	23.7689
ENSG00000275180	AC048341.2	0.564977	1.47936	0.237493	0.516907	1.25214	1.32305	1.85238	0.920581
ENSG00000198542	ITGBL1	0.564896	1.47928	0.221941	0.499457	17.0316	11.4859	25.1945	29.4028
ENSG00000129351	ILF3	0.564891	1.47928	0.0051302	0.101301	235.2	72.8473	347.926	81.3847
ENSG00000224660	SH3BP5-AS1	0.564757	1.47914	0.205411	0.479829	11.3302	10.7898	16.7589	8.70627
ENSG00000278259	MYO19	0.564356	1.47873	0.00628382	0.108162	44.4504	14.8724	65.73	19.8169
ENSG00000280206	AC026401.3	0.564096	1.47846	0.0771612	0.306224	5.85835	1.93625	8.66134	6.98652
ENSG00000125089	SH3TC1	0.563863	1.47822	0.0465874	0.240624	23.5338	10.266	34.7882	19.0796
ENSG00000132182	NUP210	0.563785	1.47814	0.155405	0.421756	98.5263	69.8001	145.636	136.005
ENSG00000278600	AC015871.3	0.563417	1.47776	0.120583	0.375593	4.30004	2.73728	6.35444	2.84474
ENSG00000260027	HOXB7	0.563286	1.47763	0.406716	0.669709	9.62432	10.9985	14.2212	23.1434
ENSG00000132510	KDM6B	0.562892	1.47723	0.0305803	0.199414	53.632	27.6172	79.2267	23.503
ENSG00000122678	POLM	0.562683	1.47701	0.0210043	0.168435	21.622	8.85859	31.9359	12.4554
ENSG00000185252	ZNF74	0.562419	1.47674	0.0779628	0.307525	15.0257	6.70865	22.1891	18.0408
ENSG00000189046	ALKBH2	0.562406	1.47673	0.0300215	0.197429	11.473	4.53015	16.9425	8.3669
ENSG00000181045	SLC26A11	0.561187	1.47548	0.00629026	0.108162	21.1701	7.42675	31.2362	8.35475
ENSG00000137504	CREBZF	0.560766	1.47505	0.0175886	0.157844	64.6172	27.2618	95.3138	31.5183
ENSG00000184232	OAF	0.560041	1.47431	0.0832282	0.317366	11.4977	5.15611	16.9512	11.826
ENSG00000132361	CLUH	0.559815	1.47408	0.0491283	0.246914	73.5837	38.053	108.468	52.5315
ENSG00000132793	LPIN3	0.559709	1.47397	0.0855701	0.321925	25.1195	18.3119	37.0254	12.8035
ENSG00000239855	IGKV1-6	0.559343	1.4736	0.438249	0.693478	20.6392	27.0262	30.4139	30.2106
ENSG00000143554	SLC27A3	0.559274	1.47353	0.0435596	0.23398	21.5759	9.38058	31.7926	15.7312
ENSG00000269313	MAGIX	0.55915	1.4734	0.173762	0.444359	9.95623	6.60638	14.6695	11.7436
ENSG00000250479	CHCHD10	0.558929	1.47318	0.158783	0.42645	29.7955	23.5275	43.894	31.6202
ENSG00000105248	YJU2	0.558271	1.4725	0.0141095	0.144486	13.3846	3.25525	19.7089	7.72641
ENSG00000137807	KIF23	0.558236	1.47247	0.158493	0.426439	17.927	14.8554	26.3969	13.5266
ENSG00000230295	GTF2IP23	0.557671	1.47189	0.204008	0.478503	0.734202	0.536108	1.08067	0.638931
ENSG00000177732	SOX12	0.55761	1.47183	0.103386	0.351589	35.7463	18.1013	52.6125	31.7901
ENSG00000117318	ID3	0.557381	1.4716	0.0983312	0.345625	29.1333	28.2564	42.8725	16.8369
ENSG00000135094	SDS	0.557049	1.47126	0.242205	0.521212	9.6825	9.53955	14.2454	8.9389
ENSG00000176953	NFATC2IP	0.557044	1.47125	0.00578918	0.104963	46.1052	16.1862	67.8323	16.7935
ENSG00000186493	C5orf38	0.556995	1.4712	0.452272	0.705595	8.59618	11.5267	12.6467	21.6302
ENSG00000105401	CDC37	0.556993	1.4712	0.00955909	0.125023	127.381	34.8826	187.403	63.3467
ENSG00000167930	FAM234A	0.556957	1.47116	0.0629809	0.277373	54.6462	29.3025	80.3934	40.385
ENSG00000130725	UBE2M	0.556927	1.47113	0.0240101	0.1776	57.6949	19.4068	84.8768	38.8445
ENSG00000111371	SLC38A1	0.556381	1.47058	0.213158	0.488855	106.852	67.2562	157.134	126.316
ENSG00000197905	TEAD4	0.556369	1.47056	0.0802305	0.311669	10.8399	6.30628	15.9408	7.6793
ENSG00000162551	ALPL	0.556299	1.47049	0.452888	0.7058	84.8693	121.42	124.8	225.947
ENSG00000181458	TMEM45A	0.556233	1.47042	0.182833	0.455809	18.563	13.2243	27.2955	23.9167
ENSG00000143224	PPOX	0.556142	1.47033	0.0168112	0.155057	15.6329	6.72372	22.9856	7.19592
ENSG00000110011	DNAJC4	0.55608	1.47027	0.0381272	0.219812	34.8445	13.823	51.2309	30.0308
ENSG00000100997	ABHD12	0.55562	1.4698	0.0165581	0.154813	81.007	26.6005	119.064	50.4103
ENSG00000161940	BCL6B	0.555246	1.46942	0.108055	0.357522	9.90478	7.33503	14.5543	8.4409
ENSG00000105726	ATP13A1	0.555029	1.4692	0.0136538	0.142538	71.1912	24.3156	104.594	33.1214
ENSG00000160959	LRRC14	0.55477	1.46893	0.0141359	0.144486	30.9082	12.5336	45.4021	14.0115
ENSG00000175455	CCDC14	0.55469	1.46885	0.0565859	0.263072	49.0855	30.5767	72.0994	29.0879
ENSG00000170476	MZB1	0.554496	1.46866	0.442883	0.697657	60.5034	105.518	88.8587	79.5351
ENSG00000146830	GIGYF1	0.554469	1.46863	0.083095	0.31714	77.2417	53.3676	113.439	47.7403
ENSG00000100263	RHBDD3	0.553757	1.4679	0.067213	0.287125	23.6726	16.8088	34.7491	12.2881
ENSG00000115274	INO80B	0.553664	1.46781	0.0623954	0.277137	2.97392	0.978579	4.36514	3.06577
ENSG00000118503	TNFAIP3	0.553538	1.46768	0.134252	0.393527	50.4551	34.426	74.0519	49.0061
ENSG00000184922	FMNL1	0.552944	1.46708	0.0642429	0.28005	41.2979	20.5229	60.5872	29.455
ENSG00000198851	CD3E	0.552587	1.46671	0.183441	0.456174	21.1592	16.189	31.0345	21.0888
ENSG00000167670	CHAF1A	0.552388	1.46651	0.0471047	0.241468	18.4576	10.119	27.0683	11.2625
ENSG00000281490	CICP14	0.55225	1.46637	0.192097	0.465652	6.82792	5.73664	10.0123	4.48002
ENSG00000180448	ARHGAP45	0.552144	1.46626	0.0644365	0.28005	65.5827	31.2375	96.1614	47.8871
ENSG00000088325	TPX2	0.552084	1.4662	0.192348	0.465668	55.2644	34.9041	81.0288	47.4405
ENSG00000184575	XPOT	0.5518	1.46591	0.0578045	0.266042	105.062	34.8969	154.012	100.032
ENSG00000204366	ZBTB12	0.551649	1.46576	0.106556	0.356422	5.80073	3.07403	8.50248	4.21167
ENSG00000111676	ATN1	0.551178	1.46528	0.0725824	0.297172	175.774	87.2029	257.558	134.629
ENSG00000104825	NFKBIB	0.550918	1.46502	0.025488	0.184388	24.3387	10.2493	35.6566	14.5706
ENSG00000140521	POLG	0.550035	1.46412	0.00809501	0.11793	42.3683	15.9033	62.0324	16.0641
ENSG00000230521	AL645929.1	0.549969	1.46405	0.119943	0.374683	2.55749	1.28048	3.74431	2.85164
ENSG00000105519	CAPS	0.54974	1.46382	0.224715	0.502726	38.2558	26.6872	55.9997	38.2398
ENSG00000021300	PLEKHB1	0.54914	1.46321	0.194762	0.467912	36.2302	32.8776	53.0125	36.6242
ENSG00000100416	TRMU	0.548551	1.46262	0.0374934	0.217994	24.7796	15.0289	36.2431	10.1059
ENSG00000177169	ULK1	0.548382	1.46245	0.0303966	0.198661	64.4505	35.1028	94.2553	23.7605
ENSG00000099821	POLRMT	0.548273	1.46233	0.0104421	0.129012	32.5793	11.0237	47.6419	14.4144
ENSG00000134905	CARS2	0.548199	1.46226	0.00934353	0.124012	34.4109	9.27475	50.3177	20.1512
ENSG00000167363	FN3K	0.547802	1.46186	0.0990972	0.345671	21.2436	13.8414	31.0552	15.4779
ENSG00000132326	PER2	0.547458	1.46151	0.0973536	0.343914	34.5	19.2858	50.422	24.3472
ENSG00000113504	SLC12A7	0.547436	1.46149	0.0778953	0.307461	138.425	68.2601	202.306	113.508
ENSG00000149483	TMEM138	0.547252	1.4613	0.00093118	0.0609687	24.5315	4.21378	35.8478	8.83691
ENSG00000173264	GPR137	0.54662	1.46066	0.0225889	0.172983	28.826	11.5887	42.105	15.5951
ENSG00000130734	ATG4D	0.546153	1.46019	0.0305701	0.199414	15.1089	5.13805	22.0618	10.3161
ENSG00000181274	FRAT2	0.545816	1.45985	0.0905153	0.332178	13.9648	8.51856	20.3864	11.188
ENSG00000183779	ZNF703	0.545625	1.45965	0.342149	0.614863	32.5441	50.6036	47.503	41.1082
ENSG00000148384	INPP5E	0.545003	1.45902	0.0409042	0.228029	15.0921	8.49839	22.0197	8.0899
ENSG00000061273	HDAC7	0.544924	1.45894	0.0244964	0.17979	87.7219	37.2466	127.981	47.8246
ENSG00000148450	MSRB2	0.54427	1.45828	0.0766612	0.305268	23.3587	9.39595	34.0635	24.5254
ENSG00000103254	ANTKMT	0.544127	1.45814	0.107141	0.356711	10.4734	6.80117	15.2716	8.77457
ENSG00000184916	JAG2	0.543774	1.45778	0.108988	0.359177	29.6882	15.8668	43.2789	20.8306
ENSG00000170037	CNTROB	0.543599	1.4576	0.0629189	0.277351	39.4068	29.4537	57.4396	27.4693
ENSG00000240771	ARHGEF25	0.542823	1.45682	0.141538	0.403693	11.7482	9.87285	17.115	10.0514
ENSG00000167987	VPS37C	0.542612	1.45661	0.00793564	0.117315	35.4074	12.0019	51.5747	16.2152
ENSG00000196547	MAN2A2	0.54248	1.45647	0.061161	0.274481	48.6766	26.9623	70.8962	33.6749
ENSG00000101220	C20orf27	0.542207	1.4562	0.0347494	0.211218	25.5602	10.5723	37.2208	15.8334
ENSG00000007376	RPUSD1	0.542115	1.45611	0.0503974	0.250426	22.5856	8.54945	32.887	20.5435
ENSG00000125534	PPDPF	0.541965	1.45595	0.0940136	0.337857	227.579	88.3384	331.345	248.763
ENSG00000149679	CABLES2	0.541681	1.45567	0.0353494	0.213527	16.3664	8.33031	23.824	8.01275
ENSG00000238142	BX284668.5	0.541578	1.45556	0.285981	0.564015	3.72265	4.28401	5.41855	6.01684
ENSG00000233461	AL445524.1	0.541357	1.45534	0.348357	0.619059	6.03518	6.72555	8.78324	11.1548
ENSG00000232640	AL354892.2	0.541322	1.45531	0.132996	0.391973	1.20487	0.743976	1.75345	0.91587
ENSG00000169026	SLC49A3	0.5412	1.45518	0.194109	0.467114	14.7048	10.7454	21.3981	21.9994
ENSG00000137573	SULF1	0.540973	1.45495	0.124761	0.382061	117.431	64.9669	170.856	118.852
ENSG00000184402	SS18L1	0.540918	1.4549	0.0197593	0.164181	22.8697	9.19068	33.2731	11.4589
ENSG00000178741	COX5A	0.540426	1.4544	0.0692747	0.291104	68.9571	36.6734	100.291	58.8273
ENSG00000203497	PDCD4-AS1	0.540351	1.45433	0.10028	0.34707	1.40137	1.0213	2.03805	1.044
ENSG00000163516	ANKZF1	0.540308	1.45428	0.0175352	0.157844	43.518	18.2155	63.2875	19.6409
ENSG00000158747	NBL1	0.540123	1.4541	0.204348	0.478811	50.3531	43.5255	73.2182	43.2588
ENSG00000178971	CTC1	0.539522	1.45349	0.0317016	0.201753	32.5845	13.8331	47.3613	18.4224
ENSG00000110446	SLC15A3	0.539449	1.45342	0.129663	0.388298	39.356	24.3195	57.2007	40.4573
ENSG00000106080	FKBP14	0.539427	1.45339	0.0714441	0.295526	22.3342	12.4968	32.4604	17.631
ENSG00000090273	NUDC	0.539392	1.45336	0.00710489	0.112825	103.751	25.326	150.788	53.9321
ENSG00000027869	SH2D2A	0.539391	1.45336	0.163227	0.430927	7.45373	4.69096	10.8329	7.9768
ENSG00000007545	CRAMP1	0.539386	1.45335	0.0445984	0.235005	17.4155	9.10341	25.3109	6.35341
ENSG00000147883	CDKN2B	0.53935	1.45332	0.339479	0.612072	19.0635	16.7288	27.7053	42.5409
ENSG00000254635	WAC-AS1	0.539233	1.4532	0.0194554	0.163683	22.3271	6.80704	32.4458	14.8479
ENSG00000104907	TRMT1	0.539034	1.453	0.0166614	0.154813	27.4439	9.75995	39.876	14.7085
ENSG00000142507	PSMB6	0.538812	1.45278	0.0518933	0.254032	77.7604	39.654	112.968	61.9089
ENSG00000142657	PGD	0.538666	1.45263	0.166914	0.436545	218.093	137.18	316.808	276.31
ENSG00000014138	POLA2	0.538608	1.45257	0.0369981	0.217478	23.0684	10.8032	33.5085	15.2435
ENSG00000149503	INCENP	0.538288	1.45225	0.0535289	0.257749	23.5535	10.8788	34.2055	16.5803
ENSG00000103528	SYT17	0.537926	1.45188	0.0814189	0.313917	21.4453	10.7708	31.136	15.579
ENSG00000154832	CXXC1	0.537865	1.45182	0.0611896	0.274481	37.6336	20.6415	54.6373	35.0202
ENSG00000111581	NUP107	0.536969	1.45092	0.0202838	0.166858	42.1956	15.5426	61.2225	25.1274
ENSG00000185246	PRPF39	0.53688	1.45083	0.00914219	0.122739	23.3025	6.8284	33.808	11.8058
ENSG00000225285	LINC01770	0.536845	1.4508	0.331449	0.604998	5.13633	6.71877	7.45177	7.49541
ENSG00000168488	ATXN2L	0.536671	1.45062	0.0281192	0.191408	144.122	62.9386	209.067	66.9064
ENSG00000188112	C6orf132	0.536561	1.45051	0.107778	0.357488	31.6538	17.3869	45.9142	33.4848
ENSG00000170909	OSCAR	0.536434	1.45038	0.187292	0.459254	8.93472	6.19502	12.9588	10.5504
ENSG00000162069	BICDL2	0.53642	1.45037	0.288554	0.566701	31.9416	43.3116	46.327	27.4872
ENSG00000170906	NDUFA3	0.536164	1.45011	0.0705418	0.293815	40.4127	14.9264	58.6029	46.8649
ENSG00000179094	PER1	0.536122	1.45007	0.215142	0.491333	90.2784	110.927	130.91	74.8792
ENSG00000101361	NOP56	0.535884	1.44983	0.034541	0.210651	92.1788	45.1871	133.644	47.5519
ENSG00000077044	DGKD	0.53481	1.44875	0.0769309	0.306009	51.4042	25.2388	74.4719	41.3315
ENSG00000009830	POMT2	0.534551	1.44849	0.053678	0.257973	21.1284	9.7403	30.6042	14.8392
ENSG00000137193	PIM1	0.534396	1.44834	0.0498659	0.249009	47.2893	21.511	68.4908	30.2472
ENSG00000136026	CKAP4	0.534252	1.44819	0.090143	0.331312	138.192	80.6567	200.128	105.46
ENSG00000128159	TUBGCP6	0.534217	1.44816	0.103019	0.351182	52.8286	34.2757	76.504	28.3832
ENSG00000276043	UHRF1	0.534016	1.44795	0.183118	0.456131	15.1441	12.0108	21.9279	14.049
ENSG00000170473	PYM1	0.533811	1.44775	0.0173043	0.157238	31.2601	9.65631	45.2567	20.1049
ENSG00000187778	MCRS1	0.533666	1.4476	0.00461971	0.0977699	51.5576	14.5813	74.635	19.9637
ENSG00000124181	PLCG1	0.533624	1.44756	0.0364829	0.216664	75.3147	35.6531	109.023	34.7005
ENSG00000101460	MAP1LC3A	0.533595	1.44753	0.210965	0.486264	16.4975	13.5558	23.8807	16.3123
ENSG00000203993	ARRDC1-AS1	0.533522	1.44746	0.0365038	0.216677	10.1999	4.89456	14.764	6.72838
ENSG00000115687	PASK	0.533513	1.44745	0.0579739	0.266305	21.2904	12.7982	30.8167	5.48472
ENSG00000082512	TRAF5	0.533139	1.44707	0.0623684	0.277137	26.0021	12.2525	37.6269	20.4969
ENSG00000065029	ZNF76	0.533004	1.44694	0.0119281	0.135446	34.156	13.1693	49.4217	18.0593
ENSG00000105556	MIER2	0.532877	1.44681	0.0485578	0.245318	20.1111	8.72866	29.097	9.8189
ENSG00000046651	OFD1	0.532784	1.44672	0.0872892	0.32576	35.6982	23.535	51.6452	26.8395
ENSG00000271503	CCL5	0.532599	1.44653	0.296599	0.572349	40.5597	45.974	58.6709	52.7819
ENSG00000253755	IGHGP	0.532345	1.44628	0.469586	0.716757	63.6944	103.701	92.1198	97.6274
ENSG00000278974	AC093909.6	0.532274	1.44621	0.0908432	0.333079	1.37155	0.61069	1.98354	1.00476
ENSG00000187583	PLEKHN1	0.532269	1.4462	0.305252	0.581324	7.70334	4.94707	11.1406	9.58651
ENSG00000142347	MYO1F	0.531858	1.44579	0.0739329	0.299816	29.7902	17.7439	43.0703	18.6349
ENSG00000185917	SETD4	0.530918	1.44485	0.0216141	0.170107	16.5366	6.55299	23.8929	7.70082
ENSG00000269386	RAB11B-AS1	0.53074	1.44467	0.066922	0.286598	2.224	1.19176	3.21294	1.18777
ENSG00000115112	TFCP2L1	0.530654	1.44458	0.323493	0.597335	50.8486	45.4052	73.4551	76.3524
ENSG00000203499	IQANK1	0.530599	1.44453	0.130183	0.388845	31.6925	15.7312	45.7808	30.4004
ENSG00000175221	MED16	0.530584	1.44451	0.0193673	0.163596	52.4216	19.1664	75.7238	26.2418
ENSG00000204435	CSNK2B	0.530441	1.44437	0.029286	0.195352	43.7083	17.1134	63.1311	29.3018
ENSG00000120256	LRP11	0.530225	1.44415	0.0718538	0.29588	56.9605	26.9237	82.2597	44.6602
ENSG00000020181	ADGRA2	0.529434	1.44336	0.0503075	0.250248	19.3291	7.22584	27.899	13.4983
ENSG00000155093	PTPRN2	0.52929	1.44322	0.490782	0.73146	26.1214	36.2458	37.6989	51.4238
ENSG00000211955	IGHV3-33	0.529154	1.44308	0.46708	0.715244	31.7667	40.8993	45.842	56.9425
ENSG00000205268	PDE7A	0.528651	1.44258	0.0984624	0.345625	36.5668	24.9851	52.7506	23.1464
ENSG00000002822	MAD1L1	0.528393	1.44232	0.0761706	0.30416	37.232	13.7811	53.7005	39.3534
ENSG00000130635	COL5A1	0.528301	1.44223	0.175555	0.446853	214.711	221.324	309.663	157.831
ENSG00000204839	MROH6	0.527985	1.44191	0.334225	0.607303	32.3751	28.2379	46.6821	44.8826
ENSG00000140995	DEF8	0.527771	1.4417	0.0119314	0.135446	43.3434	16.9177	62.4882	16.5919
ENSG00000124107	SLPI	0.527671	1.4416	0.43274	0.689729	172.765	153.61	249.058	418.168
ENSG00000214765	SEPTIN7P2	0.527622	1.44155	0.0172858	0.157238	8.70214	3.21466	12.5446	3.09298
ENSG00000184445	KNTC1	0.527417	1.44135	0.0728893	0.298009	33.0544	17.8188	47.6429	26.305
ENSG00000276023	DUSP14	0.527213	1.44114	0.0875769	0.326415	18.9973	10.1918	27.3778	15.3761
ENSG00000130201		0.526976	1.44091	0.0912988	0.333978	3.0767	1.92325	4.43324	1.7698
ENSG00000123130	ACOT9	0.526446	1.44038	0.0429682	0.232681	37.9989	13.4843	54.7328	32.091
ENSG00000149782	PLCB3	0.526359	1.44029	0.0454051	0.237428	44.3461	22.8973	63.8712	24
ENSG00000137513	NARS2	0.52631	1.44024	0.052562	0.255885	20.1767	4.92868	29.0593	20.0665
ENSG00000223745	CCDC18-AS1	0.52625	1.44018	0.119815	0.374618	14.1424	7.83925	20.3676	12.0705
ENSG00000243063	IGKV3-7	0.526045	1.43998	0.430814	0.687978	3.51906	4.35943	5.06736	5.56935
ENSG00000125901	MRPS26	0.525676	1.43961	0.151744	0.416581	45.1637	30.2255	65.0181	50.932
ENSG00000118418	HMGN3	0.525091	1.43902	0.0918669	0.334745	60.8348	31.9834	87.5427	51.7913
ENSG00000102048	ASB9	0.524932	1.43887	0.164455	0.432795	5.20144	4.35377	7.48418	4.53137
ENSG00000117308	GALE	0.523873	1.43781	0.0793477	0.310144	74.4207	30.6924	107.003	75.3356
ENSG00000141258	SGSM2	0.523534	1.43747	0.186279	0.45783	64.8292	70.8113	93.1901	56.9826
ENSG00000166598	HSP90B1	0.523527	1.43747	0.0443033	0.234725	899.139	252.196	1292.48	731.373
ENSG00000117399	CDC20	0.523332	1.43727	0.244496	0.523726	34.469	27.2828	49.5413	26.6868
ENSG00000173801	JUP	0.523292	1.43723	0.0823013	0.315704	310.592	183.041	446.392	163.518
ENSG00000155660	PDIA4	0.523289	1.43723	0.106524	0.356422	426.115	219.597	612.424	425.402
ENSG00000242887	IGHJ3	0.523218	1.43716	0.509193	0.74494	3.95767	5.65719	5.6878	7.23559
ENSG00000051523	CYBA	0.522532	1.43647	0.189468	0.461769	172.349	97.6021	247.574	224.04
ENSG00000278820		0.522452	1.43639	0.27544	0.553856	0.215146	0.194451	0.309035	0.180784
ENSG00000140577	CRTC3	0.52186	1.43581	0.0199259	0.164963	44.4887	13.4767	63.8771	28.8328
ENSG00000213190	MLLT11	0.521652	1.4356	0.458605	0.708825	22.6344	53.2857	32.4939	40.0105
ENSG00000161618	ALDH16A1	0.521367	1.43531	0.042413	0.231019	25.7292	11.8365	36.9294	12.4134
ENSG00000105618	PRPF31	0.521259	1.43521	0.0093153	0.124012	43.8315	12.6011	62.9073	21.4688
ENSG00000106263	EIF3B	0.521242	1.43519	0.0358083	0.214739	243.487	86.5255	349.45	193.794
ENSG00000114626	ABTB1	0.521175	1.43512	0.0653371	0.282617	29.4938	10.7046	42.3273	24.1586
ENSG00000172890	NADSYN1	0.520941	1.43489	0.0273301	0.189697	65.3002	27.9865	93.6987	39.83
ENSG00000108784	NAGLU	0.52074	1.43469	0.0666789	0.285872	46.1189	20.3304	66.1664	36.9329
ENSG00000103248	MTHFSD	0.520285	1.43424	0.0294875	0.195813	15.0645	6.3593	21.6061	7.14754
ENSG00000006025	OSBPL7	0.520063	1.43402	0.1734	0.443832	20.743	19.4715	29.7459	14.057
ENSG00000010327	STAB1	0.520007	1.43396	0.0858054	0.322498	58.5881	32.2792	84.0131	34.7651
ENSG00000141934	PLPP2	0.520006	1.43396	0.199507	0.473447	75.7765	42.5627	108.661	57.1335
ENSG00000175591	P2RY2	0.519951	1.43391	0.122855	0.3794	6.212	3.8504	8.90743	5.44147
ENSG00000227671	AL390728.4	0.519593	1.43355	0.0846805	0.320234	22.6102	13.8328	32.4129	13.6233
ENSG00000133316	WDR74	0.519562	1.43352	0.0118535	0.13527	24.8368	6.66652	35.6041	14.9211
ENSG00000108591	DRG2	0.519495	1.43345	0.00639278	0.108789	22.6466	6.1775	32.4629	9.88515
ENSG00000165215	CLDN3	0.519091	1.43305	0.34619	0.61795	94.592	79.3062	135.555	149.629
ENSG00000280816		0.518426	1.43239	0.188165	0.460328	0.865468	0.898758	1.23969	0.490393
ENSG00000058600	POLR3E	0.518277	1.43224	0.00555568	0.102982	38.8174	12.3371	55.596	13.7862
ENSG00000211772	TRBC2	0.518266	1.43223	0.250718	0.529647	21.2203	19.5314	30.3923	20.5323
ENSG00000100813	ACIN1	0.517979	1.43195	0.0329164	0.206258	154.486	64.9604	221.216	57.4673
ENSG00000160055	TMEM234	0.517281	1.43126	0.0340533	0.209402	14.189	6.45155	20.3081	8.09689
ENSG00000130023	ERMARD	0.516848	1.43083	0.0433307	0.233619	14.3883	6.70924	20.5871	10.1869
ENSG00000275964	AL355001.2	0.516328	1.43031	0.195184	0.468102	3.11278	1.96975	4.45223	3.65709
ENSG00000137497	NUMA1	0.516251	1.43023	0.0900668	0.331136	241.464	113.358	345.35	146.132
ENSG00000146826	MAP11	0.516171	1.43015	0.0736525	0.299704	24.807	15.3376	35.4779	15.6986
ENSG00000149743	TRPT1	0.515665	1.42965	0.0574341	0.265246	24.5181	10.8379	35.0524	18.261
ENSG00000130758	MAP3K10	0.515427	1.42942	0.103066	0.351198	14.7221	9.62581	21.044	11.8745
ENSG00000163913	IFT122	0.515251	1.42924	0.0327865	0.206067	23.5909	8.03737	33.7171	14.6043
ENSG00000160799	CCDC12	0.514697	1.42869	0.0352131	0.213198	30.9143	12.4798	44.1672	19.5815
ENSG00000051620	HEBP2	0.513941	1.42795	0.0535614	0.257749	41.8449	19.1171	59.7523	26.9059
ENSG00000151327	FAM177A1	0.513558	1.42757	0.158884	0.426526	77.4607	40.7006	110.58	99.9314
ENSG00000185000	DGAT1	0.513256	1.42727	0.076149	0.30416	46.6467	21.666	66.5773	40.9106
ENSG00000175115	PACS1	0.513072	1.42709	0.0518927	0.254032	130.754	67.4108	186.597	72.8022
ENSG00000064961	HMG20B	0.512952	1.42697	0.0277183	0.190223	52.4432	22.0127	74.8347	26.3314
ENSG00000103196	CRISPLD2	0.512688	1.42671	0.130863	0.389476	54.5993	48.4132	77.8971	36.61
ENSG00000160953	PWWP3A	0.512345	1.42637	0.0262892	0.186476	28.4755	11.1794	40.6165	13.7743
ENSG00000080189	SLC35C2	0.512087	1.42611	0.00739378	0.114294	62.7281	17.6883	89.4572	29.8979
ENSG00000128272	ATF4	0.511986	1.42601	0.0285397	0.192916	250.563	91.7655	357.306	124.113
ENSG00000131459	GFPT2	0.511899	1.42593	0.210721	0.485895	12.3492	9.33398	17.6091	10.1782
ENSG00000133392	MYH11	0.511732	1.42576	0.33613	0.609432	68.0109	71.6285	96.9673	101.314
ENSG00000160326	SLC2A6	0.511716	1.42575	0.17388	0.444435	9.41889	5.67682	13.4289	8.12715
ENSG00000137507	LRRC32	0.510705	1.42475	0.139137	0.400286	24.1067	20.4518	34.346	14.0116
ENSG00000105662	CRTC1	0.510667	1.42471	0.0573746	0.265246	18.24	11.0343	25.9867	7.94801
ENSG00000178605	GTPBP6	0.510631	1.42467	0.0330336	0.206603	37.9581	15.5997	54.0779	19.1075
ENSG00000198858	R3HDM4	0.51062	1.42466	0.032317	0.204218	80.4244	32.2971	114.578	47.7065
ENSG00000103148	NPRL3	0.510394	1.42444	0.0285862	0.193086	41.7703	17.9569	59.4993	18.3341
ENSG00000111679	PTPN6	0.510154	1.4242	0.00495543	0.100227	68.1691	17.423	97.0866	29.7209
ENSG00000142634	EFHD2	0.509861	1.42391	0.0393029	0.222946	103.732	48.1904	147.705	61.2909
ENSG00000007312	CD79B	0.509629	1.42368	0.401323	0.665327	9.43135	13.3377	13.4273	11.9823
ENSG00000198736	MSRB1	0.509085	1.42315	0.22014	0.497656	54.5589	39.3182	77.6454	69.7126
ENSG00000107404	DVL1	0.50867	1.42274	0.114542	0.366788	80.5671	33.2539	114.626	85.0275
ENSG00000127084	FGD3	0.508608	1.42268	0.108023	0.357522	12.8376	7.58624	18.2638	8.70013
ENSG00000169180	XPO6	0.508555	1.42262	0.00771596	0.116038	98.5453	35.733	140.193	21.5478
ENSG00000168395	ING5	0.507636	1.42172	0.025505	0.184396	20.749	7.86614	29.4992	9.02271
ENSG00000145214	DGKQ	0.507272	1.42136	0.117122	0.370262	25.463	16.4234	36.1921	14.9754
ENSG00000133466	C1QTNF6	0.506576	1.42067	0.190201	0.462721	24.3499	14.8077	34.5933	27.8911
ENSG00000196510	ANAPC7	0.506385	1.42049	0.00490335	0.100227	46.3293	8.3942	65.8102	21.3969
ENSG00000211632	IGKV3D-11	0.505917	1.42003	0.523401	0.753886	4.78522	6.72033	6.79514	8.12992
ENSG00000204301	NOTCH4	0.505794	1.4199	0.110404	0.360277	19.6592	13.334	27.9142	13.4746
ENSG00000022567	SLC45A4	0.505378	1.4195	0.0737078	0.299704	32.5671	12.8061	46.2288	31.5641
ENSG00000068745	IP6K2	0.505323	1.41944	0.0128981	0.13992	55.0865	17.7776	78.1921	25.6922
ENSG00000099331	MYO9B	0.505221	1.41934	0.0380811	0.219735	90.7642	41.1554	128.825	42.0265
ENSG00000182872	RBM10	0.504978	1.4191	0.0140816	0.144486	52.8636	16.0321	75.0188	21.3318
ENSG00000104951	IL4I1	0.504923	1.41905	0.265648	0.54593	15.6557	11.3758	22.2162	14.9179
ENSG00000273271	AP000254.2	0.503793	1.41794	0.0993976	0.345671	1.15143	0.670911	1.63265	0.54254
ENSG00000056558	TRAF1	0.503414	1.41756	0.128259	0.387078	25.3027	18.0607	35.8681	18.7242
ENSG00000224041	IGKV3D-15	0.50336	1.41751	0.491593	0.731569	4.09527	5.90602	5.80509	7.80459
ENSG00000130775	THEMIS2	0.502778	1.41694	0.116213	0.368815	47.9099	30.2502	67.8853	27.5685
ENSG00000273802	H2BC8	0.502707	1.41687	0.437594	0.69277	2.81821	3.00469	3.99304	4.30684
ENSG00000204673	AKT1S1	0.502555	1.41672	0.0143484	0.145437	42.2433	15.5997	59.847	18.6704
ENSG00000104980	TIMM44	0.502443	1.41661	0.0167639	0.154985	26.4512	9.08906	37.471	13.9861
ENSG00000156504	FAM122B	0.502072	1.41625	0.02794	0.190706	38.7094	16.2313	54.822	15.8958
ENSG00000111321	LTBR	0.502047	1.41622	0.0681271	0.289416	135.016	58.0315	191.212	92.9047
ENSG00000048462	TNFRSF17	0.502016	1.41619	0.494767	0.733549	4.93665	7.81088	6.99124	7.92694
ENSG00000119640	ACYP1	0.501662	1.41584	0.0540479	0.259216	5.1253	2.48808	7.25662	2.75189
ENSG00000215305	VPS16	0.50145	1.41564	0.0194581	0.163683	33.288	11.9337	47.1236	13.8094
ENSG00000140406	TLNRD1	0.501248	1.41544	0.0227901	0.173516	25.1764	9.15665	35.6356	12.2129
ENSG00000188493	C19orf54	0.500746	1.41495	0.0294086	0.195721	16.2899	6.85144	23.0493	7.32424
ENSG00000159403	C1R	0.500668	1.41487	0.121847	0.377409	219.588	114.221	310.688	178.634
ENSG00000148341	SH3GLB2	0.500583	1.41478	0.075509	0.30355	69.9089	33.0301	98.9061	56.4879
ENSG00000173432	SAA1	0.500065	1.41428	0.478651	0.722258	11.4684	11.7222	16.2194	29.376
ENSG00000198125	MB	0.49984	1.41406	0.443935	0.69858	10.0813	11.3094	14.2555	13.6455
ENSG00000141447	OSBPL1A	0.4996	1.41382	0.184207	0.456951	26.9459	11.6626	38.0967	45.3847
ENSG00000137070	IL11RA	0.498985	1.41322	0.0490444	0.246914	8.46746	4.59541	11.9664	3.23893
ENSG00000084731	KIF3C	0.498946	1.41318	0.271832	0.550897	20.6335	19.9307	29.1588	17.6783
ENSG00000143179	UCK2	0.498466	1.41271	0.282199	0.56112	28.7887	25.7706	40.6702	29.97
ENSG00000227097	RPS28P7	0.498234	1.41248	0.341465	0.614321	50.6765	33.5421	71.5797	51.7496
ENSG00000161798	AQP5	0.49794	1.4122	0.706443	0.867679	95.9232	128.506	135.462	473.954
ENSG00000139546	TARBP2	0.497745	1.41201	0.038979	0.221757	28.3651	12.6852	40.0516	13.6664
ENSG00000173914	RBM4B	0.497664	1.41193	0.0188503	0.161718	14.3933	4.49524	20.3223	5.87464
ENSG00000171045	TSNARE1	0.497579	1.41184	0.104936	0.353545	13.4671	7.32839	19.0134	9.66346
ENSG00000229344	MTCO2P12	0.497465	1.41173	0.322086	0.596134	2.20942	1.94677	3.11911	3.31924
ENSG00000187210	GCNT1	0.497127	1.4114	0.379082	0.645481	23.6527	36.7506	33.3835	45.2175
ENSG00000180758	GPR157	0.496898	1.41118	0.0731724	0.298785	26.0154	11.3655	36.7123	19.3846
ENSG00000142235	LMTK3	0.496219	1.41051	0.246775	0.525181	11.2773	7.87093	15.9068	11.2718
ENSG00000101294	HM13	0.496001	1.4103	0.062906	0.277351	206.018	56.6152	290.547	206.376
ENSG00000103245	CIAO3	0.49553	1.40984	0.0234697	0.176592	24.2346	8.55684	34.1669	12.8795
ENSG00000161036	LRWD1	0.495492	1.4098	0.0731817	0.298785	26.6785	8.41685	37.6113	21.1458
ENSG00000181924	COA4	0.495458	1.40977	0.0706266	0.293815	48.9604	15.4493	69.0228	51.9439
ENSG00000137221	TJAP1	0.495057	1.40938	0.0100785	0.127681	32.3233	10.9538	45.5557	12.2082
ENSG00000110080	ST3GAL4	0.494453	1.40879	0.0706124	0.293815	27.5489	12.3643	38.8106	27.2942
ENSG00000103197	TSC2	0.494394	1.40873	0.0332079	0.207042	89.0289	39.1179	125.418	33.4443
ENSG00000109736	MFSD10	0.494367	1.4087	0.107417	0.357066	89.778	57.9533	126.47	62.1908
ENSG00000153066	TXNDC11	0.494227	1.40857	0.0176288	0.157844	100.989	21.2194	142.25	64.9203
ENSG00000115963	RND3	0.49362	1.40797	0.280516	0.55959	31.8138	26.6807	44.7929	36.85
ENSG00000162231	NXF1	0.493612	1.40797	0.0216123	0.170107	67.5827	29.2149	95.1541	25.7531
ENSG00000231292	IGKV1OR2-108	0.493457	1.40781	0.554276	0.773311	6.29441	9.5511	8.86136	9.72304
ENSG00000173272	MZT2A	0.49305	1.40742	0.17651	0.448207	22.7491	13.3249	32.0175	25.7631
ENSG00000102970	CCL17	0.492779	1.40715	0.480188	0.723007	3.51387	4.49983	4.94455	6.96148
ENSG00000121152	NCAPH	0.492534	1.40691	0.185306	0.457528	13.0726	7.87548	18.392	8.69172
ENSG00000197948	FCHSD1	0.491749	1.40615	0.093224	0.336777	21.9949	16.448	30.9281	10.0745
ENSG00000064932	SBNO2	0.491499	1.40591	0.0683288	0.289655	109.325	63.1771	153.7	62.468
ENSG00000175334	BANF1	0.491222	1.40563	0.0289873	0.193804	104.083	38.2741	146.302	48.3186
ENSG00000152464	RPP38	0.490619	1.40505	0.0453562	0.237279	12.7449	3.10221	17.9071	9.67511
ENSG00000107223	EDF1	0.49053	1.40496	0.0697094	0.292122	190.527	60.7243	267.683	189.014
ENSG00000174365	SNHG11	0.489839	1.40429	0.0761443	0.30416	9.43036	4.03281	13.2429	5.95814
ENSG00000059122	FLYWCH1	0.4897	1.40415	0.0716176	0.295753	32.0277	17.558	44.9718	19.3895
ENSG00000105771	SMG9	0.489659	1.40411	0.0147347	0.147178	36.7087	12.6001	51.5431	16.0129
ENSG00000125871	MGME1	0.489491	1.40395	0.023623	0.17683	21.7949	7.96053	30.5989	10.7088
ENSG00000140750	ARHGAP17	0.489136	1.4036	0.0109824	0.130555	40.1496	14.2046	56.3542	14.0166
ENSG00000138002	IFT172	0.488924	1.4034	0.0877234	0.326647	26.8184	16.6979	37.6368	12.1454
ENSG00000110195	FOLR1	0.488857	1.40333	0.425476	0.684525	105.862	104.533	148.56	141.969
ENSG00000126005	MMP24OS	0.488579	1.40306	0.0711673	0.295115	39.4414	16.181	55.3388	33.7914
ENSG00000151366	NDUFC2	0.488552	1.40304	0.167699	0.437226	37.3228	21.7791	52.3652	57.6151
ENSG00000134461	ANKRD16	0.487452	1.40197	0.0890549	0.329092	6.46742	2.69595	9.06711	5.28563
ENSG00000153786	ZDHHC7	0.487166	1.40169	0.039709	0.224703	69.0938	23.2762	96.848	41.7043
ENSG00000061936	SFSWAP	0.487127	1.40165	0.0391529	0.222529	41.5324	15.905	58.2139	24.4178
ENSG00000116337	AMPD2	0.487106	1.40163	0.0141383	0.144486	46.0188	13.4814	64.5014	19.5192
ENSG00000155363	MOV10	0.486922	1.40145	0.0208686	0.168121	66.1324	26.179	92.6814	27.6681
ENSG00000183484	GPR132	0.486827	1.40136	0.178756	0.450372	8.89034	4.46898	12.4586	9.42721
ENSG00000237883	DGUOK-AS1	0.48671	1.40125	0.169204	0.438823	1.61499	0.947037	2.263	1.61719
ENSG00000106366	SERPINE1	0.486608	1.40115	0.414529	0.676439	116.637	217.271	163.425	161.044
ENSG00000100767	PAPLN	0.486357	1.4009	0.205391	0.479829	22.8348	15.9027	31.9894	21.9836
ENSG00000171703	TCEA2	0.486064	1.40062	0.0558129	0.262066	21.839	8.41663	30.588	13.2037
ENSG00000111961	SASH1	0.485636	1.4002	0.208497	0.483434	28.3173	19.0006	39.65	29.7027
ENSG00000229320	KRT8P12	0.485595	1.40016	0.0822979	0.315704	5.63014	2.84294	7.88311	3.10743
ENSG00000131873	CHSY1	0.48532	1.3999	0.146718	0.40985	43.7919	18.3665	61.3042	59.0285
ENSG00000132716	DCAF8	0.485162	1.39974	0.015721	0.152223	61.4043	22.2479	85.9503	20.9073
ENSG00000148334	PTGES2	0.484829	1.39942	0.0817706	0.314752	47.1582	19.3167	65.9941	45.0638
ENSG00000102225	CDK16	0.48476	1.39935	0.0830525	0.31714	109.026	62.0516	152.566	69.722
ENSG00000065717	TLE2	0.484094	1.39871	0.182035	0.45491	42.5502	32.5328	59.5152	39.1067
ENSG00000088970	KIZ	0.484082	1.3987	0.0501188	0.249843	10.9509	4.11514	15.3169	5.84386
ENSG00000071859	FAM50A	0.484041	1.39866	0.0830413	0.31714	94.1021	40.4948	131.616	69.7352
ENSG00000136444	RSAD1	0.483902	1.39852	0.00660625	0.109591	29.9365	7.64346	41.8669	10.8338
ENSG00000080031	PTPRH	0.48307	1.39771	0.39429	0.659142	10.5942	8.61895	14.8076	14.6748
ENSG00000142910	TINAGL1	0.482247	1.39692	0.292447	0.569154	40.6791	26.7048	56.8253	79.1189
ENSG00000182372	CLN8	0.482141	1.39681	0.0560719	0.262678	20.5626	8.59275	28.7222	15.903
ENSG00000131797	CLUHP3	0.482125	1.3968	0.265502	0.545919	17.4684	17.8269	24.3999	10.689
ENSG00000116649	SRM	0.482003	1.39668	0.0909531	0.333237	68.2739	32.7788	95.3568	42.9341
ENSG00000130300	PLVAP	0.481944	1.39662	0.0926837	0.335982	69.2176	39.5889	96.6709	40.9098
ENSG00000169231	THBS3	0.481564	1.39626	0.0693021	0.291114	33.1914	16.0969	46.3437	16.1846
ENSG00000135441	BLOC1S1	0.481472	1.39617	0.128993	0.387604	27.3959	16.6626	38.2493	29.0019
ENSG00000176945	MUC20	0.481235	1.39594	0.478508	0.722204	62.1746	86.5272	86.792	170.926
ENSG00000185477	GPRIN3	0.481138	1.39584	0.294316	0.570351	31.868	26.3136	44.4828	34.4971
ENSG00000145506	NKD2	0.481108	1.39582	0.196871	0.46984	10.819	6.80945	15.1013	9.87302
ENSG00000130347	RTN4IP1	0.480864	1.39558	0.0560753	0.262678	5.6778	1.95773	7.92382	4.48768
ENSG00000226742	HSBP1L1	0.480529	1.39526	0.203434	0.478429	17.463	10.2196	24.3653	25.7344
ENSG00000211947	IGHV3-21	0.480262	1.395	0.544469	0.767173	81.7602	155.584	114.055	151.75
ENSG00000104969	SGTA	0.480203	1.39494	0.00494782	0.100227	61.4006	11.677	85.6501	25.4209
ENSG00000182944	EWSR1	0.479801	1.39455	0.00631962	0.108177	197.198	55.2861	275.003	49.6597
ENSG00000114631	PODXL2	0.479285	1.39405	0.374118	0.641723	45.418	32.1322	63.3151	60.3163
ENSG00000012822	CALCOCO1	0.478869	1.39365	0.0543788	0.259733	59.7665	30.763	83.2936	21.3946
ENSG00000184209	SNRNP35	0.478735	1.39352	0.0564218	0.263072	17.3964	6.57595	24.2423	15.5476
ENSG00000055044	NOP58	0.478082	1.39289	0.0208604	0.168121	69.3498	21.8068	96.5967	32.2104
ENSG00000198466	ZNF587	0.478013	1.39282	0.0867273	0.324287	19.9061	10.1559	27.7258	12.7575
ENSG00000107937	GTPBP4	0.477265	1.3921	0.065526	0.282804	63.7958	24.4868	88.8103	52.5952
ENSG00000201772	SNORA5C	0.477233	1.39207	0.277363	0.556063	0.403504	0.53047	0.561706	0.162563
ENSG00000163874	ZC3H12A	0.476867	1.39172	0.115365	0.367982	24.6705	13.3142	34.3344	18.1295
ENSG00000042286	AIFM2	0.47685	1.3917	0.0805308	0.312044	29.5643	11.6327	41.1447	27.4772
ENSG00000105229	PIAS4	0.476825	1.39168	0.0138066	0.143278	17.9366	5.52628	24.9619	6.18164
ENSG00000089693	MLF2	0.47676	1.39161	0.0757049	0.30355	180.933	81.8537	251.789	121.884
ENSG00000130590	SAMD10	0.476693	1.39155	0.0884537	0.327938	12.2721	6.63546	17.0772	6.85974
ENSG00000270647	TAF15	0.476327	1.3912	0.0795047	0.310653	117.174	56.5081	163.012	63.0322
ENSG00000260025	CRIM1-DT	0.476032	1.39091	0.31287	0.589512	0.959676	0.680733	1.33483	0.99538
ENSG00000197586	ENTPD6	0.475472	1.39037	0.0195992	0.16373	80.954	25.9108	112.556	33.453
ENSG00000171848	RRM2	0.475391	1.3903	0.329382	0.60293	60.5872	45.3126	84.2341	80.3039
ENSG00000145545	SRD5A1	0.475372	1.39028	0.287933	0.565947	25.4621	17.6595	35.3994	46.1917
ENSG00000185585	OLFML2A	0.474864	1.38979	0.130659	0.389269	18.8985	11.1582	26.2649	13.792
ENSG00000110619	CARS1	0.47474	1.38967	0.0147431	0.147178	51.5951	14.8734	71.7001	23.5348
ENSG00000173846	PLK3	0.474602	1.38954	0.0777304	0.307018	18.5582	8.81452	25.7873	11.7111
ENSG00000126001	CEP250	0.4745	1.38944	0.0746091	0.30165	49.7645	21.0726	69.1446	23.3351
ENSG00000274104	AC020910.5	0.473635	1.3886	0.268987	0.548915	1.53246	1.29803	2.12798	2.04768
ENSG00000151468	CCDC3	0.473345	1.38832	0.210245	0.485621	12.8383	9.79389	17.8238	9.91864
ENSG00000277782	AC068870.2	0.473339	1.38832	0.0918706	0.334745	0.807191	0.352336	1.12064	0.460923
ENSG00000126012	KDM5C	0.473095	1.38808	0.0847394	0.320353	127.373	60.9081	176.805	73.0148
ENSG00000125755	SYMPK	0.472806	1.38781	0.0227176	0.173486	89.1429	35.0259	123.713	29.5089
ENSG00000141503	MINK1	0.472592	1.3876	0.026815	0.18806	80.6929	29.0842	111.969	33.3076
ENSG00000136699	SMPD4	0.472455	1.38747	0.0257411	0.184759	65.3173	23.6196	90.6256	27.0499
ENSG00000188783	PRELP	0.472375	1.38739	0.273058	0.551708	58.2427	37.5977	80.8055	63.8677
ENSG00000119333	WDR34	0.472268	1.38729	0.151376	0.41599	75.503	44.5655	104.744	73.3325
ENSG00000125814	NAPB	0.471973	1.38701	0.0823787	0.315704	13.348	6.66924	18.5137	7.40353
ENSG00000280128	AL662795.2	0.471872	1.38691	0.209877	0.48534	7.44675	5.389	10.328	4.62758
ENSG00000205336	ADGRG1	0.471741	1.38678	0.168621	0.438541	160.271	121.028	222.261	77.5775
ENSG00000100650	SRSF5	0.471556	1.3866	0.0163775	0.15411	136.469	46.3391	189.229	46.9638
ENSG00000204282	TNRC6C-AS1	0.470571	1.38566	0.131278	0.389616	11.0825	5.78121	15.3565	7.5443
ENSG00000065154	OAT	0.47025	1.38535	0.134734	0.394246	118.553	61.3332	164.237	107.075
ENSG00000118939	UCHL3	0.470167	1.38527	0.0827939	0.316805	6.95566	3.35998	9.63547	4.40443
ENSG00000214753	HNRNPUL2	0.469948	1.38506	0.0678966	0.288964	59.8327	25.9731	82.8718	23.8175
ENSG00000168000	BSCL2	0.469776	1.38489	0.0364635	0.216664	9.36433	3.33079	12.9686	3.9944
ENSG00000137501	SYTL2	0.469556	1.38468	0.292024	0.569154	38.6407	20.9479	53.5051	65.0525
ENSG00000207383	AC012442.1	0.469422	1.38455	0.121711	0.377189	0.358163	0.157868	0.495896	0.189728
ENSG00000165915	SLC39A13	0.469176	1.38432	0.0174803	0.157811	48.9128	15.6233	67.7109	21.2046
ENSG00000103534	TMC5	0.469166	1.38431	0.297347	0.573033	142.769	106.671	197.636	136.156
ENSG00000144554	FANCD2	0.469026	1.38417	0.139952	0.401361	17.5848	8.33162	24.3405	19.1473
ENSG00000142945	KIF2C	0.468734	1.38389	0.292475	0.569154	25.1338	19.0639	34.7826	21.8862
ENSG00000126432	PRDX5	0.468427	1.3836	0.112206	0.362896	245.442	99.5766	339.594	209.083
ENSG00000226328	NUP50-DT	0.468295	1.38347	0.209069	0.484291	7.86042	5.8706	10.8747	6.33858
ENSG00000173064	HECTD4	0.468018	1.38321	0.154282	0.420179	62.8302	30.8346	86.9073	56.2216
ENSG00000105810	CDK6	0.467557	1.38277	0.215263	0.491403	28.75	17.0986	39.7545	28.2666
ENSG00000167733	HSD11B1L	0.467468	1.38268	0.152382	0.417112	5.64046	2.29116	7.79895	5.17286
ENSG00000213563	C8orf82	0.467052	1.38228	0.17834	0.450099	21.7345	14.3208	30.0432	23.696
ENSG00000160410	SHKBP1	0.466854	1.38209	0.0721571	0.296264	76.1572	27.4645	105.256	68.3221
ENSG00000130726	TRIM28	0.466786	1.38203	0.0543373	0.259733	260.774	94.3064	360.397	167.663
ENSG00000142156	COL6A1	0.466739	1.38198	0.188064	0.460273	268.427	192.439	370.961	266.686
ENSG00000160360	GPSM1	0.466707	1.38195	0.204936	0.479392	19.6312	10.5148	27.1293	22.289
ENSG00000106211	HSPB1	0.466517	1.38177	0.246335	0.524865	436.762	288.386	603.504	378.614
ENSG00000090565	RAB11FIP3	0.466432	1.38169	0.149311	0.413866	41.7487	25.1007	57.6837	22.2342
ENSG00000260708	AL118516.1	0.465881	1.38116	0.226548	0.5045	3.17982	2.77426	4.39183	2.43389
ENSG00000280789	PAGR1	0.465484	1.38078	0.0635389	0.278566	6.84483	3.50543	9.45121	2.56724
ENSG00000130475	FCHO1	0.465479	1.38078	0.271046	0.550574	11.341	8.20917	15.6594	9.7629
ENSG00000182541	LIMK2	0.465381	1.38068	0.0541577	0.259422	54.0362	27.4436	74.6068	25.3583
ENSG00000134884	ARGLU1	0.465119	1.38043	0.072359	0.296675	61.325	35.4095	84.6549	15.3554
ENSG00000119986	AVPI1	0.464728	1.38006	0.184784	0.457294	17.5451	10.9742	24.2133	16.7508
ENSG00000186810	CXCR3	0.464565	1.3799	0.346708	0.618042	6.99495	5.67535	9.65234	8.62789
ENSG00000175582	RAB6A	0.464542	1.37988	0.0803416	0.311669	138.335	36.0509	190.886	131.63
ENSG00000134590	RTL8C	0.464472	1.37981	0.0719297	0.295975	63.2374	27.4913	87.2557	36.3892
ENSG00000138709	LARP1B	0.464221	1.37957	0.0470466	0.241456	22.1687	6.52133	30.5834	14.7394
ENSG00000244734	HBB	0.463839	1.37921	0.504959	0.742107	31.5463	32.5383	43.5088	64.4682
ENSG00000104866	PPP1R37	0.463757	1.37913	0.108815	0.358924	44.8918	26.1525	61.9115	30.5309
ENSG00000087460	GNAS	0.463554	1.37893	0.0829712	0.31714	1011.19	505.232	1394.37	711.781
ENSG00000141380	SS18	0.463457	1.37884	0.10077	0.347531	67.7074	33.7634	93.3578	42.8674
ENSG00000103024	NME3	0.463294	1.37869	0.215148	0.491333	40.104	24.5751	55.2908	53.8456
ENSG00000134324	LPIN1	0.463291	1.37868	0.0301171	0.197612	41.1167	13.8027	56.6869	16.9803
ENSG00000125347	IRF1	0.463251	1.37864	0.123533	0.380008	72.346	31.5933	99.7394	70.5096
ENSG00000167766	ZNF83	0.463056	1.37846	0.037444	0.217924	28.5679	11.6924	39.3797	13.3421
ENSG00000101181	MTG2	0.463036	1.37844	0.0403448	0.226538	29.7109	10.8977	40.9547	14.6794
ENSG00000113368	LMNB1	0.462908	1.37832	0.18558	0.457653	43.3511	28.9222	59.7515	46.6765
ENSG00000261455	LINC01003	0.462759	1.37817	0.0825283	0.315997	5.13986	2.2103	7.08363	2.9203
ENSG00000114857	NKTR	0.462293	1.37773	0.169073	0.438797	75.2113	57.9741	103.621	31.7008
ENSG00000135931	ARMC9	0.461799	1.37726	0.211076	0.486423	25.5413	9.4535	35.177	39.29
ENSG00000258890	CEP95	0.461504	1.37698	0.0106269	0.129514	25.7329	7.12736	35.4336	8.83478
ENSG00000095370	SH2D3C	0.46146	1.37693	0.147908	0.411682	14.1478	9.38704	19.4806	10.6134
ENSG00000163050	COQ8A	0.461035	1.37653	0.127729	0.386372	40.7417	16.048	56.0821	46.4139
ENSG00000145113	MUC4	0.460904	1.3764	0.593001	0.79757	147.851	262.469	203.502	212.084
ENSG00000159063	ALG8	0.460851	1.37635	0.05248	0.2557	40.2043	9.99136	55.3353	34.452
ENSG00000176248	ANAPC2	0.460529	1.37605	0.0602135	0.271977	38.4689	17.4873	52.935	19.7863
ENSG00000226950	DANCR	0.460254	1.37578	0.140429	0.402114	21.7322	10.6437	29.8987	19.0387
ENSG00000089280	FUS	0.460195	1.37573	0.0505863	0.250468	284.543	129.14	391.454	73.1965
ENSG00000165912	PACSIN3	0.460068	1.37561	0.265975	0.54612	33.0957	25.7152	45.5267	30.2262
ENSG00000273576	AC009283.1	0.459933	1.37548	0.212168	0.488166	3.2997	2.34904	4.53867	2.63207
ENSG00000225138	SLC9A3-AS1	0.459809	1.37536	0.422971	0.68228	13.9401	15.4096	19.1727	20.505
ENSG00000189159	JPT1	0.459646	1.3752	0.225387	0.503649	125.969	81.786	173.233	117.923
ENSG00000112576	CCND3	0.459613	1.37517	0.314938	0.591461	102.575	61.3859	141.058	227.434
ENSG00000127415	IDUA	0.459605	1.37516	0.269718	0.549743	20.0702	18.0194	27.5999	16.2485
ENSG00000058085	LAMC2	0.459596	1.37516	0.453785	0.706063	199.78	179.082	274.729	488.36
ENSG00000167578	RAB4B	0.459079	1.37466	0.0775859	0.306655	14.1973	7.47177	19.5165	7.77704
ENSG00000100034	PPM1F	0.458822	1.37442	0.0474199	0.242623	28.3103	8.90613	38.9102	18.7774
ENSG00000123815	COQ8B	0.458545	1.37416	0.0715762	0.295753	34.9789	16.3826	48.0665	22.6515
ENSG00000197562	RAB40C	0.458422	1.37404	0.135012	0.394561	48.4791	29.7139	66.6121	33.0339
ENSG00000130175	PRKCSH	0.458374	1.37399	0.0307354	0.199602	264.465	94.8418	363.373	98.1058
ENSG00000105617	LENG1	0.458222	1.37385	0.0711521	0.295115	7.46137	2.48483	10.2508	4.59233
ENSG00000272655	POLR2J4	0.457998	1.37363	0.0730501	0.298562	2.72414	1.36967	3.74197	1.1364
ENSG00000233493	TMEM238	0.457967	1.3736	0.351532	0.621765	5.79107	5.50998	7.95464	7.40798
ENSG00000128602	SMO	0.457922	1.37356	0.319604	0.59447	12.3282	14.6278	16.9336	10.9024
ENSG00000178531	CTXN1	0.457552	1.37321	0.389158	0.654407	7.34471	5.70193	10.0858	9.28537
ENSG00000186312	CA5BP1	0.457385	1.37305	0.0741867	0.300255	5.77088	2.09691	7.92371	3.52464
ENSG00000130703	OSBPL2	0.457127	1.37281	0.0293419	0.195583	66.9713	22.8277	91.9386	32.6649
ENSG00000071564	TCF3	0.45688	1.37257	0.0269952	0.188351	70.0869	25.7494	96.1991	30.7818
ENSG00000167680	SEMA6B	0.456812	1.37251	0.123025	0.379539	9.92061	5.94551	13.6161	4.64837
ENSG00000122641	INHBA	0.456041	1.37177	0.26441	0.545215	34.1773	19.2696	46.8834	32.6173
ENSG00000105443	CYTH2	0.455852	1.37159	0.0642346	0.28005	64.3507	38.0527	88.263	29.7188
ENSG00000181027	FKRP	0.45581	1.37155	0.0361709	0.215627	13.6317	5.95746	18.6965	4.29461
ENSG00000161999	JMJD8	0.455806	1.37155	0.127506	0.385862	40.4195	17.5995	55.4373	33.3976
ENSG00000159899	NPR2	0.455775	1.37152	0.170412	0.440185	8.96515	4.79675	12.2959	7.16083
ENSG00000117480	FAAH	0.455719	1.37147	0.230877	0.509441	24.2071	17.172	33.1992	22.9281
ENSG00000267317	AC027307.2	0.455705	1.37145	0.148337	0.412238	4.09654	2.31715	5.61821	2.36529
ENSG00000137642	SORL1	0.455693	1.37144	0.392662	0.657827	153.427	128.224	210.416	302.931
ENSG00000059377	TBXAS1	0.455663	1.37141	0.121639	0.377166	25.5348	12.1847	35.0188	19.262
ENSG00000054965	FAM168A	0.455662	1.37141	0.128068	0.386996	63.1359	24.9621	86.5853	70.1436
ENSG00000101928	MOSPD1	0.455249	1.37102	0.294969	0.570793	20.6861	12.1341	28.361	44.6085
ENSG00000184967	NOC4L	0.455135	1.37091	0.046509	0.240559	19.356	6.55919	26.5354	10.4367
ENSG00000177706	FAM20C	0.455037	1.37082	0.123554	0.380008	47.0233	21.1661	64.4604	32.7634
ENSG00000165698	SPACA9	0.455021	1.3708	0.141705	0.40374	7.84872	2.22304	10.759	7.47153
ENSG00000187954	CYHR1	0.454996	1.37078	0.0851412	0.321128	58.3098	28.3796	79.9299	39.9675
ENSG00000091651	ORC6	0.45494	1.37073	0.232657	0.510529	8.85833	6.03474	12.1423	5.60883
ENSG00000205593	DENND6B	0.454869	1.37066	0.166754	0.436282	15.8649	9.89025	21.7454	10.317
ENSG00000166484	MAPK7	0.454792	1.37058	0.0256625	0.184759	16.9833	6.24413	23.2771	6.14632
ENSG00000211652	IGLV7-43	0.454756	1.37055	0.577783	0.788791	12.6776	24.6003	17.3753	20.7576
ENSG00000181031	RPH3AL	0.45475	1.37054	0.137287	0.397223	21.0735	10.6643	28.8822	15.5562
ENSG00000184602	SNN	0.454532	1.37034	0.115243	0.367866	39.9169	15.5625	54.6996	36.0644
ENSG00000100124	ANKRD54	0.454183	1.37001	0.0284833	0.192647	19.9875	6.15281	27.383	8.64127
ENSG00000103160	HSDL1	0.454046	1.36988	0.0310597	0.200075	30.0526	9.33293	41.1684	14.1021
ENSG00000125354	SEPTIN6	0.453699	1.36955	0.101868	0.349776	42.8447	23.3627	58.6779	26.3667
ENSG00000281789		0.453271	1.36914	0.368866	0.637032	0.231513	0.218064	0.316973	0.182483
ENSG00000162341	TPCN2	0.453252	1.36912	0.0275339	0.190223	16.8255	5.68505	23.0362	8.05948
ENSG00000149781	FERMT3	0.452472	1.36838	0.169715	0.439679	33.6359	20.455	46.0267	22.9463
ENSG00000185596	WASH3P	0.452422	1.36834	0.118995	0.373559	5.07941	2.68044	6.95034	3.05207
ENSG00000249115	HAUS5	0.452293	1.36821	0.0983977	0.345625	25.0113	14.5543	34.2207	16.0565
ENSG00000101216	GMEB2	0.45148	1.36744	0.0343961	0.210279	23.9484	8.14888	32.748	11.398
ENSG00000089248	ERP29	0.451357	1.36733	0.0985404	0.345625	210.613	76.4074	287.976	188.132
ENSG00000183751	TBL3	0.451077	1.36706	0.0518975	0.254032	43.0682	17.9608	58.8769	23.7294
ENSG00000118046	STK11	0.450966	1.36695	0.0644381	0.28005	42.075	16.3685	57.5147	21.2449
ENSG00000072832	CRMP1	0.450815	1.36681	0.42722	0.685497	21.4623	29.7909	29.3349	45.3855
ENSG00000112659	CUL9	0.450741	1.36674	0.0581115	0.266621	33.8258	16.277	46.2312	9.9812
ENSG00000085733	CTTN	0.450595	1.3666	0.0605195	0.272936	309.536	115.123	423.012	154.351
ENSG00000151849	CENPJ	0.450544	1.36656	0.163684	0.43184	13.1868	10.3637	18.0205	9.23919
ENSG00000160813	PPP1R35	0.450246	1.36627	0.258583	0.538865	23.2317	17.4012	31.7409	20.3343
ENSG00000038382	TRIO	0.450079	1.36611	0.199239	0.473198	160.023	81.8544	218.609	159.475
ENSG00000155849	ELMO1	0.450074	1.36611	0.175769	0.447	22.5297	18.4887	30.778	11.1007
ENSG00000162191	UBXN1	0.450071	1.36611	0.0387481	0.2212	74.604	27.6454	101.917	34.4848
ENSG00000171443	ZNF524	0.449953	1.366	0.140938	0.402903	13.3632	6.04796	18.254	10.9312
ENSG00000130699	TAF4	0.449362	1.36544	0.0526183	0.25592	25.4348	9.55164	34.7297	12.8477
ENSG00000248487	ABHD14A	0.449148	1.36523	0.203666	0.478503	12.7413	5.08795	17.3948	19.275
ENSG00000243554	AC004967.1	0.449146	1.36523	0.11461	0.366905	4.0029	1.97099	5.46489	2.33881
ENSG00000105655	ISYNA1	0.449086	1.36517	0.231917	0.510402	51.6361	28.1343	70.4923	55.2399
ENSG00000112941	TENT4A	0.448737	1.36484	0.0728443	0.29793	37.3188	14.0885	50.9344	23.7542
ENSG00000110717	NDUFS8	0.448568	1.36468	0.158497	0.426439	91.4805	60.1341	124.842	73.9314
ENSG00000174529	TMEM81	0.448219	1.36436	0.0921448	0.335166	2.52553	1.37708	3.44572	1.07659
ENSG00000228393	LINC01004	0.448218	1.36435	0.335138	0.608221	2.58479	3.02879	3.52657	2.0904
ENSG00000215039	CD27-AS1	0.447855	1.36401	0.0921186	0.335166	18.2914	8.87309	24.9497	10.6643
ENSG00000198198	SZT2	0.447688	1.36385	0.0919992	0.334961	49.1855	24.4378	67.0818	15.8143
ENSG00000153094	BCL2L11	0.447683	1.36385	0.0441801	0.234499	37.4487	11.4521	51.0743	20.0335
ENSG00000167747	C19orf48	0.447641	1.36381	0.111388	0.361764	44.4447	21.9835	60.6141	27.9683
ENSG00000125731	SH2D3A	0.447602	1.36377	0.178395	0.450099	28.0059	19.4366	38.1936	16.3881
ENSG00000124143	ARHGAP40	0.447292	1.36348	0.489144	0.73014	11.4044	13.1415	15.5497	9.75651
ENSG00000066279	ASPM	0.446959	1.36316	0.293652	0.569779	22.3338	15.4134	30.4446	24.2883
ENSG00000105204	DYRK1B	0.446803	1.36302	0.0572576	0.265002	21.5209	7.45805	29.3334	11.7223
ENSG00000185291	IL3RA	0.446259	1.3625	0.183014	0.456066	10.8477	6.25954	14.78	8.86537
ENSG00000117215	PLA2G2D	0.446187	1.36243	0.543474	0.766606	12.2269	20.002	16.6584	16.5416
ENSG00000063660	GPC1	0.44604	1.3623	0.268262	0.548492	52.8049	42.5803	71.9359	42.6231
ENSG00000264112	AC015813.1	0.445735	1.36201	0.200909	0.475224	12.6439	8.94554	17.2211	8.11291
ENSG00000272333	KMT2B	0.445603	1.36188	0.0480398	0.243807	74.9666	33.0182	102.096	31.0667
ENSG00000134453	RBM17	0.445424	1.36171	0.00763402	0.115981	68.3371	16.2367	93.0557	24.3359
ENSG00000132819	RBM38	0.445311	1.36161	0.181237	0.453678	45.522	27.5311	61.9831	46.0631
ENSG00000141994	DUS3L	0.445141	1.36145	0.0461179	0.239648	16.12	6.13516	21.9465	7.05666
ENSG00000160999	SH2B2	0.445082	1.36139	0.195319	0.468102	6.75938	3.583	9.20216	5.88654
ENSG00000196562	SULF2	0.445042	1.36135	0.202594	0.477079	39.3104	30.3117	53.5153	29.751
ENSG00000101017	CD40	0.444659	1.36099	0.232808	0.510529	33.3667	17.8398	45.4118	39.7466
ENSG00000156873	PHKG2	0.444583	1.36092	0.144782	0.407563	41.4936	31.6522	56.4695	26.6553
ENSG00000101158	NELFCD	0.444374	1.36072	0.0166736	0.154813	81.8825	19.9449	111.419	35.133
ENSG00000119777	TMEM214	0.444114	1.36048	0.0945879	0.33849	134.222	61.1305	182.607	90.8548
ENSG00000171853	TRAPPC12	0.443954	1.36033	0.015897	0.153053	42.2664	13.361	57.4962	14.4978
ENSG00000277978	AC010542.6	0.443147	1.35957	0.262287	0.542856	1.19687	1.03358	1.62722	0.597166
ENSG00000263528	IKBKE	0.442666	1.35911	0.108849	0.358924	20.254	7.57853	27.5275	13.2276
ENSG00000134809	TIMM10	0.441849	1.35834	0.111902	0.362422	21.7032	11.8321	29.4804	14.7282
ENSG00000090097	PCBP4	0.441626	1.35813	0.117025	0.370156	26.3205	13.2657	35.7468	19.9412
ENSG00000170515	PA2G4	0.4416	1.35811	0.0442621	0.23472	114.053	33.8887	154.897	61.9203
ENSG00000185215	TNFAIP2	0.441242	1.35777	0.179627	0.451687	92.3803	44.7579	125.431	72.3015
ENSG00000110934	BIN2	0.441129	1.35767	0.214218	0.490164	12.5485	9.12202	17.0367	9.18697
ENSG00000170035	UBE2E3	0.441055	1.3576	0.0762395	0.304245	49.607	23.5042	67.3463	31.7127
ENSG00000008130	NADK	0.440833	1.35739	0.0443279	0.234725	83.9003	29.3772	113.885	45.5437
ENSG00000099991	CABIN1	0.439497	1.35613	0.0775136	0.306492	83.7064	40.005	113.517	41.0362
ENSG00000089127	OAS1	0.439106	1.35576	0.191254	0.464417	55.3895	34.4546	75.0951	48.4528
ENSG00000059588	TARBP1	0.438994	1.35566	0.0761271	0.30416	51.3516	26.8378	69.6152	21.8438
ENSG00000184164	CRELD2	0.438961	1.35563	0.0952767	0.340086	52.8895	36.9963	71.6985	21.5887
ENSG00000146555	SDK1	0.438774	1.35545	0.427842	0.685961	39.6507	41.0474	53.7446	49.393
ENSG00000107731	UNC5B	0.438754	1.35543	0.159787	0.427954	31.3372	20.7647	42.4755	23.3045
ENSG00000228409	CCT6P1	0.43861	1.3553	0.0370871	0.217478	5.81251	1.92405	7.87768	1.7875
ENSG00000168496	FEN1	0.43829	1.355	0.150877	0.415474	33.3907	20.9984	45.2443	24.0389
ENSG00000205744	DENND1C	0.438163	1.35488	0.103484	0.351797	26.4841	13.0229	35.8827	12.9407
ENSG00000197136	PCNX3	0.437903	1.35463	0.070576	0.293815	88.0962	41.6822	119.338	36.5138
ENSG00000130589	HELZ2	0.437879	1.35461	0.118309	0.372597	64.156	30.9402	86.9064	40.1211
ENSG00000013441	CLK1	0.437406	1.35417	0.0787729	0.308726	71.1825	36.9104	96.3929	24.2663
ENSG00000063244	U2AF2	0.437383	1.35415	0.0366482	0.216871	150.002	40.8983	203.124	84.3832
ENSG00000105705	SUGP1	0.43733	1.3541	0.0412144	0.228337	22.5635	7.31856	30.5531	9.883
ENSG00000256537	SMIM10L1	0.436991	1.35378	0.132721	0.391703	24.0053	6.05901	32.4979	21.0484
ENSG00000124228	DDX27	0.43657	1.35338	0.0163736	0.15411	70.6844	22.5229	95.6631	17.568
ENSG00000187498	COL4A1	0.436562	1.35338	0.0993206	0.345671	307.851	155.194	416.638	167.072
ENSG00000099804	CDC34	0.436301	1.35313	0.121556	0.377166	47.9453	19.9868	64.8763	35.3687
ENSG00000246067	RAB30-DT	0.435582	1.35246	0.146515	0.409541	8.34684	4.72044	11.2887	5.41388
ENSG00000185236	RAB11B	0.43535	1.35224	0.0701564	0.293326	97.2708	44.8031	131.533	47.4137
ENSG00000146433	TMEM181	0.435122	1.35202	0.0592326	0.269534	52.9111	16.4863	71.5371	35.1557
ENSG00000184363	PKP3	0.434841	1.35176	0.25379	0.533779	74.8147	56.7554	101.132	53.4812
ENSG00000178718	RPP25	0.434675	1.35161	0.183546	0.456318	18.644	10.689	25.1994	16.2288
ENSG00000105339	DENND3	0.434634	1.35157	0.0849746	0.320807	36.344	15.0554	49.1214	20.3621
ENSG00000160214	RRP1	0.43441	1.35136	0.0547955	0.260392	29.7001	9.53685	40.1354	14.9233
ENSG00000247774	PCED1B-AS1	0.434338	1.35129	0.34252	0.61491	9.15802	11.124	12.3751	8.5322
ENSG00000162337	LRP5	0.434034	1.35101	0.24987	0.528431	163.775	112.622	221.261	110.326
ENSG00000088876	ZNF343	0.433808	1.35079	0.104038	0.352103	8.51688	4.80947	11.5046	3.60173
ENSG00000176834	VSIG10	0.43375	1.35074	0.18726	0.459254	21.0546	12.7406	28.4393	12.6379
ENSG00000162073	PAQR4	0.433518	1.35052	0.185056	0.457294	17.969	11.3474	24.2675	13.8281
ENSG00000087266	SH3BP2	0.433073	1.35011	0.0336184	0.208592	52.2317	14.7498	70.5183	26.25
ENSG00000175063	UBE2C	0.43258	1.34965	0.369184	0.637393	45.721	41.3784	61.7071	33.9802
ENSG00000255062	AP001318.2	0.43232	1.3494	0.202487	0.47699	1.25127	0.576055	1.68846	1.04258
ENSG00000268713	AC005261.3	0.432267	1.34935	0.0740641	0.300072	4.00395	1.10865	5.40274	2.12696
ENSG00000126934	MAP2K2	0.431954	1.34906	0.0398646	0.224952	88.0333	23.1829	118.762	45.3073
ENSG00000198931	APRT	0.431864	1.34898	0.121267	0.377117	89.6451	36.7292	120.929	64.9332
ENSG00000139182	CLSTN3	0.431693	1.34882	0.062923	0.277351	88.611	35.965	119.52	47.0416
ENSG00000180353	HCLS1	0.431642	1.34877	0.17505	0.445861	62.506	31.4681	84.306	41.8316
ENSG00000100445	SDR39U1	0.431618	1.34875	0.0852549	0.321258	7.75816	3.48303	10.4638	3.46093
ENSG00000169087	HSPBAP1	0.431495	1.34863	0.0717866	0.29588	10.1723	4.4224	13.7186	4.80776
ENSG00000280120	AC073857.1	0.43146	1.3486	0.141495	0.403693	2.38002	1.3559	3.20969	1.31857
ENSG00000159069	FBXW5	0.431302	1.34845	0.0698291	0.292378	107.148	36.422	144.483	72.0128
ENSG00000268006	PTOV1-AS1	0.430921	1.34809	0.0437815	0.234131	12.9063	3.85712	17.3989	5.70174
ENSG00000211904	IGHJ2	0.430778	1.34796	0.593313	0.79757	1.55822	2.08103	2.10042	2.87053
ENSG00000134028	ADAMDEC1	0.43077	1.34795	0.52545	0.755744	17.3385	26.8934	23.3715	28.7384
ENSG00000154277	UCHL1	0.430731	1.34792	0.663708	0.842758	109.072	205.934	147.019	208.468
ENSG00000184677	ZBTB40	0.430677	1.34787	0.132214	0.390982	33.8468	18.7763	45.621	18.2664
ENSG00000280730		0.43055	1.34775	0.429134	0.686633	0.382984	0.328978	0.516166	0.40358
ENSG00000232838	PET117	0.429908	1.34715	0.0470364	0.241456	4.77427	1.56936	6.43165	1.60423
ENSG00000095380	NANS	0.429858	1.3471	0.170521	0.440185	53.3414	19.0043	71.8563	63.711
ENSG00000160050	CCDC28B	0.429704	1.34696	0.151425	0.416	5.66221	2.19132	7.62676	4.5685
ENSG00000217801	AL390719.1	0.42956	1.34682	0.408776	0.671088	8.25904	10.3208	11.1235	8.68875
ENSG00000014164	ZC3H3	0.429186	1.34647	0.0687564	0.290146	31.9899	14.069	43.0735	15.5554
ENSG00000166833	NAV2	0.429094	1.34639	0.306516	0.582316	118.645	63.3018	159.742	178.941
ENSG00000171169	NAIF1	0.429063	1.34636	0.0442575	0.23472	9.98995	2.70774	13.4501	5.89009
ENSG00000010292	NCAPD2	0.428907	1.34621	0.140467	0.402124	86.2148	37.3216	116.064	86.9984
ENSG00000156970	BUB1B	0.428733	1.34605	0.306375	0.582245	17.0648	12.475	22.9701	17.4694
ENSG00000102181	CD99L2	0.428688	1.34601	0.111878	0.362422	80.5476	31.3119	108.418	52.8621
ENSG00000176915	ANKLE2	0.428625	1.34595	0.0176197	0.157844	83.4423	17.7884	112.309	39.5793
ENSG00000104518	GSDMD	0.428333	1.34568	0.138575	0.399578	77.4908	46.0059	104.278	40.4923
ENSG00000128274	A4GALT	0.428309	1.34566	0.241187	0.520668	15.2102	10.2529	20.4676	11.6164
ENSG00000198169	ZNF251	0.428196	1.34555	0.0452322	0.237057	17.7683	7.10176	23.9081	6.78075
ENSG00000157778	PSMG3	0.427834	1.34521	0.333312	0.60659	53.2301	45.2483	71.6059	70.337
ENSG00000090971	NAT14	0.427745	1.34513	0.20857	0.483434	20.5684	13.4912	27.6671	17.5436
ENSG00000168765	GSTM4	0.427664	1.34505	0.101868	0.349776	14.6222	5.98352	19.6676	9.11791
ENSG00000178209	PLEC	0.427571	1.34497	0.148419	0.412238	416.013	186.651	559.524	260.235
ENSG00000075218	GTSE1	0.427518	1.34492	0.316686	0.593403	12.5048	11.8709	16.8179	8.2924
ENSG00000086504	MRPL28	0.427164	1.34459	0.142883	0.405154	49.5966	23.7055	66.687	42.0607
ENSG00000159788	RGS12	0.427097	1.34453	0.0971039	0.343449	29.001	13.1464	38.9925	15.7038
ENSG00000179041	RRS1	0.426842	1.34429	0.0752484	0.302762	22.5325	8.5489	30.2902	12.3535
ENSG00000033327	GAB2	0.426775	1.34423	0.197592	0.470728	42.9174	22.4997	57.6906	36.4745
ENSG00000273344	PAXIP1-AS1	0.426367	1.34385	0.143097	0.405467	12.1486	6.93275	16.3259	7.65906
ENSG00000265666	RARA-AS1	0.426289	1.34377	0.0982067	0.345389	3.98755	1.32005	5.35837	2.10442
ENSG00000139514	SLC7A1	0.425879	1.34339	0.16463	0.432838	47.8027	22.5969	64.2177	38.6048
ENSG00000176532	PRR15	0.425743	1.34326	0.62331	0.817962	10.8405	21.0381	14.5616	17.2328
ENSG00000141873	SLC39A3	0.425143	1.34271	0.0565662	0.263072	16.3537	6.32733	21.9582	7.25565
ENSG00000278768	BACE1-AS	0.425085	1.34265	0.172812	0.443069	3.60024	1.77536	4.83386	2.31406
ENSG00000180921	FAM83H	0.424772	1.34236	0.190065	0.462721	111.993	60.8307	150.334	86.6358
ENSG00000276070	CCL4L2	0.424756	1.34235	0.432463	0.689383	6.59271	8.24004	8.84969	7.92593
ENSG00000169228	RAB24	0.424746	1.34234	0.192873	0.466064	8.63824	6.94483	11.5954	3.41692
ENSG00000221184	AL513534.2	0.424718	1.34231	0.323947	0.597488	0.30861	0.212012	0.414251	0.235924
ENSG00000267751	AC009005.1	0.423533	1.34121	0.428522	0.686295	3.29537	3.88169	4.41978	4.03951
ENSG00000188157	AGRN	0.42342	1.3411	0.294901	0.570777	369.556	184.07	495.612	414.668
ENSG00000110074	FOXRED1	0.423386	1.34107	0.0409519	0.228077	26.1495	8.66017	35.0683	11.0717
ENSG00000188042	ARL4C	0.423102	1.34081	0.15529	0.421592	80.9318	41.9184	108.514	47.5993
ENSG00000172889	EGFL7	0.422309	1.34007	0.359139	0.628531	52.4143	54.2183	70.2389	70.8582
ENSG00000111912	NCOA7	0.42199	1.33977	0.354948	0.625053	135.483	90.9053	181.517	177.555
ENSG00000186111	PIP5K1C	0.421914	1.3397	0.0133396	0.141754	44.6429	11.6791	59.8083	11.9703
ENSG00000171456	ASXL1	0.421481	1.3393	0.0330854	0.206717	77.7193	24.2554	104.09	29.0386
ENSG00000154803	FLCN	0.421291	1.33912	0.105811	0.355446	24.8701	10.8453	33.3042	11.3877
ENSG00000172638	EFEMP2	0.42118	1.33902	0.221424	0.498622	40.9871	35.2963	54.8826	26.8231
ENSG00000156298	TSPAN7	0.421111	1.33896	0.500005	0.7373	16.7883	19.2751	22.4789	23.4052
ENSG00000106105	GARS1	0.421067	1.33892	0.14117	0.403245	145.977	62.7407	195.452	121.214
ENSG00000090447	TFAP4	0.420689	1.33857	0.120025	0.374734	15.5475	4.88192	20.8113	12.5584
[truncated: 9,641 more rows]

## Sheet: IPA_DE_BAA
Ingenuity Canonical Pathways	-log(p-value)	Ratio	z-score	Molecules
Superpathway of D-myo-inositol (1,4,5)-trisphosphate Metabolism	5.11	0.304	-1.89	BPNT1,BPNT2,IMPA1,INPP5F,INPPL1,MINPP1,PTEN
Autophagy	3.95	0.09	-1.147	ARL8B,ATG4B,BMP6,CREB1,DAPK3,DDIT3,DRAM1,HIF1A,MAPK9,NFKB2,PIK3R1,PPP2R3A,PPP2R5A,PPP2R5B,PRKAR1A,PTEN,SLC3A2,SLC7A5,VPS33B
NAD Signaling Pathway	3.89	0.103	0.775	BMP6,CLOCK,DXO,HIF1A,IDH2,NFKB2,NUDT12,PARP12,PARP6,PARP8,PIK3R1,SIRT6,SLC7A5,TIPARP,TRPM2
Mitochondrial Dysfunction	3.78	0.097	#NUM!	ACO1,APH1A,ATP5F1D,CAT,FURIN,MAPK9,MT-CO1,MT-CO2,MT-CYB,MT-ND4L,NDUFA4L2,NDUFV1,RHOT2,SDHC,UQCRFS1,VPS9D1
D-myo-inositol (1,4,5)-trisphosphate Degradation	3.71	0.294	-1.342	BPNT1,BPNT2,IMPA1,INPP5F,INPPL1
Sirtuin Signaling Pathway	3.52	0.0775	0.5	ATG16L2,ATG4B,ATP5F1D,BPGM,CLOCK,DOT1L,DUSP6,GLS,HIF1A,IDH2,MT-CYB,MT-ND4L,NDUFA4L2,NDUFV1,NFKB2,PGAM1,PGK1,SDHC,SIRT6,SLC25A5,SLC2A1,UQCRFS1
Myo-inositol Biosynthesis	3.43	0.6	#NUM!	BPNT2,IMPA1,INPP5F
Rapoport-Luebering Glycolytic Shunt	3.43	0.6	#NUM!	BPGM,MINPP1,PGAM1
D-myo-inositol (1,4,5,6)-Tetrakisphosphate Biosynthesis	3.09	0.0872	-1.155	DOT1L,DUSP6,DUSP8,INPP5F,INPPL1,MINPP1,NUDT12,PPP1R12C,PPP1R1B,PPP1R3C,PPP2R3A,PPP2R5A,PPP2R5B,PTEN,PTPN13
D-myo-inositol (3,4,5,6)-tetrakisphosphate Biosynthesis	3.09	0.0872	-1.155	DOT1L,DUSP6,DUSP8,INPP5F,INPPL1,MINPP1,NUDT12,PPP1R12C,PPP1R1B,PPP1R3C,PPP2R3A,PPP2R5A,PPP2R5B,PTEN,PTPN13
3-phosphoinositide Biosynthesis	2.91	0.0808	-1.387	DOT1L,DUSP6,DUSP8,INPP5F,INPPL1,MINPP1,NUDT12,PIK3R1,PPP1R12C,PPP1R1B,PPP1R3C,PPP2R3A,PPP2R5A,PPP2R5B,PTEN,PTPN13
Gluconeogenesis I	2.87	0.2	-0.447	BPGM,ENO3,ME3,PGAM1,PGK1
3-phosphoinositide Degradation	2.8	0.0815	-0.832	DOT1L,DUSP6,DUSP8,INPP5F,INPPL1,MINPP1,NUDT12,PPP1R12C,PPP1R1B,PPP1R3C,PPP2R3A,PPP2R5A,PPP2R5B,PTEN,PTPN13
B Cell Receptor Signaling	2.78	0.0658	-1.265	CAMK2D,CDC42,CREB1,IGHA2,IGHG4,IGHV1-45,IGHV2-26,IGHV3-11,IGHV3-13,IGHV3-66,IGKV2-28,IGKV2D-29,IGKV2D-40,IGKV5-2,IGLV3-25,IGLV5-45,IGLV6-57,INPP5F,INPPL1,MAPK9,NFKB2,PAG1,PIK3R1,PTEN
D-myo-inositol-5-phosphate Metabolism	2.71	0.0798	-1.155	DOT1L,DUSP6,DUSP8,INPP5F,INPPL1,MINPP1,NUDT12,PPP1R12C,PPP1R1B,PPP1R3C,PPP2R3A,PPP2R5A,PPP2R5B,PTEN,PTPN13
Coronavirus Pathogenesis Pathway	2.58	0.0773	0	DDIT3,E2F5,FURIN,HDAC6,HIF1A,IRF7,IRF9,MAPK9,NFKB2,RN7SL2,RPS10,RPS14,RPS3A,STAT2,TYK2
D-myo-inositol (1,3,4)-trisphosphate Biosynthesis	2.56	0.222	-1	INPP5F,INPPL1,MINPP1,PTEN
Superpathway of Inositol Phosphate Compounds	2.31	0.0705	-1.069	DOT1L,DUSP6,DUSP8,INPP5F,INPPL1,MINPP1,NUDT12,PIK3R1,PPP1R12C,PPP1R1B,PPP1R3C,PPP2R3A,PPP2R5A,PPP2R5B,PTEN,PTPN13
Production of Nitric Oxide and Reactive Oxygen Species in Macrophages	2.29	0.0745	0.277	APOD,CAT,CDC42,MAPK9,NFKB2,PCYOX1,PIK3R1,PPP1R3C,PPP2R3A,PPP2R5A,PPP2R5B,RHOT2,TLR2,TYK2
BEX2 Signaling Pathway	2.24	0.1	-0.378	CTNNB1,HIF1A,MAPK9,NFKB2,PPP2R3A,PPP2R5A,PPP2R5B,PTEN
Systemic Lupus Erythematosus In B Cell Signaling Pathway	2.2	0.0578	1.155	CTNNB1,IGHA2,IGHG4,IGHV1-45,IGHV2-26,IGHV3-11,IGHV3-13,IGHV3-66,IGKV2-28,IGKV2D-29,IGKV2D-40,IGKV5-2,IGLV3-25,IGLV5-45,IGLV6-57,INPP5F,INPPL1,IRF7,IRF9,ISG20,NFKB2,PAG1,PIK3R1,STAT2,TNFSF15,TYK2
Tight Junction Signaling	2.12	0.0734	#NUM!	CDC42,CLDN12,CPSF1,CTNNB1,NFKB2,OCLN,PPP2R3A,PPP2R5A,PPP2R5B,PRKAR1A,PTEN,STX16,STX1A
Notch Signaling	2.1	0.135	0	APH1A,DLL1,DTX4,FURIN,LFNG
Glycolysis I	2.09	0.167	-1	BPGM,ENO3,PGAM1,PGK1
IL-15 Signaling	2.03	0.0642	#NUM!	IGHA2,IGHG4,IGHV1-45,IGHV2-26,IGHV3-11,IGHV3-13,IGHV3-66,IGKV2-28,IGKV2D-29,IGKV2D-40,IGKV5-2,IGLV3-25,IGLV5-45,IGLV6-57,NFKB2,PIK3R1,TYK2
Oxidative Phosphorylation	2.02	0.0857	1.667	ATP5F1D,MT-CO1,MT-CO2,MT-CYB,MT-ND4L,NDUFV1,SDHC,UQCRFS1,VPS9D1
Death Receptor Signaling	1.83	0.0851	0	CRADD,NFKB2,PARP12,PARP6,PARP8,TIPARP,TNFRSF25,TNFSF15
Apelin Pancreas Signaling Pathway	1.75	0.111	-0.447	DDIT3,MAPK9,NFKB2,PIK3R1,PRKAR1A
Molecular Mechanisms of Cancer	1.58	0.0526	#NUM!	APH1A,ARHGEF1,ARHGEF3,BMP3,BMP6,CAMK2D,CDC42,CDK10,CTNNB1,E2F5,GNAQ,GNG11,GNG12,HDAC6,HIF1A,MAPK9,NFKB2,PIK3R1,PRKAR1A,RHOT2,STK36,TYK2,ZBTB17
Reelin Signaling in Neurons	1.57	0.072	-1.667	ARHGEF1,ARHGEF3,CAMK2D,CDC42,MAPK8IP3,MAPK9,PDK2,PIK3R1,WASL
ILK Signaling	1.49	0.0622	-0.577	CDC42,CREB1,CTNNB1,HIF1A,MAPK9,NFKB2,PIK3R1,PPP2R3A,PPP2R5A,PPP2R5B,PTEN,RHOT2
Ceramide Signaling	1.47	0.0778	0.816	KSR1,NFKB2,PIK3R1,PPP2R3A,PPP2R5A,PPP2R5B,SMPD2
Adenine and Adenosine Salvage VI	1.47	1	#NUM!	ADK
Cell Cycle Regulation by BTG Family Proteins	1.44	0.108	#NUM!	E2F5,PPP2R3A,PPP2R5A,PPP2R5B
Dopamine-DARPP32 Feedback in cAMP Signaling	1.4	0.0621	-0.905	CREB1,CSNK1A1,CSNK1G2,GNAQ,ITPR1,PPP1R1B,PPP1R3C,PPP2R3A,PPP2R5A,PPP2R5B,PRKAR1A
IL-1 Signaling	1.39	0.0745	-1	GNAQ,GNG11,GNG12,IL1RAP,MAPK9,NFKB2,PRKAR1A
Role of CHK Proteins in Cell Cycle Checkpoint Control	1.36	0.0877	0.447	E2F5,PPP2R3A,PPP2R5A,PPP2R5B,RAD9A
Dopamine Receptor Signaling	1.35	0.0789	#NUM!	PPP1R1B,PPP1R3C,PPP2R3A,PPP2R5A,PPP2R5B,PRKAR1A
ATM Signaling	1.35	0.0729	1.134	CREB1,MAPK9,PPP2R3A,PPP2R5A,PPP2R5B,RAD9A,ZNF420
mTOR Signaling	1.33	0.0588	0.378	CDC42,DGKZ,EIF3E,HIF1A,PIK3R1,PPP2R3A,PPP2R5A,PPP2R5B,RHOT2,RPS10,RPS14,RPS3A
UVA-Induced MAPK Signaling	1.33	0.0722	#NUM!	MAPK9,PARP12,PARP6,PARP8,PIK3R1,SMPD2,TIPARP
Thrombin Signaling	1.32	0.0585	-1	ARHGEF1,ARHGEF3,CAMK2D,CDC42,CREB1,GNAQ,GNG11,GNG12,ITPR1,NFKB2,PIK3R1,RHOT2
p53 Signaling	1.31	0.0714	1.342	CTNNB1,DRAM1,HIF1A,PIDD1,PIK3R1,PTEN,RRM2B

## Sheet: DE_Q1_vs_Q3_W
Entity_ID	Gene_name	logFC_mn	LinearFC_mn	PValue	FDR	q3_mn	q3_sd	q1_mn	q1_sd
ENSG00000160182	TFF1	4.08603	16.9831	1.89984e-10	8.03069e-08	6.2139	32.3764	105.532	346.694
ENSG00000124102	PI3	2.76078	6.77764	3.38771e-12	4.83299e-09	1.6056	4.08354	10.8822	31.5197
ENSG00000108602	ALDH3A1	2.39905	5.27456	3.39916e-07	2.13696e-05	21.2107	63.6728	111.877	409.65
ENSG00000115523	GNLY	2.31554	4.97792	1.05834e-10	5.46879e-08	13.1211	18.4259	65.3158	362.871
ENSG00000128422	KRT17	2.2806	4.8588	1.80624e-08	2.31147e-06	53.7373	215.551	261.099	584.547
ENSG00000171560	FGA	2.0331	4.09285	0.000104688	0.00156184	73.2167	233.562	299.665	894.493
ENSG00000170373	CST1	1.92851	3.80663	5.12728e-06	0.000168639	10.2117	18.33	38.8722	149.296
ENSG00000163993	S100P	1.88196	3.68574	2.75139e-06	0.000104324	91.183	163.512	336.077	664.343
ENSG00000134827	TCN1	1.88142	3.68438	0.00018642	0.00242324	11.3103	46.8326	41.6714	100.795
ENSG00000163735	CXCL5	1.77658	3.42613	4.65416e-07	2.6296e-05	7.87173	17.0341	26.9696	66.3953
ENSG00000259337	IGHV1OR15-2	1.73846	3.33679	1.10448e-06	5.06242e-05	1.52163	2.26048	5.07735	20.544
ENSG00000124466	LYPD3	1.7174	3.28843	8.83228e-09	1.32635e-06	7.82561	12.8078	25.734	46.2754
ENSG00000136059	VILL	1.71721	3.28801	1.17117e-11	1.33666e-08	11.5777	14.834	38.0674	72.9062
ENSG00000104140	RHOV	1.70296	3.25568	1.33769e-09	3.31894e-07	12.6192	18.2472	41.0841	94.9905
ENSG00000066405	CLDN18	1.67419	3.19139	0.000159744	0.00217561	40.6383	77.9122	129.693	381.057
ENSG00000125775	SDCBP2	1.67336	3.18956	1.16391e-10	5.53486e-08	11.1152	15.1056	35.4526	49.6337
ENSG00000172927	MYEOV	1.64237	3.12178	1.81716e-05	0.000427614	11.144	20.5729	34.789	70.2744
ENSG00000127324	TSPAN8	1.6414	3.11969	3.39448e-06	0.000121446	47.6281	82.0983	148.585	379.441
ENSG00000275385	CCL18	1.62271	3.07953	9.99256e-11	5.43072e-08	63.0518	51.2581	194.17	431.814
ENSG00000185633	NDUFA4L2	1.59724	3.02563	4.7945e-10	1.51999e-07	18.5753	28.173	56.2021	121.162
ENSG00000160180	TFF3	1.58307	2.99607	0.000126093	0.00180791	77.572	172.685	232.411	618.177
ENSG00000162493	PDPN	1.56644	2.96174	2.49265e-09	5.08011e-07	24.2398	22.2094	71.792	387.22
ENSG00000135919	SERPINE2	1.54185	2.91168	5.29901e-08	5.44844e-06	28.8591	40.0776	84.0285	449.195
ENSG00000136244	IL6	1.51644	2.86083	8.38998e-10	2.31868e-07	4.536	6.38728	12.9767	19.9401
ENSG00000124920	MYRF	1.51414	2.85629	1.42644e-08	1.98401e-06	24.8217	34.7499	70.8981	154.144
ENSG00000166532	RIMKLB	1.46073	2.75247	1.72663e-10	7.88242e-08	28.4749	27.977	78.3763	169.536
ENSG00000205420	KRT6A	1.43735	2.70824	0.00631318	0.0329006	41.5212	210.607	112.449	359.258
ENSG00000211655	IGLV1-36	1.43488	2.70359	8.14085e-05	0.00129403	6.45116	10.7736	17.4413	92.5952
ENSG00000151012	SLC7A11	1.41821	2.67253	3.59833e-07	2.18445e-05	23.9491	32.7235	64.0046	90.002
ENSG00000138207	RBP4	1.41373	2.66424	9.62472e-06	0.000267267	4.46168	7.75739	11.887	34.4164
ENSG00000196611	MMP1	1.41171	2.66053	2.60166e-05	0.000567739	49.3446	80.4746	131.283	294.652
ENSG00000188910	GJB3	1.40983	2.65706	2.30607e-05	0.000517075	6.22256	14.3165	16.5337	21.404
ENSG00000104760	FGL1	1.35746	2.56235	0.00780571	0.0383944	34.3359	121.601	87.9805	338.758
ENSG00000163734	CXCL3	1.34864	2.54671	8.58508e-09	1.31904e-06	4.32763	6.11167	11.0212	15.0662
ENSG00000161714	PLCD3	1.3443	2.53907	1.94475e-14	7.39846e-11	10.4814	8.32659	26.6131	28.7093
ENSG00000237988	OR2I1P	1.32815	2.5108	6.41912e-06	0.000194767	5.22044	6.48739	13.1075	42.8182
ENSG00000099953	MMP11	1.30406	2.46923	2.03521e-05	0.000468304	65.9717	90.8566	162.899	535.543
ENSG00000131016	AKAP12	1.30201	2.46572	3.89057e-07	2.31782e-05	31.9297	57.0952	78.7298	178.474
ENSG00000128342	LIF	1.28092	2.42994	8.66803e-09	1.31904e-06	26.3688	32.661	64.0748	72.1083
ENSG00000012223	LTF	1.2706	2.41262	0.000167926	0.00226274	79.3404	153.882	191.418	334.738
ENSG00000176532	PRR15	1.26726	2.40704	2.4731e-05	0.00055128	4.92482	6.96373	11.8542	16.1112
ENSG00000006016	CRLF1	1.24321	2.36725	0.00170982	0.0125332	79.5424	167.479	188.297	408.894
ENSG00000105894	PTN	1.23642	2.35613	7.8791e-05	0.00126654	9.55149	17.697	22.5045	83.2175
ENSG00000140564	FURIN	1.2347	2.35332	2.43299e-10	9.57508e-08	227.976	161.831	536.5	1037.33
ENSG00000103089	FA2H	1.22322	2.33466	9.56676e-08	7.91199e-06	16.9403	23.8131	39.55	59.573
ENSG00000125740	FOSB	1.22253	2.33355	0.000205114	0.00259531	60.1965	129.113	140.472	367.928
ENSG00000138623	SEMA7A	1.20843	2.31087	6.30284e-10	1.79836e-07	14.289	13.1006	33.02	61.8808
ENSG00000176153	GPX2	1.1755	2.25872	0.0141732	0.0589287	65.7244	175.317	148.453	275.315
ENSG00000118849	RARRES1	1.1752	2.25824	4.92116e-08	5.10593e-06	21.2108	20.0788	47.899	93.4453
ENSG00000278771	RN7SL3	1.1686	2.24793	0.0131507	0.0556915	3.78592	18.4952	8.51051	60.2271
ENSG00000173432	SAA1	1.16405	2.24086	0.000782297	0.00714269	9.89245	23.5538	22.1676	50.0764
ENSG00000162878	PKDCC	1.16152	2.23693	3.4617e-08	3.87338e-06	10.6517	20.8888	23.827	36.0168
ENSG00000113739	STC2	1.13806	2.20085	4.52184e-07	2.58039e-05	12.9524	16.7386	28.5063	35.9776
ENSG00000115758	ODC1	1.13375	2.19429	1.60562e-05	0.000389065	205.021	301.263	449.876	991.042
ENSG00000135094	SDS	1.12864	2.18653	8.74491e-08	7.50419e-06	7.28238	6.21562	15.9231	29.2618
ENSG00000102854	MSLN	1.11398	2.16442	0.00734934	0.0368371	319.764	545.79	692.103	1176.25
ENSG00000226958		1.11284	2.16272	0.000447193	0.00462331	1.43095	2.48485	3.09475	15.7731
ENSG00000226278	PSPHP1	1.1101	2.15861	0.0403552	0.122493	2.65893	4.98242	5.73959	17.5422
ENSG00000173702	MUC13	1.10534	2.1515	0.0233562	0.0835362	40.2194	117.881	86.532	176.19
ENSG00000162482	AKR7A3	1.09161	2.13112	0.00343414	0.0210658	7.30652	15.3625	15.5711	37.2891
ENSG00000104267	CA2	1.09116	2.13046	0.000137546	0.00193804	21.3397	45.623	45.4632	210.58
ENSG00000122254	HS3ST2	1.08116	2.11574	3.23481e-05	0.000663994	6.46775	8.05227	13.6841	29.1533
ENSG00000262406	MMP12	1.0792	2.11287	0.000244353	0.00295737	22.7645	35.7108	48.0984	70.1656
ENSG00000211892	IGHG4	1.07113	2.10108	0.000832287	0.00743263	262.478	685.041	551.488	1337.07
ENSG00000150630	VEGFC	1.06664	2.09454	1.82277e-08	2.31147e-06	5.80787	5.52853	12.1648	18.2583
ENSG00000130600	H19	1.0605	2.08566	0.0258451	0.0898751	69.0387	357.134	143.991	493.498
ENSG00000167617	CDC42EP5	1.05134	2.07245	2.17992e-06	8.76036e-05	5.92194	8.80872	12.2729	23.9801
ENSG00000224041	IGKV3D-15	1.04622	2.06512	0.00111685	0.00924953	2.784	3.77472	5.7493	22.5311
ENSG00000135549	PKIB	1.01921	2.02681	1.77224e-05	0.000421386	9.66678	12.2559	19.5927	33.2469
ENSG00000211660	IGLV2-23	1.01554	2.02165	0.000397656	0.00424948	90.3325	101.325	182.621	514.752
ENSG00000080573	COL5A3	1.01511	2.02105	1.27745e-07	9.9148e-06	15.0317	13.7167	30.3798	31.9304
ENSG00000136689	IL1RN	1.01409	2.01963	1.44285e-08	1.98401e-06	13.2117	9.69054	26.6828	28.5402
ENSG00000058085	LAMC2	1.00398	2.00553	2.56393e-05	0.000564905	201.728	267.84	404.571	618.532
ENSG00000012171	SEMA3B	1.00211	2.00292	2.9649e-05	0.000623379	31.1891	36.3961	62.4692	77.2437
ENSG00000182240	BACE2	0.990252	1.98653	4.14087e-07	2.40776e-05	71.6004	63.0979	142.236	169.437
ENSG00000123342	MMP19	0.986063	1.98077	6.2876e-08	6.13336e-06	13.6138	10.4838	26.9659	39.0237
ENSG00000198535	C2CD4A	0.985131	1.97949	0.000359502	0.00391881	11.4092	18.9972	22.5845	35.5942
ENSG00000166920	C15orf48	0.983439	1.97717	0.000234809	0.00287232	45.1063	57.3949	89.183	170.55
ENSG00000131746	TNS4	0.982562	1.97597	0.00723139	0.0364701	22.6184	82.2971	44.6933	83.7567
ENSG00000267519	AC020916.1	0.979714	1.97207	5.72935e-07	3.06991e-05	13.9581	12.2416	27.5264	32.976
ENSG00000178038	ALS2CL	0.972973	1.96288	2.49666e-07	1.69609e-05	32.1426	24.7184	63.0921	53.1846
ENSG00000074410	CA12	0.971081	1.96031	0.0044296	0.0255071	44.1045	96.291	86.4585	181.157
ENSG00000211976	IGHV3-73	0.970099	1.95898	0.00688457	0.0350775	22.8687	56.8822	44.7992	111.851
ENSG00000253368	TRNP1	0.968871	1.95731	3.4302e-05	0.000694128	17.886	19.7297	35.0083	50.9939
ENSG00000100342	APOL1	0.964492	1.95138	6.12223e-08	6.07592e-06	141.752	94.6623	276.611	333.284
ENSG00000113924	HGD	0.963452	1.94997	0.00844686	0.0403871	17.2771	36.1984	33.6899	61.8131
ENSG00000099812	MISP	0.961373	1.94716	3.02749e-07	1.98579e-05	53.4015	49.763	103.981	93.5233
ENSG00000091409	ITGA6	0.956011	1.93994	3.62729e-07	2.19039e-05	59.5932	56.7739	115.607	150.647
ENSG00000151632	AKR1C2	0.952906	1.93577	0.0711941	0.182102	217.068	682.512	420.192	933.198
ENSG00000167680	SEMA6B	0.950483	1.93252	3.82874e-09	7.28291e-07	8.67387	6.75205	16.7624	17.2203
ENSG00000218175	AC016739.1	0.946756	1.92753	7.78675e-06	0.000223854	3.0537	2.4305	5.88611	13.0328
ENSG00000268903	AL627309.6	0.942827	1.92229	1.0113e-05	0.000280144	2.18776	2.23966	4.20552	3.90462
ENSG00000100918	REC8	0.937885	1.91572	6.13009e-06	0.000189966	12.9154	17.4163	24.7422	36.0984
ENSG00000095539	SEMA4G	0.937065	1.91463	3.35409e-06	0.000121151	12.1999	10.805	23.3582	27.905
ENSG00000136826	KLF4	0.933327	1.90967	2.64509e-07	1.7863e-05	21.4653	20.8391	40.9918	38.0912
ENSG00000019186	CYP24A1	0.929124	1.90412	0.0158522	0.0636152	68.9556	252.858	131.3	309.752
ENSG00000167874	TMEM88	0.925989	1.89999	9.16551e-09	1.35852e-06	1.62469	0.823503	3.08688	4.61341
ENSG00000166250	CLMP	0.92517	1.89891	1.09164e-05	0.000294833	15.3985	14.1424	29.2404	54.8366
ENSG00000125968	ID1	0.921516	1.8941	7.38467e-06	0.000216106	44.5298	54.9409	84.3442	82.4812
ENSG00000105538	RASIP1	0.919111	1.89095	2.29311e-09	4.75841e-07	8.34306	6.57461	15.7763	16.3055
ENSG00000018280	SLC11A1	0.918025	1.88953	5.62524e-07	3.02834e-05	26.7423	22.3951	50.5303	58.5953
ENSG00000065618	COL17A1	0.917552	1.88891	0.0099128	0.0452539	52.2237	69.0331	98.6457	218.392
ENSG00000259342	AC025580.1	0.9149	1.88544	0.00343326	0.0210658	3.30423	6.07755	6.22992	11.7749
ENSG00000142910	TINAGL1	0.912588	1.88242	2.49561e-07	1.69609e-05	36.1027	48.7567	67.9605	64.4376
ENSG00000140297	GCNT3	0.912206	1.88192	0.00226883	0.0155989	33.6083	46.2167	63.2482	98.8453
ENSG00000250742	LINC02381	0.896122	1.86106	9.97099e-05	0.00150769	4.79014	5.8487	8.91472	13.6797
ENSG00000119782	FKBP1B	0.89374	1.85799	1.48733e-06	6.35766e-05	3.19561	4.63357	5.9374	6.95988
ENSG00000167757	KLK11	0.891994	1.85574	0.0267853	0.0919515	29.2341	54.8724	54.2508	112.299
ENSG00000177685	CRACR2B	0.88763	1.85013	2.72213e-07	1.81682e-05	26.96	22.1008	49.8797	48.8062
ENSG00000181617	FDCSP	0.887144	1.84951	0.0184754	0.0703101	4.09719	6.28556	7.5778	34.6986
ENSG00000117472	TSPAN1	0.8864	1.84856	0.000501525	0.00507544	85.4439	129.562	157.948	182.862
ENSG00000188536	HBA2	0.885488	1.84739	0.00137062	0.0106744	5.76181	7.49882	10.6443	22.5218
ENSG00000108352	RAPGEFL1	0.875841	1.83508	4.70797e-08	4.92954e-06	10.6926	6.77522	19.6218	20.0464
ENSG00000088992	TESC	0.873975	1.83271	0.00607208	0.0319505	57.1293	115.362	104.701	157.106
ENSG00000211951	IGHV2-26	0.87298	1.83144	0.00499284	0.0278647	9.19844	14.5355	16.8464	35.6258
ENSG00000106366	SERPINE1	0.865456	1.82191	6.23477e-05	0.00105192	80.7143	77.0794	147.055	236.343
ENSG00000132470	ITGB4	0.862633	1.81835	5.981e-05	0.00102035	178.312	170.323	324.233	330.17
ENSG00000269981	AL627309.7	0.860596	1.81579	4.3067e-05	0.000820921	1.20269	1.29269	2.18383	1.97543
ENSG00000184113	CLDN5	0.856132	1.81018	6.5059e-07	3.35981e-05	17.3257	13.3801	31.3626	31.1608
ENSG00000135047	CTSL	0.850203	1.80275	2.23739e-09	4.75841e-07	124.906	65.5676	225.174	250.216
ENSG00000272669	AL021707.6	0.848743	1.80093	9.92601e-07	4.70373e-05	1.01391	0.756808	1.82598	1.41096
ENSG00000105810	CDK6	0.848306	1.80039	3.24807e-05	0.000663994	25.9298	29.4285	46.6836	109.813
ENSG00000105696	TMEM59L	0.846671	1.79835	0.0172514	0.0672209	14.3529	26.9416	25.8114	45.2421
ENSG00000149260	CAPN5	0.84474	1.79594	4.30852e-05	0.000820921	43.9007	63.9726	78.8431	87.8658
ENSG00000240671	IGKV1-8	0.844657	1.79584	0.00433735	0.025068	5.59432	9.0789	10.0465	33.0105
ENSG00000089356	FXYD3	0.843568	1.79448	0.000496715	0.00504809	87.034	121.801	156.181	171.497
ENSG00000272821	U62317.2	0.84091	1.79118	3.06338e-08	3.56759e-06	5.27636	3.90642	9.45091	6.9579
ENSG00000198873	GRK5	0.840522	1.7907	4.58168e-09	8.22366e-07	16.6493	9.01564	29.8139	26.0239
ENSG00000181458	TMEM45A	0.834898	1.78373	0.000268792	0.00318229	22.4673	40.4027	40.0755	61.3181
ENSG00000107159	CA9	0.827754	1.77492	0.0381123	0.117307	19.6657	44.0491	34.9051	69.541
ENSG00000276566	IGKV1D-13	0.822581	1.76857	0.0208735	0.0768978	1.61186	3.73418	2.85068	7.71964
ENSG00000140678	ITGAX	0.821702	1.76749	1.16366e-06	5.22867e-05	37.0976	22.0929	65.5697	79.9001
ENSG00000154277	UCHL1	0.820052	1.76547	0.0212608	0.0780224	52.7386	114.374	93.1084	162.324
ENSG00000131037	EPS8L1	0.818164	1.76316	2.45382e-07	1.68708e-05	30.0535	20.6613	52.9892	44.1243
ENSG00000112559	MDFI	0.816953	1.76168	1.57904e-05	0.000386253	19.5737	28.8016	34.4827	30.2457
ENSG00000170955	CAVIN3	0.816837	1.76154	4.70313e-08	4.92954e-06	13.0858	9.83277	23.0511	16.7352
ENSG00000169429	CXCL8	0.816527	1.76116	0.00135363	0.0106251	41.0012	60.6591	72.2098	126.555
ENSG00000113070	HBEGF	0.81532	1.75969	3.38732e-06	0.000121446	21.2463	15.5589	37.3869	59.8913
ENSG00000029153	ARNTL2	0.813661	1.75767	0.000342253	0.00378501	25.6216	48.179	45.0341	50.1096
ENSG00000131459	GFPT2	0.813254	1.75717	3.89924e-07	2.31782e-05	12.0142	9.46716	21.1111	20.5863
ENSG00000099337	KCNK6	0.810967	1.75439	5.40846e-10	1.66829e-07	22.1852	14.2544	38.9214	23.146
ENSG00000168734	PKIG	0.81076	1.75413	1.36709e-07	1.02114e-05	30.4276	19.2481	53.3742	96.5281
ENSG00000128656	CHN1	0.809353	1.75242	8.53279e-10	2.31868e-07	12.5145	7.19357	21.9307	16.4317
ENSG00000170608	FOXA3	0.805932	1.74827	0.00503465	0.0280159	7.08477	8.8806	12.3861	20.0627
ENSG00000120875	DUSP4	0.805313	1.74753	0.00235401	0.0160396	74.8282	148.507	130.764	154.585
ENSG00000225698	IGHV3-72	0.800732	1.74198	0.00309311	0.0195469	5.6357	6.74316	9.81731	24.0889
ENSG00000101955	SRPX	0.798073	1.73878	7.11849e-05	0.0011755	7.28662	7.54134	12.6698	35.2785
ENSG00000178860	MSC	0.79734	1.73789	1.70463e-06	7.15256e-05	5.65555	3.85358	9.82875	13.8791
ENSG00000073060	SCARB1	0.796176	1.73649	2.11886e-08	2.57261e-06	33.9737	27.937	58.9951	50.6334
ENSG00000280411	IGHV1-69D	0.787815	1.72646	0.00575053	0.0308071	26.7069	51.5905	46.1084	82.3931
ENSG00000235162	C12orf75	0.786884	1.72534	0.000911749	0.00796768	15.7358	29.3329	27.1496	50.382
ENSG00000158825	CDA	0.78677	1.72521	0.0083274	0.040034	11.4779	17.8155	19.8017	27.6545
ENSG00000196139	AKR1C3	0.785945	1.72422	0.0292229	0.0974784	134.418	334.987	231.766	560.875
ENSG00000196188	CTSE	0.785341	1.7235	0.0248988	0.0874368	258.415	412.134	445.378	799.618
ENSG00000204305	AGER	0.784346	1.72231	0.0164656	0.0653011	65.4679	159.218	112.756	243.661
ENSG00000142748	FCN3	0.780956	1.71827	0.00223691	0.0154445	8.15726	11.96	14.0164	20.3822
ENSG00000175538	KCNE3	0.77979	1.71688	1.11097e-06	5.0718e-05	14.904	12.1462	25.5885	24.5889
ENSG00000130203	APOE	0.778804	1.71571	4.99931e-05	0.000907109	242.002	187.845	415.205	554.521
ENSG00000105963	ADAP1	0.778242	1.71504	1.29441e-07	9.9148e-06	10.9111	6.45304	18.713	15.1511
ENSG00000001617	SEMA3F	0.775424	1.71169	4.78372e-07	2.66325e-05	30.34	24.3723	51.9327	64.7567
ENSG00000161638	ITGA5	0.774426	1.71051	2.71534e-07	1.81682e-05	79.0528	71.1452	135.221	120.472
ENSG00000213088	ACKR1	0.774143	1.71017	0.00187992	0.0135025	10.0969	10.2403	17.2675	24.5351
ENSG00000100097	LGALS1	0.77327	1.70914	4.60501e-05	0.000858774	205.321	193.219	350.922	672.3
ENSG00000133466	C1QTNF6	0.772991	1.70881	1.08043e-07	8.68377e-06	24.0289	16.8572	41.0608	29.4444
ENSG00000137857	DUOX1	0.770105	1.70539	0.00223333	0.0154301	32.8728	39.5687	56.061	84.5607
ENSG00000176454	LPCAT4	0.768477	1.70347	2.74918e-10	9.80511e-08	27.2642	11.3448	46.4438	44.4645
ENSG00000142273	CBLC	0.768161	1.7031	1.10269e-06	5.06242e-05	15.7403	9.15939	26.8073	22.1018
ENSG00000019169	MARCO	0.767417	1.70222	0.00299969	0.0191153	48.0236	55.1382	81.7467	121.236
ENSG00000108821	COL1A1	0.766601	1.70126	0.00035275	0.00386737	2452.73	2450.11	4172.73	4672.91
ENSG00000198744	MTCO3P12	0.766489	1.70112	0.0616933	0.164246	8.78775	45.617	14.9491	119.487
ENSG00000159231	CBR3	0.765923	1.70046	0.00385157	0.0228709	8.44083	17.5736	14.3533	43.1769
ENSG00000088826	SMOX	0.76348	1.69758	1.35973e-05	0.000343332	11.2777	14.5423	19.1448	22.1547
ENSG00000130702	LAMA5	0.760093	1.6936	2.85879e-06	0.000107681	165.886	133.956	280.945	265.67
ENSG00000089472	HEPH	0.75917	1.69252	6.54938e-07	3.36703e-05	14.5314	10.2314	24.5947	22.5345
ENSG00000149021	SCGB1A1	0.755395	1.68809	0.12086	0.263492	113.742	236.066	192.007	446.884
ENSG00000117983	MUC5B	0.752141	1.68429	0.0940274	0.220628	569.778	1862.24	959.671	1787.57
ENSG00000125999	BPIFB1	0.749789	1.68155	0.0705329	0.180978	119.111	358.335	200.29	403.055
ENSG00000157227	MMP14	0.74837	1.67989	6.6201e-07	3.38813e-05	247.974	181.018	416.569	379.158
ENSG00000170801	HTRA3	0.742928	1.67357	0.000116131	0.00170142	54.1202	51.9137	90.5739	100.156
ENSG00000103569	AQP9	0.742534	1.67311	0.000119928	0.00173919	9.59533	8.91071	16.0541	18.2541
ENSG00000121316	PLBD1	0.742377	1.67293	1.09274e-05	0.000294833	33.3438	28.392	55.7818	53.3935
ENSG00000163739	CXCL1	0.740944	1.67127	0.00431811	0.0249912	20.1252	36.4672	33.6346	52.5893
ENSG00000137673	MMP7	0.739276	1.66934	0.0145002	0.0597872	84.7498	149.67	141.476	309.102
ENSG00000187513	GJA4	0.739178	1.66922	8.10488e-08	7.17062e-06	7.08792	4.0872	11.8313	8.64598
ENSG00000233461	AL445524.1	0.737514	1.6673	0.000550556	0.00546866	5.74329	8.72367	9.57579	16.5483
ENSG00000137077	CCL21	0.734535	1.66386	0.000139805	0.0019626	31.6019	31.0523	52.5812	49.3363
ENSG00000100311	PDGFB	0.733405	1.66256	1.36892e-07	1.02114e-05	18.4347	12.6282	30.6487	20.349
ENSG00000108448	TRIM16L	0.732047	1.66099	0.00562669	0.0303747	13.1186	23.3188	21.7899	37.1978
ENSG00000106089	STX1A	0.730016	1.65866	6.88668e-05	0.00114741	14.7839	15.1206	24.5214	23.5786
ENSG00000106541	AGR2	0.729802	1.65841	0.00283894	0.0183431	441.451	469.869	732.108	888.228
ENSG00000166741	NNMT	0.727882	1.65621	0.000235421	0.00287306	135.556	132.947	224.509	279.076
ENSG00000203883	SOX18	0.727701	1.656	5.53763e-07	2.99531e-05	5.28956	3.3885	8.75951	6.81942
ENSG00000075618	FSCN1	0.726491	1.65461	0.000393969	0.0042257	93.2782	137.519	154.339	156.67
ENSG00000106333	PCOLCE	0.725905	1.65394	3.35439e-06	0.000121151	61.5922	48.6917	101.87	101.161
ENSG00000158125	XDH	0.72547	1.65344	0.00409174	0.0239728	17.5171	21.512	28.9635	52.7217
ENSG00000123610	TNFAIP6	0.725263	1.6532	4.03407e-05	0.000798381	4.40409	3.48261	7.28085	6.57052
ENSG00000117525	F3	0.724903	1.65279	0.000313189	0.00355977	107.511	136.254	177.694	168.92
ENSG00000226332	AL354836.1	0.723632	1.65133	5.73553e-05	0.000990312	2.11996	2.18472	3.50076	2.94968
ENSG00000066056	TIE1	0.722899	1.6505	3.53934e-07	2.17175e-05	21.2652	11.9987	35.0981	37.2175
ENSG00000142185	TRPM2	0.722601	1.65015	6.6088e-06	0.00019849	14.4181	11.1485	23.7922	21.0946
ENSG00000183098	GPC6	0.722178	1.64967	0.00139527	0.0107596	15.7434	19.6877	25.9714	28.871
ENSG00000123358	NR4A1	0.721645	1.64906	0.00154739	0.0116879	96.5304	140.138	159.185	278.302
ENSG00000198959	TGM2	0.72114	1.64848	1.34712e-06	5.89067e-05	375.961	259.758	619.766	512.184
ENSG00000159228	CBR1	0.719795	1.64695	0.00958363	0.0442314	156.044	365.84	256.996	724.757
ENSG00000176170	SPHK1	0.719639	1.64677	5.6654e-05	0.000982662	12.0436	13.9274	19.8331	14.9758
ENSG00000140511	HAPLN3	0.716931	1.64368	3.85415e-06	0.000134108	16.0311	12.3276	26.35	22.8248
ENSG00000155380	SLC16A1	0.715708	1.64229	0.00205232	0.0144587	19.9302	31.7686	32.7311	66.9274
ENSG00000026297	RNASET2	0.715043	1.64153	4.77366e-07	2.66325e-05	54.4096	22.0617	89.315	133.26
ENSG00000104635	SLC39A14	0.710547	1.63642	1.70403e-07	1.22315e-05	43.8027	27.0374	71.6798	67.8149
ENSG00000179862	CITED4	0.708962	1.63463	7.53132e-05	0.00122443	4.79048	4.02467	7.83064	8.3048
ENSG00000173621	LRFN4	0.70824	1.63381	1.94287e-05	0.000448865	13.9282	12.8977	22.7561	16.0156
ENSG00000144476	ACKR3	0.707948	1.63348	0.000894917	0.00785668	20.1115	45.2084	32.8517	50.022
ENSG00000161091	MFSD12	0.707861	1.63338	4.14998e-08	4.51083e-06	45.4667	25.2228	74.2645	79.4532
ENSG00000168542	COL3A1	0.707015	1.63242	0.000312409	0.00355615	1759.45	1790.5	2872.16	2906.43
ENSG00000138678	GPAT3	0.704244	1.62929	0.00074718	0.00689375	8.53338	8.71765	13.9034	29.4946
ENSG00000175592	FOSL1	0.704041	1.62906	0.00766747	0.037899	9.67255	18.477	15.7572	21.1503
ENSG00000198759	EGFL6	0.703991	1.62901	2.34411e-06	9.28934e-05	12.9132	8.25739	21.0357	17.3161
ENSG00000138080	EMILIN1	0.702845	1.62771	3.04321e-06	0.000112111	71.5777	53.7613	116.508	83.7213
ENSG00000198517	MAFK	0.702496	1.62732	4.12531e-05	0.000810535	47.702	41.6888	77.6263	96.3042
ENSG00000100985	MMP9	0.702133	1.62691	0.00153451	0.0116137	63.4089	67.0066	103.161	168.928
ENSG00000183963	SMTN	0.701295	1.62596	2.82919e-11	2.69079e-08	38.3116	18.1086	62.2933	27.1433
ENSG00000204301	NOTCH4	0.700532	1.6251	7.90781e-08	7.05092e-06	20.1888	11.3532	32.8088	24.3259
ENSG00000111206	FOXM1	0.698517	1.62284	0.0003144	0.00355977	28.2772	26.0916	45.8892	45.6537
ENSG00000188549	CCDC9B	0.698054	1.62231	9.7239e-05	0.00147382	14.9529	12.6149	24.2583	19.7247
ENSG00000000938	FGR	0.697704	1.62192	8.82441e-06	0.000249563	17.9932	9.9433	29.1835	32.6521
ENSG00000121552	CSTA	0.697236	1.6214	0.00110241	0.00917526	6.80192	11.0883	11.0286	27.6729
ENSG00000105755	ETHE1	0.695329	1.61925	6.82351e-09	1.14525e-06	19.1653	11.1019	31.0335	22.2864
ENSG00000093009	CDC45	0.691266	1.6147	0.000152359	0.00209756	8.85896	8.17796	14.3046	13.1078
ENSG00000059804	SLC2A3	0.689093	1.61227	0.000123403	0.00177828	53.1354	73.2307	85.6686	89.4574
ENSG00000100292	HMOX1	0.688835	1.61198	2.45515e-06	9.69573e-05	53.7065	30.2639	86.5739	96.2665
ENSG00000184381	PLA2G6	0.684839	1.60752	6.91454e-05	0.0011488	13.7245	10.4096	22.0624	23.199
ENSG00000137648	TMPRSS4	0.684591	1.60725	0.00508775	0.0282013	99.3611	90.2367	159.698	185.023
ENSG00000172183	ISG20	0.684575	1.60723	1.05486e-06	4.91392e-05	30.4924	18.0747	49.0083	44.9766
ENSG00000114378	HYAL1	0.683269	1.60577	0.00347974	0.0213059	14.9061	16.8669	23.9359	29.756
ENSG00000112769	LAMA4	0.682844	1.6053	1.87115e-06	7.6818e-05	55.7803	35.978	89.5442	78.1876
ENSG00000265714		0.681971	1.60433	0.0188162	0.0712977	0.241032	0.457228	0.386695	0.576382
ENSG00000197905	TEAD4	0.681897	1.60425	8.95689e-10	2.37733e-07	9.85764	4.85324	15.8141	8.5692
ENSG00000142156	COL6A1	0.681659	1.60398	1.72014e-05	0.000413303	254.11	187.899	407.588	353.736
ENSG00000108700	CCL8	0.680756	1.60298	0.00822683	0.0397346	4.06622	5.92892	6.51806	10.6945
ENSG00000025708	TYMP	0.680323	1.6025	7.47976e-08	6.82188e-06	126.178	76.9482	202.201	104.975
ENSG00000177989	ODF3B	0.680231	1.6024	2.91965e-06	0.000109252	21.8469	15.6083	35.0073	22.4537
ENSG00000149798	CDC42EP2	0.679986	1.60212	1.52293e-07	1.10708e-05	10.4663	7.57387	16.7683	11.716
ENSG00000095383	TBC1D2	0.679063	1.6011	2.47645e-06	9.71262e-05	41.6841	32.8689	66.7404	53.0131
ENSG00000204632	HLA-G	0.677423	1.59928	0.0215597	0.0787747	12.0165	25.0745	19.2178	97.4014
ENSG00000179913	B3GNT3	0.677106	1.59893	0.000428623	0.00447155	33.8666	28.1245	54.1503	45.6385
ENSG00000101311	FERMT1	0.677097	1.59892	0.000162978	0.00221173	24.3331	22.6265	38.9067	35.3653
ENSG00000088827	SIGLEC1	0.676704	1.59848	0.000523408	0.00523546	28.5574	23.2166	45.6486	54.7191
ENSG00000124785	NRN1	0.676294	1.59803	0.00160815	0.0120221	6.63327	8.25436	10.6002	26.0279
ENSG00000064655	EYA2	0.675244	1.59687	0.0396468	0.120954	14.259	32.6736	22.7698	46.3573
ENSG00000135074	ADAM19	0.675177	1.59679	1.14608e-05	0.000300952	25.3183	19.6708	40.4281	32.968
ENSG00000010295	IFFO1	0.672024	1.59331	1.35493e-06	5.89111e-05	9.79678	6.09932	15.6093	11.8011
ENSG00000163815	CLEC3B	0.672021	1.5933	0.00179313	0.0130433	7.37394	6.9926	11.7489	15.5617
ENSG00000128965	CHAC1	0.671817	1.59308	1.52761e-05	0.000377373	4.33041	3.23703	6.89868	5.69961
ENSG00000236017	ASMTL-AS1	0.671349	1.59256	0.00348456	0.021324	3.59549	4.24777	5.72604	5.72521
ENSG00000171564	FGB	0.670748	1.5919	0.271026	0.449399	112.784	543.067	179.54	622.091
ENSG00000204262	COL5A2	0.670109	1.59119	0.00041222	0.0043683	171.799	164.415	273.365	297.343
ENSG00000105173	CCNE1	0.669054	1.59003	0.00178456	0.0130059	8.09791	10.2757	12.8759	23.1195
ENSG00000084636	COL16A1	0.668443	1.58936	3.80727e-06	0.00013329	42.8443	28.0247	68.0948	45.3645
ENSG00000121361	KCNJ8	0.666563	1.58729	0.000354301	0.00387322	11.5447	14.8085	18.3248	28.1113
ENSG00000165474	GJB2	0.665017	1.58559	0.0111999	0.0495444	26.5886	43.526	42.1585	55.5515
ENSG00000162545	CAMK2N1	0.661785	1.58204	0.00138437	0.0107263	31.2814	37.5593	49.4884	54.8185
ENSG00000163017	ACTG2	0.661344	1.58156	0.0011239	0.00926811	14.4547	13.0077	22.861	33.0618
ENSG00000101194	SLC17A9	0.661293	1.5815	0.00519653	0.0286789	25.517	53.0511	40.3551	66.1004
ENSG00000011422	PLAUR	0.660419	1.58054	4.41819e-05	0.000834848	75.4653	68.2188	119.276	98.953
ENSG00000099985	OSM	0.658691	1.57865	0.0014993	0.0114001	5.24664	5.84964	8.28261	9.63102
ENSG00000128274	A4GALT	0.658357	1.57828	9.42932e-05	0.00145036	16.279	15.4501	25.6929	21.9101
ENSG00000124237	C20orf85	0.657822	1.5777	0.128513	0.274516	5.63788	11.2161	8.89487	20.2349
ENSG00000281420	AP001052.1	0.65769	1.57755	0.000302891	0.00348126	0.204824	0.168611	0.323121	0.250624
ENSG00000225697	SLC26A6	0.657312	1.57714	5.96587e-07	3.13975e-05	18.003	11.1937	28.3932	19.8585
ENSG00000211653	IGLV1-40	0.65675	1.57653	0.00817608	0.0395397	88.3049	94.1138	139.215	208.34
ENSG00000143179	UCK2	0.656714	1.57649	8.98394e-05	0.00139692	21.3829	22.3836	33.7099	21.5197
ENSG00000087116	ADAMTS2	0.656705	1.57648	0.000102964	0.00154086	31.2037	23.1939	49.192	48.208
ENSG00000109814	UGDH	0.656553	1.57631	0.00129299	0.0102613	139.365	142.94	219.683	402.255
ENSG00000006025	OSBPL7	0.655492	1.57515	1.07352e-06	4.96035e-05	18.0687	10.4413	28.4609	18.7549
ENSG00000146070	PLA2G7	0.652969	1.5724	0.000117534	0.00171484	14.0339	9.0078	22.0669	25.8672
ENSG00000017483	SLC38A5	0.652422	1.5718	0.000178417	0.00235167	14.4864	16.0808	22.7699	24.6672
ENSG00000198435	NRARP	0.652356	1.57173	6.43294e-06	0.000194767	3.79953	3.07065	5.97184	4.20996
ENSG00000157570	TSPAN18	0.651387	1.57068	3.59277e-06	0.000128138	13.2133	8.35157	20.7539	15.3353
ENSG00000171557	FGG	0.649638	1.56877	0.162116	0.320831	266.737	807.855	418.45	807.887
ENSG00000134817	APLNR	0.649174	1.56827	0.000119812	0.00173919	11.4566	8.20898	17.967	17.9168
ENSG00000145287	PLAC8	0.648699	1.56775	0.0104362	0.0471063	16.52	24.2307	25.8993	47.7351
ENSG00000163874	ZC3H12A	0.648404	1.56743	3.98455e-06	0.000137805	23.2215	21.3149	36.3981	22.7616
ENSG00000161940	BCL6B	0.645055	1.5638	7.77245e-07	3.87367e-05	10.6901	6.76374	16.7172	12.0783
ENSG00000145113	MUC4	0.644627	1.56333	0.0244024	0.0860379	112.5	167.302	175.876	227.201
ENSG00000137573	SULF1	0.644588	1.56329	0.0027567	0.0179374	144.135	180.017	225.325	248.766
ENSG00000257671	KRT7-AS	0.644392	1.56308	0.00158872	0.0119341	8.10429	7.30519	12.6677	11.6923
ENSG00000211935	IGHV1-3	0.643483	1.5621	0.0558607	0.153291	2.41736	4.31766	3.77615	6.80996
ENSG00000140254	DUOXA1	0.64278	1.56134	0.0106901	0.0478457	12.0454	13.5072	18.8069	29.8809
ENSG00000184557	SOCS3	0.642657	1.5612	4.22031e-06	0.000144589	127.257	97.4941	198.673	137.618
ENSG00000183779	ZNF703	0.641643	1.56011	0.000811893	0.00731647	21.7537	24.9414	33.938	40.2566
ENSG00000131941	RHPN2	0.64134	1.55978	5.30722e-05	0.000943728	30.7797	21.0173	48.0095	47.3761
ENSG00000111199	TRPV4	0.641124	1.55954	0.00039432	0.0042257	8.08178	7.49154	12.6039	14.1454
ENSG00000164692	COL1A2	0.639218	1.55748	0.000834395	0.007434	1607.98	1586.34	2504.4	2820.38
ENSG00000211644	IGLV1-51	0.638424	1.55663	0.0137517	0.0576828	62.8481	73.2938	97.8311	135.01
ENSG00000177575	CD163	0.636864	1.55495	0.00107671	0.00903565	84.3142	80.8672	131.104	170.571
ENSG00000160883	HK3	0.636618	1.55468	0.000696828	0.00650278	13.57	10.3247	21.0971	22.7663
ENSG00000174807	CD248	0.635607	1.55359	3.7573e-05	0.000752814	28.7531	24.7711	44.6706	38.642
ENSG00000176788	BASP1	0.634156	1.55203	0.00352955	0.0214492	71.1126	74.2737	110.369	180.233
ENSG00000231475	IGHV4-31	0.632025	1.54974	0.028273	0.0951858	15.2627	19.8513	23.6532	59.7121
ENSG00000168487	BMP1	0.631644	1.54933	4.72783e-07	2.65806e-05	36.1606	24.3934	56.0246	33.9262
ENSG00000088002	SULT2B1	0.631328	1.54899	0.00366927	0.0220872	9.90909	9.07293	15.3491	20.8235
ENSG00000151388	ADAMTS12	0.631064	1.54871	0.000768613	0.00704592	23.4404	22.0248	36.3023	43.0201
ENSG00000272141	AL390719.2	0.6299	1.54746	0.00447825	0.0257612	2.68111	2.89631	4.14891	4.54932
ENSG00000136542	GALNT5	0.628766	1.54624	0.00212758	0.0148787	29.4933	26.4881	45.6038	67.8654
ENSG00000227300	KRT16P2	0.627767	1.54517	0.0780294	0.193828	17.7303	27.5097	27.3964	49.1795
ENSG00000133106	EPSTI1	0.625956	1.54323	6.65102e-05	0.00110977	24.5064	19.2005	37.8191	28.6388
ENSG00000272034	SNORD14A	0.625525	1.54277	4.85848e-05	0.00088994	0.416557	0.260477	0.642653	0.47378
ENSG00000187134	AKR1C1	0.62512	1.54234	0.177674	0.34029	217.142	679.183	334.907	903.712
ENSG00000183765	CHEK2	0.624787	1.54198	2.66346e-06	0.000102007	13.0776	7.51278	20.1655	17.1877
ENSG00000104415	CCN4	0.6241	1.54125	0.00023703	0.00288711	10.3108	8.26196	15.8916	14.1209
ENSG00000107742	SPOCK2	0.623274	1.54037	0.000118132	0.00171751	57.1661	45.0714	88.0568	82.4903
ENSG00000053747	LAMA3	0.622889	1.53996	0.0241171	0.0852873	89.6386	258.657	138.04	229.755
ENSG00000196562	SULF2	0.620691	1.53761	0.000419615	0.00441796	47.7527	75.9639	73.4251	69.0372
ENSG00000072274	TFRC	0.620564	1.53748	1.5805e-05	0.000386253	121.192	76.5074	186.329	177.51
ENSG00000101213	PTK6	0.620546	1.53746	0.00160849	0.0120221	24.6483	26.9	37.8957	35.5931
ENSG00000010327	STAB1	0.6205	1.53741	4.92463e-05	0.000897031	62.9581	52.575	96.7922	66.5308
ENSG00000177464	GPR4	0.619941	1.53681	2.70181e-06	0.00010313	5.84406	3.50786	8.98122	5.73696
ENSG00000184232	OAF	0.619187	1.53601	2.63782e-06	0.000101365	15.3855	9.21256	23.6322	19.8103
ENSG00000004468	CD38	0.618028	1.53478	0.00127186	0.0101435	18.801	16.244	28.8553	29.8659
ENSG00000090776	EFNB1	0.617161	1.53385	5.09954e-05	0.00091511	28.3477	19.8245	43.4813	41.5861
ENSG00000157483	MYO1E	0.615495	1.53208	3.29942e-07	2.1037e-05	57.2143	28.9929	87.6571	62.4584
ENSG00000129521	EGLN3	0.615386	1.53197	0.0111833	0.0495092	47.8041	64.69	73.2343	92.3909
ENSG00000127528	KLF2	0.614931	1.53148	0.000207317	0.00261737	19.9169	14.5928	30.5024	33.7513
ENSG00000091136	LAMB1	0.614175	1.53068	1.6638e-05	0.000401459	132.56	107.583	202.907	145.574
ENSG00000174804	FZD4	0.613837	1.53032	1.32119e-05	0.00033583	25.1223	15.4683	38.4453	47.4377
ENSG00000251322	SHANK3	0.613823	1.53031	4.64478e-07	2.6296e-05	20.3899	10.9664	31.2029	20.756
ENSG00000266714	MYO15B	0.613204	1.52965	0.00190281	0.0136155	38.4006	43.6255	58.7395	61.2676
ENSG00000166923	GREM1	0.612737	1.52916	0.033017	0.106387	51.3898	105.973	78.5831	109.61
ENSG00000196839	ADA	0.612464	1.52887	1.41332e-05	0.000353732	7.63147	6.05411	11.6675	7.70017
ENSG00000171766	GATM	0.61196	1.52833	0.00497841	0.0278371	17.1478	20.2676	26.2076	35.4091
ENSG00000213886	UBD	0.611959	1.52833	0.0215624	0.0787747	11.8563	14.8724	18.1203	31.6234
ENSG00000173918	C1QTNF1	0.611405	1.52775	9.5474e-05	0.00146458	19.0501	15.6323	29.1038	22.4699
ENSG00000256940	PPP1R14B-AS1	0.610028	1.52629	0.00179807	0.0130709	1.30021	1.81655	1.98449	1.6179
ENSG00000200087	SNORA73B	0.609992	1.52625	0.246377	0.423161	17.0716	91.1603	26.0555	169.371
ENSG00000100139	MICALL1	0.60955	1.52578	5.72292e-10	1.71883e-07	28.9138	12.1912	44.1161	24.6098
ENSG00000221926	TRIM16	0.609253	1.52547	0.000408932	0.00434153	17.0096	17.7985	25.9476	29.5144
ENSG00000169255	B3GALNT1	0.608254	1.52441	0.000347543	0.00382498	12.519	11.0467	19.0842	17.8525
ENSG00000239819	IGKV1D-8	0.607157	1.52325	0.030148	0.099531	2.5284	3.33354	3.85139	11.1545
ENSG00000100290	BIK	0.606999	1.52309	0.00194764	0.0138668	6.21577	6.61227	9.46716	10.728
ENSG00000135480	KRT7	0.603855	1.51977	0.000291652	0.00337932	570.17	419.076	866.528	692.629
ENSG00000069011	PITX1	0.602311	1.51815	0.0399372	0.121534	13.2499	27.6205	20.1153	23.6241
ENSG00000183018	SPNS2	0.601195	1.51697	0.00483417	0.027286	26.073	36.419	39.552	47.4134
ENSG00000196923	PDLIM7	0.600796	1.51655	1.01911e-06	4.78646e-05	50.5107	30.7728	76.6021	50.0407
ENSG00000111261	MANSC1	0.599395	1.51508	1.232e-05	0.00031958	29.3586	17.0689	44.4806	43.3389
ENSG00000137507	LRRC32	0.599261	1.51494	6.39688e-06	0.000194767	28.9098	18.4159	43.7967	32.002
ENSG00000197766	CFD	0.599157	1.51483	0.00232992	0.0159039	18.8106	17.5408	28.4949	32.152
ENSG00000073792	IGF2BP2	0.598977	1.51464	0.00594726	0.031497	21.833	24.9841	33.0692	37.9525
ENSG00000211962	IGHV1-46	0.598065	1.51369	0.0301478	0.099531	34.5443	53.6442	52.2892	89.6467
ENSG00000197355	UAP1L1	0.597646	1.51325	3.6826e-07	2.21208e-05	14.1873	8.53339	21.4688	13.1679
ENSG00000147408	CSGALNACT1	0.597009	1.51258	1.15698e-05	0.000302166	16.5242	10.9763	24.9941	18.1526
ENSG00000185386	MAPK11	0.596209	1.51174	8.03313e-06	0.000229497	7.96841	6.156	12.0461	6.82701
ENSG00000273179	AC092535.5	0.595051	1.51053	0.00532722	0.0291744	1.01906	1.1248	1.53932	1.77912
ENSG00000161835	GRASP	0.594694	1.51015	4.23479e-05	0.000818654	7.5262	6.00612	11.3657	8.46895
ENSG00000237111	IGHJ3P	0.594308	1.50975	0.0310395	0.101739	0.550141	0.827726	0.830575	1.2035
ENSG00000100453	GZMB	0.593869	1.50929	0.0108361	0.0483114	9.83815	12.1603	14.8486	20.3627
ENSG00000154133	ROBO4	0.593218	1.50861	9.67148e-05	0.00146978	18.3601	15.7542	27.6982	24.0625
ENSG00000069764	PLA2G10	0.593076	1.50846	0.0578099	0.156895	4.43098	7.28013	6.68396	11.6636
ENSG00000154096	THY1	0.592732	1.5081	0.000176159	0.00233507	75.7376	59.4564	114.22	96.8445
ENSG00000213903	LTB4R	0.5926	1.50796	4.73655e-05	0.000876147	8.86723	6.76181	13.3714	8.73384
ENSG00000160796	NBEAL2	0.591933	1.50726	1.01859e-05	0.000280802	87.7248	53.0129	132.225	89.0426
ENSG00000147459	DOCK5	0.590869	1.50615	0.000146596	0.0020354	47.0945	34.9186	70.9315	61.5118
ENSG00000115641	FHL2	0.590254	1.50551	0.000588456	0.00574021	52.3105	38.0039	78.7541	61.4964
ENSG00000131042	LILRB2	0.589889	1.50513	0.000203937	0.00258795	10.834	7.84397	16.3066	13.6173
ENSG00000148346	LCN2	0.589768	1.505	0.0451419	0.132036	125.237	244.863	188.482	293.007
ENSG00000188042	ARL4C	0.589291	1.50451	5.78626e-06	0.000184882	85.2298	45.5546	128.229	97.4606
ENSG00000137807	KIF23	0.589011	1.50422	0.0010406	0.00879081	16.3828	13.0262	24.6433	28.8486
ENSG00000211947	IGHV3-21	0.588821	1.50402	0.0313738	0.102399	41.2087	49.8455	61.9785	107.281
ENSG00000107281	NPDC1	0.587387	1.50252	0.000387182	0.00416485	37.585	33.844	56.4723	45.6104
ENSG00000170476	MZB1	0.586577	1.50168	0.00951484	0.0440539	32.1924	35.4641	48.3427	57.0479
ENSG00000070404	FSTL3	0.585802	1.50087	0.000599604	0.00581912	37.2506	31.7391	55.9084	48.7176
ENSG00000225217	HSPA7	0.585356	1.50041	0.00612552	0.0321872	8.11756	9.66865	12.1797	14.6099
ENSG00000276043	UHRF1	0.584363	1.49938	0.000703304	0.00654715	14.2512	12.9262	21.3679	19.0429
ENSG00000166510	CCDC68	0.582298	1.49723	0.000564659	0.0055572	11.1395	7.15313	16.6784	13.5606
ENSG00000186818	LILRB4	0.582231	1.49716	0.00111876	0.00924953	27.2946	22.7327	40.8644	39.9071
ENSG00000060140	STYK1	0.581112	1.496	0.000880238	0.00774569	7.81565	6.2614	11.6922	11.5555
ENSG00000167644	C19orf33	0.581056	1.49594	0.00567059	0.0304988	43.341	45.5036	64.8357	56.6795
ENSG00000198183	BPIFA1	0.580717	1.49559	0.318912	0.502172	412.292	2305.7	616.62	2420.61
ENSG00000159640	ACE	0.579442	1.49427	4.73253e-05	0.000876147	35.1043	23.726	52.4553	43.5259
ENSG00000198074	AKR1B10	0.579419	1.49425	0.30307	0.485944	67.7601	264.813	101.25	273.034
ENSG00000198125	MB	0.578667	1.49347	0.0307602	0.101026	8.23199	8.7821	12.2942	22.8517
ENSG00000133110	POSTN	0.578594	1.49339	0.00372799	0.0222879	227.535	194.944	339.8	385.322
ENSG00000128311	TST	0.578458	1.49325	9.32959e-05	0.0014389	45.4514	29.3357	67.8704	69.5354
ENSG00000115226	FNDC4	0.578265	1.49305	0.00307409	0.0194374	10.6282	13.101	15.8685	15.4375
ENSG00000108511	HOXB6	0.578059	1.49284	0.0203958	0.0755526	7.60061	15.1051	11.3465	14.2865
ENSG00000162772	ATF3	0.578031	1.49281	0.00310026	0.0195704	47.6246	47.1393	71.0945	130.142
ENSG00000166851	PLK1	0.577795	1.49257	0.000732816	0.00678316	22.4652	20.8972	33.5308	28.6618
ENSG00000137033	IL33	0.577458	1.49222	0.00577651	0.0308717	22.1241	21.0934	33.014	61.6866
ENSG00000197405	C5AR1	0.576594	1.49132	0.000171979	0.00230423	21.7194	15.1855	32.3906	34.4202
ENSG00000160211	G6PD	0.575552	1.49025	0.00717054	0.0362112	148.558	204.03	221.388	274.932
ENSG00000134955	SLC37A2	0.574689	1.48936	0.000635247	0.00607209	14.7529	10.4795	21.9724	26.1483
ENSG00000121068	TBX2	0.573947	1.48859	0.000182909	0.00239123	22.9002	16.7732	34.0891	29.0929
ENSG00000211965	IGHV3-49	0.573086	1.4877	0.0494652	0.140434	25.3819	36.8162	37.7607	72.3952
ENSG00000200879	SNORD14E	0.572683	1.48729	0.0102974	0.0465995	0.208143	0.296763	0.309568	0.333493
ENSG00000152661	GJA1	0.572309	1.4869	0.00320569	0.0200443	98.807	124.839	146.916	158.089
ENSG00000232677	LINC00665	0.571997	1.48658	0.00801172	0.0391059	20.0774	15.9329	29.8466	33.5431
ENSG00000135596	MICAL1	0.571634	1.48621	6.34223e-06	0.00019458	44.4318	27.1653	66.0348	44.3106
ENSG00000244437	IGKV3-15	0.57125	1.48581	0.031192	0.102033	50.5394	64.3064	75.0919	134.445
ENSG00000100065	CARD10	0.570634	1.48518	4.12618e-05	0.000810535	26.6541	20.6739	39.586	26.4516
ENSG00000277632	CCL3	0.570559	1.4851	0.00102116	0.00866506	6.96623	5.3019	10.3455	10.0178
ENSG00000198976	MIR429	0.570447	1.48498	0.0326249	0.105511	0.262174	0.357243	0.389324	0.499182
ENSG00000130176	CNN1	0.569821	1.48434	0.00083743	0.00744361	11.1457	8.45517	16.544	16.7822
ENSG00000145423	SFRP2	0.569607	1.48412	0.0246949	0.0868546	112.906	157.314	167.565	179.654
ENSG00000073756	PTGS2	0.569433	1.48394	0.0509089	0.143675	93.4714	198.768	138.706	180.617
ENSG00000132744	ACY3	0.569244	1.48375	0.0219548	0.0797994	4.15729	5.85738	6.16836	14.9044
ENSG00000111817	DSE	0.568085	1.48255	0.000265603	0.00315435	29.5798	23.1302	43.8536	47.5493
ENSG00000158292	GPR153	0.567696	1.48215	0.000258881	0.00309383	20.7922	13.3361	30.8172	32.5754
ENSG00000135069	PSAT1	0.566411	1.48084	0.00592548	0.03144	25.5166	21.2358	37.7858	52.1246
ENSG00000111799	COL12A1	0.564728	1.47911	0.0289799	0.0968798	128.33	226.645	189.814	270.091
ENSG00000131055	COX4I2	0.56463	1.47901	0.00107459	0.0090245	3.65726	3.48732	5.40912	5.72019
ENSG00000100558	PLEK2	0.56339	1.47774	0.000603168	0.00584376	15.3411	13.5609	22.6701	21.7445
ENSG00000019102	VSIG2	0.562434	1.47676	0.0475838	0.136898	21.0819	23.7211	31.1329	51.7237
ENSG00000148848	ADAM12	0.562172	1.47649	0.0180547	0.0693098	24.8344	37.1746	36.6678	46.0121
ENSG00000276550	HERC2P2	0.561874	1.47619	0.00290648	0.0186672	18.4837	17.2903	27.2854	20.1231
ENSG00000103241	FOXF1	0.561552	1.47586	0.000223361	0.00276788	7.25881	5.70385	10.713	9.93389
ENSG00000243264	IGKV2D-29	0.561437	1.47574	0.0887952	0.211572	8.71639	15.3197	12.8631	30.9955
ENSG00000096088	PGC	0.561252	1.47555	0.338191	0.52222	1207.71	6043.44	1782.03	6623.02
ENSG00000130635	COL5A1	0.560092	1.47436	0.00255105	0.0169471	288.944	266.992	426.009	428.086
ENSG00000231991	ANXA2P2	0.558916	1.47316	0.000317333	0.00358587	8.80324	6.34747	12.9686	13.7851
ENSG00000157214	STEAP2	0.558631	1.47287	0.00657375	0.0339488	32.3451	37.2762	47.6401	42.783
ENSG00000164078	MST1R	0.558469	1.47271	0.000239422	0.00290424	42.1168	24.4149	62.0256	48.109
ENSG00000051128	HOMER3	0.558433	1.47267	2.54937e-06	9.87395e-05	20.8173	10.5801	30.657	24.629
ENSG00000171051	FPR1	0.556643	1.47084	0.00138965	0.0107308	11.1239	9.20443	16.3616	16.6949
ENSG00000133063	CHIT1	0.555927	1.47011	0.0891639	0.212151	67.1023	89.9084	98.6481	274.782
ENSG00000153885	KCTD15	0.555047	1.46922	0.000165944	0.00224398	15.4062	14.2998	22.635	14.2225
ENSG00000168071	CCDC88B	0.554799	1.46896	8.84262e-05	0.00138437	24.0296	16.7712	35.2986	23.7281
ENSG00000173546	CSPG4	0.554403	1.46856	0.000486222	0.00495912	19.3703	17.7713	28.4465	20.3982
ENSG00000177706	FAM20C	0.553755	1.4679	3.14637e-05	0.000650535	40.3597	27.5478	59.2441	36.2389
ENSG00000037280	FLT4	0.55169	1.4658	5.1907e-05	0.000925647	17.5777	11.3389	25.7655	16.7709
ENSG00000183615	FAM167B	0.551566	1.46568	2.58169e-06	9.95434e-05	3.63866	2.03799	5.3331	3.37098
ENSG00000183397	C19orf71	0.55073	1.46483	0.000678849	0.00638137	1.59118	1.56718	2.3308	2.18637
ENSG00000111247	RAD51AP1	0.550253	1.46434	0.00131565	0.0104042	8.77019	7.59633	12.8426	12.7177
ENSG00000140398	NEIL1	0.549891	1.46398	0.000800852	0.00725406	14.4211	10.9937	21.1121	15.9147
ENSG00000159167	STC1	0.54979	1.46387	0.0152581	0.0619159	28.3359	41.6679	41.4801	54.8589
ENSG00000178726	THBD	0.548716	1.46278	0.000181651	0.00238023	33.9904	22.3674	49.7205	45.0103
ENSG00000139567	ACVRL1	0.548704	1.46277	7.94046e-06	0.0002277	28.1439	16.5571	41.1681	29.5376
ENSG00000185567	AHNAK2	0.548037	1.46209	0.021515	0.0786769	85.1909	120.006	124.557	159.765
ENSG00000119986	AVPI1	0.546839	1.46088	0.000264221	0.00314776	19.5133	14.9869	28.5065	24.2893
ENSG00000092929	UNC13D	0.546141	1.46017	0.00186575	0.0134261	53.9794	60.666	78.8194	64.6523
ENSG00000212588	SNORA26	0.545811	1.45984	0.0279744	0.094487	0.333226	0.618593	0.486457	1.24885
ENSG00000005001	PRSS22	0.5457	1.45973	0.00292678	0.0187765	25.3072	26.4105	36.9416	31.3967
ENSG00000211950	IGHV1-24	0.54445	1.45846	0.0678961	0.175936	26.2152	44.6953	38.2339	74.0289
ENSG00000109472	CPE	0.544409	1.45842	0.0171634	0.0670658	110.445	126.203	161.076	251.086
ENSG00000187688	TRPV2	0.543886	1.45789	3.53067e-05	0.000710679	22.0353	12.203	32.1251	25.4406
ENSG00000161544	CYGB	0.542859	1.45686	2.47283e-06	9.71262e-05	13.3675	7.37311	19.4745	11.524
ENSG00000142634	EFHD2	0.54136	1.45534	2.78263e-07	1.8464e-05	95.2892	43.4181	138.678	75.1523
ENSG00000211945	IGHV1-18	0.540851	1.45483	0.0422172	0.125868	65.8632	84.2175	95.8199	126.07
ENSG00000103257	SLC7A5	0.540587	1.45456	0.00437441	0.0252312	111.723	106.572	162.508	188.498
ENSG00000051180	RAD51	0.540414	1.45439	0.000512598	0.00514989	6.0282	4.2481	8.76735	6.94491
ENSG00000156970	BUB1B	0.540082	1.45406	0.00274477	0.0179006	13.3703	12.8818	19.4412	17.7316
ENSG00000110811	P3H3	0.540062	1.45404	0.000542081	0.0054033	22.5195	19.9112	32.7441	24.7827
ENSG00000211663	IGLV3-19	0.539928	1.4539	0.0414756	0.124614	71.8696	91.2907	104.491	150.286
ENSG00000129009	ISLR	0.539867	1.45384	0.00210962	0.0147712	68.9808	56.0294	100.287	117.565
ENSG00000134460	IL2RA	0.539726	1.4537	0.00425701	0.0246877	8.61101	8.0403	12.5178	14.0614
ENSG00000249751	ECSCR	0.539603	1.45357	2.57858e-05	0.000565948	2.52937	1.37371	3.67662	2.84268
ENSG00000171310	CHST11	0.539194	1.45316	1.06823e-05	0.000292368	33.193	18.8555	48.2348	30.5158
ENSG00000263639	MSMB	0.538702	1.45267	0.284226	0.464073	29.915	118.514	43.4564	156.737
ENSG00000162444	RBP7	0.538209	1.45217	0.00216802	0.015106	2.25301	1.68969	3.27176	3.84225
ENSG00000157456	CCNB2	0.538095	1.45205	0.00246747	0.0165586	18.1514	14.3218	26.3569	44.8091
ENSG00000107719	PALD1	0.534764	1.44871	1.47878e-05	0.000366564	14.7345	7.6532	21.346	13.8174
ENSG00000137309	HMGA1	0.532462	1.4464	0.000361637	0.00393457	217.915	165.341	315.191	251.837
ENSG00000221500	SNORD100	0.532128	1.44606	0.00108888	0.00909634	0.221167	0.154664	0.319821	0.251543
ENSG00000168010	ATG16L2	0.531903	1.44583	0.000497684	0.0050515	21.5081	15.3785	31.0972	24.3887
ENSG00000214193	SH3D21	0.531578	1.44551	0.000146354	0.0020354	9.40553	6.34478	13.5958	9.91244
ENSG00000211967	IGHV3-53	0.531516	1.44545	0.0324295	0.105087	10.1796	10.7915	14.7141	19.4288
ENSG00000006118	TMEM132A	0.531216	1.44515	0.000436735	0.00454786	48.4249	31.5791	69.9811	49.209
ENSG00000089820	ARHGAP4	0.529616	1.44354	0.000199779	0.00254757	41.0714	28.2034	59.2883	37.2127
ENSG00000117394	SLC2A1	0.528985	1.44291	0.0102439	0.046431	137.205	150.553	197.974	208.768
ENSG00000059728	MXD1	0.528323	1.44225	2.85016e-05	0.000606095	27.9007	17.467	40.2398	35.5584
ENSG00000171345	KRT19	0.527899	1.44183	0.000565312	0.0055572	601.421	449.984	867.146	622.027
ENSG00000160867	FGFR4	0.527688	1.44162	0.017883	0.068859	12.8747	14.4743	18.5604	22.5804
ENSG00000105472	CLEC11A	0.527626	1.44156	0.000111512	0.00164643	9.54587	6.46006	13.7609	10.6224
ENSG00000164109	MAD2L1	0.527456	1.44139	0.00512351	0.028372	18.7538	16.8527	27.0314	34.4806
ENSG00000138162	TACC2	0.526887	1.44082	0.00873656	0.0413393	114.046	111.966	164.32	269.386
ENSG00000142173	COL6A2	0.526599	1.44053	0.000798849	0.00725207	372.602	279.116	536.743	423.177
ENSG00000146670	CDCA5	0.526503	1.44043	0.0037529	0.022392	20.5205	20.4408	29.5584	25.5113
ENSG00000102802	MEDAG	0.52564	1.43957	0.00969542	0.0446365	7.0369	7.51126	10.1301	10.6507
ENSG00000115963	RND3	0.525452	1.43938	0.000766621	0.00703332	25.968	22.15	37.3779	28.5076
ENSG00000106853	PTGR1	0.525358	1.43929	0.00362791	0.0219127	47.5389	57.3025	68.4223	93.0479
ENSG00000153234	NR4A2	0.525236	1.43917	0.0232864	0.0833387	30.7036	55.9127	44.1877	65.7208
ENSG00000042980	ADAM28	0.525202	1.43913	0.0079278	0.0388493	30.9452	30.2287	44.5343	62.5455
ENSG00000101825	MXRA5	0.524596	1.43853	0.00831387	0.040034	116.866	138.312	168.115	165.203
ENSG00000087245	MMP2	0.524413	1.43835	0.00059626	0.00580146	288.151	219.527	414.462	328.992
ENSG00000164647	STEAP1	0.523759	1.4377	0.023716	0.0843426	20.5576	28.5726	29.5556	36.4612
ENSG00000211970	IGHV4-61	0.522999	1.43694	0.0771271	0.192405	5.41358	13.1161	7.77899	12.7783
ENSG00000250318	AC003072.1	0.522824	1.43677	0.000139463	0.00196021	1.41837	0.788963	2.03787	1.6674
ENSG00000084731	KIF3C	0.521502	1.43545	0.00242859	0.0164106	17.1259	14.173	24.5834	20.4365
ENSG00000124143	ARHGAP40	0.520875	1.43482	0.0555693	0.152933	10.2484	10.7502	14.7047	18.1972
ENSG00000143382	ADAMTSL4	0.520261	1.43421	0.00107786	0.00903868	20.1626	13.7692	28.9175	24.1174
ENSG00000110080	ST3GAL4	0.519943	1.4339	8.92662e-05	0.0013937	28.982	23.9559	41.5572	33.0764
ENSG00000039523	RIPOR1	0.519742	1.4337	7.73285e-07	3.87188e-05	45.5065	22.1062	65.2426	31.257
ENSG00000197696	NMB	0.518509	1.43247	0.00393049	0.0232428	8.01344	8.57818	11.4791	15.4486
ENSG00000226328	NUP50-DT	0.517986	1.43195	0.000201177	0.00256027	6.27291	6.83525	8.98253	6.89742
ENSG00000277030	MIR8071-2	0.517803	1.43177	0.0368087	0.114593	0.294082	0.334496	0.421058	0.607521
ENSG00000169403	PTAFR	0.517582	1.43155	0.00113433	0.00932713	31.3743	22.3482	44.9141	35.2698
ENSG00000244486	SCARF2	0.517277	1.43125	0.000606874	0.0058697	10.9673	8.02516	15.6969	13.2013
ENSG00000169679	BUB1	0.517221	1.4312	0.00333559	0.0206196	21.9013	16.7695	31.3451	31.3181
ENSG00000100083	GGA1	0.517167	1.43114	5.79925e-09	9.9508e-07	57.7611	21.7138	82.6644	52.7763
ENSG00000137331	IER3	0.516746	1.43072	0.000711922	0.00661658	79.181	64.3846	113.286	88.7468
ENSG00000107968	MAP3K8	0.515925	1.42991	2.57273e-05	0.000565753	17.0864	10.9347	24.4321	16.1342
ENSG00000188483	IER5L	0.515771	1.42976	0.00136164	0.0106441	13.2342	13.3184	18.9218	16.2826
ENSG00000131097	HIGD1B	0.515499	1.42949	0.00510511	0.0282838	2.56255	2.37176	3.66313	4.64771
ENSG00000120675	DNAJC15	0.515056	1.42905	0.000142264	0.00198492	36.9238	19.0045	52.7659	39.2649
ENSG00000104142	VPS18	0.514924	1.42892	7.29573e-09	1.19581e-06	34.8904	10.7591	49.8556	29.9891
ENSG00000233999	IGKV3OR2-268	0.514138	1.42814	0.0593906	0.159789	1.24288	1.85211	1.775	4.54962
ENSG00000109089	CDR2L	0.513572	1.42758	6.49439e-05	0.00108681	31.8071	18.6389	45.4073	33.4494
ENSG00000158747	NBL1	0.512714	1.42673	0.000179313	0.00235771	55.6951	36.7226	79.4619	52.222
ENSG00000129946	SHC2	0.512272	1.42629	0.00746481	0.0371386	22.2	18.5799	31.6638	37.4395
ENSG00000121578	B4GALT4	0.512124	1.42615	1.31877e-06	5.78889e-05	27.0764	10.6616	38.615	26.6502
ENSG00000139278	GLIPR1	0.511478	1.42551	0.000282894	0.00331146	21.6476	11.6484	30.8589	35.4117
ENSG00000269899	AC025857.2	0.511391	1.42542	0.00026723	0.00316708	1.00554	0.706629	1.43332	1.03353
ENSG00000134824	FADS2	0.510858	1.4249	0.00676454	0.0346516	90.9413	76.8254	129.582	117.145
ENSG00000135127	BICDL1	0.51062	1.42466	0.00597818	0.0315729	20.6372	23.9472	29.4011	30.7704
ENSG00000211955	IGHV3-33	0.510272	1.42432	0.0787451	0.194781	28.9642	44.083	41.2542	75.6824
ENSG00000168404	MLKL	0.509986	1.42404	1.07287e-05	0.000292799	18.2653	9.0554	26.0105	16.5531
ENSG00000115163	CENPA	0.509871	1.42392	0.0139234	0.0582383	5.72328	5.85458	8.1495	9.50574
ENSG00000050820	BCAR1	0.509558	1.42361	3.24585e-07	2.09293e-05	67.0778	29.2016	95.4928	44.5072
ENSG00000264112	AC015813.1	0.50915	1.42321	0.00590083	0.0313474	11.9611	12.5716	17.0232	14.4016
ENSG00000177469	CAVIN1	0.508938	1.423	5.61524e-05	0.000978423	163.893	92.6169	233.22	152.217
ENSG00000153162	BMP6	0.508889	1.42295	0.0906874	0.214671	11.1428	26.7705	15.8557	29.2269
ENSG00000087266	SH3BP2	0.507973	1.42205	2.1513e-08	2.58451e-06	48.9098	19.6888	69.5522	31.4083
ENSG00000163053	SLC16A14	0.506011	1.42012	0.0975426	0.22664	29.9815	66.0579	42.5773	72.7891
ENSG00000223612	AC241585.1	0.505825	1.41993	0.000637515	0.00608867	2.26364	1.54987	3.21423	5.58647
ENSG00000075218	GTSE1	0.505767	1.41988	0.00414802	0.0242155	9.76619	8.84233	13.8668	10.9317
ENSG00000185989	RASA3	0.505438	1.41955	3.97765e-05	0.000792268	18.5247	11.4849	26.2968	15.6591
ENSG00000198431	TXNRD1	0.505253	1.41937	0.0263002	0.0908761	326.243	469.228	463.06	647.948
ENSG00000170638	TRABD	0.504979	1.4191	1.66305e-08	2.20702e-06	43.5118	19.0473	61.7477	24.3782
ENSG00000181374	CCL13	0.504731	1.41886	0.0461522	0.134011	12.2709	16.1196	17.4107	37.0575
ENSG00000128602	SMO	0.503095	1.41725	0.00988725	0.0452451	13.5152	17.4814	19.1544	24.7497
ENSG00000177337	DLGAP1-AS1	0.503078	1.41723	0.00117783	0.00958813	8.46638	7.00356	11.9988	12.4092
ENSG00000144366	GULP1	0.501879	1.41606	0.00800877	0.0391059	29.1086	29.6443	41.2194	41.2438
ENSG00000196878	LAMB3	0.501646	1.41583	0.00733615	0.0368033	357.879	316.043	506.696	451.127
ENSG00000274172	MIR8071-1	0.500669	1.41487	0.0489937	0.139652	0.179586	0.227787	0.25409	0.342574
ENSG00000139926	FRMD6	0.500379	1.41459	0.0035005	0.0213757	24.5645	19.7076	34.7486	36.6931
ENSG00000170909	OSCAR	0.499923	1.41414	0.00390024	0.0230879	10.4559	8.0692	14.786	16.5663
ENSG00000211964	IGHV3-48	0.499711	1.41393	0.0792566	0.195749	11.2252	18.8699	15.8716	26.4094
ENSG00000122679	RAMP3	0.499632	1.41385	0.00184755	0.0133204	11.9836	10.0376	16.943	15.7472
ENSG00000121152	NCAPH	0.498658	1.4129	0.0072166	0.0364116	12.8228	10.3876	18.1173	19.03
ENSG00000211899	IGHM	0.497775	1.41203	0.080145	0.197005	767.731	1194.89	1084.06	2369.93
ENSG00000171223	JUNB	0.497141	1.41141	4.54528e-05	0.000849023	157.337	119.691	222.068	125.679
ENSG00000120647	CCDC77	0.496648	1.41093	1.7587e-05	0.00041904	8.05335	4.06211	11.3627	12.902
ENSG00000142657	PGD	0.496622	1.41091	0.00168327	0.0123863	225.777	248.355	318.55	308.22
ENSG00000164877	MICALL2	0.495302	1.40962	0.0010394	0.00878714	48.8264	36.7713	68.8265	50.1085
ENSG00000211905	IGHJ1	0.494268	1.40861	0.0986159	0.228575	0.28923	0.558889	0.407411	0.732736
ENSG00000130201		0.494025	1.40837	0.000334247	0.00372834	3.95671	2.64546	5.57251	4.0273
ENSG00000143387	CTSK	0.493607	1.40796	0.00359297	0.0217426	65.3763	52.5837	92.0472	95.7668
ENSG00000125910	S1PR4	0.493398	1.40776	0.000738011	0.00681466	5.37834	3.20746	7.57139	5.64164
ENSG00000211893	IGHG2	0.493261	1.40762	0.0433513	0.128024	532.103	656.75	749.001	822.793
ENSG00000122641	INHBA	0.492889	1.40726	0.00865012	0.0410153	43.4622	40.9782	61.1626	68.2006
ENSG00000154832	CXXC1	0.492888	1.40726	2.5353e-10	9.63006e-08	36.9406	11.9874	51.9849	19.6811
ENSG00000094804	CDC6	0.492071	1.40646	0.00661009	0.0340284	19.6147	17.5822	27.5873	24.4232
ENSG00000150782	IL18	0.491668	1.40607	0.00124575	0.00999136	19.8537	12.7691	27.9157	18.2308
ENSG00000078098	FAP	0.491269	1.40568	0.00652474	0.0337872	19.9228	17.0612	28.0051	30.1893
ENSG00000106538	RARRES2	0.491096	1.40551	0.00221819	0.0153711	68.0936	59.8096	95.7063	79.5817
ENSG00000277054		0.49109	1.40551	0.0393663	0.120252	0.210163	0.258736	0.295385	0.337886
ENSG00000167615	LENG8	0.490084	1.40453	0.000554395	0.00550161	136.023	95.4366	191.047	119.207
ENSG00000080031	PTPRH	0.489886	1.40433	0.0759749	0.190404	14.7201	16.2976	20.672	28.5482
ENSG00000142227	EMP3	0.489541	1.404	0.00014658	0.0020354	33.2774	17.7705	46.7214	35.9833
ENSG00000128309	MPST	0.488679	1.40316	1.48065e-05	0.000366564	57.2332	29.2604	80.3072	60.1972
ENSG00000185022	MAFF	0.48799	1.40249	2.25888e-05	0.000510506	26.804	11.5416	37.5924	33.8871
ENSG00000213553	RPLP0P6	0.487814	1.40232	0.00933	0.0434981	7.01162	6.63893	9.83253	13.2335
ENSG00000204291	COL15A1	0.487653	1.40216	0.0128066	0.0545581	57.157	65.1666	80.1433	76.5408
ENSG00000176435	CLEC14A	0.487066	1.40159	0.000198239	0.00253755	20.8638	12.2301	29.2425	22.2604
ENSG00000186594	MIR22HG	0.486992	1.40152	1.58725e-05	0.000386253	17.2353	7.94141	24.1557	14.0432
ENSG00000132535	DLG4	0.485448	1.40002	2.97458e-05	0.00062406	10.7944	6.29104	15.1123	8.4605
ENSG00000164237	CMBL	0.485284	1.39986	0.0390351	0.119535	51.1295	52.2832	71.5742	126.29
ENSG00000146094	DOK3	0.485216	1.3998	0.000151884	0.00209553	13.3556	7.55679	18.6951	12.521
ENSG00000173530	TNFRSF10D	0.484709	1.3993	0.000724592	0.00672886	10.6514	8.35356	14.9046	9.66878
ENSG00000125810	CD93	0.484058	1.39867	0.000692984	0.00647519	78.4489	55.3204	109.724	81.4659
ENSG00000211648	IGLV1-47	0.483899	1.39852	0.0662322	0.172907	45.4101	60.1672	63.5069	95.5578
ENSG00000188403	IGHV1OR15-9	0.48364	1.39827	0.082763	0.201574	1.09181	1.77106	1.52664	2.59952
ENSG00000157510	AFAP1L1	0.483585	1.39821	4.22486e-05	0.000818647	10.791	6.35304	15.0882	8.99735
ENSG00000145632	PLK2	0.483541	1.39817	0.000778065	0.00710974	42.8374	40.1893	59.894	45.779
ENSG00000149591	TAGLN	0.483084	1.39773	0.00170442	0.0125044	169.896	118.557	237.468	244.844
ENSG00000059377	TBXAS1	0.482559	1.39722	0.00033808	0.00375706	26.8613	18.0697	37.5312	29.5051
ENSG00000115129	TP53I3	0.482384	1.39705	7.12542e-05	0.0011755	35.4272	23.3496	49.4936	29.0704
ENSG00000127329	PTPRB	0.482202	1.39687	0.00173353	0.0126744	35.2885	25.2694	49.2936	46.3572
ENSG00000081041	CXCL2	0.481175	1.39588	0.0288213	0.0964395	33.9043	37.5415	47.3263	56.0104
ENSG00000038427	VCAN	0.481127	1.39583	0.013436	0.056606	218.399	240.568	304.848	305.152
ENSG00000136859	ANGPTL2	0.481043	1.39575	0.00188228	0.0135029	49.9946	44.5894	69.7801	57.7412
ENSG00000089127	OAS1	0.480745	1.39546	0.0046498	0.0265076	83.4711	76.1708	116.481	124.4
ENSG00000128016	ZFP36	0.479774	1.39453	0.0057522	0.0308071	227.532	210.381	317.299	353.287
ENSG00000260027	HOXB7	0.47968	1.39443	0.0477923	0.137255	10.1534	13.0073	14.1582	14.4706
ENSG00000158715	SLC45A3	0.479653	1.39441	0.000685044	0.00641905	12.5421	7.29423	17.4888	16.4533
ENSG00000185340	GAS2L1	0.479617	1.39437	3.02268e-06	0.000112111	20.859	11.2688	29.0853	13.7784
ENSG00000050555	LAMC3	0.477649	1.39247	0.0159631	0.0638335	17.4873	21.4821	24.3506	23.4104
ENSG00000166401	SERPINB8	0.477109	1.39195	5.02687e-06	0.000165814	14.8601	6.62752	20.6845	10.7469
ENSG00000106665	CLIP2	0.47637	1.39124	0.000485824	0.00495912	19.0927	16.2597	26.5625	17.8661
ENSG00000178531	CTXN1	0.475972	1.39085	0.0149133	0.0608313	6.40864	9.07509	8.91348	7.91152
ENSG00000122862	SRGN	0.475842	1.39073	0.00165466	0.0122184	127.772	93.451	177.697	162.29
ENSG00000135643	KCNMB4	0.47576	1.39065	0.0543179	0.150761	14.3208	22.7712	19.9152	27.2186
ENSG00000088882	CPXM1	0.475677	1.39057	0.0226704	0.0817495	14.7604	44.1311	20.5253	17.3424
ENSG00000211677	IGLC2	0.475503	1.3904	0.0462976	0.134302	312.553	387.825	434.575	457.465
ENSG00000124664	SPDEF	0.47411	1.38906	0.0349712	0.11063	36.9901	38.1848	51.3815	50.4503
ENSG00000154217	PITPNC1	0.473888	1.38885	0.00246791	0.0165586	36.4872	31.7084	50.6752	51.9738
ENSG00000100379	KCTD17	0.472626	1.38763	4.61687e-06	0.00015461	13.3468	6.24873	18.5204	9.02224
ENSG00000105974	CAV1	0.472433	1.38745	0.015947	0.0638335	113.36	141.99	157.281	197.508
ENSG00000022567	SLC45A4	0.472147	1.38717	0.00112604	0.00927906	40.9075	23.1895	56.7457	62.5342
ENSG00000161960	EIF4A1	0.472117	1.38714	9.69058e-05	0.00147073	9.95359	5.58395	13.8071	7.08806
ENSG00000173559	NABP1	0.471817	1.38685	0.000353622	0.0038695	30.5248	19.3106	42.3335	28.1057
ENSG00000177595	PIDD1	0.471666	1.38671	0.000168762	0.00227132	16.5432	11.3062	22.9407	13.8052
ENSG00000182541	LIMK2	0.471428	1.38648	3.40775e-07	2.13696e-05	49.7803	20.8885	69.0194	33.7831
ENSG00000162366	PDZK1IP1	0.471074	1.38614	0.0424519	0.126239	70.0493	78.7071	97.0982	113.784
ENSG00000182796	TMEM198B	0.470801	1.38588	5.69746e-05	0.000986725	13.0373	9.11946	18.0681	10.0223
ENSG00000112699	GMDS	0.470672	1.38576	0.000276187	0.00324961	27.5948	16.1499	38.2396	36.7983
ENSG00000133216	EPHB2	0.470641	1.38572	0.0121872	0.0525765	32.0919	28.2045	44.4705	48.9793
ENSG00000139112	GABARAPL1	0.470587	1.38567	0.000137931	0.00194107	58.7994	31.4165	81.4768	78.5835
ENSG00000198018	ENTPD7	0.468036	1.38322	5.14554e-05	0.000921916	14.0796	7.41271	19.4753	12.9405
ENSG00000145386	CCNA2	0.467943	1.38314	0.0105855	0.0474927	18.588	17.3282	25.7097	26.5338
ENSG00000095370	SH2D3C	0.467691	1.38289	0.000104497	0.00156102	15.8152	8.66336	21.8707	14.0489
ENSG00000161265	U2AF1L4	0.467652	1.38286	3.09151e-05	0.000642685	8.02007	4.06969	11.0906	6.40889
ENSG00000102962	CCL22	0.467438	1.38265	0.056975	0.155352	14.9118	18.3216	20.6178	49.572
ENSG00000132386	SERPINF1	0.466786	1.38203	0.0078823	0.0386761	128.413	108.702	177.471	201.525
ENSG00000224397	SMIM25	0.466611	1.38186	0.00838866	0.0402268	9.60715	8.83264	13.2757	14.4539
ENSG00000069956	MAPK6	0.466309	1.38157	7.26756e-06	0.000214883	49.0098	19.1614	67.7105	46.9256
ENSG00000128335	APOL2	0.465533	1.38083	4.17729e-05	0.000813573	52.0915	26.6857	71.9294	46.1872
ENSG00000134285	FKBP11	0.465505	1.3808	5.18403e-05	0.000925647	43.6941	23.9777	60.3328	35.4363
ENSG00000208772	SNORD94	0.465501	1.3808	0.0941528	0.220741	0.517942	1.46495	0.715173	2.86003
ENSG00000141068	KSR1	0.46419	1.37954	0.00371767	0.0222728	39.2355	39.2156	54.127	39.7874
ENSG00000236871	LINC00106	0.463915	1.37928	0.0354412	0.111557	1.59524	1.6862	2.20028	2.01851
ENSG00000085840	ORC1	0.463151	1.37855	0.00700502	0.035523	6.5979	6.01395	9.09553	8.39312
ENSG00000170345	FOS	0.462782	1.3782	0.0225423	0.0813881	307.832	313.527	424.253	495.545
ENSG00000117122	MFAP2	0.462709	1.37813	0.0100619	0.0457597	28.4839	38.8029	39.2544	40.3165
ENSG00000019549	SNAI2	0.46264	1.37806	0.0143868	0.0594916	9.49739	10.8305	13.088	14.9927
ENSG00000186998	EMID1	0.462078	1.37752	0.00933585	0.0435076	10.917	10.1824	15.0384	24.6765
ENSG00000076706	MCAM	0.461507	1.37698	0.00148086	0.0112824	81.7687	58.7262	112.594	97.3717
ENSG00000182853	VMO1	0.461192	1.37668	0.00851636	0.0405495	3.64601	4.09634	5.01938	4.99179
ENSG00000138166	DUSP5	0.461061	1.37655	0.00424827	0.0246683	39.2061	30.8034	53.9693	50.8974
ENSG00000128567	PODXL	0.459606	1.37517	5.63579e-05	0.000979679	73.4126	31.31	100.955	97.9171
ENSG00000171388	APLN	0.459569	1.37513	0.0310973	0.101897	12.5923	16.6587	17.3161	25.1721
ENSG00000176014	TUBB6	0.45915	1.37473	0.000998514	0.00851086	44.3509	33.1488	60.9706	43.6523
ENSG00000244734	HBB	0.458989	1.37458	0.131126	0.278204	38.098	66.6383	52.3687	123.942
ENSG00000125503	PPP1R12C	0.45898	1.37457	2.07195e-07	1.44078e-05	50.8998	20.4515	69.9653	28.7349
ENSG00000198355	PIM3	0.457916	1.37356	3.92432e-05	0.000783012	110.091	56.1045	151.217	86.4396
ENSG00000170421	KRT8	0.45782	1.37346	0.000313637	0.00355977	967.566	619.247	1328.92	781.734
ENSG00000177666	PNPLA2	0.457666	1.37332	1.56375e-05	0.000384635	71.479	34.0403	98.1634	51.7288
ENSG00000170369	CST2	0.457617	1.37327	0.117367	0.25864	2.38236	3.62467	3.27163	5.25661
ENSG00000200534	SNORA33	0.457281	1.37295	0.00375325	0.022392	0.629738	0.455839	0.8646	0.734191
ENSG00000120306	CYSTM1	0.457146	1.37282	0.000558059	0.00552396	59.2402	30.0655	81.3264	86.0953
ENSG00000181830	SLC35C1	0.457047	1.37273	0.000130252	0.00185557	51.4739	48.6878	70.6598	41.577
ENSG00000117114	ADGRL2	0.456952	1.37264	0.00366774	0.0220872	35.6055	32.3613	48.8734	43.1842
ENSG00000149781	FERMT3	0.456512	1.37222	0.000839289	0.00744556	35.1027	21.1223	48.1686	34.7409
ENSG00000060718	COL11A1	0.455605	1.37136	0.221751	0.394221	64.3943	134.509	88.3077	154.815
ENSG00000138772	ANXA3	0.455503	1.37126	0.00736773	0.0368645	48.0145	35.9073	65.8403	59.3939
ENSG00000065357	DGKA	0.455243	1.37101	0.000425401	0.00445074	28.5516	20.2108	39.1446	31.2729
ENSG00000103490	PYCARD	0.455038	1.37082	0.00316568	0.0198948	20.3207	16.6825	27.856	28.4826
ENSG00000010292	NCAPD2	0.455021	1.3708	0.000174259	0.00231797	75.2231	44.9332	103.116	73.3518
ENSG00000171346	KRT15	0.454939	1.37073	0.0897106	0.212906	43.295	71.9224	59.3456	115.535
ENSG00000184730	APOBR	0.454621	1.37042	0.00456136	0.0261339	16.3936	12.4647	22.4662	22.2211
ENSG00000028137	TNFRSF1B	0.45395	1.36979	0.000179235	0.00235771	57.9642	30.0305	79.3985	60.1104
ENSG00000170458	CD14	0.453898	1.36974	0.00264759	0.0174362	84.185	76.0988	115.311	83.5892
ENSG00000122877	EGR2	0.453346	1.36921	0.0024024	0.0162722	12.0636	7.77588	16.5177	15.2715
ENSG00000211666	IGLV2-14	0.453322	1.36919	0.0813543	0.19912	108.094	114.92	148.002	213.851
ENSG00000090376	IRAK3	0.45203	1.36796	0.0157118	0.0631403	27.0855	38.8813	37.0519	34.6408
ENSG00000203485	INF2	0.452012	1.36795	0.000124274	0.00178603	113.09	69.2791	154.702	90.6696
ENSG00000071246	VASH1	0.451588	1.36755	0.000403995	0.00430112	23.2952	20.2232	31.8572	17.2346
ENSG00000074370	ATP2A3	0.451243	1.36722	0.0172484	0.0672209	78.7583	123.396	107.68	99.2604
ENSG00000186340	THBS2	0.450546	1.36656	0.0315271	0.10264	193.622	231.072	264.595	315.549
ENSG00000278828	H3C10	0.45019	1.36622	0.0618537	0.164554	4.09376	4.74806	5.59298	9.20172
ENSG00000104856	RELB	0.450122	1.36616	3.01056e-06	0.000112111	25.2787	10.539	34.5346	16.8543
ENSG00000226608	FTLP3	0.449987	1.36603	0.0102907	0.0465879	4.31605	4.21261	5.89585	6.19535
ENSG00000182704	TSKU	0.449863	1.36591	0.0109802	0.0488185	60.7137	67.0923	82.9294	83.3874
ENSG00000163430	FSTL1	0.449132	1.36522	0.00190591	0.0136292	205.704	154.196	280.831	253.774
ENSG00000127586	CHTF18	0.448783	1.36489	0.00126435	0.0101056	16.1034	11.0265	21.9794	14.113
ENSG00000064687	ABCA7	0.44863	1.36474	0.000605022	0.00585676	33.5586	21.08	45.7989	28.1305
ENSG00000130489		0.448516	1.36464	1.13861e-05	0.000300589	20.0246	11.6192	27.3264	12.7399
ENSG00000172638	EFEMP2	0.448261	1.36439	0.000201447	0.00256027	38.2651	24.2512	52.2087	32.2185
ENSG00000184922	FMNL1	0.448067	1.36421	0.000335464	0.00373527	45.4705	29.4463	62.0314	38.3387
ENSG00000111641	NOP2	0.447858	1.36401	1.62895e-06	6.88564e-05	40.5262	17.286	55.2783	24.732
ENSG00000114346	ECT2	0.446606	1.36283	0.00224366	0.0154631	47.2635	31.3157	64.4121	52.0531
ENSG00000124006	OBSL1	0.44652	1.36275	0.00305899	0.0193741	72.3852	49.179	98.6429	87.0793
ENSG00000140682	TGFB1I1	0.445043	1.36135	0.000174537	0.00231897	21.1633	11.4464	28.8107	18.5399
ENSG00000007376	RPUSD1	0.445014	1.36133	8.77725e-06	0.000249191	22.8399	9.24427	31.0925	18.6323
ENSG00000136383	ALPK3	0.444843	1.36117	0.0473371	0.13636	45.5408	45.5271	61.9886	55.4028
ENSG00000136636	KCTD3	0.444768	1.36109	0.000286037	0.0033414	39.7426	27.7163	54.0934	27.2731
ENSG00000152056	AP1S3	0.444466	1.36081	0.000671243	0.00633656	11.0889	6.73511	15.0899	11.5924
ENSG00000185361	TNFAIP8L1	0.444132	1.3605	1.12202e-05	0.000298499	18.5543	8.37509	25.243	12.5396
ENSG00000197892	KIF13B	0.443925	1.3603	0.00330761	0.0204606	58.5672	45.8803	79.6689	66.4439
ENSG00000275301		0.443622	1.36001	0.0961055	0.224261	0.263788	0.424742	0.358756	0.688462
ENSG00000135245	HILPDA	0.443334	1.35974	0.0402096	0.122116	26.9177	46.021	36.6012	75.1785
ENSG00000137936	BCAR3	0.443307	1.35972	0.0016502	0.012206	21.2311	17.7432	28.8683	26.3682
ENSG00000105722	ERF	0.443166	1.35958	1.53318e-07	1.10748e-05	35.3799	13.1035	48.102	25.6763
ENSG00000141448	GATA6	0.442348	1.35881	0.0151127	0.0615125	13.2281	13.7091	17.9745	17.1423
ENSG00000125753	VASP	0.441724	1.35823	6.17734e-08	6.07775e-06	115.56	37.0681	156.957	72.6728
ENSG00000233901	LINC01503	0.440699	1.35726	0.00101088	0.00860338	4.0478	2.82711	5.49392	4.56302
ENSG00000180447	GAS1	0.440527	1.3571	0.0330513	0.106408	7.77426	11.0175	10.5505	13.6773
ENSG00000120820	GLT8D2	0.440505	1.35708	0.00681654	0.0348385	8.00239	6.30214	10.8599	11.0516
ENSG00000113083	LOX	0.440342	1.35693	0.0142766	0.0592721	37.9539	39.1403	51.5006	58.5635
ENSG00000135636	DYSF	0.440339	1.35692	0.00138653	0.0107308	35.8752	23.0284	48.6799	34.2811
ENSG00000142347	MYO1F	0.4396	1.35623	0.000991729	0.00847201	31.7973	18.2406	43.1245	32.1016
ENSG00000255717	SNHG1	0.437515	1.35427	0.00113376	0.00932713	37.1799	22.95	50.3517	57.6853
ENSG00000129824	RPS4Y1	0.437352	1.35412	0.432272	0.610704	69.3993	135.105	93.9748	155.325
ENSG00000185052	SLC24A3	0.437142	1.35392	0.018595	0.0706615	10.2398	8.35846	13.8638	17.0934
ENSG00000206754	SNORD101	0.436627	1.35344	0.00636651	0.0331002	0.151118	0.10225	0.204528	0.148323
ENSG00000163823	CCR1	0.435988	1.35284	0.00379998	0.0226471	17.296	12.3288	23.3986	21.1828
ENSG00000114115	RBP1	0.434886	1.3518	0.0151753	0.0617116	12.5452	24.7927	16.9587	20.9029
ENSG00000147535	PLPP5	0.434437	1.35138	0.000287759	0.00335464	52.6992	27.1638	71.2168	81.842
ENSG00000135838	NPL	0.43381	1.3508	0.00388331	0.0230115	27.0704	18.7083	36.5666	37.4552
ENSG00000164050	PLXNB1	0.433731	1.35072	0.000580457	0.00567188	78.7338	47.8124	106.347	56.683
ENSG00000172009	THOP1	0.433547	1.35055	1.59366e-06	6.76149e-05	30.9069	14.6889	41.7413	18.9493
ENSG00000113140	SPARC	0.433408	1.35042	0.0027133	0.0177359	1138.27	749.103	1537.14	1420
ENSG00000023734	STRAP	0.433321	1.35034	3.29233e-06	0.000119667	94.8543	39.4583	128.085	67.3665
ENSG00000142512	SIGLEC10	0.431351	1.3485	0.0115154	0.0504476	11.0706	10.1157	14.9287	12.1127
ENSG00000161618	ALDH16A1	0.431069	1.34823	1.02217e-05	0.000281109	28.2461	13.4001	38.0823	18.6942
ENSG00000100304	TTLL12	0.431011	1.34818	0.000326432	0.00365303	54.6118	34.032	73.6265	48.4037
ENSG00000141756	FKBP10	0.429934	1.34717	0.0145204	0.0598168	113.667	115.449	153.129	117.86
ENSG00000185291	IL3RA	0.429821	1.34707	0.000161711	0.00219715	9.71576	4.26809	13.0878	8.73987
ENSG00000138434	ITPRID2	0.429635	1.34689	5.56963e-06	0.000181618	98.3704	38.667	132.494	84.5095
ENSG00000172819	RARG	0.429405	1.34668	0.000827074	0.00739765	29.6225	22.4254	39.8919	28.3725
ENSG00000131620	ANO1	0.429301	1.34658	0.0291527	0.0973178	26.1286	23.7213	35.1843	56.8359
ENSG00000269131		0.428916	1.34622	0.000802328	0.00725592	8.59464	5.20472	11.5703	6.53176
ENSG00000137841	PLCB2	0.428871	1.34618	0.00537451	0.0293349	30.2333	18.9372	40.6995	33.8882
ENSG00000160213	CSTB	0.428342	1.34569	0.00038602	0.00415627	260.338	146.813	350.333	248.346
ENSG00000154783	FGD5	0.428142	1.3455	0.000677994	0.00638137	18.4433	10.9663	24.8154	16.4842
ENSG00000100368	CSF2RB	0.427741	1.34513	0.00232877	0.0159039	22.447	14.0281	30.194	20.3952
ENSG00000137809	ITGA11	0.427686	1.34507	0.0641787	0.169201	40.661	51.3076	54.6922	77.6192
ENSG00000141526	SLC16A3	0.427185	1.34461	0.00536798	0.0293133	168.078	158.779	225.998	152.15
ENSG00000130758	MAP3K10	0.426574	1.34404	0.000103012	0.00154086	12.5405	6.88417	16.8549	9.464
ENSG00000132746	ALDH3B2	0.426049	1.34355	0.0800734	0.196889	8.78405	16.2835	11.8018	15.8394
ENSG00000173801	JUP	0.426003	1.34351	7.12737e-05	0.0011755	350.784	166.464	471.28	260.73
ENSG00000078237	TIGAR	0.425752	1.34327	1.73403e-07	1.23691e-05	11.6022	4.61427	15.5849	5.97544
ENSG00000105523	FAM83E	0.425601	1.34313	0.00953832	0.0440819	35.4769	23.9377	47.6501	37.0618
ENSG00000100299	ARSA	0.42536	1.34291	8.52969e-05	0.0013409	50.595	25.7572	67.9444	34.8405
ENSG00000110446	SLC15A3	0.425149	1.34271	0.00251176	0.016725	43.1521	25.1727	57.9408	48.0214
ENSG00000107796	ACTA2	0.424977	1.34255	0.00468102	0.0266589	168.576	116.273	226.322	207.18
ENSG00000182511	FES	0.424771	1.34236	1.47149e-05	0.000365885	23.2937	9.95736	31.2685	14.8282
ENSG00000089060	SLC8B1	0.424426	1.34204	1.8892e-06	7.71926e-05	43.4937	15.4798	58.3702	30.7795
ENSG00000164976	MYORG	0.424393	1.34201	0.00266047	0.0174908	23.5095	16.303	31.55	23.8989
ENSG00000184508	HDDC3	0.424134	1.34177	1.78889e-05	0.00042358	7.75985	3.00952	10.4119	7.91981
ENSG00000137713	PPP2R1B	0.423562	1.34124	4.47491e-05	0.000841386	36.4133	16.1702	48.8388	35.5123
ENSG00000110079	MS4A4A	0.423146	1.34085	0.0107596	0.048119	21.1997	15.58	28.4256	27.1898
ENSG00000101384	JAG1	0.42269	1.34042	0.00486806	0.027378	49.1516	45.5936	65.884	59.8484
ENSG00000074660	SCARF1	0.422554	1.3403	0.00779468	0.0383944	19.4398	17.0799	26.0551	27.075
ENSG00000280527		0.422444	1.3402	0.00178608	0.0130087	0.353294	0.207924	0.473484	0.278336
ENSG00000138604	GLCE	0.421848	1.33964	9.61139e-05	0.00146512	36.1351	16.4781	48.4081	38.8588
ENSG00000185482	STAC3	0.421408	1.33923	0.000665466	0.00628722	4.23894	2.15768	5.67693	3.9241
ENSG00000181026	AEN	0.421345	1.33918	5.31714e-07	2.90356e-05	24.7017	9.69876	33.0799	13.4152
ENSG00000140379	BCL2A1	0.421265	1.3391	0.0119256	0.0516925	9.20863	7.74472	12.3313	13.1719
ENSG00000122694	GLIPR2	0.421007	1.33886	0.00229175	0.0157092	31.7234	21.1858	42.4733	34.0968
ENSG00000162066	AMDHD2	0.420905	1.33877	4.94455e-05	0.0008986	12.836	6.4992	17.1844	7.78924
ENSG00000185215	TNFAIP2	0.420554	1.33844	0.0158604	0.0636254	135.338	173.099	181.142	151.644
ENSG00000127564	PKMYT1	0.419161	1.33715	0.0138614	0.058055	10.944	9.94015	14.6338	11.6655
ENSG00000070961	ATP2B1	0.418819	1.33683	0.00133491	0.0104999	45.5543	31.6259	60.8985	61.4102
ENSG00000072110	ACTN1	0.418592	1.33662	0.000101433	0.00152523	179.095	87.9326	239.382	140.769
ENSG00000113555	PCDH12	0.418382	1.33643	0.00102573	0.00868922	17.4144	12.2579	23.2731	14.3549
ENSG00000135114	OASL	0.418217	1.33628	0.0334666	0.107381	13.6087	14.2379	18.1849	19.41
ENSG00000105388	CEACAM5	0.417915	1.336	0.246028	0.422625	570.208	886.343	761.795	1137.42
ENSG00000122034	GTF3A	0.417914	1.33599	0.000855097	0.00755943	94.1131	53.0279	125.735	196.734
ENSG00000169744	LDB2	0.417847	1.33593	0.00129378	0.0102613	14.2511	8.05351	19.0386	14.1891
ENSG00000072609	CHFR	0.417774	1.33586	1.40473e-07	1.03433e-05	30.5943	12.9048	40.8699	13.9002
ENSG00000103222	ABCC1	0.417736	1.33583	5.754e-05	0.000992	80.3314	35.0053	107.309	71.9088
ENSG00000099326	MZF1	0.417672	1.33577	0.000940951	0.00815419	18.3959	11.4493	24.5726	14.1393
ENSG00000146409	SLC18B1	0.416982	1.33513	7.03842e-05	0.00116589	15.6937	7.61285	20.9531	11.2123
ENSG00000163378	EOGT	0.416816	1.33498	1.0313e-06	4.82385e-05	22.3866	8.39087	29.8856	12.9468
ENSG00000157613	CREB3L1	0.416392	1.33459	0.0679557	0.175971	95.3315	136.89	127.228	142.552
ENSG00000130508	PXDN	0.416127	1.33434	0.0172428	0.0672209	126.306	120.95	168.535	146.856
ENSG00000211685	IGLC7	0.415459	1.33372	0.198198	0.366678	9.31868	18.022	12.4285	30.5799
ENSG00000160326	SLC2A6	0.415247	1.33353	0.000936253	0.0081382	8.71844	5.22705	11.6263	6.58641
ENSG00000131748	STARD3	0.415122	1.33341	2.16452e-05	0.000493087	54.4449	17.1472	72.5974	86.2127
ENSG00000159899	NPR2	0.414046	1.33242	7.29678e-05	0.00119652	7.69259	3.59882	10.2497	5.42055
ENSG00000162062	TEDC2	0.413534	1.33194	0.0043271	0.0250305	5.75299	3.85502	7.66266	5.22877
ENSG00000211934	IGHV1-2	0.413359	1.33178	0.170848	0.331895	30.9006	69.6014	41.1529	71.8444
ENSG00000275183	LENG9	0.413088	1.33153	0.000568557	0.00558429	4.80507	2.83443	6.39811	3.84216
ENSG00000063660	GPC1	0.413076	1.33152	0.00800976	0.0391059	55.2131	37.8068	73.5174	74.4929
ENSG00000273142	LINC02604	0.412997	1.33145	0.00666737	0.034246	9.3114	6.55354	12.3977	9.08428
ENSG00000125266	EFNB2	0.412934	1.33139	0.00654181	0.0338547	47.8739	41.0012	63.7389	41.4318
ENSG00000072818	ACAP1	0.412752	1.33122	0.0078072	0.0383944	18.0952	14.2011	24.0887	18.8982
ENSG00000196843	ARID5A	0.41274	1.33121	1.79857e-05	0.000424991	23.3205	10.3043	31.0446	13.9694
ENSG00000162618	ADGRL4	0.412411	1.33091	0.000800097	0.00725298	15.3611	8.91585	20.4442	13.7918
ENSG00000166562	SEC11C	0.412177	1.33069	0.0487758	0.139313	106.523	117.173	141.749	362.91
ENSG00000178718	RPP25	0.412016	1.33054	0.000377332	0.00406656	14.4683	8.5403	19.2507	11.1455
ENSG00000176619	LMNB2	0.410841	1.32946	0.000642788	0.00612877	71.3655	42.9098	94.8776	59.9965
ENSG00000069399	BCL3	0.410823	1.32944	0.00106982	0.00900215	77.6642	55.4177	103.25	60.754
ENSG00000087128	TMPRSS11E	0.410301	1.32896	0.308186	0.491659	11.0138	19.9571	14.6369	31.2927
ENSG00000151689	INPP1	0.410028	1.32871	1.75711e-05	0.00041904	16.0092	6.51786	21.2716	11.2402
ENSG00000151914	DST	0.409827	1.32853	0.0181977	0.0696014	112.636	86.2256	149.639	159.845
ENSG00000144589	STK11IP	0.409622	1.32834	4.84895e-07	2.67348e-05	20.9391	8.44848	27.8142	9.57889
ENSG00000213398	LCAT	0.409486	1.32821	0.00762059	0.0377907	6.33974	4.85095	8.42052	7.58484
ENSG00000167962	ZNF598	0.409401	1.32813	1.27911e-05	0.000328057	38.5453	16.4197	51.1934	22.1861
ENSG00000243679	AC018638.5	0.409038	1.3278	0.00770259	0.0380232	7.46021	6.18505	9.90566	6.92805
ENSG00000265982	AC103810.3	0.409013	1.32778	0.0662851	0.172907	0.563114	0.647424	0.74769	0.716239
ENSG00000249007	AL691482.4	0.408402	1.32721	0.0612929	0.163538	3.48354	3.72175	4.62341	4.60981
ENSG00000174442	ZWILCH	0.407884	1.32674	4.70745e-05	0.000873596	14.4515	6.85982	19.1734	11.331
ENSG00000112208	BAG2	0.407449	1.32634	0.0145648	0.0599215	15.9006	13.326	21.0896	18.6188
ENSG00000176845	METRNL	0.407413	1.32631	0.000416891	0.00439333	29.9492	16.0893	39.7217	19.2453
ENSG00000167703	SLC43A2	0.407346	1.32624	3.85935e-05	0.000771396	53.2124	24.1227	70.5726	35.5694
ENSG00000183688	RFLNB	0.407263	1.32617	0.00336069	0.0207103	17.4231	19.6399	23.106	15.0809
ENSG00000179776	CDH5	0.406959	1.32589	0.00350774	0.021397	42.1157	32.5249	55.8407	43.2094
ENSG00000198467	TPM2	0.406795	1.32574	0.00688339	0.0350775	99.5722	90.8637	132.007	104.941
ENSG00000120279	MYCT1	0.406711	1.32566	0.00138224	0.0107243	7.24494	4.27817	9.60433	6.85786
ENSG00000198053	SIRPA	0.406383	1.32536	0.00164724	0.012206	50.8141	35.1926	67.347	42.5855
ENSG00000064932	SBNO2	0.406077	1.32508	0.000288447	0.00335923	111.805	63.8306	148.151	75.137
ENSG00000185033	SEMA4B	0.405454	1.32451	0.00635181	0.0330567	187.445	230.03	248.272	209.932
ENSG00000071054	MAP4K4	0.40537	1.32443	0.000214585	0.00267657	120.312	65.613	159.345	93.5205
ENSG00000100359	SGSM3	0.404787	1.32389	1.93579e-05	0.000448865	61.6211	27.9922	81.5797	38.4167
ENSG00000111321	LTBR	0.404773	1.32388	6.08871e-05	0.00103255	132.165	64.4395	174.97	88.2161
ENSG00000105122	RASAL3	0.404384	1.32352	0.00801443	0.0391059	14.8224	11.4705	19.6178	15.0448
ENSG00000077232	DNAJC10	0.40359	1.3228	5.58917e-06	0.000181736	137.835	56.3669	182.328	88.9475
ENSG00000185561	TLCD2	0.402756	1.32203	0.00150107	0.0114059	13.3568	7.89769	17.6581	12.8503
ENSG00000073169	SELENOO	0.402178	1.3215	5.61141e-05	0.000978423	18.1951	9.40752	24.0448	10.2816
ENSG00000065882	TBC1D1	0.402088	1.32142	0.000326152	0.00365303	36.0728	19.1829	47.6673	28.6595
ENSG00000101057	MYBL2	0.402072	1.3214	0.0777017	0.193327	49.4302	61.8498	65.3173	68.2374
ENSG00000102575	ACP5	0.401727	1.32109	0.00548802	0.0298119	106.07	57.6002	140.128	150.146
ENSG00000275993	SIK1B	0.401359	1.32075	0.0747258	0.188474	19.9272	24.2862	26.3189	34.184
ENSG00000159674	SPON2	0.401275	1.32067	0.0299633	0.0990361	42.4836	43.8241	56.107	53.0579
ENSG00000182718	ANXA2	0.400965	1.32039	0.000498378	0.0050515	782.571	406.358	1033.3	581.615
ENSG00000125772	GPCPD1	0.400684	1.32013	0.00382721	0.0227737	86.7195	64.5122	114.481	92.3918
ENSG00000134013	LOXL2	0.400666	1.32012	0.0488632	0.139436	55.4662	124.614	73.2219	70.189
ENSG00000173581	CCDC106	0.400575	1.32003	1.91279e-05	0.000446387	10.9565	4.66302	14.4629	6.7508
ENSG00000079819	EPB41L2	0.400447	1.31992	0.00115104	0.00943059	38.4974	23.8742	50.8134	30.1617
ENSG00000101255	TRIB3	0.400191	1.31968	0.00361813	0.0218751	32.0303	21.0553	42.2699	34.0742
ENSG00000183036	PCP4	0.399967	1.31948	0.373627	0.557412	20.3523	38.654	26.8544	126.675
ENSG00000086619	ERO1B	0.399821	1.31934	0.0798917	0.196552	29.5609	36.588	39.001	70.9259
ENSG00000129465	RIPK3	0.399797	1.31932	0.000278625	0.00327155	11.9612	5.18917	15.7806	8.90671
ENSG00000178999	AURKB	0.399715	1.31925	0.0402331	0.122155	13.4375	13.2988	17.7274	17.6465
ENSG00000136026	CKAP4	0.399534	1.31908	4.24362e-05	0.000818654	135.517	63.0906	178.758	84.2716
ENSG00000100241	SBF1	0.399392	1.31895	2.77945e-05	0.000597398	81.9098	38.0751	108.035	37.8156
ENSG00000175416	CLTB	0.398677	1.3183	0.000294604	0.00339971	59.7146	28.1835	78.7216	53.1415
ENSG00000235568	NFAM1	0.398192	1.31786	0.00895979	0.0421509	14.3643	9.0926	18.93	15.9411
ENSG00000128165	ADM2	0.397512	1.31723	0.0120884	0.0521806	15.3291	12.245	20.1921	13.2389
ENSG00000269386	RAB11B-AS1	0.396715	1.31651	0.000486055	0.00495912	2.49324	1.53064	3.28237	2.10764
ENSG00000105137	SYDE1	0.396487	1.3163	0.000735297	0.0068006	11.1481	6.91935	14.6743	9.33776
ENSG00000182606	TRAK1	0.396398	1.31622	5.70019e-06	0.000183775	72.6952	23.5292	95.6828	54.9775
ENSG00000188677	PARVB	0.395981	1.31584	0.000178271	0.00235167	21.3852	10.7911	28.1394	13.5254
ENSG00000136159	NUDT15	0.395961	1.31582	1.5803e-05	0.000386253	19.1754	7.47192	25.2314	13.9941
ENSG00000198853	RUSC2	0.395516	1.31541	9.61963e-06	0.000267267	20.1923	8.37016	26.5612	10.8996
ENSG00000211670	IGLV3-9	0.395217	1.31514	0.193543	0.361051	13.3367	25.7042	17.5396	29.0968
ENSG00000125755	SYMPK	0.394035	1.31406	6.03958e-06	0.000189367	94.7263	33.8643	124.476	80.4791
ENSG00000022556	NLRP2	0.393727	1.31378	0.236091	0.410935	25.1395	29.7272	33.0278	61.8778
ENSG00000111581	NUP107	0.39335	1.31344	0.00195885	0.0139188	47.5369	27.2398	62.4368	96.5966
ENSG00000108784	NAGLU	0.392996	1.31312	3.72948e-06	0.000131779	42.8789	15.234	56.305	27.2395
ENSG00000132357	CARD6	0.392884	1.31302	0.00168185	0.0123838	16.3366	10.1301	21.4503	13.5023
ENSG00000074181	NOTCH3	0.39288	1.31301	0.00326899	0.0203097	185.924	104.077	244.121	168.036
ENSG00000167851	CD300A	0.392852	1.31299	0.00569533	0.030603	14.8932	13.0529	19.5545	15.0662
ENSG00000269958	AL049840.6	0.392578	1.31274	0.000249545	0.00300111	6.69859	3.03622	8.79349	4.56872
ENSG00000118503	TNFAIP3	0.392151	1.31235	0.00306704	0.0194098	53.1528	34.3341	69.755	46.1733
ENSG00000109099	PMP22	0.391975	1.31219	0.00126597	0.0101056	67.2808	39.7039	88.2851	54.9044
ENSG00000105355	PLIN3	0.391856	1.31208	3.14233e-05	0.000650535	72.9574	34.6775	95.726	45.2862
ENSG00000174004	NRROS	0.391777	1.31201	0.00243789	0.0164345	8.01878	4.82553	10.5207	7.65443
ENSG00000245532	NEAT1	0.391401	1.31167	0.0557992	0.153218	737.961	887.545	967.959	1061.63
ENSG00000129038	LOXL1	0.391359	1.31163	0.00732032	0.03674	25.4266	18.3185	33.3503	25.7455
ENSG00000141994	DUS3L	0.391164	1.31145	1.27228e-05	0.00032704	17.4698	6.72981	22.9108	11.7347
ENSG00000135451	TROAP	0.391127	1.31142	0.0542441	0.150593	13.4178	14.7132	17.5963	16.6581
ENSG00000132205	EMILIN2	0.391082	1.31138	0.0016537	0.0122184	28.0039	18.8896	36.7237	24.3414
ENSG00000163359	COL6A3	0.390964	1.31127	0.0182317	0.0696895	673.748	626.981	883.465	758.4
ENSG00000167460	TPM4	0.390904	1.31122	1.94011e-05	0.000448865	400.742	161.93	525.459	255.05
ENSG00000166965	RCCD1	0.390901	1.31121	2.80459e-05	0.00060054	11.8473	5.51924	15.5343	7.3979
ENSG00000254709	IGLL5	0.390373	1.31073	0.117231	0.258442	104.328	127.725	136.746	186.793
ENSG00000181218	H2AW	0.390183	1.31056	0.196969	0.364818	7.66222	19.6001	10.0418	22.0183
ENSG00000007392	LUC7L	0.390002	1.31039	0.000232606	0.00285762	39.6718	17.2484	51.9858	28.6415
ENSG00000164694	FNDC1	0.389526	1.30996	0.127912	0.273608	36.5284	84.2639	47.8509	61.6425
ENSG00000051523	CYBA	0.388987	1.30947	0.00317354	0.0198948	141.185	100.188	184.878	120.098
ENSG00000204103	MAFB	0.388743	1.30925	0.00502249	0.0279755	40.3962	30.3152	52.8888	34.0712
ENSG00000211662	IGLV3-21	0.388693	1.30921	0.183165	0.34783	138.19	303.581	180.919	288.265
ENSG00000100055	CYTH4	0.388223	1.30878	0.00344028	0.021087	21.5326	14.4984	28.1814	18.9394
ENSG00000079257	LXN	0.388058	1.30863	0.000748495	0.0069003	15.6341	9.5233	20.4593	11.9511
ENSG00000264577	AC010761.1	0.388	1.30858	0.00191439	0.0136641	1.731	1.14505	2.26515	1.24766
ENSG00000153071	DAB2	0.387788	1.30839	0.00296364	0.0189384	63.7058	42.6148	83.3518	56.5357
ENSG00000102554	KLF5	0.387427	1.30806	0.00310764	0.0196061	107.206	65.7709	140.231	95.1842
ENSG00000211679	IGLC3	0.387283	1.30793	0.120813	0.263472	197.684	243.381	258.557	355.52
ENSG00000142330	CAPN10	0.386901	1.30758	0.000196939	0.00253115	20.7062	10.1611	27.0751	12.9026
ENSG00000115738	ID2	0.386466	1.30719	0.007303	0.0367001	43.5002	30.9475	56.863	58.7886
ENSG00000013016	EHD3	0.386369	1.3071	0.000503898	0.00508854	13.6019	7.03905	17.7791	11.1025
ENSG00000167747	C19orf48	0.386276	1.30701	0.00130703	0.0103448	43.0476	26.7508	56.2638	38.9486
ENSG00000168078	PBK	0.386004	1.30677	0.0740588	0.187303	9.63744	13.6452	12.5939	13.5937
ENSG00000103326	CAPN15	0.38549	1.3063	0.000145321	0.00202509	48.8865	20.3013	63.8606	32.7343
ENSG00000272645	GTF2IP20	0.385473	1.30629	0.0161868	0.0645161	5.5955	3.59165	7.30933	6.37253
ENSG00000267523	AC008735.2	0.384961	1.30582	0.0182741	0.0697765	1.43093	1.06917	1.86854	1.24127
ENSG00000100300	TSPO	0.384812	1.30569	0.0015229	0.0115334	99.7856	58.7874	130.289	72.4333
ENSG00000176915	ANKLE2	0.384794	1.30567	5.90481e-06	0.000186165	82.6816	33.1944	107.955	45.8854
ENSG00000187531	SIRT7	0.384704	1.30559	9.50328e-06	0.000265186	30.0891	12.4116	39.2841	15.8311
ENSG00000188493	C19orf54	0.384551	1.30545	1.40582e-05	0.000352629	15.3878	6.43493	20.088	9.4249
ENSG00000069424	KCNAB2	0.384415	1.30533	0.00274828	0.0179043	33.2569	17.6592	43.4113	35.2161
ENSG00000132963	POMP	0.383958	1.30492	0.000113282	0.00166824	76.5732	29.9488	99.9216	106.259
ENSG00000100060	MFNG	0.38383	1.3048	0.000490188	0.0049862	15.1331	7.81149	19.7457	10.6898
ENSG00000133056	PIK3C2B	0.383785	1.30476	0.00228699	0.0156894	35.9191	26.7366	46.8658	25.1274
ENSG00000109805	NCAPG	0.383523	1.30452	0.0470787	0.135753	14.5729	14.8884	19.0106	18.6185
ENSG00000133874	RNF122	0.383292	1.30431	8.95027e-05	0.00139548	9.03686	3.67931	11.7869	7.41144
ENSG00000167306	MYO5B	0.382818	1.30389	0.00201302	0.0142258	47.3171	26.3654	61.6962	37.2064
ENSG00000065911	MTHFD2	0.382713	1.30379	0.00383834	0.0228161	78.1858	50.2849	101.938	82.0365
ENSG00000231106	LINC01436	0.382684	1.30377	0.319647	0.502843	9.18147	24.5311	11.9705	26.4821
ENSG00000100364	KIAA0930	0.382561	1.30365	1.74337e-05	0.000417129	83.4064	36.1964	108.733	50.4682
ENSG00000134871	COL4A2	0.382378	1.30349	0.0159844	0.0638535	458.469	592.215	597.61	404.98
ENSG00000188486	H2AX	0.382343	1.30346	0.000559215	0.00552582	39.8594	20.148	51.955	30.63
ENSG00000173442	EHBP1L1	0.38228	1.3034	0.000110499	0.00163358	87.3515	41.2509	113.854	46.3788
ENSG00000066336	SPI1	0.38228	1.3034	0.0107963	0.0482264	37.2392	23.2685	48.5376	42.0167
ENSG00000165092	ALDH1A1	0.382006	1.30315	0.100922	0.232283	94.9631	174.688	123.751	147.77
ENSG00000103855	CD276	0.381792	1.30296	5.79932e-06	0.000184882	90.3829	32.3096	117.765	55.6065
ENSG00000158089	GALNT14	0.381659	1.30284	0.131274	0.278378	18.0044	23.5722	23.4569	23.9368
ENSG00000133119	RFC3	0.38148	1.30268	0.00320694	0.0200443	13.7333	9.46385	17.8901	16.9001
ENSG00000110697	PITPNM1	0.381342	1.30255	0.000174209	0.00231797	63.5109	32.3349	82.7263	39.5029
ENSG00000241878	PISD	0.381265	1.30248	1.75383e-09	4.08499e-07	28.4025	8.57556	36.9938	10.6243
ENSG00000138629	UBL7	0.381102	1.30234	1.13954e-05	0.000300589	34.9452	11.2331	45.5105	42.4842
ENSG00000130208	APOC1	0.381005	1.30225	0.0739723	0.187214	98.0002	109.554	127.621	257.239
ENSG00000160209	PDXK	0.380645	1.30192	1.01423e-05	0.000280277	148.134	55.4506	192.859	87.7507
ENSG00000158863	FAM160B2	0.380558	1.30185	0.000152029	0.00209553	50.5541	24.6729	65.8137	30.3995
ENSG00000186185	KIF18B	0.380312	1.30162	0.065008	0.170796	12.4937	14.6602	16.2621	14.4388
ENSG00000125733	TRIP10	0.380207	1.30153	6.78198e-06	0.000203157	55.1504	19.8222	71.7799	30.7804
ENSG00000277978	AC010542.6	0.379999	1.30134	0.0201574	0.0748881	1.06964	0.678465	1.39196	1.20435
ENSG00000182372	CLN8	0.37993	1.30128	4.35023e-05	0.000827486	17.8039	8.25349	23.1679	10.5513
ENSG00000228278	ORM2	0.379403	1.3008	0.290038	0.47127	5.31586	13.5905	6.91489	22.246
ENSG00000269352	PTOV1-AS2	0.379007	1.30045	0.0164181	0.0651757	2.89074	2.41556	3.75925	2.45784
ENSG00000181031	RPH3AL	0.378602	1.30008	0.00914788	0.0428713	28.1228	18.8243	36.562	29.2147
ENSG00000062524	LTK	0.378405	1.2999	0.146924	0.300245	10.9712	15.5581	14.2615	17.9807
ENSG00000186827	TNFRSF4	0.3784	1.2999	0.00673255	0.0345032	5.02395	3.99648	6.53063	3.84042
ENSG00000101412	E2F1	0.378374	1.29988	0.0159699	0.0638335	21.3953	16.701	27.8113	23.6138
ENSG00000244575	IGKV1-27	0.378371	1.29987	0.175782	0.337631	19.6631	44.1591	25.5595	51.3133
ENSG00000164733	CTSB	0.378355	1.29986	0.000776051	0.0071027	1311.37	735.968	1704.59	1006.9
ENSG00000164855	TMEM184A	0.378258	1.29977	0.0162308	0.064567	39.8375	30.0484	51.7797	40.016
ENSG00000140525	FANCI	0.378059	1.29959	0.00415105	0.0242208	27.575	17.6319	35.8363	24.0656
ENSG00000020181	ADGRA2	0.378006	1.29954	0.00587624	0.031266	26.1133	17.7076	33.9354	22.4615
ENSG00000269867	AC010326.3	0.377763	1.29933	0.00140562	0.0108248	3.01165	1.62105	3.91312	2.41843
ENSG00000103196	CRISPLD2	0.377621	1.2992	0.00596048	0.0315232	52.8313	39.9084	68.6384	44.5798
ENSG00000214530	STARD10	0.377459	1.29905	0.00891491	0.0419744	112.833	73.6687	146.576	139.735
ENSG00000241852	C8orf58	0.3773	1.29891	5.72936e-06	0.000184195	6.54152	2.61187	8.49684	3.18662
ENSG00000270804	AC010326.4	0.376655	1.29833	0.0031858	0.0199339	2.69041	1.5659	3.49304	2.57418
ENSG00000188747	NOXA1	0.376569	1.29825	0.0279076	0.0943451	13.9739	11.9935	18.1416	15.628
ENSG00000123329	ARHGAP9	0.376429	1.29812	0.0110115	0.0489385	15.4944	10.5546	20.1136	14.6771
ENSG00000166803	PCLAF	0.375709	1.29748	0.0193757	0.0729577	16.3702	12.5458	21.24	18.8418
ENSG00000120075	HOXB5	0.375622	1.2974	0.0989245	0.22915	5.60032	15.877	7.26585	9.75041
ENSG00000187961	KLHL17	0.375509	1.2973	0.00588811	0.0312999	9.39689	7.18239	12.1906	6.98751
ENSG00000253755	IGHGP	0.375428	1.29722	0.133823	0.282054	74.0927	100.606	96.1149	105.457
ENSG00000134030	CTIF	0.375332	1.29714	0.000919291	0.00802744	26.4101	11.5585	34.2576	38.9094
ENSG00000108691	CCL2	0.375025	1.29686	0.0235892	0.0840859	42.1377	38.2057	54.6468	47.956
ENSG00000218426	AL590867.2	0.374988	1.29683	0.0153014	0.0619714	5.82685	4.27053	7.55642	9.35029
ENSG00000173894	CBX2	0.374872	1.29672	0.0764673	0.191302	16.5432	21.651	21.452	23.6562
ENSG00000265107	GJA5	0.374551	1.29644	0.0139962	0.0584269	25.0936	20.8134	32.5322	27.0416
ENSG00000105374	NKG7	0.374279	1.29619	0.0642742	0.169336	10.8086	11.4484	14.0101	17.36
ENSG00000139631	CSAD	0.374131	1.29606	0.0195715	0.0733678	15.6483	10.8488	20.2811	15.6305
ENSG00000211673	IGLV3-1	0.37319	1.29521	0.188082	0.353928	49.8787	74.41	64.6035	114.535
ENSG00000074356	NCBP3	0.373131	1.29516	7.52747e-06	0.000218603	43.9538	15.266	56.9273	26.0282
ENSG00000120889	TNFRSF10B	0.37305	1.29509	0.000726943	0.0067452	89.0492	46.0645	115.327	61.097
ENSG00000186166	CCDC84	0.372614	1.2947	0.0066029	0.0340221	22.3877	13.7645	28.9853	18.9938
ENSG00000124216	SNAI1	0.372342	1.29445	0.0267177	0.0918675	5.31835	6.10946	6.88435	4.6166
ENSG00000244701	AC004918.1	0.372332	1.29444	0.0067308	0.0345032	1.7965	1.15788	2.32546	1.66393
ENSG00000166780	BMERB1	0.372161	1.29429	0.0211129	0.0776544	10.1021	11.5197	13.0751	11.6194
ENSG00000128944	KNSTRN	0.371963	1.29411	0.00303815	0.0192927	14.6899	8.42434	19.0104	14.2432
ENSG00000112096	SOD2	0.371847	1.29401	0.000819031	0.00734608	380.008	242.419	491.734	288.061
ENSG00000272849	AC084018.1	0.371704	1.29388	0.0482189	0.138098	1.29445	1.2696	1.67486	1.31446
ENSG00000148841	ITPRIP	0.371641	1.29382	0.00122839	0.00990782	30.4808	18.6884	39.4368	22.3149
ENSG00000110719	TCIRG1	0.37152	1.29371	0.00161998	0.0120921	118.134	72.2978	152.832	81.1539
ENSG00000140400	MAN2C1	0.371114	1.29335	0.000535781	0.00534516	45.82	24.4044	59.2613	28.6516
ENSG00000138613	APH1B	0.370977	1.29323	0.000507782	0.00511465	13.5338	6.95068	17.5023	8.58721
ENSG00000211895	IGHA1	0.370827	1.29309	0.116858	0.257834	2635.9	3446.78	3408.46	4197
ENSG00000171848	RRM2	0.37042	1.29273	0.0495353	0.140598	51.9415	55.9971	67.1462	55.9993
ENSG00000126785	RHOJ	0.37031	1.29263	0.00198153	0.0140293	9.98887	6.11962	12.9119	7.85866
ENSG00000173209	AHSA2P	0.370185	1.29252	0.0176214	0.0681191	37.3632	28.4959	48.2926	32.4993
ENSG00000115828	QPCT	0.370163	1.2925	0.20201	0.370356	44.6785	92.9452	57.7469	104.11
ENSG00000101000	PROCR	0.370154	1.29249	0.0141267	0.0587779	19.9088	15.7872	25.732	31.1329
ENSG00000100416	TRMU	0.370073	1.29242	5.6083e-05	0.000978423	22.4387	12.0067	29.0002	10.7569
ENSG00000104731	KLHDC4	0.369911	1.29227	0.00026539	0.00315435	28.6209	13.8041	36.9861	21.3915
ENSG00000165304	MELK	0.369759	1.29214	0.0548069	0.1516	14.881	13.282	19.2283	18.2659
ENSG00000100401	RANGAP1	0.369748	1.29213	6.57349e-06	0.00019795	93.5548	39.3369	120.885	44.6226
ENSG00000162616	DNAJB4	0.369683	1.29207	0.00544043	0.0296097	15.3558	13.8767	19.8407	13.5739
ENSG00000075426	FOSL2	0.369186	1.29162	0.00137206	0.0106744	166.637	94.5747	215.232	109.924
ENSG00000136235	GPNMB	0.369087	1.29154	0.0322134	0.104565	257.548	210.475	332.633	371.071
ENSG00000179820	MYADM	0.368974	1.29143	0.000969276	0.00832381	123.337	62.2294	159.282	88.4154
ENSG00000148339	SLC25A25	0.36879	1.29127	0.000508194	0.00511465	21.2882	9.88253	27.4888	18.5303
ENSG00000184363	PKP3	0.368378	1.2909	0.00135796	0.0106372	76.523	39.1529	98.7835	56.3966
ENSG00000152229	PSTPIP2	0.368143	1.29069	0.00184238	0.0133032	13.2775	7.1738	17.1372	9.19646
ENSG00000179979		0.368079	1.29063	0.0240111	0.0849996	12.5778	11.9815	16.2334	12.8431
ENSG00000244119	PDCL3P4	0.36799	1.29055	0.0645037	0.169784	1.85406	2.21212	2.39276	2.67951
ENSG00000128626	MRPS12	0.36765	1.29025	0.00287117	0.0184717	31.919	22.5198	41.1834	46.1852
ENSG00000136379	ABHD17C	0.367098	1.28976	0.0167435	0.0659171	54.9574	40.0802	70.8817	56.0503
ENSG00000090674	MCOLN1	0.367073	1.28973	2.74048e-05	0.000594622	24.3979	7.68209	31.4667	18.1076
ENSG00000118939	UCHL3	0.366253	1.289	5.47755e-05	0.000964741	7.32248	3.22788	9.43868	4.27213
ENSG00000157873	TNFRSF14	0.365459	1.28829	0.00400005	0.023571	63.8284	41.7418	82.2295	50.867
ENSG00000118971	CCND2	0.365193	1.28805	0.0106399	0.0476771	36.4946	27.1413	47.007	42.1419
ENSG00000138964	PARVG	0.364583	1.28751	0.0108501	0.0483114	19.5395	11.5281	25.1572	20.5111
ENSG00000215252	GOLGA8B	0.364231	1.2872	0.0662487	0.172907	21.9561	18.4343	28.2617	24.1675
ENSG00000162694	EXTL2	0.363713	1.28673	0.000426042	0.00445074	12.3044	6.60478	15.8325	9.44961
ENSG00000099958	DERL3	0.363553	1.28659	0.0365458	0.114055	33.6368	31.271	43.2768	37.2798
ENSG00000227719	AC006042.1	0.363327	1.28639	0.0411452	0.124098	1.90298	1.38296	2.44797	1.96671
ENSG00000164294	GPX8	0.363322	1.28639	0.0185841	0.0706532	27.534	25.1015	35.4194	26.6081
ENSG00000211640	IGLV6-57	0.363122	1.28621	0.196186	0.364015	47.8644	60.5034	61.5635	108.543
ENSG00000167601	AXL	0.362301	1.28547	0.010124	0.045924	52.4891	34.1751	67.4734	67.6646
ENSG00000013810	TACC3	0.362281	1.28546	0.00668129	0.0342867	48.8017	36.2182	62.7325	49.4031
ENSG00000100151	PICK1	0.362242	1.28542	2.55603e-05	0.000564296	26.0818	11.6766	33.5262	14.2439
ENSG00000243063	IGKV3-7	0.361985	1.28519	0.171363	0.332329	2.92297	4.0908	3.75659	5.4391
ENSG00000177192	PUS1	0.361981	1.28519	0.000425354	0.00445074	22.7048	13.0369	29.1799	13.2094
ENSG00000198826	ARHGAP11A	0.361681	1.28492	0.0281255	0.0948286	16.3999	17.6958	21.0726	18.6637
ENSG00000138092	CENPO	0.361646	1.28489	0.00197631	0.014001	12.2655	7.51107	15.7598	10.2237
ENSG00000186635	ARAP1	0.361637	1.28488	2.62671e-05	0.000572112	129.064	46.1964	165.832	74.257
ENSG00000091972	CD200	0.361601	1.28485	0.00373786	0.0223352	8.75334	5.53736	11.2467	6.51347
ENSG00000187498	COL4A1	0.36145	1.28472	0.0201471	0.0748789	433.509	455.618	556.936	419.763
ENSG00000101199	ARFGAP1	0.361402	1.28467	0.000173124	0.00231318	97.8024	54.1389	125.644	58.6759
ENSG00000173372	C1QA	0.360463	1.28384	0.0305138	0.100419	181.892	138.323	233.52	176.958
ENSG00000124813	RUNX2	0.360452	1.28383	0.00813281	0.0394139	17.3461	10.3573	22.2693	17.8191
ENSG00000153391	INO80C	0.360106	1.28352	7.38009e-05	0.00120499	11.2697	6.09449	14.4649	9.20035
ENSG00000139546	TARBP2	0.360065	1.28348	4.03633e-05	0.000798381	27.7497	12.215	35.6163	17.4556
ENSG00000025434	NR1H3	0.360024	1.28345	0.00141511	0.0108759	29.9245	14.6258	38.4065	31.9123
ENSG00000182199	SHMT2	0.359959	1.28339	0.00248678	0.0166414	107.84	72.3236	138.4	111.972
ENSG00000187479	C11orf96	0.359874	1.28331	0.0413764	0.12453	28.2382	29.3274	36.2385	38.7153
ENSG00000173917	HOXB2	0.359687	1.28315	0.171373	0.332329	12.3365	29.7215	15.8295	29.9704
ENSG00000156510	HKDC1	0.359539	1.28302	0.0892066	0.212151	22.7284	21.3586	29.1609	26.8614
ENSG00000089159	PXN	0.35951	1.28299	8.87051e-05	0.00138684	116.871	57.5488	149.944	67.977
ENSG00000012779	ALOX5	0.359319	1.28282	0.0179856	0.0691608	46.3917	32.596	59.5123	51.6257
ENSG00000092621	PHGDH	0.359288	1.28279	0.143107	0.29467	29.7606	49.4371	38.1767	39.8611
ENSG00000106565	TMEM176B	0.35908	1.28261	0.0294078	0.0978143	121.787	130.969	156.205	140.428
ENSG00000105619	TFPT	0.358718	1.28229	5.04896e-05	0.000910327	12.8862	6.17031	16.5238	6.13243
ENSG00000125912	NCLN	0.358649	1.28222	8.04335e-06	0.000229497	81.9337	34.8172	105.057	35.0555
ENSG00000108960	MMD	0.358433	1.28203	0.0133975	0.0564852	27.6287	21.6079	35.4209	24.1827
ENSG00000255135	AP002360.2	0.358377	1.28198	0.0119649	0.051774	2.39871	1.65769	3.0751	3.40425
ENSG00000179104	TMTC2	0.358371	1.28198	0.00221569	0.0153666	24.3195	11.9293	31.1771	22.2634
ENSG00000135604	STX11	0.357984	1.28163	0.00806213	0.039238	5.92269	3.38875	7.59072	5.99339
ENSG00000197496	SLC2A10	0.357865	1.28153	0.0677493	0.175732	27.7386	27.5689	35.5478	30.7973
ENSG00000077782	FGFR1	0.357541	1.28124	0.0260683	0.0903212	56.7179	51.6158	72.6692	88.3542
ENSG00000139180	NDUFA9	0.357537	1.28124	0.000129957	0.00185557	33.2018	16.2457	42.5394	24.3909
ENSG00000117318	ID3	0.357522	1.28122	0.0157085	0.0631403	41.2317	48.6744	52.827	35.4778
ENSG00000107262	BAG1	0.357446	1.28116	0.00303936	0.0192927	84.8746	42.001	108.738	86.9483
ENSG00000130775	THEMIS2	0.35744	1.28115	0.00358884	0.0217292	42.5168	21.1005	54.4704	35.2628
ENSG00000243811	APOBEC3D	0.357393	1.28111	0.0100637	0.0457597	5.91999	3.39185	7.58415	5.18489
ENSG00000164825	DEFB1	0.357338	1.28106	0.363907	0.547396	6.99857	39.1957	8.96559	16.2462
ENSG00000164465	DCBLD1	0.357298	1.28102	0.0128593	0.0547012	32.8479	20.8484	42.079	77.1309
ENSG00000185088	RPS27L	0.357226	1.28096	0.00093897	0.00814321	48.4677	25.1401	62.0852	39.7558
ENSG00000241294	IGKV2-24	0.357214	1.28095	0.185938	0.351517	13.0106	17.3742	16.6659	27.0178
ENSG00000139194	RBP5	0.357207	1.28094	0.00848901	0.0404869	4.71663	3.25763	6.04173	4.98501
ENSG00000166265	CYYR1	0.356805	1.28059	0.00372205	0.0222874	11.3539	5.83534	14.5397	9.75469
ENSG00000260563	AC132872.1	0.35634	1.28017	0.0150934	0.061456	3.38723	3.09651	4.33624	2.78483
ENSG00000240771	ARHGEF25	0.355555	1.27948	0.00341564	0.0210036	9.13106	6.03687	11.683	6.73708
ENSG00000169583	CLIC3	0.355547	1.27947	0.0961238	0.224261	15.5266	15.8355	19.8658	22.9426
ENSG00000105357	MYH14	0.355471	1.2794	0.0119209	0.0516925	195.794	118.031	250.499	189.981
ENSG00000130300	PLVAP	0.355394	1.27933	0.00770216	0.0380232	80.658	49.7746	103.189	73.9016
ENSG00000167613	LAIR1	0.355314	1.27926	0.0195687	0.0733678	37.0368	25.5012	47.3798	38.3702
ENSG00000163482	STK36	0.35525	1.27921	0.00102089	0.00866506	25.1247	13.2879	32.1397	16.2136
ENSG00000088325	TPX2	0.355099	1.27907	0.0838929	0.203241	55.2514	64.788	70.6705	76.7037
ENSG00000142694	EVA1B	0.35494	1.27893	0.00507883	0.0281655	10.4495	8.29654	13.3642	7.45456
ENSG00000100034	PPM1F	0.35471	1.27873	6.23983e-05	0.00105192	27.9894	14.0586	35.7909	14.042
ENSG00000141503	MINK1	0.354553	1.27859	2.81468e-05	0.000601572	89.6481	32.5524	114.623	49.8571
ENSG00000079462	PAFAH1B3	0.354238	1.27831	0.00500605	0.0278975	35.6102	19.3585	45.5209	35.2113
ENSG00000227507	LTB	0.354205	1.27828	0.0520935	0.146115	16.5947	13.2381	21.2127	23.7048
ENSG00000008323	PLEKHG6	0.35408	1.27817	0.0323004	0.104818	10.9322	7.16552	13.9732	12.5435
ENSG00000127334	DYRK2	0.354059	1.27815	0.00615692	0.0322631	41.4489	23.5467	52.978	75.2002
ENSG00000126264	HCST	0.354003	1.2781	0.0221385	0.0803392	5.43059	4.01538	6.94085	6.81984
ENSG00000118946	PCDH17	0.353848	1.27796	0.00999499	0.045538	19.2335	13.2982	24.5798	15.117
ENSG00000187840	EIF4EBP1	0.353711	1.27784	0.0351793	0.111074	39.4062	47.7524	50.3549	43.6752
ENSG00000147443	DOK2	0.352242	1.27654	0.0214295	0.0785907	15.6421	10.5075	19.9678	16.6954
ENSG00000122786	CALD1	0.352206	1.27651	0.00566346	0.030478	170.837	98.8102	218.075	167.733
ENSG00000005238	FAM214B	0.351828	1.27618	3.13434e-05	0.000650403	24.3918	10.1155	31.1283	12.9901
ENSG00000228952	LINC02041	0.351317	1.27572	0.224875	0.397353	0.757592	0.808674	0.966478	1.14133
ENSG00000137726	FXYD6	0.351072	1.27551	0.00809038	0.0393252	17.036	14.2979	21.7295	13.2422
ENSG00000076382	SPAG5	0.350994	1.27544	0.0443972	0.130323	31.0951	30.0926	39.6599	38.9365
ENSG00000154978	VOPP1	0.350866	1.27533	0.00375134	0.022392	53.5767	32.6557	68.3278	96.9839
ENSG00000075223	SEMA3C	0.350804	1.27527	0.0405172	0.122845	58.9901	58.1545	75.2284	70.3615
ENSG00000041353	RAB27B	0.350628	1.27512	0.110686	0.247893	54.5978	69.7934	69.6185	72.0648
ENSG00000211649	IGLV7-46	0.35036	1.27488	0.20851	0.378575	10.9928	17.3237	14.0145	21.5495
ENSG00000233223	AC016876.2	0.35018	1.27472	0.00844331	0.040387	3.75475	3.56999	4.78625	2.98956
ENSG00000174059	CD34	0.349855	1.27443	0.00503238	0.0280159	45.6136	26.5153	58.1315	40.346
ENSG00000162458	FBLIM1	0.349575	1.27418	0.0016915	0.0124334	61.3671	31.9913	78.193	42.6946
ENSG00000131873	CHSY1	0.349505	1.27412	0.000414421	0.00437943	44.4116	23.5384	56.5859	26.2777
ENSG00000132530	XAF1	0.349212	1.27386	0.0482159	0.138098	14.4281	12.3964	18.3795	16.9087
ENSG00000175489	LRRC25	0.349107	1.27377	0.0134573	0.0566745	9.31822	6.51208	11.8693	8.70585
ENSG00000174600	CMKLR1	0.349041	1.27371	0.0298005	0.0987267	20.0254	15.3101	25.5067	21.246
ENSG00000211898	IGHD	0.349005	1.27368	0.312433	0.495938	69.2143	135.577	88.157	165.571
ENSG00000099901	RANBP1	0.348958	1.27364	0.000836431	0.00744052	59.2116	31.419	75.4143	58.9914
ENSG00000162745	OLFML2B	0.348866	1.27356	0.0428762	0.127057	33.9842	54.9786	43.2809	34.0589
ENSG00000241990	PRR34-AS1	0.348838	1.27353	0.013235	0.0559241	3.31389	2.34432	4.22035	3.19869
ENSG00000113721	PDGFRB	0.348802	1.2735	0.00818775	0.0395793	122.721	81.9442	156.286	113.087
ENSG00000188811	NHLRC3	0.348486	1.27322	1.04615e-05	0.000287012	29.0357	10.4389	36.969	18.1567
ENSG00000211599	IGKV5-2	0.348436	1.27318	0.266539	0.444913	2.81667	6.62512	3.58613	9.57113
ENSG00000149131	SERPING1	0.34842	1.27317	0.00350526	0.0213934	281.196	150.094	358.01	223.716
ENSG00000014914	MTMR11	0.348338	1.27309	0.0165546	0.0655202	25.589	15.1515	32.5772	31.5882
ENSG00000111666	CHPT1	0.347864	1.27268	0.0153476	0.0621132	30.7191	27.0172	39.0955	26.981
ENSG00000228929	RPS13P2	0.347808	1.27263	0.0298767	0.0988643	1.15122	0.933088	1.46507	1.46847
ENSG00000254415	SIGLEC14	0.347782	1.2726	0.04108	0.123935	4.65176	2.97148	5.91984	5.66611
ENSG00000110090	CPT1A	0.347589	1.27243	0.00244716	0.0164775	60.9117	29.0889	77.5061	68.4752
ENSG00000174915	PTDSS2	0.347398	1.27226	0.000106265	0.00157918	26.2377	11.842	33.3813	13.8574
ENSG00000099904	ZDHHC8	0.347328	1.2722	0.000199241	0.00254355	34.6483	16.3841	44.0796	16.086
ENSG00000111057	KRT18	0.347151	1.27205	0.00266228	0.0174926	696.067	398.63	885.429	501.966
ENSG00000183484	GPR132	0.347122	1.27202	0.0244291	0.0861053	10.4531	6.08359	13.2965	10.1962
ENSG00000145506	NKD2	0.347086	1.27199	0.0487773	0.139313	9.58036	7.87628	12.1861	10.2909
ENSG00000100376	FAM118A	0.346282	1.27128	0.00388242	0.0230115	19.5858	11.9558	24.8991	19.1232
ENSG00000120318	ARAP3	0.346181	1.27119	0.00174201	0.0127201	18.7995	10.0003	23.8977	13.0919
ENSG00000160410	SHKBP1	0.346151	1.27116	2.23918e-05	0.000507058	76.7428	28.2117	97.5528	40.0291
ENSG00000257270	AL928654.2	0.345932	1.27097	0.0630064	0.166649	1.29959	1.35738	1.65174	1.3771
ENSG00000123989	CHPF	0.345843	1.27089	0.00243478	0.0164232	141.519	91.3126	179.856	86.1229
ENSG00000079277	MKNK1	0.345759	1.27082	3.2458e-07	2.09293e-05	32.3202	8.16235	41.0731	15.511
ENSG00000114999	TTL	0.345357	1.27047	3.35414e-05	0.000681153	32.8177	13.2113	41.6938	18.7898
ENSG00000137767	SQOR	0.345337	1.27045	0.00551361	0.0299214	58.0158	33.0796	73.706	43.2604
ENSG00000103710	RASL12	0.345172	1.2703	0.00762029	0.0377907	11.5551	7.22532	14.6784	8.95143
ENSG00000063176	SPHK2	0.345131	1.27027	0.00010027	0.00151179	13.8313	6.11285	17.5694	7.23723
ENSG00000130830	MPP1	0.345097	1.27024	0.00621013	0.0324971	25.4894	13.1623	32.3776	26.5813
ENSG00000134152	KATNBL1	0.344874	1.27004	0.000204306	0.00258795	21.9856	9.13561	27.9226	26.2404
ENSG00000242265	PEG10	0.34482	1.26999	0.306948	0.490202	121.415	173.922	154.196	464.406
ENSG00000104936	DMPK	0.344752	1.26993	0.00628967	0.032793	26.9302	19.0415	34.1995	21.8856
ENSG00000006015	REX1BD	0.344184	1.26943	0.00250963	0.0167206	18.066	11.4454	22.9336	12.1186
ENSG00000064547	LPAR2	0.343716	1.26902	5.15904e-05	0.000922887	18.319	7.46113	23.2472	9.11776
ENSG00000067057	PFKP	0.343702	1.26901	0.0443996	0.130323	155.764	145.877	197.666	160.012
ENSG00000167645	YIF1B	0.343333	1.26868	4.05934e-05	0.00080016	33.9935	12.576	43.127	20.5722
ENSG00000123095	BHLHE41	0.34297	1.26837	0.0358664	0.112467	19.0155	13.5114	24.1186	23.0907
ENSG00000138834	MAPK8IP3	0.342902	1.26831	0.0268069	0.0919588	63.3471	47.7875	80.3435	60.7999
ENSG00000211664	IGLV2-18	0.342605	1.26804	0.287157	0.46752	6.08873	14.0988	7.72078	15.9952
ENSG00000141012	GALNS	0.342469	1.26792	6.37558e-05	0.00106849	25.6867	10.4893	32.5687	13.5939
ENSG00000100092	SH3BP1	0.3424	1.26786	0.000839607	0.00744556	21.5325	10.3002	27.3002	14.0436
ENSG00000106004	HOXA5	0.341746	1.26729	0.00886583	0.041795	4.58651	2.80177	5.81243	3.69073
ENSG00000100263	RHBDD3	0.341203	1.26681	0.000297426	0.00342535	22.0405	11.1474	27.9212	11.6933
ENSG00000155465	SLC7A7	0.340694	1.26637	0.00989583	0.0452489	32.8467	20.3677	41.5959	26.4751
ENSG00000211625	IGKV3D-20	0.340619	1.2663	0.187381	0.353135	7.59294	9.44177	9.61493	12.5621
ENSG00000243238	IGKV2-30	0.340526	1.26622	0.223367	0.396055	3.39512	5.48785	4.29896	9.109
ENSG00000104825	NFKBIB	0.340501	1.2662	0.000136312	0.00192541	23.6307	11.1102	29.9212	13.2597
ENSG00000015475	BID	0.340455	1.26616	0.00162755	0.0121169	29.5301	19.5537	37.3897	19.525
ENSG00000131389	SLC6A6	0.340367	1.26608	0.000185142	0.00241213	89.582	36.0241	113.418	53.2723
ENSG00000149418	ST14	0.339892	1.26566	0.000789804	0.00718822	281.717	127.711	356.559	173.973
ENSG00000099256	PRTFDC1	0.339683	1.26548	0.0412563	0.124237	10.0804	9.2615	12.7565	13.8388
ENSG00000279088	AC022400.8	0.339565	1.26538	0.00660267	0.0340221	3.90644	2.41914	4.94311	3.0563
ENSG00000130204	TOMM40	0.339112	1.26498	0.000274828	0.00323696	58.4971	25.2689	73.9975	39.4061
ENSG00000205356	TECPR1	0.33846	1.26441	0.000677504	0.00638137	41.0465	22.0781	51.8994	22.3395
ENSG00000138413	IDH1	0.338422	1.26437	0.00321758	0.0200778	156.637	72.4153	198.047	142.223
ENSG00000130529	TRPM4	0.338196	1.26417	0.014902	0.0608068	49.1797	38.2454	62.1718	40.8213
ENSG00000106819	ASPN	0.338104	1.26409	0.105601	0.240276	30.3733	30.6652	38.3948	52.6892
ENSG00000130309	COLGALT1	0.337982	1.26399	0.000159492	0.00217477	114.124	50.9589	144.251	59.885
ENSG00000134884	ARGLU1	0.337871	1.26389	0.00321578	0.0200775	65.1889	38.0582	82.3916	50.2145
ENSG00000100079	LGALS2	0.337672	1.26372	0.0920971	0.217126	3.20808	2.95977	4.0541	6.023
ENSG00000101335	MYL9	0.337666	1.26371	0.00684746	0.0349548	143.838	81.2876	181.769	129.333
ENSG00000129968	ABHD17A	0.3375	1.26357	5.60551e-05	0.000978423	26.3453	10.5698	33.289	12.2519
ENSG00000115414	FN1	0.337294	1.26338	0.0641572	0.169183	2871.46	2803.35	3627.75	4182.37
ENSG00000131477	RAMP2	0.337198	1.2633	0.0197137	0.0737921	12.8629	12.5962	16.2497	12.595
ENSG00000124225	PMEPA1	0.336975	1.26311	0.0232302	0.0832159	114.161	85.201	144.197	115.611
ENSG00000130311	DDA1	0.336751	1.26291	1.79312e-06	7.46892e-05	37.9362	11.5075	47.91	18.371
ENSG00000184164	CRELD2	0.336686	1.26285	0.00207892	0.01461	52.4798	29.6507	66.2743	39.5794
ENSG00000269858	EGLN2	0.336575	1.26276	8.97156e-05	0.0013969	25.5561	9.59584	32.2711	15.6234
ENSG00000102878	HSF4	0.336502	1.26269	0.0954107	0.223186	16.8845	20.2354	21.3199	20.5601
ENSG00000006831	ADIPOR2	0.336484	1.26268	0.000140015	0.00196313	71.8668	28.7791	90.7444	50.2197
ENSG00000188112	C6orf132	0.336386	1.26259	0.00385634	0.0228874	34.689	18.0183	43.798	27.6333
ENSG00000241839	PLEKHO2	0.336266	1.26249	0.00119033	0.00965547	44.0877	22.2815	55.6601	31.5611
ENSG00000123395	ATG101	0.336252	1.26247	4.89626e-05	0.000894097	26.8691	9.19828	33.9215	16.8313
ENSG00000099899	TRMT2A	0.336108	1.26235	0.000228933	0.00282467	32.6594	17.5662	41.2274	21.5894
ENSG00000166025	AMOTL1	0.336107	1.26235	0.0140668	0.0586113	37.5012	29.3382	47.3395	29.2565
ENSG00000222345	SNORD19C	0.335901	1.26217	0.0679955	0.175971	0.235844	0.192048	0.297674	0.229028
ENSG00000114853	ZBTB47	0.335787	1.26207	0.000395847	0.00423809	12.9672	5.87449	16.3655	6.96942
ENSG00000125730	C3	0.335776	1.26206	0.123267	0.2666	1093.45	1410.03	1380	1645.23
ENSG00000115504	EHBP1	0.335671	1.26196	0.000350215	0.00385067	33.6819	17.5013	42.5053	19.8887
ENSG00000175906	ARL4D	0.335541	1.26185	0.0560164	0.153608	10.8928	11.976	13.7451	14.1831
ENSG00000205060	SLC35B4	0.335454	1.26177	9.09117e-05	0.00140975	18.087	6.61043	22.8218	12.4883
ENSG00000137831	UACA	0.335312	1.26165	0.00363831	0.0219588	37.8867	24.2862	47.7998	25.3082
ENSG00000105289	TJP3	0.334964	1.26135	0.0176849	0.0683038	42.1837	24.8523	53.2082	38.4411
ENSG00000077150	NFKB2	0.334787	1.26119	0.000290696	0.00337166	60.4097	24.4541	76.1882	36.608
ENSG00000122861	PLAU	0.334612	1.26104	0.154678	0.310417	182.777	266.176	230.489	301.205
ENSG00000163814	CDCP1	0.334594	1.26102	0.0366323	0.114168	71.4256	49.6645	90.0693	75.6536
ENSG00000099219	ERMP1	0.334557	1.26099	0.0102027	0.0462628	43.939	34.7098	55.4066	50.1755
ENSG00000077942	FBLN1	0.334512	1.26095	0.0310003	0.101639	144.368	118.503	182.041	131.605
ENSG00000197530	MIB2	0.33445	1.2609	0.00378815	0.0225884	29.3557	17.8911	37.0145	18.6368
ENSG00000146112	PPP1R18	0.334322	1.26079	0.00385121	0.0228709	75.9395	44.0177	95.7434	59.8347
ENSG00000104852	SNRNP70	0.334269	1.26074	0.000209479	0.00263302	150.203	68.2898	189.366	79.3472
ENSG00000094914	AAAS	0.333826	1.26035	1.2396e-07	9.69008e-06	34.6152	10.6157	43.6273	12.2044
ENSG00000168234	TTC39C	0.333616	1.26017	0.0131868	0.0557728	28.6749	17.2489	36.1351	37.1792
ENSG00000110777	POU2AF1	0.333614	1.26017	0.114028	0.253192	20.2807	20.9314	25.5571	25.5555
ENSG00000131871	SELENOS	0.333435	1.26001	5.85745e-05	0.00100227	63.4589	24.8839	79.9589	42.8737
ENSG00000109062	SLC9A3R1	0.333308	1.2599	0.00803301	0.0391631	62.5325	49.5835	78.7846	48.4397
ENSG00000032444	PNPLA6	0.333244	1.25984	7.28204e-05	0.00119583	61.6217	23.7787	77.6337	32.7744
ENSG00000198792	TMEM184B	0.333195	1.2598	9.58609e-05	0.00146512	94.9677	44.522	119.64	50.2995
ENSG00000115009	CCL20	0.332886	1.25953	0.304178	0.486967	36.2712	69.3351	45.6846	96.2849
ENSG00000090924	PLEKHG2	0.332843	1.25949	0.0547497	0.151502	66.6864	77.8	83.9911	78.0196
ENSG00000198848	CES1	0.332651	1.25932	0.285715	0.465883	100.646	359.626	126.746	276.178
ENSG00000141084	RANBP10	0.332572	1.25926	0.00124783	0.010001	21.694	11.6899	27.3183	15.3823
ENSG00000035862	TIMP2	0.332463	1.25916	0.0097671	0.044894	279.305	171.055	351.691	263.187
ENSG00000196754	S100A2	0.332308	1.25903	0.27775	0.457624	37.8809	74.5637	47.693	134.364
ENSG00000159840	ZYX	0.332286	1.25901	0.000930474	0.00809413	170.522	75.0145	214.688	101.453
ENSG00000213722	DDAH2	0.332163	1.2589	0.00372625	0.0222879	60.8087	35.0882	76.552	60.4866
ENSG00000173540	GMPPB	0.331649	1.25845	4.0507e-07	2.3708e-05	31.9037	10.0766	40.1492	13.1921
ENSG00000158201	ABHD3	0.331438	1.25827	0.00284155	0.0183431	27.3633	14.2642	34.4304	27.5846
ENSG00000139323	POC1B	0.33125	1.2581	0.00229891	0.0157488	23.8142	12.5059	29.9607	21.747
ENSG00000219200	RNASEK	0.331206	1.25806	2.74996e-05	0.000595546	6.39865	3.3137	8.04992	2.76692
ENSG00000126787	DLGAP5	0.331066	1.25794	0.0893083	0.212198	16.3251	17.1053	20.536	22.278
ENSG00000071655	MBD3	0.330961	1.25785	0.00019198	0.00248421	54.1834	25.8925	68.1547	24.5185
ENSG00000275302	CCL4	0.330828	1.25774	0.0519327	0.145808	10.7646	9.04221	13.5391	13.0018
ENSG00000101439	CST3	0.330584	1.25752	0.0162412	0.0645857	322.32	167.772	405.325	561.511
ENSG00000125885	MCM8	0.330581	1.25752	0.0146566	0.0601506	16.7224	12.0803	21.0288	16.0108
ENSG00000107731	UNC5B	0.330258	1.25724	0.0153221	0.062033	42.6262	31.8683	53.5912	40.283
ENSG00000040608	RTN4R	0.330039	1.25705	0.0200596	0.0747195	6.86975	4.07846	8.6356	6.3108
ENSG00000197114	ZGPAT	0.329893	1.25692	0.0023179	0.0158598	8.90203	4.96287	11.1891	4.98082
ENSG00000103888	CEMIP	0.329874	1.2569	0.18008	0.34386	59.4754	118.015	74.7548	89.5217
ENSG00000170542	SERPINB9	0.329815	1.25685	0.0105616	0.0474565	26.9724	20.3015	33.9004	19.7377
ENSG00000173638	SLC19A1	0.329492	1.25657	0.000888019	0.00780814	27.5369	11.7922	34.602	17.5638
ENSG00000211956	IGHV4-34	0.329422	1.25651	0.206527	0.376593	36.1654	44.3148	45.4422	63.0122
ENSG00000164087	POC1A	0.329321	1.25642	0.00637178	0.0331002	9.17832	4.71866	11.5318	8.10314
ENSG00000152492	CCDC50	0.329289	1.25639	0.000728559	0.00675471	47.3562	21.6404	59.498	30.2845
ENSG00000166341	DCHS1	0.329111	1.25624	0.0475467	0.13686	26.7206	48.1444	33.5675	25.8574
ENSG00000229644	NAMPTP1	0.329093	1.25622	0.159271	0.317011	9.1617	14.4797	11.5091	13.4606
ENSG00000125089	SH3TC1	0.32837	1.25559	0.000864626	0.00762006	27.8126	10.9221	34.9213	17.6672
ENSG00000002933	TMEM176A	0.328347	1.25557	0.0862319	0.207149	76.2635	119.747	95.7545	102.549
ENSG00000183444	OR7E38P	0.328291	1.25553	0.0126574	0.0540438	4.56399	2.93322	5.73021	3.80776
ENSG00000161642	ZNF385A	0.328032	1.2553	0.00353511	0.0214607	37.0821	20.4504	46.5492	29.1913
ENSG00000131634	TMEM204	0.327988	1.25526	0.00810572	0.0393409	16.1713	8.65867	20.2992	13.8546
ENSG00000242114	MTFP1	0.327855	1.25515	0.00295399	0.0189085	5.2626	3.47071	6.60532	3.36158
ENSG00000104951	IL4I1	0.32762	1.25494	0.0846471	0.204374	16.596	16.2064	20.827	19.7752
ENSG00000075399	VPS9D1	0.327599	1.25492	0.00184284	0.0133032	22.3019	12.9041	27.9872	13.9129
ENSG00000149554	CHEK1	0.327542	1.25487	0.0295497	0.0981523	16.3706	13.0592	20.5431	17.1861
ENSG00000210196	MT-TP	0.327503	1.25484	0.00929366	0.0434174	39.8039	30.7767	49.9475	31.5927
ENSG00000150093	ITGB1	0.326985	1.25439	0.0022262	0.0154173	336.732	168.143	422.393	235.438
ENSG00000160072	ATAD3B	0.326967	1.25437	0.00784466	0.0385246	27.2037	18.5743	34.1236	16.8362
ENSG00000139410	SDSL	0.326819	1.25424	0.0159668	0.0638335	15.872	9.48192	19.9074	14.4588
ENSG00000167895	TMC8	0.326456	1.25393	0.0251263	0.0879383	30.2356	24.8585	37.9133	29.4646
ENSG00000140284	SLC27A2	0.326397	1.25388	0.100673	0.232024	12.7889	15.0752	16.0357	15.5796
ENSG00000123815	COQ8B	0.326368	1.25385	3.2544e-05	0.000663994	34.0244	11.7573	42.6616	16.8464
ENSG00000104885	DOT1L	0.326317	1.25381	0.00137832	0.0107085	30.8643	17.6841	38.6979	16.0135
ENSG00000185187	SIGIRR	0.326286	1.25378	0.00133383	0.0104986	42.2589	19.5908	52.9835	28.3508
ENSG00000015285	WAS	0.32622	1.25372	0.0118703	0.0515315	15.7463	8.78307	19.7415	13.5185
ENSG00000143110	C1orf162	0.326218	1.25372	0.0237091	0.0843426	19.5694	11.4074	24.5346	20.8057
ENSG00000175793	SFN	0.326217	1.25372	0.0359759	0.112738	160.392	87.6943	201.087	178.282
ENSG00000196588	MRTFA	0.326178	1.25369	7.31439e-06	0.000215401	48.3061	15.3711	60.5608	21.6334
ENSG00000197930	ERO1A	0.326108	1.25363	0.0206048	0.0761049	208.687	147.724	261.616	227.092
ENSG00000134470	IL15RA	0.325888	1.25344	0.0115136	0.0504476	21.1038	11.9519	26.4523	18.0959
ENSG00000103174	NAGPA	0.325671	1.25325	2.75612e-05	0.000595676	15.8837	5.43922	19.9062	7.53865
ENSG00000198901	PRC1	0.325648	1.25323	0.0328075	0.105921	29.8843	25.899	37.4519	26.1064
ENSG00000226396	AL031727.1	0.325481	1.25308	0.022719	0.0818991	0.965618	0.643973	1.21	0.983532
ENSG00000139233	LLPH	0.325321	1.25294	0.000120411	0.00174387	23.2117	7.18678	29.0829	19.6825
ENSG00000089692	LAG3	0.325208	1.25284	0.108797	0.24491	8.24161	9.31686	10.3255	11.5936
ENSG00000263266	RPS7P1	0.32513	1.25278	0.0555685	0.152933	5.26678	4.22698	6.5981	9.78649
ENSG00000168476	REEP4	0.324887	1.25257	9.12469e-05	0.00141303	26.6349	11.2157	33.362	12.0071
ENSG00000158062	UBXN11	0.32483	1.25252	0.00937835	0.0436613	25.1761	17.955	31.5335	19.9026
ENSG00000139190	VAMP1	0.32464	1.25235	0.0156436	0.0629551	8.33812	5.5251	10.4423	6.34693
ENSG00000242193	CRYZL2P	0.324463	1.2522	0.00371118	0.0222573	14.9582	8.24304	18.7307	9.69903
ENSG00000166927	MS4A7	0.324351	1.2521	0.0439823	0.129474	31.9743	24.6666	40.0351	39.7865
ENSG00000107738	VSIR	0.324239	1.252	0.00135748	0.0106372	43.7143	18.632	54.7305	27.5844
ENSG00000140548	ZNF710	0.324147	1.25192	0.0371221	0.115313	45.8992	47.1656	57.4623	69.3707
ENSG00000007312	CD79B	0.323932	1.25174	0.114681	0.254246	7.29229	7.83753	9.12803	16.4908
ENSG00000103187	COTL1	0.323916	1.25172	0.0082497	0.0397861	154.777	86.0642	193.738	118.99
ENSG00000128272	ATF4	0.323805	1.25163	2.0528e-05	0.000469723	234.025	83.7419	292.912	106.609
ENSG00000160447	PKN3	0.323375	1.25125	0.00304876	0.0193201	12.2146	6.78221	15.2835	7.85695
ENSG00000211639	IGLV4-60	0.323108	1.25102	0.351069	0.534579	5.31854	10.8017	6.65362	14.9517
ENSG00000082781	ITGB5	0.322607	1.25059	0.00249241	0.0166447	143.615	71.4631	179.603	114.601
ENSG00000211942	IGHV3-13	0.3226	1.25058	0.257932	0.435663	6.8255	10.2023	8.53585	16.0518
ENSG00000158714	SLAMF8	0.322508	1.2505	0.0373954	0.115977	27.2217	19.5394	34.0408	25.6958
ENSG00000100106	TRIOBP	0.322366	1.25038	0.000120557	0.00174387	25.5553	9.74058	31.9539	14.2367
ENSG00000211632	IGKV3D-11	0.322349	1.25036	0.209959	0.380239	2.79084	3.50786	3.48957	5.54202
ENSG00000171823	FBXL14	0.322165	1.25021	0.00111946	0.00924953	10.8437	5.10991	13.5568	6.59797
ENSG00000124762	CDKN1A	0.32212	1.25017	0.00518864	0.0286492	110.21	60.6934	137.781	70.8928
ENSG00000145020	AMT	0.321933	1.25	0.0535114	0.14903	11.0795	8.58942	13.8494	11.1063
ENSG00000118515	SGK1	0.321777	1.24987	0.037769	0.116597	106.491	96.0498	133.1	115.529
ENSG00000128228	SDF2L1	0.321099	1.24928	0.00640375	0.0332512	30.2122	19.8021	37.7435	24.0999
ENSG00000261040	WFDC21P	0.32101	1.2492	0.247041	0.423918	7.28537	31.2281	9.10092	14.8853
ENSG00000077238	IL4R	0.321008	1.2492	0.000198326	0.00253755	88.621	34.5889	110.706	41.4524
ENSG00000084774	CAD	0.321006	1.2492	0.00351208	0.0213993	66.3715	33.2795	82.9113	60.9669
ENSG00000153879	CEBPG	0.321003	1.2492	0.000815538	0.00734037	43.9152	21.0347	54.8588	33.8774
ENSG00000105989	WNT2	0.320834	1.24905	0.084502	0.204346	8.16456	8.00821	10.198	10.1851
ENSG00000091592	NLRP1	0.320628	1.24887	0.0292591	0.0975559	32.1505	20.5845	40.1519	30.5662
ENSG00000120662	MTRF1	0.320612	1.24886	0.000505172	0.00509322	7.59696	4.11687	9.48755	4.7087
ENSG00000185101	ANO9	0.320563	1.24882	0.071363	0.182411	40.2439	38.4428	50.2573	45.9729
ENSG00000113448	PDE4D	0.3201	1.24842	0.103349	0.236663	55.8457	59.7269	69.7187	70.1138
ENSG00000175463	TBC1D10C	0.320058	1.24838	0.0524993	0.146928	12.9342	10.5982	16.1468	13.5727
ENSG00000163520	FBLN2	0.319972	1.24831	0.0439496	0.129411	59.6285	40.2724	74.4346	60.115
ENSG00000097021	ACOT7	0.319963	1.2483	0.00506355	0.0281025	29.6406	14.4255	37.0004	30.3605
ENSG00000105429	MEGF8	0.319827	1.24818	0.00535875	0.0292909	49.0961	26.9085	61.2808	37.5501
ENSG00000133247	KMT5C	0.31954	1.24793	0.00688952	0.0350871	11.0229	7.93092	13.7558	7.2306
ENSG00000163812	ZDHHC3	0.319217	1.24765	0.00180763	0.0130987	84.7127	46.6872	105.692	62.2441
ENSG00000147439	BIN3	0.319062	1.24752	0.000110152	0.00163056	12.1268	5.08876	15.1285	5.57519
ENSG00000125826	RBCK1	0.318947	1.24742	5.78298e-05	0.000993994	92.1077	36.7013	114.897	41.7845
ENSG00000204673	AKT1S1	0.318911	1.24739	1.67853e-05	0.000404158	44.4785	15.9215	55.482	20.5762
ENSG00000103335	PIEZO1	0.318801	1.24729	0.0070506	0.0357003	109.461	59.9354	136.53	76.544
ENSG00000185043	CIB1	0.318438	1.24698	0.00137961	0.0107112	144.101	66.7648	179.691	90.3854
ENSG00000138031	ADCY3	0.318345	1.2469	0.00175376	0.0127896	27.3418	13.4105	34.0924	17.384
ENSG00000273132	AL355312.4	0.318279	1.24684	0.194748	0.362469	2.50043	3.78727	3.11764	4.15292
ENSG00000082074	FYB1	0.318213	1.24679	0.0507004	0.143158	33.3091	24.7405	41.5293	46.2461
ENSG00000101084	RAB5IF	0.318186	1.24676	0.0042453	0.0246683	31.2902	18.877	39.0115	22.7103
ENSG00000013375	PGM3	0.318037	1.24663	0.000324455	0.00364828	45.5501	18.1844	56.7842	30.0311
ENSG00000167123	CERCAM	0.317897	1.24651	0.0147989	0.0605376	51.9063	32.9199	64.7019	41.6874
ENSG00000166086	JAM3	0.317345	1.24603	0.0296225	0.0983368	21.2773	19.152	26.5122	30.3801
ENSG00000197976	AKAP17A	0.316719	1.24549	0.00163631	0.0121549	45.2361	23.3331	56.3413	25.8572
ENSG00000121797	CCRL2	0.316566	1.24536	0.0354777	0.111637	7.19321	5.91205	8.95816	6.80475
ENSG00000232442	MHENCR	0.316536	1.24534	0.0271083	0.0924095	3.70657	2.66911	4.61593	3.37756
ENSG00000188060	RAB42	0.31648	1.24529	0.0349044	0.110503	7.1577	5.15097	8.9134	8.04049
ENSG00000198113	TOR4A	0.316437	1.24525	0.00671689	0.0344539	37.6341	18.1351	46.8639	25.4744
ENSG00000188290	HES4	0.316383	1.24521	0.0420146	0.12556	6.28324	5.95851	7.82393	4.9592
ENSG00000089094	KDM2B	0.316077	1.24494	2.76932e-05	0.000596344	28.8335	9.01793	35.8959	15.2479
ENSG00000119699	TGFB3	0.31581	1.24471	0.012312	0.0529452	21.7465	13.2664	27.0681	17.788
ENSG00000196123	KIAA0895L	0.315575	1.24451	0.0195176	0.0733282	19.1236	13.9302	23.7995	14.4225
ENSG00000100077	GRK3	0.315329	1.2443	0.0140964	0.0586947	33.9844	23.3324	42.2866	29.5815
ENSG00000111319	SCNN1A	0.315306	1.24428	0.0715453	0.182713	320.725	271.38	399.07	387.062
ENSG00000099204	ABLIM1	0.315266	1.24424	0.0335121	0.107497	136.4	95.8933	169.714	122.511
ENSG00000184281	TSSC4	0.315248	1.24423	2.05373e-05	0.000469723	28.3058	9.68845	35.2188	11.2809
ENSG00000073008	PVR	0.315144	1.24414	0.00303237	0.0192697	51.1047	27.9587	63.5811	35.5604
ENSG00000140526	ABHD2	0.31501	1.24402	0.0214972	0.0786769	200.454	125.296	249.369	233.495
ENSG00000141499	WRAP53	0.314974	1.24399	4.50305e-05	0.000843763	11.6856	4.2935	14.5368	5.6298
ENSG00000124496	TRERF1	0.314751	1.2438	0.0173863	0.0675161	16.0055	11.4119	19.9076	12.0244
ENSG00000140464	PML	0.314689	1.24374	0.00263585	0.017389	98.7128	54.0841	122.773	61.313
ENSG00000167315	ACAA2	0.314605	1.24367	0.00358068	0.0216912	46.1239	24.21	57.3629	30.0965
ENSG00000244165	P2RY11	0.314553	1.24363	0.0115612	0.0505656	5.18688	3.29507	6.45054	4.30135
ENSG00000248008	NRAV	0.314244	1.24336	0.000321572	0.003623	8.59827	3.72233	10.6907	4.98005
ENSG00000113758	DBN1	0.314142	1.24327	0.0127243	0.0542687	106.599	72.7219	132.532	69.3622
ENSG00000203760	CENPW	0.313883	1.24305	0.0749487	0.188839	7.01937	7.83211	8.72542	8.33023
ENSG00000158717	RNF166	0.313625	1.24283	0.00116001	0.00948364	21.3199	9.33614	26.497	14.1087
ENSG00000158869	FCER1G	0.313302	1.24255	0.0360781	0.112842	49.8611	32.5398	61.9549	52.8174
ENSG00000121060	TRIM25	0.313167	1.24243	0.000952804	0.00824439	44.8915	21.2764	55.7747	24.4803
ENSG00000099849	RASSF7	0.313109	1.24238	0.016987	0.0666688	66.6591	38.7548	82.8161	56.0832
ENSG00000127084	FGD3	0.313078	1.24236	0.0143146	0.0593868	14.631	8.36974	18.1769	12.1621
ENSG00000111640	GAPDH	0.312909	1.24221	0.00646594	0.0335131	1926	1158.83	2392.5	1282.23
ENSG00000125731	SH2D3A	0.312737	1.24206	0.00745382	0.0371163	29.2386	15.797	36.3161	21.6549
ENSG00000085788	DDHD2	0.312726	1.24205	0.0166257	0.0656571	41.8179	39.6323	51.94	90.6081
ENSG00000081760	AACS	0.312267	1.24166	0.00482766	0.0272786	43.6429	31.8149	54.1896	32.0632
ENSG00000167674	HDGFL2	0.312216	1.24161	2.29962e-05	0.000516644	41.8429	15.7345	51.9526	15.3124
ENSG00000077420	APBB1IP	0.31204	1.24146	0.0195369	0.0733282	17.3694	10.8597	21.5635	13.462
ENSG00000173153	ESRRA	0.312035	1.24146	0.000232281	0.00285671	47.1781	19.0636	58.5696	24.1765
ENSG00000152804	HHEX	0.311912	1.24135	0.0113355	0.0499894	8.16246	6.659	10.1325	5.92475
ENSG00000076928	ARHGEF1	0.311621	1.2411	0.00217703	0.0151367	124.854	64.007	154.956	72.5143
ENSG00000084207	GSTP1	0.311617	1.2411	0.0113837	0.0501049	642.529	338.736	797.441	569.518
ENSG00000146072	TNFRSF21	0.311453	1.24096	0.0153978	0.0622292	193.551	111.714	240.189	166.884
ENSG00000101294	HM13	0.311371	1.24089	4.58183e-06	0.00015461	200.128	65.258	248.336	83.4959
ENSG00000211896	IGHG1	0.311293	1.24082	0.24542	0.421771	4730.38	6823.16	5869.55	7974.52
ENSG00000137801	THBS1	0.311176	1.24072	0.078838	0.194841	349.371	350.32	433.472	448.509
ENSG00000182087	TMEM259	0.310993	1.24056	0.000238388	0.00289746	101.579	41.8182	126.015	47.0835
ENSG00000171115	GIMAP8	0.310782	1.24038	0.0250201	0.0876473	15.1838	10.1392	18.8337	13.3447
ENSG00000004534	RBM6	0.310618	1.24024	0.00228293	0.0156769	69.6337	34.5257	86.3624	40.4981
ENSG00000213923	CSNK1E	0.310562	1.24019	0.000325922	0.00365303	115.924	65.2697	143.768	55.3628
ENSG00000196476	C20orf96	0.310198	1.23988	0.00777483	0.03833	10.8434	6.27915	13.4445	7.47421
ENSG00000136425	CIB2	0.310086	1.23978	0.104308	0.238475	5.8076	5.82679	7.20015	8.38315
ENSG00000070882	OSBPL3	0.310023	1.23973	0.00964929	0.0444779	40.5878	24.6448	50.3178	27.5612
ENSG00000185100	ADSS1	0.309891	1.23961	0.103997	0.237907	15.9081	20.2418	19.7199	20.1463
ENSG00000167641	PPP1R14A	0.309698	1.23945	0.0395987	0.120848	7.01094	4.977	8.6897	6.08176
ENSG00000105369	CD79A	0.309604	1.23937	0.165293	0.325133	25.3785	27.9069	31.4533	40.1944
ENSG00000183597	TANGO2	0.309539	1.23931	5.77109e-05	0.000993446	22.3398	8.10374	27.686	14.2844
ENSG00000113108	APBB3	0.309479	1.23926	0.0169507	0.066572	12.7124	7.73255	15.754	9.33823
ENSG00000110455	ACCS	0.309211	1.23903	0.0375906	0.116317	17.6641	11.1415	21.8863	16.6067
ENSG00000095066	HOOK2	0.309053	1.23889	0.00293459	0.018816	40.8812	20.525	50.6475	26.2999
ENSG00000100029	PES1	0.308858	1.23873	1.87462e-05	0.000439324	71.129	26.6118	88.1094	31.5972
ENSG00000164283	ESM1	0.308803	1.23868	0.130278	0.276986	16.655	16.6112	20.6303	24.2744
ENSG00000060069	CTDP1	0.308779	1.23866	7.56962e-06	0.000218714	24.3961	8.08688	30.2185	8.21771
ENSG00000060138	YBX3	0.308249	1.2382	0.000296631	0.00341965	150.305	66.7641	186.108	68.6912
ENSG00000265681	RPL17	0.308146	1.23812	0.00677552	0.0346923	35.2453	19.0656	43.6378	49.9335
ENSG00000203668	CHML	0.308024	1.23801	0.0443544	0.130323	38.4471	23.8727	47.5979	46.9938
ENSG00000211445	GPX3	0.307831	1.23785	0.0753532	0.189512	185.896	163.464	230.111	240.45
ENSG00000123159	GIPC1	0.307795	1.23781	0.000365769	0.00395939	114.432	47.1507	141.646	57.526
ENSG00000173369	C1QB	0.307501	1.23756	0.0760824	0.19059	222.569	179.534	275.442	220.583
ENSG00000145358	DDIT4L	0.307398	1.23747	0.28817	0.468836	11.7726	22.1939	14.5683	27.1501
ENSG00000142002	DPP9	0.307169	1.23728	0.000450052	0.00464589	89.3086	36.6407	110.5	49.2378
ENSG00000188566	NDOR1	0.30709	1.23721	0.00180174	0.0130796	13.9163	7.22864	17.2173	7.52834
ENSG00000213145	CRIP1	0.306979	1.23711	0.0531869	0.14838	7.56033	6.21045	9.353	7.39441
ENSG00000080986	NDC80	0.306861	1.23701	0.107025	0.242453	11.9993	13.9925	14.8432	15.8364
ENSG00000147454	SLC25A37	0.306509	1.23671	0.0258674	0.0898977	71.205	51.1363	88.06	57.5543
ENSG00000101447	FAM83D	0.306422	1.23664	0.0842035	0.203821	14.0769	12.5394	17.408	14.315
ENSG00000114554	PLXNA1	0.306232	1.23647	0.0122611	0.0528059	100.701	55.8385	124.514	105.804
ENSG00000171163	ZNF692	0.306191	1.23644	0.0192765	0.0727283	30.1175	18.1574	37.2385	25.965
ENSG00000229152	ANKRD10-IT1	0.306163	1.23642	0.0437259	0.128888	7.12286	5.37847	8.80681	6.11908
ENSG00000026025	VIM	0.305743	1.23605	0.0140559	0.0586113	682.018	373.89	843.012	662.975
ENSG00000160113	NR2F6	0.305316	1.23569	0.00387445	0.0229829	57.3797	28.0607	70.9035	44.2905
ENSG00000081923	ATP8B1	0.3051	1.2355	0.0294098	0.0978143	68.7866	47.2765	84.9861	75.1923
ENSG00000054598	FOXC1	0.305077	1.23548	0.0924273	0.217679	12.962	14.4673	16.0144	14.7396
ENSG00000167600	CYP2S1	0.305042	1.23545	0.153207	0.308706	24.0943	22.432	29.7675	42.4616
ENSG00000099364	FBXL19	0.30485	1.23529	0.00279365	0.0181262	25.1197	17.1799	31.0301	12.2691
ENSG00000161281	COX7A1	0.304387	1.23489	0.0285712	0.0958786	4.80117	3.54395	5.92893	4.8509
ENSG00000111678	C12orf57	0.304111	1.23466	0.0166629	0.06577	48.6935	36.7495	60.1197	57.625
ENSG00000140859	KIFC3	0.303904	1.23448	0.00636022	0.0330853	67.7115	39.2393	83.5885	41.2506
ENSG00000155659	VSIG4	0.303794	1.23439	0.125133	0.269257	46.9697	58.459	57.9787	60.2003
ENSG00000054611	TBC1D22A	0.303779	1.23437	1.58395e-05	0.000386253	36.2653	12.1612	44.7649	14.3993
ENSG00000182378	PLCXD1	0.303722	1.23432	0.0646738	0.170192	30.5114	45.1093	37.6609	31.0187
ENSG00000173269	MMRN2	0.303611	1.23423	0.0227691	0.0820534	21.1784	17.5552	26.139	15.6856
ENSG00000176890	TYMS	0.303607	1.23423	0.0343944	0.109343	23.3701	20.7286	28.844	23.3064
ENSG00000166226	CCT2	0.303602	1.23422	0.0384649	0.118064	166.675	194.501	205.714	324.703
ENSG00000120896	SORBS3	0.3034	1.23405	0.00325324	0.0202427	64.3899	33.6753	79.4603	38.1524
ENSG00000161996	WDR90	0.303292	1.23396	0.0234931	0.0839206	32.0636	23.3658	39.5651	25.9341
ENSG00000188643	S100A16	0.303058	1.23376	0.057694	0.156739	191.781	159.771	236.611	173.407
ENSG00000229413	AC018638.1	0.302891	1.23361	0.040108	0.121905	1.12856	0.843872	1.39221	1.00656
ENSG00000105639	JAK3	0.302596	1.23336	0.0145559	0.0599088	27.7283	16.3835	34.199	21.5111
ENSG00000149716	LTO1	0.302171	1.233	0.00236007	0.0160605	15.2971	6.38387	18.8613	16.2782
ENSG00000127399	LRRC61	0.302142	1.23297	0.0060307	0.0318042	19.0175	13.2132	23.4481	13.6339
ENSG00000141736	ERBB2	0.302087	1.23293	0.0420903	0.125687	325.266	183.222	401.029	791.878
ENSG00000011426	ANLN	0.301431	1.23237	0.123506	0.266914	44.2307	43.0994	54.5084	55.7993
ENSG00000185800	DMWD	0.301314	1.23227	0.000171103	0.00229741	23.4529	7.92952	28.9002	17.5678
ENSG00000077984	CST7	0.301306	1.23226	0.10575	0.240422	10.1051	9.47754	12.4521	26.2694
ENSG00000104957	CCDC130	0.301254	1.23222	0.0011502	0.00943059	20.2676	9.64522	24.974	11.1212
ENSG00000179335	CLK3	0.301155	1.23213	0.000108305	0.00160739	44.2961	13.4674	54.5786	37.6849
ENSG00000167578	RAB4B	0.300861	1.23188	0.00196987	0.0139641	14.7498	6.5649	18.17	9.32906
ENSG00000259120	SMIM6	0.300758	1.23179	0.164561	0.324208	3.77742	3.87303	4.65299	5.86579
ENSG00000123485	HJURP	0.300707	1.23175	0.130033	0.276871	15.6428	18.0718	19.268	16.4182
ENSG00000090975	PITPNM2	0.300542	1.23161	0.0235162	0.0839508	24.9305	14.9986	30.7046	18.7035
ENSG00000198805	PNP	0.300511	1.23158	0.0015894	0.0119341	54.8985	26.7575	67.612	29.662
ENSG00000165714	BORCS5	0.300496	1.23157	0.00182622	0.013225	9.69386	5.34695	11.9386	6.57436
ENSG00000070423	RNF126	0.300467	1.23154	0.000204157	0.00258795	25.5436	9.76181	31.458	12.4517
ENSG00000005206	SPPL2B	0.300119	1.23125	0.0113649	0.050061	43.5362	29.7572	53.6038	31.08
ENSG00000135077	HAVCR2	0.300096	1.23123	0.0490976	0.139808	24.4606	16.3383	30.1166	24.8042
ENSG00000006555	TTC22	0.300076	1.23121	0.0239283	0.0847591	17.9427	8.13804	22.0912	17.2158
ENSG00000142669	SH3BGRL3	0.300009	1.23115	0.00287981	0.0185063	202.114	90.116	248.834	148.347
ENSG00000058453	CROCC	0.299647	1.23084	0.0092266	0.043157	24.3429	15.1903	29.9623	15.033
ENSG00000242887	IGHJ3	0.299428	1.23066	0.234955	0.409583	1.8604	2.74135	2.28951	3.14063
ENSG00000100479	POLE2	0.298678	1.23002	0.0479905	0.137721	6.36419	5.59252	7.82807	6.97819
ENSG00000139722	VPS37B	0.298627	1.22997	0.000679345	0.00638137	59.0534	22.5224	72.6341	29.7537
ENSG00000103168	TAF1C	0.298624	1.22997	0.005283	0.0290574	38.8437	22.1734	47.7766	22.979
ENSG00000143882	ATP6V1C2	0.298515	1.22988	0.268148	0.446705	12.178	19.7163	14.9774	47.8817
ENSG00000072310	SREBF1	0.298215	1.22962	0.00873631	0.0413393	126.849	73.2918	155.976	102.886
ENSG00000123136	DDX39A	0.297947	1.22939	0.00108715	0.00909634	57.5684	27.1667	70.7742	30.5576
ENSG00000275342	PRAG1	0.297653	1.22914	0.0116197	0.0507523	23.3948	14.0828	28.7556	15.9905
ENSG00000105401	CDC37	0.297466	1.22898	4.36447e-06	0.000147809	129.333	35.1281	158.948	57.414
ENSG00000169857	AVEN	0.297288	1.22883	0.000548934	0.0054573	10.3261	3.86896	12.6891	5.67832
ENSG00000198142	SOWAHC	0.297072	1.22865	0.00799071	0.0390737	22.455	12.3881	27.5892	18.1469
ENSG00000151239	TWF1	0.29697	1.22856	0.00566406	0.030478	65.5481	29.7162	80.5299	54.1382
ENSG00000143013	LMO4	0.296606	1.22825	0.00923223	0.0431657	46.6086	28.2594	57.2471	32.0523
ENSG00000204282	TNRC6C-AS1	0.296266	1.22796	0.0326024	0.105468	13.2169	9.89971	16.2299	10.1537
ENSG00000184056	VPS33B	0.29616	1.22787	8.94601e-08	7.61946e-06	15.4098	3.66309	18.9213	4.97814
ENSG00000099889	ARVCF	0.29615	1.22786	0.0193388	0.0728908	18.5403	12.138	22.765	13.5459
ENSG00000168003	SLC3A2	0.296127	1.22784	0.00142304	0.0109294	161.591	69.6446	198.408	103.155
ENSG00000154146	NRGN	0.296042	1.22777	0.259852	0.438128	36.0824	49.8997	44.3009	122.418
ENSG00000105404	RABAC1	0.296009	1.22774	0.00236552	0.0160605	79.4207	40.3974	97.5082	49.6872
ENSG00000040531	CTNS	0.296004	1.22774	0.000271229	0.00320449	20.7288	8.70681	25.4496	12.8835
ENSG00000126458	RRAS	0.295862	1.22762	0.0105932	0.047505	44.8042	27.9256	55.0025	29.3411
ENSG00000091073	DTX2	0.29582	1.22758	0.0223858	0.0810561	40.8002	25.0113	50.0856	34.3426
ENSG00000132906	CASP9	0.295813	1.22758	0.000644562	0.00613544	18.3748	6.41642	22.5565	12.7507
ENSG00000173846	PLK3	0.295656	1.22744	0.00277756	0.0180526	20.3094	9.38607	24.9286	12.5929
ENSG00000162341	TPCN2	0.295477	1.22729	7.24747e-05	0.00119186	17.2069	5.60035	21.1178	8.8747
ENSG00000050344	NFE2L3	0.295401	1.22723	0.0574687	0.156313	44.9459	32.5654	55.1587	58.2182
ENSG00000181991	MRPS11	0.294996	1.22688	4.24642e-05	0.000818654	18.3923	6.65625	22.5651	8.87171
ENSG00000111331	OAS3	0.294993	1.22688	0.0591107	0.159163	128.196	106.357	157.28	126.212
ENSG00000136490	LIMD2	0.294944	1.22684	0.033093	0.106482	30.4488	21.8706	37.3557	26.3962
ENSG00000233903		0.294939	1.22683	0.00496976	0.0278175	1.12515	0.6254	1.38037	0.781845
ENSG00000197122	SRC	0.294834	1.22674	0.000787223	0.00717618	89.4869	36.514	109.777	50.4745
ENSG00000167553	TUBA1C	0.294716	1.22664	0.00768158	0.0379523	127.632	60.3141	156.559	102.262
ENSG00000141738	GRB7	0.294413	1.22639	0.0313092	0.102358	46.0984	22.0484	56.5345	82.5979
ENSG00000180758	GPR157	0.294368	1.22635	0.011967	0.051774	23.5667	15.4705	28.9009	18.1777
ENSG00000108039	XPNPEP1	0.29436	1.22634	1.10875e-05	0.000297746	48.4649	13.2917	59.4345	21.086
ENSG00000150990	DHX37	0.294167	1.22618	0.000971162	0.00833374	28.8431	11.8618	35.3667	15.3697
ENSG00000088854	C20orf194	0.294145	1.22616	0.00421239	0.0245286	20.3597	9.61708	24.9643	13.5152
ENSG00000148343	MIGA2	0.293868	1.22592	0.00159645	0.0119791	20.7167	9.79358	25.3971	10.5127
ENSG00000142327	RNPEPL1	0.293422	1.22554	0.000564925	0.0055572	108.259	37.629	132.676	56.1554
ENSG00000180902	D2HGDH	0.293399	1.22552	0.0286205	0.0959877	26.3441	17.9131	32.2853	20.2237
ENSG00000137285	TUBB2B	0.293326	1.22546	0.433606	0.611938	15.0011	34.7593	18.3833	42.09
ENSG00000162636	FAM102B	0.293046	1.22522	0.0135832	0.0571628	20.9766	11.1579	25.7011	24.0544
ENSG00000095303	PTGS1	0.292745	1.22497	0.0558014	0.153218	21.6223	18.8928	26.4867	37.7535
ENSG00000181085	MAPK15	0.292618	1.22486	0.2091	0.379345	13.2045	17.8966	16.1737	17.9093
ENSG00000116017	ARID3A	0.292408	1.22468	0.056283	0.154153	19.2619	19.5677	23.5897	28.0808
ENSG00000148773	MKI67	0.292311	1.2246	0.117819	0.259338	73.0815	69.6164	89.4957	77.5339
ENSG00000127666	TICAM1	0.29203	1.22436	0.00317056	0.0198948	25.2489	11.1336	30.9138	16.636
ENSG00000149782	PLCB3	0.291994	1.22433	0.000564264	0.0055572	47.4189	18.7391	58.0565	22.8886
ENSG00000239951	IGKV3-20	0.29175	1.22412	0.235813	0.41064	182.37	233.749	223.243	255.429
ENSG00000196743	GM2A	0.291555	1.22396	0.00603749	0.0318042	115.807	50.7129	141.743	97.9131
ENSG00000271870	AC024060.2	0.290959	1.22345	0.0238503	0.0845354	1.53125	0.934979	1.87341	1.165
ENSG00000159335	PTMS	0.29095	1.22345	0.0116123	0.0507461	160.58	87.6125	196.461	125.546
ENSG00000184916	JAG2	0.290716	1.22325	0.065185	0.171055	37.9238	33.8997	46.3901	36.3447
ENSG00000149428	HYOU1	0.290427	1.223	0.0103219	0.0466922	261.611	138.536	319.951	194.356
ENSG00000196961	AP2A1	0.290258	1.22286	9.97373e-05	0.00150769	92.0891	30.997	112.612	39.8259
ENSG00000177156	TALDO1	0.290146	1.22276	0.0281705	0.0948686	236.11	170.613	288.706	282.028
ENSG00000128159	TUBGCP6	0.289988	1.22263	0.0136532	0.0573939	47.304	27.4383	57.8353	31.3565
ENSG00000087586	AURKA	0.289895	1.22255	0.0797132	0.196324	22.5365	19.5136	27.5521	22.8071
ENSG00000128604	IRF5	0.289795	1.22247	0.0340261	0.108505	20.3808	11.3586	24.9148	18.5775
ENSG00000279117	AP001972.5	0.28977	1.22244	0.0939799	0.220628	17.9785	14.3556	21.9778	23.8096
ENSG00000111450	STX2	0.289758	1.22243	0.00206661	0.0145414	14.7562	6.73792	18.0385	7.82591
ENSG00000155189	AGPAT5	0.289623	1.22232	0.016101	0.0642971	23.6471	14.93	28.9043	25.2156
ENSG00000085514	PILRA	0.289498	1.22221	0.0445892	0.130754	10.3861	6.80743	12.694	10.0253
ENSG00000104859	CLASRP	0.289324	1.22207	0.0039559	0.0233689	32.5656	15.9946	39.7973	20.2841
ENSG00000134905	CARS2	0.289126	1.2219	2.96428e-05	0.000623379	39.3087	14.8181	48.0313	15.0841
ENSG00000103653	CSK	0.28893	1.22173	3.48351e-05	0.00070367	64.5117	20.3621	78.8162	26.7326
ENSG00000140406	TLNRD1	0.28885	1.22167	0.000175472	0.00232868	26.0512	9.25741	31.8258	12.6907
ENSG00000108798	ABI3	0.288788	1.22161	0.0161103	0.0643117	14.2324	7.30792	17.3865	10.8892
ENSG00000198324	PHETA1	0.288676	1.22152	0.00249415	0.0166466	18.7783	9.05399	22.938	10.7267
ENSG00000133275	CSNK1G2	0.288669	1.22151	0.000149635	0.00207508	55.9	21.3276	68.2826	20.6908
ENSG00000181404	WASHC1	0.288635	1.22148	0.0200264	0.0746933	5.02461	3.17015	6.13748	4.12403
ENSG00000104907	TRMT1	0.288475	1.22135	0.000859167	0.00758953	28.891	11.9203	35.286	16.3443
ENSG00000099917	MED15	0.288422	1.2213	0.00070001	0.00652713	110.061	44.3222	134.418	52.5938
ENSG00000134057	CCNB1	0.288372	1.22126	0.088619	0.211415	42.3082	33.8975	51.6693	48.0426
ENSG00000102265	TIMP1	0.288188	1.22111	0.0156611	0.0629809	449.804	220.842	549.259	378.962
ENSG00000162929	KIAA1841	0.287946	1.2209	0.0032856	0.0203797	15.8265	7.3795	19.3226	12.0598
ENSG00000226742	HSBP1L1	0.287847	1.22082	0.00849936	0.0405193	18.4933	8.54914	22.577	13.7031
ENSG00000104093	DMXL2	0.287721	1.22071	0.00596756	0.031546	34.8427	18.9232	42.5328	24.1549
ENSG00000111802	TDP2	0.287433	1.22047	0.0143784	0.0594916	53.6094	37.211	65.4285	60.0706
ENSG00000154451	GBP5	0.287371	1.22041	0.186696	0.352484	35.8706	41.2252	43.777	55.3942
ENSG00000067182	TNFRSF1A	0.287238	1.2203	0.00137154	0.0106744	156.147	71.9626	190.547	80.8471
ENSG00000141644	MBD1	0.287213	1.22028	3.04517e-06	0.000112111	49.8213	13.3932	60.7959	18.6753
ENSG00000166912	MTMR10	0.287157	1.22023	0.000468774	0.00480262	21.5527	7.99918	26.2994	11.2985
ENSG00000110799	VWF	0.28705	1.22014	0.0961185	0.224261	201.393	169.716	245.728	218.823
ENSG00000130762	ARHGEF16	0.287014	1.22011	0.0139002	0.0581748	39.1205	22.9318	47.7314	29.203
ENSG00000140521	POLG	0.286934	1.22004	1.14041e-05	0.000300589	45.0375	13.5102	54.9478	16.2063
ENSG00000204618	RNF39	0.286888	1.22001	0.165323	0.325133	8.90836	9.70376	10.8682	11.4018
ENSG00000211973	IGHV1-69	0.286877	1.22	0.346215	0.529635	13.3536	20.4793	16.2914	30.3418
ENSG00000104728	ARHGEF10	0.286668	1.21982	0.0211632	0.0777393	27.6888	16.2697	33.7753	23.4481
ENSG00000207650	MIR570	0.28636	1.21956	0.116711	0.257645	0.558521	0.52217	0.681149	0.524713
ENSG00000077463	SIRT6	0.286097	1.21934	0.000246231	0.00297695	17.2626	6.76528	21.0489	7.81079
ENSG00000189343	RPS2P46	0.286046	1.21929	0.103438	0.236723	5.68158	5.12002	6.92751	7.2718
ENSG00000128791	TWSG1	0.286017	1.21927	0.00883393	0.0416849	52.332	28.0675	63.8068	36.1414
ENSG00000100084	HIRA	0.285941	1.21921	0.000504262	0.00508854	14.6827	6.63995	17.9012	6.89625
ENSG00000072778	ACADVL	0.285889	1.21916	0.0020557	0.0144736	229.936	101.639	280.329	134.411
ENSG00000116701	NCF2	0.285784	1.21907	0.0501899	0.142033	39.5581	26.2442	48.2242	36.1965
ENSG00000169129	AFAP1L2	0.285716	1.21902	0.115206	0.255013	21.0683	26.652	25.6826	26.0309
ENSG00000118162	KPTN	0.28529	1.21866	0.00689809	0.035115	8.43638	5.97964	10.281	4.81256
ENSG00000277443	MARCKS	0.285208	1.21859	0.0111637	0.0494802	149.685	100.304	182.404	87.3605
ENSG00000108106	UBE2S	0.285203	1.21858	0.0887675	0.211572	19.2909	19.957	23.5075	20.03
ENSG00000159403	C1R	0.285019	1.21843	0.0181786	0.0696014	272.206	166.623	331.663	195.539
ENSG00000135540	NHSL1	0.285007	1.21842	0.0578201	0.156895	21.9431	19.7358	26.7359	22.9371
ENSG00000129932	DOHH	0.284929	1.21835	0.00438071	0.0252383	10.5154	5.52088	12.8114	4.78346
ENSG00000118523	CCN2	0.284765	1.21821	0.0652182	0.171055	174.199	137.217	212.211	171.549
ENSG00000123643	SLC36A1	0.284718	1.21817	0.00782685	0.0384537	16.3605	8.41328	19.9299	11.9815
ENSG00000114450	GNB4	0.284664	1.21813	0.0286634	0.0960467	32.8238	22.7493	39.9835	26.1064
ENSG00000168496	FEN1	0.284425	1.21792	0.0181855	0.0696014	32.7957	20.4335	39.9427	24.2378
ENSG00000103042	SLC38A7	0.284374	1.21788	0.00131637	0.0104042	26.505	13.4735	32.2799	13.5534
ENSG00000167302	TEPSIN	0.28431	1.21783	0.00294694	0.018874	13.4131	6.2756	16.3348	7.36782
ENSG00000183801	OLFML1	0.284209	1.21774	0.0374067	0.115979	9.02671	5.89792	10.9922	7.85648
ENSG00000067141	NEO1	0.284132	1.21768	0.0486397	0.13905	55.8477	37.8154	68.0045	56.1326
ENSG00000211968	IGHV1-58	0.284114	1.21766	0.350272	0.534018	4.97083	8.77571	6.05279	11.2571
ENSG00000174705	SH3PXD2B	0.284067	1.21762	0.0238724	0.0845871	60.059	36.581	73.1292	45.6266
ENSG00000188191	PRKAR1B	0.283938	1.21751	0.0337539	0.107878	23.3919	20.1643	28.4799	17.6975
ENSG00000211592	IGKC	0.283856	1.21744	0.25155	0.42869	3060.25	4068.66	3725.68	4319.85
ENSG00000211938	IGHV3-7	0.283708	1.21732	0.270642	0.448959	3.33215	4.259	4.0563	5.81765
ENSG00000137496	IL18BP	0.283661	1.21728	0.0274386	0.0931717	23.4262	15.6672	28.5162	19.6162
ENSG00000109881	CCDC34	0.283516	1.21716	0.0470535	0.135749	12.8806	9.66965	15.6777	15.6067
ENSG00000184669	OR7E14P	0.283289	1.21697	0.0518345	0.145675	3.12739	2.41243	3.80592	2.46035
ENSG00000169710	FASN	0.28325	1.21693	0.0748515	0.188666	312.681	264.05	380.511	363.954
ENSG00000111669	TPI1	0.283168	1.21686	0.00274153	0.0178999	510.249	206.897	620.904	322.177
ENSG00000131435	PDLIM4	0.283162	1.21686	0.174252	0.335823	21.1237	24.4563	25.7046	30.4689
ENSG00000102393	GLA	0.282647	1.21642	0.00858913	0.0408109	28.2843	16.4785	34.4057	24.393
ENSG00000139508	SLC46A3	0.282627	1.21641	0.0429328	0.127073	22.8419	14.4663	27.7851	27.1723
ENSG00000146013	GFRA3	0.282447	1.21626	0.500182	0.669942	29.2519	58.2305	35.5778	98.9664
ENSG00000105519	CAPS	0.282423	1.21624	0.166219	0.326159	42.8294	43.4986	52.0907	63.7564
ENSG00000150687	PRSS23	0.282299	1.21613	0.0667247	0.173825	137.408	114.223	167.107	131.762
ENSG00000145604	SKP2	0.282216	1.21606	0.0670658	0.174395	20.7363	18.1688	25.2166	34.9616
ENSG00000132361	CLUH	0.281942	1.21583	0.00455355	0.0261265	77.6578	36.2463	94.4188	44.9008
ENSG00000074842	MYDGF	0.281844	1.21575	0.0012373	0.00994459	110.05	44.6346	133.793	69.1071
ENSG00000131584	ACAP3	0.281541	1.21549	0.019477	0.0732665	43.1287	27.1824	52.4226	27.5913
ENSG00000226084	AC113935.1	0.281371	1.21535	0.0585968	0.15825	11.4139	7.62012	13.8719	21.4225
ENSG00000163795	ZNF513	0.281305	1.21529	0.00122672	0.00990139	18.91	9.04884	22.9812	8.3683
ENSG00000180535	BHLHA15	0.281245	1.21524	0.169913	0.330665	2.19069	2.9735	2.66222	2.50372
ENSG00000159189	C1QC	0.281227	1.21523	0.0932934	0.219538	187.855	150.437	228.287	181.479
ENSG00000102901	CENPT	0.281037	1.21507	0.00866158	0.0410355	24.1587	13.6758	29.3544	14.8526
ENSG00000147883	CDKN2B	0.281029	1.21506	0.0970265	0.225854	23.4347	17.5722	28.4746	23.4611
ENSG00000127511	SIN3B	0.280914	1.21496	0.00107362	0.00902298	48.8776	18.5099	59.3846	28.1752
ENSG00000186517	ARHGAP30	0.280649	1.21474	0.0309144	0.101445	37.412	22.1429	45.4459	28.8201
ENSG00000165457	FOLR2	0.280581	1.21468	0.141102	0.291845	19.9222	19.9554	24.1992	25.325
ENSG00000172243	CLEC7A	0.280324	1.21447	0.069257	0.178467	23.2434	14.3736	28.2283	22.7427
ENSG00000047621	C12orf4	0.279747	1.21398	0.000165004	0.00223391	17.2232	6.36461	20.9087	7.79608
ENSG00000230715	AC018638.2	0.279688	1.21393	0.0556089	0.152968	5.65258	4.24871	6.86185	4.54132
ENSG00000100162	CENPM	0.279648	1.2139	0.059048	0.159108	7.91198	6.28934	9.60434	6.50849
ENSG00000029993	HMGB3	0.279469	1.21375	0.192702	0.360483	294.804	263.754	357.818	559.434
ENSG00000011028	MRC2	0.279165	1.21349	0.041831	0.125224	128.83	96.5267	156.335	99.9084
ENSG00000177169	ULK1	0.278944	1.21331	0.00658626	0.0339799	66.8208	34.9613	81.0742	41.4177
ENSG00000227766	AL671277.1	0.278833	1.21321	0.283884	0.46358	9.40468	12.0328	11.4099	12.1672
ENSG00000188522	FAM83G	0.278633	1.21304	0.015807	0.0634785	26.9042	17.3764	32.636	16.1966
ENSG00000100348	TXN2	0.278515	1.21295	0.00163467	0.0121541	62.3761	25.4469	75.6588	50.4581
ENSG00000122970	IFT81	0.278488	1.21292	0.0140315	0.0585313	19.2344	9.84234	23.3298	17.5105
ENSG00000100450	GZMH	0.278451	1.21289	0.185308	0.35114	4.70014	4.85022	5.70077	8.24708
ENSG00000070047	PHRF1	0.277969	1.21249	0.000847942	0.0075078	53.439	19.9328	64.7941	21.3175
ENSG00000127415	IDUA	0.277855	1.21239	0.057719	0.15677	21.0951	14.4977	25.5755	25.9532
ENSG00000065308	TRAM2	0.277812	1.21235	0.00561914	0.0303508	48.5714	23.2065	58.8857	27.6781
ENSG00000079215	SLC1A3	0.277802	1.21235	0.113684	0.252722	14.4406	12.4956	17.507	18.4285
ENSG00000158941	CCAR2	0.277377	1.21199	0.000440707	0.00457669	69.9779	29.0358	84.8124	29.9098
ENSG00000172890	NADSYN1	0.277373	1.21199	0.000515479	0.00517429	60.9615	22.1023	73.8845	27.8235
ENSG00000169696	ASPSCR1	0.277285	1.21191	0.0137656	0.0577175	40.7338	21.2428	49.3657	35.7406
ENSG00000139329	LUM	0.277116	1.21177	0.0794274	0.196001	526.983	379.77	638.582	601.059
ENSG00000167670	CHAF1A	0.277076	1.21174	0.0139783	0.0583946	18.5772	10.8516	22.5107	13.1981
ENSG00000127328	RAB3IP	0.277029	1.2117	0.0723909	0.184172	37.5018	30.2706	45.4408	74.7032
ENSG00000145214	DGKQ	0.27679	1.2115	0.00739656	0.0369148	28.7769	14.5373	34.8631	17.7624
ENSG00000140307	GTF2A2	0.276743	1.21146	0.00400043	0.023571	36.0117	16.1091	43.6266	45.5901
ENSG00000128973	CLN6	0.276456	1.21122	0.000759005	0.00696905	42.4341	18.5906	51.3968	20.8947
ENSG00000144591	GMPPA	0.276431	1.2112	0.000109724	0.00162634	52.1696	18.701	63.1875	22.9321
ENSG00000003056	M6PR	0.276395	1.21116	0.000577585	0.0056535	72.1453	24.7401	87.3799	34.8264
ENSG00000126561	STAT5A	0.276314	1.2111	0.0040537	0.0237988	32.1647	12.5734	38.9545	18.7506
ENSG00000168765	GSTM4	0.276278	1.21107	0.00834749	0.0400968	13.4087	6.6992	16.2388	9.72311
ENSG00000146674	IGFBP3	0.276205	1.211	0.163035	0.322091	294.643	317.056	356.814	414.843
ENSG00000124357	NAGK	0.276175	1.21098	0.000102931	0.00154086	60.0159	18.6066	72.6781	28.8356
ENSG00000254174	IGHV1-12	0.27615	1.21096	0.362368	0.546188	0.890692	2.1908	1.07859	1.77734
ENSG00000257704	INAFM1	0.276024	1.21085	0.00471817	0.0268437	7.5448	3.83732	9.13564	3.97839
ENSG00000110955	ATP5F1B	0.275834	1.21069	0.000340382	0.00377529	441.255	140.679	534.225	241.636
ENSG00000138180	CEP55	0.275683	1.21057	0.120298	0.262666	22.1384	17.924	26.8001	21.9843
ENSG00000027001	MIPEP	0.275653	1.21054	0.00155997	0.0117595	15.0058	7.26229	18.1651	7.03071
ENSG00000181045	SLC26A11	0.275624	1.21052	0.00533689	0.0292134	23.4409	9.43772	28.3756	20.0047
ENSG00000129911	KLF16	0.275607	1.2105	0.00482571	0.0272786	19.3449	11.7498	23.4171	9.85217
ENSG00000135916	ITM2C	0.274925	1.20993	0.0345097	0.109588	145.554	124.604	176.11	137.151
ENSG00000087086	FTL	0.274876	1.20989	0.0515195	0.145004	4215.49	3721.54	5100.28	4620.38
ENSG00000169228	RAB24	0.274829	1.20985	0.014604	0.0599982	7.76009	4.56781	9.38856	5.06626
ENSG00000063245	EPN1	0.274811	1.20984	0.000195743	0.00252717	123.911	40.5823	149.912	50.8798
ENSG00000215041	NEURL4	0.274549	1.20962	0.00248371	0.0166353	20.0606	8.70319	24.2656	9.69985
ENSG00000104814	MAP4K1	0.274524	1.20959	0.068495	0.177023	13.346	9.61155	16.1432	12.484
ENSG00000185551	NR2F2	0.27438	1.20947	0.0220827	0.0801622	50.4506	30.4777	61.0187	40.8265
ENSG00000099949	LZTR1	0.274315	1.20942	0.000631316	0.00604278	47.5401	19.5482	57.496	21.1133
ENSG00000162129	CLPB	0.274233	1.20935	0.00323535	0.0201644	15.4599	5.77838	18.6965	11.7332
ENSG00000136732	GYPC	0.274192	1.20932	0.0214915	0.0786769	17.3914	9.33384	21.0317	13.2243
ENSG00000100234	TIMP3	0.274146	1.20928	0.165556	0.325269	11.1105	11.0988	13.4356	13.0423
ENSG00000274012	RN7SL2	0.274114	1.20925	0.502127	0.671286	327.095	1505.94	395.54	2016.66
ENSG00000182492	BGN	0.273996	1.20915	0.0502372	0.142069	597.742	411.728	722.761	557.813
ENSG00000180096	SEPTIN1	0.273937	1.2091	0.0557747	0.153218	12.8418	8.82172	15.527	11.6193
ENSG00000185485	SDHAP1	0.273811	1.209	0.0229156	0.0823912	6.79699	3.81158	8.21754	4.73309
ENSG00000140983	RHOT2	0.273797	1.20899	0.00291972	0.0187417	73.1808	33.3042	88.4746	37.8293
ENSG00000171680	PLEKHG5	0.273637	1.20885	0.0495506	0.140607	20.967	16.2374	25.346	15.4728
ENSG00000100599	RIN3	0.273501	1.20874	0.00909154	0.0427003	33.533	16.3416	40.5326	21.1202
ENSG00000148459	PDSS1	0.27349	1.20873	0.00824771	0.0397861	5.33591	2.63537	6.44966	3.65823
ENSG00000197093	GAL3ST4	0.273369	1.20863	0.0601337	0.161522	11.8591	10.3747	14.3332	10.0181
ENSG00000198286	CARD11	0.273255	1.20853	0.159225	0.317011	33.6623	29.1308	40.6819	39.7363
ENSG00000162302	RPS6KA4	0.27317	1.20846	0.00064396	0.00613482	47.3823	20.3232	57.2597	19.7804
ENSG00000175482	POLD4	0.273148	1.20844	0.00412887	0.0241284	23.3969	10.4211	28.2738	14.4164
ENSG00000147874	HAUS6	0.272913	1.20825	0.0072399	0.0364969	18.3603	8.878	22.1838	13.4131
ENSG00000178573	MAF	0.272562	1.20795	0.016777	0.0660035	40.2611	25.8227	48.6335	26.7197
ENSG00000186834	HEXIM1	0.272556	1.20795	0.00285644	0.018408	49.588	22.7758	59.8996	28.7838
ENSG00000104946	TBC1D17	0.272521	1.20792	0.00031587	0.00357287	40.915	14.8676	49.4219	17.6432
ENSG00000186111	PIP5K1C	0.2722	1.20765	0.000451077	0.00465053	52.6982	17.2821	63.6409	24.5528
ENSG00000196975	ANXA4	0.271946	1.20744	0.0187994	0.0712764	137.073	64.5355	165.507	124.859
ENSG00000169299	PGM2	0.270906	1.20657	0.0120416	0.0520372	24.7929	11.8028	29.9143	19.3182
ENSG00000152284	TCF7L1	0.270903	1.20656	0.14016	0.290764	27.4496	25.639	33.1196	33.8495
ENSG00000218891	ZNF579	0.270844	1.20651	0.00990859	0.0452539	10.4526	5.57037	12.6113	6.12584
ENSG00000167716	WDR81	0.270644	1.20635	0.0054312	0.0295874	43.221	22.2711	52.1396	19.728
ENSG00000146067	FAM193B	0.270484	1.20621	0.0335834	0.107574	37.0157	21.0597	44.6488	28.3927
ENSG00000159921	GNE	0.270279	1.20604	0.00764219	0.0378232	26.0111	11.2967	31.3705	20.1739
ENSG00000111252	SH2B3	0.270214	1.20599	0.00687199	0.0350447	34.8599	16.2871	42.0405	20.8639
ENSG00000137876	RSL24D1	0.27016	1.20594	0.0378923	0.116819	84.3462	48.3003	101.717	192.223
ENSG00000213928	IRF9	0.270112	1.2059	0.0870483	0.208671	9.14382	9.87702	11.0265	8.10587
ENSG00000230733	AC092171.2	0.269778	1.20562	0.0722077	0.18387	11.9931	8.98627	14.4592	10.855
ENSG00000072954	TMEM38A	0.269464	1.20536	0.0296721	0.0984155	7.61307	3.83467	9.17649	7.99066
ENSG00000145014	TMEM44	0.269359	1.20527	0.00612527	0.0321872	13.5234	7.18532	16.2993	8.00817
ENSG00000174099	MSRB3	0.269346	1.20526	0.0664314	0.17318	21.8828	15.4138	26.3745	22.8947
ENSG00000065802	ASB1	0.269335	1.20525	0.000180359	0.00236602	23.4952	8.12045	28.3177	11.6135
ENSG00000102100	SLC35A2	0.26931	1.20523	0.00980576	0.0449631	58.2967	22.1285	70.261	85.6091
ENSG00000133265	HSPBP1	0.269018	1.20499	0.00264288	0.0174152	37.077	16.6305	44.6773	20.0292
ENSG00000204149	AGAP6	0.268979	1.20495	0.0420507	0.125602	6.64788	4.08384	8.01039	4.81149
ENSG00000205593	DENND6B	0.268912	1.2049	0.018121	0.0694709	13.6622	8.43042	16.4615	9.54722
ENSG00000140691	ARMC5	0.268786	1.20479	0.0057855	0.0308756	13.5056	7.26096	16.2715	7.4283
ENSG00000215021	PHB2	0.268642	1.20467	0.00368329	0.0221401	161.129	69.2877	194.108	111.376
ENSG00000215788	TNFRSF25	0.268375	1.20445	0.131168	0.278204	15.6432	13.3474	18.8415	15.5287
ENSG00000087074	PPP1R15A	0.268282	1.20437	0.00693408	0.0352358	76.6579	38.1819	92.3247	57.9251
ENSG00000105771	SMG9	0.268209	1.20431	2.37251e-05	0.000529892	35.0853	10.5344	42.2536	12.8619
ENSG00000104691	UBXN8	0.268123	1.20424	0.00927684	0.0433565	8.61428	4.81473	10.3737	5.19542
ENSG00000105221	AKT2	0.268123	1.20424	0.00029838	0.00343288	101.97	33.3939	122.797	58.5111
ENSG00000242125	SNHG3	0.268078	1.2042	0.0533859	0.148717	32.1824	22.6171	38.7542	28.9163
ENSG00000167657	DAPK3	0.268007	1.20414	0.00208622	0.0146433	44.8574	19.7085	54.0147	20.881
ENSG00000265298	AC132812.1	0.267933	1.20408	0.141016	0.291719	9.29395	9.67866	11.1907	9.5782
ENSG00000169136	ATF5	0.267757	1.20393	0.0144661	0.0597328	47.2478	37.0213	56.8833	33.2956
ENSG00000174775	HRAS	0.267489	1.20371	0.00208988	0.014651	24.7714	11.3996	29.8176	12.1142
ENSG00000111667	USP5	0.267465	1.20369	0.000332742	0.00371584	85.5543	30.9886	102.981	35.5048
ENSG00000122490	SLC66A2	0.267053	1.20335	0.00140304	0.0108123	44.9539	22.0532	54.0951	17.893
ENSG00000072786	STK10	0.267024	1.20332	0.0100707	0.0457735	38.5907	18.7258	46.4371	23.4598
ENSG00000100395	L3MBTL2	0.266917	1.20323	1.43939e-06	6.19918e-05	33.5114	9.09839	40.322	9.49077
ENSG00000171067	C11orf24	0.266879	1.2032	0.00316863	0.0198948	49.121	25.6593	59.1024	27.79
ENSG00000104886	PLEKHJ1	0.266676	1.20303	0.0013601	0.0106432	39.2293	19.4023	47.1942	17.9504
ENSG00000167508	MVD	0.266559	1.20294	0.00628446	0.0327809	35.1669	15.688	42.3035	21.0053
ENSG00000088986	DYNLL1	0.265675	1.2022	0.000896169	0.00786163	129.887	55.3124	156.15	69.2122
ENSG00000137491	SLCO2B1	0.265608	1.20214	0.100602	0.231907	88.5298	80.3903	106.425	80.0679
ENSG00000221829	FANCG	0.265526	1.20207	0.00632023	0.0329223	17.2314	8.17286	20.7135	11.2288
ENSG00000137440	FGFBP1	0.265449	1.20201	0.422876	0.603286	10.4053	19.3686	12.5073	18.4468
ENSG00000207554	MIR647	0.265318	1.2019	0.136287	0.285559	0.627023	0.537423	0.753619	0.573629
ENSG00000137996	RTCA	0.265195	1.2018	7.95733e-05	0.00127731	30.5964	10.1423	36.7707	11.5523
ENSG00000239900	ADSL	0.265062	1.20169	0.00265775	0.0174829	50.5541	21.6525	60.7503	32.0304
ENSG00000247134	AC090204.1	0.264794	1.20146	0.170339	0.331132	3.51293	3.20078	4.22065	4.08417
ENSG00000105835	NAMPT	0.26475	1.20143	0.146288	0.299531	249.347	298.029	299.572	314.645
ENSG00000135052	GOLM1	0.264743	1.20142	0.0438359	0.12911	270.603	167.306	325.108	252.928
ENSG00000134440	NARS1	0.264721	1.2014	0.000157687	0.00215273	129.425	43.3322	155.491	55.1355
ENSG00000067225	PKM	0.264685	1.20137	0.00495949	0.0278009	1239.67	578.934	1489.31	789.804
ENSG00000262655	SPON1	0.264676	1.20137	0.147423	0.300714	48.8161	53.1017	58.6461	71.0921
ENSG00000132635	PCED1A	0.264408	1.20114	0.0180218	0.0692302	28.3606	16.9393	34.0651	17.3855
ENSG00000141293	SKAP1	0.264352	1.2011	0.152444	0.307818	11.2906	10.5096	13.5611	13.7562
ENSG00000126391	FRMD8	0.263908	1.20073	0.000161286	0.00219399	47.9738	16.4077	57.6035	18.5062
ENSG00000146433	TMEM181	0.263754	1.2006	0.00824448	0.0397861	60.5011	30.1384	72.6375	58.884
ENSG00000103769	RAB11A	0.263561	1.20044	0.000216235	0.00269421	134.165	36.3798	161.057	68.327
ENSG00000104894	CD37	0.263289	1.20021	0.0780549	0.193828	33.8999	22.2407	40.687	36.3741
ENSG00000100522	GNPNAT1	0.263235	1.20017	0.0261425	0.0904409	39.3741	19.1283	47.2555	33.4077
ENSG00000141985	SH3GL1	0.262924	1.19991	0.000323848	0.00364505	76.2631	26.4179	91.5087	31.7064
ENSG00000135363	LMO2	0.262871	1.19986	0.0246728	0.0868036	11.0404	8.35933	13.247	8.05433
ENSG00000166123	GPT2	0.262869	1.19986	0.163907	0.32331	68.6761	97.6903	82.4018	84.6376
ENSG00000115221	ITGB6	0.262743	1.19976	0.164491	0.324125	176.087	149.43	211.262	205.088
ENSG00000159322	ADPGK	0.26268	1.19971	5.01715e-05	0.0009089	66.865	20.6256	80.2183	27.5484
ENSG00000110619	CARS1	0.262458	1.19952	9.58667e-05	0.00146512	53.166	16.9372	63.7737	22.2739
ENSG00000155254	MARVELD1	0.262366	1.19944	0.0163404	0.0649575	53.8478	29.7479	64.5875	34.7445
ENSG00000023697	DERA	0.262295	1.19938	0.00684825	0.0349548	41.3293	18.2425	49.5697	32.4743
ENSG00000105245	NUMBL	0.261994	1.19914	0.02379	0.0844403	22.9047	14.9897	27.4658	14.1463
ENSG00000250786	SNHG18	0.261942	1.19909	0.222988	0.395549	7.26207	8.31275	8.70788	10.6261
ENSG00000089693	MLF2	0.261873	1.19903	0.000754625	0.0069512	172.941	58.926	207.362	78.7694
ENSG00000177105	RHOG	0.261788	1.19896	0.000264554	0.00314845	52.9289	15.9376	63.4598	23.8995
ENSG00000185453	ZSWIM9	0.261631	1.19883	0.0197267	0.0738168	8.18434	4.63454	9.81165	3.86082
ENSG00000220842	RPL21P16	0.261507	1.19873	0.0957311	0.223843	2.76218	2.29683	3.31111	3.18749
ENSG00000214110	LDHAP4	0.261314	1.19857	0.107973	0.243729	2.92048	2.3547	3.5004	3.52933
ENSG00000147689	FAM83A	0.26114	1.19843	0.308695	0.492103	123.873	172.477	148.453	208.898
ENSG00000185585	OLFML2A	0.261132	1.19842	0.0848518	0.204661	23.2654	18.4127	27.8816	23.3466
ENSG00000171608	PIK3CD	0.260996	1.19831	0.0269655	0.0921848	31.4085	18.3483	37.637	21.5
ENSG00000144647	POMGNT2	0.260959	1.19827	0.0049689	0.0278175	15.0556	6.93593	18.0408	7.17012
ENSG00000093000	NUP50	0.260354	1.19777	0.000220573	0.00274227	53.0095	19.2634	63.4933	21.2251
ENSG00000138111	MFSD13A	0.260299	1.19773	0.0215372	0.078733	16.2831	8.51233	19.5028	12.2495
ENSG00000174327	SLC16A13	0.260206	1.19765	0.0206756	0.0763165	7.31319	3.89532	8.75863	5.45441
ENSG00000099194	SCD	0.260202	1.19765	0.108058	0.243759	408.21	323.706	488.891	403.447
ENSG00000142945	KIF2C	0.259871	1.19737	0.172578	0.333581	22.9436	25.8117	27.472	27.4386
ENSG00000116132	PRRX1	0.259689	1.19722	0.116887	0.257834	43.1855	45.9262	51.7026	46.5227
ENSG00000228232	GAPDHP1	0.259667	1.1972	0.31947	0.502704	5.28437	7.69943	6.32646	8.8437
ENSG00000123352	SPATS2	0.259587	1.19714	0.00590253	0.0313474	33.5129	14.4482	40.1195	22.3091
ENSG00000109846	CRYAB	0.259413	1.19699	0.129119	0.275496	9.90706	12.6248	11.8587	12.5247
ENSG00000175591	P2RY2	0.259372	1.19696	0.0789157	0.194949	7.71852	4.99119	9.23875	7.37409
ENSG00000117616	RSRP1	0.259339	1.19693	0.073345	0.186037	52.2443	34.1082	62.5328	39.0153
ENSG00000131323	TRAF3	0.259114	1.19674	0.000848961	0.007511	31.5141	12.4361	37.7143	12.5634
ENSG00000215193	PEX26	0.259072	1.19671	5.41301e-05	0.000959297	49.2521	14.8042	58.9404	18.6443
ENSG00000173762	CD7	0.258901	1.19657	0.181411	0.345463	13.2564	17.0923	15.8622	18.745
ENSG00000136960	ENPP2	0.258817	1.1965	0.0649736	0.170745	55.1467	38.5539	65.9829	52.6723
ENSG00000139514	SLC7A1	0.258654	1.19636	0.0281382	0.0948286	48.0435	27.5623	57.4775	34.1028
ENSG00000246705	H2AJ	0.258506	1.19624	0.0368344	0.114614	35.4247	23.3809	42.3764	23.4267
ENSG00000110031	LPXN	0.258387	1.19614	0.0288228	0.0964395	23.0968	10.9225	27.627	17.7585
ENSG00000108465	CDK5RAP3	0.258124	1.19592	0.0115064	0.0504476	113.387	55.0792	135.602	68.7723
ENSG00000110876	SELPLG	0.257998	1.19582	0.0521269	0.146173	35.5569	21.1981	42.5196	29.818
ENSG00000104969	SGTA	0.257954	1.19578	9.52593e-05	0.00146325	66.8711	24.1264	79.9632	22.987
ENSG00000243290	IGKV1-12	0.257638	1.19552	0.365936	0.549458	3.33966	7.50439	3.99263	7.35691
ENSG00000138018	SELENOI	0.257582	1.19547	0.0123193	0.0529567	52.7815	26.1551	63.099	36.3102
ENSG00000072422	RHOBTB1	0.257448	1.19536	0.0181408	0.0695237	20.8921	13.6641	24.9736	12.7742
ENSG00000135698	MPHOSPH6	0.257401	1.19532	0.00294086	0.0188456	14.4151	6.91738	17.2307	8.44203
ENSG00000170035	UBE2E3	0.257377	1.1953	0.00364138	0.0219657	43.3747	18.5666	51.8459	25.5177
ENSG00000100239	PPP6R2	0.25731	1.19525	0.000731331	0.0067749	55.3409	20.2423	66.1461	21.7292
ENSG00000139192	TAPBPL	0.257175	1.19514	0.029515	0.0980653	36.2613	23.9446	43.3372	23.9457
ENSG00000022267	FHL1	0.257147	1.19511	0.180801	0.345105	33.3117	35.0818	39.8112	42.7987
ENSG00000089154	GCN1	0.256963	1.19496	0.00352058	0.0214181	142.751	58.2183	170.582	75.2853
ENSG00000124802	EEF1E1	0.256688	1.19473	0.00939768	0.0437243	11.2675	5.58729	13.4616	8.115
ENSG00000117399	CDC20	0.256529	1.1946	0.191263	0.358615	35.5162	37.66	42.4277	40.9053
ENSG00000068028	RASSF1	0.256412	1.1945	0.000983361	0.00842128	26.168	9.7186	31.2577	11.9725
ENSG00000110074	FOXRED1	0.25639	1.19449	0.00247497	0.0165963	25.449	10.382	30.3985	13.8812
ENSG00000176971	FIBIN	0.255936	1.19411	0.175345	0.337075	7.65605	7.84679	9.14217	9.86456
ENSG00000159214	CCDC24	0.255895	1.19408	0.0267908	0.0919515	15.4789	10.4051	18.483	10.733
ENSG00000204381	LAYN	0.255881	1.19406	0.0977377	0.226954	9.11186	11.3745	10.8801	9.27274
ENSG00000164932	CTHRC1	0.255869	1.19406	0.195018	0.362738	67.7982	67.0257	80.9547	83.087
ENSG00000120699	EXOSC8	0.255867	1.19405	0.00298747	0.0190694	19.5091	8.30691	23.2949	13.119
ENSG00000173706	HEG1	0.255696	1.19391	0.0582687	0.157663	71.1725	50.8407	84.9736	50.7545
ENSG00000196405	EVL	0.255591	1.19382	0.019636	0.0735497	73.7219	35.9643	88.011	53.2993
ENSG00000172932	ANKRD13D	0.255471	1.19373	0.00588615	0.0312999	38.9546	18.8927	46.5011	19.9232
ENSG00000211890	IGHA2	0.255428	1.19369	0.317616	0.50103	265.107	381.429	316.455	410.99
ENSG00000117155	SSX2IP	0.255261	1.19355	0.0257992	0.0897429	17.8446	11.0281	21.2985	13.7661
ENSG00000089685	BIRC5	0.255236	1.19353	0.199879	0.368057	40.4207	39.0993	48.2434	48.4825
ENSG00000112715	VEGFA	0.255063	1.19339	0.0759195	0.190397	319.794	244.708	381.638	257.979
ENSG00000102753	KPNA3	0.25486	1.19322	0.0009302	0.00809413	47.5188	18.1389	56.7004	24.7653
ENSG00000168397	ATG4B	0.254796	1.19317	0.000956509	0.00825576	50.1888	19.2097	59.8837	22.1781
ENSG00000213015	ZNF580	0.254786	1.19316	0.00357139	0.0216464	13.8366	5.70512	16.5093	6.78789
ENSG00000163362	INAVA	0.254716	1.1931	0.107358	0.242724	41.7987	27.4983	49.8701	38.2263
ENSG00000187051	RPS19BP1	0.254702	1.19309	0.00412567	0.0241221	49.93	24.2134	59.5709	25.8559
ENSG00000178950	GAK	0.254686	1.19308	0.00668115	0.0342867	110.247	57.2109	131.533	58.7885
ENSG00000169641	LUZP1	0.254481	1.19291	0.0101147	0.0459119	37.3558	16.6506	44.562	26.4361
ENSG00000175084	DES	0.254446	1.19288	0.319794	0.502936	10.989	12.6491	13.1085	19.34
ENSG00000082397	EPB41L3	0.25415	1.19263	0.119605	0.261805	26.1948	23.9218	31.2407	30.398
ENSG00000105971	CAV2	0.254001	1.19251	0.152889	0.308398	83.3615	66.3041	99.4093	129.497
ENSG00000142627	EPHA2	0.253883	1.19241	0.155631	0.312072	75.1453	84.6747	89.6041	74.2162
ENSG00000118257	NRP2	0.253851	1.19239	0.0920491	0.217126	87.3228	75.8114	104.122	103.654
ENSG00000105321	CCDC9	0.253666	1.19223	0.00179957	0.0130735	25.6068	10.1611	30.5293	10.6397
ENSG00000006451	RALA	0.253523	1.19211	0.00116563	0.00951594	75.619	27.5274	90.1465	39.5613
ENSG00000154153	RETREG1	0.253493	1.19209	0.222825	0.395444	12.4507	18.4177	14.8424	14.673
ENSG00000100297	MCM5	0.253459	1.19206	0.0101097	0.0459119	57.5589	31.7407	68.6138	31.125
ENSG00000211897	IGHG3	0.25338	1.192	0.347311	0.530993	666.318	1009.42	794.249	1058.88
ENSG00000137818	RPLP1	0.253323	1.19195	0.0544421	0.150937	1163.16	627.485	1386.42	2577.17
ENSG00000110324	IL10RA	0.253294	1.19193	0.0674421	0.175095	39.1676	26.4296	46.6849	31.4992
ENSG00000159399	HK2	0.252802	1.19152	0.113333	0.252221	79.6305	78.5446	94.8812	70.3599
ENSG00000182326	C1S	0.252736	1.19146	0.0679203	0.175936	335.629	243.992	399.89	271.959
ENSG00000139679	LPAR6	0.252722	1.19145	0.0401411	0.121972	18.0888	12.2503	21.552	12.345
ENSG00000005243	COPZ2	0.252502	1.19127	0.0654483	0.171518	9.9137	7.40062	11.8099	9.04169
ENSG00000257084	MIR200CHG	0.252494	1.19126	0.123749	0.26727	2.48352	2.15086	2.95853	2.55393
ENSG00000166451	CENPN	0.252182	1.19101	0.0650752	0.170854	10.6093	7.79641	12.6358	11.6277
ENSG00000151376	ME3	0.252144	1.19098	0.0329665	0.106254	16.3096	8.73213	19.4243	12.5746
ENSG00000169660	HEXD	0.252104	1.19094	0.0539628	0.149995	30.8659	23.5519	36.7596	26.1944
ENSG00000105669	COPE	0.252058	1.19091	0.00295828	0.0189253	112.741	48.4137	134.264	57.3392
ENSG00000146242	TPBG	0.252016	1.19087	0.0548784	0.151697	39.3564	26.5545	46.8684	30.9393
ENSG00000177045	SIX5	0.251594	1.19052	0.0177951	0.0685902	9.16351	4.57234	10.9094	5.95134
ENSG00000107551	RASSF4	0.251559	1.19049	0.0481267	0.137994	62.3699	32.4329	74.2509	49.0364
ENSG00000120053	GOT1	0.251543	1.19048	0.0291034	0.0972073	55.784	29.4613	66.4097	49.5276
ENSG00000156535	CD109	0.251407	1.19037	0.245259	0.421696	32.2735	42.6207	38.4173	49.4746
ENSG00000166949	SMAD3	0.251396	1.19036	0.0181817	0.0696014	72.1101	36.2835	85.8369	57.8744
ENSG00000166986	MARS1	0.251371	1.19034	0.00437212	0.0252312	111.441	60.7421	132.652	61.7297
ENSG00000147027	TMEM47	0.251303	1.19028	0.0619934	0.164802	18.1153	11.9864	21.5623	17.4676
ENSG00000172965	MIR4435-2HG	0.251295	1.19027	0.0311497	0.101966	20.4181	15.3209	24.3032	16.2866
ENSG00000123384	LRP1	0.251205	1.1902	0.0554021	0.152731	368.501	274.079	438.59	245.789
ENSG00000114626	ABTB1	0.251174	1.19018	0.0133947	0.0564852	31.4476	14.0983	37.4282	21.34
ENSG00000152952	PLOD2	0.250945	1.18999	0.22177	0.394221	114.604	140.531	136.377	168.873
ENSG00000099814	CEP170B	0.250889	1.18994	0.026589	0.091514	83.4109	47.0312	99.254	50.5951
ENSG00000101246	ARFRP1	0.250816	1.18988	0.00625757	0.0326854	41.9405	19.5638	49.9041	25.3023
ENSG00000008838	MED24	0.250668	1.18976	0.000665277	0.00628722	81.0163	26.9544	96.3897	33.6583
ENSG00000169499	PLEKHA2	0.250612	1.18971	0.0133239	0.0562372	38.5263	21.2369	45.8352	20.9559
ENSG00000165684	SNAPC4	0.250267	1.18943	0.00953472	0.0440819	18.5416	8.49172	22.0539	9.83747
ENSG00000160161	CILP2	0.250233	1.1894	0.281319	0.460921	11.9483	14.1033	14.2113	19.1924
ENSG00000061938	TNK2	0.250219	1.18939	0.0204907	0.0758549	50.6028	26.4609	60.1863	31.7762
ENSG00000074590	NUAK1	0.250063	1.18926	0.0571717	0.155754	25.9542	16.802	30.8662	21.5528
ENSG00000158805	ZNF276	0.249818	1.18906	0.0290403	0.0970533	19.5975	11.5085	23.3026	12.417
ENSG00000196547	MAN2A2	0.249727	1.18898	0.00710568	0.0359314	49.7371	21.1416	59.1365	29.0507
ENSG00000064607	SUGP2	0.249689	1.18895	0.00822444	0.0397346	40.4634	19.8391	48.109	18.188
ENSG00000151117	TMEM86A	0.249617	1.18889	0.0311309	0.10195	10.36	5.70865	12.3169	8.22784
ENSG00000060558	GNA15	0.249555	1.18884	0.0464328	0.13457	28.166	16.266	33.4849	19.4452
ENSG00000168140	VASN	0.249531	1.18882	0.123208	0.2666	38.0366	31.668	45.2187	47.4817
ENSG00000168096	ANKS3	0.249269	1.1886	0.0219657	0.0798136	16.1789	9.01005	19.2303	10.0538
ENSG00000275832	ARHGAP23	0.249215	1.18856	0.0525399	0.146934	39.0259	25.1125	46.3846	35.878
ENSG00000132254	ARFIP2	0.24908	1.18845	0.000661988	0.00627514	60.7155	20.2873	72.1572	26.0815
ENSG00000170989	S1PR1	0.248887	1.18829	0.075962	0.190404	22.2499	18.8938	26.4394	18.3841
ENSG00000125741	OPA3	0.24884	1.18825	0.00160293	0.0120117	27.0602	9.74741	32.1543	16.0477
ENSG00000154370	TRIM11	0.248835	1.18825	0.00189	0.0135493	34.5894	13.5245	41.1008	16.9589
ENSG00000175602	CCDC85B	0.248768	1.18819	0.0459967	0.133806	13.0695	8.96232	15.529	8.20267
ENSG00000134901	POGLUT2	0.248739	1.18817	0.0723046	0.184035	5.46807	7.71349	6.49699	4.39287
ENSG00000068366	ACSL4	0.248478	1.18795	0.0644159	0.169591	92.8123	62.0054	110.257	85.8419
ENSG00000136802	LRRC8A	0.248406	1.18789	0.00748423	0.0372028	79.1616	31.1345	94.0356	48.1588
ENSG00000154734	ADAMTS1	0.247951	1.18752	0.148717	0.302551	38.4262	41.3924	45.6319	40.6317
ENSG00000111737	RAB35	0.247822	1.18741	3.18052e-05	0.000656236	50.3144	13.1587	59.7441	17.6453
ENSG00000107562	CXCL12	0.247811	1.1874	0.151013	0.305478	36.0427	32.1315	42.7972	36.2583
ENSG00000203747	FCGR3A	0.247733	1.18734	0.142656	0.294045	98.5909	90.8348	117.061	91.0688
ENSG00000126746	ZNF384	0.247608	1.18724	0.00236512	0.0160605	21.6899	8.36675	25.751	10.4613
ENSG00000211637	IGLV4-69	0.247587	1.18722	0.414169	0.594262	38.116	67.1361	45.2521	81.8008
ENSG00000139182	CLSTN3	0.247498	1.18715	0.00350981	0.0213982	81.2673	37.1661	96.4762	35.3528
ENSG00000102760	RGCC	0.247329	1.18701	0.0846104	0.204372	43.4549	28.0955	51.5813	40.505
ENSG00000163697	APBB2	0.247323	1.187	0.0216085	0.0788925	36.5357	19.8542	43.368	25.8692
ENSG00000013588	GPRC5A	0.247185	1.18689	0.167823	0.328085	563.481	420.696	668.79	585.715
ENSG00000177106	EPS8L2	0.247183	1.18689	0.0206908	0.076348	121.999	59.4556	144.799	69.3254
ENSG00000109079	TNFAIP1	0.247084	1.18681	1.07925e-05	0.000292799	80.4103	19.0064	95.4314	27.8855
ENSG00000137273	FOXF2	0.247047	1.18678	0.120143	0.262461	6.71512	5.77088	7.96933	6.67011
ENSG00000173548	SNX33	0.246952	1.1867	0.00304225	0.0192942	54.7854	22.0434	65.0137	25.276
ENSG00000132793	LPIN3	0.246893	1.18665	0.0488659	0.139436	22.5476	15.5713	26.756	15.3732
ENSG00000089351	GRAMD1A	0.246804	1.18658	0.0136822	0.0574732	129.051	67.4913	153.129	92.578
ENSG00000160179	ABCG1	0.246667	1.18646	0.0530117	0.148036	39.6545	30.1078	47.0485	27.9191
ENSG00000125148	MT2A	0.246636	1.18644	0.179409	0.342923	113.379	117.379	134.517	133.473
ENSG00000187778	MCRS1	0.246457	1.18629	0.000363792	0.00395049	55.8772	17.6921	66.2866	26.5861
ENSG00000139645	ANKRD52	0.246349	1.1862	0.0134236	0.0565743	60.9629	26.5991	72.3143	35.5087
ENSG00000165029	ABCA1	0.246336	1.18619	0.0657388	0.172082	56.2567	37.439	66.7312	54.8812
ENSG00000130158	DOCK6	0.246301	1.18616	0.00555668	0.0300989	51.6378	24.1328	61.2508	21.8321
ENSG00000162069	BICDL2	0.246291	1.18615	0.12062	0.26319	28.3874	20.0123	33.6718	26.2688
ENSG00000281490	CICP14	0.246209	1.18609	0.0832251	0.202184	6.14469	3.62371	7.28813	5.02782
ENSG00000211651	IGLV1-44	0.246188	1.18607	0.361475	0.545342	73.1263	106.526	86.7328	145.338
ENSG00000130202	NECTIN2	0.246171	1.18606	0.00665528	0.0342254	148.103	71.1958	175.659	78.7365
ENSG00000069849	ATP1B3	0.246032	1.18594	0.00709926	0.0359148	75.0203	32.3786	88.9697	44.7341
ENSG00000189129	PLAC9	0.245952	1.18587	0.121386	0.264356	4.05271	3.17108	4.806	4.11452
ENSG00000213442	RPL18AP3	0.245843	1.18579	0.169092	0.329832	10.7004	10.8748	12.6884	13.1109
ENSG00000171124	FUT3	0.245627	1.18561	0.192778	0.360566	29.5704	25.5247	35.0589	33.6178
ENSG00000140416	TPM1	0.245606	1.18559	0.0497707	0.141056	164.939	124.449	195.551	135.589
ENSG00000123143	PKN1	0.245518	1.18552	0.00195983	0.0139188	131.164	61.1158	155.498	53.7396
ENSG00000131591	C1orf159	0.245483	1.18549	0.0218879	0.0796068	13.3611	7.9347	15.8394	7.24762
ENSG00000010626	LRRC23	0.245468	1.18548	0.0549213	0.151697	12.6558	7.7315	15.0032	11.2659
ENSG00000126749	EMG1	0.244941	1.18504	0.0103396	0.0467534	18.1722	8.36547	21.5349	12.5272
ENSG00000099330	OCEL1	0.244764	1.1849	0.00945428	0.0438703	15.5884	7.13983	18.4706	9.04926
ENSG00000123146	ADGRE5	0.244597	1.18476	0.0544901	0.151019	117.99	80.491	139.791	79.526
ENSG00000152240	HAUS1	0.244398	1.1846	0.032934	0.10618	15.497	10.5713	18.3578	15.8042
ENSG00000032389	EIPR1	0.244373	1.18458	0.00116786	0.00952736	28.0375	9.08708	33.2126	14.7934
ENSG00000089057	SLC23A2	0.244362	1.18457	0.0137009	0.0575093	33.4835	14.981	39.6635	19.8393
ENSG00000134873	CLDN10	0.24432	1.18453	0.512789	0.680123	18.638	35.17	22.0773	33.9358
ENSG00000234171	RNASEH1-AS1	0.244218	1.18445	0.0512193	0.144378	4.7132	2.43979	5.58255	6.08166
ENSG00000071282	LMCD1	0.244112	1.18436	0.0314432	0.102532	30.5153	16.801	36.1412	20.1009
ENSG00000162511	LAPTM5	0.244094	1.18435	0.073753	0.186846	293.914	183.408	348.096	256.093
ENSG00000039650	PNKP	0.24405	1.18431	0.00266534	0.0175026	31.0608	13.9759	36.7857	13.1541
ENSG00000060491	OGFR	0.243866	1.18416	0.00546025	0.0296752	52.9987	21.7686	62.7591	24.3501
ENSG00000184992	BRI3BP	0.243819	1.18412	0.0177259	0.0684158	30.27	16.4883	35.8435	20.0237
ENSG00000136044	APPL2	0.243754	1.18407	0.00169725	0.0124651	34.8346	11.1642	41.2466	19.3926
ENSG00000176945	MUC20	0.243729	1.18405	0.240522	0.416552	41.392	44.6495	49.0101	53.2762
ENSG00000042493	CAPG	0.243347	1.18374	0.0382153	0.117466	211.23	112.398	250.04	172.619
ENSG00000059378	PARP12	0.243339	1.18373	0.0147859	0.0605061	57.9649	27.8472	68.6148	34.0977
ENSG00000254986	DPP3	0.243291	1.18369	0.00232373	0.0158902	64.6733	26.3945	76.5531	27.0318
ENSG00000255737	AGAP2-AS1	0.243164	1.18359	0.123565	0.26699	6.90379	5.57902	8.17123	6.17511
ENSG00000107404	DVL1	0.243084	1.18352	0.0164022	0.0651352	79.3795	36.4922	93.9472	46.9147
ENSG00000149503	INCENP	0.242934	1.1834	0.058306	0.157676	23.5517	16.7574	27.871	19.3522
ENSG00000259865	AL390728.6	0.242909	1.18338	0.0492489	0.140064	9.06296	5.4101	10.7249	6.37721
ENSG00000100577	GSTZ1	0.242837	1.18332	0.0478334	0.137339	18.9208	10.8597	22.3893	17.2477
ENSG00000089053	ANAPC5	0.242193	1.18279	0.000182569	0.00238951	111.556	34.3293	131.947	43.1027
ENSG00000125869	LAMP5	0.242155	1.18276	0.215134	0.386058	6.28826	5.74129	7.43749	8.80854
ENSG00000265415	AC099850.4	0.242074	1.18269	0.198994	0.367306	1.8836	1.75941	2.22772	2.23048
ENSG00000184436	THAP7	0.242012	1.18264	0.0278544	0.0942212	26.2696	14.5922	31.0675	42.0673
ENSG00000070669	ASNS	0.241515	1.18223	0.0879814	0.210333	40.5235	26.0499	47.9082	53.5589
ENSG00000066084	DIP2B	0.241477	1.1822	0.00595503	0.0315232	53.3613	21.1772	63.0838	29.7571
ENSG00000090013	BLVRB	0.241412	1.18215	0.0969095	0.225766	81.0902	70.4123	95.8607	89.4507
ENSG00000211772	TRBC2	0.241387	1.18213	0.181209	0.345438	25.9001	20.7461	30.6172	32.4422
ENSG00000004776	HSPB6	0.241373	1.18212	0.198484	0.366932	6.43583	5.84321	7.60791	7.80431
ENSG00000090316	MAEA	0.241189	1.18197	0.000163603	0.00221758	59.7095	18.0149	70.5747	23.4874
ENSG00000198898	CAPZA2	0.241164	1.18195	0.198753	0.367173	193.22	361.259	228.376	766.789
ENSG00000072952	MRVI1	0.241123	1.18191	0.0858252	0.206346	16.896	11.5181	19.9696	15.7822
ENSG00000275074	NUDT18	0.240847	1.18169	0.0331526	0.106613	8.24026	4.67689	9.7374	5.25829
ENSG00000102879	CORO1A	0.240578	1.18147	0.0678762	0.175936	74.6964	43.2558	88.2513	64.8484
ENSG00000168961	LGALS9	0.240305	1.18124	0.0720365	0.183673	87.3508	54.7711	103.182	63.4649
ENSG00000181274	FRAT2	0.2402	1.18116	0.0149917	0.0610855	15.1782	7.69578	17.9278	9.88844
ENSG00000222365	SNORD12B	0.239998	1.18099	0.230795	0.404346	0.224662	0.241254	0.265324	0.249445
ENSG00000163584	RPL22L1	0.239857	1.18088	0.118552	0.260349	29.551	27.0137	34.896	30.7836
ENSG00000201772	SNORA5C	0.239675	1.18073	0.162434	0.321292	0.347587	0.458643	0.410406	0.486016
ENSG00000150787	PTS	0.239546	1.18062	0.0104966	0.0473134	16.5474	8.84073	19.5362	11.7579
ENSG00000110934	BIN2	0.239504	1.18059	0.0730784	0.185659	13.6617	7.98794	16.1289	10.5557
ENSG00000185507	IRF7	0.239062	1.18023	0.0638229	0.168574	55.723	37.3442	65.7656	42.2164
ENSG00000058804	NDC1	0.238874	1.18007	0.0161898	0.0645161	34.7442	15.5765	41.0006	24.8236
ENSG00000101230	ISM1	0.23883	1.18004	0.223649	0.396291	8.05739	7.30729	9.50801	9.95441
ENSG00000002586	CD99	0.238813	1.18002	0.0168385	0.0662226	157.775	80.6291	186.178	95.4005
ENSG00000099624	ATP5F1D	0.238755	1.17997	0.0144393	0.0596619	41.5695	19.9323	49.0509	22.7878
ENSG00000211455	STK38L	0.238691	1.17992	0.0228292	0.0821405	41.1244	34.1729	48.5235	23.7152
ENSG00000101236	RNF24	0.238682	1.17991	0.0122432	0.0527545	37.5694	20.9788	44.3286	18.4775
ENSG00000164035	EMCN	0.238676	1.17991	0.175386	0.337097	12.8244	15.5949	15.1316	14.9471
ENSG00000106868	SUSD1	0.238648	1.17989	0.00740042	0.0369148	20.798	8.20026	24.5393	10.3303
ENSG00000221955	SLC12A8	0.238504	1.17977	0.0526688	0.147222	22.0964	15.2076	26.0686	12.5404
ENSG00000164251	F2RL1	0.238339	1.17963	0.169898	0.330665	30.4414	21.3942	35.9097	32.812
ENSG00000138073	PREB	0.238212	1.17953	0.000188028	0.00244137	67.6967	19.7236	79.8503	27.2407
ENSG00000128917	DLL4	0.238049	1.1794	0.0659755	0.172543	24.41	18.0786	28.7891	20.1452
ENSG00000064989	CALCRL	0.237991	1.17935	0.112605	0.250959	30.4361	23.9095	35.8948	29.9515
ENSG00000204396	VWA7	0.237958	1.17932	0.0841085	0.203634	8.70417	6.01635	10.265	6.85272
ENSG00000167552	TUBA1A	0.237864	1.17925	0.0796127	0.196215	142.439	114.84	167.97	134.884
ENSG00000161956	SENP3	0.23786	1.17924	0.000341808	0.00378376	19.8126	6.29137	23.3639	7.90547
ENSG00000265806	MIR4292	0.237853	1.17924	0.121638	0.264681	0.321924	0.219842	0.379624	0.292448
ENSG00000099284	MACROH2A2	0.237841	1.17923	0.20626	0.376166	15.36	18.682	18.1129	15.7168
ENSG00000102572	STK24	0.237662	1.17908	0.00686343	0.0350167	73.3647	30.2409	86.5029	41.6234
ENSG00000169515	CCDC8	0.237637	1.17906	0.183644	0.348567	8.83979	10.4458	10.4226	9.59978
ENSG00000185112	FAM43A	0.237606	1.17903	0.145156	0.298015	8.26612	20.7676	9.74604	6.3217
ENSG00000163935	SFMBT1	0.237535	1.17898	0.0285663	0.0958786	14.2265	7.38975	16.7727	9.3347
ENSG00000138074	SLC5A6	0.237528	1.17897	0.00192245	0.0137131	34.2931	11.1672	40.4306	17.8872
ENSG00000173744	AGFG1	0.237469	1.17892	0.00334672	0.0206428	82.964	30.9321	97.8081	52.4566
ENSG00000271605	MILR1	0.2374	1.17887	0.13908	0.28934	7.28713	6.3901	8.59054	6.32697
ENSG00000013275	PSMC4	0.237289	1.17878	0.0061343	0.0321931	94.0203	33.2875	110.829	79.1612
ENSG00000197136	PCNX3	0.237147	1.17866	0.00299032	0.0190769	86.6444	30.9995	102.124	40.0079
ENSG00000263335	AF001548.2	0.237106	1.17863	0.112978	0.251554	1.95753	1.72863	2.3072	1.64704
ENSG00000160392	C19orf47	0.237088	1.17861	0.00506499	0.0281025	15.9608	6.63344	18.8115	9.6197
ENSG00000124570	SERPINB6	0.237001	1.17854	0.00738095	0.0368983	117.296	45.8554	138.238	58.2208
ENSG00000140961	OSGIN1	0.236787	1.17837	0.338188	0.52222	23.6404	47.5003	27.857	38.3951
ENSG00000112972	HMGCS1	0.236755	1.17834	0.0555513	0.152933	57.4322	30.5955	67.6746	55.6377
ENSG00000139687	RB1	0.236639	1.17824	0.0088132	0.0416157	44.548	19.7363	52.4884	21.1874
ENSG00000168461	RAB31	0.236616	1.17823	0.046672	0.13499	134.097	74.7589	157.997	96.7271
ENSG00000161800	RACGAP1	0.236322	1.17799	0.10425	0.23839	35.5085	28.7484	41.8285	33.3182
ENSG00000105443	CYTH2	0.236238	1.17792	0.00132911	0.0104815	75.5528	26.1603	88.9949	34.5446
ENSG00000137845	ADAM10	0.2362	1.17789	0.00138717	0.0107308	111.52	35.8373	131.358	55.9736
ENSG00000234498	RPL13AP20	0.236162	1.17785	0.0422629	0.125939	2.74065	1.79518	3.22809	1.9661
ENSG00000090006	LTBP4	0.236065	1.17778	0.108155	0.243852	97.1704	104.596	114.445	80.4019
ENSG00000111530	CAND1	0.235875	1.17762	0.0492226	0.140024	142.76	103.345	168.117	253.664
ENSG00000173482	PTPRM	0.23582	1.17758	0.104692	0.238921	53.7283	40.8497	63.2691	44.8759
ENSG00000167797	CDK2AP2	0.235691	1.17747	0.0564595	0.154563	105.124	61.2679	123.781	97.5941
ENSG00000242802	AP5Z1	0.235551	1.17736	0.0133236	0.0562372	44.8798	22.801	52.8395	21.3812
ENSG00000166794	PPIB	0.235474	1.17729	0.0180686	0.0693257	266.214	138.202	313.412	164.033
ENSG00000130347	RTN4IP1	0.235344	1.17719	0.00164912	0.012206	5.45569	1.90025	6.42237	2.56333
ENSG00000142552	RCN3	0.235224	1.17709	0.179682	0.343387	42.3024	42.5474	49.7938	40.4648
ENSG00000095713	CRTAC1	0.235053	1.17695	0.386886	0.569379	23.704	31.2154	27.8984	34.9778
ENSG00000136141	LRCH1	0.235008	1.17691	0.0105172	0.047336	19.909	9.09032	23.4312	10.8099
ENSG00000103852	TTC23	0.234998	1.17691	0.0057778	0.0308717	12.0297	5.15256	14.1578	5.82946
ENSG00000100266	PACSIN2	0.234996	1.1769	0.0102621	0.0464769	116.439	57.8641	137.038	60.3284
ENSG00000122986	HVCN1	0.234458	1.17646	0.0355681	0.111887	8.72319	4.34337	10.2625	6.65876
ENSG00000116711	PLA2G4A	0.234395	1.17641	0.376332	0.559984	50.8007	85.1417	59.7627	77.8919
ENSG00000087088	BAX	0.234374	1.1764	0.00144558	0.0110505	56.0012	21.3838	65.8796	21.9434
ENSG00000114529	C3orf52	0.234347	1.17637	0.0579086	0.156986	14.4771	7.0044	17.0305	12.159
ENSG00000155760	FZD7	0.234291	1.17633	0.0689023	0.177754	17.0961	10.3535	20.1107	15.4979
ENSG00000138764	CCNG2	0.23425	1.1763	0.0220572	0.0800949	58.8503	23.1961	69.2253	49.2135
ENSG00000171552	BCL2L1	0.234167	1.17623	0.0116657	0.0508791	136.203	63.1306	160.206	75.6213
ENSG00000198146	ZNF770	0.234001	1.17609	0.0398493	0.121442	21.3215	9.72158	25.076	16.3421
ENSG00000076944	STXBP2	0.233893	1.176	0.0056326	0.0303804	63.2789	23.9873	74.4162	31.3983
ENSG00000065600	PACC1	0.233792	1.17592	0.0143613	0.0594722	11.9949	6.39332	14.105	7.00314
ENSG00000091986	CCDC80	0.233744	1.17588	0.169586	0.330352	127.1	118.391	149.455	131.815
ENSG00000141696	P3H4	0.233718	1.17586	0.0616947	0.164246	38.4021	27.8388	45.1555	28.4081
ENSG00000205208	C4orf46	0.233668	1.17582	0.0523677	0.146632	12.0931	7.95446	14.2193	12.4072
ENSG00000260257	AL035071.1	0.233574	1.17574	0.0668167	0.173983	5.91803	4.16276	6.95809	4.25184
ENSG00000001036	FUCA2	0.233532	1.17571	0.0073161	0.036735	69.3362	29.4152	81.5193	38.0786
ENSG00000134815	DHX34	0.23352	1.1757	0.0119586	0.051774	26.9248	12.7181	31.6554	14.2979
ENSG00000149091	DGKZ	0.233491	1.17568	0.00214347	0.0149553	57.5635	24.0666	67.6761	23.4273
ENSG00000078804	TP53INP2	0.233438	1.17563	0.0914282	0.21595	49.8073	46.5839	58.5552	38.3298
ENSG00000167566	NCKAP5L	0.233409	1.17561	0.0143319	0.0594366	32.4722	18.0278	38.1746	16.4733
ENSG00000154803	FLCN	0.23336	1.17557	0.00728267	0.0366639	29.4859	12.27	34.6627	14.2752
ENSG00000204348	DXO	0.233329	1.17554	0.0108511	0.0483114	15.7505	7.11187	18.5154	8.16917
ENSG00000002726	AOC1	0.232954	1.17524	0.529026	0.69312	42.7468	93.454	50.2377	73.9272
ENSG00000128951	DUT	0.232649	1.17499	0.00317188	0.0198948	38.2432	15.9086	44.9354	16.9672
ENSG00000171763	SPATA5L1	0.232485	1.17486	0.00119467	0.00968382	8.48481	2.71377	9.96844	3.73389
ENSG00000111371	SLC38A1	0.232388	1.17478	0.108514	0.244515	105.654	76.0251	124.12	83.8988
ENSG00000078401	EDN1	0.232195	1.17462	0.186126	0.351756	23.6381	20.4711	27.7658	24.683
ENSG00000108582	CPD	0.232074	1.17452	0.158197	0.315651	329.53	271.386	387.04	510.992
ENSG00000102471	NDFIP2	0.232057	1.17451	0.0196171	0.0735029	41.5963	19.5336	48.8552	30.5024
ENSG00000127951	FGL2	0.231503	1.17406	0.209288	0.379445	47.8023	39.815	56.1227	130.001
ENSG00000173264	GPR137	0.231459	1.17402	0.00578563	0.0308756	27.5282	12.7387	32.3187	10.9849
ENSG00000118785	SPP1	0.231429	1.174	0.424448	0.604622	602.799	1090.87	707.684	1149.32
ENSG00000104626	ERI1	0.231304	1.1739	0.00872904	0.041338	19.6631	10.8616	23.0825	9.09387
ENSG00000260260	SNHG19	0.230817	1.1735	0.135292	0.284016	6.07016	5.43634	7.12333	5.69657
ENSG00000234851	RPL23AP42	0.230737	1.17343	0.171512	0.332449	3.4287	2.9978	4.02336	6.34293
ENSG00000231292	IGKV1OR2-108	0.230724	1.17342	0.390867	0.572726	3.46297	5.14466	4.06354	7.70324
ENSG00000129250	KIF1C	0.230578	1.17331	0.0151778	0.0617116	136.833	63.7131	160.547	71.001
ENSG00000071575	TRIB2	0.230427	1.17318	0.120653	0.26319	52.3796	73.6284	61.4508	39.2055
ENSG00000074755	ZZEF1	0.230419	1.17318	0.0111781	0.0495054	49.3072	20.617	57.846	23.7219
ENSG00000079432	CIC	0.230399	1.17316	0.0104383	0.0471063	87.8306	32.1807	103.039	55.7831
ENSG00000140263	SORD	0.230302	1.17308	0.0617925	0.164435	23.5881	17.5026	27.6707	18.1489
ENSG00000122965	RBM19	0.229934	1.17278	0.0026174	0.0172872	30.7148	10.9449	36.0217	13.4271
ENSG00000215039	CD27-AS1	0.229915	1.17277	0.0217213	0.0791777	15.6774	8.32544	18.3859	7.66907
ENSG00000136295	TTYH3	0.22991	1.17276	0.0674338	0.175095	156.321	140.431	183.328	96.8052
ENSG00000162144	CYB561A3	0.2298	1.17267	0.00127271	0.0101435	36.4878	11.444	42.7882	16.3569
ENSG00000177548	RABEP2	0.229766	1.17264	0.0125296	0.0536384	28.6834	12.7385	33.6355	14.3603
ENSG00000183087	GAS6	0.229576	1.17249	0.12719	0.272911	100.138	133.462	117.411	81.7817
ENSG00000272666	U62317.1	0.229479	1.17241	0.244763	0.421095	4.08764	5.97375	4.79239	4.7302
ENSG00000179115	FARSA	0.229422	1.17237	0.00121617	0.00983016	55.8187	17.9935	65.4399	27.0841
ENSG00000111196	MAGOHB	0.229317	1.17228	0.00964853	0.0444779	15.8505	6.5355	18.5812	9.73311
ENSG00000103591	AAGAB	0.229275	1.17225	0.00115057	0.00943059	47.4487	15.9248	55.6216	23.0389
ENSG00000105220	GPI	0.229067	1.17208	0.0162199	0.064567	354.939	190.351	416.016	226.524
ENSG00000152253	SPC25	0.228981	1.17201	0.193483	0.361051	5.0071	5.6108	5.86835	5.46874
ENSG00000116212	LRRC42	0.228908	1.17195	0.00815796	0.0394855	31.4775	12.1916	36.89	17.447
ENSG00000101782	RIOK3	0.228794	1.17186	0.00578664	0.0308756	81.2536	29.5537	95.2174	53.1658
ENSG00000124299	PEPD	0.228442	1.17157	0.00496463	0.027816	59.5059	24.005	69.7152	32.3382
ENSG00000139372	TDG	0.228346	1.17149	0.0165056	0.0653866	24.6793	11.8992	28.9116	15.904
ENSG00000105447	GRWD1	0.228272	1.17143	0.000462551	0.00475595	37.8591	10.5796	44.3493	15.5923
ENSG00000237649	KIFC1	0.228258	1.17142	0.218556	0.390052	26.9268	34.7341	31.5425	29.566
ENSG00000071539	TRIP13	0.228105	1.1713	0.24336	0.419684	22.4583	24.8444	26.3053	25.5041
ENSG00000107672	NSMCE4A	0.227987	1.1712	0.00539209	0.0294168	25.9436	10.738	30.3851	13.0634
ENSG00000091436	MAP3K20	0.227902	1.17113	0.0460049	0.133806	60.5345	38.7795	70.8938	50.1386
ENSG00000164880	INTS1	0.227881	1.17111	0.0346739	0.110001	154.83	73.2506	181.324	94.3125
ENSG00000169062	UPF3A	0.227578	1.17087	0.00521314	0.0287429	24.7374	9.54592	28.9642	12.0745
ENSG00000130299	GTPBP3	0.227558	1.17085	0.0112289	0.0496536	16.6859	8.26094	19.5367	8.19629
ENSG00000177225	GATD1	0.227421	1.17074	0.00743046	0.0370161	49.2612	19.8558	57.6721	20.6266
ENSG00000247596	TWF2	0.227395	1.17072	0.00329854	0.0204155	44.0292	16.1486	51.5458	18.4328
ENSG00000105643	ARRDC2	0.227335	1.17067	0.0357194	0.112274	46.357	23.542	54.2687	32.538
ENSG00000139117	CPNE8	0.227307	1.17065	0.069702	0.179371	20.874	12.3682	24.4361	19.1057
ENSG00000102755	FLT1	0.227192	1.17055	0.0732173	0.185902	55.9572	37.1778	65.501	37.6934
ENSG00000178381	ZFAND2A	0.22706	1.17045	0.0887514	0.211572	17.3143	13.9852	20.2654	17.3889
ENSG00000042753	AP2S1	0.226971	1.17038	0.00435902	0.0251769	65.4692	29.0382	76.6236	29.1562
ENSG00000196510	ANAPC7	0.226967	1.17037	0.00190248	0.0136155	46.1013	17.418	53.9556	19.3625
ENSG00000167173	C15orf39	0.226932	1.17034	0.00477646	0.027054	48.4651	18.2734	56.7208	22.1061
ENSG00000119688	ABCD4	0.226852	1.17028	0.00167437	0.0123438	35.3953	12.4045	41.4223	14.3279
ENSG00000111679	PTPN6	0.226826	1.17026	0.00370758	0.022255	69.097	24.8336	80.8612	32.3009
ENSG00000263272	AC004148.1	0.226714	1.17017	0.156263	0.313079	4.45271	3.51155	5.21042	3.70143
ENSG00000099331	MYO9B	0.226481	1.16998	0.00826839	0.0398342	102.115	38.598	119.472	52.1783
ENSG00000095794	CREM	0.226085	1.16966	0.0236269	0.0841615	20.9951	11.0725	24.5571	15.3408
ENSG00000214135	AC132008.2	0.225996	1.16958	0.0446896	0.130948	10.6943	5.75681	12.5079	7.67748
ENSG00000204161	TMEM273	0.225851	1.16947	0.099673	0.230417	11.1166	7.51813	13.0005	11.1355
ENSG00000010256	UQCRC1	0.225611	1.16927	0.00124307	0.00997692	131.335	41.8222	153.567	57.7397
ENSG00000109736	MFSD10	0.225499	1.16918	0.0249849	0.0876321	97.1787	50.2691	113.62	53.2319
ENSG00000250479	CHCHD10	0.22532	1.16904	0.0429806	0.127181	23.82	12.3877	27.8464	17.4548
ENSG00000115956	PLEK	0.225272	1.169	0.132052	0.279405	38.4748	26.6119	44.977	32.3119
ENSG00000247077	PGAM5	0.225226	1.16896	0.0298247	0.0987782	54.8889	26.7077	64.1629	39.5886
ENSG00000126254	RBM42	0.22517	1.16891	0.00945508	0.0438703	70.9745	35.4037	82.9632	35.7182
ENSG00000166128	RAB8B	0.225127	1.16888	0.0237183	0.0843426	31.9022	16.4942	37.2899	18.777
ENSG00000188820	CALHM6	0.225107	1.16886	0.287644	0.468248	9.03739	10.4457	10.5635	13.0672
ENSG00000182117	NOP10	0.224906	1.1687	0.0146157	0.0600249	52.752	34.9206	61.6514	27.6458
ENSG00000100124	ANKRD54	0.224871	1.16867	0.00504841	0.0280558	21.4559	7.84245	25.0749	17.7733
ENSG00000118508	RAB32	0.224755	1.16858	0.0882399	0.210731	22.1422	18.6403	25.8749	19.7359
ENSG00000174365	SNHG11	0.224633	1.16848	0.0131619	0.0557185	8.95126	4.40487	10.4594	4.46265
ENSG00000198736	MSRB1	0.224522	1.16839	0.115047	0.25481	58.6135	50.0643	68.4834	52.7366
ENSG00000130726	TRIM28	0.224395	1.16829	0.00562888	0.0303747	266.812	101.705	311.713	140.899
ENSG00000113504	SLC12A7	0.224242	1.16816	0.100314	0.231436	166.225	121.415	194.177	162.629
ENSG00000197785	ATAD3A	0.224164	1.1681	0.0223571	0.0809781	26.6878	12.7137	31.1741	15.0019
ENSG00000152117	SMPD4BP	0.224138	1.16808	0.0710584	0.181836	19.5231	12.7227	22.8045	13.6123
ENSG00000167595	PROSER3	0.22393	1.16791	0.0396014	0.120848	13.4352	8.13104	15.6911	8.19753
ENSG00000069535	MAOB	0.223868	1.16786	0.211384	0.381367	18.4112	15.8264	21.5017	21.1802
ENSG00000140105	WARS1	0.223701	1.16773	0.188753	0.354941	336.986	369.864	393.507	522.801
ENSG00000062822	POLD1	0.223547	1.1676	0.0193264	0.0728681	32.0657	14.4333	37.4399	17.9958
ENSG00000157870	PRXL2B	0.223398	1.16748	0.0353505	0.111443	37.6302	17.4188	43.9325	27.1057
ENSG00000174028	FAM3C2	0.22335	1.16744	0.207524	0.377609	4.42896	3.17172	5.17055	13.7965
ENSG00000101104	PABPC1L	0.223314	1.16741	0.212579	0.382916	37.0697	32.6033	43.2756	35.303
ENSG00000146063	TRIM41	0.223306	1.16741	0.0129368	0.0549694	34.3157	14.8848	40.0603	17.4944
[truncated: 9,414 more rows]

## Sheet: IPA_DE_W
Ingenuity Canonical Pathways	-log(p-value)	Ratio	z-score	Molecules
Atherosclerosis Signaling	12.1	0.167	#NUM!	ALOX15B,APOD,APOE,APOL1,COL1A1,COL1A2,COL3A1,COL5A3,CXCL8,F3,ICAM1,IL1RN,IL6,MMP1,MMP13,MMP9,PDGFB,PLA2G1B,PLA2G6,PLA2G7,RBP4
Agranulocyte Adhesion and Diapedesis	10.7	0.122	#NUM!	ACKR3,ACTG2,CCL18,CCL21,CCL8,CLDN18,CLDN5,CX3CL1,CXCL1,CXCL14,CXCL3,CXCL5,CXCL8,ICAM1,IL1RN,ITGA5,ITGA6,MMP1,MMP11,MMP12,MMP13,MMP14,MMP19,MMP9
Granulocyte Adhesion and Diapedesis	10.2	0.126	#NUM!	ACKR3,CCL18,CCL21,CCL8,CLDN18,CLDN5,CX3CL1,CXCL1,CXCL14,CXCL3,CXCL5,CXCL8,ICAM1,IL1RN,MMP1,MMP11,MMP12,MMP13,MMP14,MMP19,MMP9,THY1
Hepatic Fibrosis / Hepatic Stellate Cell Activation	9.47	0.116	#NUM!	CCL21,COL16A1,COL17A1,COL1A1,COL1A2,COL3A1,COL5A2,COL5A3,COL6A1,CXCL3,CXCL8,ICAM1,IGF2,IL6,IL6R,MET,MMP1,MMP13,MMP9,PDGFB,SERPINE1,VEGFC
Tumor Microenvironment Pathway	9.22	0.118	2.683	COL1A1,COL1A2,COL3A1,CXCL8,ICAM1,IGF2,IL6,IL6R,ITGA5,MMP1,MMP11,MMP12,MMP13,MMP14,MMP19,MMP9,OSM,PDGFB,SLC16A1,SLC2A3,VEGFC
HIF1α Signaling	6.73	0.0931	2.065	CAMK1D,HK3,HMOX1,HSPA6,IGF2,IL6,IL6R,MET,MMP1,MMP11,MMP12,MMP13,MMP14,MMP19,MMP9,PDGFB,SERPINE1,SLC2A3,VEGFC
GP6 Signaling Pathway	6.11	0.113	3.207	COL16A1,COL17A1,COL1A1,COL1A2,COL3A1,COL5A2,COL5A3,COL6A1,FGA,LAMA4,LAMA5,LAMB1,LAMC2,PTK2
Inhibition of Matrix Metalloproteases	5.79	0.211	-2.121	MMP1,MMP11,MMP12,MMP13,MMP14,MMP19,MMP9,TFPI2
Axonal Guidance Signaling	5.67	0.0594	#NUM!	ADAM19,ADAMTS12,ADAMTS2,BMP1,BMP3,EFNB1,FZD4,ITGA5,ITGA6,ITGA9,ITGAX,ITGB4,MET,MMP1,MMP11,MMP12,MMP13,MMP14,MMP9,PDGFB,PLCD3,PLCH1,PTK2,SEMA3B,SEMA3F,SEMA4G,SEMA6B,SEMA7A,VEGFC
Role of Tissue Factor in Cancer	4.97	0.104	#NUM!	CXCL1,CXCL8,F3,FGA,FGR,HBEGF,ITGA6,MAPK11,MMP1,MMP13,PLAUR,VEGFC
Iron homeostasis signaling pathway	4.33	0.0902	#NUM!	BMP1,BMP3,CD163,HBA1/HBA2,HEPH,HMOX1,IL6,IL6R,PDGFB,SLC11A1,SLC39A14,TFRC
HOTAIR Regulatory Pathway	4.2	0.0818	1.732	COL1A1,COL1A2,COL3A1,FOXM1,ICAM1,MET,MMP1,MMP11,MMP12,MMP13,MMP14,MMP19,MMP9
Acute Phase Response Signaling	4.13	0.0761	1.414	APOH,C4BPA,CRABP2,FGA,HMOX1,IL1RN,IL6,IL6R,MAPK11,OSM,RBP4,SAA1,SERPINE1,SOCS3
Leukocyte Extravasation Signaling	4.01	0.0741	1.508	ACTG2,CLDN18,CLDN5,ICAM1,MAPK11,MMP1,MMP11,MMP12,MMP13,MMP14,MMP19,MMP9,PTK2,THY1
LXR/RXR Activation	3.98	0.0894	-0.302	APOD,APOE,APOH,APOL1,FGA,IL1RN,IL6,MMP9,PON3,RBP4,SAA1
FXR/RXR Activation	3.92	0.088	#NUM!	APOD,APOE,APOH,APOL1,FGA,FOXA3,IL1RN,PON3,RBP4,SAA1,SCARB1
Regulation of Cellular Mechanics by Calpain Protease	3.8	0.102	#NUM!	CAPN5,CCNE1,CDK6,ITGA5,ITGA6,ITGA9,ITGAX,ITGB4,PTK2
Hepatic Fibrosis Signaling Pathway	3.76	0.0534	2.668	COL1A1,COL1A2,COL3A1,COL5A3,CXCL8,FZD4,ICAM1,IL1RN,ITGA5,ITGA6,ITGA9,ITGAX,ITGB4,MAPK11,MMP1,MMP13,PDGFB,PTK2,RHOV,SERPINE1,TFRC,VEGFC
Role of JAK family kinases in IL-6-type Cytokine Signaling	3.69	0.2	#NUM!	IL6,IL6R,MAPK11,OSM,SOCS3
Role of IL-17A in Psoriasis	3.68	0.286	2	CXCL1,CXCL3,CXCL5,CXCL8
Osteoarthritis Pathway	3.64	0.0652	2.714	CCN4,CXCL8,FZD4,ITGA5,ITGA6,ITGA9,ITGAX,ITGB4,MMP1,MMP12,MMP13,MMP9,RBP4,SPHK1,VEGFC
Airway Pathology in Chronic Obstructive Pulmonary Disease	3.63	0.0885	#NUM!	APOD,CXCL1,CXCL3,CXCL8,IL6,LIF,MMP1,MMP9,OSM,RBP4
Apelin Liver Signaling Pathway	3.61	0.192	2.236	APLNR,COL1A1,COL1A2,COL3A1,COL5A3
Bladder Cancer Signaling	3.6	0.0877	#NUM!	CXCL8,MMP1,MMP11,MMP12,MMP13,MMP14,MMP19,MMP9,TFDP1,VEGFC
Role of IL-17A in Arthritis	3.56	0.123	#NUM!	CXCL1,CXCL3,CXCL5,CXCL8,MAPK11,MMP1,MMP13
Clathrin-mediated Endocytosis Signaling	3.38	0.0677	#NUM!	ACTG2,APOD,APOE,APOL1,HIP1,ITGA5,ITGB4,MET,MYO1E,PDGFB,RBP4,TFRC,VEGFC
Apelin Cardiac Fibroblast Signaling Pathway	2.8	0.174	-1	APLNR,IL6,SERPINE1,SPHK1
Intrinsic Prothrombin Activation Pathway	2.67	0.122	2.236	COL1A1,COL1A2,COL3A1,COL5A3,FGA
IL-17 Signaling	2.61	0.0615	2.714	CXCL1,CXCL3,CXCL5,CXCL8,IL6,LIF,MAPK11,MMP13,MMP9,OSM,VEGFC
Phospholipases	2.58	0.0968	0.816	HMOX1,PLA2G1B,PLA2G6,PLA2G7,PLCD3,PLCH1
Paxillin Signaling	2.57	0.0755	#NUM!	ACTG2,ITGA5,ITGA6,ITGA9,ITGAX,ITGB4,MAPK11,PTK2
Antioxidant Action of Vitamin C	2.55	0.0748	-0.816	HMOX1,MAPK11,PLA2G1B,PLA2G6,PLA2G7,PLCD3,PLCH1,SLC2A3
Role of IL-17F in Allergic Inflammatory Airway Diseases	2.53	0.114	1.342	CXCL1,CXCL5,CXCL8,IL6,MMP13
Systemic Lupus Erythematosus In B Cell Signaling Pathway	2.51	0.0444	1.667	CXCL8,FGR,IGHG4,IGHV1-69D,IGHV2-26,IGHV3-72,IGHV3-73,IGKV1-8,IGKV1D-16,IGKV3D-15,IGLV1-36,IGLV1-40,IGLV2-23,IL6,IL6R,ISG20,LIF,OSM,PAG1,SHE
Regulation of Actin-based Motility by Rho	2.47	0.0727	1	ACTG2,ITGA5,ITGA6,ITGA9,ITGAX,ITGB4,PIP5KL1,RHOV
FAK Signaling	2.33	0.069	#NUM!	ACTG2,CAPN5,ITGA5,ITGA6,ITGA9,ITGAX,ITGB4,PTK2
Role of Macrophages, Fibroblasts and Endothelial Cells in Rheumatoid Arthritis	2.3	0.0479	#NUM!	CXCL8,FZD4,ICAM1,IGHG4,IL1RN,IL6,IL6R,MMP1,MMP13,OSM,PDGFB,PLCD3,PLCH1,SOCS3,VEGFC
TREM1 Signaling	2.26	0.0833	1.633	CXCL3,CXCL8,ICAM1,IL6,ITGA5,ITGAX
Aryl Hydrocarbon Receptor Signaling	2.22	0.0612	0.707	ALDH3A1,CCNE1,CDK6,CHEK2,IL6,NCOA2,TFDP1,TFF1,TGM2
RHOA Signaling	2.2	0.0656	0.378	ACTG2,CDC42EP2,CDC42EP3,CDC42EP5,PIP5KL1,PTK2,RHPN2,SEMA3F
Role of MAPK Signaling in Inhibiting the Pathogenesis of Influenza	2.2	0.0811	1.633	CXCL8,IL6,MAPK11,PLA2G1B,PLA2G6,PLA2G7
Ferroptosis Signaling Pathway	2.18	0.065	0.707	ALOX15B,CHAC1,DPP4,HMOX1,SLC39A14,SLC7A11,TFAP2C,TFRC
Caveolar-mediated Endocytosis Signaling	2.17	0.08	#NUM!	ACTG2,ITGA5,ITGA6,ITGA9,ITGAX,ITGB4
Integrin Signaling	2.17	0.0537	1.897	ACTG2,CAPN5,ITGA5,ITGA6,ITGA9,ITGAX,ITGB4,PDGFB,PTK2,RHOV,TSPAN1
IL-15 Signaling	2.15	0.0491	#NUM!	CXCL8,IGHG4,IGHV1-69D,IGHV2-26,IGHV3-72,IGHV3-73,IGKV1-8,IGKV1D-16,IGKV3D-15,IGLV1-36,IGLV1-40,IGLV2-23,MAPK11
Coagulation System	2.12	0.114	1	F3,FGA,PLAUR,SERPINE1
IL-6 Signaling	2.08	0.0625	1.134	COL1A1,CXCL8,IL1RN,IL6,IL6R,MAPK11,SOCS3,TNFAIP6
Phagosome Formation	2.05	0.0375	1.8	ACKR1,ACKR3,ADGRF1,ADGRF5,APLNR,FGR,FZD4,GPR160,GPR171,GPR4,HMOX1,IGHG4,ITGA5,ITGA6,ITGA9,ITGAX,ITGB4,LTB4R,MARCO,PIP5KL1,PLA2G1B,PLA2G6,PLA2G7,PTK2,SPHK1
HGF Signaling	2.02	0.0611	0	IL6,ITGA5,ITGA6,ITGA9,ITGAX,ITGB4,MET,PTK2
IL-17A Signaling in Fibroblasts	2	0.105	#NUM!	CXCL5,IL6,MAPK11,MMP1
Glucocorticoid Receptor Signaling	1.97	0.0389	#NUM!	CD163,CXCL3,CXCL8,HLA-DQB2,HSPA6,ICAM1,IL1RN,IL6,IL6R,KRT17,KRT6A,KRT7,MAPK11,MMP1,MMP13,MMP9,NCOA2,NDUFA4L2,PLA2G1B,PLA2G6,SERPINE1
LPS/IL-1 Mediated Inhibition of RXR Function	1.95	0.05	#NUM!	ACSL5,ALDH3A1,APOE,FABP3,FMO5,HS3ST2,HS6ST2,IL1RN,SCARB1,SMOX,SULT2B1
CDK5 Signaling	1.9	0.0631	1	FOSB,ITGA6,LAMA5,LAMB1,LAMC2,MAPK11,PPP2R3A
Ephrin Receptor Signaling	1.83	0.0503	#NUM!	EFNB1,ITGA5,ITGA6,ITGA9,ITGAX,ITGB4,PDGFB,PTK2,PTPN13,VEGFC
Eicosanoid Signaling	1.82	0.0769	1	ALOX15B,LTB4R,PLA2G1B,PLA2G6,PLA2G7
Colorectal Cancer Metastasis Signaling	1.8	0.0458	2.309	FZD4,IL6,IL6R,MMP1,MMP11,MMP12,MMP13,MMP14,MMP19,MMP9,RHOV,VEGFC
Sertoli Cell-Sertoli Cell Junction Signaling	1.79	0.0495	#NUM!	ACTG2,CLDN18,CLDN5,ITGA5,ITGA6,ITGA9,ITGAX,ITGB4,MAPK11,OCLN
Salvage Pathways of Pyrimidine Deoxyribonucleotides	1.79	0.222	#NUM!	CDA,TYMP
PAK Signaling	1.79	0.0598	#NUM!	ITGA5,ITGA6,ITGA9,ITGAX,ITGB4,PDGFB,PTK2
Actin Nucleation by ARP-WASP Complex	1.78	0.0659	#NUM!	ITGA5,ITGA6,ITGA9,ITGAX,ITGB4,RHOV
Chondroitin Sulfate Biosynthesis (Late Stages)	1.78	0.0909	1	CSGALNACT1,HS3ST2,HS6ST2,SULT2B1
Signaling by Rho Family GTPases	1.77	0.0453	0.707	ACTG2,CDC42EP2,CDC42EP3,CDC42EP5,ITGA5,ITGA6,ITGA9,ITGAX,ITGB4,PIP5KL1,PTK2,RHOV
IL-17A Signaling in Airway Cells	1.76	0.0746	#NUM!	CXCL1,CXCL3,CXCL5,IL6,MAPK11
IL-8 Signaling	1.73	0.0483	1.897	CXCL1,CXCL8,HBEGF,HMOX1,ICAM1,ITGAX,MMP9,PTK2,RHOV,VEGFC
IL-17A Signaling in Gastric Cells	1.7	0.115	#NUM!	CXCL1,CXCL8,MAPK11
D-myo-inositol (1,4,5)-Trisphosphate Biosynthesis	1.7	0.115	#NUM!	PIP5KL1,PLCD3,PLCH1
Adenine and Adenosine Salvage VI	1.65	1	#NUM!	ADK
ERK/MAPK Signaling	1.65	0.0469	0	DUSP4,ITGA5,ITGA6,ITGA9,ITGAX,ITGB4,PLA2G1B,PLA2G6,PPP2R3A,PTK2
IL-10 Signaling	1.64	0.0694	#NUM!	HMOX1,IL1RN,IL6,MAPK11,SOCS3
Role of Osteoblasts, Osteoclasts and Chondrocytes in Rheumatoid Arthritis	1.58	0.0457	#NUM!	BMP1,BMP3,COL1A1,FZD4,IL1RN,IL6,ITGA5,MMP1,MMP13,MMP14
HMGB1 Signaling	1.56	0.0503	1.633	CXCL8,ICAM1,IL6,LIF,MAPK11,OSM,RHOV,SERPINE1
Chondroitin Sulfate Biosynthesis	1.54	0.0769	1	CSGALNACT1,HS3ST2,HS6ST2,SULT2B1
Maturity Onset Diabetes of Young (MODY) Signaling	1.53	0.0649	#NUM!	APOD,APOE,APOH,APOL1,KCNJ8
Coronavirus Pathogenesis Pathway	1.5	0.0464	1.134	CCNE1,CTSL,CXCL8,FURIN,IL6,MAPK11,SERPINE1,TFDP1,TMPRSS2
Role of Hypercytokinemia/hyperchemokinemia in the Pathogenesis of Influenza	1.47	0.0625	2.236	CXCL3,CXCL8,IL1RN,IL6,ISG20
Dermatan Sulfate Biosynthesis	1.46	0.0727	1	CSGALNACT1,HS3ST2,HS6ST2,SULT2B1
RAC Signaling	1.46	0.0511	#NUM!	ITGA5,ITGA6,ITGA9,ITGAX,ITGB4,PIP5KL1,PTK2
Glioblastoma Multiforme Signaling	1.44	0.0476	0.816	CCNE1,CDK6,FZD4,IGF2,PDGFB,PLCD3,PLCH1,RHOV
B Cell Receptor Signaling	1.43	0.0384	#NUM!	IGHG4,IGHV1-69D,IGHV2-26,IGHV3-72,IGHV3-73,IGKV1-8,IGKV1D-16,IGKV3D-15,IGLV1-36,IGLV1-40,IGLV2-23,MAPK11,PAG1,PTK2
Airway Inflammation in Asthma	1.43	0.0909	#NUM!	CXCL8,MMP9,OSM
Neuroprotective Role of THOP1 in Alzheimer's Disease	1.41	0.0541	-0.447	CFD,DPP4,HTRA3,MMP9,TMPRSS2,TMPRSS4
Xenobiotic Metabolism Signaling	1.37	0.0406	#NUM!	ALDH3A1,CAMK1D,FMO5,HMOX1,HS3ST2,HS6ST2,IL6,MAPK11,PPP2R3A,SMOX,SULT2B1
Semaphorin Signaling in Neurons	1.36	0.0678	#NUM!	MET,PTK2,RHOV,SEMA7A
Neuroinflammation Signaling Pathway	1.36	0.0393	0.632	BACE2,CX3CL1,CXCL8,HLA-DQB2,HMOX1,ICAM1,IL6,IL6R,MAPK11,MMP9,PLA2G1B,PLA2G6
UDP-D-xylose and UDP-D-glucuronate Biosynthesis	1.35	0.5	#NUM!	UGDH
Glycine Degradation (Creatine Biosynthesis)	1.35	0.5	#NUM!	GATM
Putrescine Biosynthesis III	1.35	0.5	#NUM!	ODC1
Neuregulin Signaling	1.35	0.0522	#NUM!	HBEGF,ITGA5,ITGA6,ITGA9,ITGAX,ITGB4
Sphingosine-1-phosphate Signaling	1.35	0.0522	0.816	PDGFB,PLCD3,PLCH1,PTK2,RHOV,SPHK1
Semaphorin Neuronal Repulsive Signaling Pathway	1.34	0.0483	0	ITGA5,ITGA6,ITGA9,ITGAX,ITGB4,SEMA3F,SEMA6B
Complement System	1.33	0.0833	#NUM!	C4BPA,CFD,ITGAX
Th1 Pathway	1.32	0.0513	0	HLA-DQB2,ICAM1,IL6,IL6R,NOTCH4,SOCS3
Extrinsic Prothrombin Activation Pathway	1.31	0.125	#NUM!	F3,FGA
Adenosine Nucleotides Degradation II	1.31	0.125	#NUM!	ADA,XDH
Sperm Motility	1.31	0.041	0.378	FGR,MET,PLA2G1B,PLA2G6,PLA2G7,PLCD3,PLCH1,PTK2,PTK6,TIE1
