# Supplementary material for: Disparities in Lung Cancer: miRNA Isoform Characterization in Lung Adenocarcinoma
Source: Preprints.org preprint supplement (doi:10.20944/preprints202112.0501.v1), 2021-12-31
Supplement: Supplementary file 1 [file supplementary › Figure S3.pdf]

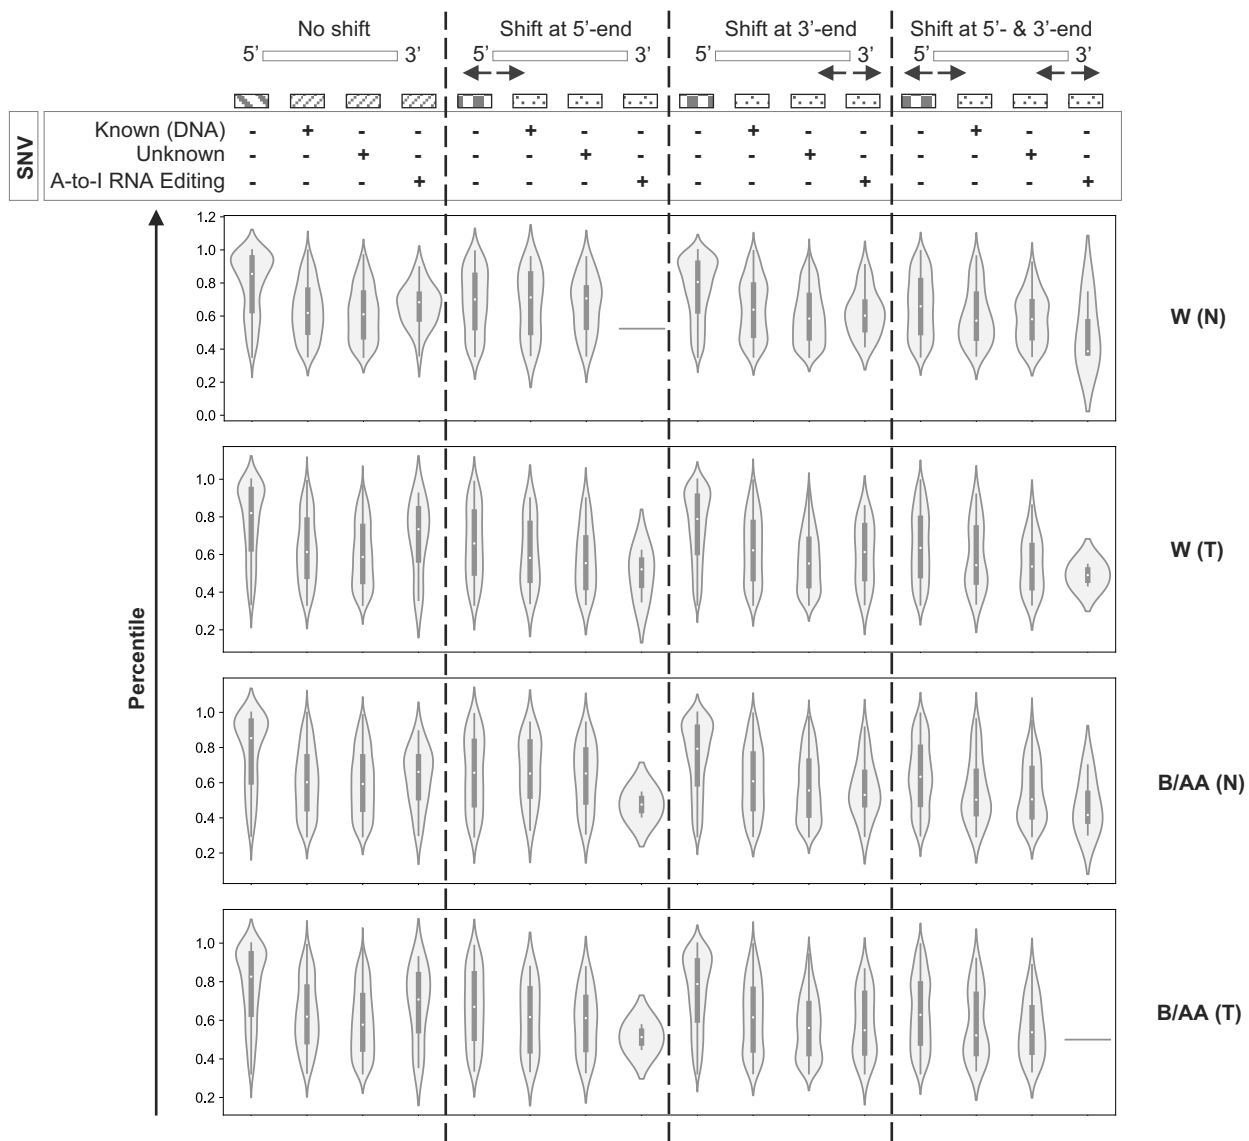

Canonical miRNAs (miRBase)

IsomiRs with SNVs and no shifting (same sequence length as Canonical miRNAs)

IsomiRs with shifting (at 5', 3', or both ends) and no SNVs

IsomiRs with shifting (at 5', 3', or both ends) and SNVs

**W** = White American  
**B/AA** = Black or African American

**N** = Normal tissue  
**T** = Primary tissue

**SNV** = Single Nucleotide Variant (i.e., SNP, somatic mutation, A-to-I RNA Editing)
