# Supplementary material for: Disparities in Lung Cancer: miRNA Isoform Characterization in Lung Adenocarcinoma
Source: Preprints.org preprint supplement (doi:10.20944/preprints202112.0501.v1), 2021-12-31

## Input preprocessing

For each race group/cancer tissue (e.g., Black or African American/Solid Primary Tumor)

- 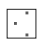 Patients with event (i.e., death or relapse)
- 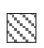 Patients without event (i.e., alive or no relapse)

Calculate the RPM out of the raw read counts and retain miRNA isoforms with *RPM geometric mean expression* > 1

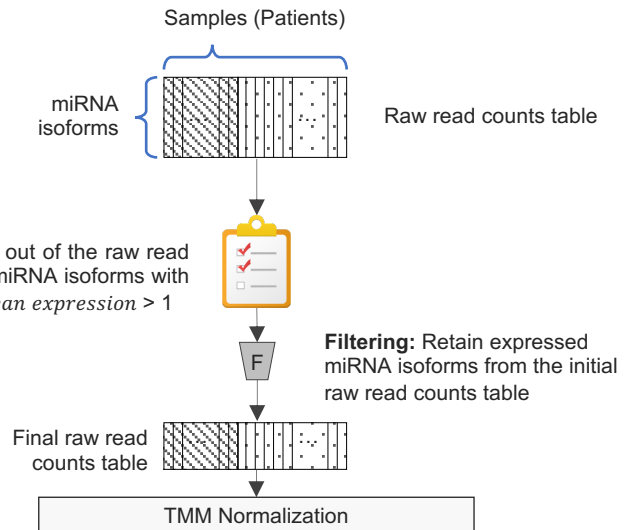

## Risk Score-based Prognostic Signature

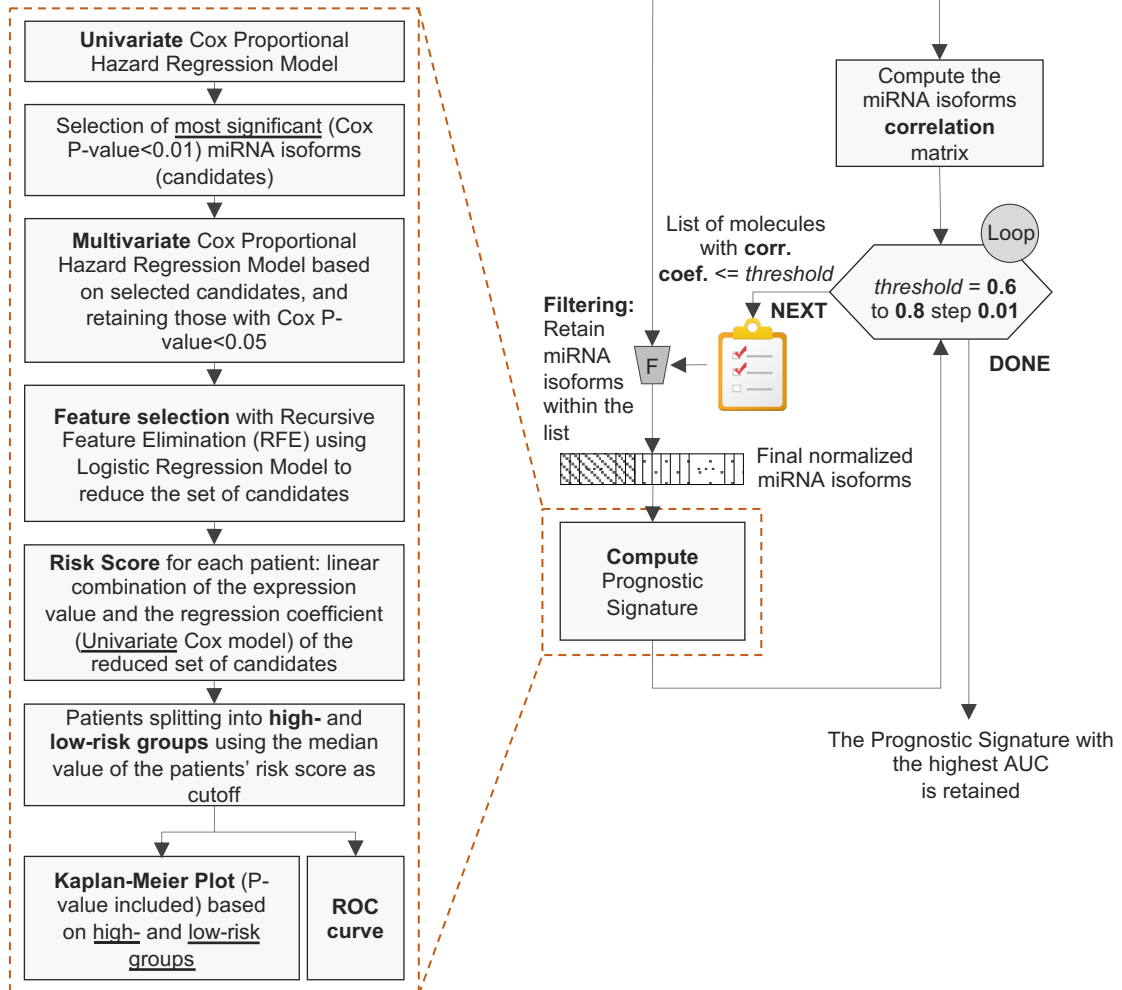

Supplement: Supplementary file 1 [file supplementary › Figure S6.pdf]
