# Supplementary material for: Disparities in Lung Cancer: miRNA Isoform Characterization in Lung Adenocarcinoma
Source: Preprints.org preprint supplement (doi:10.20944/preprints202112.0501.v1), 2021-12-31
Supplement: Supplementary file 1 [file supplementary › Table S1.xlsx]

## Sheet: Sheet2
patient_id	Age at diagnosis	vital_status	pathologic_stage	gender	race	ethnicity	pathologic_M	pathologic_N	pathologic_T	histological_type	kras_mutation_result	kras_mutation_found	egfr_mutation_performed	egfr_mutation_identified	egfr_mutation_result	tobacco_smoking_history	year_of_tobacco_smoking_onset	number_pack_years_smoked	radiation_therapy	history_of_neoadjuvant_treatment	cigarettes_per_day	years_smoked	residual_tumor	grouped_pathologic_stage	grouped_pathologic_stage_early_late
TCGA-64-1678	71.0438	alive	not reported	female	white	not hispanic or latino	m0	n0	t2b	lung adenocarcinoma- not otherwise specified (nos)	not reported	not reported	not reported	not reported	not reported	3	1970	20	not reported	no	1.09589	20	R0	not reported	not reported
TCGA-38-4626	57.2685	alive	not reported	female	white	not hispanic or latino	m0	n0	t2b	lung adenocarcinoma- not otherwise specified (nos)	not reported	not reported	not reported	not reported	not reported	2	1962	40	not reported	no	2.19178	-1	R0	not reported	not reported
TCGA-50-6673	84.0795	dead	stage i	female	white	not reported	m0	n0	t1	lung adenocarcinoma- not otherwise specified (nos)	not reported	not reported	not reported	not reported	not reported	1	-1	-1	not reported	no	-1	-1	R0	i	early
TCGA-97-8552	55.7014	alive	stage i	female	white	not hispanic or latino	mx	n0	t1a	lung bronchioloalveolar carcinoma nonmucinous	not reported	no	yes	not reported	exon 19 deletion	1	-1	-1	no	no	-1	-1	not reported	i	early
TCGA-69-7980	70.0904	alive	stage i	female	white	not hispanic or latino	m0	n0	t1b	lung adenocarcinoma- not otherwise specified (nos)	not reported	not reported	yes	not reported	other	4	-1	80	not reported	no	4.38356	-1	not reported	i	early
TCGA-L4-A4E5	48.4384	alive	stage i	female	white	not hispanic or latino	m0	n0	t1	lung adenocarcinoma- not otherwise specified (nos)	not reported	not reported	no	not reported	not reported	4	1979	33	no	no	1.80822	33	R0	i	early
TCGA-97-A4M3	69.5452	alive	stage ia	female	white	not hispanic or latino	m0	n0	t1b	lung adenocarcinoma mixed subtype	not reported	no	no	not reported	not reported	3	1959	37	no	no	2.05479	25	not reported	i	early
TCGA-NJ-A4YQ	69.663	alive	stage ia	female	white	not hispanic or latino	m0	n0	t1b	lung adenocarcinoma- not otherwise specified (nos)	not reported	not reported	no	not reported	not reported	4	-1	40	no	no	2.19178	-1	RX	i	early
TCGA-93-7348	75.2219	alive	stage ia	female	white	not hispanic or latino	mx	n0	t1a	lung adenocarcinoma- not otherwise specified (nos)	not reported	not reported	no	not reported	not reported	4	1957	42	not reported	no	2.30137	42	R0	i	early
TCGA-55-8621	75.3014	alive	stage ia	female	white	not hispanic or latino	mx	n0	t1a	lung adenocarcinoma- not otherwise specified (nos)	not reported	not reported	not reported	not reported	not reported	4	1980	30	no	no	1.64384	30	R0	i	early
TCGA-L9-A444	60.8274	alive	stage ia	female	white	not hispanic or latino	mx	n0	t1a	lung adenocarcinoma- not otherwise specified (nos)	not reported	not reported	no	not reported	not reported	2	1972	10	no	no	0.547945	-1	R0	i	early
TCGA-95-7043	63.4658	dead	stage ia	female	white	not hispanic or latino	mx	n0	t1a	lung adenocarcinoma mixed subtype	not reported	not reported	not reported	not reported	not reported	4	1964	40	not reported	no	2.19178	39	not reported	i	early
TCGA-55-8203	69.8	alive	stage ia	female	white	not hispanic or latino	m0	n0	t1b	lung adenocarcinoma- not otherwise specified (nos)	not reported	not reported	no	not reported	not reported	2	-1	50	not reported	no	2.73973	-1	R0	i	early
TCGA-91-8497	75.7041	dead	stage ia	female	white	not hispanic or latino	mx	n0	t1a	lung adenocarcinoma- not otherwise specified (nos)	not reported	not reported	not reported	not reported	not reported	1	-1	-1	no	no	-1	-1	not reported	i	early
TCGA-97-7938	76.6575	dead	stage ia	female	white	not hispanic or latino	mx	n0	t1a	lung bronchioloalveolar carcinoma nonmucinous	g12c	yes	yes	not reported	not reported	3	-1	40	not reported	no	2.19178	-1	R0	i	early
TCGA-91-6835	81.8822	alive	stage ia	female	white	not hispanic or latino	m0	n0	t1	lung adenocarcinoma- not otherwise specified (nos)	not reported	not reported	no	not reported	not reported	3	-1	25	not reported	no	1.36986	-1	R0	i	early
TCGA-44-3918	60.9205	alive	stage ia	female	white	not hispanic or latino	m0	n0	t1	lung adenocarcinoma- not otherwise specified (nos)	not reported	not reported	not reported	not reported	not reported	3	1974	20	not reported	no	1.09589	20	R0	i	early
TCGA-49-4514	79.2	alive	stage ia	female	white	not reported	m0	n0	t1	lung papillary adenocarcinoma	not reported	not reported	not reported	not reported	not reported	3	-1	65	not reported	no	3.56164	-1	R0	i	early
TCGA-55-7911	70.537	alive	stage ia	female	white	not hispanic or latino	mx	n0	t1a	lung adenocarcinoma- not otherwise specified (nos)	not reported	not reported	no	not reported	not reported	3	1959	96	not reported	no	5.26027	22	R0	i	early
TCGA-67-3770	70.2959	alive	stage ia	female	white	not hispanic or latino	m0	n0	t1	lung adenocarcinoma- not otherwise specified (nos)	not reported	not reported	no	not reported	not reported	3	-1	-1	not reported	no	-1	-1	R0	i	early
TCGA-97-7553	58.9534	alive	stage ia	female	white	not hispanic or latino	mx	n0	t1	lung bronchioloalveolar carcinoma nonmucinous	not reported	not reported	not reported	not reported	not reported	2	1967	20	not reported	no	1.09589	-1	not reported	i	early
TCGA-91-8499	76.3096	alive	stage ia	female	white	not hispanic or latino	mx	n0	t1b	lung adenocarcinoma- not otherwise specified (nos)	not reported	not reported	yes	not reported	not reported	2	1945	90	no	no	4.93151	-1	not reported	i	early
TCGA-44-A4SU	68	dead	stage ia	female	white	not hispanic or latino	mx	n0	t1a	lung adenocarcinoma- not otherwise specified (nos)	not reported	not reported	not reported	not reported	not reported	4	1961	50	no	no	2.73973	50	R0	i	early
TCGA-93-7347	76.5726	alive	stage ia	female	white	not hispanic or latino	mx	n0	t1a	lung adenocarcinoma mixed subtype	not reported	not reported	no	not reported	not reported	3	1952	11	not reported	no	0.60274	15	R0	i	early
TCGA-55-7573	72.0603	alive	stage ia	female	white	not hispanic or latino	mx	n0	t1b	lung adenocarcinoma- not otherwise specified (nos)	not reported	not reported	no	not reported	not reported	3	-1	-1	not reported	no	-1	-1	not reported	i	early
TCGA-83-5908	59.6164	alive	stage ia	female	white	not hispanic or latino	m0	n0	t1	lung adenocarcinoma- not otherwise specified (nos)	not reported	not reported	no	not reported	not reported	4	1962	69	not reported	no	3.78082	45	R0	i	early
TCGA-MP-A4TA	75.3781	dead	stage ia	female	white	not hispanic or latino	m0	n0	t1	lung adenocarcinoma- not otherwise specified (nos)	not reported	not reported	no	not reported	not reported	4	1951	55	no	no	3.0137	55	R0	i	early
TCGA-55-A492	70.463	alive	stage ia	female	white	not hispanic or latino	mx	n0	t1a	lung adenocarcinoma- not otherwise specified (nos)	not reported	not reported	no	not reported	not reported	3	1962	35	not reported	no	1.91781	33	R0	i	early
TCGA-44-6776	60.6849	alive	stage ia	female	white	not reported	mx	n0	t1	lung adenocarcinoma- not otherwise specified (nos)	not reported	not reported	not reported	not reported	not reported	4	1960	45	not reported	no	2.46575	45	not reported	i	early
TCGA-86-8668	61.3233	alive	stage ia	female	white	not hispanic or latino	m0	n0	t1b	lung bronchioloalveolar carcinoma mucinous	not reported	not reported	not reported	not reported	not reported	1	-1	-1	not reported	no	-1	-1	R0	i	early
TCGA-44-A47G	73.4247	alive	stage ia	female	white	not hispanic or latino	m0	n0	t1	lung adenocarcinoma- not otherwise specified (nos)	not reported	not reported	no	not reported	not reported	4	1956	28	no	no	1.53425	56	R0	i	early
TCGA-J2-A4AD	61.4082	dead	stage ia	female	white	not hispanic or latino	mx	n0	t1a	lung adenocarcinoma- not otherwise specified (nos)	not reported	not reported	no	not reported	not reported	2	1970	120	no	no	6.57534	-1	RX	i	early
TCGA-55-A491	81.0767	alive	stage ia	female	white	not hispanic or latino	mx	n0	t1b	lung adenocarcinoma- not otherwise specified (nos)	not reported	not reported	no	not reported	not reported	3	1952	45	not reported	no	2.46575	30	R0	i	early
TCGA-J2-A4AG	66.3671	alive	stage ia	female	white	not hispanic or latino	mx	n0	t1b	lung adenocarcinoma- not otherwise specified (nos)	not reported	not reported	no	not reported	not reported	3	1956	25	no	no	1.36986	25	R0	i	early
TCGA-44-7672	52.6027	alive	stage ia	female	white	not hispanic or latino	m0	n0	t1b	lung adenocarcinoma- not otherwise specified (nos)	not reported	not reported	not reported	not reported	not reported	2	1980	20	not reported	no	1.09589	-1	not reported	i	early
TCGA-50-5944	69.6986	alive	stage ia	female	white	not reported	m0	n0	t1	lung acinar adenocarcinoma	not reported	not reported	not reported	not reported	not reported	-1	-1	-1	not reported	no	-1	-1	R0	i	early
TCGA-38-7271	72.4384	dead	stage ia	female	white	not hispanic or latino	m0	n0	t1	lung adenocarcinoma- not otherwise specified (nos)	not reported	not reported	no	not reported	not reported	4	1971	25	not reported	no	1.36986	28	R0	i	early
TCGA-55-8208	73.1945	alive	stage ia	female	white	not hispanic or latino	m0	n0	t1b	lung adenocarcinoma- not otherwise specified (nos)	not reported	not reported	not reported	not reported	not reported	2	-1	50	not reported	no	2.73973	-1	R0	i	early
TCGA-44-6145	62.3151	alive	stage ia	female	white	not hispanic or latino	m0	n0	t1	lung adenocarcinoma- not otherwise specified (nos)	not reported	no	not reported	not reported	not reported	4	1963	75	not reported	no	4.10959	36	not reported	i	early
TCGA-55-6543	-0.00273973	alive	stage ia	female	white	not reported	mx	n0	t1b	lung bronchioloalveolar carcinoma mucinous	not reported	not reported	not reported	not reported	not reported	4	-1	60	not reported	no	3.28767	-1	not reported	i	early
TCGA-O1-A52J	74.5836	dead	stage ia	female	white	not hispanic or latino	mx	n0	t1	lung adenocarcinoma- not otherwise specified (nos)	not reported	not reported	no	not reported	not reported	3	1950	45	no	no	2.46575	30	not reported	i	early
TCGA-73-4662	65.1014	alive	stage ia	female	white	not hispanic or latino	m0	n0	t1	lung adenocarcinoma- not otherwise specified (nos)	not reported	not reported	no	not reported	not reported	3	1955	10	not reported	no	0.547945	17	R0	i	early
TCGA-55-7995	73.526	alive	stage ia	female	white	not hispanic or latino	m0	n0	t1b	lung adenocarcinoma- not otherwise specified (nos)	not reported	not reported	no	not reported	not reported	4	-1	60	not reported	no	3.28767	-1	R0	i	early
TCGA-64-1681	61.7123	dead	stage ia	female	white	not hispanic or latino	m0	n0	t1	lung adenocarcinoma- not otherwise specified (nos)	not reported	no	yes	not reported	exon 19 deletion	3	1968	-1	not reported	no	-1	20	R0	i	early
TCGA-L9-A443	63.1836	dead	stage ia	female	white	not hispanic or latino	mx	n0	t1a	lung adenocarcinoma- not otherwise specified (nos)	not reported	not reported	no	not reported	not reported	4	1960	90	no	no	4.93151	45	R0	i	early
TCGA-55-7281	70.8767	alive	stage ia	female	white	not reported	m0	n0	t1b	lung adenocarcinoma- not otherwise specified (nos)	not reported	not reported	not reported	not reported	not reported	4	-1	20	not reported	no	1.09589	-1	R0	i	early
TCGA-86-7953	69.3562	alive	stage ia	female	white	not hispanic or latino	m0	n0	t1b	lung adenocarcinoma- not otherwise specified (nos)	not reported	not reported	no	not reported	not reported	1	-1	-1	not reported	no	-1	-1	RX	i	early
TCGA-49-4488	74.8822	dead	stage ia	female	white	not hispanic or latino	mx	n0	t1	lung adenocarcinoma- not otherwise specified (nos)	not reported	not reported	not reported	not reported	not reported	3	-1	-1	not reported	no	-1	-1	R0	i	early
TCGA-44-2655	65.3534	alive	stage ia	female	white	not hispanic or latino	m0	n0	t1	lung adenocarcinoma- not otherwise specified (nos)	not reported	not reported	not reported	not reported	not reported	3	1958	30	not reported	no	1.64384	30	R0	i	early
TCGA-55-7725	68.0767	alive	stage ia	female	white	not hispanic or latino	mx	n0	t1a	lung adenocarcinoma- not otherwise specified (nos)	not reported	not reported	no	not reported	not reported	3	1963	16	not reported	no	0.876712	31	R0	i	early
TCGA-55-8097	60.9863	alive	stage ia	female	white	not hispanic or latino	mx	n0	t1a	lung adenocarcinoma- not otherwise specified (nos)	not reported	not reported	no	not reported	not reported	4	1973	35	not reported	no	1.91781	35	R0	i	early
TCGA-49-4487	72.8301	dead	stage ia	female	white	not hispanic or latino	m0	n0	t1	lung adenocarcinoma- not otherwise specified (nos)	not reported	not reported	not reported	not reported	not reported	4	-1	40	not reported	no	2.19178	-1	R0	i	early
TCGA-44-3919	71.4548	dead	stage ia	female	white	not hispanic or latino	m0	n0	t1	lung adenocarcinoma- not otherwise specified (nos)	not reported	not reported	not reported	not reported	not reported	1	-1	-1	not reported	no	-1	-1	R0	i	early
TCGA-67-6216	57.4438	alive	stage ia	female	white	not hispanic or latino	m0	n0	t1a	lung adenocarcinoma- not otherwise specified (nos)	not reported	not reported	no	not reported	not reported	1	-1	-1	not reported	no	-1	-1	R0	i	early
TCGA-97-7546	76.474	alive	stage ia	female	white	not hispanic or latino	mx	n0	t1	lung acinar adenocarcinoma	not reported	not reported	not reported	not reported	not reported	3	1963	25	not reported	no	1.36986	20	R0	i	early
TCGA-44-2661	69.3507	alive	stage ia	female	white	not hispanic or latino	m0	n0	t1	lung adenocarcinoma- not otherwise specified (nos)	not reported	not reported	not reported	not reported	not reported	1	-1	-1	not reported	no	-1	-1	R0	i	early
TCGA-97-7941	72.0493	alive	stage ia	female	white	not hispanic or latino	mx	n0	t1b	lung acinar adenocarcinoma	g12a	yes	yes	not reported	not reported	3	1960	22	not reported	no	1.23288	25	R0	i	early
TCGA-55-8299	61.989	dead	stage ia	female	white	not hispanic or latino	mx	n0	t1b	lung adenocarcinoma- not otherwise specified (nos)	not reported	not reported	not reported	not reported	not reported	4	1971	20	no	no	1.09589	41	R0	i	early
TCGA-97-A4M6	45.9288	alive	stage ia	female	white	not hispanic or latino	m0	n0	t1a	lung adenocarcinoma mixed subtype	not reported	no	yes	not reported	exon 19 deletion	1	-1	-1	no	no	-1	-1	not reported	i	early
TCGA-78-7159	60.989	alive	stage ia	female	white	not reported	m0	nx	t1	lung adenocarcinoma mixed subtype	not reported	not reported	no	not reported	not reported	4	1965	21	not reported	no	1.15068	42	R0	i	early
TCGA-50-5935	86.6027	dead	stage ia	female	white	not hispanic or latino	m0	n0	t1	lung adenocarcinoma- not otherwise specified (nos)	not reported	yes	yes	not reported	other	-1	-1	-1	not reported	no	-1	-1	not reported	i	early
TCGA-50-5942	67.8932	alive	stage ia	female	white	not hispanic or latino	m0	n0	t1	lung adenocarcinoma- not otherwise specified (nos)	not reported	not reported	not reported	not reported	not reported	4	-1	30	not reported	no	1.64384	-1	R0	i	early
TCGA-73-7498	58.9781	alive	stage ia	female	white	not hispanic or latino	m0	n0	t1b	lung bronchioloalveolar carcinoma nonmucinous	not reported	not reported	no	not reported	not reported	4	1969	28	no	no	1.53425	28	R0	i	early
TCGA-55-7726	72.4685	alive	stage ia	female	white	not hispanic or latino	mx	n0	t1b	lung adenocarcinoma- not otherwise specified (nos)	not reported	not reported	not reported	not reported	not reported	3	1955	30	not reported	no	1.64384	24	R0	i	early
TCGA-97-A4M1	52.8	alive	stage ia	female	white	not hispanic or latino	m0	n0	t1a	lung adenocarcinoma mixed subtype	not reported	not reported	no	not reported	not reported	3	1972	3	no	no	0.164384	3	not reported	i	early
TCGA-44-6147	67.4822	alive	stage ia	female	white	not hispanic or latino	m0	nx	t1b	lung adenocarcinoma- not otherwise specified (nos)	not reported	not reported	not reported	not reported	not reported	3	1976	-1	not reported	no	-1	4	not reported	i	early
TCGA-J2-A4AE	77.1589	alive	stage ia	female	white	not hispanic or latino	mx	n0	t1a	lung adenocarcinoma- not otherwise specified (nos)	not reported	not reported	no	not reported	not reported	1	-1	-1	no	no	-1	-1	R0	i	early
TCGA-44-3398	77.7863	alive	stage ia	female	white	not hispanic or latino	m0	n0	t1b	lung adenocarcinoma- not otherwise specified (nos)	not reported	not reported	not reported	not reported	not reported	4	1959	60	not reported	no	3.28767	50	R0	i	early
TCGA-MP-A4TH	70.5726	alive	stage ia	female	white	not hispanic or latino	m0	n0	t1a	lung adenocarcinoma- not otherwise specified (nos)	not reported	not reported	no	not reported	not reported	3	1962	20	no	no	1.09589	20	R0	i	early
TCGA-91-6840	59.874	alive	stage ia	female	white	not hispanic or latino	m0	n0	t1b	lung adenocarcinoma- not otherwise specified (nos)	not reported	not reported	not reported	not reported	not reported	3	1971	50	not reported	no	2.73973	25	R0	i	early
TCGA-78-7143	62.1178	dead	stage ib	female	white	not reported	m0	n0	t2	lung bronchioloalveolar carcinoma nonmucinous	not reported	not reported	no	not reported	not reported	1	-1	-1	not reported	no	-1	-1	R0	i	early
TCGA-73-7499	81.3233	dead	stage ib	female	white	not hispanic or latino	m0	n0	t2a	lung adenocarcinoma mixed subtype	not reported	not reported	no	not reported	not reported	1	-1	-1	no	no	-1	-1	R0	i	early
TCGA-67-3773	84.126	alive	stage ib	female	white	not hispanic or latino	m0	n0	t2	lung adenocarcinoma- not otherwise specified (nos)	not reported	not reported	no	not reported	not reported	3	-1	-1	not reported	no	-1	-1	R0	i	early
TCGA-67-6215	52.9041	alive	stage ib	female	white	not hispanic or latino	m0	n0	t2a	lung adenocarcinoma- not otherwise specified (nos)	not reported	not reported	no	not reported	not reported	1	-1	-1	not reported	no	-1	-1	R0	i	early
TCGA-97-7547	67.7726	alive	stage ib	female	white	not hispanic or latino	mx	n0	t2	lung papillary adenocarcinoma	not reported	not reported	not reported	not reported	not reported	3	-1	30	not reported	no	1.64384	-1	not reported	i	early
TCGA-44-6775	72.3699	alive	stage ib	female	white	hispanic or latino	mx	n0	t2a	lung adenocarcinoma- not otherwise specified (nos)	not reported	not reported	not reported	not reported	not reported	4	1955	25	not reported	no	1.36986	50	RX	i	early
TCGA-55-8616	58.1507	alive	stage ib	female	white	not hispanic or latino	m0	n0	t2a	lung adenocarcinoma- not otherwise specified (nos)	not reported	not reported	not reported	not reported	not reported	4	-1	-1	not reported	no	-1	-1	R0	i	early
TCGA-91-6836	52.6466	alive	stage ib	female	white	not hispanic or latino	mx	n0	t2	lung adenocarcinoma- not otherwise specified (nos)	not reported	not reported	no	not reported	not reported	2	1973	50	not reported	no	2.73973	-1	not reported	i	early
TCGA-73-4658	80.8438	dead	stage ib	female	white	not hispanic or latino	m0	n0	t2	lung adenocarcinoma- not otherwise specified (nos)	not reported	not reported	no	not reported	not reported	3	-1	25	not reported	no	1.36986	-1	R0	i	early
TCGA-55-A494	61.7534	alive	stage ib	female	white	not hispanic or latino	mx	n0	t2a	lung adenocarcinoma- not otherwise specified (nos)	g12d	yes	yes	not reported	not reported	3	1967	7	not reported	no	0.383562	13	R0	i	early
TCGA-55-8510	55.9178	alive	stage ib	female	white	not hispanic or latino	mx	n0	t2a	lung adenocarcinoma- not otherwise specified (nos)	not reported	not reported	not reported	not reported	not reported	2	-1	-1	no	no	-1	-1	R0	i	early
TCGA-MP-A5C7	76.7534	alive	stage ib	female	white	not hispanic or latino	m0	n0	t2	lung adenocarcinoma- not otherwise specified (nos)	not reported	not reported	no	not reported	not reported	3	1953	15	no	no	0.821918	15	R0	i	early
TCGA-50-6590	72.4493	dead	stage ib	female	white	not hispanic or latino	m0	n0	t2	lung adenocarcinoma- not otherwise specified (nos)	not reported	not reported	yes	not reported	not reported	4	-1	50	not reported	no	2.73973	-1	not reported	i	early
TCGA-78-7540	66.9589	dead	stage ib	female	white	not reported	m0	n0	t2	lung bronchioloalveolar carcinoma mucinous	not reported	not reported	no	not reported	not reported	1	-1	-1	not reported	no	-1	-1	R0	i	early
TCGA-55-A493	54.8685	alive	stage ib	female	white	not hispanic or latino	m0	n0	t2a	lung adenocarcinoma- not otherwise specified (nos)	not reported	not reported	no	not reported	not reported	2	1977	53	not reported	no	2.90411	-1	R0	i	early
TCGA-55-8204	87.1726	alive	stage ib	female	white	not hispanic or latino	mx	n0	t2a	lung adenocarcinoma- not otherwise specified (nos)	not reported	not reported	not reported	not reported	not reported	3	-1	-1	not reported	no	-1	-1	R0	i	early
TCGA-62-A46V	78.0685	alive	stage ib	female	white	not hispanic or latino	m0	n0	t2	lung adenocarcinoma mixed subtype	not reported	not reported	no	not reported	not reported	3	-1	-1	no	no	-1	-1	R0	i	early
TCGA-44-A47A	78.8548	alive	stage ib	female	white	not hispanic or latino	mx	n0	t2a	lung adenocarcinoma- not otherwise specified (nos)	not reported	not reported	no	not reported	not reported	4	1970	80	no	no	4.38356	40	R0	i	early
TCGA-67-3774	73.1616	alive	stage ib	female	white	not hispanic or latino	m0	n0	t2	lung adenocarcinoma- not otherwise specified (nos)	not reported	not reported	no	not reported	not reported	3	-1	-1	not reported	no	-1	-1	RX	i	early
TCGA-55-8096	67.6274	dead	stage ib	female	white	not hispanic or latino	mx	n0	t2a	lung adenocarcinoma- not otherwise specified (nos)	not reported	not reported	no	not reported	not reported	2	1959	104	not reported	no	5.69863	-1	not reported	i	early
TCGA-95-7948	42.0904	alive	stage ib	female	white	not hispanic or latino	m0	n0	t2a	lung adenocarcinoma mixed subtype	not reported	not reported	not reported	not reported	not reported	3	1993	0	not reported	no	0.00821918	2	R0	i	early
TCGA-86-8075	66.8548	dead	stage ib	female	white	not hispanic or latino	m0	n0	t2	lung adenocarcinoma- not otherwise specified (nos)	not reported	not reported	no	not reported	not reported	1	-1	-1	not reported	no	-1	-1	R0	i	early
TCGA-50-5931	75.9808	dead	stage ib	female	white	not hispanic or latino	m0	n0	t2	lung adenocarcinoma- not otherwise specified (nos)	not reported	not reported	not reported	not reported	not reported	4	-1	40	not reported	no	2.19178	-1	R0	i	early
TCGA-67-3772	82.1616	alive	stage ib	female	white	not hispanic or latino	m0	n0	t2	lung adenocarcinoma- not otherwise specified (nos)	not reported	not reported	no	not reported	not reported	1	-1	-1	not reported	no	-1	-1	not reported	i	early
TCGA-50-6592	71.7562	dead	stage ib	female	white	not hispanic or latino	m0	n0	t2	lung adenocarcinoma- not otherwise specified (nos)	not reported	not reported	not reported	not reported	not reported	4	-1	-1	not reported	no	-1	-1	not reported	i	early
TCGA-97-8177	59.3096	alive	stage ib	female	white	not hispanic or latino	m0	n0	t2a	lung adenocarcinoma mixed subtype	not reported	no	yes	not reported	l858r	1	-1	-1	no	no	-1	-1	not reported	i	early
TCGA-55-6985	58.5781	alive	stage ib	female	white	not reported	mx	n0	t2	lung adenocarcinoma- not otherwise specified (nos)	not reported	not reported	no	not reported	not reported	4	-1	50	not reported	no	2.73973	-1	R0	i	early
TCGA-38-4630	75.8	dead	stage ib	female	white	not hispanic or latino	m0	n0	t2	lung papillary adenocarcinoma	not reported	not reported	no	not reported	not reported	1	-1	-1	not reported	no	-1	-1	R1	i	early
TCGA-55-8511	73.9342	alive	stage ib	female	white	not hispanic or latino	mx	n0	t2a	lung adenocarcinoma- not otherwise specified (nos)	not reported	not reported	not reported	not reported	not reported	2	1953	58	no	no	3.17808	-1	R0	i	early
TCGA-86-7954	68.663	alive	stage ib	female	white	not hispanic or latino	m0	n0	t2	lung bronchioloalveolar carcinoma nonmucinous	not reported	not reported	no	not reported	not reported	3	1963	8	not reported	no	0.438356	8	R0	i	early
TCGA-55-6971	59.5452	alive	stage ib	female	white	not reported	mx	n0	t2	lung adenocarcinoma- not otherwise specified (nos)	not reported	not reported	no	not reported	not reported	4	1970	60	not reported	no	3.28767	40	R0	i	early
TCGA-38-4625	66.4137	alive	stage ib	female	white	not hispanic or latino	m0	n0	t2a	lung adenocarcinoma- not otherwise specified (nos)	not reported	not reported	no	not reported	not reported	2	1952	50	not reported	no	2.73973	-1	R0	i	early
TCGA-44-2657	74.789	alive	stage ib	female	white	not hispanic or latino	m0	nx	t2	lung adenocarcinoma- not otherwise specified (nos)	not reported	not reported	not reported	not reported	not reported	4	1959	25	not reported	no	1.36986	47	R0	i	early
TCGA-49-4501	67.9918	dead	stage ib	female	white	not hispanic or latino	m0	n0	t2	lung adenocarcinoma- not otherwise specified (nos)	not reported	not reported	not reported	not reported	not reported	1	-1	-1	not reported	no	-1	-1	R0	i	early
TCGA-91-6847	62.6356	alive	stage ib	female	white	not hispanic or latino	mx	n0	t2	lung adenocarcinoma- not otherwise specified (nos)	not reported	not reported	not reported	not reported	not reported	3	-1	-1	not reported	no	-1	-1	not reported	i	early
TCGA-64-5781	55.3945	alive	stage ib	female	white	not hispanic or latino	m0	n0	t2	lung adenocarcinoma mixed subtype	not reported	not reported	not reported	not reported	not reported	4	1982	25	not reported	no	1.36986	25	R0	i	early
TCGA-55-6986	-0.00273973	alive	stage ib	female	white	not reported	m0	n0	t2	lung bronchioloalveolar carcinoma nonmucinous	not reported	not reported	no	not reported	not reported	1	-1	-1	not reported	no	-1	-1	not reported	i	early
TCGA-44-7661	69.8164	dead	stage ib	female	white	not hispanic or latino	m0	n0	t2a	lung adenocarcinoma- not otherwise specified (nos)	not reported	not reported	yes	not reported	not reported	3	1961	22	not reported	no	1.20548	15	not reported	i	early
TCGA-44-8117	54.3973	alive	stage ib	female	white	not hispanic or latino	m0	n0	t2a	lung adenocarcinoma- not otherwise specified (nos)	not reported	not reported	not reported	not reported	not reported	4	1975	54	no	no	2.9589	36	not reported	i	early
TCGA-69-7973	42.0685	alive	stage ib	female	white	not hispanic or latino	m0	n0	t2a	lung adenocarcinoma mixed subtype	not reported	not reported	yes	not reported	not reported	4	-1	25	not reported	no	1.36986	-1	not reported	i	early
TCGA-62-A46O	65.8904	dead	stage ib	female	white	not hispanic or latino	m0	n0	t2	lung adenocarcinoma- not otherwise specified (nos)	not reported	not reported	no	not reported	not reported	2	-1	48	no	no	2.63014	-1	R0	i	early
TCGA-55-7728	64.3973	alive	stage ib	female	white	not hispanic or latino	mx	n0	t2a	mucinous (colloid) carcinoma	not reported	not reported	no	not reported	not reported	4	1980	30	not reported	no	1.64384	16	R0	i	early
TCGA-86-A4P7	63.9178	alive	stage ib	female	white	not hispanic or latino	m0	n0	t2a	lung adenocarcinoma- not otherwise specified (nos)	not reported	not reported	no	not reported	not reported	1	-1	-1	not reported	no	-1	-1	R0	i	early
TCGA-50-6597	79.9863	dead	stage ib	female	white	not hispanic or latino	m0	n0	t2	lung adenocarcinoma- not otherwise specified (nos)	not reported	no	yes	not reported	not reported	1	-1	-1	not reported	no	-1	-1	R0	i	early
TCGA-97-A4M0	60.8384	alive	stage ib	female	white	not hispanic or latino	m0	n0	t2a	lung adenocarcinoma mixed subtype	g12c	yes	no	not reported	not reported	4	1970	34	no	no	1.86301	34	not reported	i	early
TCGA-91-8496	63.9945	alive	stage ib	female	white	not hispanic or latino	mx	nx	t2a	lung bronchioloalveolar carcinoma nonmucinous	not reported	not reported	no	not reported	not reported	1	-1	-1	no	no	-1	-1	not reported	i	early
TCGA-55-7574	64.9397	dead	stage ib	female	white	not hispanic or latino	m0	n0	t2a	lung adenocarcinoma- not otherwise specified (nos)	not reported	not reported	not reported	not reported	not reported	4	1971	2	not reported	no	0.109589	40	R1	i	early
TCGA-69-7979	71.726	alive	stage ib	female	white	not hispanic or latino	mx	n0	t2a	lung acinar adenocarcinoma	not reported	not reported	no	not reported	not reported	2	1955	28	not reported	no	1.53425	-1	not reported	i	early
TCGA-NJ-A55A	76.7726	alive	stage ib	female	white	not hispanic or latino	m0	n0	t2	lung adenocarcinoma- not otherwise specified (nos)	not reported	not reported	no	not reported	not reported	3	-1	25	no	no	1.36986	-1	not reported	i	early
TCGA-44-4112	60.5644	dead	stage ib	female	white	not hispanic or latino	m0	n0	t2a	lung adenocarcinoma- not otherwise specified (nos)	not reported	not reported	not reported	not reported	not reported	3	1972	30	not reported	no	1.64384	20	R0	i	early
TCGA-44-6777	85.5726	dead	stage ib	female	white	not reported	mx	nx	t2	lung adenocarcinoma- not otherwise specified (nos)	not reported	not reported	not reported	not reported	not reported	4	1942	64	not reported	no	3.50685	64	not reported	i	early
TCGA-38-4631	72.7068	dead	stage ib	female	white	not hispanic or latino	m0	n0	t2	lung adenocarcinoma- not otherwise specified (nos)	not reported	not reported	no	not reported	not reported	4	-1	40	not reported	no	2.19178	-1	R0	i	early
TCGA-44-5644	51.0795	alive	stage ib	female	white	not hispanic or latino	not reported	n0	t2a	lung adenocarcinoma- not otherwise specified (nos)	not reported	not reported	not reported	not reported	not reported	2	1975	17	not reported	no	0.958904	-1	not reported	i	early
TCGA-55-7724	76.4137	alive	stage ib	female	white	not hispanic or latino	mx	n0	t2a	lung adenocarcinoma- not otherwise specified (nos)	not reported	not reported	not reported	not reported	not reported	4	1958	50	not reported	no	2.73973	50	R0	i	early
TCGA-62-A46R	54.9671	dead	stage ib	female	white	not hispanic or latino	m0	n0	t2	lung adenocarcinoma mixed subtype	not reported	not reported	no	not reported	not reported	4	-1	25	no	no	1.36986	-1	R0	i	early
TCGA-78-7153	65.5397	alive	stage ib	female	white	not reported	m0	n0	t2	lung adenocarcinoma mixed subtype	not reported	not reported	no	not reported	not reported	4	1948	20	not reported	no	1.09589	40	R0	i	early
TCGA-55-8087	59.3288	alive	stage ib	female	white	not hispanic or latino	mx	n0	t2a	lung adenocarcinoma- not otherwise specified (nos)	not reported	not reported	no	not reported	not reported	1	-1	-1	not reported	no	-1	-1	R0	i	early
TCGA-97-8172	75.1123	alive	stage ib	female	white	not hispanic or latino	m0	n0	t2a	lung acinar adenocarcinoma	g12v	yes	yes	not reported	not reported	3	1961	20	no	no	1.09589	20	not reported	i	early
TCGA-97-8175	55.3589	alive	stage ib	female	white	not hispanic or latino	m0	n0	t2a	lung solid pattern predominant adenocarcinoma	not reported	no	yes	not reported	not reported	3	-1	-1	no	no	-1	-1	not reported	i	early
TCGA-86-8280	54.7315	alive	stage iia	female	white	not hispanic or latino	m0	n0	t2b	lung bronchioloalveolar carcinoma nonmucinous	not reported	not reported	not reported	not reported	not reported	1	-1	-1	not reported	no	-1	-1	R0	ii	early
TCGA-49-6744	64.3397	alive	stage iia	female	white	not reported	mx	n1	t2a	lung adenocarcinoma mixed subtype	not reported	yes	not reported	not reported	not reported	4	-1	20	not reported	no	1.09589	-1	R0	ii	early
TCGA-44-7670	47.6493	alive	stage iia	female	white	hispanic or latino	m0	n1	t1b	lung adenocarcinoma- not otherwise specified (nos)	not reported	not reported	not reported	not reported	not reported	2	1980	30	not reported	no	1.64384	-1	not reported	ii	early
TCGA-53-7626	76.7781	dead	stage iia	female	white	not hispanic or latino	m0	n1	t1	lung adenocarcinoma- not otherwise specified (nos)	not reported	not reported	no	not reported	not reported	4	1971	35	not reported	no	1.91781	35	R0	ii	early
TCGA-55-8205	76.8849	alive	stage iia	female	white	not hispanic or latino	m0	n0	t2b	lung adenocarcinoma- not otherwise specified (nos)	not reported	no	yes	not reported	not reported	4	1951	30	not reported	no	1.64384	61	R0	ii	early
TCGA-MP-A4TF	58.5945	dead	stage iia	female	white	not hispanic or latino	m0	n0	t2b	lung adenocarcinoma- not otherwise specified (nos)	not reported	not reported	no	not reported	not reported	4	1970	40	no	no	2.19178	40	R0	ii	early
TCGA-95-A4VN	62.8137	alive	stage iia	female	white	not hispanic or latino	m0	n1	t2a	lung solid pattern predominant adenocarcinoma	not reported	not reported	yes	not reported	not reported	4	1965	42	no	no	2.30137	42	R0	ii	early
TCGA-91-6830	65.5397	alive	stage iia	female	white	not hispanic or latino	mx	n1	t1	lung adenocarcinoma- not otherwise specified (nos)	not reported	not reported	not reported	not reported	not reported	4	1990	12	not reported	no	0.657534	12	not reported	ii	early
TCGA-55-A48X	63.9479	alive	stage iia	female	white	not hispanic or latino	m0	n1	t1b	lung adenocarcinoma- not otherwise specified (nos)	not reported	not reported	not reported	not reported	not reported	4	1963	36	not reported	no	1.9726	36	R0	ii	early
TCGA-78-7539	75.1918	alive	stage iia	female	white	not reported	m0	n0	t2b	lung adenocarcinoma mixed subtype	not reported	not reported	no	not reported	not reported	3	1953	2	not reported	no	0.120548	28	R0	ii	early
TCGA-38-4627	64.411	dead	stage iia	female	white	not hispanic or latino	m0	n1	t1b	lung adenocarcinoma- not otherwise specified (nos)	not reported	not reported	not reported	not reported	not reported	4	-1	-1	not reported	no	-1	-1	R0	ii	early
TCGA-50-5055	79.4192	dead	stage iia	female	white	not hispanic or latino	m0	n1	t1	lung adenocarcinoma mixed subtype	not reported	no	yes	not reported	not reported	-1	-1	-1	not reported	no	-1	-1	R0	ii	early
TCGA-86-8074	62.6356	alive	stage iia	female	white	not hispanic or latino	m0	n1	t1b	lung adenocarcinoma- not otherwise specified (nos)	not reported	not reported	no	not reported	not reported	2	1970	40	not reported	no	2.19178	-1	R0	ii	early
TCGA-55-7914	71.5205	dead	stage iia	female	white	not hispanic or latino	mx	n1	t1b	lung adenocarcinoma- not otherwise specified (nos)	g12c	yes	yes	not reported	not reported	2	1990	5	not reported	no	0.273973	-1	R0	ii	early
TCGA-J2-8192	65.4575	alive	stage iia	female	white	not hispanic or latino	mx	n1	t2a	lung adenocarcinoma- not otherwise specified (nos)	not reported	no	yes	not reported	exon 19 deletion	1	-1	-1	no	no	-1	-1	not reported	ii	early
TCGA-86-6851	73.4466	alive	stage iia	female	white	not hispanic or latino	m0	n1	t1b	lung adenocarcinoma mixed subtype	not reported	not reported	not reported	not reported	not reported	2	1959	52	not reported	no	2.84932	-1	not reported	ii	early
TCGA-NJ-A55O	56.5151	alive	stage iia	female	white	not hispanic or latino	m0	n1	t1b	mucinous (colloid) carcinoma	not reported	not reported	no	not reported	not reported	4	-1	30	no	no	1.64384	-1	not reported	ii	early
TCGA-67-6217	73.7534	alive	stage iia	female	white	not hispanic or latino	m0	n1	t2a	lung adenocarcinoma- not otherwise specified (nos)	not reported	no	yes	not reported	l858r	3	-1	-1	not reported	no	-1	-1	R0	ii	early
TCGA-38-4628	65.9096	dead	stage iib	female	white	not hispanic or latino	m0	n1	t2	lung adenocarcinoma- not otherwise specified (nos)	not reported	not reported	no	not reported	not reported	1	-1	-1	not reported	no	-1	-1	R0	ii	early
TCGA-95-7039	54.7425	alive	stage iib	female	white	not hispanic or latino	mx	n0	t3	lung adenocarcinoma- not otherwise specified (nos)	not reported	not reported	not reported	not reported	not reported	2	-1	34	not reported	no	1.86301	-1	not reported	ii	early
TCGA-55-8619	72.9205	alive	stage iib	female	white	not hispanic or latino	mx	n0	t3	mucinous (colloid) carcinoma	not reported	not reported	not reported	not reported	not reported	1	-1	-1	no	no	-1	-1	R0	ii	early
TCGA-50-5068	59.5288	dead	stage iib	female	white	not hispanic or latino	mx	n1	t2	lung adenocarcinoma- not otherwise specified (nos)	not reported	not reported	not reported	not reported	not reported	-1	-1	-1	not reported	no	-1	-1	not reported	ii	early
TCGA-49-4505	61.9945	dead	stage iib	female	white	not hispanic or latino	m0	n1	t2	lung adenocarcinoma- not otherwise specified (nos)	not reported	not reported	not reported	not reported	not reported	4	1949	74	not reported	no	4.05479	37	R0	ii	early
TCGA-55-6982	-0.00273973	dead	stage iib	female	white	not reported	m0	n1	t2	lung adenocarcinoma- not otherwise specified (nos)	not reported	not reported	no	not reported	not reported	1	-1	-1	not reported	no	-1	-1	not reported	ii	early
TCGA-J2-8194	69.7014	alive	stage iib	female	white	not hispanic or latino	mx	n0	t3	lung adenocarcinoma mixed subtype	not reported	not reported	not reported	not reported	not reported	3	1956	20	no	no	1.09589	26	not reported	ii	early
TCGA-44-7667	49.4849	alive	stage iib	female	white	not hispanic or latino	mx	n0	t3	lung adenocarcinoma- not otherwise specified (nos)	not reported	not reported	not reported	not reported	not reported	2	1974	50	not reported	no	2.73973	-1	not reported	ii	early
TCGA-62-8397	70.4877	alive	stage iib	female	white	not hispanic or latino	m0	n0	t3	lung adenocarcinoma mixed subtype	not reported	not reported	no	not reported	not reported	1	-1	-1	no	no	-1	-1	R0	ii	early
TCGA-49-4506	68.8548	dead	stage iib	female	white	not hispanic or latino	m0	n1	t2	lung adenocarcinoma- not otherwise specified (nos)	not reported	not reported	not reported	not reported	not reported	2	-1	100	not reported	no	5.47945	-1	R1	ii	early
TCGA-55-6979	59.6712	dead	stage iib	female	white	not reported	m0	n1	t2	lung adenocarcinoma- not otherwise specified (nos)	not reported	not reported	no	not reported	not reported	3	-1	-1	not reported	no	-1	-1	not reported	ii	early
TCGA-62-8395	80.3041	alive	stage iib	female	white	not hispanic or latino	m0	n0	t3	lung adenocarcinoma mixed subtype	not reported	not reported	yes	not reported	not reported	1	-1	-1	no	no	-1	-1	R0	ii	early
TCGA-44-2665	55.7507	alive	stage iib	female	white	not hispanic or latino	m0	n1	t2	lung adenocarcinoma- not otherwise specified (nos)	not reported	not reported	not reported	not reported	not reported	1	-1	-1	not reported	no	-1	-1	R0	ii	early
TCGA-44-2659	65.2274	alive	stage iib	female	white	not hispanic or latino	m0	n1	t1	lung adenocarcinoma- not otherwise specified (nos)	not reported	not reported	not reported	not reported	not reported	4	1965	57	not reported	no	3.12329	38	R0	ii	early
TCGA-55-8506	62.6027	alive	stage iib	female	white	not hispanic or latino	mx	n0	t3	lung adenocarcinoma- not otherwise specified (nos)	not reported	not reported	not reported	not reported	not reported	2	1972	-1	not reported	no	-1	-1	R0	ii	early
TCGA-86-8671	72.4603	alive	stage iib	female	white	not hispanic or latino	m0	n1	t2b	lung papillary adenocarcinoma	not reported	not reported	not reported	not reported	not reported	1	-1	-1	not reported	no	-1	-1	R0	ii	early
TCGA-62-A46U	71.2274	alive	stage iib	female	white	not hispanic or latino	m0	n1	t2	lung adenocarcinoma mixed subtype	not reported	not reported	no	not reported	not reported	1	-1	-1	no	no	-1	-1	R0	ii	early
TCGA-78-7161	69.2986	dead	stage iib	female	white	not reported	m0	n0	t3	lung adenocarcinoma mixed subtype	not reported	not reported	yes	not reported	not reported	4	1961	27	not reported	no	1.52329	37	R1	ii	early
TCGA-MP-A4T4	68.6356	dead	stage iib	female	white	not reported	m0	n1	t2	lung adenocarcinoma- not otherwise specified (nos)	not reported	not reported	no	not reported	not reported	2	1954	50	no	no	2.73973	-1	R0	ii	early
TCGA-55-8513	77.4904	alive	stage iib	female	white	not hispanic or latino	mx	n0	t3	mucinous (colloid) carcinoma	not reported	not reported	yes	not reported	not reported	1	-1	-1	no	no	-1	-1	R0	ii	early
TCGA-55-6984	-0.00273973	dead	stage iib	female	white	not hispanic or latino	m0	n1	t2	lung adenocarcinoma- not otherwise specified (nos)	not reported	not reported	no	not reported	not reported	-1	-1	-1	not reported	no	-1	-1	not reported	ii	early
TCGA-44-6779	50.6	dead	stage iib	female	white	not reported	mx	n1	t2	lung adenocarcinoma- not otherwise specified (nos)	not reported	not reported	not reported	not reported	not reported	4	1978	15	not reported	no	0.821918	30	not reported	ii	early
TCGA-78-7147	67.9699	dead	stage iib	female	white	not reported	m0	n1	t2	lung adenocarcinoma- not otherwise specified (nos)	not reported	not reported	no	not reported	not reported	2	1950	50	not reported	no	2.73973	-1	R0	ii	early
TCGA-86-8278	63.3342	alive	stage iib	female	white	not hispanic or latino	m0	n1	t2	lung adenocarcinoma- not otherwise specified (nos)	not reported	not reported	not reported	not reported	not reported	1	-1	-1	not reported	no	-1	-1	R0	ii	early
TCGA-49-6767	46.8712	alive	stage iib	female	white	not reported	mx	n0	t3	lung adenocarcinoma- not otherwise specified (nos)	not reported	not reported	not reported	not reported	not reported	2	-1	30	not reported	no	1.64384	-1	R0	ii	early
TCGA-78-7220	53.3699	dead	stage iiia	female	white	not reported	m0	n2	t2	lung adenocarcinoma mixed subtype	not reported	not reported	no	not reported	not reported	2	1965	35	not reported	no	1.91781	-1	R0	iii	late
TCGA-50-5941	55.7534	alive	stage iiia	female	white	not reported	m0	n2	t2a	lung adenocarcinoma- not otherwise specified (nos)	not reported	not reported	not reported	not reported	not reported	2	-1	25	not reported	no	1.36986	-1	not reported	iii	late
TCGA-49-4507	73.5644	dead	stage iiia	female	white	not hispanic or latino	m0	n1	t3	lung adenocarcinoma- not otherwise specified (nos)	not reported	not reported	not reported	not reported	not reported	4	-1	78	not reported	no	4.27397	-1	R0	iii	late
TCGA-55-6981	53.4164	dead	stage iiia	female	white	not hispanic or latino	m0	n2	t1	lung adenocarcinoma- not otherwise specified (nos)	not reported	not reported	no	not reported	not reported	3	-1	-1	not reported	no	-1	-1	R0	iii	late
TCGA-49-4512	69.8685	dead	stage iiia	female	white	not hispanic or latino	mx	n2	t2	lung adenocarcinoma- not otherwise specified (nos)	not reported	not reported	not reported	not reported	not reported	1	-1	-1	not reported	no	-1	-1	R1	iii	late
TCGA-44-6774	56.0603	alive	stage iiia	female	white	not hispanic or latino	m0	n2	t1	lung adenocarcinoma- not otherwise specified (nos)	not reported	not reported	not reported	not reported	not reported	2	1971	20	not reported	no	1.09589	-1	not reported	iii	late
TCGA-49-6761	68.0795	alive	stage iiia	female	white	not hispanic or latino	mx	n2	t1	lung adenocarcinoma- not otherwise specified (nos)	not reported	not reported	not reported	not reported	not reported	4	-1	50	not reported	no	2.73973	-1	R0	iii	late
TCGA-50-6595	74.5123	dead	stage iiia	female	white	not hispanic or latino	m0	n2	t2	lung adenocarcinoma- not otherwise specified (nos)	not reported	not reported	yes	not reported	not reported	3	-1	-1	not reported	no	-1	-1	not reported	iii	late
TCGA-55-6970	67.8712	dead	stage iiia	female	white	not reported	mx	n2	t2	lung papillary adenocarcinoma	not reported	not reported	no	not reported	not reported	4	-1	-1	not reported	no	-1	-1	R1	iii	late
TCGA-86-A4P8	59.5562	alive	stage iiia	female	white	not hispanic or latino	mx	n2	t1b	lung adenocarcinoma- not otherwise specified (nos)	not reported	not reported	yes	not reported	not reported	1	-1	-1	not reported	no	-1	-1	not reported	iii	late
TCGA-44-3396	74.1726	alive	stage iiia	female	white	not hispanic or latino	m0	n2	t2	lung adenocarcinoma- not otherwise specified (nos)	not reported	not reported	not reported	not reported	not reported	2	1959	50	not reported	no	2.73973	-1	R0	iii	late
TCGA-64-1677	78.0329	dead	stage iiia	female	white	not hispanic or latino	m0	n2	t2	lung adenocarcinoma- not otherwise specified (nos)	not reported	not reported	not reported	not reported	not reported	2	1955	50	not reported	no	2.73973	-1	R0	iii	late
TCGA-38-6178	70.1178	alive	stage iiia	female	white	not hispanic or latino	not reported	n2	t2b	lung adenocarcinoma- not otherwise specified (nos)	not reported	no	yes	not reported	exon 19 deletion	1	-1	-1	not reported	no	-1	-1	R1	iii	late
TCGA-95-A4VK	74.0822	alive	stage iiia	female	white	not hispanic or latino	m0	n2	t2b	lung adenocarcinoma mixed subtype	not reported	not reported	yes	not reported	not reported	3	1956	45	yes	no	2.46575	30	RX	iii	late
TCGA-95-A4VP	66.1096	alive	stage iiia	female	white	not reported	m0	n2	t2b	lung acinar adenocarcinoma	not reported	not reported	no	not reported	not reported	4	1972	20	no	no	1.09589	40	not reported	iii	late
TCGA-50-6593	49.7315	dead	stage iiia	female	white	not hispanic or latino	m0	n2	t1	lung adenocarcinoma mixed subtype	not reported	no	yes	not reported	not reported	4	-1	-1	not reported	no	-1	-1	R0	iii	late
TCGA-50-5051	42.6986	dead	stage iiia	female	white	not hispanic or latino	m0	n2	t2	lung adenocarcinoma- not otherwise specified (nos)	other	yes	yes	not reported	not reported	4	-1	30	not reported	no	1.64384	-1	R0	iii	late
TCGA-62-A46Y	70.9726	dead	stage iiia	female	white	not hispanic or latino	m0	n2	t2	lung adenocarcinoma mixed subtype	not reported	not reported	no	not reported	not reported	1	-1	-1	yes	no	-1	-1	R0	iii	late
TCGA-49-6743	81.663	alive	stage iiia	female	white	not reported	mx	n2	t1	lung clear cell adenocarcinoma	not reported	not reported	not reported	not reported	not reported	4	-1	50	not reported	no	2.73973	-1	not reported	iii	late
TCGA-69-7974	54.8521	alive	stage iiia	female	white	not hispanic or latino	mx	n2	t2a	lung adenocarcinoma mixed subtype	not reported	not reported	yes	not reported	other	4	1981	30	not reported	no	1.64384	30	not reported	iii	late
TCGA-97-7554	83.0877	alive	stage iiia	female	white	not hispanic or latino	m0	n2	t2a	lung papillary adenocarcinoma	g12v	yes	not reported	not reported	not reported	3	1945	30	not reported	no	1.64384	38	R0	iii	late
TCGA-99-7458	74.9562	alive	stage iiia	female	white	not hispanic or latino	m0	n0	t4	lung bronchioloalveolar carcinoma nonmucinous	g12a	yes	yes	not reported	not reported	4	1958	52	not reported	no	2.84932	52	R0	iii	late
TCGA-MP-A4T9	54.1562	dead	stage iiia	female	white	not hispanic or latino	mx	n2	t2	lung adenocarcinoma- not otherwise specified (nos)	not reported	not reported	no	not reported	not reported	4	1980	24	yes	no	1.31507	24	RX	iii	late
TCGA-55-7283	76.5644	alive	stage iiia	female	white	not hispanic or latino	mx	n2	t3	lung bronchioloalveolar carcinoma nonmucinous	not reported	not reported	no	not reported	not reported	3	1950	5	not reported	no	0.273973	11	not reported	iii	late
TCGA-62-8402	73.7918	dead	stage iiia	female	white	not hispanic or latino	m0	n2	t2	lung adenocarcinoma mixed subtype	not reported	not reported	yes	not reported	exon 19 deletion	1	-1	-1	yes	no	-1	-1	R0	iii	late
TCGA-MP-A4T6	76.6932	dead	stage iiia	female	white	not hispanic or latino	mx	n2	t1	lung adenocarcinoma- not otherwise specified (nos)	not reported	not reported	no	not reported	not reported	3	-1	50	no	no	2.73973	-1	R0	iii	late
TCGA-49-4490	45.5726	dead	stage iiia	female	white	not hispanic or latino	m0	n2	t3	lung adenocarcinoma- not otherwise specified (nos)	not reported	not reported	not reported	not reported	not reported	3	-1	5	not reported	no	0.273973	-1	not reported	iii	late
TCGA-NJ-A4YI	87.3068	dead	stage iiia	female	white	not reported	m0	n2	t2	lung papillary adenocarcinoma	not reported	not reported	not reported	not reported	not reported	3	1936	3	no	no	0.164384	40	not reported	iii	late
TCGA-64-1679	58.3836	alive	stage iiia	female	white	not hispanic or latino	m0	n2	t1	lung adenocarcinoma- not otherwise specified (nos)	not reported	not reported	not reported	not reported	not reported	2	-1	40	not reported	no	2.19178	-1	R0	iii	late
TCGA-78-7146	71.9781	dead	stage iiia	female	white	not reported	m0	n2	t2	lung adenocarcinoma mixed subtype	not reported	not reported	no	not reported	not reported	4	1988	6	not reported	no	0.328767	10	R0	iii	late
TCGA-86-8056	64.0247	alive	stage iiia	female	white	not hispanic or latino	m0	n0	t4	lung adenocarcinoma mixed subtype	not reported	not reported	no	not reported	not reported	3	1963	36	not reported	no	1.9726	12	R0	iii	late
TCGA-50-5044	72.7863	dead	stage iiib	female	white	not hispanic or latino	m0	n1	t4	lung adenocarcinoma- not otherwise specified (nos)	not reported	not reported	not reported	not reported	not reported	-1	-1	-1	not reported	no	-1	-1	not reported	iii	late
TCGA-53-7813	51.7123	alive	stage iiib	female	white	not hispanic or latino	m0	n0	t4	lung bronchioloalveolar carcinoma nonmucinous	not reported	not reported	no	not reported	not reported	4	1973	35	not reported	no	1.91781	35	not reported	iii	late
TCGA-62-8394	65.0904	dead	stage iiib	female	white	not hispanic or latino	m0	n2	t4	lung adenocarcinoma mixed subtype	not reported	not reported	no	not reported	not reported	1	-1	-1	no	no	-1	-1	R0	iii	late
TCGA-55-A48Z	60.4274	alive	stage iiib	female	white	not hispanic or latino	mx	n3	t1a	lung adenocarcinoma mixed subtype	not reported	no	yes	not reported	other	4	1972	40	not reported	no	2.19178	40	R0	iii	late
TCGA-78-7158	59.5671	dead	stage iiib	female	white	not reported	m0	n2	t4	lung adenocarcinoma mixed subtype	not reported	not reported	no	not reported	not reported	4	1963	14	not reported	no	0.767123	42	R1	iii	late
TCGA-78-7145	52.274	dead	stage iv	female	white	not reported	m1	n1	t4	lung adenocarcinoma- not otherwise specified (nos)	not reported	not reported	no	not reported	not reported	4	1973	25	not reported	no	1.36986	25	R1	iv	late
TCGA-55-7816	49.7808	dead	stage iv	female	white	not hispanic or latino	mx	nx	tx	lung adenocarcinoma- not otherwise specified (nos)	not reported	not reported	not reported	not reported	not reported	1	-1	-1	not reported	no	-1	-1	not reported	iv	late
TCGA-99-8033	74.9096	dead	stage iv	female	white	not hispanic or latino	m1	nx	tx	lung adenocarcinoma- not otherwise specified (nos)	not reported	no	yes	not reported	not reported	1	-1	-1	no	no	-1	-1	R0	iv	late
TCGA-50-6591	63.1973	dead	stage iv	female	white	not hispanic or latino	m1	n0	t2	lung adenocarcinoma- not otherwise specified (nos)	not reported	not reported	not reported	not reported	not reported	1	-1	-1	not reported	no	-1	-1	not reported	iv	late
TCGA-53-7624	40.5315	dead	stage iv	female	white	hispanic or latino	m1	n0	t2	lung adenocarcinoma- not otherwise specified (nos)	not reported	not reported	no	not reported	not reported	2	1986	50	not reported	no	2.73973	-1	R0	iv	late
TCGA-67-4679	69.0466	alive	not reported	male	white	not hispanic or latino	m0	n0	t3	lung adenocarcinoma- not otherwise specified (nos)	not reported	not reported	no	not reported	not reported	4	-1	-1	not reported	no	-1	-1	R0	not reported	not reported
TCGA-55-5899	-0.00273973	alive	not reported	male	white	not hispanic or latino	m0	n1	t1a	lung adenocarcinoma- not otherwise specified (nos)	not reported	not reported	not reported	not reported	not reported	2	1985	-1	not reported	no	-1	-1	R0	not reported	not reported
TCGA-69-8254	85.2986	alive	not reported	male	white	not hispanic or latino	not reported	not reported	t2b	lung adenocarcinoma mixed subtype	not reported	not reported	yes	not reported	other	3	-1	40	no	no	2.19178	-1	not reported	not reported	not reported
TCGA-69-7763	69.3589	alive	stage ia	male	white	not hispanic or latino	m0	n0	t1b	lung adenocarcinoma mixed subtype	not reported	not reported	no	not reported	not reported	4	1959	7	not reported	no	0.410959	45	not reported	i	early
TCGA-44-6148	60.6521	alive	stage ia	male	white	not hispanic or latino	m0	n0	t1b	lung mucinous adenocarcinoma	not reported	no	not reported	not reported	not reported	3	1963	60	not reported	no	3.28767	31	RX	i	early
TCGA-97-A4M7	74.1425	alive	stage ia	male	white	not hispanic or latino	m0	n0	t1b	lung adenocarcinoma mixed subtype	not reported	no	yes	not reported	l858r	3	1958	40	no	no	2.19178	20	R0	i	early
TCGA-86-8669	64.2274	alive	stage ia	male	white	not hispanic or latino	m0	n0	t1b	lung adenocarcinoma- not otherwise specified (nos)	not reported	not reported	not reported	not reported	not reported	2	1965	47	not reported	no	2.57534	-1	R0	i	early
TCGA-55-8089	56.3726	dead	stage ia	male	white	not hispanic or latino	m0	n0	t1a	lung adenocarcinoma- not otherwise specified (nos)	not reported	no	yes	not reported	not reported	2	1973	97	not reported	no	5.31507	-1	R0	i	early
TCGA-55-1592	-0.00273973	dead	stage ia	male	white	not hispanic or latino	m0	n0	t2	lung adenocarcinoma- not otherwise specified (nos)	not reported	not reported	not reported	not reported	not reported	4	1957	-1	not reported	no	-1	40	R0	i	early
TCGA-97-A4M2	66.611	alive	stage ia	male	white	not hispanic or latino	m0	n0	t1a	lung adenocarcinoma mixed subtype	not reported	no	no	not reported	not reported	2	1972	100	no	no	5.47945	-1	R0	i	early
TCGA-97-A4M5	84.0137	alive	stage ia	male	white	not hispanic or latino	m0	n0	t1b	lung adenocarcinoma mixed subtype	g12c	yes	no	not reported	not reported	3	1952	6	no	no	0.328767	30	not reported	i	early
TCGA-55-6987	77.7589	alive	stage ia	male	white	not hispanic or latino	m0	n0	t1	lung adenocarcinoma- not otherwise specified (nos)	not reported	not reported	no	not reported	not reported	4	-1	-1	not reported	no	-1	-1	not reported	i	early
TCGA-78-7162	75.5973	dead	stage ia	male	white	not reported	m0	n0	t1	lung adenocarcinoma mixed subtype	not reported	not reported	no	not reported	not reported	2	1940	12	not reported	no	0.657534	-1	R0	i	early
TCGA-MP-A4T2	71.2603	dead	stage ia	male	white	not hispanic or latino	m0	n0	t1	lung adenocarcinoma- not otherwise specified (nos)	not reported	not reported	no	not reported	not reported	4	1951	75	no	no	4.10959	50	R0	i	early
TCGA-55-8507	53.1233	alive	stage ia	male	white	not hispanic or latino	mx	n0	t1a	lung adenocarcinoma- not otherwise specified (nos)	not reported	not reported	not reported	not reported	not reported	2	1972	120	no	no	6.57534	-1	R0	i	early
TCGA-95-7944	71.2411	alive	stage ia	male	white	not hispanic or latino	m0	n0	t1a	lung adenocarcinoma- not otherwise specified (nos)	not reported	not reported	not reported	not reported	not reported	2	1961	50	not reported	no	2.73973	-1	R0	i	early
TCGA-35-4123	38.5315	alive	stage ia	male	white	not hispanic or latino	m0	n0	t1	lung adenocarcinoma- not otherwise specified (nos)	not reported	not reported	no	not reported	not reported	4	1990	20	not reported	no	1.09589	20	R0	i	early
TCGA-69-8255	72.0247	alive	stage ia	male	white	hispanic or latino	m0	n0	t1a	lung solid pattern predominant adenocarcinoma	not reported	not reported	yes	not reported	other	2	1971	40	no	no	2.19178	-1	not reported	i	early
TCGA-50-5049	70.074	alive	stage ia	male	white	not hispanic or latino	m0	n0	t2	lung adenocarcinoma- not otherwise specified (nos)	not reported	no	yes	not reported	not reported	-1	-1	-1	not reported	no	-1	-1	not reported	i	early
TCGA-49-4486	72.3699	dead	stage ia	male	white	not hispanic or latino	m0	n0	t1	lung adenocarcinoma- not otherwise specified (nos)	not reported	not reported	not reported	not reported	not reported	3	1932	17	not reported	no	0.958904	35	R0	i	early
TCGA-55-7903	64.4082	alive	stage ia	male	white	not hispanic or latino	mx	n0	t1b	lung adenocarcinoma- not otherwise specified (nos)	not reported	not reported	no	not reported	not reported	2	-1	40	not reported	no	2.19178	-1	R0	i	early
TCGA-93-A4JO	70.9534	dead	stage ia	male	white	not hispanic or latino	mx	n0	t1a	lung adenocarcinoma mixed subtype	not reported	not reported	no	not reported	not reported	4	1956	50	no	no	2.73973	50	RX	i	early
TCGA-50-8460	74.7123	alive	stage ia	male	white	not hispanic or latino	m0	n0	t1a	lung papillary adenocarcinoma	not reported	no	yes	not reported	not reported	-1	-1	-1	yes	no	-1	-1	R0	i	early
TCGA-44-7659	70.4932	alive	stage ia	male	white	not hispanic or latino	mx	n0	t1b	lung adenocarcinoma- not otherwise specified (nos)	not reported	not reported	not reported	not reported	not reported	2	1989	40	not reported	no	2.19178	-1	not reported	i	early
TCGA-50-7109	60.2164	dead	stage ia	male	white	not hispanic or latino	m0	n0	t1	lung adenocarcinoma- not otherwise specified (nos)	not reported	not reported	not reported	not reported	not reported	2	-1	120	not reported	no	6.57534	-1	not reported	i	early
TCGA-55-8085	64.6466	alive	stage ia	male	white	not hispanic or latino	m0	n0	t1b	lung papillary adenocarcinoma	not reported	not reported	not reported	not reported	not reported	2	-1	-1	not reported	no	-1	-1	R0	i	early
TCGA-MN-A4N4	57.2274	alive	stage ia	male	white	not hispanic or latino	m0	n0	t1b	lung adenocarcinoma- not otherwise specified (nos)	not reported	not reported	no	not reported	not reported	2	1980	-1	no	no	-1	-1	R0	i	early
TCGA-55-A4DF	88.8548	dead	stage ia	male	white	not hispanic or latino	mx	n0	t1b	lung adenocarcinoma- not otherwise specified (nos)	not reported	not reported	not reported	not reported	not reported	3	-1	60	no	no	3.28767	-1	R0	i	early
TCGA-97-8179	72.0685	alive	stage ia	male	white	not hispanic or latino	m0	n0	t1a	lung acinar adenocarcinoma	not reported	no	yes	not reported	not reported	3	1958	60	no	no	3.28767	30	not reported	i	early
TCGA-99-8032	62.0137	alive	stage ia	male	white	not hispanic or latino	m0	n0	t1a	lung adenocarcinoma- not otherwise specified (nos)	g12c	yes	yes	not reported	not reported	2	1966	90	no	no	4.93151	-1	R0	i	early
TCGA-50-5946	62.6082	alive	stage ia	male	white	not reported	mx	n0	t1	lung adenocarcinoma mixed subtype	not reported	not reported	not reported	not reported	not reported	4	-1	-1	not reported	no	-1	-1	not reported	i	early
TCGA-64-1676	58.7068	alive	stage ia	male	white	not hispanic or latino	m0	n0	t1a	lung adenocarcinoma- not otherwise specified (nos)	not reported	not reported	not reported	not reported	not reported	2	-1	60	not reported	no	3.28767	-1	R0	i	early
TCGA-86-8076	42.7534	alive	stage ia	male	white	not hispanic or latino	m0	n0	t1	lung papillary adenocarcinoma	not reported	not reported	no	not reported	not reported	1	-1	-1	not reported	no	-1	-1	R0	i	early
TCGA-93-A4JQ	49.1808	alive	stage ia	male	white	not hispanic or latino	mx	n0	t1b	lung acinar adenocarcinoma	not reported	not reported	no	not reported	not reported	3	1973	-1	no	no	-1	20	RX	i	early
TCGA-55-8090	80.0959	dead	stage ia	male	white	not hispanic or latino	m0	n0	t1a	lung adenocarcinoma- not otherwise specified (nos)	not reported	not reported	not reported	not reported	not reported	2	-1	-1	not reported	no	-1	-1	R0	i	early
TCGA-55-6980	-0.00273973	alive	stage ia	male	white	not reported	m0	n0	t1	lung bronchioloalveolar carcinoma nonmucinous	not reported	not reported	no	not reported	not reported	1	-1	-1	not reported	no	-1	-1	R0	i	early
TCGA-MN-A4N5	63.7178	alive	stage ia	male	white	not hispanic or latino	m0	n0	t1a	lung adenocarcinoma- not otherwise specified (nos)	not reported	not reported	yes	not reported	not reported	4	1971	-1	no	no	-1	40	R0	i	early
TCGA-69-7764	75.8712	alive	stage ia	male	white	not hispanic or latino	m0	n0	t1b	lung adenocarcinoma mixed subtype	not reported	not reported	yes	not reported	not reported	3	1977	30	not reported	no	1.64384	14	not reported	i	early
TCGA-55-8206	56.6849	alive	stage ia	male	white	not hispanic or latino	m0	n0	t1b	lung adenocarcinoma- not otherwise specified (nos)	not reported	not reported	not reported	not reported	not reported	1	-1	-1	no	no	-1	-1	R0	i	early
TCGA-91-6828	70.8767	alive	stage ia	male	white	not hispanic or latino	m0	n0	t1a	lung adenocarcinoma- not otherwise specified (nos)	not reported	not reported	not reported	not reported	not reported	3	-1	-1	not reported	no	-1	-1	R0	i	early
TCGA-95-8039	72.1014	alive	stage ia	male	white	not hispanic or latino	mx	n0	t1	lung acinar adenocarcinoma	not reported	not reported	not reported	not reported	not reported	1	-1	-1	no	no	-1	-1	RX	i	early
TCGA-55-A4DG	71.3534	alive	stage ia	male	white	not hispanic or latino	mx	n0	t1b	lung adenocarcinoma- not otherwise specified (nos)	not reported	not reported	not reported	not reported	not reported	4	-1	100	no	no	5.47945	-1	R0	i	early
TCGA-44-A4SS	73.9479	alive	stage ia	male	white	not hispanic or latino	m0	n0	t1b	lung adenocarcinoma- not otherwise specified (nos)	not reported	not reported	not reported	not reported	not reported	4	1952	90	no	no	4.93151	60	not reported	i	early
TCGA-95-7947	67.8137	alive	stage ia	male	white	not hispanic or latino	m0	n0	t1a	lung adenocarcinoma mixed subtype	not reported	not reported	not reported	not reported	not reported	4	1956	100	not reported	no	5.47945	50	R0	i	early
TCGA-86-8281	75.0932	alive	stage ia	male	white	not hispanic or latino	m0	nx	t1	lung adenocarcinoma- not otherwise specified (nos)	not reported	not reported	not reported	not reported	not reported	3	1955	30	not reported	no	1.64384	30	not reported	i	early
TCGA-44-6144	58.3096	alive	stage ia	male	white	not hispanic or latino	m0	n0	t1a	lung adenocarcinoma- not otherwise specified (nos)	not reported	not reported	not reported	not reported	not reported	2	1968	67	not reported	no	3.69863	-1	RX	i	early
TCGA-L4-A4E6	67.4822	alive	stage ia	male	white	not hispanic or latino	m0	n0	t1	lung adenocarcinoma- not otherwise specified (nos)	not reported	not reported	no	not reported	not reported	3	1954	30	no	no	1.64384	30	R0	i	early
TCGA-35-4122	69.8384	alive	stage ia	male	white	not hispanic or latino	m0	n0	t1	lung adenocarcinoma- not otherwise specified (nos)	not reported	not reported	no	not reported	not reported	4	1965	45	not reported	no	2.46575	45	R0	i	early
TCGA-NJ-A55R	67.7753	alive	stage ia	male	white	not hispanic or latino	mx	n0	t1b	lung adenocarcinoma- not otherwise specified (nos)	not reported	not reported	no	not reported	not reported	3	-1	5	no	no	0.273973	-1	not reported	i	early
TCGA-86-8073	58.1205	alive	stage ib	male	white	not hispanic or latino	m0	n0	t2a	lung bronchioloalveolar carcinoma nonmucinous	not reported	not reported	no	not reported	not reported	2	1970	40	not reported	no	2.19178	-1	R0	i	early
TCGA-44-7662	61.7616	alive	stage ib	male	white	not hispanic or latino	mx	n0	t2a	lung adenocarcinoma- not otherwise specified (nos)	not reported	not reported	not reported	not reported	not reported	2	1961	50	not reported	no	2.73973	-1	not reported	i	early
TCGA-97-7552	70.0767	alive	stage ib	male	white	not hispanic or latino	mx	n0	t2	lung bronchioloalveolar carcinoma mucinous	not reported	not reported	not reported	not reported	not reported	3	-1	40	not reported	no	2.19178	-1	not reported	i	early
TCGA-64-5778	60.074	alive	stage ib	male	white	not hispanic or latino	m0	n0	t2	lung bronchioloalveolar carcinoma nonmucinous	not reported	not reported	not reported	not reported	not reported	4	1966	68	not reported	no	3.72603	34	R0	i	early
TCGA-55-8301	59	alive	stage ib	male	white	not hispanic or latino	mx	n0	t2a	lung adenocarcinoma- not otherwise specified (nos)	not reported	not reported	not reported	not reported	not reported	2	1962	100	no	no	5.47945	-1	R0	i	early
TCGA-62-A470	84.0795	dead	stage ib	male	white	not hispanic or latino	m0	n0	t2	lung acinar adenocarcinoma	not reported	not reported	no	not reported	not reported	3	-1	30	no	no	1.64384	-1	R0	i	early
TCGA-78-7633	67.7068	dead	stage ib	male	white	not reported	m0	n0	t2	lung adenocarcinoma mixed subtype	not reported	not reported	no	not reported	not reported	4	1955	94	not reported	no	5.15068	47	R0	i	early
TCGA-44-2662	65.7918	alive	stage ib	male	white	not hispanic or latino	m0	n0	t2	lung adenocarcinoma- not otherwise specified (nos)	not reported	not reported	not reported	not reported	not reported	3	1956	56	not reported	no	3.06849	28	R0	i	early
TCGA-97-A4LX	81.9589	alive	stage ib	male	white	not hispanic or latino	m0	n0	t2a	lung adenocarcinoma mixed subtype	g12a	yes	no	not reported	not reported	3	1945	120	no	no	6.57534	40	not reported	i	early
TCGA-44-2656	59.6329	alive	stage ib	male	white	not hispanic or latino	m0	n0	t2	lung adenocarcinoma- not otherwise specified (nos)	not reported	not reported	not reported	not reported	not reported	4	1994	23	not reported	no	1.26027	15	not reported	i	early
TCGA-55-6969	52.7945	alive	stage ib	male	white	not reported	m0	n0	t2	lung adenocarcinoma- not otherwise specified (nos)	not reported	not reported	no	not reported	not reported	4	-1	-1	not reported	no	-1	-1	not reported	i	early
TCGA-91-6831	66.9479	alive	stage ib	male	white	not hispanic or latino	mx	n0	t2	lung adenocarcinoma- not otherwise specified (nos)	not reported	not reported	not reported	not reported	not reported	2	-1	-1	not reported	no	-1	-1	not reported	i	early
TCGA-NJ-A4YG	65.2384	alive	stage ib	male	white	not reported	m0	n0	t2	lung adenocarcinoma- not otherwise specified (nos)	not reported	not reported	not reported	not reported	not reported	4	1955	104	no	no	5.69863	52	not reported	i	early
TCGA-62-A46P	65.7342	dead	stage ib	male	white	not hispanic or latino	m0	n0	t2	lung adenocarcinoma mixed subtype	not reported	not reported	no	not reported	not reported	4	-1	40	no	no	2.19178	-1	R0	i	early
TCGA-55-6972	72.9452	dead	stage ib	male	white	not hispanic or latino	m0	n0	t2	lung papillary adenocarcinoma	not reported	not reported	no	not reported	not reported	2	-1	-1	not reported	no	-1	-1	R0	i	early
TCGA-44-7660	72.8603	alive	stage ib	male	white	not hispanic or latino	mx	n0	t2	lung adenocarcinoma- not otherwise specified (nos)	not reported	not reported	not reported	not reported	not reported	2	1949	124	not reported	no	6.79452	-1	not reported	i	early
TCGA-97-7937	65.5315	alive	stage ib	male	white	not hispanic or latino	mx	n0	t2a	lung micropapillary adenocarcinoma	not reported	no	yes	not reported	not reported	3	-1	35	not reported	no	1.91781	-1	not reported	i	early
TCGA-35-3615	57.7425	alive	stage ib	male	white	not hispanic or latino	m0	n0	t2	lung adenocarcinoma- not otherwise specified (nos)	not reported	not reported	no	not reported	not reported	1	-1	-1	not reported	no	-1	-1	R0	i	early
TCGA-64-5774	60.4356	alive	stage ib	male	white	not hispanic or latino	m0	n0	t2	lung adenocarcinoma- not otherwise specified (nos)	not reported	not reported	not reported	not reported	not reported	4	1959	45	not reported	no	2.46575	45	R0	i	early
TCGA-62-A46S	73.4932	dead	stage ib	male	white	not hispanic or latino	m0	n0	t2	lung papillary adenocarcinoma	not reported	not reported	no	not reported	not reported	4	-1	40	no	no	2.19178	-1	R0	i	early
TCGA-86-8585	57.3096	alive	stage ib	male	white	not hispanic or latino	m0	n0	t2a	lung solid pattern predominant adenocarcinoma	not reported	not reported	no	not reported	not reported	1	-1	-1	not reported	no	-1	-1	R0	i	early
TCGA-86-8673	61.8384	alive	stage ib	male	white	not hispanic or latino	m0	n0	t2	lung bronchioloalveolar carcinoma nonmucinous	not reported	not reported	not reported	not reported	not reported	2	1968	54	not reported	no	2.9589	-1	R0	i	early
TCGA-NJ-A4YP	52.3452	alive	stage ib	male	white	not hispanic or latino	m0	n0	t2a	lung papillary adenocarcinoma	not reported	not reported	no	not reported	not reported	5	-1	60	no	no	3.28767	-1	not reported	i	early
TCGA-91-6829	79.0164	dead	stage ib	male	white	not hispanic or latino	mx	n0	t2	lung bronchioloalveolar carcinoma nonmucinous	not reported	not reported	not reported	not reported	not reported	4	1940	94	not reported	no	5.17808	63	R0	i	early
TCGA-69-7761	85.0438	alive	stage ib	male	white	not hispanic or latino	mx	n0	t2a	lung acinar adenocarcinoma	not reported	not reported	yes	not reported	other	3	1955	20	not reported	no	1.09589	20	not reported	i	early
TCGA-78-7163	60.2795	alive	stage ib	male	white	not reported	m0	n0	t2	lung adenocarcinoma- not otherwise specified (nos)	not reported	not reported	no	not reported	not reported	4	1950	41	not reported	no	2.24658	41	R0	i	early
TCGA-78-7152	65.1562	dead	stage ib	male	white	not reported	m0	n0	t2	lung adenocarcinoma mixed subtype	not reported	not reported	no	not reported	not reported	4	1959	40	not reported	no	2.19178	40	R0	i	early
TCGA-44-A47B	79.0932	alive	stage ib	male	white	not hispanic or latino	m0	n0	t2a	lung adenocarcinoma- not otherwise specified (nos)	not reported	not reported	no	not reported	not reported	3	1956	4	no	no	0.246575	9	R0	i	early
TCGA-78-7155	68.1178	dead	stage ib	male	white	not reported	m0	n0	t2	lung adenocarcinoma- not otherwise specified (nos)	not reported	not reported	no	not reported	not reported	4	1957	48	not reported	no	2.63014	48	R0	i	early
TCGA-50-5939	85.5781	dead	stage ib	male	white	not hispanic or latino	m0	n0	t2	lung adenocarcinoma mixed subtype	not reported	not reported	not reported	not reported	not reported	3	-1	15	not reported	no	0.821918	-1	not reported	i	early
TCGA-78-7535	45.4	dead	stage ib	male	white	not reported	m0	n0	t2	lung adenocarcinoma- not otherwise specified (nos)	not reported	not reported	no	not reported	not reported	2	1972	35	not reported	no	1.91781	-1	R0	i	early
TCGA-44-2666	43.7534	dead	stage ib	male	white	hispanic or latino	m0	n0	t2	lung adenocarcinoma- not otherwise specified (nos)	not reported	not reported	not reported	not reported	not reported	2	1979	30	not reported	no	1.64384	-1	R0	i	early
TCGA-55-8091	75.0274	alive	stage ib	male	white	not hispanic or latino	mx	n0	t2	lung adenocarcinoma- not otherwise specified (nos)	not reported	not reported	no	not reported	not reported	3	-1	-1	not reported	no	-1	-1	R0	i	early
TCGA-55-6642	63.3068	alive	stage ib	male	white	not reported	mx	n0	t2	lung adenocarcinoma- not otherwise specified (nos)	not reported	not reported	not reported	not reported	not reported	2	1961	-1	not reported	no	-1	-1	R0	i	early
TCGA-78-7542	56.8849	dead	stage ib	male	white	not reported	m0	n0	t2	lung adenocarcinoma- not otherwise specified (nos)	not reported	not reported	no	not reported	not reported	2	1952	60	not reported	no	3.28767	-1	R0	i	early
TCGA-38-A44F	80.9151	alive	stage ib	male	white	not hispanic or latino	m0	n0	t2a	lung adenocarcinoma mixed subtype	not reported	not reported	no	not reported	not reported	3	1965	12	no	no	0.657534	12	R0	i	early
TCGA-44-2668	51.6603	dead	stage ib	male	white	not hispanic or latino	m0	n0	t2	lung adenocarcinoma- not otherwise specified (nos)	not reported	not reported	not reported	not reported	not reported	4	1979	60	not reported	no	3.28767	30	R0	i	early
TCGA-55-8614	76.5041	alive	stage ib	male	white	not hispanic or latino	mx	n0	t2a	lung adenocarcinoma- not otherwise specified (nos)	not reported	not reported	not reported	not reported	not reported	3	-1	40	no	no	2.19178	-1	R0	i	early
TCGA-86-7955	62.389	alive	stage ib	male	white	not hispanic or latino	m0	n0	t2a	lung adenocarcinoma- not otherwise specified (nos)	not reported	not reported	no	not reported	not reported	1	-1	-1	not reported	no	-1	-1	RX	i	early
TCGA-55-8207	73.6904	alive	stage ib	male	white	not hispanic or latino	mx	n0	t2a	lung acinar adenocarcinoma	not reported	not reported	not reported	not reported	not reported	3	-1	-1	no	no	-1	-1	R0	i	early
TCGA-55-8302	54.8247	alive	stage ib	male	white	not reported	mx	n0	t2	lung adenocarcinoma- not otherwise specified (nos)	not reported	not reported	not reported	not reported	not reported	2	1965	59	no	no	3.23288	-1	R0	i	early
TCGA-86-8358	44.9562	alive	stage ib	male	white	not hispanic or latino	m0	n0	t2a	lung adenocarcinoma- not otherwise specified (nos)	not reported	not reported	not reported	not reported	not reported	2	1992	20	not reported	no	1.09589	-1	R0	i	early
TCGA-55-6712	-0.00273973	dead	stage iia	male	white	not reported	mx	n1	t2a	lung adenocarcinoma- not otherwise specified (nos)	not reported	not reported	not reported	not reported	not reported	4	1970	-1	not reported	no	-1	33	R1	ii	early
TCGA-86-7713	70.6603	alive	stage iia	male	white	not hispanic or latino	m0	n0	t2b	lung adenocarcinoma- not otherwise specified (nos)	not reported	not reported	not reported	not reported	not reported	1	-1	-1	not reported	no	-1	-1	R0	ii	early
TCGA-55-A490	78.7068	dead	stage iia	male	white	not hispanic or latino	mx	n0	t2b	lung adenocarcinoma- not otherwise specified (nos)	g12c	yes	yes	not reported	not reported	3	1951	34	not reported	no	1.86301	34	R0	ii	early
TCGA-86-A4D0	48.2384	dead	stage iia	male	white	not hispanic or latino	m0	n0	t2b	lung adenocarcinoma- not otherwise specified (nos)	not reported	not reported	no	not reported	not reported	2	1983	-1	not reported	no	-1	-1	R0	ii	early
TCGA-86-8674	50.6274	alive	stage iia	male	white	not hispanic or latino	m0	n1	t2a	lung papillary adenocarcinoma	not reported	not reported	not reported	not reported	not reported	4	1982	37	not reported	no	2.05479	30	R0	ii	early
TCGA-55-6978	-0.00273973	dead	stage iia	male	white	not hispanic or latino	mx	n0	t2b	lung adenocarcinoma- not otherwise specified (nos)	not reported	not reported	no	not reported	not reported	1	-1	-1	not reported	no	-1	-1	not reported	ii	early
TCGA-86-6562	52.8795	dead	stage iia	male	white	not hispanic or latino	m0	n1	t2a	lung adenocarcinoma- not otherwise specified (nos)	not reported	not reported	not reported	not reported	not reported	1	-1	-1	not reported	no	-1	-1	R0	ii	early
TCGA-95-8494	67.8712	alive	stage iia	male	white	not hispanic or latino	m0	n1	t2a	lung adenocarcinoma- not otherwise specified (nos)	not reported	not reported	no	not reported	not reported	5	-1	-1	no	no	-1	-1	not reported	ii	early
TCGA-86-7711	70.463	dead	stage iia	male	white	hispanic or latino	m0	n1	t2a	lung adenocarcinoma- not otherwise specified (nos)	not reported	not reported	not reported	not reported	not reported	2	1960	50	not reported	no	2.73973	-1	R0	ii	early
TCGA-86-8055	79.7918	dead	stage iia	male	white	not hispanic or latino	m0	n1	t2a	lung adenocarcinoma- not otherwise specified (nos)	not reported	not reported	no	not reported	not reported	2	1955	60	not reported	no	3.28767	-1	R0	ii	early
TCGA-86-8279	46.663	alive	stage iia	male	white	not hispanic or latino	m0	n1	t2a	lung adenocarcinoma- not otherwise specified (nos)	not reported	not reported	not reported	not reported	not reported	1	-1	-1	yes	no	-1	-1	R0	ii	early
TCGA-MP-A4TI	72.7808	dead	stage iia	male	white	not hispanic or latino	m0	n1	t2a	lung adenocarcinoma- not otherwise specified (nos)	g12c	yes	yes	not reported	not reported	3	1955	35	not reported	no	1.91781	35	R0	ii	early
TCGA-73-4676	45.8795	dead	stage iia	male	white	not hispanic or latino	m0	n1	t2a	lung adenocarcinoma- not otherwise specified (nos)	not reported	not reported	no	not reported	not reported	4	1977	48	not reported	yes	2.63014	32	R0	ii	early
TCGA-53-A4EZ	63.5644	alive	stage iia	male	white	hispanic or latino	mx	n1	t2a	lung acinar adenocarcinoma	not reported	no	yes	not reported	not reported	3	1956	40	no	no	2.19178	40	RX	ii	early
TCGA-55-A48Y	69.5452	alive	stage iia	male	white	not hispanic or latino	m0	n0	t2b	lung adenocarcinoma- not otherwise specified (nos)	not reported	not reported	not reported	not reported	not reported	2	1962	50	not reported	no	2.73973	-1	R0	ii	early
TCGA-91-A4BC	59.0822	alive	stage iia	male	white	not hispanic or latino	mx	n0	t2b	lung adenocarcinoma- not otherwise specified (nos)	not reported	not reported	no	not reported	not reported	4	1976	30	not reported	no	1.64384	25	not reported	ii	early
TCGA-MP-A4TE	56.5123	dead	stage iia	male	white	not hispanic or latino	mx	n0	t2b	lung adenocarcinoma- not otherwise specified (nos)	g12c	yes	no	not reported	not reported	4	1970	40	no	no	2.19178	40	RX	ii	early
TCGA-55-7907	77.263	dead	stage iia	male	white	not hispanic or latino	mx	n1	t2a	lung adenocarcinoma- not otherwise specified (nos)	not reported	not reported	not reported	not reported	not reported	3	1954	80	not reported	no	4.38356	40	R0	ii	early
TCGA-49-6742	70.7918	dead	stage iia	male	white	not hispanic or latino	m0	n1	t2a	mucinous (colloid) carcinoma	not reported	no	not reported	not reported	not reported	3	-1	10	not reported	no	0.547945	-1	R0	ii	early
TCGA-97-8174	67.7397	dead	stage iia	male	white	not hispanic or latino	m0	n0	t2b	lung papillary adenocarcinoma	not reported	no	yes	not reported	not reported	3	1965	40	no	no	2.19178	20	not reported	ii	early
TCGA-91-A4BD	78.2027	alive	stage iia	male	white	not hispanic or latino	mx	n1	t1b	lung adenocarcinoma- not otherwise specified (nos)	not reported	not reported	no	not reported	not reported	3	-1	-1	no	no	-1	-1	RX	ii	early
TCGA-50-5932	75.2164	dead	stage iib	male	white	not hispanic or latino	m0	n1	t2	lung adenocarcinoma- not otherwise specified (nos)	not reported	not reported	not reported	not reported	not reported	-1	-1	-1	not reported	no	-1	-1	not reported	ii	early
TCGA-78-7150	59.9753	dead	stage iib	male	white	not reported	m0	n1	t2	lung adenocarcinoma- not otherwise specified (nos)	not reported	not reported	no	not reported	not reported	4	1963	37	not reported	no	2.0274	37	R0	ii	early
TCGA-44-8119	73.9808	alive	stage iib	male	white	not hispanic or latino	m0	n0	t3	lung adenocarcinoma- not otherwise specified (nos)	not reported	not reported	not reported	not reported	not reported	2	1961	50	no	no	2.73973	-1	not reported	ii	early
TCGA-MP-A4SY	61.5014	dead	stage iib	male	white	not hispanic or latino	m0	n1	t2	lung adenocarcinoma- not otherwise specified (nos)	not reported	not reported	no	not reported	not reported	4	-1	40	no	no	2.19178	-1	R0	ii	early
TCGA-95-7567	61.4712	alive	stage iib	male	white	not hispanic or latino	m0	n1	t2b	lung adenocarcinoma mixed subtype	not reported	not reported	not reported	not reported	not reported	4	1970	-1	not reported	no	-1	41	not reported	ii	early
TCGA-62-A471	64.9014	alive	stage iib	male	white	not hispanic or latino	m0	n1	t2b	lung adenocarcinoma- not otherwise specified (nos)	not reported	not reported	no	not reported	not reported	4	-1	30	no	no	1.64384	-1	R0	ii	early
TCGA-MP-A4SW	53.8082	dead	stage iib	male	white	not reported	m0	n1	t2	lung adenocarcinoma- not otherwise specified (nos)	not reported	not reported	no	not reported	not reported	3	1967	15	no	no	0.821918	15	R0	ii	early
TCGA-64-5815	74.7397	alive	stage iib	male	white	not hispanic or latino	m0	n1	t2	lung adenocarcinoma mixed subtype	not reported	not reported	yes	not reported	not reported	3	-1	30	not reported	no	1.64384	-1	R0	ii	early
TCGA-69-7978	59.6849	alive	stage iib	male	white	not hispanic or latino	mx	n1	t2b	lung adenocarcinoma mixed subtype	not reported	not reported	yes	not reported	other	2	-1	80	not reported	no	4.38356	-1	not reported	ii	early
TCGA-50-8459	68.1068	alive	stage iib	male	white	not hispanic or latino	m0	n0	t3	mucinous (colloid) carcinoma	g12c	yes	yes	not reported	not reported	2	-1	10	no	no	0.547945	-1	not reported	ii	early
TCGA-55-6983	-0.00273973	alive	stage iib	male	white	not hispanic or latino	m0	n1	t2	mucinous (colloid) carcinoma	not reported	not reported	no	not reported	not reported	4	-1	60	not reported	no	3.28767	-1	R0	ii	early
TCGA-44-6146	64.0493	alive	stage iib	male	white	not hispanic or latino	m0	n0	t3	lung mucinous adenocarcinoma	not reported	not reported	not reported	not reported	not reported	3	-1	15	not reported	no	0.821918	-1	not reported	ii	early
TCGA-69-8453	77.8438	alive	stage iib	male	white	not hispanic or latino	mx	n0	t3	mucinous (colloid) carcinoma	not reported	not reported	not reported	not reported	not reported	3	-1	12	no	no	0.657534	-1	not reported	ii	early
TCGA-55-7994	81.8027	alive	stage iib	male	white	not hispanic or latino	mx	n0	t3	lung adenocarcinoma- not otherwise specified (nos)	not reported	not reported	no	not reported	not reported	2	-1	28	not reported	no	1.53425	-1	R0	ii	early
TCGA-69-7760	73.3616	alive	stage iib	male	white	not hispanic or latino	m0	n0	t3	lung adenocarcinoma mixed subtype	not reported	not reported	yes	not reported	not reported	1	-1	-1	not reported	no	-1	-1	not reported	ii	early
TCGA-86-A4JF	56.1397	dead	stage iib	male	white	not hispanic or latino	m0	n0	t3	lung adenocarcinoma- not otherwise specified (nos)	not reported	not reported	no	not reported	not reported	4	-1	-1	not reported	no	-1	-1	R0	ii	early
TCGA-62-A472	70.9397	alive	stage iib	male	white	not hispanic or latino	m0	n0	t3	lung adenocarcinoma- not otherwise specified (nos)	not reported	not reported	no	not reported	not reported	2	-1	60	no	no	3.28767	-1	R0	ii	early
TCGA-55-8092	75.6082	dead	stage iib	male	white	not hispanic or latino	mx	n0	t3	lung adenocarcinoma- not otherwise specified (nos)	not reported	not reported	not reported	not reported	not reported	4	1972	40	not reported	no	2.19178	40	R0	ii	early
TCGA-91-7771	62.811	alive	stage iib	male	white	not hispanic or latino	mx	n0	t3	lung adenocarcinoma- not otherwise specified (nos)	not reported	not reported	no	not reported	not reported	4	-1	75	not reported	no	4.10959	-1	not reported	ii	early
TCGA-86-8054	61.874	alive	stage iib	male	white	not hispanic or latino	m0	n1	t2b	lung acinar adenocarcinoma	not reported	not reported	no	not reported	not reported	2	1994	9	not reported	no	0.493151	-1	R0	ii	early
TCGA-78-7148	71.2055	dead	stage iib	male	white	not reported	m0	n1	t2	lung adenocarcinoma mixed subtype	not reported	not reported	no	not reported	not reported	2	1944	57	not reported	no	3.12329	-1	R0	ii	early
TCGA-38-4629	68.7781	dead	stage iib	male	white	not hispanic or latino	m0	n0	t3	lung adenocarcinoma- not otherwise specified (nos)	not reported	not reported	no	not reported	not reported	4	-1	100	not reported	no	5.47945	-1	R0	ii	early
TCGA-55-7284	74.211	dead	stage iib	male	white	not hispanic or latino	mx	n0	t3	lung bronchioloalveolar carcinoma nonmucinous	not reported	not reported	not reported	not reported	not reported	3	-1	-1	not reported	no	-1	-1	R0	ii	early
TCGA-78-7166	84.5726	dead	stage iib	male	white	not reported	m0	n1	t2	lung adenocarcinoma- not otherwise specified (nos)	not reported	not reported	no	not reported	not reported	3	1934	38	not reported	no	2.08219	38	R0	ii	early
TCGA-86-8672	59.4027	dead	stage iib	male	white	not hispanic or latino	m0	n0	t3	lung adenocarcinoma- not otherwise specified (nos)	not reported	not reported	not reported	not reported	not reported	1	-1	-1	not reported	no	-1	-1	R0	ii	early
TCGA-44-A47F	74.3068	alive	stage iib	male	white	not hispanic or latino	m0	n1	t2b	lung adenocarcinoma- not otherwise specified (nos)	not reported	not reported	not reported	not reported	not reported	3	1955	20	no	no	1.09589	32	not reported	ii	early
TCGA-62-8398	55.3342	dead	stage iiia	male	white	not hispanic or latino	m0	n2	t2	lung adenocarcinoma mixed subtype	not reported	not reported	no	not reported	not reported	4	1970	20	no	no	1.09589	29	R0	iii	late
TCGA-55-1594	68.5151	alive	stage iiia	male	white	not hispanic or latino	m0	n2	t2	lung adenocarcinoma- not otherwise specified (nos)	not reported	not reported	not reported	not reported	not reported	2	1965	-1	not reported	no	-1	-1	R0	iii	late
TCGA-MP-A4TD	71.1863	dead	stage iiia	male	white	not reported	m0	n2	t2	lung adenocarcinoma- not otherwise specified (nos)	not reported	not reported	no	not reported	not reported	3	-1	20	no	no	1.09589	-1	RX	iii	late
TCGA-MP-A4TC	78.0027	dead	stage iiia	male	white	not hispanic or latino	m0	n2	t1	lung adenocarcinoma- not otherwise specified (nos)	not reported	not reported	no	not reported	not reported	3	1944	125	no	no	6.84932	32	R0	iii	late
TCGA-49-4494	77.7726	dead	stage iiia	male	white	not hispanic or latino	m0	n2	t3	lung adenocarcinoma- not otherwise specified (nos)	not reported	not reported	not reported	not reported	not reported	3	1930	50	not reported	no	2.73973	25	R0	iii	late
TCGA-55-8505	62.126	alive	stage iiia	male	white	not hispanic or latino	mx	n2	t1a	lung adenocarcinoma- not otherwise specified (nos)	not reported	not reported	not reported	not reported	not reported	1	-1	-1	not reported	no	-1	-1	R0	iii	late
TCGA-78-7154	72.5507	dead	stage iiia	male	white	not reported	m0	n2	t3	lung adenocarcinoma- not otherwise specified (nos)	not reported	not reported	no	not reported	not reported	4	1948	112	not reported	no	6.16438	45	R0	iii	late
TCGA-35-5375	61.9945	alive	stage iiia	male	white	not hispanic or latino	m0	n2	t2	lung adenocarcinoma- not otherwise specified (nos)	not reported	not reported	not reported	not reported	not reported	4	1971	35	not reported	no	1.91781	35	R0	iii	late
TCGA-55-7227	77.9671	dead	stage iiia	male	white	not hispanic or latino	mx	n1	t3	lung adenocarcinoma- not otherwise specified (nos)	not reported	not reported	not reported	not reported	not reported	3	1953	-1	not reported	no	-1	40	R0	iii	late
TCGA-55-7727	71.0384	alive	stage iiia	male	white	not hispanic or latino	mx	n2	t1a	lung adenocarcinoma- not otherwise specified (nos)	not reported	not reported	not reported	not reported	not reported	2	-1	-1	not reported	no	-1	-1	R0	iii	late
TCGA-73-4659	66.4466	dead	stage iiia	male	white	not hispanic or latino	m0	n2	t2	lung adenocarcinoma- not otherwise specified (nos)	not reported	not reported	no	not reported	not reported	3	1974	12	not reported	no	0.657534	12	R0	iii	late
TCGA-64-5779	61.1096	alive	stage iiia	male	white	not hispanic or latino	m0	n2	t2	lung acinar adenocarcinoma	not reported	not reported	not reported	not reported	not reported	4	1969	40	not reported	no	2.19178	40	R0	iii	late
TCGA-78-7536	70.0219	dead	stage iiia	male	white	not reported	m0	n2	t2	lung adenocarcinoma- not otherwise specified (nos)	not reported	not reported	no	not reported	not reported	4	1949	44	not reported	no	2.41096	44	R0	iii	late
TCGA-55-8615	67.9068	alive	stage iiia	male	white	not hispanic or latino	mx	n2	t3	lung adenocarcinoma- not otherwise specified (nos)	not reported	not reported	not reported	not reported	not reported	2	1966	67	no	no	3.67123	-1	R0	iii	late
TCGA-50-5930	47.2274	dead	stage iiia	male	white	not hispanic or latino	m0	n2	t2	lung adenocarcinoma mixed subtype	not reported	not reported	not reported	not reported	not reported	-1	-1	-1	not reported	no	-1	-1	not reported	iii	late
TCGA-73-4675	59.2164	dead	stage iiia	male	white	not hispanic or latino	m0	n1	t3	lung adenocarcinoma- not otherwise specified (nos)	not reported	not reported	no	not reported	not reported	4	1969	41	not reported	no	2.24658	41	RX	iii	late
TCGA-97-8176	63.4795	dead	stage iiia	male	white	not hispanic or latino	m0	n1	t3	lung acinar adenocarcinoma	g12s	yes	yes	not reported	not reported	4	1971	40	yes	no	2.19178	40	R0	iii	late
TCGA-49-6745	82.5562	alive	stage iiia	male	white	not reported	m0	n2	t2a	lung adenocarcinoma- not otherwise specified (nos)	not reported	no	yes	not reported	not reported	4	-1	20	not reported	no	1.09589	-1	not reported	iii	late
TCGA-50-5072	74.0712	dead	stage iiia	male	white	not hispanic or latino	m0	n2	t2	lung adenocarcinoma- not otherwise specified (nos)	not reported	not reported	yes	not reported	not reported	3	-1	15	not reported	yes	0.821918	-1	not reported	iii	late
TCGA-91-6848	59.8055	alive	stage iiia	male	white	not hispanic or latino	mx	n2	t2	lung adenocarcinoma- not otherwise specified (nos)	not reported	no	not reported	not reported	not reported	4	-1	-1	not reported	no	-1	-1	not reported	iii	late
TCGA-62-8399	62.8822	alive	stage iiia	male	white	not hispanic or latino	m0	n2	t2	lung papillary adenocarcinoma	not reported	not reported	no	not reported	not reported	4	-1	70	no	no	3.83562	-1	R0	iii	late
TCGA-50-5936	58.1863	dead	stage iiia	male	white	not hispanic or latino	m0	n2	t2	mucinous (colloid) carcinoma	g12c	yes	yes	not reported	not reported	-1	-1	-1	not reported	no	-1	-1	not reported	iii	late
TCGA-86-8359	52.2959	dead	stage iiia	male	white	not hispanic or latino	m0	n2	t3	lung adenocarcinoma- not otherwise specified (nos)	not reported	not reported	not reported	not reported	not reported	2	1982	36	not reported	no	1.9726	-1	R0	iii	late
TCGA-64-5775	71.3918	dead	stage iiia	male	white	not hispanic or latino	m0	n0	t4	lung adenocarcinoma- not otherwise specified (nos)	not reported	not reported	not reported	not reported	not reported	2	1950	110	not reported	yes	6.0274	-1	R0	iii	late
TCGA-50-5933	72.2658	dead	stage iiib	male	white	not hispanic or latino	m0	n2	t4	lung adenocarcinoma- not otherwise specified (nos)	not reported	not reported	not reported	not reported	not reported	-1	-1	-1	not reported	no	-1	-1	not reported	iii	late
TCGA-78-7149	72.0137	alive	stage iiib	male	white	not reported	m0	n0	t4	lung adenocarcinoma mixed subtype	not reported	not reported	no	not reported	not reported	2	1950	115	not reported	no	6.30137	-1	R0	iii	late
TCGA-93-A4JN	71.9808	alive	stage iv	male	white	not hispanic or latino	m1a	n0	t2a	lung acinar adenocarcinoma	not reported	no	yes	not reported	not reported	3	1971	40	no	no	2.19178	20	RX	iv	late
TCGA-55-6968	61.2164	dead	stage iv	male	white	not hispanic or latino	m1	n0	t1	lung adenocarcinoma- not otherwise specified (nos)	not reported	not reported	not reported	not reported	not reported	2	-1	-1	not reported	no	-1	-1	not reported	iv	late
TCGA-86-7701	66.326	alive	stage iv	male	white	not hispanic or latino	m1	n0	t2	lung adenocarcinoma- not otherwise specified (nos)	not reported	not reported	not reported	not reported	not reported	1	-1	-1	not reported	no	-1	-1	R0	iv	late
TCGA-55-8094	51.789	alive	stage iv	male	white	not hispanic or latino	m1b	n0	t2b	lung adenocarcinoma- not otherwise specified (nos)	not reported	not reported	yes	not reported	not reported	4	1976	70	not reported	no	3.83562	35	R0	iv	late
TCGA-78-7167	77.5205	dead	stage iv	male	white	not reported	m1	n0	t2	lung papillary adenocarcinoma	not reported	not reported	no	not reported	not reported	2	1937	64	not reported	no	3.50685	-1	R0	iv	late
TCGA-64-1680	63.7452	alive	stage iv	male	white	not hispanic or latino	m1	n2	t2a	lung adenocarcinoma mixed subtype	not reported	not reported	not reported	not reported	not reported	3	1962	50	not reported	no	2.73973	20	R0	iv	late
TCGA-55-8512	41.8247	dead	stage iv	male	white	not hispanic or latino	m1b	n1	t1a	lung bronchioloalveolar carcinoma nonmucinous	not reported	not reported	not reported	not reported	not reported	2	1989	19	not reported	no	1.0411	-1	R0	iv	late
TCGA-55-8620	60.5233	dead	stage iv	male	white	not hispanic or latino	m1b	n1	t1a	lung adenocarcinoma- not otherwise specified (nos)	not reported	not reported	no	not reported	not reported	4	1965	154	yes	no	8.43836	47	R0	iv	late
TCGA-78-7156	62.2466	dead	stage iv	male	white	not reported	m1	n1	t4	lung adenocarcinoma mixed subtype	not reported	not reported	no	not reported	not reported	3	1961	84	not reported	no	4.60274	28	R0	iv	late
TCGA-78-7160	61.3288	dead	stage iv	male	white	not reported	m1	n2	t4	lung adenocarcinoma mixed subtype	not reported	not reported	no	not reported	not reported	4	1963	43	not reported	no	2.4	35	R0	iv	late
TCGA-50-5045	57.4274	dead	not reported	female	black or african american	not hispanic or latino	m0	n1	t2	lung adenocarcinoma- not otherwise specified (nos)	not reported	not reported	not reported	not reported	not reported	-1	-1	-1	not reported	no	-1	-1	not reported	not reported	not reported
TCGA-49-AARQ	41.274	alive	stage i	female	black or african american	not hispanic or latino	mx	n0	t2	lung adenocarcinoma- not otherwise specified (nos)	not reported	not reported	not reported	not reported	not reported	4	-1	60	no	no	3.28767	-1	R0	i	early
TCGA-99-8028	50.8	alive	stage ia	female	black or african american	not hispanic or latino	m0	n0	t1a	lung adenocarcinoma- not otherwise specified (nos)	g12c	yes	yes	not reported	not reported	4	1981	30	no	no	1.64384	30	R0	i	early
TCGA-49-AARE	51.7616	dead	stage ia	female	black or african american	not hispanic or latino	mx	n0	t1	lung adenocarcinoma- not otherwise specified (nos)	not reported	not reported	not reported	not reported	not reported	4	1980	15	no	no	0.821918	15	R0	i	early
TCGA-67-3771	77.8247	alive	stage ia	female	black or african american	not hispanic or latino	m0	n0	t1	lung adenocarcinoma- not otherwise specified (nos)	not reported	not reported	no	not reported	not reported	4	-1	-1	not reported	no	-1	-1	R0	i	early
TCGA-49-AARO	39.8	alive	stage ia	female	black or african american	not hispanic or latino	mx	n0	t1a	lung papillary adenocarcinoma	not reported	not reported	not reported	not reported	not reported	2	-1	-1	no	no	-1	-1	R0	i	early
TCGA-4B-A93V	52.1507	dead	stage ia	female	black or african american	not hispanic or latino	m0	n0	t1b	lung adenocarcinoma mixed subtype	not reported	not reported	not reported	not reported	not reported	4	1984	30	yes	no	1.64384	29	R0	i	early
TCGA-S2-AA1A	68.2274	alive	stage ia	female	black or african american	not hispanic or latino	m0	n0	t1b	lung bronchioloalveolar carcinoma mucinous	not reported	not reported	no	not reported	not reported	3	1957	95	no	no	5.20548	38	R0	i	early
TCGA-44-5645	61.5644	alive	stage ia	female	black or african american	not hispanic or latino	not reported	nx	t1	lung adenocarcinoma- not otherwise specified (nos)	not reported	not reported	not reported	not reported	not reported	3	1963	5	not reported	no	0.273973	10	not reported	i	early
TCGA-55-A57B	80.6904	alive	stage ia	female	black or african american	not hispanic or latino	m0	n0	t1b	lung adenocarcinoma mixed subtype	not reported	not reported	no	not reported	not reported	1	-1	-1	not reported	no	-1	-1	R0	i	early
TCGA-49-AARN	56.4521	dead	stage ia	female	black or african american	not hispanic or latino	mx	n0	t1	lung adenocarcinoma- not otherwise specified (nos)	not reported	not reported	not reported	not reported	not reported	5	-1	-1	no	no	-1	-1	R0	i	early
TCGA-NJ-A4YF	50.9151	alive	stage ia	female	black or african american	not hispanic or latino	m0	n0	t1	lung adenocarcinoma mixed subtype	not reported	not reported	no	not reported	not reported	3	-1	30	not reported	no	1.64384	-1	not reported	i	early
TCGA-50-8457	63.1644	alive	stage ia	female	black or african american	not hispanic or latino	m0	n0	t1a	lung adenocarcinoma mixed subtype	g12a	yes	yes	not reported	not reported	4	-1	30	no	no	1.64384	-1	not reported	i	early
TCGA-99-AA5R	70.6247	alive	stage ia	female	black or african american	not hispanic or latino	m0	n0	t1a	lung adenocarcinoma- not otherwise specified (nos)	g12c	yes	yes	not reported	not reported	2	1967	46	no	no	2.52055	-1	R0	i	early
TCGA-55-7913	61.1671	dead	stage ia	female	black or african american	not hispanic or latino	mx	n0	t1b	lung adenocarcinoma- not otherwise specified (nos)	not reported	no	yes	not reported	not reported	2	1971	40	not reported	no	2.19178	-1	R0	i	early
TCGA-L9-A8F4	64.7041	alive	stage ib	female	black or african american	not hispanic or latino	mx	n0	t2a	lung adenocarcinoma- not otherwise specified (nos)	not reported	not reported	no	not reported	not reported	2	1973	14	yes	no	0.767123	-1	R0	i	early
TCGA-55-8514	70.1589	alive	stage ib	female	black or african american	not hispanic or latino	mx	n0	t2a	lung adenocarcinoma- not otherwise specified (nos)	not reported	not reported	not reported	not reported	not reported	4	1971	20	no	no	1.09589	40	R0	i	early
TCGA-44-A479	74.0384	alive	stage ib	female	black or african american	not hispanic or latino	mx	n0	t2	lung adenocarcinoma- not otherwise specified (nos)	not reported	not reported	yes	not reported	not reported	4	1962	40	no	no	2.19178	40	R0	i	early
TCGA-49-AAQV	64.0274	dead	stage ii	female	black or african american	not hispanic or latino	mx	n1	t1	lung adenocarcinoma mixed subtype	not reported	not reported	yes	not reported	exon 19 deletion	1	-1	-1	no	no	-1	-1	R0	ii	early
TCGA-55-7910	50.1068	alive	stage iia	female	black or african american	not hispanic or latino	m0	n0	t2b	lung adenocarcinoma- not otherwise specified (nos)	not reported	not reported	not reported	not reported	not reported	4	1996	15	not reported	no	0.821918	15	R0	ii	early
TCGA-69-8253	59.6466	alive	stage iia	female	black or african american	not hispanic or latino	mx	n1	t1a	lung adenocarcinoma mixed subtype	not reported	not reported	no	not reported	not reported	4	1972	7	no	no	0.427397	39	not reported	ii	early
TCGA-55-8508	60.7096	alive	stage iia	female	black or african american	not hispanic or latino	mx	n1	t2a	mucinous (colloid) carcinoma	not reported	not reported	not reported	not reported	not reported	2	-1	-1	no	no	-1	-1	R0	ii	early
TCGA-69-A59K	60.5288	alive	stage iib	female	black or african american	not hispanic or latino	m0	n0	t3	lung adenocarcinoma mixed subtype	not reported	not reported	yes	not reported	not reported	4	1999	25	no	no	1.36986	13	not reported	ii	early
TCGA-49-4510	51.4027	dead	stage iib	female	black or african american	not hispanic or latino	m0	n1	t2	lung adenocarcinoma- not otherwise specified (nos)	not reported	not reported	not reported	not reported	not reported	2	-1	55	not reported	no	3.0411	-1	R0	ii	early
TCGA-50-6594	79.2438	dead	stage iiia	female	black or african american	not hispanic or latino	m0	n2	t3	lung adenocarcinoma- not otherwise specified (nos)	not reported	no	not reported	not reported	not reported	4	-1	-1	not reported	no	-1	-1	not reported	iii	late
TCGA-86-7714	61.9699	dead	stage iiia	female	black or african american	not hispanic or latino	m0	n2	t1b	lung adenocarcinoma mixed subtype	not reported	not reported	no	not reported	not reported	2	1968	43	not reported	no	2.35616	-1	R0	iii	late
TCGA-91-6849	75.8247	alive	stage iiia	female	black or african american	not hispanic or latino	mx	n2	t2	lung adenocarcinoma- not otherwise specified (nos)	not reported	not reported	yes	not reported	not reported	3	1946	30	not reported	no	1.64384	30	not reported	iii	late
TCGA-99-8025	72.9699	alive	stage iiia	female	black or african american	not hispanic or latino	m0	n2	t3	lung adenocarcinoma- not otherwise specified (nos)	not reported	no	yes	not reported	not reported	4	1958	20	no	no	1.09589	40	R0	iii	late
TCGA-L9-A5IP	40.2219	dead	stage iv	female	black or african american	not hispanic or latino	m1b	n2	t3	lung adenocarcinoma- not otherwise specified (nos)	not reported	not reported	yes	not reported	not reported	4	-1	-1	no	no	-1	-1	R1	iv	late
TCGA-69-7765	56.5068	alive	not reported	male	black or african american	not hispanic or latino	mx	n0	t4	lung adenocarcinoma mixed subtype	not reported	not reported	no	not reported	other	4	1981	-1	not reported	no	-1	30	not reported	not reported	not reported
TCGA-49-AARR	68.3342	alive	stage ia	male	black or african american	not hispanic or latino	mx	n0	t1	lung adenocarcinoma- not otherwise specified (nos)	not reported	not reported	not reported	not reported	not reported	3	-1	-1	no	no	-1	-1	R0	i	early
TCGA-55-7570	60.8712	alive	stage ia	male	black or african american	not hispanic or latino	mx	n0	t1a	lung adenocarcinoma- not otherwise specified (nos)	not reported	not reported	not reported	not reported	not reported	2	1971	-1	not reported	no	-1	-1	R0	i	early
TCGA-49-AAR0	57.3479	alive	stage ia	male	black or african american	not hispanic or latino	mx	n0	t1	lung adenocarcinoma- not otherwise specified (nos)	not reported	not reported	not reported	not reported	not reported	2	-1	37	no	no	2.0274	-1	R0	i	early
TCGA-44-6778	59.5205	alive	stage ia	male	black or african american	not reported	mx	n0	t1	lung adenocarcinoma- not otherwise specified (nos)	not reported	not reported	not reported	not reported	not reported	4	1974	15	not reported	no	0.821918	30	not reported	i	early
TCGA-44-7671	64.4877	alive	stage ib	male	black or african american	not hispanic or latino	m0	n0	t2a	lung adenocarcinoma mixed subtype	not reported	not reported	not reported	not reported	not reported	3	-1	-1	not reported	no	-1	-1	not reported	i	early
TCGA-50-5066	72.2877	alive	stage ib	male	black or african american	not hispanic or latino	m0	n0	t2	lung adenocarcinoma mixed subtype	not reported	no	yes	not reported	not reported	1	-1	-1	not reported	no	-1	-1	R0	i	early
TCGA-55-7576	54.5671	alive	stage ib	male	black or african american	not hispanic or latino	m0	n0	t2a	lung adenocarcinoma- not otherwise specified (nos)	not reported	not reported	not reported	not reported	not reported	2	1972	-1	not reported	no	-1	-1	R0	i	early
TCGA-44-8120	58.0493	alive	stage ib	male	black or african american	not hispanic or latino	m0	n0	t2a	lung adenocarcinoma- not otherwise specified (nos)	not reported	not reported	not reported	not reported	not reported	5	1981	30	no	no	1.64384	-1	not reported	i	early
TCGA-49-AAR2	64.326	alive	stage ib	male	black or african american	not hispanic or latino	mx	n0	t2	lung acinar adenocarcinoma	not reported	not reported	not reported	not reported	not reported	4	-1	-1	no	no	-1	-1	R0	i	early
TCGA-44-7669	59.9808	dead	stage iia	male	black or african american	not hispanic or latino	mx	n1	t1b	lung adenocarcinoma- not otherwise specified (nos)	not reported	not reported	not reported	not reported	not reported	2	1970	20	not reported	no	1.09589	-1	not reported	ii	early
TCGA-L9-A7SV	69.3096	alive	stage iia	male	black or african american	not hispanic or latino	m0	n1	t2a	lung adenocarcinoma- not otherwise specified (nos)	not reported	not reported	no	not reported	not reported	3	1959	93	no	no	5.09589	31	R0	ii	early
TCGA-L9-A50W	75.1068	dead	stage iia	male	black or african american	not hispanic or latino	mx	n1	t1b	lung adenocarcinoma mixed subtype	not reported	not reported	yes	not reported	t790m	3	1967	19	no	no	1.0411	19	R0	ii	early
TCGA-L9-A743	56.9315	alive	stage iia	male	black or african american	not hispanic or latino	m0	n1	t2a	lung adenocarcinoma- not otherwise specified (nos)	not reported	not reported	no	not reported	not reported	2	1986	40	no	no	2.21918	-1	R0	ii	early
TCGA-95-7562	71.2329	dead	stage iia	male	black or african american	not hispanic or latino	m0	n1	t2a	lung adenocarcinoma- not otherwise specified (nos)	not reported	not reported	not reported	not reported	not reported	3	1973	10	no	no	0.547945	10	RX	ii	early
TCGA-MN-A4N1	60.1068	alive	stage iia	male	black or african american	not hispanic or latino	m0	n1	t2a	lung adenocarcinoma- not otherwise specified (nos)	not reported	not reported	yes	not reported	not reported	2	1967	-1	no	no	-1	-1	R0	ii	early
TCGA-49-AAR3	69.7781	alive	stage iib	male	black or african american	not hispanic or latino	mx	n1	t2	lung adenocarcinoma- not otherwise specified (nos)	not reported	not reported	not reported	not reported	not reported	-1	-1	-1	no	no	-1	-1	R0	ii	early
TCGA-49-AAR9	61.6712	dead	stage iib	male	black or african american	not hispanic or latino	mx	n0	t3	lung adenocarcinoma- not otherwise specified (nos)	not reported	not reported	not reported	not reported	not reported	2	-1	-1	no	no	-1	-1	R0	ii	early
TCGA-73-A9RS	41.5397	dead	stage iib	male	black or african american	not hispanic or latino	m0	n0	t3	lung adenocarcinoma- not otherwise specified (nos)	not reported	no	yes	not reported	not reported	2	1990	11	yes	no	0.60274	-1	R0	ii	early
TCGA-44-5643	53.2219	alive	stage iiia	male	black or african american	not hispanic or latino	m0	n2	t2b	lung adenocarcinoma- not otherwise specified (nos)	not reported	not reported	not reported	not reported	not reported	2	-1	20	not reported	no	1.09589	-1	not reported	iii	late
TCGA-49-AAR4	51.8877	dead	stage iiia	male	black or african american	not hispanic or latino	mx	n2	t2	lung adenocarcinoma- not otherwise specified (nos)	not reported	not reported	not reported	not reported	not reported	2	-1	35	yes	no	1.91781	-1	R0	iii	late
TCGA-NJ-A7XG	49.663	alive	stage iiia	male	black or african american	not hispanic or latino	m0	n1	t4	lung adenocarcinoma- not otherwise specified (nos)	not reported	no	yes	not reported	other	3	-1	-1	no	no	-1	-1	not reported	iii	late
TCGA-38-4632	42.2411	dead	stage iv	male	black or african american	not hispanic or latino	m1	n1	t2	lung adenocarcinoma- not otherwise specified (nos)	not reported	not reported	no	not reported	not reported	4	-1	10	not reported	no	0.547945	-1	R0	iv	late
