# Supplementary material for: Disparities in Lung Cancer: miRNA Isoform Characterization in Lung Adenocarcinoma
Source: Preprints.org preprint supplement (doi:10.20944/preprints202112.0501.v1), 2021-12-31
Supplement: Supplementary file 1 [file supplementary › Table S2.xlsx]

## Sheet: Table S1
Label	pre-miRNA	MI_ID	miRNA	MIMAT_ID	End_5p	End_3p	Start	End	Chr	Strand	No_mods	Isoform_seq	Ref_iso_seq	Known_DNA_SNV	Unknown_SNV	Known_RNA_Editing	black or african american (normal)	black or african american (tumor)	white (normal)	white (tumor)	Isoform_seed_region	Arm	GM white (normal)	GM white (tumor)	GM black or african american (normal)	GM black or african american (tumor)	Rank black or african american (normal)	Rank black or african american (tumor)	Rank white (normal)	Rank white (tumor)	Group
let-7a-2-3p__let-7a-2__0__-1__21M	hsa-let-7a-2	MI0000061	hsa-let-7a-2-3p	MIMAT0010195	0	-1	122146524	122146544	chr11	-	0	CTGTACAGCCTCCTAGCTTTC	CTGTACAGCCTCCTAGCTTTC	not reported	not reported	not reported	0	1	0	1	TGTACAG	3p	1.42801	3.0305	1.31262	2.83851	0.147438	0.53368	0.163382	0.565747	[W (T)] and [B/AA (T)]
let-7a-2-3p__let-7a-2__0__0__22M	hsa-let-7a-2	MI0000061	hsa-let-7a-2-3p	MIMAT0010195	0	0	122146523	122146544	chr11	-	0	CTGTACAGCCTCCTAGCTTTCC	CTGTACAGCCTCCTAGCTTTCC	not reported	not reported	not reported	0	1	1	1	TGTACAG	3p	2.35739	5.57038	1.72453	4.87812	0.239341	0.684163	0.464171	0.721784	[W (N)] and [W (T)] and [B/AA (T)]
let-7a-3p__let-7a-1__0__-1__20M	hsa-let-7a-1	MI0000060	hsa-let-7a-3p	MIMAT0004481	0	-1	94176013	94176032	chr9	+	0	CTATACAATCTACTGTCTTT	CTATACAATCTACTGTCTTT	not reported	not reported	not reported	1	1	1	1	TATACAA	3p	6.13133	5.25473	8.02469	5.66556	0.760301	0.718022	0.754031	0.708527	[W (N)] and [W (T)] and [B/AA (N)] and [B/AA (T)]
let-7a-3p__let-7a-1__0__+1__21MA	hsa-let-7a-1	MI0000060	hsa-let-7a-3p	MIMAT0004481	0	1	94176013	94176034	chr9	+	1	CTATACAATCTACTGTCTTTCA	CTATACAATCTACTGTCTTTCC	COSV100762400,TCGA=22:C-A	not reported	not reported	1	0	1	0	TATACAA	3p	2.03608	1.52716	3.22187	1.60651	0.556969	0.230383	0.365102	0.20387	[W (N)] and [B/AA (N)]
let-7a-3p__let-7a-1__0__+1__22M	hsa-let-7a-1	MI0000060	hsa-let-7a-3p	MIMAT0004481	0	1	94176013	94176034	chr9	+	0	CTATACAATCTACTGTCTTTCC	CTATACAATCTACTGTCTTTCC	not reported	not reported	not reported	1	1	1	1	TATACAA	3p	5.51319	6.29769	8.0484	5.86502	0.76048	0.725188	0.734683	0.742924	[W (N)] and [W (T)] and [B/AA (N)] and [B/AA (T)]
let-7a-3p__let-7a-1__0__0__21M	hsa-let-7a-1	MI0000060	hsa-let-7a-3p	MIMAT0004481	0	0	94176013	94176033	chr9	+	0	CTATACAATCTACTGTCTTTC	CTATACAATCTACTGTCTTTC	not reported	not reported	not reported	1	1	1	1	TATACAA	3p	10.2018	10.2932	18.1674	10.3823	0.849337	0.801147	0.823003	0.808671	[W (N)] and [W (T)] and [B/AA (N)] and [B/AA (T)]
let-7a-5p__let-7a-1__-1__-1__22M	hsa-let-7a-1	MI0000060	hsa-let-7a-5p	MIMAT0000062	-1	-1	94175961	94175982	chr9	+	0	ATGAGGTAGTAGGTTGTATAGT	ATGAGGTAGTAGGTTGTATAGT	not reported	not reported	not reported	1	0	1	0	TGAGGTA	5p	2.91611	1.76652	3.30219	1.93465	0.56521	0.311537	0.565926	0.269437	[W (N)] and [B/AA (N)]
let-7a-5p__let-7a-1__-1__-2__21M	hsa-let-7a-1	MI0000060	hsa-let-7a-5p	MIMAT0000062	-1	-2	94175961	94175981	chr9	+	0	ATGAGGTAGTAGGTTGTATAG	ATGAGGTAGTAGGTTGTATAG	not reported	not reported	not reported	1	0	1	0	TGAGGTA	5p	2.24839	1.62037	2.21752	1.53308	0.374059	0.21426	0.439627	0.231817	[W (N)] and [B/AA (N)]
let-7a-5p__let-7a-1__-1__0__23M	hsa-let-7a-1	MI0000060	hsa-let-7a-5p	MIMAT0000062	-1	0	94175961	94175983	chr9	+	0	ATGAGGTAGTAGGTTGTATAGTT	ATGAGGTAGTAGGTTGTATAGTT	not reported	not reported	not reported	1	1	1	1	TGAGGTA	5p	3.19053	2.21068	3.31702	2.26776	0.56718	0.416517	0.598531	0.406843	[W (N)] and [W (T)] and [B/AA (N)] and [B/AA (T)]
let-7a-5p__let-7a-1__+1__-1__20M	hsa-let-7a-1	MI0000060	hsa-let-7a-5p	MIMAT0000062	1	-1	94175963	94175982	chr9	+	0	GAGGTAGTAGGTTGTATAGT	GAGGTAGTAGGTTGTATAGT	not reported	not reported	not reported	1	0	1	1	AGGTAGT	5p	3.63179	2.27387	4.13388	1.77113	0.632032	0.271587	0.64296	0.422608	[W (N)] and [W (T)] and [B/AA (N)]
let-7a-5p__let-7a-1__+1__-2__19M	hsa-let-7a-1	MI0000060	hsa-let-7a-5p	MIMAT0000062	1	-2	94175963	94175981	chr9	+	0	GAGGTAGTAGGTTGTATAG	GAGGTAGTAGGTTGTATAG	not reported	not reported	not reported	1	0	1	0	AGGTAGT	5p	2.33955	1.87815	2.48357	1.69852	0.440702	0.253852	0.460588	0.29631	[W (N)] and [B/AA (N)]
let-7a-5p__let-7a-1__+1__0__21M	hsa-let-7a-1	MI0000060	hsa-let-7a-5p	MIMAT0000062	1	0	94175963	94175983	chr9	+	0	GAGGTAGTAGGTTGTATAGTT	GAGGTAGTAGGTTGTATAGTT	not reported	not reported	not reported	1	1	1	1	AGGTAGT	5p	6.73828	4.85921	7.77329	4.42412	0.757076	0.666786	0.767646	0.696345	[W (N)] and [W (T)] and [B/AA (N)] and [B/AA (T)]
let-7a-5p__let-7a-1__+3__-1__18M	hsa-let-7a-1	MI0000060	hsa-let-7a-5p	MIMAT0000062	3	-1	94175965	94175982	chr9	+	0	GGTAGTAGGTTGTATAGT	GGTAGTAGGTTGTATAGT	not reported	not reported	not reported	1	1	1	1	GTAGTAG	5p	9.82008	4.97431	5.91888	3.55007	0.709961	0.610534	0.81924	0.699212	[W (N)] and [W (T)] and [B/AA (N)] and [B/AA (T)]
let-7a-5p__let-7a-1__+3__-1__T1MAG14M	hsa-let-7a-1	MI0000060	hsa-let-7a-5p	MIMAT0000062	3	-1	94175965	94175982	chr9	+	3	TGAGGTAGGTTGTATAGT	GGTAGTAGGTTGTATAGT	TCGA=1:G-T;TCGA=4:A-G	3:T-A	not reported	1	0	1	0	GAGGTAG	5p	5.89206	1.83501	6.8572	1.5982	0.73952	0.228234	0.747044	0.285382	[W (N)] and [B/AA (N)]
let-7a-5p__let-7a-1__+3__-2__T1MAG13M	hsa-let-7a-1	MI0000060	hsa-let-7a-5p	MIMAT0000062	3	-2	94175965	94175981	chr9	+	3	TGAGGTAGGTTGTATAG	GGTAGTAGGTTGTATAG	TCGA=1:G-T;TCGA=4:A-G	3:T-A	not reported	1	0	1	0	GAGGTAG	5p	2.31901	1.31045	2.49315	1.22813	0.442673	0.114654	0.456109	0.132211	[W (N)] and [B/AA (N)]
let-7a-5p__let-7a-1__+3__0__19M	hsa-let-7a-1	MI0000060	hsa-let-7a-5p	MIMAT0000062	3	0	94175965	94175983	chr9	+	0	GGTAGTAGGTTGTATAGTT	GGTAGTAGGTTGTATAGTT	not reported	not reported	not reported	1	1	1	1	GTAGTAG	5p	12.5981	10.4651	7.36063	7.82754	0.749552	0.767646	0.846829	0.810104	[W (N)] and [W (T)] and [B/AA (N)] and [B/AA (T)]
let-7a-5p__let-7a-1__+3__0__T1MAG15M	hsa-let-7a-1	MI0000060	hsa-let-7a-5p	MIMAT0000062	3	0	94175965	94175983	chr9	+	3	TGAGGTAGGTTGTATAGTT	GGTAGTAGGTTGTATAGTT	TCGA=1:G-T;TCGA=4:A-G	3:T-A	not reported	1	1	1	1	GAGGTAG	5p	6.90777	2.64358	8.77929	2.37732	0.771946	0.446435	0.77105	0.50627	[W (N)] and [W (T)] and [B/AA (N)] and [B/AA (T)]
let-7a-5p__let-7a-1__+4__-1__17M	hsa-let-7a-1	MI0000060	hsa-let-7a-5p	MIMAT0000062	4	-1	94175966	94175982	chr9	+	0	GTAGTAGGTTGTATAGT	GTAGTAGGTTGTATAGT	not reported	not reported	not reported	1	0	1	0	TAGTAGG	5p	3.17907	1.89391	2.80886	1.68655	0.502866	0.250448	0.597277	0.302042	[W (N)] and [B/AA (N)]
let-7a-5p__let-7a-1__+4__0__18M	hsa-let-7a-1	MI0000060	hsa-let-7a-5p	MIMAT0000062	4	0	94175966	94175983	chr9	+	0	GTAGTAGGTTGTATAGTT	GTAGTAGGTTGTATAGTT	not reported	not reported	not reported	1	1	1	1	TAGTAGG	5p	5.4184	4.2354	4.36819	3.4718	0.646184	0.604801	0.731996	0.660874	[W (N)] and [W (T)] and [B/AA (N)] and [B/AA (T)]
let-7a-5p__let-7a-1__+5__0__17M	hsa-let-7a-1	MI0000060	hsa-let-7a-5p	MIMAT0000062	5	0	94175967	94175983	chr9	+	0	TAGTAGGTTGTATAGTT	TAGTAGGTTGTATAGTT	not reported	not reported	not reported	0	0	1	0	AGTAGGT	5p	2.13501	1.57712	1.5953	1.40588	0.214798	0.181118	0.405231	0.219455	[W (N)]
let-7a-5p__let-7a-1__0__-1__10MC10M	hsa-let-7a-1	MI0000060	hsa-let-7a-5p	MIMAT0000062	0	-1	94175962	94175982	chr9	+	1	TGAGGTAGTACGTTGTATAGT	TGAGGTAGTAGGTTGTATAGT	not reported	11:G-C	not reported	1	0	0	0	GAGGTAG	5p	1.85488	1.3302	2.62265	1.32566	0.470978	0.153708	0.301684	0.14081	[B/AA (N)]
let-7a-5p__let-7a-1__0__-1__10MT10M	hsa-let-7a-1	MI0000060	hsa-let-7a-5p	MIMAT0000062	0	-1	94175962	94175982	chr9	+	1	TGAGGTAGTATGTTGTATAGT	TGAGGTAGTAGGTTGTATAGT	not reported	11:G-T	not reported	1	0	1	0	GAGGTAG	5p	3.03764	1.42686	3.29235	1.44182	0.563956	0.193479	0.580437	0.172161	[W (N)] and [B/AA (N)]
let-7a-5p__let-7a-1__0__-1__12MC8M	hsa-let-7a-1	MI0000060	hsa-let-7a-5p	MIMAT0000062	0	-1	94175962	94175982	chr9	+	1	TGAGGTAGTAGGCTGTATAGT	TGAGGTAGTAGGTTGTATAGT	not reported	13:T-C	not reported	1	0	1	1	GAGGTAG	5p	3.45068	2.00391	4.61946	1.77232	0.660337	0.271766	0.626478	0.333751	[W (N)] and [W (T)] and [B/AA (N)]
let-7a-5p__let-7a-1__0__-1__12MG8M	hsa-let-7a-1	MI0000060	hsa-let-7a-5p	MIMAT0000062	0	-1	94175962	94175982	chr9	+	1	TGAGGTAGTAGGGTGTATAGT	TGAGGTAGTAGGTTGTATAGT	not reported	13:T-G	not reported	1	0	1	0	GAGGTAG	5p	3.40074	1.40721	4.92918	1.36155	0.675743	0.166607	0.621104	0.166607	[W (N)] and [B/AA (N)]
let-7a-5p__let-7a-1__0__-1__13MC7M	hsa-let-7a-1	MI0000060	hsa-let-7a-5p	MIMAT0000062	0	-1	94175962	94175982	chr9	+	1	TGAGGTAGTAGGTCGTATAGT	TGAGGTAGTAGGTTGTATAGT	not reported	14:T-C	not reported	1	0	1	0	GAGGTAG	5p	2.93292	1.66467	3.5772	1.65874	0.595485	0.242386	0.568255	0.242386	[W (N)] and [B/AA (N)]
let-7a-5p__let-7a-1__0__-1__14MA6M	hsa-let-7a-1	MI0000060	hsa-let-7a-5p	MIMAT0000062	0	-1	94175962	94175982	chr9	+	1	TGAGGTAGTAGGTTATATAGT	TGAGGTAGTAGGTTGTATAGT	TCGA=15:G-A	not reported	not reported	1	0	1	0	GAGGTAG	5p	2.29304	1.5037	2.01736	1.31098	0.300788	0.148155	0.450555	0.197062	[W (N)] and [B/AA (N)]
let-7a-5p__let-7a-1__0__-1__14MC6M	hsa-let-7a-1	MI0000060	hsa-let-7a-5p	MIMAT0000062	0	-1	94175962	94175982	chr9	+	1	TGAGGTAGTAGGTTCTATAGT	TGAGGTAGTAGGTTGTATAGT	not reported	15:G-C	not reported	1	0	1	0	GAGGTAG	5p	2.76944	1.51408	2.85671	1.43201	0.509674	0.189896	0.544787	0.201182	[W (N)] and [B/AA (N)]
let-7a-5p__let-7a-1__0__-1__14MT6M	hsa-let-7a-1	MI0000060	hsa-let-7a-5p	MIMAT0000062	0	-1	94175962	94175982	chr9	+	1	TGAGGTAGTAGGTTTTATAGT	TGAGGTAGTAGGTTGTATAGT	not reported	15:G-T	not reported	1	0	1	0	GAGGTAG	5p	2.83616	1.47813	3.06723	1.43738	0.539233	0.191688	0.552848	0.188821	[W (N)] and [B/AA (N)]
let-7a-5p__let-7a-1__0__-1__15MG5M	hsa-let-7a-1	MI0000060	hsa-let-7a-5p	MIMAT0000062	0	-1	94175962	94175982	chr9	+	1	TGAGGTAGTAGGTTGGATAGT	TGAGGTAGTAGGTTGTATAGT	not reported	16:T-G	not reported	1	0	1	0	GAGGTAG	5p	2.53304	1.36749	2.94788	1.32131	0.523468	0.152454	0.505016	0.152992	[W (N)] and [B/AA (N)]
let-7a-5p__let-7a-1__0__-1__16MC4M	hsa-let-7a-1	MI0000060	hsa-let-7a-5p	MIMAT0000062	0	-1	94175962	94175982	chr9	+	1	TGAGGTAGTAGGTTGTCTAGT	TGAGGTAGTAGGTTGTATAGT	not reported	17:A-C	not reported	1	1	0	1	GAGGTAG	5p	1.58434	2.15018	2.03396	2.37565	0.307417	0.446256	0.211752	0.38857	[W (T)] and [B/AA (N)] and [B/AA (T)]
let-7a-5p__let-7a-1__0__-1__16MG4M	hsa-let-7a-1	MI0000060	hsa-let-7a-5p	MIMAT0000062	0	-1	94175962	94175982	chr9	+	1	TGAGGTAGTAGGTTGTGTAGT	TGAGGTAGTAGGTTGTATAGT	not reported	17:A-G	not reported	1	1	1	1	GAGGTAG	5p	8.89086	2.91601	9.03308	2.75308	0.775528	0.520423	0.805984	0.552311	[W (N)] and [W (T)] and [B/AA (N)] and [B/AA (T)]
let-7a-5p__let-7a-1__0__-1__16MT4M	hsa-let-7a-1	MI0000060	hsa-let-7a-5p	MIMAT0000062	0	-1	94175962	94175982	chr9	+	1	TGAGGTAGTAGGTTGTTTAGT	TGAGGTAGTAGGTTGTATAGT	not reported	17:A-T	not reported	1	0	1	0	GAGGTAG	5p	3.25177	1.56276	3.55919	1.44904	0.593515	0.195271	0.606055	0.214977	[W (N)] and [B/AA (N)]
let-7a-5p__let-7a-1__0__-1__17MA3M	hsa-let-7a-1	MI0000060	hsa-let-7a-5p	MIMAT0000062	0	-1	94175962	94175982	chr9	+	1	TGAGGTAGTAGGTTGTAAAGT	TGAGGTAGTAGGTTGTATAGT	not reported	18:T-A	not reported	1	0	1	0	GAGGTAG	5p	2.17831	1.31134	2.36755	1.30174	0.412039	0.143497	0.4201	0.132748	[W (N)] and [B/AA (N)]
let-7a-5p__let-7a-1__0__-1__17MC3M	hsa-let-7a-1	MI0000060	hsa-let-7a-5p	MIMAT0000062	0	-1	94175962	94175982	chr9	+	1	TGAGGTAGTAGGTTGTACAGT	TGAGGTAGTAGGTTGTATAGT	not reported	18:T-C	not reported	1	0	1	0	GAGGTAG	5p	3.55791	1.83474	3.36233	1.78025	0.572196	0.273737	0.636689	0.284844	[W (N)] and [B/AA (N)]
let-7a-5p__let-7a-1__0__-1__17MG3M	hsa-let-7a-1	MI0000060	hsa-let-7a-5p	MIMAT0000062	0	-1	94175962	94175982	chr9	+	1	TGAGGTAGTAGGTTGTAGAGT	TGAGGTAGTAGGTTGTATAGT	not reported	18:T-G	not reported	1	0	1	0	GAGGTAG	5p	2.16501	1.2189	2.35424	1.20604	0.408814	0.104085	0.415442	0.093694	[W (N)] and [B/AA (N)]
let-7a-5p__let-7a-1__0__-1__18MT2M	hsa-let-7a-1	MI0000060	hsa-let-7a-5p	MIMAT0000062	0	-1	94175962	94175982	chr9	+	1	TGAGGTAGTAGGTTGTATTGT	TGAGGTAGTAGGTTGTATAGT	not reported	19:A-T	not reported	1	0	1	0	GAGGTAG	5p	3.06971	1.70824	3.82795	1.69151	0.614475	0.251164	0.583303	0.253852	[W (N)] and [B/AA (N)]
let-7a-5p__let-7a-1__0__-1__1MA19M	hsa-let-7a-1	MI0000060	hsa-let-7a-5p	MIMAT0000062	0	-1	94175962	94175982	chr9	+	1	TAAGGTAGTAGGTTGTATAGT	TGAGGTAGTAGGTTGTATAGT	not reported	2:G-A	not reported	1	0	1	0	AAGGTAG	5p	2.36789	1.81195	3.0431	1.64183	0.536546	0.237012	0.467753	0.280186	[W (N)] and [B/AA (N)]
let-7a-5p__let-7a-1__0__-1__1MC19M	hsa-let-7a-1	MI0000060	hsa-let-7a-5p	MIMAT0000062	0	-1	94175962	94175982	chr9	+	1	TCAGGTAGTAGGTTGTATAGT	TGAGGTAGTAGGTTGTATAGT	not reported	2:G-C	not reported	1	0	1	0	CAGGTAG	5p	4.21879	1.73924	5.33604	1.52653	0.690075	0.213006	0.683088	0.261018	[W (N)] and [B/AA (N)]
let-7a-5p__let-7a-1__0__-1__1MT19M	hsa-let-7a-1	MI0000060	hsa-let-7a-5p	MIMAT0000062	0	-1	94175962	94175982	chr9	+	1	TTAGGTAGTAGGTTGTATAGT	TGAGGTAGTAGGTTGTATAGT	TCGA=2:G-T	not reported	not reported	1	1	1	1	TAGGTAG	5p	12.7072	6.50818	15.4114	5.66014	0.834289	0.717664	0.847546	0.748298	[W (N)] and [W (T)] and [B/AA (N)] and [B/AA (T)]
let-7a-5p__let-7a-1__0__-1__1MT1MT17M	hsa-let-7a-1	MI0000060	hsa-let-7a-5p	MIMAT0000062	0	-1	94175962	94175982	chr9	+	2	TTATGTAGTAGGTTGTATAGT	TGAGGTAGTAGGTTGTATAGT	TCGA=2:G-T;TCGA=4:G-T	not reported	not reported	0	1	0	1	TATGTAG	5p	1.13361	2.40354	1	2.05219	0.000179147	0.341992	0.0811537	0.459154	[W (T)] and [B/AA (T)]
let-7a-5p__let-7a-1__0__-1__1MTC18M	hsa-let-7a-1	MI0000060	hsa-let-7a-5p	MIMAT0000062	0	-1	94175962	94175982	chr9	+	2	TTCGGTAGTAGGTTGTATAGT	TGAGGTAGTAGGTTGTATAGT	TCGA=2:G-T	3:A-C	not reported	0	1	0	1	TCGGTAG	5p	1.02304	2.74575	1	2.33109	0.000179147	0.43479	0.0385167	0.525797	[W (T)] and [B/AA (T)]
let-7a-5p__let-7a-1__0__-1__21M	hsa-let-7a-1	MI0000060	hsa-let-7a-5p	MIMAT0000062	0	-1	94175962	94175982	chr9	+	0	TGAGGTAGTAGGTTGTATAGT	TGAGGTAGTAGGTTGTATAGT	not reported	not reported	not reported	1	1	1	1	GAGGTAG	5p	23249.6	6597.09	27327.3	6283.15	0.999104	0.996775	0.999104	0.996775	[W (N)] and [W (T)] and [B/AA (N)] and [B/AA (T)]
let-7a-5p__let-7a-1__0__-1__2MC18M	hsa-let-7a-1	MI0000060	hsa-let-7a-5p	MIMAT0000062	0	-1	94175962	94175982	chr9	+	1	TGCGGTAGTAGGTTGTATAGT	TGAGGTAGTAGGTTGTATAGT	not reported	3:A-C	not reported	0	1	0	1	GCGGTAG	5p	1.39835	10.7849	1.15018	16.8908	0.106772	0.850412	0.156575	0.813508	[W (T)] and [B/AA (T)]
let-7a-5p__let-7a-1__0__-1__2MCT17M	hsa-let-7a-1	MI0000060	hsa-let-7a-5p	MIMAT0000062	0	-1	94175962	94175982	chr9	+	2	TGCTGTAGTAGGTTGTATAGT	TGAGGTAGTAGGTTGTATAGT	TCGA=4:G-T	3:A-C	not reported	0	1	0	1	GCTGTAG	5p	1.02304	7.28679	1.03577	11.9763	0.063239	0.81727	0.0385167	0.761913	[W (T)] and [B/AA (T)]
let-7a-5p__let-7a-1__0__-1__2MG18M	hsa-let-7a-1	MI0000060	hsa-let-7a-5p	MIMAT0000062	0	-1	94175962	94175982	chr9	+	1	TGGGGTAGTAGGTTGTATAGT	TGAGGTAGTAGGTTGTATAGT	TCGA=3:A-G	not reported	not reported	1	1	1	1	GGGGTAG	5p	7.36111	2.16434	9.41713	2.15187	0.783232	0.376568	0.780903	0.39287	[W (N)] and [W (T)] and [B/AA (N)] and [B/AA (T)]
let-7a-5p__let-7a-1__0__-1__2MT18M	hsa-let-7a-1	MI0000060	hsa-let-7a-5p	MIMAT0000062	0	-1	94175962	94175982	chr9	+	1	TGTGGTAGTAGGTTGTATAGT	TGAGGTAGTAGGTTGTATAGT	not reported	3:A-T	not reported	1	1	1	1	GTGGTAG	5p	15.2055	2.43151	33.2704	2.00125	0.894124	0.324436	0.861519	0.467753	[W (N)] and [W (T)] and [B/AA (N)] and [B/AA (T)]
let-7a-5p__let-7a-1__0__-1__3MA17M	hsa-let-7a-1	MI0000060	hsa-let-7a-5p	MIMAT0000062	0	-1	94175962	94175982	chr9	+	1	TGAAGTAGTAGGTTGTATAGT	TGAGGTAGTAGGTTGTATAGT	not reported	4:G-A	not reported	1	0	1	0	GAAGTAG	5p	2.968	1.44998	2.83942	1.33873	0.505912	0.157829	0.572555	0.177714	[W (N)] and [B/AA (N)]
let-7a-5p__let-7a-1__0__-1__3MC17M	hsa-let-7a-1	MI0000060	hsa-let-7a-5p	MIMAT0000062	0	-1	94175962	94175982	chr9	+	1	TGACGTAGTAGGTTGTATAGT	TGAGGTAGTAGGTTGTATAGT	not reported	4:G-C	not reported	1	0	1	0	GACGTAG	5p	2.84235	1.36589	2.53557	1.3239	0.453601	0.152992	0.55464	0.152275	[W (N)] and [B/AA (N)]
let-7a-5p__let-7a-1__0__-1__3MT17M	hsa-let-7a-1	MI0000060	hsa-let-7a-5p	MIMAT0000062	0	-1	94175962	94175982	chr9	+	1	TGATGTAGTAGGTTGTATAGT	TGAGGTAGTAGGTTGTATAGT	TCGA=4:G-T	not reported	not reported	1	1	1	1	GATGTAG	5p	7.84511	19.5642	4.51198	15.6941	0.65335	0.844858	0.790756	0.863131	[W (N)] and [W (T)] and [B/AA (N)] and [B/AA (T)]
let-7a-5p__let-7a-1__0__-1__4MA16M	hsa-let-7a-1	MI0000060	hsa-let-7a-5p	MIMAT0000062	0	-1	94175962	94175982	chr9	+	1	TGAGATAGTAGGTTGTATAGT	TGAGGTAGTAGGTTGTATAGT	COSV100762380,TCGA=5:G-A	not reported	not reported	0	1	0	0	GAGATAG	5p	1.79877	1.3845	1.70609	2.52995	0.23522	0.479936	0.283053	0.159799	[B/AA (T)]
let-7a-5p__let-7a-1__0__-1__4MT16M	hsa-let-7a-1	MI0000060	hsa-let-7a-5p	MIMAT0000062	0	-1	94175962	94175982	chr9	+	1	TGAGTTAGTAGGTTGTATAGT	TGAGGTAGTAGGTTGTATAGT	not reported	5:G-T	not reported	1	1	1	0	GAGTTAG	5p	2.62944	1.59897	2.78492	2.39989	0.498209	0.451272	0.520423	0.22483	[W (N)] and [B/AA (N)] and [B/AA (T)]
let-7a-5p__let-7a-1__0__-1__5MA15M	hsa-let-7a-1	MI0000060	hsa-let-7a-5p	MIMAT0000062	0	-1	94175962	94175982	chr9	+	1	TGAGGAAGTAGGTTGTATAGT	TGAGGTAGTAGGTTGTATAGT	not reported	6:T-A	not reported	1	0	0	0	GAGGAAG	5p	1.63733	1.22229	2.23506	1.22614	0.379613	0.113579	0.230563	0.0944106	[B/AA (N)]
let-7a-5p__let-7a-1__0__-1__5MC15M	hsa-let-7a-1	MI0000060	hsa-let-7a-5p	MIMAT0000062	0	-1	94175962	94175982	chr9	+	1	TGAGGCAGTAGGTTGTATAGT	TGAGGTAGTAGGTTGTATAGT	not reported	6:T-C	not reported	1	0	1	1	GAGGCAG	5p	4.03872	2.04569	5.65516	1.88637	0.702436	0.298997	0.670727	0.352562	[W (N)] and [W (T)] and [B/AA (N)]
let-7a-5p__let-7a-1__0__-1__5MG15M	hsa-let-7a-1	MI0000060	hsa-let-7a-5p	MIMAT0000062	0	-1	94175962	94175982	chr9	+	1	TGAGGGAGTAGGTTGTATAGT	TGAGGTAGTAGGTTGTATAGT	not reported	6:T-G	not reported	1	1	1	1	GAGGGAG	5p	8.06309	2.32574	11.9737	2.36162	0.809387	0.441598	0.793264	0.437657	[W (N)] and [W (T)] and [B/AA (N)] and [B/AA (T)]
let-7a-5p__let-7a-1__0__-1__6MC14M	hsa-let-7a-1	MI0000060	hsa-let-7a-5p	MIMAT0000062	0	-1	94175962	94175982	chr9	+	1	TGAGGTCGTAGGTTGTATAGT	TGAGGTAGTAGGTTGTATAGT	TCGA=7:A-C	not reported	not reported	1	0	1	0	GAGGTCG	5p	8.3755	1.24866	3.76389	1.13269	0.610713	0.0650305	0.799355	0.105876	[W (N)] and [B/AA (N)]
let-7a-5p__let-7a-1__0__-1__6MC2MC11M	hsa-let-7a-1	MI0000060	hsa-let-7a-5p	MIMAT0000062	0	-1	94175962	94175982	chr9	+	2	TGAGGTCGTCGGTTGTATAGT	TGAGGTAGTAGGTTGTATAGT	TCGA=7:A-C	10:A-C	not reported	0	0	1	0	GAGGTCG	5p	2.88472	1.01832	1.38384	1	0.163741	0.000179147	0.561268	0.00412039	[W (N)]
let-7a-5p__let-7a-1__0__-1__6MG14M	hsa-let-7a-1	MI0000060	hsa-let-7a-5p	MIMAT0000062	0	-1	94175962	94175982	chr9	+	1	TGAGGTGGTAGGTTGTATAGT	TGAGGTAGTAGGTTGTATAGT	TCGA=7:A-G	not reported	not reported	1	1	1	1	GAGGTGG	5p	10.2595	2.95641	13.6111	2.85868	0.822286	0.535829	0.82354	0.556073	[W (N)] and [W (T)] and [B/AA (N)] and [B/AA (T)]
let-7a-5p__let-7a-1__0__-1__6MT14M	hsa-let-7a-1	MI0000060	hsa-let-7a-5p	MIMAT0000062	0	-1	94175962	94175982	chr9	+	1	TGAGGTTGTAGGTTGTATAGT	TGAGGTAGTAGGTTGTATAGT	not reported	7:A-T	not reported	1	0	1	0	GAGGTTG	5p	3.31244	1.43648	3.67676	1.42538	0.60301	0.188642	0.612146	0.17431	[W (N)] and [B/AA (N)]
let-7a-5p__let-7a-1__0__-1__7MA13M	hsa-let-7a-1	MI0000060	hsa-let-7a-5p	MIMAT0000062	0	-1	94175962	94175982	chr9	+	1	TGAGGTAATAGGTTGTATAGT	TGAGGTAGTAGGTTGTATAGT	not reported	8:G-A	not reported	1	0	0	0	GAGGTAA	5p	1.63931	1.31105	2.16582	1.29217	0.35919	0.140093	0.231817	0.132569	[B/AA (N)]
let-7a-5p__let-7a-1__0__-1__7MC13M	hsa-let-7a-1	MI0000060	hsa-let-7a-5p	MIMAT0000062	0	-1	94175962	94175982	chr9	+	1	TGAGGTACTAGGTTGTATAGT	TGAGGTAGTAGGTTGTATAGT	not reported	8:G-C	not reported	1	0	1	0	GAGGTAC	5p	2.97438	1.57804	4.12792	1.49666	0.631852	0.206019	0.57363	0.219814	[W (N)] and [B/AA (N)]
let-7a-5p__let-7a-1__0__-1__7MT13M	hsa-let-7a-1	MI0000060	hsa-let-7a-5p	MIMAT0000062	0	-1	94175962	94175982	chr9	+	1	TGAGGTATTAGGTTGTATAGT	TGAGGTAGTAGGTTGTATAGT	not reported	8:G-T	not reported	1	0	1	0	GAGGTAT	5p	2.54533	1.54403	3.74444	1.39753	0.608205	0.17861	0.506628	0.208886	[W (N)] and [B/AA (N)]
let-7a-5p__let-7a-1__0__-1__8MC12M	hsa-let-7a-1	MI0000060	hsa-let-7a-5p	MIMAT0000062	0	-1	94175962	94175982	chr9	+	1	TGAGGTAGCAGGTTGTATAGT	TGAGGTAGTAGGTTGTATAGT	not reported	9:T-C	not reported	1	0	1	0	GAGGTAG	5p	3.32903	1.72504	4.04254	1.66343	0.625224	0.24364	0.614833	0.259047	[W (N)] and [B/AA (N)]
let-7a-5p__let-7a-1__0__-1__9MC11M	hsa-let-7a-1	MI0000060	hsa-let-7a-5p	MIMAT0000062	0	-1	94175962	94175982	chr9	+	1	TGAGGTAGTCGGTTGTATAGT	TGAGGTAGTAGGTTGTATAGT	not reported	10:A-C	not reported	1	0	1	0	GAGGTAG	5p	4.47118	1.21539	2.00107	1.14687	0.293622	0.0716589	0.695987	0.0927983	[W (N)] and [B/AA (N)]
let-7a-5p__let-7a-1__0__-1__9MG11M	hsa-let-7a-1	MI0000060	hsa-let-7a-5p	MIMAT0000062	0	-1	94175962	94175982	chr9	+	1	TGAGGTAGTGGGTTGTATAGT	TGAGGTAGTAGGTTGTATAGT	not reported	not reported	29233923=10:A-G	1	0	1	1	GAGGTAG	5p	4.40271	2.10787	5.16804	1.92251	0.684163	0.308312	0.693121	0.372985	[W (N)] and [W (T)] and [B/AA (N)]
let-7a-5p__let-7a-1__0__-1__9MT11M	hsa-let-7a-1	MI0000060	hsa-let-7a-5p	MIMAT0000062	0	-1	94175962	94175982	chr9	+	1	TGAGGTAGTTGGTTGTATAGT	TGAGGTAGTAGGTTGTATAGT	not reported	10:A-T	not reported	1	0	1	0	GAGGTAG	5p	2.66821	1.48612	3.01012	1.47685	0.531351	0.201362	0.529201	0.191867	[W (N)] and [B/AA (N)]
let-7a-5p__let-7a-1__0__-1__A20M	hsa-let-7a-1	MI0000060	hsa-let-7a-5p	MIMAT0000062	0	-1	94175962	94175982	chr9	+	1	AGAGGTAGTAGGTTGTATAGT	TGAGGTAGTAGGTTGTATAGT	rs201607747=1:T-A	not reported	not reported	1	0	1	0	GAGGTAG	5p	2.23489	1.57569	2.50349	1.51547	0.444464	0.210319	0.435865	0.218918	[W (N)] and [B/AA (N)]
let-7a-5p__let-7a-1__0__-2__12MC7M	hsa-let-7a-1	MI0000060	hsa-let-7a-5p	MIMAT0000062	0	-2	94175962	94175981	chr9	+	1	TGAGGTAGTAGGCTGTATAG	TGAGGTAGTAGGTTGTATAG	not reported	13:T-C	not reported	1	0	1	0	GAGGTAG	5p	2.00734	1.55402	2.30848	1.43656	0.39914	0.19115	0.355249	0.21229	[W (N)] and [B/AA (N)]
let-7a-5p__let-7a-1__0__-2__12MG7M	hsa-let-7a-1	MI0000060	hsa-let-7a-5p	MIMAT0000062	0	-2	94175962	94175981	chr9	+	1	TGAGGTAGTAGGGTGTATAG	TGAGGTAGTAGGTTGTATAG	not reported	13:T-G	not reported	1	0	1	0	GAGGTAG	5p	2.2811	1.3172	3.49287	1.23762	0.586528	0.117341	0.447868	0.134719	[W (N)] and [B/AA (N)]
let-7a-5p__let-7a-1__0__-2__14MC5M	hsa-let-7a-1	MI0000060	hsa-let-7a-5p	MIMAT0000062	0	-2	94175962	94175981	chr9	+	1	TGAGGTAGTAGGTTCTATAG	TGAGGTAGTAGGTTGTATAG	not reported	15:G-C	not reported	1	0	1	0	GAGGTAG	5p	2.42225	1.54973	2.36818	1.48829	0.412397	0.205124	0.482444	0.211215	[W (N)] and [B/AA (N)]
let-7a-5p__let-7a-1__0__-2__15MG4M	hsa-let-7a-1	MI0000060	hsa-let-7a-5p	MIMAT0000062	0	-2	94175962	94175981	chr9	+	1	TGAGGTAGTAGGTTGGATAG	TGAGGTAGTAGGTTGTATAG	not reported	16:T-G	not reported	0	0	1	0	GAGGTAG	5p	2.04537	1.26591	1.95843	1.20187	0.284665	0.101397	0.368148	0.112863	[W (N)]
let-7a-5p__let-7a-1__0__-2__17MC2M	hsa-let-7a-1	MI0000060	hsa-let-7a-5p	MIMAT0000062	0	-2	94175962	94175981	chr9	+	1	TGAGGTAGTAGGTTGTACAG	TGAGGTAGTAGGTTGTATAG	not reported	18:T-C	not reported	1	0	0	0	GAGGTAG	5p	1.93248	1.43048	2.33239	1.44267	0.404156	0.193837	0.329989	0.173235	[B/AA (N)]
let-7a-5p__let-7a-1__0__-2__1MC18M	hsa-let-7a-1	MI0000060	hsa-let-7a-5p	MIMAT0000062	0	-2	94175962	94175981	chr9	+	1	TCAGGTAGTAGGTTGTATAG	TGAGGTAGTAGGTTGTATAG	not reported	2:G-C	not reported	1	0	1	0	CAGGTAG	5p	2.51942	1.49132	3.73537	1.37657	0.607488	0.170906	0.501612	0.193121	[W (N)] and [B/AA (N)]
let-7a-5p__let-7a-1__0__-2__1MTC17M	hsa-let-7a-1	MI0000060	hsa-let-7a-5p	MIMAT0000062	0	-2	94175962	94175981	chr9	+	2	TTCGGTAGTAGGTTGTATAG	TGAGGTAGTAGGTTGTATAG	TCGA=2:G-T	3:A-C	not reported	0	1	0	1	TCGGTAG	5p	1	2.22037	1	2.10386	0.000179147	0.361519	0.000179147	0.409351	[W (T)] and [B/AA (T)]
let-7a-5p__let-7a-1__0__-2__20M	hsa-let-7a-1	MI0000060	hsa-let-7a-5p	MIMAT0000062	0	-2	94175962	94175981	chr9	+	0	TGAGGTAGTAGGTTGTATAG	TGAGGTAGTAGGTTGTATAG	not reported	not reported	not reported	1	1	1	1	GAGGTAG	5p	11156.7	4151.56	11700.6	4083.72	0.997492	0.995521	0.998388	0.995521	[W (N)] and [W (T)] and [B/AA (N)] and [B/AA (T)]
let-7a-5p__let-7a-1__0__-2__2MC17M	hsa-let-7a-1	MI0000060	hsa-let-7a-5p	MIMAT0000062	0	-2	94175962	94175981	chr9	+	1	TGCGGTAGTAGGTTGTATAG	TGAGGTAGTAGGTTGTATAG	not reported	3:A-C	not reported	0	1	0	1	GCGGTAG	5p	1.12419	7.89077	1.13915	11.883	0.102114	0.816553	0.0784665	0.7732	[W (T)] and [B/AA (T)]
let-7a-5p__let-7a-1__0__-2__2MCT16M	hsa-let-7a-1	MI0000060	hsa-let-7a-5p	MIMAT0000062	0	-2	94175962	94175981	chr9	+	2	TGCTGTAGTAGGTTGTATAG	TGAGGTAGTAGGTTGTATAG	TCGA=4:G-T	3:A-C	not reported	0	1	0	1	GCTGTAG	5p	1.04943	5.48513	1	8.77814	0.000179147	0.782515	0.053565	0.718918	[W (T)] and [B/AA (T)]
let-7a-5p__let-7a-1__0__-2__2MT17M	hsa-let-7a-1	MI0000060	hsa-let-7a-5p	MIMAT0000062	0	-2	94175962	94175981	chr9	+	1	TGTGGTAGTAGGTTGTATAG	TGAGGTAGTAGGTTGTATAG	not reported	3:A-T	not reported	1	0	1	1	GTGGTAG	5p	8.50823	2.08073	19.1327	1.69822	0.852562	0.253493	0.801863	0.364027	[W (N)] and [W (T)] and [B/AA (N)]
let-7a-5p__let-7a-1__0__-2__3MT16M	hsa-let-7a-1	MI0000060	hsa-let-7a-5p	MIMAT0000062	0	-2	94175962	94175981	chr9	+	1	TGATGTAGTAGGTTGTATAG	TGAGGTAGTAGGTTGTATAG	TCGA=4:G-T	not reported	not reported	1	1	1	1	GATGTAG	5p	4.45546	12.8757	3.14577	10.8106	0.547474	0.806521	0.694912	0.829273	[W (N)] and [W (T)] and [B/AA (N)] and [B/AA (T)]
let-7a-5p__let-7a-1__0__-2__4MA15M	hsa-let-7a-1	MI0000060	hsa-let-7a-5p	MIMAT0000062	0	-2	94175962	94175981	chr9	+	1	TGAGATAGTAGGTTGTATAG	TGAGGTAGTAGGTTGTATAG	COSV100762380,TCGA=5:G-A	not reported	not reported	0	1	0	0	GAGATAG	5p	1.41814	1.26847	1.39539	2.16617	0.167144	0.380867	0.160874	0.113938	[B/AA (T)]
let-7a-5p__let-7a-1__0__-2__4MT15M	hsa-let-7a-1	MI0000060	hsa-let-7a-5p	MIMAT0000062	0	-2	94175962	94175981	chr9	+	1	TGAGTTAGTAGGTTGTATAG	TGAGGTAGTAGGTTGTATAG	not reported	5:G-T	not reported	1	0	0	0	GAGTTAG	5p	1.79607	1.34131	2.34366	1.77368	0.406306	0.272483	0.282157	0.144751	[B/AA (N)]
let-7a-5p__let-7a-1__0__-2__6MC13M	hsa-let-7a-1	MI0000060	hsa-let-7a-5p	MIMAT0000062	0	-2	94175962	94175981	chr9	+	1	TGAGGTCGTAGGTTGTATAG	TGAGGTAGTAGGTTGTATAG	TCGA=7:A-C	not reported	not reported	1	0	1	0	GAGGTCG	5p	5.41712	1.18464	2.45994	1.05554	0.434611	0.0229308	0.731817	0.0782874	[W (N)] and [B/AA (N)]
let-7a-5p__let-7a-1__0__-2__6MG13M	hsa-let-7a-1	MI0000060	hsa-let-7a-5p	MIMAT0000062	0	-2	94175962	94175981	chr9	+	1	TGAGGTGGTAGGTTGTATAG	TGAGGTAGTAGGTTGTATAG	TCGA=7:A-G	not reported	not reported	1	1	1	1	GAGGTGG	5p	6.82831	2.59363	7.79074	2.51662	0.757614	0.477248	0.769079	0.499821	[W (N)] and [W (T)] and [B/AA (N)] and [B/AA (T)]
let-7a-5p__let-7a-1__0__-2__8MC11M	hsa-let-7a-1	MI0000060	hsa-let-7a-5p	MIMAT0000062	0	-2	94175962	94175981	chr9	+	1	TGAGGTAGCAGGTTGTATAG	TGAGGTAGTAGGTTGTATAG	not reported	9:T-C	not reported	1	0	1	0	GAGGTAG	5p	2.04955	1.55414	2.16801	1.47092	0.359907	0.200107	0.36976	0.212469	[W (N)] and [B/AA (N)]
let-7a-5p__let-7a-1__0__-2__9MG10M	hsa-let-7a-1	MI0000060	hsa-let-7a-5p	MIMAT0000062	0	-2	94175962	94175981	chr9	+	1	TGAGGTAGTGGGTTGTATAG	TGAGGTAGTAGGTTGTATAG	not reported	not reported	29233923=10:A-G	1	0	1	0	GAGGTAG	5p	2.60097	1.78258	2.87478	1.63848	0.512719	0.236295	0.51684	0.272841	[W (N)] and [B/AA (N)]
let-7a-5p__let-7a-1__0__-3__12MG6M	hsa-let-7a-1	MI0000060	hsa-let-7a-5p	MIMAT0000062	0	-3	94175962	94175980	chr9	+	1	TGAGGTAGTAGGGTGTATA	TGAGGTAGTAGGTTGTATA	not reported	13:T-G	not reported	1	0	0	0	GAGGTAG	5p	1.28689	1.03803	2.00168	1.06936	0.293802	0.0302759	0.123432	0.00824077	[B/AA (N)]
let-7a-5p__let-7a-1__0__-3__19M	hsa-let-7a-1	MI0000060	hsa-let-7a-5p	MIMAT0000062	0	-3	94175962	94175980	chr9	+	0	TGAGGTAGTAGGTTGTATA	TGAGGTAGTAGGTTGTATA	not reported	not reported	not reported	1	1	1	1	GAGGTAG	5p	839.215	259.919	964	287.488	0.985668	0.969187	0.985668	0.96847	[W (N)] and [W (T)] and [B/AA (N)] and [B/AA (T)]
let-7a-5p__let-7a-1__0__-6__16M	hsa-let-7a-1	MI0000060	hsa-let-7a-5p	MIMAT0000062	0	-6	94175962	94175977	chr9	+	0	TGAGGTAGTAGGTTGT	TGAGGTAGTAGGTTGT	not reported	not reported	not reported	1	1	1	1	GAGGTAG	5p	846.717	274.378	673.333	237.239	0.981906	0.965425	0.986027	0.969366	[W (N)] and [W (T)] and [B/AA (N)] and [B/AA (T)]
let-7a-5p__let-7a-1__0__-6__6MC2MC6M	hsa-let-7a-1	MI0000060	hsa-let-7a-5p	MIMAT0000062	0	-6	94175962	94175977	chr9	+	2	TGAGGTCGTCGGTTGT	TGAGGTAGTAGGTTGT	TCGA=7:A-C	10:A-C	not reported	0	0	1	0	GAGGTCG	5p	2.51702	1.06643	1.16945	1.01623	0.11125	0.00537442	0.500358	0.0161233	[W (N)]
let-7a-5p__let-7a-1__0__+1__22MC	hsa-let-7a-1	MI0000060	hsa-let-7a-5p	MIMAT0000062	0	1	94175962	94175984	chr9	+	1	TGAGGTAGTAGGTTGTATAGTTC	TGAGGTAGTAGGTTGTATAGTTT	rs375806817=23:T-C	not reported	not reported	1	1	1	1	GAGGTAG	5p	3.31967	2.88134	3.53202	2.95501	0.590828	0.551057	0.612684	0.547474	[W (N)] and [W (T)] and [B/AA (N)] and [B/AA (T)]
let-7a-5p__let-7a-1__0__+1__23M	hsa-let-7a-1	MI0000060	hsa-let-7a-5p	MIMAT0000062	0	1	94175962	94175984	chr9	+	0	TGAGGTAGTAGGTTGTATAGTTT	TGAGGTAGTAGGTTGTATAGTTT	not reported	not reported	not reported	1	1	1	1	GAGGTAG	5p	315.523	183.304	368.59	212.802	0.972232	0.962021	0.975636	0.960229	[W (N)] and [W (T)] and [B/AA (N)] and [B/AA (T)]
let-7a-5p__let-7a-1__0__+1__2MC20M	hsa-let-7a-1	MI0000060	hsa-let-7a-5p	MIMAT0000062	0	1	94175962	94175984	chr9	+	1	TGCGGTAGTAGGTTGTATAGTTT	TGAGGTAGTAGGTTGTATAGTTT	not reported	3:A-C	not reported	0	1	0	0	GCGGTAG	5p	1.00419	1.94931	1	2.32464	0.000179147	0.432282	0.0274095	0.318703	[B/AA (T)]
let-7a-5p__let-7a-1__0__+1__2MCT19M	hsa-let-7a-1	MI0000060	hsa-let-7a-5p	MIMAT0000062	0	1	94175962	94175984	chr9	+	2	TGCTGTAGTAGGTTGTATAGTTT	TGAGGTAGTAGGTTGTATAGTTT	TCGA=4:G-T	3:A-C	not reported	0	1	0	0	GCTGTAG	5p	1	1.71137	1	2.02884	0.000179147	0.334289	0.000179147	0.254927	[B/AA (T)]
let-7a-5p__let-7a-1__0__+1__3MT19M	hsa-let-7a-1	MI0000060	hsa-let-7a-5p	MIMAT0000062	0	1	94175962	94175984	chr9	+	1	TGATGTAGTAGGTTGTATAGTTT	TGAGGTAGTAGGTTGTATAGTTT	TCGA=4:G-T	not reported	not reported	0	1	0	1	GATGTAG	5p	1.3751	2.43722	1.05378	2.02627	0.0745253	0.332856	0.149051	0.469187	[W (T)] and [B/AA (T)]
let-7a-5p__let-7a-1__0__+2__21MA1MC	hsa-let-7a-1	MI0000060	hsa-let-7a-5p	MIMAT0000062	0	2	94175962	94175985	chr9	+	2	TGAGGTAGTAGGTTGTATAGTATC	TGAGGTAGTAGGTTGTATAGTTTT	rs1273769102=24:T-C	22:T-A	not reported	1	0	0	0	GAGGTAG	5p	1.9455	1.36672	2.06772	1.42665	0.323898	0.189	0.335005	0.152454	[B/AA (N)]
let-7a-5p__let-7a-1__0__+2__24M	hsa-let-7a-1	MI0000060	hsa-let-7a-5p	MIMAT0000062	0	2	94175962	94175985	chr9	+	0	TGAGGTAGTAGGTTGTATAGTTTT	TGAGGTAGTAGGTTGTATAGTTTT	not reported	not reported	not reported	1	1	1	1	GAGGTAG	5p	3.03757	2.35185	2.86148	2.59398	0.511286	0.492834	0.580079	0.445898	[W (N)] and [W (T)] and [B/AA (N)] and [B/AA (T)]
let-7a-5p__let-7a-1__0__0__10MC11M	hsa-let-7a-1	MI0000060	hsa-let-7a-5p	MIMAT0000062	0	0	94175962	94175983	chr9	+	1	TGAGGTAGTACGTTGTATAGTT	TGAGGTAGTAGGTTGTATAGTT	not reported	11:G-C	not reported	1	0	1	0	GAGGTAG	5p	2.25219	1.45751	2.51778	1.43713	0.44966	0.191508	0.441061	0.18076	[W (N)] and [B/AA (N)]
let-7a-5p__let-7a-1__0__0__10MT11M	hsa-let-7a-1	MI0000060	hsa-let-7a-5p	MIMAT0000062	0	0	94175962	94175983	chr9	+	1	TGAGGTAGTATGTTGTATAGTT	TGAGGTAGTAGGTTGTATAGTT	not reported	11:G-T	not reported	1	0	1	0	GAGGTAG	5p	2.72948	1.63411	3.83677	1.76968	0.614833	0.271408	0.539412	0.23522	[W (N)] and [B/AA (N)]
let-7a-5p__let-7a-1__0__0__12MC9M	hsa-let-7a-1	MI0000060	hsa-let-7a-5p	MIMAT0000062	0	0	94175962	94175983	chr9	+	1	TGAGGTAGTAGGCTGTATAGTT	TGAGGTAGTAGGTTGTATAGTT	not reported	13:T-C	not reported	1	1	1	1	GAGGTAG	5p	3.94063	2.39564	4.07887	2.30342	0.62809	0.426908	0.665353	0.456826	[W (N)] and [W (T)] and [B/AA (N)] and [B/AA (T)]
let-7a-5p__let-7a-1__0__0__12MG9M	hsa-let-7a-1	MI0000060	hsa-let-7a-5p	MIMAT0000062	0	0	94175962	94175983	chr9	+	1	TGAGGTAGTAGGGTGTATAGTT	TGAGGTAGTAGGTTGTATAGTT	not reported	13:T-G	not reported	1	0	1	0	GAGGTAG	5p	3.27861	1.54209	4.19397	1.4188	0.636152	0.186671	0.608563	0.207632	[W (N)] and [B/AA (N)]
let-7a-5p__let-7a-1__0__0__13MC8M	hsa-let-7a-1	MI0000060	hsa-let-7a-5p	MIMAT0000062	0	0	94175962	94175983	chr9	+	1	TGAGGTAGTAGGTCGTATAGTT	TGAGGTAGTAGGTTGTATAGTT	not reported	14:T-C	not reported	1	1	1	1	GAGGTAG	5p	3.646	2.22378	4.68987	2.15627	0.664099	0.377642	0.644034	0.410247	[W (N)] and [W (T)] and [B/AA (N)] and [B/AA (T)]
let-7a-5p__let-7a-1__0__0__14MA7M	hsa-let-7a-1	MI0000060	hsa-let-7a-5p	MIMAT0000062	0	0	94175962	94175983	chr9	+	1	TGAGGTAGTAGGTTATATAGTT	TGAGGTAGTAGGTTGTATAGTT	TCGA=15:G-A	not reported	not reported	1	0	1	0	GAGGTAG	5p	2.39833	1.90289	2.99081	1.70229	0.528484	0.254747	0.474919	0.305088	[W (N)] and [B/AA (N)]
let-7a-5p__let-7a-1__0__0__14MC7M	hsa-let-7a-1	MI0000060	hsa-let-7a-5p	MIMAT0000062	0	0	94175962	94175983	chr9	+	1	TGAGGTAGTAGGTTCTATAGTT	TGAGGTAGTAGGTTGTATAGTT	not reported	15:G-C	not reported	1	0	1	0	GAGGTAG	5p	2.51833	1.72355	3.37518	1.67218	0.574704	0.246507	0.501254	0.258868	[W (N)] and [B/AA (N)]
let-7a-5p__let-7a-1__0__0__14MT7M	hsa-let-7a-1	MI0000060	hsa-let-7a-5p	MIMAT0000062	0	0	94175962	94175983	chr9	+	1	TGAGGTAGTAGGTTTTATAGTT	TGAGGTAGTAGGTTGTATAGTT	not reported	15:G-T	not reported	1	0	1	0	GAGGTAG	5p	3.51807	1.7457	4.11772	1.88727	0.630598	0.299355	0.633286	0.262272	[W (N)] and [B/AA (N)]
let-7a-5p__let-7a-1__0__0__15MG6M	hsa-let-7a-1	MI0000060	hsa-let-7a-5p	MIMAT0000062	0	0	94175962	94175983	chr9	+	1	TGAGGTAGTAGGTTGGATAGTT	TGAGGTAGTAGGTTGTATAGTT	not reported	16:T-G	not reported	1	0	1	0	GAGGTAG	5p	2.60385	1.55414	2.55832	1.41	0.458438	0.182909	0.517377	0.212648	[W (N)] and [B/AA (N)]
let-7a-5p__let-7a-1__0__0__16MC5M	hsa-let-7a-1	MI0000060	hsa-let-7a-5p	MIMAT0000062	0	0	94175962	94175983	chr9	+	1	TGAGGTAGTAGGTTGTCTAGTT	TGAGGTAGTAGGTTGTATAGTT	not reported	17:A-C	not reported	1	1	0	1	GAGGTAG	5p	1.66868	2.37887	2.34378	2.94772	0.406485	0.549445	0.242745	0.45378	[W (T)] and [B/AA (N)] and [B/AA (T)]
let-7a-5p__let-7a-1__0__0__16MT5M	hsa-let-7a-1	MI0000060	hsa-let-7a-5p	MIMAT0000062	0	0	94175962	94175983	chr9	+	1	TGAGGTAGTAGGTTGTTTAGTT	TGAGGTAGTAGGTTGTATAGTT	not reported	17:A-T	not reported	1	0	1	0	GAGGTAG	5p	3.37499	1.75867	3.74534	1.77879	0.608563	0.273379	0.618237	0.266392	[W (N)] and [B/AA (N)]
let-7a-5p__let-7a-1__0__0__17MA4M	hsa-let-7a-1	MI0000060	hsa-let-7a-5p	MIMAT0000062	0	0	94175962	94175983	chr9	+	1	TGAGGTAGTAGGTTGTAAAGTT	TGAGGTAGTAGGTTGTATAGTT	not reported	18:T-A	not reported	1	0	1	0	GAGGTAG	5p	2.02334	1.43439	2.22026	1.48548	0.375314	0.204407	0.360803	0.173952	[W (N)] and [B/AA (N)]
let-7a-5p__let-7a-1__0__0__17MG4M	hsa-let-7a-1	MI0000060	hsa-let-7a-5p	MIMAT0000062	0	0	94175962	94175983	chr9	+	1	TGAGGTAGTAGGTTGTAGAGTT	TGAGGTAGTAGGTTGTATAGTT	not reported	18:T-G	not reported	1	0	1	0	GAGGTAG	5p	2.07407	1.18335	2.25234	1.18275	0.383913	0.0926191	0.380509	0.0773916	[W (N)] and [B/AA (N)]
let-7a-5p__let-7a-1__0__0__18MT3M	hsa-let-7a-1	MI0000060	hsa-let-7a-5p	MIMAT0000062	0	0	94175962	94175983	chr9	+	1	TGAGGTAGTAGGTTGTATTGTT	TGAGGTAGTAGGTTGTATAGTT	not reported	19:A-T	not reported	1	0	1	0	GAGGTAG	5p	2.99623	1.77573	3.81395	1.89762	0.613759	0.301863	0.575779	0.271946	[W (N)] and [B/AA (N)]
let-7a-5p__let-7a-1__0__0__19MC2M	hsa-let-7a-1	MI0000060	hsa-let-7a-5p	MIMAT0000062	0	0	94175962	94175983	chr9	+	1	TGAGGTAGTAGGTTGTATACTT	TGAGGTAGTAGGTTGTATAGTT	not reported	20:G-C	not reported	1	0	1	0	GAGGTAG	5p	2.28102	1.62587	2.6599	1.65083	0.476532	0.239878	0.447689	0.233429	[W (N)] and [B/AA (N)]
let-7a-5p__let-7a-1__0__0__19MT2M	hsa-let-7a-1	MI0000060	hsa-let-7a-5p	MIMAT0000062	0	0	94175962	94175983	chr9	+	1	TGAGGTAGTAGGTTGTATATTT	TGAGGTAGTAGGTTGTATAGTT	not reported	20:G-T	not reported	1	1	1	1	GAGGTAG	5p	6.87046	2.53387	8.63439	2.56511	0.769437	0.487101	0.770512	0.490863	[W (N)] and [W (T)] and [B/AA (N)] and [B/AA (T)]
let-7a-5p__let-7a-1__0__0__1MA20M	hsa-let-7a-1	MI0000060	hsa-let-7a-5p	MIMAT0000062	0	0	94175962	94175983	chr9	+	1	TAAGGTAGTAGGTTGTATAGTT	TGAGGTAGTAGGTTGTATAGTT	not reported	2:G-A	not reported	1	0	1	1	AAGGTAG	5p	2.90269	2.29146	3.66852	1.94359	0.602472	0.313687	0.563956	0.427804	[W (N)] and [W (T)] and [B/AA (N)]
let-7a-5p__let-7a-1__0__0__1MC20M	hsa-let-7a-1	MI0000060	hsa-let-7a-5p	MIMAT0000062	0	0	94175962	94175983	chr9	+	1	TCAGGTAGTAGGTTGTATAGTT	TGAGGTAGTAGGTTGTATAGTT	not reported	2:G-C	not reported	1	0	1	1	CAGGTAG	5p	4.37309	2.04978	5.91463	1.93755	0.709781	0.311716	0.691329	0.353637	[W (N)] and [W (T)] and [B/AA (N)]
let-7a-5p__let-7a-1__0__0__1MT1MT18M	hsa-let-7a-1	MI0000060	hsa-let-7a-5p	MIMAT0000062	0	0	94175962	94175983	chr9	+	2	TTATGTAGTAGGTTGTATAGTT	TGAGGTAGTAGGTTGTATAGTT	TCGA=2:G-T;TCGA=4:G-T	not reported	not reported	0	1	0	1	TATGTAG	5p	1.1534	3.10647	1	2.47649	0.000179147	0.466858	0.0861698	0.574525	[W (T)] and [B/AA (T)]
let-7a-5p__let-7a-1__0__0__1MT20M	hsa-let-7a-1	MI0000060	hsa-let-7a-5p	MIMAT0000062	0	0	94175962	94175983	chr9	+	1	TTAGGTAGTAGGTTGTATAGTT	TGAGGTAGTAGGTTGTATAGTT	TCGA=2:G-T	not reported	not reported	1	1	1	1	TAGGTAG	5p	11.0681	8.83545	14.0732	8.16114	0.826765	0.7732	0.832856	0.788785	[W (N)] and [W (T)] and [B/AA (N)] and [B/AA (T)]
let-7a-5p__let-7a-1__0__0__1MTC19M	hsa-let-7a-1	MI0000060	hsa-let-7a-5p	MIMAT0000062	0	0	94175962	94175983	chr9	+	2	TTCGGTAGTAGGTTGTATAGTT	TGAGGTAGTAGGTTGTATAGTT	TCGA=2:G-T	3:A-C	not reported	0	1	0	1	TCGGTAG	5p	1.02304	3.54415	1	3.00646	0.000179147	0.557327	0.0385167	0.616625	[W (T)] and [B/AA (T)]
let-7a-5p__let-7a-1__0__0__22M	hsa-let-7a-1	MI0000060	hsa-let-7a-5p	MIMAT0000062	0	0	94175962	94175983	chr9	+	0	TGAGGTAGTAGGTTGTATAGTT	TGAGGTAGTAGGTTGTATAGTT	not reported	not reported	not reported	1	1	1	1	GAGGTAG	5p	27732.7	11590.6	32954.1	11694.7	0.999283	0.998209	0.999463	0.998388	[W (N)] and [W (T)] and [B/AA (N)] and [B/AA (T)]
let-7a-5p__let-7a-1__0__0__2MC19M	hsa-let-7a-1	MI0000060	hsa-let-7a-5p	MIMAT0000062	0	0	94175962	94175983	chr9	+	1	TGCGGTAGTAGGTTGTATAGTT	TGAGGTAGTAGGTTGTATAGTT	not reported	3:A-C	not reported	0	1	0	1	GCGGTAG	5p	1.31275	16.1344	1.39294	26.9732	0.166607	0.886062	0.131673	0.849158	[W (T)] and [B/AA (T)]
let-7a-5p__let-7a-1__0__0__2MCT18M	hsa-let-7a-1	MI0000060	hsa-let-7a-5p	MIMAT0000062	0	0	94175962	94175983	chr9	+	2	TGCTGTAGTAGGTTGTATAGTT	TGAGGTAGTAGGTTGTATAGTT	TCGA=4:G-T	3:A-C	not reported	0	1	0	1	GCTGTAG	5p	1.08702	10.156	1	18.4503	0.000179147	0.856682	0.0664636	0.807238	[W (T)] and [B/AA (T)]
let-7a-5p__let-7a-1__0__0__2MG19M	hsa-let-7a-1	MI0000060	hsa-let-7a-5p	MIMAT0000062	0	0	94175962	94175983	chr9	+	1	TGGGGTAGTAGGTTGTATAGTT	TGAGGTAGTAGGTTGTATAGTT	TCGA=3:A-G	not reported	not reported	1	1	1	1	GGGGTAG	5p	7.01229	2.78747	9.35172	2.88812	0.781799	0.540129	0.773916	0.532605	[W (N)] and [W (T)] and [B/AA (N)] and [B/AA (T)]
let-7a-5p__let-7a-1__0__0__2MT19M	hsa-let-7a-1	MI0000060	hsa-let-7a-5p	MIMAT0000062	0	0	94175962	94175983	chr9	+	1	TGTGGTAGTAGGTTGTATAGTT	TGAGGTAGTAGGTTGTATAGTT	not reported	3:A-T	not reported	1	1	1	1	GTGGTAG	5p	17.4904	3.11407	44.6403	2.3889	0.909172	0.448764	0.871551	0.574884	[W (N)] and [W (T)] and [B/AA (N)] and [B/AA (T)]
let-7a-5p__let-7a-1__0__0__3MA18M	hsa-let-7a-1	MI0000060	hsa-let-7a-5p	MIMAT0000062	0	0	94175962	94175983	chr9	+	1	TGAAGTAGTAGGTTGTATAGTT	TGAGGTAGTAGGTTGTATAGTT	not reported	4:G-A	not reported	1	0	1	0	GAAGTAG	5p	2.93292	1.64619	3.43309	1.50016	0.580258	0.207453	0.568076	0.238087	[W (N)] and [B/AA (N)]
let-7a-5p__let-7a-1__0__0__3MC18M	hsa-let-7a-1	MI0000060	hsa-let-7a-5p	MIMAT0000062	0	0	94175962	94175983	chr9	+	1	TGACGTAGTAGGTTGTATAGTT	TGAGGTAGTAGGTTGTATAGTT	not reported	4:G-C	not reported	1	0	1	0	GACGTAG	5p	3.0605	1.47919	3.51116	1.47057	0.58814	0.199928	0.582408	0.18918	[W (N)] and [B/AA (N)]
let-7a-5p__let-7a-1__0__0__3MT18M	hsa-let-7a-1	MI0000060	hsa-let-7a-5p	MIMAT0000062	0	0	94175962	94175983	chr9	+	1	TGATGTAGTAGGTTGTATAGTT	TGAGGTAGTAGGTTGTATAGTT	TCGA=4:G-T	not reported	not reported	1	1	1	1	GATGTAG	5p	8.21848	29.4606	4.30769	25.0485	0.643139	0.879971	0.797026	0.894303	[W (N)] and [W (T)] and [B/AA (N)] and [B/AA (T)]
let-7a-5p__let-7a-1__0__0__4MA17M	hsa-let-7a-1	MI0000060	hsa-let-7a-5p	MIMAT0000062	0	0	94175962	94175983	chr9	+	1	TGAGATAGTAGGTTGTATAGTT	TGAGGTAGTAGGTTGTATAGTT	COSV100762380,TCGA=5:G-A	not reported	not reported	0	1	0	0	GAGATAG	5p	1.97004	1.63904	1.95069	3.47673	0.283053	0.605159	0.343246	0.236116	[B/AA (T)]
let-7a-5p__let-7a-1__0__0__4MT17M	hsa-let-7a-1	MI0000060	hsa-let-7a-5p	MIMAT0000062	0	0	94175962	94175983	chr9	+	1	TGAGTTAGTAGGTTGTATAGTT	TGAGGTAGTAGGTTGTATAGTT	not reported	5:G-T	not reported	1	1	1	0	GAGTTAG	5p	2.38971	1.75222	2.73293	3.00371	0.487818	0.556611	0.472053	0.264601	[W (N)] and [B/AA (N)] and [B/AA (T)]
let-7a-5p__let-7a-1__0__0__5MC16M	hsa-let-7a-1	MI0000060	hsa-let-7a-5p	MIMAT0000062	0	0	94175962	94175983	chr9	+	1	TGAGGCAGTAGGTTGTATAGTT	TGAGGTAGTAGGTTGTATAGTT	not reported	6:T-C	not reported	1	1	1	1	GAGGCAG	5p	4.41408	2.5308	5.61138	2.46344	0.700645	0.463275	0.694016	0.490505	[W (N)] and [W (T)] and [B/AA (N)] and [B/AA (T)]
let-7a-5p__let-7a-1__0__0__5MG16M	hsa-let-7a-1	MI0000060	hsa-let-7a-5p	MIMAT0000062	0	0	94175962	94175983	chr9	+	1	TGAGGGAGTAGGTTGTATAGTT	TGAGGTAGTAGGTTGTATAGTT	not reported	6:T-G	not reported	1	1	1	1	GAGGGAG	5p	8.35472	2.75521	14.1583	2.80194	0.827839	0.529201	0.799176	0.527947	[W (N)] and [W (T)] and [B/AA (N)] and [B/AA (T)]
let-7a-5p__let-7a-1__0__0__6MC15M	hsa-let-7a-1	MI0000060	hsa-let-7a-5p	MIMAT0000062	0	0	94175962	94175983	chr9	+	1	TGAGGTCGTAGGTTGTATAGTT	TGAGGTAGTAGGTTGTATAGTT	TCGA=7:A-C	not reported	not reported	1	0	1	0	GAGGTCG	5p	9.19511	1.33984	3.40891	1.16849	0.577929	0.0856324	0.813687	0.144214	[W (N)] and [B/AA (N)]
let-7a-5p__let-7a-1__0__0__6MC2MC12M	hsa-let-7a-1	MI0000060	hsa-let-7a-5p	MIMAT0000062	0	0	94175962	94175983	chr9	+	2	TGAGGTCGTCGGTTGTATAGTT	TGAGGTAGTAGGTTGTATAGTT	TCGA=7:A-C	10:A-C	not reported	0	0	1	0	GAGGTCG	5p	2.95448	1.01757	1.22259	1.01305	0.126657	0.00412039	0.571301	0.0034038	[W (N)]
let-7a-5p__let-7a-1__0__0__6MG15M	hsa-let-7a-1	MI0000060	hsa-let-7a-5p	MIMAT0000062	0	0	94175962	94175983	chr9	+	1	TGAGGTGGTAGGTTGTATAGTT	TGAGGTAGTAGGTTGTATAGTT	TCGA=7:A-G	not reported	not reported	1	1	1	1	GAGGTGG	5p	9.81445	4.54253	12.8219	4.47507	0.816553	0.668936	0.819061	0.679147	[W (N)] and [W (T)] and [B/AA (N)] and [B/AA (T)]
let-7a-5p__let-7a-1__0__0__6MT15M	hsa-let-7a-1	MI0000060	hsa-let-7a-5p	MIMAT0000062	0	0	94175962	94175983	chr9	+	1	TGAGGTTGTAGGTTGTATAGTT	TGAGGTAGTAGGTTGTATAGTT	not reported	7:A-T	not reported	1	0	1	0	GAGGTTG	5p	3.78245	1.60042	4.0195	1.55283	0.62397	0.218201	0.654067	0.225367	[W (N)] and [B/AA (N)]
let-7a-5p__let-7a-1__0__0__7MA14M	hsa-let-7a-1	MI0000060	hsa-let-7a-5p	MIMAT0000062	0	0	94175962	94175983	chr9	+	1	TGAGGTAATAGGTTGTATAGTT	TGAGGTAGTAGGTTGTATAGTT	not reported	8:G-A	not reported	1	0	0	0	GAGGTAA	5p	1.88529	1.46768	2.19711	1.61765	0.368148	0.231996	0.311716	0.184701	[B/AA (N)]
let-7a-5p__let-7a-1__0__0__7MC14M	hsa-let-7a-1	MI0000060	hsa-let-7a-5p	MIMAT0000062	0	0	94175962	94175983	chr9	+	1	TGAGGTACTAGGTTGTATAGTT	TGAGGTAGTAGGTTGTATAGTT	not reported	8:G-C	not reported	1	0	1	0	GAGGTAC	5p	2.62339	1.77125	3.59734	1.85348	0.59656	0.291114	0.519885	0.270512	[W (N)] and [B/AA (N)]
let-7a-5p__let-7a-1__0__0__7MT14M	hsa-let-7a-1	MI0000060	hsa-let-7a-5p	MIMAT0000062	0	0	94175962	94175983	chr9	+	1	TGAGGTATTAGGTTGTATAGTT	TGAGGTAGTAGGTTGTATAGTT	not reported	8:G-T	not reported	1	0	1	0	GAGGTAT	5p	2.90901	1.90269	3.84389	1.64634	0.615371	0.238982	0.565389	0.304729	[W (N)] and [B/AA (N)]
let-7a-5p__let-7a-1__0__0__8MC13M	hsa-let-7a-1	MI0000060	hsa-let-7a-5p	MIMAT0000062	0	0	94175962	94175983	chr9	+	1	TGAGGTAGCAGGTTGTATAGTT	TGAGGTAGTAGGTTGTATAGTT	not reported	9:T-C	not reported	1	1	1	1	GAGGTAG	5p	3.51805	2.10706	4.253	2.01221	0.639377	0.328914	0.633106	0.372626	[W (N)] and [W (T)] and [B/AA (N)] and [B/AA (T)]
let-7a-5p__let-7a-1__0__0__9MC12M	hsa-let-7a-1	MI0000060	hsa-let-7a-5p	MIMAT0000062	0	0	94175962	94175983	chr9	+	1	TGAGGTAGTCGGTTGTATAGTT	TGAGGTAGTAGGTTGTATAGTT	not reported	10:A-C	not reported	1	0	1	0	GAGGTAG	5p	4.9102	1.29107	2.13869	1.24616	0.348262	0.120566	0.713006	0.123612	[W (N)] and [B/AA (N)]
let-7a-5p__let-7a-1__0__0__9MG12M	hsa-let-7a-1	MI0000060	hsa-let-7a-5p	MIMAT0000062	0	0	94175962	94175983	chr9	+	1	TGAGGTAGTGGGTTGTATAGTT	TGAGGTAGTAGGTTGTATAGTT	not reported	not reported	29233923=10:A-G	1	1	1	1	GAGGTAG	5p	5.40927	2.85401	7.11024	2.70073	0.744357	0.512003	0.731458	0.543354	[W (N)] and [W (T)] and [B/AA (N)] and [B/AA (T)]
let-7a-5p__let-7a-1__0__0__9MT12M	hsa-let-7a-1	MI0000060	hsa-let-7a-5p	MIMAT0000062	0	0	94175962	94175983	chr9	+	1	TGAGGTAGTTGGTTGTATAGTT	TGAGGTAGTAGGTTGTATAGTT	not reported	10:A-T	not reported	1	0	1	0	GAGGTAG	5p	2.24683	1.58549	3.04008	1.5876	0.536009	0.226084	0.438732	0.221784	[W (N)] and [B/AA (N)]
let-7a-5p__let-7a-1__0__0__A21M	hsa-let-7a-1	MI0000060	hsa-let-7a-5p	MIMAT0000062	0	0	94175962	94175983	chr9	+	1	AGAGGTAGTAGGTTGTATAGTT	TGAGGTAGTAGGTTGTATAGTT	rs201607747=1:T-A	not reported	not reported	1	0	0	0	GAGGTAG	5p	1.98075	1.90026	2.12262	1.73073	0.343425	0.262092	0.346471	0.303834	[B/AA (N)]
let-7b-3p__let-7b__0__-1__20MT	hsa-let-7b	MI0000063	hsa-let-7b-3p	MIMAT0004482	0	-1	46113745	46113765	chr22	+	1	CTATACAACCTACTGCCTTCT	CTATACAACCTACTGCCTTCC	rs1184270060=21:C-T	not reported	not reported	1	1	1	1	TATACAA	3p	7.14611	4.70035	5.57519	3.92838	0.699212	0.637764	0.776424	0.686851	[W (N)] and [W (T)] and [B/AA (N)] and [B/AA (T)]
let-7b-3p__let-7b__0__-1__21M	hsa-let-7b	MI0000063	hsa-let-7b-3p	MIMAT0004482	0	-1	46113745	46113765	chr22	+	0	CTATACAACCTACTGCCTTCC	CTATACAACCTACTGCCTTCC	not reported	not reported	not reported	1	1	1	1	TATACAA	3p	28.9303	15.0268	22.5377	13.4728	0.866356	0.831781	0.902365	0.842709	[W (N)] and [W (T)] and [B/AA (N)] and [B/AA (T)]
let-7b-3p__let-7b__0__-2__20M	hsa-let-7b	MI0000063	hsa-let-7b-3p	MIMAT0004482	0	-2	46113745	46113764	chr22	+	0	CTATACAACCTACTGCCTTC	CTATACAACCTACTGCCTTC	not reported	not reported	not reported	1	1	1	1	TATACAA	3p	8.45487	5.2021	7.40728	4.68955	0.750627	0.676281	0.800788	0.706378	[W (N)] and [W (T)] and [B/AA (N)] and [B/AA (T)]
let-7b-5p__let-7b__-1__-6__17M	hsa-let-7b	MI0000063	hsa-let-7b-5p	MIMAT0000063	-1	-6	46113690	46113706	chr22	+	0	GTGAGGTAGTAGGTTGT	GTGAGGTAGTAGGTTGT	not reported	not reported	not reported	0	1	0	1	TGAGGTA	5p	1.52651	2.38488	1.80627	3.01137	0.255464	0.558044	0.192046	0.454497	[W (T)] and [B/AA (T)]
let-7b-5p__let-7b__+1__-2__19M	hsa-let-7b	MI0000063	hsa-let-7b-5p	MIMAT0000063	1	-2	46113692	46113710	chr22	+	0	GAGGTAGTAGGTTGTGTGG	GAGGTAGTAGGTTGTGTGG	not reported	not reported	not reported	1	1	1	1	AGGTAGT	5p	3.84091	2.67423	2.98484	2.32317	0.527589	0.431924	0.65765	0.51254	[W (N)] and [W (T)] and [B/AA (N)] and [B/AA (T)]
let-7b-5p__let-7b__+1__0__21M	hsa-let-7b	MI0000063	hsa-let-7b-5p	MIMAT0000063	1	0	46113692	46113712	chr22	+	0	GAGGTAGTAGGTTGTGTGGTT	GAGGTAGTAGGTTGTGTGGTT	not reported	not reported	not reported	0	1	1	1	AGGTAGT	5p	2.70483	2.36098	1.76062	2.07489	0.245432	0.352383	0.535113	0.447868	[W (N)] and [W (T)] and [B/AA (T)]
let-7b-5p__let-7b__+3__+1__20M	hsa-let-7b	MI0000063	hsa-let-7b-5p	MIMAT0000063	3	1	46113694	46113713	chr22	+	0	GGTAGTAGGTTGTGTGGTTT	GGTAGTAGGTTGTGTGGTTT	not reported	not reported	not reported	0	0	1	1	GTAGTAG	5p	2.40425	2.00833	1.4882	1.87673	0.190075	0.296847	0.477607	0.337334	[W (N)] and [W (T)]
let-7b-5p__let-7b__+3__0__19M	hsa-let-7b	MI0000063	hsa-let-7b-5p	MIMAT0000063	3	0	46113694	46113712	chr22	+	0	GGTAGTAGGTTGTGTGGTT	GGTAGTAGGTTGTGTGGTT	not reported	not reported	not reported	1	1	1	1	GTAGTAG	5p	5.00608	3.998	2.59364	3.01961	0.463991	0.558402	0.716231	0.649767	[W (N)] and [W (T)] and [B/AA (N)] and [B/AA (T)]
let-7b-5p__let-7b__+4__+1__19M	hsa-let-7b	MI0000063	hsa-let-7b-5p	MIMAT0000063	4	1	46113695	46113713	chr22	+	0	GTAGTAGGTTGTGTGGTTT	GTAGTAGGTTGTGTGGTTT	not reported	not reported	not reported	0	0	1	0	TAGTAGG	5p	2.34041	1.71278	1.42725	1.59793	0.176818	0.228054	0.460946	0.255643	[W (N)]
let-7b-5p__let-7b__+4__0__18M	hsa-let-7b	MI0000063	hsa-let-7b-5p	MIMAT0000063	4	0	46113695	46113712	chr22	+	0	GTAGTAGGTTGTGTGGTT	GTAGTAGGTTGTGTGGTT	not reported	not reported	not reported	1	1	1	1	TAGTAGG	5p	4.06584	2.52749	2.82141	2.21317	0.503583	0.398961	0.672877	0.489789	[W (N)] and [W (T)] and [B/AA (N)] and [B/AA (T)]
let-7b-5p__let-7b__0__-1__13MG7M	hsa-let-7b	MI0000063	hsa-let-7b-5p	MIMAT0000063	0	-1	46113691	46113711	chr22	+	1	TGAGGTAGTAGGTGGTGTGGT	TGAGGTAGTAGGTTGTGTGGT	not reported	14:T-G	not reported	1	0	1	0	GAGGTAG	5p	2.12628	1.33446	2.07077	1.27533	0.325511	0.133465	0.402902	0.142064	[W (N)] and [B/AA (N)]
let-7b-5p__let-7b__0__-1__14MC6M	hsa-let-7b	MI0000063	hsa-let-7b-5p	MIMAT0000063	0	-1	46113691	46113711	chr22	+	1	TGAGGTAGTAGGTTCTGTGGT	TGAGGTAGTAGGTTGTGTGGT	not reported	15:G-C	not reported	1	0	1	0	GAGGTAG	5p	3.21621	1.63112	3.24364	1.59019	0.559298	0.226442	0.602651	0.234325	[W (N)] and [B/AA (N)]
let-7b-5p__let-7b__0__-1__1MT19M	hsa-let-7b	MI0000063	hsa-let-7b-5p	MIMAT0000063	0	-1	46113691	46113711	chr22	+	1	TTAGGTAGTAGGTTGTGTGGT	TGAGGTAGTAGGTTGTGTGGT	not reported	2:G-T	not reported	1	1	1	1	TAGGTAG	5p	2.83356	2.34066	2.77361	2.06915	0.49588	0.349516	0.55249	0.44321	[W (N)] and [W (T)] and [B/AA (N)] and [B/AA (T)]
let-7b-5p__let-7b__0__-1__20MG	hsa-let-7b	MI0000063	hsa-let-7b-5p	MIMAT0000063	0	-1	46113691	46113711	chr22	+	1	TGAGGTAGTAGGTTGTGTGGG	TGAGGTAGTAGGTTGTGTGGT	COSV100659503,TCGA=21:T-G	not reported	not reported	1	0	1	0	GAGGTAG	5p	2.92043	1.62835	2.61018	1.59233	0.467574	0.226621	0.566643	0.234145	[W (N)] and [B/AA (N)]
let-7b-5p__let-7b__0__-1__21M	hsa-let-7b	MI0000063	hsa-let-7b-5p	MIMAT0000063	0	-1	46113691	46113711	chr22	+	0	TGAGGTAGTAGGTTGTGTGGT	TGAGGTAGTAGGTTGTGTGGT	not reported	not reported	not reported	1	1	1	1	GAGGTAG	5p	3169.82	1718.34	3020.76	1577.79	0.992834	0.990505	0.994088	0.991401	[W (N)] and [W (T)] and [B/AA (N)] and [B/AA (T)]
let-7b-5p__let-7b__0__-1__2MC18M	hsa-let-7b	MI0000063	hsa-let-7b-5p	MIMAT0000063	0	-1	46113691	46113711	chr22	+	1	TGCGGTAGTAGGTTGTGTGGT	TGAGGTAGTAGGTTGTGTGGT	not reported	3:A-C	not reported	0	1	0	1	GCGGTAG	5p	1.18698	4.68068	1	6.40922	0.000179147	0.742028	0.0953063	0.685955	[W (T)] and [B/AA (T)]
let-7b-5p__let-7b__0__-1__2MCT17M	hsa-let-7b	MI0000063	hsa-let-7b-5p	MIMAT0000063	0	-1	46113691	46113711	chr22	+	2	TGCTGTAGTAGGTTGTGTGGT	TGAGGTAGTAGGTTGTGTGGT	not reported	3:A-C;4:G-T	not reported	0	1	0	1	GCTGTAG	5p	1.07018	3.63015	1	4.6856	0.000179147	0.675564	0.0609101	0.62397	[W (T)] and [B/AA (T)]
let-7b-5p__let-7b__0__-1__2MG18M	hsa-let-7b	MI0000063	hsa-let-7b-5p	MIMAT0000063	0	-1	46113691	46113711	chr22	+	1	TGGGGTAGTAGGTTGTGTGGT	TGAGGTAGTAGGTTGTGTGGT	TCGA=3:A-G	not reported	not reported	0	0	1	0	GGGGTAG	5p	2.21048	1.30491	1.90995	1.26049	0.276245	0.128807	0.429774	0.130777	[W (N)]
let-7b-5p__let-7b__0__-1__2MT18M	hsa-let-7b	MI0000063	hsa-let-7b-5p	MIMAT0000063	0	-1	46113691	46113711	chr22	+	1	TGTGGTAGTAGGTTGTGTGGT	TGAGGTAGTAGGTTGTGTGGT	not reported	3:A-T	not reported	1	0	1	0	GTGGTAG	5p	3.42452	1.5157	4.74926	1.30177	0.66589	0.143676	0.623612	0.20172	[W (N)] and [B/AA (N)]
let-7b-5p__let-7b__0__-1__3MT17M	hsa-let-7b	MI0000063	hsa-let-7b-5p	MIMAT0000063	0	-1	46113691	46113711	chr22	+	1	TGATGTAGTAGGTTGTGTGGT	TGAGGTAGTAGGTTGTGTGGT	not reported	4:G-T	not reported	0	1	1	1	GATGTAG	5p	3.283	7.35636	1.42465	5.50615	0.176102	0.713006	0.608742	0.763884	[W (N)] and [W (T)] and [B/AA (T)]
let-7b-5p__let-7b__0__-1__5MG15M	hsa-let-7b	MI0000063	hsa-let-7b-5p	MIMAT0000063	0	-1	46113691	46113711	chr22	+	1	TGAGGGAGTAGGTTGTGTGGT	TGAGGTAGTAGGTTGTGTGGT	not reported	6:T-G	not reported	1	0	1	0	GAGGGAG	5p	2.11473	1.32667	2.13155	1.36017	0.346292	0.16589	0.398065	0.13866	[W (N)] and [B/AA (N)]
let-7b-5p__let-7b__0__-1__6MC14M	hsa-let-7b	MI0000063	hsa-let-7b-5p	MIMAT0000063	0	-1	46113691	46113711	chr22	+	1	TGAGGTCGTAGGTTGTGTGGT	TGAGGTAGTAGGTTGTGTGGT	not reported	7:A-C	not reported	0	0	1	0	GAGGTCG	5p	3.62503	1.09312	1.67836	1.03469	0.230383	0.0114654	0.642243	0.0270512	[W (N)]
let-7b-5p__let-7b__0__-1__6MC2MC11M	hsa-let-7b	MI0000063	hsa-let-7b-5p	MIMAT0000063	0	-1	46113691	46113711	chr22	+	2	TGAGGTCGTCGGTTGTGTGGT	TGAGGTAGTAGGTTGTGTGGT	not reported	7:A-C;10:A-C	not reported	0	0	1	0	GAGGTCG	5p	2.18034	1.01691	1.03577	1.0041	0.063239	0.00125403	0.421175	0.00322465	[W (N)]
let-7b-5p__let-7b__0__-1__6MG14M	hsa-let-7b	MI0000063	hsa-let-7b-5p	MIMAT0000063	0	-1	46113691	46113711	chr22	+	1	TGAGGTGGTAGGTTGTGTGGT	TGAGGTAGTAGGTTGTGTGGT	not reported	7:A-G	not reported	0	0	1	0	GAGGTGG	5p	2.41592	1.45502	1.95252	1.4107	0.283411	0.183447	0.480831	0.179864	[W (N)]
let-7b-5p__let-7b__0__-1__9MC11M	hsa-let-7b	MI0000063	hsa-let-7b-5p	MIMAT0000063	0	-1	46113691	46113711	chr22	+	1	TGAGGTAGTCGGTTGTGTGGT	TGAGGTAGTAGGTTGTGTGGT	not reported	10:A-C	not reported	0	0	1	0	GAGGTAG	5p	3.30933	1.08331	1.14036	1.0419	0.102831	0.0155858	0.611609	0.0220351	[W (N)]
let-7b-5p__let-7b__0__-2__10MT9M	hsa-let-7b	MI0000063	hsa-let-7b-5p	MIMAT0000063	0	-2	46113691	46113710	chr22	+	1	TGAGGTAGTATGTTGTGTGG	TGAGGTAGTAGGTTGTGTGG	not reported	11:G-T	not reported	1	0	1	0	GAGGTAG	5p	2.02667	1.37005	2.18306	1.30405	0.363848	0.144751	0.361698	0.154067	[W (N)] and [B/AA (N)]
let-7b-5p__let-7b__0__-2__11MA6MA1M	hsa-let-7b	MI0000063	hsa-let-7b-5p	MIMAT0000063	0	-2	46113691	46113710	chr22	+	2	TGAGGTAGTAGATTGTGTAG	TGAGGTAGTAGGTTGTGTGG	rs1209727973=19:G-A	12:G-A	not reported	1	0	0	0	GAGGTAG	5p	1.87646	1.17976	2.26737	1.18086	0.388033	0.0919025	0.308133	0.0748836	[B/AA (N)]
let-7b-5p__let-7b__0__-2__11MC8M	hsa-let-7b	MI0000063	hsa-let-7b-5p	MIMAT0000063	0	-2	46113691	46113710	chr22	+	1	TGAGGTAGTAGCTTGTGTGG	TGAGGTAGTAGGTTGTGTGG	not reported	12:G-C	not reported	0	0	1	0	GAGGTAG	5p	2.13268	1.43982	1.91011	1.43255	0.276424	0.190254	0.404335	0.175385	[W (N)]
let-7b-5p__let-7b__0__-2__11MT8M	hsa-let-7b	MI0000063	hsa-let-7b-5p	MIMAT0000063	0	-2	46113691	46113710	chr22	+	1	TGAGGTAGTAGTTTGTGTGG	TGAGGTAGTAGGTTGTGTGG	not reported	12:G-T	not reported	0	0	1	0	GAGGTAG	5p	2.27023	1.57823	1.99859	1.55871	0.292727	0.219455	0.444823	0.219993	[W (N)]
let-7b-5p__let-7b__0__-2__12MC7M	hsa-let-7b	MI0000063	hsa-let-7b-5p	MIMAT0000063	0	-2	46113691	46113710	chr22	+	1	TGAGGTAGTAGGCTGTGTGG	TGAGGTAGTAGGTTGTGTGG	not reported	13:T-C	not reported	0	0	1	0	GAGGTAG	5p	2.25396	1.58561	1.84525	1.44338	0.264242	0.194196	0.441598	0.221963	[W (N)]
let-7b-5p__let-7b__0__-2__12MG7M	hsa-let-7b	MI0000063	hsa-let-7b-5p	MIMAT0000063	0	-2	46113691	46113710	chr22	+	1	TGAGGTAGTAGGGTGTGTGG	TGAGGTAGTAGGTTGTGTGG	not reported	13:T-G	not reported	1	0	1	0	GAGGTAG	5p	2.46475	1.34734	2.29148	1.25097	0.394124	0.123253	0.490684	0.14708	[W (N)] and [B/AA (N)]
let-7b-5p__let-7b__0__-2__13MC6M	hsa-let-7b	MI0000063	hsa-let-7b-5p	MIMAT0000063	0	-2	46113691	46113710	chr22	+	1	TGAGGTAGTAGGTCGTGTGG	TGAGGTAGTAGGTTGTGTGG	not reported	14:T-C	not reported	1	0	0	0	GAGGTAG	5p	1.93998	1.62033	2.12811	1.53505	0.345217	0.215156	0.332318	0.231637	[B/AA (N)]
let-7b-5p__let-7b__0__-2__13MG6M	hsa-let-7b	MI0000063	hsa-let-7b-5p	MIMAT0000063	0	-2	46113691	46113710	chr22	+	1	TGAGGTAGTAGGTGGTGTGG	TGAGGTAGTAGGTTGTGTGG	not reported	14:T-G	not reported	1	1	1	1	GAGGTAG	5p	6.60771	2.7456	5.80197	2.49184	0.706557	0.469903	0.765138	0.525618	[W (N)] and [W (T)] and [B/AA (N)] and [B/AA (T)]
let-7b-5p__let-7b__0__-2__14MC5M	hsa-let-7b	MI0000063	hsa-let-7b-5p	MIMAT0000063	0	-2	46113691	46113710	chr22	+	1	TGAGGTAGTAGGTTCTGTGG	TGAGGTAGTAGGTTGTGTGG	not reported	15:G-C	not reported	1	1	1	1	GAGGTAG	5p	6.49729	2.82484	5.33377	2.48089	0.689717	0.468112	0.762988	0.539054	[W (N)] and [W (T)] and [B/AA (N)] and [B/AA (T)]
let-7b-5p__let-7b__0__-2__14MT5M	hsa-let-7b	MI0000063	hsa-let-7b-5p	MIMAT0000063	0	-2	46113691	46113710	chr22	+	1	TGAGGTAGTAGGTTTTGTGG	TGAGGTAGTAGGTTGTGTGG	not reported	15:G-T	not reported	1	0	1	0	GAGGTAG	5p	3.50502	1.84549	2.88998	1.69472	0.514869	0.252598	0.631673	0.288427	[W (N)] and [B/AA (N)]
let-7b-5p__let-7b__0__-2__15MC4M	hsa-let-7b	MI0000063	hsa-let-7b-5p	MIMAT0000063	0	-2	46113691	46113710	chr22	+	1	TGAGGTAGTAGGTTGCGTGG	TGAGGTAGTAGGTTGTGTGG	not reported	16:T-C	not reported	0	0	1	0	GAGGTAG	5p	2.41571	1.833	1.9128	1.69327	0.276783	0.251523	0.480652	0.284665	[W (N)]
let-7b-5p__let-7b__0__-2__15MG4M	hsa-let-7b	MI0000063	hsa-let-7b-5p	MIMAT0000063	0	-2	46113691	46113710	chr22	+	1	TGAGGTAGTAGGTTGGGTGG	TGAGGTAGTAGGTTGTGTGG	not reported	16:T-G	not reported	0	0	1	0	GAGGTAG	5p	2.03277	1.35892	1.72941	1.3153	0.240057	0.150125	0.363311	0.150663	[W (N)]
let-7b-5p__let-7b__0__-2__16MC3M	hsa-let-7b	MI0000063	hsa-let-7b-5p	MIMAT0000063	0	-2	46113691	46113710	chr22	+	1	TGAGGTAGTAGGTTGTCTGG	TGAGGTAGTAGGTTGTGTGG	not reported	17:G-C	not reported	0	0	1	0	GAGGTAG	5p	2.06569	1.46514	1.8005	1.34052	0.254389	0.158187	0.377284	0.183805	[W (N)]
let-7b-5p__let-7b__0__-2__16MT1MA1M	hsa-let-7b	MI0000063	hsa-let-7b-5p	MIMAT0000063	0	-2	46113691	46113710	chr22	+	2	TGAGGTAGTAGGTTGTTTAG	TGAGGTAGTAGGTTGTGTGG	rs1209727973=19:G-A	17:G-T	not reported	1	0	1	0	GAGGTAG	5p	2.45513	1.46718	3.06471	1.50751	0.538875	0.208886	0.488714	0.184522	[W (N)] and [B/AA (N)]
let-7b-5p__let-7b__0__-2__16MT3M	hsa-let-7b	MI0000063	hsa-let-7b-5p	MIMAT0000063	0	-2	46113691	46113710	chr22	+	1	TGAGGTAGTAGGTTGTTTGG	TGAGGTAGTAGGTTGTGTGG	not reported	17:G-T	not reported	1	0	1	0	GAGGTAG	5p	5.99912	1.96209	3.51592	1.57433	0.588857	0.223038	0.750627	0.322644	[W (N)] and [B/AA (N)]
let-7b-5p__let-7b__0__-2__17MAA1M	hsa-let-7b	MI0000063	hsa-let-7b-5p	MIMAT0000063	0	-2	46113691	46113710	chr22	+	2	TGAGGTAGTAGGTTGTGAAG	TGAGGTAGTAGGTTGTGTGG	rs1209727973=19:G-A	18:T-A	not reported	1	0	1	0	GAGGTAG	5p	2.13805	1.33163	2.28225	1.24944	0.392332	0.122537	0.406127	0.140989	[W (N)] and [B/AA (N)]
let-7b-5p__let-7b__0__-2__18MA1M	hsa-let-7b	MI0000063	hsa-let-7b-5p	MIMAT0000063	0	-2	46113691	46113710	chr22	+	1	TGAGGTAGTAGGTTGTGTAG	TGAGGTAGTAGGTTGTGTGG	rs1209727973=19:G-A	not reported	not reported	1	1	1	1	GAGGTAG	5p	38.6316	12.9877	29.1166	10.6788	0.884987	0.804729	0.916697	0.829989	[W (N)] and [W (T)] and [B/AA (N)] and [B/AA (T)]
let-7b-5p__let-7b__0__-2__1MA18M	hsa-let-7b	MI0000063	hsa-let-7b-5p	MIMAT0000063	0	-2	46113691	46113710	chr22	+	1	TAAGGTAGTAGGTTGTGTGG	TGAGGTAGTAGGTTGTGTGG	not reported	2:G-A	not reported	0	0	1	0	AAGGTAG	5p	2.00072	1.56062	1.6305	1.3843	0.221068	0.173056	0.352383	0.214618	[W (N)]
let-7b-5p__let-7b__0__-2__1MC18M	hsa-let-7b	MI0000063	hsa-let-7b-5p	MIMAT0000063	0	-2	46113691	46113710	chr22	+	1	TCAGGTAGTAGGTTGTGTGG	TGAGGTAGTAGGTTGTGTGG	not reported	2:G-C	not reported	1	0	1	0	CAGGTAG	5p	2.34011	1.48587	2.153	1.32427	0.354532	0.153171	0.460767	0.191688	[W (N)] and [B/AA (N)]
let-7b-5p__let-7b__0__-2__1MT18M	hsa-let-7b	MI0000063	hsa-let-7b-5p	MIMAT0000063	0	-2	46113691	46113710	chr22	+	1	TTAGGTAGTAGGTTGTGTGG	TGAGGTAGTAGGTTGTGTGG	not reported	2:G-T	not reported	1	1	1	1	TAGGTAG	5p	5.81145	4.97073	5.16896	4.17403	0.684343	0.653171	0.745432	0.699033	[W (N)] and [W (T)] and [B/AA (N)] and [B/AA (T)]
let-7b-5p__let-7b__0__-2__1MT1MT16M	hsa-let-7b	MI0000063	hsa-let-7b-5p	MIMAT0000063	0	-2	46113691	46113710	chr22	+	2	TTATGTAGTAGGTTGTGTGG	TGAGGTAGTAGGTTGTGTGG	not reported	2:G-T;4:G-T	not reported	0	0	0	1	TATGTAG	5p	1.2393	2.12867	1	1.94037	0.000179147	0.312433	0.10928	0.381225	[W (T)]
let-7b-5p__let-7b__0__-2__1MTC17M	hsa-let-7b	MI0000063	hsa-let-7b-5p	MIMAT0000063	0	-2	46113691	46113710	chr22	+	2	TTCGGTAGTAGGTTGTGTGG	TGAGGTAGTAGGTTGTGTGG	not reported	2:G-T;3:A-C	not reported	0	1	0	1	TCGGTAG	5p	1.04336	2.36347	1	2.20022	0.000179147	0.39502	0.0501612	0.448585	[W (T)] and [B/AA (T)]
let-7b-5p__let-7b__0__-2__20M	hsa-let-7b	MI0000063	hsa-let-7b-5p	MIMAT0000063	0	-2	46113691	46113710	chr22	+	0	TGAGGTAGTAGGTTGTGTGG	TGAGGTAGTAGGTTGTGTGG	not reported	not reported	not reported	1	1	1	1	GAGGTAG	5p	10157.3	5536.74	8917.8	4949.81	0.996596	0.996059	0.998029	0.996417	[W (N)] and [W (T)] and [B/AA (N)] and [B/AA (T)]
let-7b-5p__let-7b__0__-2__2MC17M	hsa-let-7b	MI0000063	hsa-let-7b-5p	MIMAT0000063	0	-2	46113691	46113710	chr22	+	1	TGCGGTAGTAGGTTGTGTGG	TGAGGTAGTAGGTTGTGTGG	not reported	3:A-C	not reported	0	1	0	1	GCGGTAG	5p	1.27017	9.00057	1.019	13.6981	0.0551774	0.833035	0.119312	0.792368	[W (T)] and [B/AA (T)]
let-7b-5p__let-7b__0__-2__2MCT16M	hsa-let-7b	MI0000063	hsa-let-7b-5p	MIMAT0000063	0	-2	46113691	46113710	chr22	+	2	TGCTGTAGTAGGTTGTGTGG	TGAGGTAGTAGGTTGTGTGG	not reported	3:A-C;4:G-T	not reported	0	1	0	1	GCTGTAG	5p	1.11672	6.0228	1	9.6308	0.000179147	0.792727	0.0761376	0.73522	[W (T)] and [B/AA (T)]
let-7b-5p__let-7b__0__-2__2MG17M	hsa-let-7b	MI0000063	hsa-let-7b-5p	MIMAT0000063	0	-2	46113691	46113710	chr22	+	1	TGGGGTAGTAGGTTGTGTGG	TGAGGTAGTAGGTTGTGTGG	TCGA=3:A-G	not reported	not reported	1	0	1	0	GGGGTAG	5p	4.79879	1.99907	3.76357	1.86362	0.610534	0.293443	0.708886	0.331243	[W (N)] and [B/AA (N)]
let-7b-5p__let-7b__0__-2__2MT17M	hsa-let-7b	MI0000063	hsa-let-7b-5p	MIMAT0000063	0	-2	46113691	46113710	chr22	+	1	TGTGGTAGTAGGTTGTGTGG	TGAGGTAGTAGGTTGTGTGG	not reported	3:A-T	not reported	1	0	1	1	GTGGTAG	5p	7.70145	2.32476	13.3301	1.82388	0.819778	0.284665	0.787531	0.437119	[W (N)] and [W (T)] and [B/AA (N)]
let-7b-5p__let-7b__0__-2__3MC16M	hsa-let-7b	MI0000063	hsa-let-7b-5p	MIMAT0000063	0	-2	46113691	46113710	chr22	+	1	TGACGTAGTAGGTTGTGTGG	TGAGGTAGTAGGTTGTGTGG	not reported	4:G-C	not reported	0	0	1	0	GACGTAG	5p	2.13352	1.2711	1.80354	1.26732	0.254747	0.131136	0.405052	0.115371	[W (N)]
let-7b-5p__let-7b__0__-2__3MT16M	hsa-let-7b	MI0000063	hsa-let-7b-5p	MIMAT0000063	0	-2	46113691	46113710	chr22	+	1	TGATGTAGTAGGTTGTGTGG	TGAGGTAGTAGGTTGTGTGG	not reported	4:G-T	not reported	1	1	1	1	GATGTAG	5p	6.13686	15.9295	2.26799	12.021	0.388391	0.817628	0.754747	0.848262	[W (N)] and [W (T)] and [B/AA (N)] and [B/AA (T)]
let-7b-5p__let-7b__0__-2__4MA15M	hsa-let-7b	MI0000063	hsa-let-7b-5p	MIMAT0000063	0	-2	46113691	46113710	chr22	+	1	TGAGATAGTAGGTTGTGTGG	TGAGGTAGTAGGTTGTGTGG	not reported	5:G-A	not reported	0	1	0	0	GAGATAG	5p	1.44867	1.3137	1.39858	2.05276	0.168578	0.34235	0.169832	0.133106	[B/AA (T)]
let-7b-5p__let-7b__0__-2__5MC14M	hsa-let-7b	MI0000063	hsa-let-7b-5p	MIMAT0000063	0	-2	46113691	46113710	chr22	+	1	TGAGGCAGTAGGTTGTGTGG	TGAGGTAGTAGGTTGTGTGG	not reported	6:T-C	not reported	1	0	1	0	GAGGCAG	5p	2.81265	1.95594	2.61415	1.80679	0.469545	0.280724	0.549445	0.321032	[W (N)] and [B/AA (N)]
let-7b-5p__let-7b__0__-2__5MG14M	hsa-let-7b	MI0000063	hsa-let-7b-5p	MIMAT0000063	0	-2	46113691	46113710	chr22	+	1	TGAGGGAGTAGGTTGTGTGG	TGAGGTAGTAGGTTGTGTGG	not reported	6:T-G	not reported	1	1	1	0	GAGGGAG	5p	3.28401	1.90169	4.47057	2.08912	0.6512	0.356503	0.609101	0.304371	[W (N)] and [B/AA (N)] and [B/AA (T)]
let-7b-5p__let-7b__0__-2__6MC13M	hsa-let-7b	MI0000063	hsa-let-7b-5p	MIMAT0000063	0	-2	46113691	46113710	chr22	+	1	TGAGGTCGTAGGTTGTGTGG	TGAGGTAGTAGGTTGTGTGG	not reported	7:A-C	not reported	1	0	1	0	GAGGTCG	5p	5.88805	1.21817	2.24586	1.11932	0.382479	0.0580437	0.746865	0.0933357	[W (N)] and [B/AA (N)]
let-7b-5p__let-7b__0__-2__6MC2MC10M	hsa-let-7b	MI0000063	hsa-let-7b-5p	MIMAT0000063	0	-2	46113691	46113710	chr22	+	2	TGAGGTCGTCGGTTGTGTGG	TGAGGTAGTAGGTTGTGTGG	not reported	7:A-C;10:A-C	not reported	0	0	1	0	GAGGTCG	5p	2.8493	1.02604	1.2892	1.0158	0.141168	0.00501612	0.556431	0.00501612	[W (N)]
let-7b-5p__let-7b__0__-2__6MG13M	hsa-let-7b	MI0000063	hsa-let-7b-5p	MIMAT0000063	0	-2	46113691	46113710	chr22	+	1	TGAGGTGGTAGGTTGTGTGG	TGAGGTAGTAGGTTGTGTGG	not reported	7:A-G	not reported	1	1	1	1	GAGGTGG	5p	5.9995	2.67312	6.46038	2.42812	0.728234	0.457363	0.750806	0.512003	[W (N)] and [W (T)] and [B/AA (N)] and [B/AA (T)]
let-7b-5p__let-7b__0__-2__6MT13M	hsa-let-7b	MI0000063	hsa-let-7b-5p	MIMAT0000063	0	-2	46113691	46113710	chr22	+	1	TGAGGTTGTAGGTTGTGTGG	TGAGGTAGTAGGTTGTGTGG	not reported	7:A-T	not reported	0	0	1	0	GAGGTTG	5p	2.34189	1.31487	1.8658	1.32203	0.268721	0.152813	0.461304	0.133286	[W (N)]
let-7b-5p__let-7b__0__-2__7MC12M	hsa-let-7b	MI0000063	hsa-let-7b-5p	MIMAT0000063	0	-2	46113691	46113710	chr22	+	1	TGAGGTACTAGGTTGTGTGG	TGAGGTAGTAGGTTGTGTGG	not reported	8:G-C	not reported	0	0	1	0	GAGGTAC	5p	2.30703	1.57096	1.99048	1.51457	0.28986	0.21014	0.453422	0.21641	[W (N)]
let-7b-5p__let-7b__0__-2__7MT12M	hsa-let-7b	MI0000063	hsa-let-7b-5p	MIMAT0000063	0	-2	46113691	46113710	chr22	+	1	TGAGGTATTAGGTTGTGTGG	TGAGGTAGTAGGTTGTGTGG	not reported	8:G-T	not reported	1	0	1	0	GAGGTAT	5p	2.37076	1.60788	2.18048	1.40728	0.363311	0.182372	0.46847	0.227696	[W (N)] and [B/AA (N)]
let-7b-5p__let-7b__0__-2__8MC11M	hsa-let-7b	MI0000063	hsa-let-7b-5p	MIMAT0000063	0	-2	46113691	46113710	chr22	+	1	TGAGGTAGCAGGTTGTGTGG	TGAGGTAGTAGGTTGTGTGG	not reported	9:T-C	not reported	1	0	1	0	GAGGTAG	5p	2.29645	1.64022	2.14135	1.54804	0.349516	0.217306	0.45163	0.236654	[W (N)] and [B/AA (N)]
let-7b-5p__let-7b__0__-2__9MC10M	hsa-let-7b	MI0000063	hsa-let-7b-5p	MIMAT0000063	0	-2	46113691	46113710	chr22	+	1	TGAGGTAGTCGGTTGTGTGG	TGAGGTAGTAGGTTGTGTGG	not reported	10:A-C	not reported	0	0	1	0	GAGGTAG	5p	4.15799	1.23342	1.50284	1.13871	0.193658	0.0677177	0.679864	0.100322	[W (N)]
let-7b-5p__let-7b__0__-2__9MG10M	hsa-let-7b	MI0000063	hsa-let-7b-5p	MIMAT0000063	0	-2	46113691	46113710	chr22	+	1	TGAGGTAGTGGGTTGTGTGG	TGAGGTAGTAGGTTGTGTGG	not reported	10:A-G	not reported	1	1	1	1	GAGGTAG	5p	3.93194	2.15249	3.21847	2.01923	0.556073	0.331064	0.664457	0.389645	[W (N)] and [W (T)] and [B/AA (N)] and [B/AA (T)]
let-7b-5p__let-7b__0__-3__18MA	hsa-let-7b	MI0000063	hsa-let-7b-5p	MIMAT0000063	0	-3	46113691	46113709	chr22	+	1	TGAGGTAGTAGGTTGTGTA	TGAGGTAGTAGGTTGTGTG	rs1209727973=19:G-A	not reported	not reported	1	1	1	1	GAGGTAG	5p	14.9407	4.68002	13.9653	3.98594	0.825152	0.642064	0.859907	0.685776	[W (N)] and [W (T)] and [B/AA (N)] and [B/AA (T)]
let-7b-5p__let-7b__0__-3__19M	hsa-let-7b	MI0000063	hsa-let-7b-5p	MIMAT0000063	0	-3	46113691	46113709	chr22	+	0	TGAGGTAGTAGGTTGTGTG	TGAGGTAGTAGGTTGTGTG	not reported	not reported	not reported	1	1	1	1	GAGGTAG	5p	862.252	508.85	796.543	434.668	0.984593	0.976532	0.986922	0.980115	[W (N)] and [W (T)] and [B/AA (N)] and [B/AA (T)]
let-7b-5p__let-7b__0__-3__2MC16M	hsa-let-7b	MI0000063	hsa-let-7b-5p	MIMAT0000063	0	-3	46113691	46113709	chr22	+	1	TGCGGTAGTAGGTTGTGTG	TGAGGTAGTAGGTTGTGTG	not reported	3:A-C	not reported	0	1	0	1	GCGGTAG	5p	1.04685	2.40078	1	2.73949	0.000179147	0.517019	0.0519527	0.458617	[W (T)] and [B/AA (T)]
let-7b-5p__let-7b__0__-3__2MCT15M	hsa-let-7b	MI0000063	hsa-let-7b-5p	MIMAT0000063	0	-3	46113691	46113709	chr22	+	2	TGCTGTAGTAGGTTGTGTG	TGAGGTAGTAGGTTGTGTG	not reported	3:A-C;4:G-T	not reported	0	1	0	0	GCTGTAG	5p	1	1.99298	1	2.20154	0.000179147	0.395557	0.000179147	0.329989	[B/AA (T)]
let-7b-5p__let-7b__0__-3__2MT16M	hsa-let-7b	MI0000063	hsa-let-7b-5p	MIMAT0000063	0	-3	46113691	46113709	chr22	+	1	TGTGGTAGTAGGTTGTGTG	TGAGGTAGTAGGTTGTGTG	not reported	3:A-T	not reported	1	0	0	0	GTGGTAG	5p	1.72155	1.21342	2.33166	1.1527	0.403798	0.076675	0.257255	0.0919025	[B/AA (N)]
let-7b-5p__let-7b__0__-3__3MT15M	hsa-let-7b	MI0000063	hsa-let-7b-5p	MIMAT0000063	0	-3	46113691	46113709	chr22	+	1	TGATGTAGTAGGTTGTGTG	TGAGGTAGTAGGTTGTGTG	not reported	4:G-T	not reported	0	1	0	1	GATGTAG	5p	1.88133	3.33783	1.20226	2.3248	0.121104	0.432461	0.310462	0.598173	[W (T)] and [B/AA (T)]
let-7b-5p__let-7b__0__-3__6MC12M	hsa-let-7b	MI0000063	hsa-let-7b-5p	MIMAT0000063	0	-3	46113691	46113709	chr22	+	1	TGAGGTCGTAGGTTGTGTG	TGAGGTAGTAGGTTGTGTG	not reported	7:A-C	not reported	0	0	1	0	GAGGTCG	5p	2.03575	1.04607	1.20835	1.02111	0.122537	0.0068076	0.364923	0.010928	[W (N)]
let-7b-5p__let-7b__0__-3__9MC9M	hsa-let-7b	MI0000063	hsa-let-7b-5p	MIMAT0000063	0	-3	46113691	46113709	chr22	+	1	TGAGGTAGTCGGTTGTGTG	TGAGGTAGTAGGTTGTGTG	not reported	10:A-C	not reported	0	0	1	0	GAGGTAG	5p	2.1192	1.04038	1	1.04707	0.000179147	0.018273	0.399857	0.00913651	[W (N)]
let-7b-5p__let-7b__0__-4__18M	hsa-let-7b	MI0000063	hsa-let-7b-5p	MIMAT0000063	0	-4	46113691	46113708	chr22	+	0	TGAGGTAGTAGGTTGTGT	TGAGGTAGTAGGTTGTGT	not reported	not reported	not reported	1	1	1	1	GAGGTAG	5p	137.03	60.278	128.877	54.5396	0.951989	0.923146	0.958975	0.928341	[W (N)] and [W (T)] and [B/AA (N)] and [B/AA (T)]
let-7b-5p__let-7b__0__-4__2MC13MA1M	hsa-let-7b	MI0000063	hsa-let-7b-5p	MIMAT0000063	0	-4	46113691	46113708	chr22	+	2	TGCGGTAGTAGGTTGTAT	TGAGGTAGTAGGTTGTGT	COSV100659519,TCGA,rs1363782548=17:G-A	3:A-C	not reported	0	1	0	1	GCGGTAG	5p	1.01818	2.00921	1	2.17555	0.000179147	0.385525	0.036546	0.337693	[W (T)] and [B/AA (T)]
let-7b-5p__let-7b__0__-5__17M	hsa-let-7b	MI0000063	hsa-let-7b-5p	MIMAT0000063	0	-5	46113691	46113707	chr22	+	0	TGAGGTAGTAGGTTGTG	TGAGGTAGTAGGTTGTG	not reported	not reported	not reported	1	1	1	1	GAGGTAG	5p	297.412	211.585	363.779	234.962	0.971516	0.965066	0.973845	0.963991	[W (N)] and [W (T)] and [B/AA (N)] and [B/AA (T)]
let-7b-5p__let-7b__0__-6__2MC13M	hsa-let-7b	MI0000063	hsa-let-7b-5p	MIMAT0000063	0	-6	46113691	46113706	chr22	+	1	TGCGGTAGTAGGTTGT	TGAGGTAGTAGGTTGT	not reported	3:A-C	not reported	0	1	0	1	GCGGTAG	5p	1.03849	2.45315	1.04368	2.30755	0.0725546	0.427625	0.0480115	0.473486	[W (T)] and [B/AA (T)]
let-7b-5p__let-7b__0__+1__22MA	hsa-let-7b	MI0000063	hsa-let-7b-5p	MIMAT0000063	0	1	46113691	46113713	chr22	+	1	TGAGGTAGTAGGTTGTGTGGTTA	TGAGGTAGTAGGTTGTGTGGTTT	COSV100659385,TCGA=23:T-A	not reported	not reported	1	1	1	1	GAGGTAG	5p	514.748	324.825	430.851	324.667	0.976353	0.972232	0.98119	0.972949	[W (N)] and [W (T)] and [B/AA (N)] and [B/AA (T)]
let-7b-5p__let-7b__0__+1__23M	hsa-let-7b	MI0000063	hsa-let-7b-5p	MIMAT0000063	0	1	46113691	46113713	chr22	+	0	TGAGGTAGTAGGTTGTGTGGTTT	TGAGGTAGTAGGTTGTGTGGTTT	not reported	not reported	not reported	1	1	1	1	GAGGTAG	5p	448.614	393.2	372.032	434.251	0.97259	0.976353	0.979398	0.976173	[W (N)] and [W (T)] and [B/AA (N)] and [B/AA (T)]
let-7b-5p__let-7b__0__+1__2MC19MA	hsa-let-7b	MI0000063	hsa-let-7b-5p	MIMAT0000063	0	1	46113691	46113713	chr22	+	2	TGCGGTAGTAGGTTGTGTGGTTA	TGAGGTAGTAGGTTGTGTGGTTT	COSV100659385,TCGA=23:T-A	3:A-C	not reported	0	1	0	1	GCGGTAG	5p	1.05317	2.46061	1.03577	2.87951	0.063239	0.538338	0.0548191	0.47474	[W (T)] and [B/AA (T)]
let-7b-5p__let-7b__0__+1__2MC20M	hsa-let-7b	MI0000063	hsa-let-7b-5p	MIMAT0000063	0	1	46113691	46113713	chr22	+	1	TGCGGTAGTAGGTTGTGTGGTTT	TGAGGTAGTAGGTTGTGTGGTTT	not reported	3:A-C	not reported	0	1	0	1	GCGGTAG	5p	1.05706	2.59142	1	3.25118	0.000179147	0.58402	0.0558939	0.499642	[W (T)] and [B/AA (T)]
let-7b-5p__let-7b__0__+1__2MCT18MA	hsa-let-7b	MI0000063	hsa-let-7b-5p	MIMAT0000063	0	1	46113691	46113713	chr22	+	3	TGCTGTAGTAGGTTGTGTGGTTA	TGAGGTAGTAGGTTGTGTGGTTT	COSV100659385,TCGA=23:T-A	3:A-C;4:G-T	not reported	0	1	0	1	GCTGTAG	5p	1.02304	2.1518	1	2.34565	0.000179147	0.438373	0.0385167	0.389108	[W (T)] and [B/AA (T)]
let-7b-5p__let-7b__0__+1__2MCT19M	hsa-let-7b	MI0000063	hsa-let-7b-5p	MIMAT0000063	0	1	46113691	46113713	chr22	+	2	TGCTGTAGTAGGTTGTGTGGTTT	TGAGGTAGTAGGTTGTGTGGTTT	not reported	3:A-C;4:G-T	not reported	0	1	0	1	GCTGTAG	5p	1.02304	2.28715	1	2.80963	0.000179147	0.530455	0.0385167	0.427087	[W (T)] and [B/AA (T)]
let-7b-5p__let-7b__0__+1__3MT18MA	hsa-let-7b	MI0000063	hsa-let-7b-5p	MIMAT0000063	0	1	46113691	46113713	chr22	+	2	TGATGTAGTAGGTTGTGTGGTTA	TGAGGTAGTAGGTTGTGTGGTTT	COSV100659385,TCGA=23:T-A	4:G-T	not reported	0	1	1	1	GATGTAG	5p	2.01658	3.38427	1.019	2.35359	0.0551774	0.440344	0.357936	0.602114	[W (N)] and [W (T)] and [B/AA (T)]
let-7b-5p__let-7b__0__+1__3MT19M	hsa-let-7b	MI0000063	hsa-let-7b-5p	MIMAT0000063	0	1	46113691	46113713	chr22	+	1	TGATGTAGTAGGTTGTGTGGTTT	TGAGGTAGTAGGTTGTGTGGTTT	not reported	4:G-T	not reported	0	1	0	1	GATGTAG	5p	1.96238	3.76806	1.03413	2.76523	0.0600143	0.523468	0.341813	0.634719	[W (T)] and [B/AA (T)]
let-7b-5p__let-7b__0__+1__6MC15MA	hsa-let-7b	MI0000063	hsa-let-7b-5p	MIMAT0000063	0	1	46113691	46113713	chr22	+	2	TGAGGTCGTAGGTTGTGTGGTTA	TGAGGTAGTAGGTTGTGTGGTTT	COSV100659385,TCGA=23:T-A	7:A-C	not reported	0	0	1	0	GAGGTCG	5p	2.11623	1.03925	1.31687	1.02151	0.148692	0.00698674	0.398603	0.00877822	[W (N)]
let-7b-5p__let-7b__0__+1__6MC16M	hsa-let-7b	MI0000063	hsa-let-7b-5p	MIMAT0000063	0	1	46113691	46113713	chr22	+	1	TGAGGTCGTAGGTTGTGTGGTTT	TGAGGTAGTAGGTTGTGTGGTTT	not reported	7:A-C	not reported	0	0	1	0	GAGGTCG	5p	2.10911	1.04304	1.11669	1.01208	0.0947689	0.00376209	0.394661	0.0102114	[W (N)]
let-7b-5p__let-7b__0__+1__9MC12MA	hsa-let-7b	MI0000063	hsa-let-7b-5p	MIMAT0000063	0	1	46113691	46113713	chr22	+	2	TGAGGTAGTCGGTTGTGTGGTTA	TGAGGTAGTAGGTTGTGTGGTTT	COSV100659385,TCGA=23:T-A	10:A-C	not reported	0	0	1	0	GAGGTAG	5p	2.33083	1.00954	1	1.03163	0.000179147	0.0107488	0.458617	0.00143318	[W (N)]
let-7b-5p__let-7b__0__+1__9MC13M	hsa-let-7b	MI0000063	hsa-let-7b-5p	MIMAT0000063	0	1	46113691	46113713	chr22	+	1	TGAGGTAGTCGGTTGTGTGGTTT	TGAGGTAGTAGGTTGTGTGGTTT	not reported	10:A-C	not reported	0	0	1	0	GAGGTAG	5p	2.41247	1.01649	1	1.00647	0.000179147	0.0030455	0.479756	0.0030455	[W (N)]
let-7b-5p__let-7b__0__0__14MC7M	hsa-let-7b	MI0000063	hsa-let-7b-5p	MIMAT0000063	0	0	46113691	46113712	chr22	+	1	TGAGGTAGTAGGTTCTGTGGTT	TGAGGTAGTAGGTTGTGTGGTT	not reported	15:G-C	not reported	1	0	1	0	GAGGTAG	5p	2.8409	1.62056	2.6876	1.60353	0.480115	0.229129	0.554102	0.231996	[W (N)] and [B/AA (N)]
let-7b-5p__let-7b__0__0__14MT7M	hsa-let-7b	MI0000063	hsa-let-7b-5p	MIMAT0000063	0	0	46113691	46113712	chr22	+	1	TGAGGTAGTAGGTTTTGTGGTT	TGAGGTAGTAGGTTGTGTGGTT	not reported	15:G-T	not reported	1	0	1	0	GAGGTAG	5p	2.35963	1.39852	2.09434	1.34085	0.33393	0.158545	0.465066	0.164099	[W (N)] and [B/AA (N)]
let-7b-5p__let-7b__0__0__18MA3M	hsa-let-7b	MI0000063	hsa-let-7b-5p	MIMAT0000063	0	0	46113691	46113712	chr22	+	1	TGAGGTAGTAGGTTGTGTAGTT	TGAGGTAGTAGGTTGTGTGGTT	rs1209727973=19:G-A	not reported	not reported	1	1	1	1	GAGGTAG	5p	7.53451	3.24411	9.23572	2.82287	0.779111	0.532067	0.78359	0.588857	[W (N)] and [W (T)] and [B/AA (N)] and [B/AA (T)]
let-7b-5p__let-7b__0__0__19MT2M	hsa-let-7b	MI0000063	hsa-let-7b-5p	MIMAT0000063	0	0	46113691	46113712	chr22	+	1	TGAGGTAGTAGGTTGTGTGTTT	TGAGGTAGTAGGTTGTGTGGTT	not reported	20:G-T	not reported	1	0	1	0	GAGGTAG	5p	2.57358	1.57991	2.28931	1.4799	0.393407	0.202974	0.512003	0.220709	[W (N)] and [B/AA (N)]
let-7b-5p__let-7b__0__0__1MT20M	hsa-let-7b	MI0000063	hsa-let-7b-5p	MIMAT0000063	0	0	46113691	46113712	chr22	+	1	TTAGGTAGTAGGTTGTGTGGTT	TGAGGTAGTAGGTTGTGTGGTT	not reported	2:G-T	not reported	1	1	1	1	TAGGTAG	5p	3.79223	3.18886	3.03306	2.76351	0.534575	0.52311	0.654425	0.583124	[W (N)] and [W (T)] and [B/AA (N)] and [B/AA (T)]
let-7b-5p__let-7b__0__0__20MG1M	hsa-let-7b	MI0000063	hsa-let-7b-5p	MIMAT0000063	0	0	46113691	46113712	chr22	+	1	TGAGGTAGTAGGTTGTGTGGGT	TGAGGTAGTAGGTTGTGTGGTT	COSV100659503,TCGA=21:T-G	not reported	not reported	1	0	1	0	GAGGTAG	5p	2.42802	1.59579	2.58256	1.31868	0.462558	0.1512	0.484772	0.224292	[W (N)] and [B/AA (N)]
let-7b-5p__let-7b__0__0__22M	hsa-let-7b	MI0000063	hsa-let-7b-5p	MIMAT0000063	0	0	46113691	46113712	chr22	+	0	TGAGGTAGTAGGTTGTGTGGTT	TGAGGTAGTAGGTTGTGTGGTT	not reported	not reported	not reported	1	1	1	1	GAGGTAG	5p	4349.3	2961.38	4019.77	2875.55	0.994446	0.994267	0.995163	0.994446	[W (N)] and [W (T)] and [B/AA (N)] and [B/AA (T)]
let-7b-5p__let-7b__0__0__2MC19M	hsa-let-7b	MI0000063	hsa-let-7b-5p	MIMAT0000063	0	0	46113691	46113712	chr22	+	1	TGCGGTAGTAGGTTGTGTGGTT	TGAGGTAGTAGGTTGTGTGGTT	not reported	3:A-C	not reported	0	1	0	1	GCGGTAG	5p	1.19451	6.67241	1.019	9.85778	0.0551774	0.79631	0.098531	0.752418	[W (T)] and [B/AA (T)]
let-7b-5p__let-7b__0__0__2MCT18M	hsa-let-7b	MI0000063	hsa-let-7b-5p	MIMAT0000063	0	0	46113691	46113712	chr22	+	2	TGCTGTAGTAGGTTGTGTGGTT	TGAGGTAGTAGGTTGTGTGGTT	not reported	3:A-C;4:G-T	not reported	0	1	0	1	GCTGTAG	5p	1.13115	4.90667	1	7.45685	0.000179147	0.763346	0.080258	0.69742	[W (T)] and [B/AA (T)]
let-7b-5p__let-7b__0__0__2MG19M	hsa-let-7b	MI0000063	hsa-let-7b-5p	MIMAT0000063	0	0	46113691	46113712	chr22	+	1	TGGGGTAGTAGGTTGTGTGGTT	TGAGGTAGTAGGTTGTGTGGTT	TCGA=3:A-G	not reported	not reported	1	0	1	0	GGGGTAG	5p	2.73707	1.49812	2.15332	1.47722	0.354712	0.20172	0.540846	0.19545	[W (N)] and [B/AA (N)]
let-7b-5p__let-7b__0__0__2MT19M	hsa-let-7b	MI0000063	hsa-let-7b-5p	MIMAT0000063	0	0	46113691	46113712	chr22	+	1	TGTGGTAGTAGGTTGTGTGGTT	TGAGGTAGTAGGTTGTGTGGTT	not reported	3:A-T	not reported	1	0	1	0	GTGGTAG	5p	4.16408	1.7043	6.77444	1.41607	0.73737	0.18488	0.68058	0.253135	[W (N)] and [B/AA (N)]
let-7b-5p__let-7b__0__0__3MT18M	hsa-let-7b	MI0000063	hsa-let-7b-5p	MIMAT0000063	0	0	46113691	46113712	chr22	+	1	TGATGTAGTAGGTTGTGTGGTT	TGAGGTAGTAGGTTGTGTGGTT	not reported	4:G-T	not reported	0	1	1	1	GATGTAG	5p	3.6584	11.0061	1.4629	8.49886	0.185776	0.777141	0.645826	0.814941	[W (N)] and [W (T)] and [B/AA (T)]
let-7b-5p__let-7b__0__0__5MG16M	hsa-let-7b	MI0000063	hsa-let-7b-5p	MIMAT0000063	0	0	46113691	46113712	chr22	+	1	TGAGGGAGTAGGTTGTGTGGTT	TGAGGTAGTAGGTTGTGTGGTT	not reported	6:T-G	not reported	1	0	1	0	GAGGGAG	5p	2.16182	1.54374	3.06423	1.49828	0.538696	0.206736	0.414009	0.208707	[W (N)] and [B/AA (N)]
let-7b-5p__let-7b__0__0__6MC15M	hsa-let-7b	MI0000063	hsa-let-7b-5p	MIMAT0000063	0	0	46113691	46113712	chr22	+	1	TGAGGTCGTAGGTTGTGTGGTT	TGAGGTAGTAGGTTGTGTGGTT	not reported	7:A-C	not reported	0	0	1	0	GAGGTCG	5p	4.06526	1.13939	1.71462	1.07902	0.236654	0.0361877	0.672698	0.0521319	[W (N)]
let-7b-5p__let-7b__0__0__6MC2MC12M	hsa-let-7b	MI0000063	hsa-let-7b-5p	MIMAT0000063	0	0	46113691	46113712	chr22	+	2	TGAGGTCGTCGGTTGTGTGGTT	TGAGGTAGTAGGTTGTGTGGTT	not reported	7:A-C;10:A-C	not reported	0	0	1	0	GAGGTCG	5p	2.52075	1.01192	1.07977	1.00553	0.0838409	0.00179147	0.502329	0.00179147	[W (N)]
let-7b-5p__let-7b__0__0__6MG15M	hsa-let-7b	MI0000063	hsa-let-7b-5p	MIMAT0000063	0	0	46113691	46113712	chr22	+	1	TGAGGTGGTAGGTTGTGTGGTT	TGAGGTAGTAGGTTGTGTGGTT	not reported	7:A-G	not reported	1	0	1	0	GAGGTGG	5p	3.09852	1.8498	2.49393	1.80273	0.443031	0.279649	0.586886	0.288785	[W (N)] and [B/AA (N)]
let-7b-5p__let-7b__0__0__9MC12M	hsa-let-7b	MI0000063	hsa-let-7b-5p	MIMAT0000063	0	0	46113691	46113712	chr22	+	1	TGAGGTAGTCGGTTGTGTGGTT	TGAGGTAGTAGGTTGTGTGGTT	not reported	10:A-C	not reported	0	0	1	0	GAGGTAG	5p	3.52454	1.11299	1.19226	1.07381	0.118416	0.0329631	0.634002	0.038875	[W (N)]
let-7b-5p__let-7b__0__0__9MG12M	hsa-let-7b	MI0000063	hsa-let-7b-5p	MIMAT0000063	0	0	46113691	46113712	chr22	+	1	TGAGGTAGTGGGTTGTGTGGTT	TGAGGTAGTAGGTTGTGTGGTT	not reported	10:A-G	not reported	1	0	1	0	GAGGTAG	5p	2.4115	1.68699	2.46229	1.67379	0.435149	0.246865	0.479577	0.248477	[W (N)] and [B/AA (N)]
let-7c-3p__let-7c__0__-1__21M	hsa-let-7c	MI0000064	hsa-let-7c-3p	MIMAT0026472	0	-1	16539883	16539903	chr21	+	0	CTGTACAACCTTCTAGCTTTC	CTGTACAACCTTCTAGCTTTC	not reported	not reported	not reported	0	1	0	1	TGTACAA	3p	1.54359	2.31301	1.2917	2.41236	0.141885	0.453601	0.197958	0.432461	[W (T)] and [B/AA (T)]
let-7c-3p__let-7c__0__0__22M	hsa-let-7c	MI0000064	hsa-let-7c-3p	MIMAT0026472	0	0	16539883	16539904	chr21	+	0	CTGTACAACCTTCTAGCTTTCC	CTGTACAACCTTCTAGCTTTCC	not reported	not reported	not reported	1	1	1	1	TGTACAA	3p	2.55392	4.39152	2.43893	4.27372	0.428879	0.660337	0.508241	0.669473	[W (N)] and [W (T)] and [B/AA (N)] and [B/AA (T)]
let-7c-5p__let-7c__-1__-1__22M	hsa-let-7c	MI0000064	hsa-let-7c-5p	MIMAT0000064	-1	-1	16539837	16539858	chr21	+	0	TTGAGGTAGTAGGTTGTATGGT	TTGAGGTAGTAGGTTGTATGGT	not reported	not reported	not reported	1	1	1	1	TGAGGTA	5p	6.2282	3.4727	4.92164	3.60332	0.675564	0.614296	0.756897	0.61143	[W (N)] and [W (T)] and [B/AA (N)] and [B/AA (T)]
let-7c-5p__let-7c__-1__-2__21M	hsa-let-7c	MI0000064	hsa-let-7c-5p	MIMAT0000064	-1	-2	16539837	16539857	chr21	+	0	TTGAGGTAGTAGGTTGTATGG	TTGAGGTAGTAGGTTGTATGG	not reported	not reported	not reported	1	1	1	1	TGAGGTA	5p	9.627	4.41652	7.20087	4.68201	0.747044	0.675385	0.817449	0.671265	[W (N)] and [W (T)] and [B/AA (N)] and [B/AA (T)]
let-7c-5p__let-7c__-1__-3__20M	hsa-let-7c	MI0000064	hsa-let-7c-5p	MIMAT0000064	-1	-3	16539837	16539856	chr21	+	0	TTGAGGTAGTAGGTTGTATG	TTGAGGTAGTAGGTTGTATG	not reported	not reported	not reported	1	0	1	0	TGAGGTA	5p	3.23751	1.84508	2.2347	1.86429	0.379434	0.293622	0.604443	0.288248	[W (N)] and [B/AA (N)]
let-7c-5p__let-7c__-1__0__23M	hsa-let-7c	MI0000064	hsa-let-7c-5p	MIMAT0000064	-1	0	16539837	16539859	chr21	+	0	TTGAGGTAGTAGGTTGTATGGTT	TTGAGGTAGTAGGTTGTATGGTT	not reported	not reported	not reported	1	1	1	1	TGAGGTA	5p	3.73532	2.66752	3.44125	2.67999	0.581691	0.508241	0.650305	0.51057	[W (N)] and [W (T)] and [B/AA (N)] and [B/AA (T)]
let-7c-5p__let-7c__+1__0__21M	hsa-let-7c	MI0000064	hsa-let-7c-5p	MIMAT0000064	1	0	16539839	16539859	chr21	+	0	GAGGTAGTAGGTTGTATGGTT	GAGGTAGTAGGTTGTATGGTT	not reported	not reported	not reported	0	0	1	0	AGGTAGT	5p	2.01042	1.50853	1.93119	1.39105	0.27947	0.176102	0.356682	0.199391	[W (N)]
let-7c-5p__let-7c__0__-1__16MT4M	hsa-let-7c	MI0000064	hsa-let-7c-5p	MIMAT0000064	0	-1	16539838	16539858	chr21	+	1	TGAGGTAGTAGGTTGTTTGGT	TGAGGTAGTAGGTTGTATGGT	not reported	17:A-T	not reported	0	0	1	0	GAGGTAG	5p	2.76606	1.28594	1.90407	1.2118	0.27517	0.10713	0.544608	0.121283	[W (N)]
let-7c-5p__let-7c__0__-1__18MC2M	hsa-let-7c	MI0000064	hsa-let-7c-5p	MIMAT0000064	0	-1	16539838	16539858	chr21	+	1	TGAGGTAGTAGGTTGTATCGT	TGAGGTAGTAGGTTGTATGGT	not reported	19:G-C	not reported	0	1	0	1	GAGGTAG	5p	1.89307	3.73152	1.36945	7.20837	0.161053	0.757255	0.314045	0.632927	[W (T)] and [B/AA (T)]
let-7c-5p__let-7c__0__-1__21M	hsa-let-7c	MI0000064	hsa-let-7c-5p	MIMAT0000064	0	-1	16539838	16539858	chr21	+	0	TGAGGTAGTAGGTTGTATGGT	TGAGGTAGTAGGTTGTATGGT	not reported	not reported	not reported	1	1	1	1	GAGGTAG	5p	513.391	135.065	480.267	129.22	0.978144	0.94966	0.98101	0.952168	[W (N)] and [W (T)] and [B/AA (N)] and [B/AA (T)]
let-7c-5p__let-7c__0__-1__3MT17M	hsa-let-7c	MI0000064	hsa-let-7c-5p	MIMAT0000064	0	-1	16539838	16539858	chr21	+	1	TGATGTAGTAGGTTGTATGGT	TGAGGTAGTAGGTTGTATGGT	not reported	4:G-T	not reported	0	0	0	1	GATGTAG	5p	1.57776	2.06486	1.14468	1.51755	0.105518	0.211394	0.209423	0.357399	[W (T)]
let-7c-5p__let-7c__0__-2__20M	hsa-let-7c	MI0000064	hsa-let-7c-5p	MIMAT0000064	0	-2	16539838	16539857	chr21	+	0	TGAGGTAGTAGGTTGTATGG	TGAGGTAGTAGGTTGTATGG	not reported	not reported	not reported	1	1	1	1	GAGGTAG	5p	675.512	168.052	612.865	160.777	0.980115	0.955213	0.984056	0.956826	[W (N)] and [W (T)] and [B/AA (N)] and [B/AA (T)]
let-7c-5p__let-7c__0__-3__19M	hsa-let-7c	MI0000064	hsa-let-7c-5p	MIMAT0000064	0	-3	16539838	16539856	chr21	+	0	TGAGGTAGTAGGTTGTATG	TGAGGTAGTAGGTTGTATG	not reported	not reported	not reported	1	1	1	1	GAGGTAG	5p	193.91	52.0911	169.704	46.0911	0.957542	0.915084	0.964887	0.920996	[W (N)] and [W (T)] and [B/AA (N)] and [B/AA (T)]
let-7c-5p__let-7c__0__-4__14MA3M	hsa-let-7c	MI0000064	hsa-let-7c-5p	MIMAT0000064	0	-4	16539838	16539855	chr21	+	1	TGAGGTAGTAGGTTATAT	TGAGGTAGTAGGTTGTAT	not reported	15:G-A	not reported	1	0	1	1	GAGGTAG	5p	3.07442	2.05079	2.53388	1.88151	0.453422	0.297564	0.584558	0.353995	[W (N)] and [W (T)] and [B/AA (N)]
let-7c-5p__let-7c__0__-4__18M	hsa-let-7c	MI0000064	hsa-let-7c-5p	MIMAT0000064	0	-4	16539838	16539855	chr21	+	0	TGAGGTAGTAGGTTGTAT	TGAGGTAGTAGGTTGTAT	not reported	not reported	not reported	1	1	1	1	GAGGTAG	5p	848.655	397.484	1013.62	556.746	0.986027	0.979577	0.986206	0.977069	[W (N)] and [W (T)] and [B/AA (N)] and [B/AA (T)]
let-7c-5p__let-7c__0__-4__3MT14M	hsa-let-7c	MI0000064	hsa-let-7c-5p	MIMAT0000064	0	-4	16539838	16539855	chr21	+	1	TGATGTAGTAGGTTGTAT	TGAGGTAGTAGGTTGTAT	not reported	4:G-T	not reported	0	0	0	1	GATGTAG	5p	1.55878	2.33583	1.05378	1.91877	0.0745253	0.307417	0.202257	0.440702	[W (T)]
let-7c-5p__let-7c__0__-5__17M	hsa-let-7c	MI0000064	hsa-let-7c-5p	MIMAT0000064	0	-5	16539838	16539854	chr21	+	0	TGAGGTAGTAGGTTGTA	TGAGGTAGTAGGTTGTA	not reported	not reported	not reported	1	1	1	1	GAGGTAG	5p	157.611	59.327	201.859	74.0845	0.962021	0.933357	0.960767	0.927445	[W (N)] and [W (T)] and [B/AA (N)] and [B/AA (T)]
let-7c-5p__let-7c__0__-5__2MC13MG	hsa-let-7c	MI0000064	hsa-let-7c-5p	MIMAT0000064	0	-5	16539838	16539854	chr21	+	2	TGCGGTAGTAGGTTGTG	TGAGGTAGTAGGTTGTA	not reported	3:A-C	22327324,27229138,29165639=17:A-G	0	1	0	0	GCGGTAG	5p	1.04015	1.91014	1	2.08559	0.000179147	0.355607	0.0485489	0.308133	[B/AA (T)]
let-7c-5p__let-7c__0__-6__6MC9M	hsa-let-7c	MI0000064	hsa-let-7c-5p	MIMAT0000064	0	-6	16539838	16539853	chr21	+	1	TGAGGTCGTAGGTTGT	TGAGGTAGTAGGTTGT	not reported	7:A-C	not reported	1	0	1	0	GAGGTCG	5p	4.39642	1.04448	2.05754	1.04922	0.31924	0.0191688	0.692404	0.0105697	[W (N)] and [B/AA (N)]
let-7c-5p__let-7c__0__-6__9MC6M	hsa-let-7c	MI0000064	hsa-let-7c-5p	MIMAT0000064	0	-6	16539838	16539853	chr21	+	1	TGAGGTAGTCGGTTGT	TGAGGTAGTAGGTTGT	not reported	10:A-C	not reported	1	0	1	0	GAGGTAG	5p	4.05352	1.14665	2.25303	1.17582	0.384271	0.0892153	0.671623	0.0555357	[W (N)] and [B/AA (N)]
let-7c-5p__let-7c__0__+1__23M	hsa-let-7c	MI0000064	hsa-let-7c-5p	MIMAT0000064	0	1	16539838	16539860	chr21	+	0	TGAGGTAGTAGGTTGTATGGTTT	TGAGGTAGTAGGTTGTATGGTTT	not reported	not reported	not reported	1	1	1	1	GAGGTAG	5p	28.2095	14.8673	25.3214	16.4155	0.876209	0.848262	0.899857	0.841992	[W (N)] and [W (T)] and [B/AA (N)] and [B/AA (T)]
let-7c-5p__let-7c__0__0__16MT5M	hsa-let-7c	MI0000064	hsa-let-7c-5p	MIMAT0000064	0	0	16539838	16539859	chr21	+	1	TGAGGTAGTAGGTTGTTTGGTT	TGAGGTAGTAGGTTGTATGGTT	not reported	17:A-T	not reported	1	0	1	0	GAGGTAG	5p	3.64154	1.59113	2.30489	1.31033	0.398424	0.147976	0.643676	0.223755	[W (N)] and [B/AA (N)]
let-7c-5p__let-7c__0__0__18MC3M	hsa-let-7c	MI0000064	hsa-let-7c-5p	MIMAT0000064	0	0	16539838	16539859	chr21	+	1	TGAGGTAGTAGGTTGTATCGTT	TGAGGTAGTAGGTTGTATGGTT	not reported	19:G-C	not reported	0	1	1	1	GAGGTAG	5p	2.22554	5.55565	1.72825	12.2167	0.239699	0.819599	0.434074	0.72053	[W (N)] and [W (T)] and [B/AA (T)]
let-7c-5p__let-7c__0__0__22M	hsa-let-7c	MI0000064	hsa-let-7c-5p	MIMAT0000064	0	0	16539838	16539859	chr21	+	0	TGAGGTAGTAGGTTGTATGGTT	TGAGGTAGTAGGTTGTATGGTT	not reported	not reported	not reported	1	1	1	1	GAGGTAG	5p	1428.78	439.634	1342.4	442.969	0.988893	0.977069	0.991222	0.977607	[W (N)] and [W (T)] and [B/AA (N)] and [B/AA (T)]
let-7c-5p__let-7c__0__0__2MC19M	hsa-let-7c	MI0000064	hsa-let-7c-5p	MIMAT0000064	0	0	16539838	16539859	chr21	+	1	TGCGGTAGTAGGTTGTATGGTT	TGAGGTAGTAGGTTGTATGGTT	not reported	3:A-C	not reported	0	1	0	1	GCGGTAG	5p	1.04015	2.52849	1.03717	3.22601	0.0698674	0.581333	0.0485489	0.489968	[W (T)] and [B/AA (T)]
let-7c-5p__let-7c__0__0__2MCT18M	hsa-let-7c	MI0000064	hsa-let-7c-5p	MIMAT0000064	0	0	16539838	16539859	chr21	+	2	TGCTGTAGTAGGTTGTATGGTT	TGAGGTAGTAGGTTGTATGGTT	not reported	3:A-C;4:G-T	not reported	0	1	0	1	GCTGTAG	5p	1	2.15203	1	2.71227	0.000179147	0.514153	0.000179147	0.389466	[W (T)] and [B/AA (T)]
let-7c-5p__let-7c__0__0__2MT19M	hsa-let-7c	MI0000064	hsa-let-7c-5p	MIMAT0000064	0	0	16539838	16539859	chr21	+	1	TGTGGTAGTAGGTTGTATGGTT	TGAGGTAGTAGGTTGTATGGTT	not reported	3:A-T	not reported	1	0	1	0	GTGGTAG	5p	2.11268	1.16371	3.13458	1.12864	0.545683	0.0634181	0.396811	0.0655679	[W (N)] and [B/AA (N)]
let-7c-5p__let-7c__0__0__3MT18M	hsa-let-7c	MI0000064	hsa-let-7c-5p	MIMAT0000064	0	0	16539838	16539859	chr21	+	1	TGATGTAGTAGGTTGTATGGTT	TGAGGTAGTAGGTTGTATGGTT	not reported	4:G-T	not reported	0	1	1	1	GATGTAG	5p	2.03778	3.64775	1.12878	2.60944	0.099785	0.495342	0.365819	0.625941	[W (N)] and [W (T)] and [B/AA (T)]
let-7c-5p__let-7c__0__0__6MC15M	hsa-let-7c	MI0000064	hsa-let-7c-5p	MIMAT0000064	0	0	16539838	16539859	chr21	+	1	TGAGGTCGTAGGTTGTATGGTT	TGAGGTAGTAGGTTGTATGGTT	not reported	7:A-C	not reported	0	0	1	0	GAGGTCG	5p	2.38225	1.03481	1.33022	1.01721	0.152633	0.00573271	0.470978	0.00698674	[W (N)]
let-7c-5p__let-7c__0__0__9MC12M	hsa-let-7c	MI0000064	hsa-let-7c-5p	MIMAT0000064	0	0	16539838	16539859	chr21	+	1	TGAGGTAGTCGGTTGTATGGTT	TGAGGTAGTAGGTTGTATGGTT	not reported	10:A-C	not reported	0	0	1	0	GAGGTAG	5p	2.3183	1.01449	1.03413	1.01537	0.0600143	0.00465783	0.45593	0.00232891	[W (N)]
let-7d-3p__let-7d__+1__-1__20M	hsa-let-7d	MI0000065	hsa-let-7d-3p	MIMAT0004484	1	-1	94178896	94178915	chr9	+	0	TATACGACCTGCTGCCTTTC	TATACGACCTGCTGCCTTTC	not reported	not reported	not reported	1	1	1	1	ATACGAC	3p	6.83631	4.31754	4.066	4.24415	0.626657	0.658187	0.769258	0.665532	[W (N)] and [W (T)] and [B/AA (N)] and [B/AA (T)]
let-7d-3p__let-7d__+1__-2__19M	hsa-let-7d	MI0000065	hsa-let-7d-3p	MIMAT0004484	1	-2	94178896	94178914	chr9	+	0	TATACGACCTGCTGCCTTT	TATACGACCTGCTGCCTTT	not reported	not reported	not reported	1	1	1	1	ATACGAC	3p	4.3385	2.8523	2.5987	2.75666	0.465066	0.521319	0.689538	0.542995	[W (N)] and [W (T)] and [B/AA (N)] and [B/AA (T)]
let-7d-3p__let-7d__+1__0__21M	hsa-let-7d	MI0000065	hsa-let-7d-3p	MIMAT0004484	1	0	94178896	94178916	chr9	+	0	TATACGACCTGCTGCCTTTCT	TATACGACCTGCTGCCTTTCT	not reported	not reported	not reported	1	1	1	1	ATACGAC	3p	18.6739	11.1481	11.556	11.4468	0.805984	0.813329	0.876568	0.816732	[W (N)] and [W (T)] and [B/AA (N)] and [B/AA (T)]
let-7d-3p__let-7d__0__-1__21M	hsa-let-7d	MI0000065	hsa-let-7d-3p	MIMAT0004484	0	-1	94178895	94178915	chr9	+	0	CTATACGACCTGCTGCCTTTC	CTATACGACCTGCTGCCTTTC	not reported	not reported	not reported	1	1	1	1	TATACGA	3p	150.586	73.0942	92.2594	67.7004	0.939269	0.929416	0.96005	0.93479	[W (N)] and [W (T)] and [B/AA (N)] and [B/AA (T)]
let-7d-3p__let-7d__0__-1__2MC18M	hsa-let-7d	MI0000065	hsa-let-7d-3p	MIMAT0004484	0	-1	94178895	94178915	chr9	+	1	CTCTACGACCTGCTGCCTTTC	CTATACGACCTGCTGCCTTTC	not reported	3:A-C	not reported	0	1	0	1	TCTACGA	3p	1.06651	2.13506	1	2.32869	0.000179147	0.434253	0.0603726	0.383196	[W (T)] and [B/AA (T)]
let-7d-3p__let-7d__0__-1__4MG16M	hsa-let-7d	MI0000065	hsa-let-7d-3p	MIMAT0004484	0	-1	94178895	94178915	chr9	+	1	CTATGCGACCTGCTGCCTTTC	CTATACGACCTGCTGCCTTTC	not reported	not reported	22499667,25582055,25692236,27292188,28550310,29165639,29233923,29267965,29950133=5:A-G	0	0	1	0	TATGCGA	3p	3.00423	1.23162	1.86519	1.22544	0.268363	0.113221	0.577033	0.0999642	[W (N)]
let-7d-3p__let-7d__0__-2__20M	hsa-let-7d	MI0000065	hsa-let-7d-3p	MIMAT0004484	0	-2	94178895	94178914	chr9	+	0	CTATACGACCTGCTGCCTTT	CTATACGACCTGCTGCCTTT	not reported	not reported	not reported	1	1	1	1	TATACGA	3p	82.2895	35.7598	51.8075	33.7825	0.915442	0.900573	0.944106	0.90344	[W (N)] and [W (T)] and [B/AA (N)] and [B/AA (T)]
let-7d-3p__let-7d__0__-3__19M	hsa-let-7d	MI0000065	hsa-let-7d-3p	MIMAT0004484	0	-3	94178895	94178913	chr9	+	0	CTATACGACCTGCTGCCTT	CTATACGACCTGCTGCCTT	not reported	not reported	not reported	1	1	1	1	TATACGA	3p	5.02374	2.94692	2.97381	2.65438	0.526514	0.503762	0.717126	0.554998	[W (N)] and [W (T)] and [B/AA (N)] and [B/AA (T)]
let-7d-3p__let-7d__0__-4__18M	hsa-let-7d	MI0000065	hsa-let-7d-3p	MIMAT0004484	0	-4	94178895	94178912	chr9	+	0	CTATACGACCTGCTGCCT	CTATACGACCTGCTGCCT	not reported	not reported	not reported	0	0	1	0	TATACGA	3p	3.46425	1.98126	1.524	1.79986	0.199928	0.278574	0.628986	0.326585	[W (N)]
let-7d-3p__let-7d__0__-5__17M	hsa-let-7d	MI0000065	hsa-let-7d-3p	MIMAT0004484	0	-5	94178895	94178911	chr9	+	0	CTATACGACCTGCTGCC	CTATACGACCTGCTGCC	not reported	not reported	not reported	0	0	1	0	TATACGA	3p	2.09385	1.51278	1.9976	1.55227	0.292189	0.217843	0.38857	0.200645	[W (N)]
let-7d-3p__let-7d__0__-6__16M	hsa-let-7d	MI0000065	hsa-let-7d-3p	MIMAT0004484	0	-6	94178895	94178910	chr9	+	0	CTATACGACCTGCTGC	CTATACGACCTGCTGC	not reported	not reported	not reported	1	0	1	1	TATACGA	3p	3.28585	2.08244	2.23862	1.84519	0.380867	0.289681	0.609459	0.364206	[W (N)] and [W (T)] and [B/AA (N)]
let-7d-3p__let-7d__0__+1__23M	hsa-let-7d	MI0000065	hsa-let-7d-3p	MIMAT0004484	0	1	94178895	94178917	chr9	+	0	CTATACGACCTGCTGCCTTTCTT	CTATACGACCTGCTGCCTTTCTT	not reported	not reported	not reported	0	0	1	0	TATACGA	3p	2.18493	1.33892	1.34567	1.38884	0.156575	0.174848	0.422967	0.144034	[W (N)]
let-7d-3p__let-7d__0__0__21MC	hsa-let-7d	MI0000065	hsa-let-7d-3p	MIMAT0004484	0	0	94178895	94178916	chr9	+	1	CTATACGACCTGCTGCCTTTCC	CTATACGACCTGCTGCCTTTCT	rs1425136128=22:T-C	not reported	not reported	1	1	1	1	TATACGA	3p	5.96668	3.13109	3.98908	2.80464	0.622358	0.529918	0.75009	0.576496	[W (N)] and [W (T)] and [B/AA (N)] and [B/AA (T)]
let-7d-3p__let-7d__0__0__22M	hsa-let-7d	MI0000065	hsa-let-7d-3p	MIMAT0004484	0	0	94178895	94178916	chr9	+	0	CTATACGACCTGCTGCCTTTCT	CTATACGACCTGCTGCCTTTCT	not reported	not reported	not reported	1	1	1	1	TATACGA	3p	285.074	141.445	193.118	140.641	0.961483	0.951809	0.972949	0.952884	[W (N)] and [W (T)] and [B/AA (N)] and [B/AA (T)]
let-7d-3p__let-7d__0__0__2MC19M	hsa-let-7d	MI0000065	hsa-let-7d-3p	MIMAT0004484	0	0	94178895	94178916	chr9	+	1	CTCTACGACCTGCTGCCTTTCT	CTATACGACCTGCTGCCTTTCT	not reported	3:A-C	not reported	0	1	0	1	TCTACGA	3p	1.1372	2.93853	1	3.7853	0.000179147	0.627553	0.0822286	0.554461	[W (T)] and [B/AA (T)]
let-7d-3p__let-7d__0__0__4MG17M	hsa-let-7d	MI0000065	hsa-let-7d-3p	MIMAT0004484	0	0	94178895	94178916	chr9	+	1	CTATGCGACCTGCTGCCTTTCT	CTATACGACCTGCTGCCTTTCT	not reported	not reported	22499667,25582055,25692236,27292188,28550310,29165639,29233923,29267965,29950133=5:A-G	0	0	1	0	TATGCGA	3p	3.16697	1.26526	1.80789	1.25868	0.256001	0.127732	0.596202	0.112504	[W (N)]
let-7d-5p__let-7d__+1__0__21M	hsa-let-7d	MI0000065	hsa-let-7d-5p	MIMAT0000065	1	0	94178842	94178862	chr9	+	0	GAGGTAGTAGGTTGCATAGTT	GAGGTAGTAGGTTGCATAGTT	not reported	not reported	not reported	0	1	0	1	AGGTAGT	5p	1.53661	2.89521	1.20165	2.41932	0.120745	0.455034	0.19545	0.549624	[W (T)] and [B/AA (T)]
let-7d-5p__let-7d__0__-1__21M	hsa-let-7d	MI0000065	hsa-let-7d-5p	MIMAT0000065	0	-1	94178841	94178861	chr9	+	0	AGAGGTAGTAGGTTGCATAGT	AGAGGTAGTAGGTTGCATAGT	not reported	not reported	not reported	1	1	1	1	GAGGTAG	5p	70.9724	43.5253	79.0732	48.1017	0.933716	0.917413	0.939269	0.91383	[W (N)] and [W (T)] and [B/AA (N)] and [B/AA (T)]
let-7d-5p__let-7d__0__-2__20M	hsa-let-7d	MI0000065	hsa-let-7d-5p	MIMAT0000065	0	-2	94178841	94178860	chr9	+	0	AGAGGTAGTAGGTTGCATAG	AGAGGTAGTAGGTTGCATAG	not reported	not reported	not reported	1	1	1	1	GAGGTAG	5p	82.4326	35.7712	89.8704	38.374	0.938194	0.905769	0.944464	0.903619	[W (N)] and [W (T)] and [B/AA (N)] and [B/AA (T)]
let-7d-5p__let-7d__0__-3__19M	hsa-let-7d	MI0000065	hsa-let-7d-5p	MIMAT0000065	0	-3	94178841	94178859	chr9	+	0	AGAGGTAGTAGGTTGCATA	AGAGGTAGTAGGTTGCATA	not reported	not reported	not reported	1	1	1	1	GAGGTAG	5p	2.29651	2.40075	2.92201	2.49319	0.519527	0.470441	0.451809	0.458438	[W (N)] and [W (T)] and [B/AA (N)] and [B/AA (T)]
let-7d-5p__let-7d__0__-4__18M	hsa-let-7d	MI0000065	hsa-let-7d-5p	MIMAT0000065	0	-4	94178841	94178858	chr9	+	0	AGAGGTAGTAGGTTGCAT	AGAGGTAGTAGGTTGCAT	not reported	not reported	not reported	1	1	1	1	GAGGTAG	5p	3.20775	3.89905	3.29186	5.93138	0.563776	0.729308	0.601756	0.643318	[W (N)] and [W (T)] and [B/AA (N)] and [B/AA (T)]
let-7d-5p__let-7d__0__+1__23M	hsa-let-7d	MI0000065	hsa-let-7d-5p	MIMAT0000065	0	1	94178841	94178863	chr9	+	0	AGAGGTAGTAGGTTGCATAGTTT	AGAGGTAGTAGGTTGCATAGTTT	not reported	not reported	not reported	1	1	1	1	GAGGTAG	5p	3.32435	5.0071	2.8368	6.07785	0.505554	0.733071	0.613759	0.700824	[W (N)] and [W (T)] and [B/AA (N)] and [B/AA (T)]
let-7d-5p__let-7d__0__0__22M	hsa-let-7d	MI0000065	hsa-let-7d-5p	MIMAT0000065	0	0	94178841	94178862	chr9	+	0	AGAGGTAGTAGGTTGCATAGTT	AGAGGTAGTAGGTTGCATAGTT	not reported	not reported	not reported	1	1	1	1	GAGGTAG	5p	72.3734	84.4845	75.0097	100.88	0.930849	0.943569	0.940344	0.938732	[W (N)] and [W (T)] and [B/AA (N)] and [B/AA (T)]
let-7e-3p__let-7e__0__-1__21M	hsa-let-7e	MI0000066	hsa-let-7e-3p	MIMAT0004485	0	-1	51692838	51692858	chr19	+	0	CTATACGGCCTCCTAGCTTTC	CTATACGGCCTCCTAGCTTTC	not reported	not reported	not reported	1	1	1	1	TATACGG	3p	5.76063	4.54002	4.84585	4.1049	0.671623	0.648513	0.74364	0.678968	[W (N)] and [W (T)] and [B/AA (N)] and [B/AA (T)]
let-7e-3p__let-7e__0__-2__20M	hsa-let-7e	MI0000066	hsa-let-7e-3p	MIMAT0004485	0	-2	51692838	51692857	chr19	+	0	CTATACGGCCTCCTAGCTTT	CTATACGGCCTCCTAGCTTT	not reported	not reported	not reported	1	1	1	1	TATACGG	3p	2.81523	2.25029	2.16008	2.18061	0.35704	0.387316	0.549982	0.417771	[W (N)] and [W (T)] and [B/AA (N)] and [B/AA (T)]
let-7e-3p__let-7e__0__0__21MT	hsa-let-7e	MI0000066	hsa-let-7e-3p	MIMAT0004485	0	0	51692838	51692859	chr19	+	1	CTATACGGCCTCCTAGCTTTCT	CTATACGGCCTCCTAGCTTTCC	rs755693563=22:C-T	not reported	not reported	1	1	1	1	TATACGG	3p	3.38406	2.91435	2.99418	3.0418	0.529022	0.562164	0.619491	0.552132	[W (N)] and [W (T)] and [B/AA (N)] and [B/AA (T)]
let-7e-3p__let-7e__0__0__22M	hsa-let-7e	MI0000066	hsa-let-7e-3p	MIMAT0004485	0	0	51692838	51692859	chr19	+	0	CTATACGGCCTCCTAGCTTTCC	CTATACGGCCTCCTAGCTTTCC	not reported	not reported	not reported	1	1	1	1	TATACGG	3p	8.94837	6.28114	6.58757	6.25004	0.731817	0.737908	0.807238	0.742565	[W (N)] and [W (T)] and [B/AA (N)] and [B/AA (T)]
let-7e-5p__let-7e__0__-1__21M	hsa-let-7e	MI0000066	hsa-let-7e-5p	MIMAT0000066	0	-1	51692793	51692813	chr19	+	0	TGAGGTAGGAGGTTGTATAGT	TGAGGTAGGAGGTTGTATAGT	not reported	not reported	not reported	1	1	1	1	GAGGTAG	5p	638.637	280.772	760.239	298.733	0.983518	0.969545	0.983698	0.969903	[W (N)] and [W (T)] and [B/AA (N)] and [B/AA (T)]
let-7e-5p__let-7e__0__-1__2MC18M	hsa-let-7e	MI0000066	hsa-let-7e-5p	MIMAT0000066	0	-1	51692793	51692813	chr19	+	1	TGCGGTAGGAGGTTGTATAGT	TGAGGTAGGAGGTTGTATAGT	not reported	3:A-C	not reported	0	1	0	1	GCGGTAG	5p	1.03081	2.11868	1	2.62004	0.000179147	0.497492	0.0442494	0.37603	[W (T)] and [B/AA (T)]
let-7e-5p__let-7e__0__-1__2MCT17M	hsa-let-7e	MI0000066	hsa-let-7e-5p	MIMAT0000066	0	-1	51692793	51692813	chr19	+	2	TGCTGTAGGAGGTTGTATAGT	TGAGGTAGGAGGTTGTATAGT	not reported	3:A-C;4:G-T	not reported	0	1	0	0	GCTGTAG	5p	1	1.79686	1	2.19945	0.000179147	0.394661	0.000179147	0.275528	[B/AA (T)]
let-7e-5p__let-7e__0__-1__3MT17M	hsa-let-7e	MI0000066	hsa-let-7e-5p	MIMAT0000066	0	-1	51692793	51692813	chr19	+	1	TGATGTAGGAGGTTGTATAGT	TGAGGTAGGAGGTTGTATAGT	not reported	4:G-T	not reported	0	1	0	1	GATGTAG	5p	1.31043	2.65837	1.10098	2.23447	0.0893945	0.404156	0.130777	0.508778	[W (T)] and [B/AA (T)]
let-7e-5p__let-7e__0__-2__20M	hsa-let-7e	MI0000066	hsa-let-7e-5p	MIMAT0000066	0	-2	51692793	51692812	chr19	+	0	TGAGGTAGGAGGTTGTATAG	TGAGGTAGGAGGTTGTATAG	not reported	not reported	not reported	1	1	1	1	GAGGTAG	5p	309.491	110.355	379.094	109.184	0.97277	0.945718	0.97474	0.947331	[W (N)] and [W (T)] and [B/AA (N)] and [B/AA (T)]
let-7e-5p__let-7e__0__-3__19M	hsa-let-7e	MI0000066	hsa-let-7e-5p	MIMAT0000066	0	-3	51692793	51692811	chr19	+	0	TGAGGTAGGAGGTTGTATA	TGAGGTAGGAGGTTGTATA	not reported	not reported	not reported	1	1	1	1	GAGGTAG	5p	31.0322	11.4528	37.0736	12.5191	0.900394	0.823361	0.906843	0.81924	[W (N)] and [W (T)] and [B/AA (N)] and [B/AA (T)]
let-7e-5p__let-7e__0__-4__18M	hsa-let-7e	MI0000066	hsa-let-7e-5p	MIMAT0000066	0	-4	51692793	51692810	chr19	+	0	TGAGGTAGGAGGTTGTAT	TGAGGTAGGAGGTTGTAT	not reported	not reported	not reported	1	1	1	1	GAGGTAG	5p	24.3717	17.0223	29.7154	25.441	0.8866	0.880867	0.891795	0.85292	[W (N)] and [W (T)] and [B/AA (N)] and [B/AA (T)]
let-7e-5p__let-7e__0__-5__17M	hsa-let-7e	MI0000066	hsa-let-7e-5p	MIMAT0000066	0	-5	51692793	51692809	chr19	+	0	TGAGGTAGGAGGTTGTA	TGAGGTAGGAGGTTGTA	not reported	not reported	not reported	1	1	1	1	GAGGTAG	5p	5.71608	4.1335	7.08113	4.68917	0.74364	0.676102	0.742386	0.656933	[W (N)] and [W (T)] and [B/AA (N)] and [B/AA (T)]
let-7e-5p__let-7e__0__-6__16M	hsa-let-7e	MI0000066	hsa-let-7e-5p	MIMAT0000066	0	-6	51692793	51692808	chr19	+	0	TGAGGTAGGAGGTTGT	TGAGGTAGGAGGTTGT	not reported	not reported	not reported	1	1	1	1	GAGGTAG	5p	6.96378	5.19882	9.76887	5.03378	0.788427	0.692942	0.77302	0.706019	[W (N)] and [W (T)] and [B/AA (N)] and [B/AA (T)]
let-7e-5p__let-7e__0__+1__23M	hsa-let-7e	MI0000066	hsa-let-7e-5p	MIMAT0000066	0	1	51692793	51692815	chr19	+	0	TGAGGTAGGAGGTTGTATAGTTG	TGAGGTAGGAGGTTGTATAGTTG	not reported	not reported	not reported	1	1	1	1	GAGGTAG	5p	26.9431	18.254	30.7747	19.4159	0.888391	0.860444	0.897707	0.857578	[W (N)] and [W (T)] and [B/AA (N)] and [B/AA (T)]
let-7e-5p__let-7e__0__+2__24M	hsa-let-7e	MI0000066	hsa-let-7e-5p	MIMAT0000066	0	2	51692793	51692816	chr19	+	0	TGAGGTAGGAGGTTGTATAGTTGA	TGAGGTAGGAGGTTGTATAGTTGA	not reported	not reported	not reported	1	1	1	1	GAGGTAG	5p	3.40053	2.81058	3.86626	3.02771	0.616267	0.559477	0.620924	0.536367	[W (N)] and [W (T)] and [B/AA (N)] and [B/AA (T)]
let-7e-5p__let-7e__0__0__11MA10M	hsa-let-7e	MI0000066	hsa-let-7e-5p	MIMAT0000066	0	0	51692793	51692814	chr19	+	1	TGAGGTAGGAGATTGTATAGTT	TGAGGTAGGAGGTTGTATAGTT	not reported	12:G-A	not reported	1	0	1	0	GAGGTAG	5p	2.04809	1.18449	2.11329	1.14409	0.340559	0.0709423	0.369223	0.0781082	[W (N)] and [B/AA (N)]
let-7e-5p__let-7e__0__0__22M	hsa-let-7e	MI0000066	hsa-let-7e-5p	MIMAT0000066	0	0	51692793	51692814	chr19	+	0	TGAGGTAGGAGGTTGTATAGTT	TGAGGTAGGAGGTTGTATAGTT	not reported	not reported	not reported	1	1	1	1	GAGGTAG	5p	860.451	532.796	1034.69	585.937	0.986385	0.980473	0.986743	0.980294	[W (N)] and [W (T)] and [B/AA (N)] and [B/AA (T)]
let-7e-5p__let-7e__0__0__2MC19M	hsa-let-7e	MI0000066	hsa-let-7e-5p	MIMAT0000066	0	0	51692793	51692814	chr19	+	1	TGCGGTAGGAGGTTGTATAGTT	TGAGGTAGGAGGTTGTATAGTT	not reported	3:A-C	not reported	0	1	0	1	GCGGTAG	5p	1	2.91364	1	4.0595	0.000179147	0.646005	0.000179147	0.551774	[W (T)] and [B/AA (T)]
let-7e-5p__let-7e__0__0__2MCT18M	hsa-let-7e	MI0000066	hsa-let-7e-5p	MIMAT0000066	0	0	51692793	51692814	chr19	+	2	TGCTGTAGGAGGTTGTATAGTT	TGAGGTAGGAGGTTGTATAGTT	not reported	3:A-C;4:G-T	not reported	0	1	0	1	GCTGTAG	5p	1	2.37837	1	3.18879	0.000179147	0.577212	0.000179147	0.453422	[W (T)] and [B/AA (T)]
let-7e-5p__let-7e__0__0__2MT19M	hsa-let-7e	MI0000066	hsa-let-7e-5p	MIMAT0000066	0	0	51692793	51692814	chr19	+	1	TGTGGTAGGAGGTTGTATAGTT	TGAGGTAGGAGGTTGTATAGTT	not reported	3:A-T	not reported	1	0	0	0	GTGGTAG	5p	1.72747	1.1894	2.51494	1.13366	0.448585	0.0659262	0.259584	0.0804371	[B/AA (N)]
let-7e-5p__let-7e__0__0__3MT18M	hsa-let-7e	MI0000066	hsa-let-7e-5p	MIMAT0000066	0	0	51692793	51692814	chr19	+	1	TGATGTAGGAGGTTGTATAGTT	TGAGGTAGGAGGTTGTATAGTT	not reported	4:G-T	not reported	0	1	0	1	GATGTAG	5p	1.51191	3.71739	1.055	3.03597	0.0752418	0.56091	0.186492	0.631852	[W (T)] and [B/AA (T)]
let-7f-1-3p__let-7f-1__0__-1__21M	hsa-let-7f-1	MI0000067	hsa-let-7f-1-3p	MIMAT0004486	0	-1	94176409	94176429	chr9	+	0	CTATACAATCTATTGCCTTCC	CTATACAATCTATTGCCTTCC	not reported	not reported	not reported	1	1	1	1	TATACAA	3p	2.34661	2.63435	2.9977	2.71857	0.530097	0.515048	0.462379	0.505374	[W (N)] and [W (T)] and [B/AA (N)] and [B/AA (T)]
let-7f-5p__let-7f-1__-1__-1__A21M	hsa-let-7f-1	MI0000067	hsa-let-7f-5p	MIMAT0000067	-1	-1	94176352	94176373	chr9	+	1	ATGAGGTAGTAGATTGTATAGT	GTGAGGTAGTAGATTGTATAGT	rs1408646493=1:G-A	not reported	not reported	1	0	1	0	TGAGGTA	5p	2.27649	1.83569	3.44854	1.94841	0.582766	0.314762	0.446435	0.28574	[W (N)] and [B/AA (N)]
let-7f-5p__let-7f-1__-1__-2__A20M	hsa-let-7f-1	MI0000067	hsa-let-7f-5p	MIMAT0000067	-1	-2	94176352	94176372	chr9	+	1	ATGAGGTAGTAGATTGTATAG	GTGAGGTAGTAGATTGTATAG	rs1408646493=1:G-A	not reported	not reported	1	0	0	0	TGAGGTA	5p	1.84907	1.40647	2.42184	1.45638	0.424937	0.19742	0.299534	0.166249	[B/AA (N)]
let-7f-5p__let-7f-1__-1__0__A22M	hsa-let-7f-1	MI0000067	hsa-let-7f-5p	MIMAT0000067	-1	0	94176352	94176374	chr9	+	1	ATGAGGTAGTAGATTGTATAGTT	GTGAGGTAGTAGATTGTATAGTT	rs1408646493=1:G-A	not reported	not reported	1	1	1	1	TGAGGTA	5p	2.24777	2.15354	3.5577	2.21956	0.592977	0.400394	0.43909	0.389824	[W (N)] and [W (T)] and [B/AA (N)] and [B/AA (T)]
let-7f-5p__let-7f-1__+1__0__21M	hsa-let-7f-1	MI0000067	hsa-let-7f-5p	MIMAT0000067	1	0	94176354	94176374	chr9	+	0	GAGGTAGTAGATTGTATAGTT	GAGGTAGTAGATTGTATAGTT	not reported	not reported	not reported	1	0	1	1	AGGTAGT	5p	2.63549	2.29583	3.6126	1.94749	0.598531	0.314583	0.523289	0.428699	[W (N)] and [W (T)] and [B/AA (N)]
let-7f-5p__let-7f-1__+3__-1__18M	hsa-let-7f-1	MI0000067	hsa-let-7f-5p	MIMAT0000067	3	-1	94176356	94176373	chr9	+	0	GGTAGTAGATTGTATAGT	GGTAGTAGATTGTATAGT	not reported	not reported	not reported	1	0	1	0	GTAGTAG	5p	2.38579	1.73333	2.47188	1.67444	0.437657	0.247402	0.471695	0.259584	[W (N)] and [B/AA (N)]
let-7f-5p__let-7f-1__+3__0__19M	hsa-let-7f-1	MI0000067	hsa-let-7f-5p	MIMAT0000067	3	0	94176356	94176374	chr9	+	0	GGTAGTAGATTGTATAGTT	GGTAGTAGATTGTATAGTT	not reported	not reported	not reported	1	1	1	1	GTAGTAG	5p	5.10955	3.84786	4.56158	3.27983	0.656575	0.587424	0.720172	0.639735	[W (N)] and [W (T)] and [B/AA (N)] and [B/AA (T)]
let-7f-5p__let-7f-1__+3__0__T1MAG15M	hsa-let-7f-1	MI0000067	hsa-let-7f-5p	MIMAT0000067	3	0	94176356	94176374	chr9	+	3	TGAGGTAGATTGTATAGTT	GGTAGTAGATTGTATAGTT	TCGA=1:G-T	3:T-A;4:A-G	not reported	1	0	1	0	GAGGTAG	5p	3.04784	1.5038	4.3898	1.38927	0.647976	0.175027	0.581333	0.197241	[W (N)] and [B/AA (N)]
let-7f-5p__let-7f-1__+4__0__18M	hsa-let-7f-1	MI0000067	hsa-let-7f-5p	MIMAT0000067	4	0	94176357	94176374	chr9	+	0	GTAGTAGATTGTATAGTT	GTAGTAGATTGTATAGTT	not reported	not reported	not reported	1	0	1	1	TAGTAGA	5p	2.21808	2.00052	2.48803	1.73869	0.441598	0.263884	0.431566	0.33196	[W (N)] and [W (T)] and [B/AA (N)]
let-7f-5p__let-7f-1__+5__+4__21M	hsa-let-7f-1	MI0000067	hsa-let-7f-5p	MIMAT0000067	5	4	94176358	94176378	chr9	+	0	TAGTAGATTGTATAGTTGTGG	TAGTAGATTGTATAGTTGTGG	not reported	not reported	not reported	0	1	1	1	AGTAGAT	5p	2.05833	3.08183	1.86653	2.3076	0.269079	0.427804	0.373164	0.570942	[W (N)] and [W (T)] and [B/AA (T)]
let-7f-5p__let-7f-1__0__-1__10MT10M	hsa-let-7f-1	MI0000067	hsa-let-7f-5p	MIMAT0000067	0	-1	94176353	94176373	chr9	+	1	TGAGGTAGTATATTGTATAGT	TGAGGTAGTAGATTGTATAGT	not reported	11:G-T	not reported	1	0	0	0	GAGGTAG	5p	1.86373	1.13983	2.86116	1.15744	0.511107	0.0797205	0.303834	0.0524901	[B/AA (N)]
let-7f-5p__let-7f-1__0__-1__12MG8M	hsa-let-7f-1	MI0000067	hsa-let-7f-5p	MIMAT0000067	0	-1	94176353	94176373	chr9	+	1	TGAGGTAGTAGAGTGTATAGT	TGAGGTAGTAGATTGTATAGT	not reported	13:T-G	not reported	1	0	0	0	GAGGTAG	5p	1.52548	1.07696	2.11649	1.04609	0.341634	0.0173773	0.191508	0.0195271	[B/AA (N)]
let-7f-5p__let-7f-1__0__-1__15MC5M	hsa-let-7f-1	MI0000067	hsa-let-7f-5p	MIMAT0000067	0	-1	94176353	94176373	chr9	+	1	TGAGGTAGTAGATTGCATAGT	TGAGGTAGTAGATTGTATAGT	rs1156338084=16:T-C	not reported	not reported	1	0	0	0	GAGGTAG	5p	1.75431	1.27171	2.12308	1.23298	0.343784	0.115729	0.268004	0.116087	[B/AA (N)]
let-7f-5p__let-7f-1__0__-1__16MG4M	hsa-let-7f-1	MI0000067	hsa-let-7f-5p	MIMAT0000067	0	-1	94176353	94176373	chr9	+	1	TGAGGTAGTAGATTGTGTAGT	TGAGGTAGTAGATTGTATAGT	not reported	17:A-G	not reported	1	0	1	0	GAGGTAG	5p	2.73489	1.46154	4.66622	1.331	0.663024	0.1555	0.540308	0.182193	[W (N)] and [B/AA (N)]
let-7f-5p__let-7f-1__0__-1__16MT4M	hsa-let-7f-1	MI0000067	hsa-let-7f-5p	MIMAT0000067	0	-1	94176353	94176373	chr9	+	1	TGAGGTAGTAGATTGTTTAGT	TGAGGTAGTAGATTGTATAGT	not reported	17:A-T	not reported	1	0	0	0	GAGGTAG	5p	1.72658	1.16866	2.0398	1.14084	0.31082	0.0691508	0.258689	0.0691508	[B/AA (N)]
let-7f-5p__let-7f-1__0__-1__17MC3M	hsa-let-7f-1	MI0000067	hsa-let-7f-5p	MIMAT0000067	0	-1	94176353	94176373	chr9	+	1	TGAGGTAGTAGATTGTACAGT	TGAGGTAGTAGATTGTATAGT	not reported	18:T-C	not reported	1	0	0	0	GAGGTAG	5p	1.71647	1.22952	2.2757	1.22036	0.391258	0.110892	0.255464	0.0987101	[B/AA (N)]
let-7f-5p__let-7f-1__0__-1__18MC2M	hsa-let-7f-1	MI0000067	hsa-let-7f-5p	MIMAT0000067	0	-1	94176353	94176373	chr9	+	1	TGAGGTAGTAGATTGTATCGT	TGAGGTAGTAGATTGTATAGT	not reported	19:A-C	not reported	0	1	0	1	GAGGTAG	5p	1.12734	2.09836	1.15875	3.20815	0.108922	0.579541	0.0791831	0.36976	[W (T)] and [B/AA (T)]
let-7f-5p__let-7f-1__0__-1__18MT2M	hsa-let-7f-1	MI0000067	hsa-let-7f-5p	MIMAT0000067	0	-1	94176353	94176373	chr9	+	1	TGAGGTAGTAGATTGTATTGT	TGAGGTAGTAGATTGTATAGT	not reported	19:A-T	not reported	1	0	0	0	GAGGTAG	5p	1.70535	1.20164	2.51587	1.21817	0.449301	0.109817	0.252418	0.086349	[B/AA (N)]
let-7f-5p__let-7f-1__0__-1__1MC19M	hsa-let-7f-1	MI0000067	hsa-let-7f-5p	MIMAT0000067	0	-1	94176353	94176373	chr9	+	1	TCAGGTAGTAGATTGTATAGT	TGAGGTAGTAGATTGTATAGT	not reported	2:G-C	not reported	1	0	1	0	CAGGTAG	5p	2.07279	1.29509	2.57049	1.2285	0.461304	0.115013	0.379792	0.125045	[W (N)] and [B/AA (N)]
let-7f-5p__let-7f-1__0__-1__1MT19M	hsa-let-7f-1	MI0000067	hsa-let-7f-5p	MIMAT0000067	0	-1	94176353	94176373	chr9	+	1	TTAGGTAGTAGATTGTATAGT	TGAGGTAGTAGATTGTATAGT	not reported	2:G-T	not reported	1	1	1	1	TAGGTAG	5p	3.90988	2.7258	7.0747	2.51209	0.743461	0.475636	0.663382	0.522573	[W (N)] and [W (T)] and [B/AA (N)] and [B/AA (T)]
let-7f-5p__let-7f-1__0__-1__21M	hsa-let-7f-1	MI0000067	hsa-let-7f-5p	MIMAT0000067	0	-1	94176353	94176373	chr9	+	0	TGAGGTAGTAGATTGTATAGT	TGAGGTAGTAGATTGTATAGT	not reported	not reported	not reported	1	1	1	1	GAGGTAG	5p	4251.29	1717.01	9458.67	1818.22	0.996775	0.991938	0.994626	0.991222	[W (N)] and [W (T)] and [B/AA (N)] and [B/AA (T)]
let-7f-5p__let-7f-1__0__-1__2MC18M	hsa-let-7f-1	MI0000067	hsa-let-7f-5p	MIMAT0000067	0	-1	94176353	94176373	chr9	+	1	TGCGGTAGTAGATTGTATAGT	TGAGGTAGTAGATTGTATAGT	not reported	3:A-C	not reported	0	1	0	1	GCGGTAG	5p	1.04835	4.84585	1	6.94776	0.000179147	0.752418	0.0528484	0.695271	[W (T)] and [B/AA (T)]
let-7f-5p__let-7f-1__0__-1__2MCT17M	hsa-let-7f-1	MI0000067	hsa-let-7f-5p	MIMAT0000067	0	-1	94176353	94176373	chr9	+	2	TGCTGTAGTAGATTGTATAGT	TGAGGTAGTAGATTGTATAGT	TCGA=4:G-T	3:A-C	not reported	0	1	0	1	GCTGTAG	5p	1	3.64062	1	5.52799	0.000179147	0.713723	0.000179147	0.625045	[W (T)] and [B/AA (T)]
let-7f-5p__let-7f-1__0__-1__2MG18M	hsa-let-7f-1	MI0000067	hsa-let-7f-5p	MIMAT0000067	0	-1	94176353	94176373	chr9	+	1	TGGGGTAGTAGATTGTATAGT	TGAGGTAGTAGATTGTATAGT	TCGA=3:A-G	not reported	27292188=3:A-G	1	0	1	0	GGGGTAG	5p	2.41362	1.28937	3.17728	1.29423	0.55052	0.141168	0.480115	0.122358	[W (N)] and [B/AA (N)]
let-7f-5p__let-7f-1__0__-1__2MT18M	hsa-let-7f-1	MI0000067	hsa-let-7f-5p	MIMAT0000067	0	-1	94176353	94176373	chr9	+	1	TGTGGTAGTAGATTGTATAGT	TGAGGTAGTAGATTGTATAGT	not reported	3:A-T	not reported	1	0	1	0	GTGGTAG	5p	4.96374	1.47709	9.59662	1.3898	0.785919	0.175385	0.715156	0.188105	[W (N)] and [B/AA (N)]
let-7f-5p__let-7f-1__0__-1__3MT17M	hsa-let-7f-1	MI0000067	hsa-let-7f-5p	MIMAT0000067	0	-1	94176353	94176373	chr9	+	1	TGATGTAGTAGATTGTATAGT	TGAGGTAGTAGATTGTATAGT	TCGA=4:G-T	not reported	not reported	1	1	1	1	GATGTAG	5p	2.22666	7.33389	2.32814	5.88291	0.402723	0.72698	0.434611	0.763346	[W (N)] and [W (T)] and [B/AA (N)] and [B/AA (T)]
let-7f-5p__let-7f-1__0__-1__5MC15M	hsa-let-7f-1	MI0000067	hsa-let-7f-5p	MIMAT0000067	0	-1	94176353	94176373	chr9	+	1	TGAGGCAGTAGATTGTATAGT	TGAGGTAGTAGATTGTATAGT	not reported	6:T-C	not reported	1	0	0	0	GAGGCAG	5p	1.82585	1.27516	2.36811	1.25399	0.412218	0.125045	0.291473	0.117341	[B/AA (N)]
let-7f-5p__let-7f-1__0__-1__5MG15M	hsa-let-7f-1	MI0000067	hsa-let-7f-5p	MIMAT0000067	0	-1	94176353	94176373	chr9	+	1	TGAGGGAGTAGATTGTATAGT	TGAGGTAGTAGATTGTATAGT	not reported	6:T-G	not reported	1	0	1	0	GAGGGAG	5p	3.1312	1.36165	5.05604	1.34922	0.679685	0.162666	0.590111	0.151738	[W (N)] and [B/AA (N)]
let-7f-5p__let-7f-1__0__-1__6MC14M	hsa-let-7f-1	MI0000067	hsa-let-7f-5p	MIMAT0000067	0	-1	94176353	94176373	chr9	+	1	TGAGGTCGTAGATTGTATAGT	TGAGGTAGTAGATTGTATAGT	not reported	7:A-C	not reported	1	0	1	0	GAGGTCG	5p	2.80216	1.10952	2.34823	1.06304	0.407918	0.0261555	0.548728	0.0356503	[W (N)] and [B/AA (N)]
let-7f-5p__let-7f-1__0__-1__6MG14M	hsa-let-7f-1	MI0000067	hsa-let-7f-5p	MIMAT0000067	0	-1	94176353	94176373	chr9	+	1	TGAGGTGGTAGATTGTATAGT	TGAGGTAGTAGATTGTATAGT	not reported	7:A-G	not reported	1	0	1	0	GAGGTGG	5p	2.5883	1.31885	2.82379	1.24945	0.503762	0.122716	0.513794	0.135614	[W (N)] and [B/AA (N)]
let-7f-5p__let-7f-1__0__-1__6MT14M	hsa-let-7f-1	MI0000067	hsa-let-7f-5p	MIMAT0000067	0	-1	94176353	94176373	chr9	+	1	TGAGGTTGTAGATTGTATAGT	TGAGGTAGTAGATTGTATAGT	not reported	7:A-T	not reported	1	0	1	0	GAGGTTG	5p	2.00338	1.11469	2.19874	1.10409	0.369043	0.051057	0.35292	0.0399498	[W (N)] and [B/AA (N)]
let-7f-5p__let-7f-1__0__-1__9MG11M	hsa-let-7f-1	MI0000067	hsa-let-7f-5p	MIMAT0000067	0	-1	94176353	94176373	chr9	+	1	TGAGGTAGTGGATTGTATAGT	TGAGGTAGTAGATTGTATAGT	not reported	10:A-G	not reported	1	0	1	0	GAGGTAG	5p	2.27088	1.39911	2.7428	1.36408	0.489609	0.167144	0.44536	0.164278	[W (N)] and [B/AA (N)]
let-7f-5p__let-7f-1__0__-1__9MT11M	hsa-let-7f-1	MI0000067	hsa-let-7f-5p	MIMAT0000067	0	-1	94176353	94176373	chr9	+	1	TGAGGTAGTTGATTGTATAGT	TGAGGTAGTAGATTGTATAGT	TCGA=10:A-T	not reported	not reported	1	0	0	0	GAGGTAG	5p	1.52554	1.1468	2.00723	1.11131	0.29613	0.0551774	0.191688	0.0558939	[B/AA (N)]
let-7f-5p__let-7f-1__0__-2__1MC18M	hsa-let-7f-1	MI0000067	hsa-let-7f-5p	MIMAT0000067	0	-2	94176353	94176372	chr9	+	1	TCAGGTAGTAGATTGTATAG	TGAGGTAGTAGATTGTATAG	not reported	2:G-C	not reported	1	0	0	0	CAGGTAG	5p	1.52207	1.13396	2.20195	1.15731	0.36976	0.0795414	0.189896	0.0499821	[B/AA (N)]
let-7f-5p__let-7f-1__0__-2__1MT18M	hsa-let-7f-1	MI0000067	hsa-let-7f-5p	MIMAT0000067	0	-2	94176353	94176372	chr9	+	1	TTAGGTAGTAGATTGTATAG	TGAGGTAGTAGATTGTATAG	not reported	2:G-T	not reported	1	0	1	0	TAGGTAG	5p	2.28689	1.80546	3.3061	1.66872	0.565926	0.245611	0.448764	0.278574	[W (N)] and [B/AA (N)]
let-7f-5p__let-7f-1__0__-2__20M	hsa-let-7f-1	MI0000067	hsa-let-7f-5p	MIMAT0000067	0	-2	94176353	94176372	chr9	+	0	TGAGGTAGTAGATTGTATAG	TGAGGTAGTAGATTGTATAG	not reported	not reported	not reported	1	1	1	1	GAGGTAG	5p	1659.05	684.163	3569.77	725.169	0.993551	0.983518	0.992297	0.982802	[W (N)] and [W (T)] and [B/AA (N)] and [B/AA (T)]
let-7f-5p__let-7f-1__0__-2__2MC17M	hsa-let-7f-1	MI0000067	hsa-let-7f-5p	MIMAT0000067	0	-2	94176353	94176372	chr9	+	1	TGCGGTAGTAGATTGTATAG	TGAGGTAGTAGATTGTATAG	not reported	3:A-C	not reported	0	1	0	1	GCGGTAG	5p	1.02127	2.9976	1.019	3.91011	0.0551774	0.636152	0.0376209	0.561268	[W (T)] and [B/AA (T)]
let-7f-5p__let-7f-1__0__-2__2MCT16M	hsa-let-7f-1	MI0000067	hsa-let-7f-5p	MIMAT0000067	0	-2	94176353	94176372	chr9	+	2	TGCTGTAGTAGATTGTATAG	TGAGGTAGTAGATTGTATAG	TCGA=4:G-T	3:A-C	not reported	0	1	0	1	GCTGTAG	5p	1	2.3206	1	3.13138	0.000179147	0.572196	0.000179147	0.435328	[W (T)] and [B/AA (T)]
let-7f-5p__let-7f-1__0__-2__2MT17M	hsa-let-7f-1	MI0000067	hsa-let-7f-5p	MIMAT0000067	0	-2	94176353	94176372	chr9	+	1	TGTGGTAGTAGATTGTATAG	TGAGGTAGTAGATTGTATAG	not reported	3:A-T	not reported	1	0	1	0	GTGGTAG	5p	3.18948	1.32502	5.98255	1.17068	0.71229	0.0868864	0.598173	0.138123	[W (N)] and [B/AA (N)]
let-7f-5p__let-7f-1__0__-2__3MT16M	hsa-let-7f-1	MI0000067	hsa-let-7f-5p	MIMAT0000067	0	-2	94176353	94176372	chr9	+	1	TGATGTAGTAGATTGTATAG	TGAGGTAGTAGATTGTATAG	TCGA=4:G-T	not reported	not reported	0	1	0	1	GATGTAG	5p	1.47965	3.93122	1.43651	3.08637	0.178968	0.566822	0.177893	0.645288	[W (T)] and [B/AA (T)]
let-7f-5p__let-7f-1__0__-2__5MG14M	hsa-let-7f-1	MI0000067	hsa-let-7f-5p	MIMAT0000067	0	-2	94176353	94176372	chr9	+	1	TGAGGGAGTAGATTGTATAG	TGAGGTAGTAGATTGTATAG	not reported	6:T-G	not reported	1	0	1	0	GAGGGAG	5p	2.07969	1.14752	2.75577	1.21204	0.492834	0.107488	0.382659	0.0564314	[W (N)] and [B/AA (N)]
let-7f-5p__let-7f-1__0__-3__19M	hsa-let-7f-1	MI0000067	hsa-let-7f-5p	MIMAT0000067	0	-3	94176353	94176371	chr9	+	0	TGAGGTAGTAGATTGTATA	TGAGGTAGTAGATTGTATA	not reported	not reported	not reported	1	1	1	1	GAGGTAG	5p	181.051	62.5369	410.665	79.4809	0.974919	0.935328	0.963096	0.930491	[W (N)] and [W (T)] and [B/AA (N)] and [B/AA (T)]
let-7f-5p__let-7f-1__0__-4__18M	hsa-let-7f-1	MI0000067	hsa-let-7f-5p	MIMAT0000067	0	-4	94176353	94176370	chr9	+	0	TGAGGTAGTAGATTGTAT	TGAGGTAGTAGATTGTAT	not reported	not reported	not reported	1	1	1	1	GAGGTAG	5p	177.888	110.549	425.073	173.756	0.976173	0.957542	0.962737	0.947689	[W (N)] and [W (T)] and [B/AA (N)] and [B/AA (T)]
let-7f-5p__let-7f-1__0__-5__17M	hsa-let-7f-1	MI0000067	hsa-let-7f-5p	MIMAT0000067	0	-5	94176353	94176369	chr9	+	0	TGAGGTAGTAGATTGTA	TGAGGTAGTAGATTGTA	not reported	not reported	not reported	1	1	1	1	GAGGTAG	5p	53.1696	20.7714	120.876	28.0492	0.950197	0.88857	0.929058	0.86761	[W (N)] and [W (T)] and [B/AA (N)] and [B/AA (T)]
let-7f-5p__let-7f-1__0__-6__16M	hsa-let-7f-1	MI0000067	hsa-let-7f-5p	MIMAT0000067	0	-6	94176353	94176368	chr9	+	0	TGAGGTAGTAGATTGT	TGAGGTAGTAGATTGT	not reported	not reported	not reported	1	1	1	1	GAGGTAG	5p	38.7468	26.8902	90.3021	26.3324	0.938552	0.883196	0.917055	0.888391	[W (N)] and [W (T)] and [B/AA (N)] and [B/AA (T)]
let-7f-5p__let-7f-1__0__+1__22MT	hsa-let-7f-1	MI0000067	hsa-let-7f-5p	MIMAT0000067	0	1	94176353	94176375	chr9	+	1	TGAGGTAGTAGATTGTATAGTTT	TGAGGTAGTAGATTGTATAGTTG	rs1485411432=23:G-T	not reported	not reported	1	1	1	1	GAGGTAG	5p	59.2246	45.624	160.835	56.2673	0.956826	0.924758	0.932103	0.916876	[W (N)] and [W (T)] and [B/AA (N)] and [B/AA (T)]
let-7f-5p__let-7f-1__0__+1__23M	hsa-let-7f-1	MI0000067	hsa-let-7f-5p	MIMAT0000067	0	1	94176353	94176375	chr9	+	0	TGAGGTAGTAGATTGTATAGTTG	TGAGGTAGTAGATTGTATAGTTG	not reported	not reported	not reported	1	1	1	1	GAGGTAG	5p	14.3136	10.5585	27.9599	11.4151	0.883017	0.81297	0.855249	0.811537	[W (N)] and [W (T)] and [B/AA (N)] and [B/AA (T)]
let-7f-5p__let-7f-1__0__+2__24M	hsa-let-7f-1	MI0000067	hsa-let-7f-5p	MIMAT0000067	0	2	94176353	94176376	chr9	+	0	TGAGGTAGTAGATTGTATAGTTGT	TGAGGTAGTAGATTGTATAGTTGT	not reported	not reported	not reported	1	0	0	0	GAGGTAG	5p	1.82261	1.48655	2.15033	1.72191	0.353278	0.259047	0.290398	0.192046	[B/AA (N)]
let-7f-5p__let-7f-1__0__0__10MT11M	hsa-let-7f-1	MI0000067	hsa-let-7f-5p	MIMAT0000067	0	0	94176353	94176374	chr9	+	1	TGAGGTAGTATATTGTATAGTT	TGAGGTAGTAGATTGTATAGTT	not reported	11:G-T	not reported	1	0	1	0	GAGGTAG	5p	2.41372	1.28892	3.75121	1.34626	0.60928	0.160695	0.480294	0.121999	[W (N)] and [B/AA (N)]
let-7f-5p__let-7f-1__0__0__12MC9M	hsa-let-7f-1	MI0000067	hsa-let-7f-5p	MIMAT0000067	0	0	94176353	94176374	chr9	+	1	TGAGGTAGTAGACTGTATAGTT	TGAGGTAGTAGATTGTATAGTT	rs1421386283=13:T-C	not reported	not reported	1	0	0	0	GAGGTAG	5p	1.72145	1.33238	2.24697	1.36485	0.382659	0.167503	0.256897	0.141526	[B/AA (N)]
let-7f-5p__let-7f-1__0__0__12MG9M	hsa-let-7f-1	MI0000067	hsa-let-7f-5p	MIMAT0000067	0	0	94176353	94176374	chr9	+	1	TGAGGTAGTAGAGTGTATAGTT	TGAGGTAGTAGATTGTATAGTT	not reported	13:T-G	not reported	1	0	0	0	GAGGTAG	5p	1.85131	1.14703	2.08998	1.08111	0.333035	0.0379792	0.30043	0.0560731	[B/AA (N)]
let-7f-5p__let-7f-1__0__0__13MC8M	hsa-let-7f-1	MI0000067	hsa-let-7f-5p	MIMAT0000067	0	0	94176353	94176374	chr9	+	1	TGAGGTAGTAGATCGTATAGTT	TGAGGTAGTAGATTGTATAGTT	not reported	14:T-C	not reported	1	0	1	0	GAGGTAG	5p	2.01447	1.39288	2.62727	1.43341	0.47259	0.190434	0.35722	0.162128	[W (N)] and [B/AA (N)]
let-7f-5p__let-7f-1__0__0__14MC7M	hsa-let-7f-1	MI0000067	hsa-let-7f-5p	MIMAT0000067	0	0	94176353	94176374	chr9	+	1	TGAGGTAGTAGATTCTATAGTT	TGAGGTAGTAGATTGTATAGTT	not reported	15:G-C	not reported	1	0	0	0	GAGGTAG	5p	1.52009	1.28089	2.10156	1.1945	0.336618	0.0979936	0.18918	0.119133	[B/AA (N)]
let-7f-5p__let-7f-1__0__0__14MT7M	hsa-let-7f-1	MI0000067	hsa-let-7f-5p	MIMAT0000067	0	0	94176353	94176374	chr9	+	1	TGAGGTAGTAGATTTTATAGTT	TGAGGTAGTAGATTGTATAGTT	not reported	15:G-T	not reported	1	0	1	0	GAGGTAG	5p	2.30807	1.43866	3.50401	1.49748	0.587245	0.206557	0.45378	0.174848	[W (N)] and [B/AA (N)]
let-7f-5p__let-7f-1__0__0__15MC6M	hsa-let-7f-1	MI0000067	hsa-let-7f-5p	MIMAT0000067	0	0	94176353	94176374	chr9	+	1	TGAGGTAGTAGATTGCATAGTT	TGAGGTAGTAGATTGTATAGTT	rs1156338084=16:T-C	not reported	not reported	1	0	1	0	GAGGTAG	5p	2.31305	1.67517	3.31189	1.71485	0.566464	0.257435	0.455034	0.245611	[W (N)] and [B/AA (N)]
let-7f-5p__let-7f-1__0__0__15MG6M	hsa-let-7f-1	MI0000067	hsa-let-7f-5p	MIMAT0000067	0	0	94176353	94176374	chr9	+	1	TGAGGTAGTAGATTGGATAGTT	TGAGGTAGTAGATTGTATAGTT	not reported	16:T-G	not reported	1	0	1	0	GAGGTAG	5p	2.21998	1.29225	2.54063	1.31139	0.454497	0.148513	0.432641	0.124149	[W (N)] and [B/AA (N)]
let-7f-5p__let-7f-1__0__0__16MC5M	hsa-let-7f-1	MI0000067	hsa-let-7f-5p	MIMAT0000067	0	0	94176353	94176374	chr9	+	1	TGAGGTAGTAGATTGTCTAGTT	TGAGGTAGTAGATTGTATAGTT	not reported	17:A-C	not reported	0	1	0	0	GAGGTAG	5p	1.31355	1.87111	1.71524	2.06474	0.236833	0.347187	0.131852	0.294518	[B/AA (T)]
let-7f-5p__let-7f-1__0__0__16MG5M	hsa-let-7f-1	MI0000067	hsa-let-7f-5p	MIMAT0000067	0	0	94176353	94176374	chr9	+	1	TGAGGTAGTAGATTGTGTAGTT	TGAGGTAGTAGATTGTATAGTT	not reported	17:A-G	not reported	1	0	1	0	GAGGTAG	5p	3.07159	1.64373	4.21574	1.72107	0.637406	0.258689	0.583662	0.237012	[W (N)] and [B/AA (N)]
let-7f-5p__let-7f-1__0__0__16MT5M	hsa-let-7f-1	MI0000067	hsa-let-7f-5p	MIMAT0000067	0	0	94176353	94176374	chr9	+	1	TGAGGTAGTAGATTGTTTAGTT	TGAGGTAGTAGATTGTATAGTT	not reported	17:A-T	not reported	1	0	1	0	GAGGTAG	5p	2.0064	1.30807	2.50239	1.4142	0.444285	0.184343	0.354532	0.131852	[W (N)] and [B/AA (N)]
let-7f-5p__let-7f-1__0__0__17MC4M	hsa-let-7f-1	MI0000067	hsa-let-7f-5p	MIMAT0000067	0	0	94176353	94176374	chr9	+	1	TGAGGTAGTAGATTGTACAGTT	TGAGGTAGTAGATTGTATAGTT	not reported	18:T-C	not reported	1	0	0	0	GAGGTAG	5p	1.82062	1.4365	2.07867	1.36742	0.327839	0.168398	0.290039	0.174489	[B/AA (N)]
let-7f-5p__let-7f-1__0__0__17MG4M	hsa-let-7f-1	MI0000067	hsa-let-7f-5p	MIMAT0000067	0	0	94176353	94176374	chr9	+	1	TGAGGTAGTAGATTGTAGAGTT	TGAGGTAGTAGATTGTATAGTT	not reported	18:T-G	not reported	1	0	0	0	GAGGTAG	5p	1.77102	1.11492	2.0366	1.13433	0.308671	0.0661053	0.273558	0.0403081	[B/AA (N)]
let-7f-5p__let-7f-1__0__0__18MC3M	hsa-let-7f-1	MI0000067	hsa-let-7f-5p	MIMAT0000067	0	0	94176353	94176374	chr9	+	1	TGAGGTAGTAGATTGTATCGTT	TGAGGTAGTAGATTGTATAGTT	not reported	19:A-C	not reported	0	1	0	1	GAGGTAG	5p	1.335	3.26507	1.54334	6.52116	0.203332	0.744715	0.13866	0.591007	[W (T)] and [B/AA (T)]
let-7f-5p__let-7f-1__0__0__18MG3M	hsa-let-7f-1	MI0000067	hsa-let-7f-5p	MIMAT0000067	0	0	94176353	94176374	chr9	+	1	TGAGGTAGTAGATTGTATGGTT	TGAGGTAGTAGATTGTATAGTT	not reported	19:A-G	not reported	1	0	1	0	GAGGTAG	5p	2.13881	1.45615	3.30243	1.57103	0.565389	0.221605	0.406664	0.180222	[W (N)] and [B/AA (N)]
let-7f-5p__let-7f-1__0__0__19MC2M	hsa-let-7f-1	MI0000067	hsa-let-7f-5p	MIMAT0000067	0	0	94176353	94176374	chr9	+	1	TGAGGTAGTAGATTGTATACTT	TGAGGTAGTAGATTGTATAGTT	not reported	20:G-C	not reported	1	0	1	0	GAGGTAG	5p	2.04038	1.30111	2.89452	1.30779	0.515228	0.146722	0.366714	0.129344	[W (N)] and [B/AA (N)]
let-7f-5p__let-7f-1__0__0__19MT2M	hsa-let-7f-1	MI0000067	hsa-let-7f-5p	MIMAT0000067	0	0	94176353	94176374	chr9	+	1	TGAGGTAGTAGATTGTATATTT	TGAGGTAGTAGATTGTATAGTT	not reported	20:G-T	not reported	1	0	1	0	GAGGTAG	5p	4.0147	1.74604	6.49761	1.88456	0.729667	0.29828	0.669473	0.26263	[W (N)] and [B/AA (N)]
let-7f-5p__let-7f-1__0__0__1MA20M	hsa-let-7f-1	MI0000067	hsa-let-7f-5p	MIMAT0000067	0	0	94176353	94176374	chr9	+	1	TAAGGTAGTAGATTGTATAGTT	TGAGGTAGTAGATTGTATAGTT	not reported	2:G-A	not reported	1	0	0	0	AAGGTAG	5p	1.91082	1.55611	2.45211	1.3613	0.432103	0.166428	0.321032	0.213185	[B/AA (N)]
let-7f-5p__let-7f-1__0__0__1MC20M	hsa-let-7f-1	MI0000067	hsa-let-7f-5p	MIMAT0000067	0	0	94176353	94176374	chr9	+	1	TCAGGTAGTAGATTGTATAGTT	TGAGGTAGTAGATTGTATAGTT	not reported	2:G-C	not reported	1	0	1	0	CAGGTAG	5p	2.92951	1.54271	4.66498	1.52777	0.662666	0.213185	0.567539	0.20799	[W (N)] and [B/AA (N)]
let-7f-5p__let-7f-1__0__0__1MT1MT18M	hsa-let-7f-1	MI0000067	hsa-let-7f-5p	MIMAT0000067	0	0	94176353	94176374	chr9	+	2	TTATGTAGTAGATTGTATAGTT	TGAGGTAGTAGATTGTATAGTT	TCGA=4:G-T	2:G-T	not reported	0	0	0	1	TATGTAG	5p	1.04033	2.09767	1	1.80421	0.000179147	0.279828	0.0489072	0.369043	[W (T)]
let-7f-5p__let-7f-1__0__0__1MT20M	hsa-let-7f-1	MI0000067	hsa-let-7f-5p	MIMAT0000067	0	0	94176353	94176374	chr9	+	1	TTAGGTAGTAGATTGTATAGTT	TGAGGTAGTAGATTGTATAGTT	not reported	2:G-T	not reported	1	1	1	1	TAGGTAG	5p	5.43396	4.6326	9.86217	4.25182	0.789144	0.658545	0.732712	0.684163	[W (N)] and [W (T)] and [B/AA (N)] and [B/AA (T)]
let-7f-5p__let-7f-1__0__0__1MTC19M	hsa-let-7f-1	MI0000067	hsa-let-7f-5p	MIMAT0000067	0	0	94176353	94176374	chr9	+	2	TTCGGTAGTAGATTGTATAGTT	TGAGGTAGTAGATTGTATAGTT	not reported	2:G-T;3:A-C	not reported	0	1	0	1	TCGGTAG	5p	1	2.34024	1	2.18176	0.000179147	0.387854	0.000179147	0.442852	[W (T)] and [B/AA (T)]
let-7f-5p__let-7f-1__0__0__22M	hsa-let-7f-1	MI0000067	hsa-let-7f-5p	MIMAT0000067	0	0	94176353	94176374	chr9	+	0	TGAGGTAGTAGATTGTATAGTT	TGAGGTAGTAGATTGTATAGTT	not reported	not reported	not reported	1	1	1	1	GAGGTAG	5p	8306.05	4431.77	18907.5	4966.62	0.998746	0.996238	0.997313	0.9957	[W (N)] and [W (T)] and [B/AA (N)] and [B/AA (T)]
let-7f-5p__let-7f-1__0__0__2MC19M	hsa-let-7f-1	MI0000067	hsa-let-7f-5p	MIMAT0000067	0	0	94176353	94176374	chr9	+	1	TGCGGTAGTAGATTGTATAGTT	TGAGGTAGTAGATTGTATAGTT	not reported	3:A-C	not reported	0	1	0	1	GCGGTAG	5p	1.10687	8.73441	1.17203	14.7957	0.111788	0.840021	0.0738087	0.78771	[W (T)] and [B/AA (T)]
let-7f-5p__let-7f-1__0__0__2MCT18M	hsa-let-7f-1	MI0000067	hsa-let-7f-5p	MIMAT0000067	0	0	94176353	94176374	chr9	+	2	TGCTGTAGTAGATTGTATAGTT	TGAGGTAGTAGATTGTATAGTT	TCGA=4:G-T	3:A-C	not reported	0	1	0	1	GCTGTAG	5p	1	6.07974	1	10.2938	0.000179147	0.800609	0.000179147	0.736654	[W (T)] and [B/AA (T)]
let-7f-5p__let-7f-1__0__0__2MG19M	hsa-let-7f-1	MI0000067	hsa-let-7f-5p	MIMAT0000067	0	0	94176353	94176374	chr9	+	1	TGGGGTAGTAGATTGTATAGTT	TGAGGTAGTAGATTGTATAGTT	TCGA=3:A-G	not reported	27292188=3:A-G	1	0	1	0	GGGGTAG	5p	3.32373	1.65382	4.68816	1.78065	0.66392	0.273916	0.613579	0.23952	[W (N)] and [B/AA (N)]
let-7f-5p__let-7f-1__0__0__2MT19M	hsa-let-7f-1	MI0000067	hsa-let-7f-5p	MIMAT0000067	0	0	94176353	94176374	chr9	+	1	TGTGGTAGTAGATTGTATAGTT	TGAGGTAGTAGATTGTATAGTT	not reported	3:A-T	not reported	1	0	1	0	GTGGTAG	5p	7.97259	1.97392	20.4294	1.72826	0.85919	0.261555	0.791473	0.324436	[W (N)] and [B/AA (N)]
let-7f-5p__let-7f-1__0__0__3MA18M	hsa-let-7f-1	MI0000067	hsa-let-7f-5p	MIMAT0000067	0	0	94176353	94176374	chr9	+	1	TGAAGTAGTAGATTGTATAGTT	TGAGGTAGTAGATTGTATAGTT	not reported	4:G-A	not reported	1	0	1	0	GAAGTAG	5p	2.15909	1.34813	2.41656	1.35057	0.423504	0.163382	0.413293	0.147438	[W (N)] and [B/AA (N)]
let-7f-5p__let-7f-1__0__0__3MC18M	hsa-let-7f-1	MI0000067	hsa-let-7f-5p	MIMAT0000067	0	0	94176353	94176374	chr9	+	1	TGACGTAGTAGATTGTATAGTT	TGAGGTAGTAGATTGTATAGTT	not reported	4:G-C	not reported	1	0	0	0	GACGTAG	5p	1.94322	1.23656	2.16333	1.25353	0.357757	0.124686	0.334289	0.101756	[B/AA (N)]
let-7f-5p__let-7f-1__0__0__3MT18M	hsa-let-7f-1	MI0000067	hsa-let-7f-5p	MIMAT0000067	0	0	94176353	94176374	chr9	+	1	TGATGTAGTAGATTGTATAGTT	TGAGGTAGTAGATTGTATAGTT	TCGA=4:G-T	not reported	not reported	1	1	1	1	GATGTAG	5p	3.19631	14.155	3.18807	13.3172	0.552132	0.829631	0.599068	0.838051	[W (N)] and [W (T)] and [B/AA (N)] and [B/AA (T)]
let-7f-5p__let-7f-1__0__0__4MA17M	hsa-let-7f-1	MI0000067	hsa-let-7f-5p	MIMAT0000067	0	0	94176353	94176374	chr9	+	1	TGAGATAGTAGATTGTATAGTT	TGAGGTAGTAGATTGTATAGTT	not reported	5:G-A	not reported	0	1	0	0	GAGATAG	5p	1.40697	1.26735	1.47677	2.38867	0.188642	0.448585	0.158904	0.113221	[B/AA (T)]
let-7f-5p__let-7f-1__0__0__4MT17M	hsa-let-7f-1	MI0000067	hsa-let-7f-5p	MIMAT0000067	0	0	94176353	94176374	chr9	+	1	TGAGTTAGTAGATTGTATAGTT	TGAGGTAGTAGATTGTATAGTT	not reported	5:G-T	not reported	1	1	0	0	GAGTTAG	5p	1.95837	1.41419	2.65042	2.29323	0.475099	0.424042	0.340021	0.168936	[B/AA (N)] and [B/AA (T)]
let-7f-5p__let-7f-1__0__0__5MC16M	hsa-let-7f-1	MI0000067	hsa-let-7f-5p	MIMAT0000067	0	0	94176353	94176374	chr9	+	1	TGAGGCAGTAGATTGTATAGTT	TGAGGTAGTAGATTGTATAGTT	not reported	6:T-C	not reported	1	0	1	0	GAGGCAG	5p	2.58198	1.59066	3.41056	1.6451	0.578108	0.238087	0.512719	0.223576	[W (N)] and [B/AA (N)]
let-7f-5p__let-7f-1__0__0__5MG16M	hsa-let-7f-1	MI0000067	hsa-let-7f-5p	MIMAT0000067	0	0	94176353	94176374	chr9	+	1	TGAGGGAGTAGATTGTATAGTT	TGAGGTAGTAGATTGTATAGTT	not reported	6:T-G	not reported	1	0	1	0	GAGGGAG	5p	4.79632	1.71262	7.7469	1.79914	0.756001	0.278395	0.708348	0.255464	[W (N)] and [B/AA (N)]
let-7f-5p__let-7f-1__0__0__6MC15M	hsa-let-7f-1	MI0000067	hsa-let-7f-5p	MIMAT0000067	0	0	94176353	94176374	chr9	+	1	TGAGGTCGTAGATTGTATAGTT	TGAGGTAGTAGATTGTATAGTT	not reported	7:A-C	not reported	1	0	1	0	GAGGTCG	5p	3.74794	1.19751	2.78343	1.10855	0.497492	0.0532067	0.651738	0.0845575	[W (N)] and [B/AA (N)]
let-7f-5p__let-7f-1__0__0__6MG15M	hsa-let-7f-1	MI0000067	hsa-let-7f-5p	MIMAT0000067	0	0	94176353	94176374	chr9	+	1	TGAGGTGGTAGATTGTATAGTT	TGAGGTAGTAGATTGTATAGTT	not reported	7:A-G	not reported	1	0	1	0	GAGGTGG	5p	4.01626	1.89264	5.59116	1.96958	0.699749	0.31924	0.669652	0.301147	[W (N)] and [B/AA (N)]
let-7f-5p__let-7f-1__0__0__6MT15M	hsa-let-7f-1	MI0000067	hsa-let-7f-5p	MIMAT0000067	0	0	94176353	94176374	chr9	+	1	TGAGGTTGTAGATTGTATAGTT	TGAGGTAGTAGATTGTATAGTT	not reported	7:A-T	not reported	1	0	1	0	GAGGTTG	5p	2.3202	1.21681	2.70689	1.3319	0.483698	0.155858	0.456288	0.0931566	[W (N)] and [B/AA (N)]
let-7f-5p__let-7f-1__0__0__7MT14M	hsa-let-7f-1	MI0000067	hsa-let-7f-5p	MIMAT0000067	0	0	94176353	94176374	chr9	+	1	TGAGGTATTAGATTGTATAGTT	TGAGGTAGTAGATTGTATAGTT	not reported	8:G-T	not reported	1	0	0	0	GAGGTAT	5p	1.87631	1.38075	3.13805	1.27937	0.54622	0.135077	0.307954	0.15765	[B/AA (N)]
let-7f-5p__let-7f-1__0__0__8MC13M	hsa-let-7f-1	MI0000067	hsa-let-7f-5p	MIMAT0000067	0	0	94176353	94176374	chr9	+	1	TGAGGTAGCAGATTGTATAGTT	TGAGGTAGTAGATTGTATAGTT	not reported	9:T-C	not reported	1	0	1	0	GAGGTAG	5p	2.11762	1.41624	2.90649	1.42514	0.517198	0.188463	0.398961	0.169832	[W (N)] and [B/AA (N)]
let-7f-5p__let-7f-1__0__0__9MC12M	hsa-let-7f-1	MI0000067	hsa-let-7f-5p	MIMAT0000067	0	0	94176353	94176374	chr9	+	1	TGAGGTAGTCGATTGTATAGTT	TGAGGTAGTAGATTGTATAGTT	not reported	10:A-C	not reported	0	0	1	0	GAGGTAG	5p	2.08951	1.114	1.30878	1.10169	0.146542	0.0492655	0.386421	0.0390541	[W (N)]
let-7f-5p__let-7f-1__0__0__9MG12M	hsa-let-7f-1	MI0000067	hsa-let-7f-5p	MIMAT0000067	0	0	94176353	94176374	chr9	+	1	TGAGGTAGTGGATTGTATAGTT	TGAGGTAGTAGATTGTATAGTT	not reported	10:A-G	not reported	1	0	1	0	GAGGTAG	5p	2.40928	1.71658	3.37304	1.68922	0.574167	0.250806	0.479219	0.256718	[W (N)] and [B/AA (N)]
let-7g-3p__let-7g__0__-1__20M	hsa-let-7g	MI0000433	hsa-let-7g-3p	MIMAT0004584	0	-1	52268281	52268300	chr3	-	0	CTGTACAGGCCACTGCCTTG	CTGTACAGGCCACTGCCTTG	not reported	not reported	not reported	0	1	0	1	TGTACAG	3p	1.83283	3.82083	1.81817	4.183	0.258151	0.654067	0.293802	0.638302	[W (T)] and [B/AA (T)]
let-7g-3p__let-7g__0__0__21M	hsa-let-7g	MI0000433	hsa-let-7g-3p	MIMAT0004584	0	0	52268280	52268300	chr3	-	0	CTGTACAGGCCACTGCCTTGC	CTGTACAGGCCACTGCCTTGC	not reported	not reported	not reported	1	1	1	1	TGTACAG	3p	4.26182	24.0365	3.5002	27.0975	0.586886	0.886241	0.685597	0.879434	[W (N)] and [W (T)] and [B/AA (N)] and [B/AA (T)]
let-7g-5p__let-7g__-1__-1__22M	hsa-let-7g	MI0000433	hsa-let-7g-5p	MIMAT0000414	-1	-1	52268337	52268358	chr3	-	0	CTGAGGTAGTAGTTTGTACAGT	CTGAGGTAGTAGTTTGTACAGT	not reported	not reported	not reported	0	1	0	1	TGAGGTA	5p	1.95949	2.19445	1.94842	2.42314	0.282336	0.45593	0.340559	0.401648	[W (T)] and [B/AA (T)]
let-7g-5p__let-7g__-1__0__23M	hsa-let-7g	MI0000433	hsa-let-7g-5p	MIMAT0000414	-1	0	52268336	52268358	chr3	-	0	CTGAGGTAGTAGTTTGTACAGTT	CTGAGGTAGTAGTTTGTACAGTT	not reported	not reported	not reported	1	1	1	1	TGAGGTA	5p	2.34231	3.51565	2.92327	4.13054	0.519885	0.650842	0.461483	0.615013	[W (N)] and [W (T)] and [B/AA (N)] and [B/AA (T)]
let-7g-5p__let-7g__+3__0__19M	hsa-let-7g	MI0000433	hsa-let-7g-5p	MIMAT0000414	3	0	52268336	52268354	chr3	-	0	GGTAGTAGTTTGTACAGTT	GGTAGTAGTTTGTACAGTT	not reported	not reported	not reported	0	1	1	1	GTAGTAG	5p	2.08707	2.90924	1.83487	2.51946	0.261376	0.477965	0.384987	0.551057	[W (N)] and [W (T)] and [B/AA (T)]
let-7g-5p__let-7g__0__-1__17MT3M	hsa-let-7g	MI0000433	hsa-let-7g-5p	MIMAT0000414	0	-1	52268337	52268357	chr3	-	1	TGAGGTAGTAGTTTGTATAGT	TGAGGTAGTAGTTTGTACAGT	not reported	18:C-T	not reported	1	0	1	0	GAGGTAG	5p	3.70359	1.83042	4.43044	1.85049	0.649409	0.290756	0.648692	0.283948	[W (N)] and [B/AA (N)]
let-7g-5p__let-7g__0__-1__21M	hsa-let-7g	MI0000433	hsa-let-7g-5p	MIMAT0000414	0	-1	52268337	52268357	chr3	-	0	TGAGGTAGTAGTTTGTACAGT	TGAGGTAGTAGTTTGTACAGT	not reported	not reported	not reported	1	1	1	1	GAGGTAG	5p	225.04	114.589	380.882	125.497	0.972949	0.949301	0.969366	0.948226	[W (N)] and [W (T)] and [B/AA (N)] and [B/AA (T)]
let-7g-5p__let-7g__0__-2__17MT2M	hsa-let-7g	MI0000433	hsa-let-7g-5p	MIMAT0000414	0	-2	52268338	52268357	chr3	-	1	TGAGGTAGTAGTTTGTATAG	TGAGGTAGTAGTTTGTACAG	not reported	18:C-T	not reported	1	0	1	0	GAGGTAG	5p	2.11698	1.51332	2.20425	1.59506	0.370477	0.227159	0.398782	0.200824	[W (N)] and [B/AA (N)]
let-7g-5p__let-7g__0__-2__20M	hsa-let-7g	MI0000433	hsa-let-7g-5p	MIMAT0000414	0	-2	52268338	52268357	chr3	-	0	TGAGGTAGTAGTTTGTACAG	TGAGGTAGTAGTTTGTACAG	not reported	not reported	not reported	1	1	1	1	GAGGTAG	5p	32.5941	23.8715	54.278	26.2932	0.917771	0.883017	0.908814	0.879076	[W (N)] and [W (T)] and [B/AA (N)] and [B/AA (T)]
let-7g-5p__let-7g__0__-3__19M	hsa-let-7g	MI0000433	hsa-let-7g-5p	MIMAT0000414	0	-3	52268339	52268357	chr3	-	0	TGAGGTAGTAGTTTGTACA	TGAGGTAGTAGTTTGTACA	not reported	not reported	not reported	1	1	1	1	GAGGTAG	5p	19.7358	7.52372	35.3391	7.45785	0.897528	0.763526	0.88033	0.767109	[W (N)] and [W (T)] and [B/AA (N)] and [B/AA (T)]
let-7g-5p__let-7g__0__-4__18M	hsa-let-7g	MI0000433	hsa-let-7g-5p	MIMAT0000414	0	-4	52268340	52268357	chr3	-	0	TGAGGTAGTAGTTTGTAC	TGAGGTAGTAGTTTGTAC	not reported	not reported	not reported	1	1	1	1	GAGGTAG	5p	10.9579	11.0004	16.9294	17.5499	0.8445	0.853816	0.83196	0.814762	[W (N)] and [W (T)] and [B/AA (N)] and [B/AA (T)]
let-7g-5p__let-7g__0__-5__17M	hsa-let-7g	MI0000433	hsa-let-7g-5p	MIMAT0000414	0	-5	52268341	52268357	chr3	-	0	TGAGGTAGTAGTTTGTA	TGAGGTAGTAGTTTGTA	not reported	not reported	not reported	1	1	1	1	GAGGTAG	5p	6.10654	3.66835	9.33215	5.50678	0.781082	0.713185	0.752777	0.62809	[W (N)] and [W (T)] and [B/AA (N)] and [B/AA (T)]
let-7g-5p__let-7g__0__-6__16M	hsa-let-7g	MI0000433	hsa-let-7g-5p	MIMAT0000414	0	-6	52268342	52268357	chr3	-	0	TGAGGTAGTAGTTTGT	TGAGGTAGTAGTTTGT	not reported	not reported	not reported	1	1	1	1	GAGGTAG	5p	10.8046	8.27397	13.2602	7.12617	0.81924	0.756718	0.829631	0.779649	[W (N)] and [W (T)] and [B/AA (N)] and [B/AA (T)]
let-7g-5p__let-7g__0__+1__23M	hsa-let-7g	MI0000433	hsa-let-7g-5p	MIMAT0000414	0	1	52268335	52268357	chr3	-	0	TGAGGTAGTAGTTTGTACAGTTT	TGAGGTAGTAGTTTGTACAGTTT	not reported	not reported	not reported	1	1	1	1	GAGGTAG	5p	6.31565	8.26471	9.96432	11.2448	0.790577	0.811537	0.758509	0.779111	[W (N)] and [W (T)] and [B/AA (N)] and [B/AA (T)]
let-7g-5p__let-7g__0__0__11MG10M	hsa-let-7g	MI0000433	hsa-let-7g-5p	MIMAT0000414	0	0	52268336	52268357	chr3	-	1	TGAGGTAGTAGGTTGTACAGTT	TGAGGTAGTAGTTTGTACAGTT	not reported	12:T-G	not reported	1	1	1	1	GAGGTAG	5p	3.4902	2.16401	4.00597	2.28267	0.622537	0.421892	0.630419	0.392691	[W (N)] and [W (T)] and [B/AA (N)] and [B/AA (T)]
let-7g-5p__let-7g__0__0__17MT4M	hsa-let-7g	MI0000433	hsa-let-7g-5p	MIMAT0000414	0	0	52268336	52268357	chr3	-	1	TGAGGTAGTAGTTTGTATAGTT	TGAGGTAGTAGTTTGTACAGTT	not reported	18:C-T	not reported	1	1	1	1	GAGGTAG	5p	4.76317	2.3902	6.41677	2.52064	0.727159	0.478323	0.707094	0.455392	[W (N)] and [W (T)] and [B/AA (N)] and [B/AA (T)]
let-7g-5p__let-7g__0__0__18MC3M	hsa-let-7g	MI0000433	hsa-let-7g-5p	MIMAT0000414	0	0	52268336	52268357	chr3	-	1	TGAGGTAGTAGTTTGTACCGTT	TGAGGTAGTAGTTTGTACAGTT	not reported	19:A-C	not reported	0	1	0	0	GAGGTAG	5p	1.01785	1.46064	1	2.13885	0.000179147	0.372447	0.0363669	0.181655	[B/AA (T)]
let-7g-5p__let-7g__0__0__22M	hsa-let-7g	MI0000433	hsa-let-7g-5p	MIMAT0000414	0	0	52268336	52268357	chr3	-	0	TGAGGTAGTAGTTTGTACAGTT	TGAGGTAGTAGTTTGTACAGTT	not reported	not reported	not reported	1	1	1	1	GAGGTAG	5p	386.906	323.51	642.706	369.191	0.98119	0.97474	0.978144	0.97277	[W (N)] and [W (T)] and [B/AA (N)] and [B/AA (T)]
let-7g-5p__let-7g__0__0__2MC19M	hsa-let-7g	MI0000433	hsa-let-7g-5p	MIMAT0000414	0	0	52268336	52268357	chr3	-	1	TGCGGTAGTAGTTTGTACAGTT	TGAGGTAGTAGTTTGTACAGTT	not reported	3:A-C	not reported	0	1	0	1	GCGGTAG	5p	1	2.24062	1.019	2.95322	0.0551774	0.550699	0.000179147	0.415084	[W (T)] and [B/AA (T)]
let-7g-5p__let-7g__0__0__2MCT18M	hsa-let-7g	MI0000433	hsa-let-7g-5p	MIMAT0000414	0	0	52268336	52268357	chr3	-	2	TGCTGTAGTAGTTTGTACAGTT	TGAGGTAGTAGTTTGTACAGTT	not reported	3:A-C;4:G-T	not reported	0	1	0	0	GCTGTAG	5p	1	1.95148	1	2.45365	0.000179147	0.460588	0.000179147	0.31942	[B/AA (T)]
let-7g-5p__let-7g__0__0__3MT18M	hsa-let-7g	MI0000433	hsa-let-7g-5p	MIMAT0000414	0	0	52268336	52268357	chr3	-	1	TGATGTAGTAGTTTGTACAGTT	TGAGGTAGTAGTTTGTACAGTT	not reported	4:G-T	not reported	0	1	0	1	GATGTAG	5p	1.13666	3.09483	1.04368	2.49467	0.0725546	0.470978	0.0816912	0.572734	[W (T)] and [B/AA (T)]
let-7i-3p__let-7i__0__-1__21M	hsa-let-7i	MI0000434	hsa-let-7i-3p	MIMAT0004585	0	-1	62603747	62603767	chr12	+	0	CTGCGCAAGCTACTGCCTTGC	CTGCGCAAGCTACTGCCTTGC	not reported	not reported	not reported	1	1	1	1	TGCGCAA	3p	13.221	23.8417	12.5259	24.0407	0.813687	0.876209	0.850054	0.878896	[W (N)] and [W (T)] and [B/AA (N)] and [B/AA (T)]
let-7i-3p__let-7i__0__-2__20M	hsa-let-7i	MI0000434	hsa-let-7i-3p	MIMAT0004585	0	-2	62603747	62603766	chr12	+	0	CTGCGCAAGCTACTGCCTTG	CTGCGCAAGCTACTGCCTTG	not reported	not reported	not reported	1	1	1	1	TGCGCAA	3p	31.763	39.8263	22.8963	37.48	0.868148	0.904873	0.90756	0.909172	[W (N)] and [W (T)] and [B/AA (N)] and [B/AA (T)]
let-7i-3p__let-7i__0__-3__19M	hsa-let-7i	MI0000434	hsa-let-7i-3p	MIMAT0004585	0	-3	62603747	62603765	chr12	+	0	CTGCGCAAGCTACTGCCTT	CTGCGCAAGCTACTGCCTT	not reported	not reported	not reported	1	1	1	1	TGCGCAA	3p	2.68148	2.59841	2.27019	2.24852	0.389108	0.407918	0.530992	0.500717	[W (N)] and [W (T)] and [B/AA (N)] and [B/AA (T)]
let-7i-3p__let-7i__0__0__22M	hsa-let-7i	MI0000434	hsa-let-7i-3p	MIMAT0004585	0	0	62603747	62603768	chr12	+	0	CTGCGCAAGCTACTGCCTTGCT	CTGCGCAAGCTACTGCCTTGCT	not reported	not reported	not reported	1	1	1	1	TGCGCAA	3p	11.0342	24.6128	11.3737	23.5447	0.803475	0.874418	0.832497	0.881584	[W (N)] and [W (T)] and [B/AA (N)] and [B/AA (T)]
let-7i-5p__let-7i__+3__-1__18M	hsa-let-7i	MI0000434	hsa-let-7i-5p	MIMAT0000415	3	-1	62603694	62603711	chr12	+	0	GGTAGTAGTTTGTGCTGT	GGTAGTAGTTTGTGCTGT	not reported	not reported	not reported	1	1	1	1	GTAGTAG	5p	4.21162	3.04397	4.64863	2.27461	0.662128	0.419025	0.682909	0.567359	[W (N)] and [W (T)] and [B/AA (N)] and [B/AA (T)]
let-7i-5p__let-7i__+3__+1__20M	hsa-let-7i	MI0000434	hsa-let-7i-5p	MIMAT0000415	3	1	62603694	62603713	chr12	+	0	GGTAGTAGTTTGTGCTGTTG	GGTAGTAGTTTGTGCTGTTG	not reported	not reported	not reported	1	0	1	1	GTAGTAG	5p	2.42748	2.32017	2.21961	1.95151	0.374776	0.315837	0.484235	0.43479	[W (N)] and [W (T)] and [B/AA (N)]
let-7i-5p__let-7i__+3__0__19M	hsa-let-7i	MI0000434	hsa-let-7i-5p	MIMAT0000415	3	0	62603694	62603712	chr12	+	0	GGTAGTAGTTTGTGCTGTT	GGTAGTAGTTTGTGCTGTT	not reported	not reported	not reported	1	1	1	1	GTAGTAG	5p	3.54318	3.20568	3.5182	2.40591	0.589394	0.45163	0.635614	0.584916	[W (N)] and [W (T)] and [B/AA (N)] and [B/AA (T)]
let-7i-5p__let-7i__+4__-1__17M	hsa-let-7i	MI0000434	hsa-let-7i-5p	MIMAT0000415	4	-1	62603695	62603711	chr12	+	0	GTAGTAGTTTGTGCTGT	GTAGTAGTTTGTGCTGT	not reported	not reported	not reported	1	0	0	0	TAGTAGT	5p	1.82654	1.62775	2.06585	1.4561	0.322823	0.197241	0.29201	0.233966	[B/AA (N)]
let-7i-5p__let-7i__0__-1__21M	hsa-let-7i	MI0000434	hsa-let-7i-5p	MIMAT0000415	0	-1	62603691	62603711	chr12	+	0	TGAGGTAGTAGTTTGTGCTGT	TGAGGTAGTAGTTTGTGCTGT	not reported	not reported	not reported	1	1	1	1	GAGGTAG	5p	118.064	133.955	181.338	137.482	0.96005	0.951451	0.954138	0.951809	[W (N)] and [W (T)] and [B/AA (N)] and [B/AA (T)]
let-7i-5p__let-7i__0__-1__3MT17M	hsa-let-7i	MI0000434	hsa-let-7i-5p	MIMAT0000415	0	-1	62603691	62603711	chr12	+	1	TGATGTAGTAGTTTGTGCTGT	TGAGGTAGTAGTTTGTGCTGT	not reported	4:G-T	not reported	0	0	0	1	GATGTAG	5p	1.06068	2.07495	1.0749	1.63626	0.0833035	0.235579	0.0582229	0.361877	[W (T)]
let-7i-5p__let-7i__0__-2__20M	hsa-let-7i	MI0000434	hsa-let-7i-5p	MIMAT0000415	0	-2	62603691	62603710	chr12	+	0	TGAGGTAGTAGTTTGTGCTG	TGAGGTAGTAGTTTGTGCTG	not reported	not reported	not reported	1	1	1	1	GAGGTAG	5p	11.0011	11.9408	15.8219	12.3984	0.837334	0.821748	0.832318	0.823182	[W (N)] and [W (T)] and [B/AA (N)] and [B/AA (T)]
let-7i-5p__let-7i__0__-3__19M	hsa-let-7i	MI0000434	hsa-let-7i-5p	MIMAT0000415	0	-3	62603691	62603709	chr12	+	0	TGAGGTAGTAGTTTGTGCT	TGAGGTAGTAGTTTGTGCT	not reported	not reported	not reported	1	1	1	1	GAGGTAG	5p	5.33886	5.4321	6.65706	4.71122	0.733966	0.678072	0.72895	0.717664	[W (N)] and [W (T)] and [B/AA (N)] and [B/AA (T)]
let-7i-5p__let-7i__0__-4__18M	hsa-let-7i	MI0000434	hsa-let-7i-5p	MIMAT0000415	0	-4	62603691	62603708	chr12	+	0	TGAGGTAGTAGTTTGTGC	TGAGGTAGTAGTTTGTGC	not reported	not reported	not reported	1	1	1	1	GAGGTAG	5p	2.7098	2.70186	3.5983	2.95245	0.597277	0.55052	0.53565	0.519169	[W (N)] and [W (T)] and [B/AA (N)] and [B/AA (T)]
let-7i-5p__let-7i__0__-5__17M	hsa-let-7i	MI0000434	hsa-let-7i-5p	MIMAT0000415	0	-5	62603691	62603707	chr12	+	0	TGAGGTAGTAGTTTGTG	TGAGGTAGTAGTTTGTG	not reported	not reported	not reported	1	1	1	1	GAGGTAG	5p	4.17412	3.68807	5.52472	4.22685	0.69742	0.657291	0.680939	0.629882	[W (N)] and [W (T)] and [B/AA (N)] and [B/AA (T)]
let-7i-5p__let-7i__0__+1__23M	hsa-let-7i	MI0000434	hsa-let-7i-5p	MIMAT0000415	0	1	62603691	62603713	chr12	+	0	TGAGGTAGTAGTTTGTGCTGTTG	TGAGGTAGTAGTTTGTGCTGTTG	not reported	not reported	not reported	1	1	1	1	GAGGTAG	5p	63.6748	135.048	82.1137	145.128	0.935328	0.952347	0.935686	0.951989	[W (N)] and [W (T)] and [B/AA (N)] and [B/AA (T)]
let-7i-5p__let-7i__0__+1__3MT19M	hsa-let-7i	MI0000434	hsa-let-7i-5p	MIMAT0000415	0	1	62603691	62603713	chr12	+	1	TGATGTAGTAGTTTGTGCTGTTG	TGAGGTAGTAGTTTGTGCTGTTG	not reported	4:G-T	not reported	0	0	0	1	GATGTAG	5p	1.06283	2.31553	1	1.79203	0.000179147	0.276424	0.0589394	0.433178	[W (T)]
let-7i-5p__let-7i__0__+2__21MA1MA	hsa-let-7i	MI0000434	hsa-let-7i-5p	MIMAT0000415	0	2	62603691	62603714	chr12	+	2	TGAGGTAGTAGTTTGTGCTGTAGA	TGAGGTAGTAGTTTGTGCTGTTGG	rs1345172943=24:G-A	22:T-A	not reported	1	1	0	1	GAGGTAG	5p	1.99515	2.93799	2.05859	2.79408	0.319778	0.52741	0.35077	0.554282	[W (T)] and [B/AA (N)] and [B/AA (T)]
let-7i-5p__let-7i__0__+2__23MA	hsa-let-7i	MI0000434	hsa-let-7i-5p	MIMAT0000415	0	2	62603691	62603714	chr12	+	1	TGAGGTAGTAGTTTGTGCTGTTGA	TGAGGTAGTAGTTTGTGCTGTTGG	rs1345172943=24:G-A	not reported	not reported	1	1	1	1	GAGGTAG	5p	8.42025	16.4966	8.62058	16.127	0.769258	0.846829	0.800072	0.850949	[W (N)] and [W (T)] and [B/AA (N)] and [B/AA (T)]
let-7i-5p__let-7i__0__0__22M	hsa-let-7i	MI0000434	hsa-let-7i-5p	MIMAT0000415	0	0	62603691	62603712	chr12	+	0	TGAGGTAGTAGTTTGTGCTGTT	TGAGGTAGTAGTTTGTGCTGTT	not reported	not reported	not reported	1	1	1	1	GAGGTAG	5p	79.6338	103.275	111.136	96.1375	0.947331	0.942315	0.942494	0.945718	[W (N)] and [W (T)] and [B/AA (N)] and [B/AA (T)]
miR-1-3p__mir-1-1__0__-1__21M	hsa-mir-1-1	MI0000651	hsa-miR-1-3p	MIMAT0000416	0	-1	62554351	62554371	chr20	+	0	TGGAATGTAAAGAAGTATGTA	TGGAATGTAAAGAAGTATGTA	not reported	not reported	not reported	1	0	1	0	GGAATGT	3p	3.04362	1.67753	3.51988	1.80176	0.589574	0.279291	0.580975	0.246507	[W (N)] and [B/AA (N)]
miR-1-3p__mir-1-1__0__-2__20M	hsa-mir-1-1	MI0000651	hsa-miR-1-3p	MIMAT0000416	0	-2	62554351	62554370	chr20	+	0	TGGAATGTAAAGAAGTATGT	TGGAATGTAAAGAAGTATGT	not reported	not reported	not reported	1	1	1	1	GGAATGT	3p	5.99876	2.20713	8.01739	2.20421	0.760122	0.396274	0.750448	0.405589	[W (N)] and [W (T)] and [B/AA (N)] and [B/AA (T)]
miR-1-3p__mir-1-1__0__0__22M	hsa-mir-1-1	MI0000651	hsa-miR-1-3p	MIMAT0000416	0	0	62554351	62554372	chr20	+	0	TGGAATGTAAAGAAGTATGTAT	TGGAATGTAAAGAAGTATGTAT	not reported	not reported	not reported	1	1	1	1	GGAATGT	3p	15.0345	5.65459	22.1129	6.5735	0.865281	0.745969	0.860265	0.724651	[W (N)] and [W (T)] and [B/AA (N)] and [B/AA (T)]
miR-100-5p__mir-100__+1__-1__13MC6M	hsa-mir-100	MI0000102	hsa-miR-100-5p	MIMAT0000098	1	-1	122152276	122152295	chr11	-	1	ACCCGTAGATCCGCACTTGT	ACCCGTAGATCCGAACTTGT	not reported	14:A-C	not reported	1	0	0	0	CCCGTAG	5p	1.77469	1.13822	2.331	1.15411	0.40326	0.0772125	0.27517	0.0517736	[B/AA (N)]
miR-100-5p__mir-100__+1__-1__20M	hsa-mir-100	MI0000102	hsa-miR-100-5p	MIMAT0000098	1	-1	122152276	122152295	chr11	-	0	ACCCGTAGATCCGAACTTGT	ACCCGTAGATCCGAACTTGT	not reported	not reported	not reported	1	1	1	1	CCCGTAG	5p	22.2047	38.6243	21.3699	28.7301	0.861698	0.890541	0.886241	0.907023	[W (N)] and [W (T)] and [B/AA (N)] and [B/AA (T)]
miR-100-5p__mir-100__+1__-2__19M	hsa-mir-100	MI0000102	hsa-miR-100-5p	MIMAT0000098	1	-2	122152277	122152295	chr11	-	0	ACCCGTAGATCCGAACTTG	ACCCGTAGATCCGAACTTG	not reported	not reported	not reported	1	1	1	1	CCCGTAG	5p	2.36853	5.19996	2.54371	3.75559	0.455392	0.625045	0.468112	0.706198	[W (N)] and [W (T)] and [B/AA (N)] and [B/AA (T)]
miR-100-5p__mir-100__+1__-3__18M	hsa-mir-100	MI0000102	hsa-miR-100-5p	MIMAT0000098	1	-3	122152278	122152295	chr11	-	0	ACCCGTAGATCCGAACTT	ACCCGTAGATCCGAACTT	not reported	not reported	not reported	0	0	0	1	CCCGTAG	5p	1.3848	2.06557	1.46853	1.97304	0.186851	0.319957	0.152096	0.357578	[W (T)]
miR-100-5p__mir-100__+1__+1__13MC7MA	hsa-mir-100	MI0000102	hsa-miR-100-5p	MIMAT0000098	1	1	122152274	122152295	chr11	-	2	ACCCGTAGATCCGCACTTGTGA	ACCCGTAGATCCGAACTTGTGG	COSV101157468,TCGA,rs771605638=22:G-A	14:A-C	not reported	1	0	1	0	CCCGTAG	5p	2.13523	1.14894	2.39883	1.10014	0.419025	0.0480115	0.40541	0.0587603	[W (N)] and [B/AA (N)]
miR-100-5p__mir-100__+1__+1__21MA	hsa-mir-100	MI0000102	hsa-miR-100-5p	MIMAT0000098	1	1	122152274	122152295	chr11	-	1	ACCCGTAGATCCGAACTTGTGA	ACCCGTAGATCCGAACTTGTGG	COSV101157468,TCGA,rs771605638=22:G-A	not reported	not reported	1	1	1	1	CCCGTAG	5p	30.0369	34.2239	29.4921	26.7271	0.885883	0.884987	0.904515	0.901469	[W (N)] and [W (T)] and [B/AA (N)] and [B/AA (T)]
miR-100-5p__mir-100__+1__0__21M	hsa-mir-100	MI0000102	hsa-miR-100-5p	MIMAT0000098	1	0	122152275	122152295	chr11	-	0	ACCCGTAGATCCGAACTTGTG	ACCCGTAGATCCGAACTTGTG	not reported	not reported	not reported	1	1	1	1	CCCGTAG	5p	5.86257	8.26675	6.02076	6.03208	0.714798	0.731817	0.746507	0.77947	[W (N)] and [W (T)] and [B/AA (N)] and [B/AA (T)]
miR-100-5p__mir-100__+2__-1__19M	hsa-mir-100	MI0000102	hsa-miR-100-5p	MIMAT0000098	2	-1	122152276	122152294	chr11	-	0	CCCGTAGATCCGAACTTGT	CCCGTAGATCCGAACTTGT	not reported	not reported	not reported	0	1	0	1	CCGTAGA	5p	1.75028	4.38214	1.73286	2.70333	0.241311	0.512182	0.266929	0.668578	[W (T)] and [B/AA (T)]
miR-100-5p__mir-100__+2__+1__20MA	hsa-mir-100	MI0000102	hsa-miR-100-5p	MIMAT0000098	2	1	122152274	122152294	chr11	-	1	CCCGTAGATCCGAACTTGTGA	CCCGTAGATCCGAACTTGTGG	COSV101157468,TCGA,rs771605638=21:G-A	not reported	not reported	0	0	0	1	CCGTAGA	5p	1.91094	2.41666	1.75244	1.8334	0.244178	0.286815	0.32139	0.462558	[W (T)]
miR-100-5p__mir-100__+2__0__20M	hsa-mir-100	MI0000102	hsa-miR-100-5p	MIMAT0000098	2	0	122152275	122152294	chr11	-	0	CCCGTAGATCCGAACTTGTG	CCCGTAGATCCGAACTTGTG	not reported	not reported	not reported	0	0	0	1	CCGTAGA	5p	1.41928	3.01539	1.32232	1.9268	0.150484	0.309566	0.161233	0.563239	[W (T)]
miR-100-5p__mir-100__+4__+1__18MA	hsa-mir-100	MI0000102	hsa-miR-100-5p	MIMAT0000098	4	1	122152274	122152292	chr11	-	1	CGTAGATCCGAACTTGTGA	CGTAGATCCGAACTTGTGG	COSV101157468,TCGA,rs771605638=19:G-A	not reported	not reported	0	1	0	1	GTAGATC	5p	1.38823	2.23031	1.38919	2.08998	0.165532	0.35704	0.152992	0.412039	[W (T)] and [B/AA (T)]
miR-100-5p__mir-100__0__-1__11MT9M	hsa-mir-100	MI0000102	hsa-miR-100-5p	MIMAT0000098	0	-1	122152276	122152296	chr11	-	1	AACCCGTAGATTCGAACTTGT	AACCCGTAGATCCGAACTTGT	not reported	12:C-T	not reported	1	1	1	1	ACCCGTA	5p	3.58964	2.8672	4.54489	2.64447	0.655321	0.502329	0.638839	0.544787	[W (N)] and [W (T)] and [B/AA (N)] and [B/AA (T)]
miR-100-5p__mir-100__0__-1__12MA8M	hsa-mir-100	MI0000102	hsa-miR-100-5p	MIMAT0000098	0	-1	122152276	122152296	chr11	-	1	AACCCGTAGATCAGAACTTGT	AACCCGTAGATCCGAACTTGT	rs761222509=13:C-A	not reported	not reported	0	1	0	1	ACCCGTA	5p	1.61307	2.17415	1.93354	2.00605	0.280365	0.327302	0.221247	0.396811	[W (T)] and [B/AA (T)]
miR-100-5p__mir-100__0__-1__12MT8M	hsa-mir-100	MI0000102	hsa-miR-100-5p	MIMAT0000098	0	-1	122152276	122152296	chr11	-	1	AACCCGTAGATCTGAACTTGT	AACCCGTAGATCCGAACTTGT	rs761222509=13:C-T	not reported	not reported	1	1	1	1	ACCCGTA	5p	12.3369	6.38532	9.22353	5.72332	0.778753	0.720172	0.8445	0.745432	[W (N)] and [W (T)] and [B/AA (N)] and [B/AA (T)]
miR-100-5p__mir-100__0__-1__15MC5M	hsa-mir-100	MI0000102	hsa-miR-100-5p	MIMAT0000098	0	-1	122152276	122152296	chr11	-	1	AACCCGTAGATCCGACCTTGT	AACCCGTAGATCCGAACTTGT	not reported	16:A-C	not reported	1	0	1	0	ACCCGTA	5p	3.16419	1.42546	3.88555	1.29745	0.616983	0.142422	0.595844	0.171444	[W (N)] and [B/AA (N)]
miR-100-5p__mir-100__0__-1__16MA4M	hsa-mir-100	MI0000102	hsa-miR-100-5p	MIMAT0000098	0	-1	122152276	122152296	chr11	-	1	AACCCGTAGATCCGAAATTGT	AACCCGTAGATCCGAACTTGT	not reported	17:C-A	not reported	1	1	0	1	ACCCGTA	5p	1.70309	2.01499	2.07859	2.15863	0.32766	0.378359	0.251702	0.341096	[W (T)] and [B/AA (N)] and [B/AA (T)]
miR-100-5p__mir-100__0__-1__16MT4M	hsa-mir-100	MI0000102	hsa-miR-100-5p	MIMAT0000098	0	-1	122152276	122152296	chr11	-	1	AACCCGTAGATCCGAATTTGT	AACCCGTAGATCCGAACTTGT	not reported	17:C-T	not reported	1	1	1	1	ACCCGTA	5p	2.10357	2.05985	2.31102	2.04153	0.399498	0.338767	0.392332	0.356145	[W (N)] and [W (T)] and [B/AA (N)] and [B/AA (T)]
miR-100-5p__mir-100__0__-1__1MC19M	hsa-mir-100	MI0000102	hsa-miR-100-5p	MIMAT0000098	0	-1	122152276	122152296	chr11	-	1	ACCCCGTAGATCCGAACTTGT	AACCCGTAGATCCGAACTTGT	not reported	2:A-C	not reported	1	1	1	1	CCCCGTA	5p	8.19395	2.57587	16.177	2.21546	0.838947	0.399498	0.79613	0.498029	[W (N)] and [W (T)] and [B/AA (N)] and [B/AA (T)]
miR-100-5p__mir-100__0__-1__1MC1MA17M	hsa-mir-100	MI0000102	hsa-miR-100-5p	MIMAT0000098	0	-1	122152276	122152296	chr11	-	2	ACCACGTAGATCCGAACTTGT	AACCCGTAGATCCGAACTTGT	TCGA=4:C-A	2:A-C	not reported	1	0	1	0	CCACGTA	5p	3.3261	1.46259	6.61282	1.3502	0.732533	0.162845	0.614117	0.182372	[W (N)] and [B/AA (N)]
miR-100-5p__mir-100__0__-1__1MT19M	hsa-mir-100	MI0000102	hsa-miR-100-5p	MIMAT0000098	0	-1	122152276	122152296	chr11	-	1	ATCCCGTAGATCCGAACTTGT	AACCCGTAGATCCGAACTTGT	not reported	2:A-T	not reported	0	0	0	1	TCCCGTA	5p	1.27169	2.01841	1.37082	1.89564	0.161412	0.301326	0.11967	0.342888	[W (T)]
miR-100-5p__mir-100__0__-1__1MT1MT17M	hsa-mir-100	MI0000102	hsa-miR-100-5p	MIMAT0000098	0	-1	122152276	122152296	chr11	-	2	ATCTCGTAGATCCGAACTTGT	AACCCGTAGATCCGAACTTGT	TCGA=4:C-T	2:A-T	not reported	1	1	1	1	TCTCGTA	5p	2.22139	2.69545	3.18692	2.79571	0.551594	0.527768	0.43282	0.516482	[W (N)] and [W (T)] and [B/AA (N)] and [B/AA (T)]
miR-100-5p__mir-100__0__-1__21M	hsa-mir-100	MI0000102	hsa-miR-100-5p	MIMAT0000098	0	-1	122152276	122152296	chr11	-	0	AACCCGTAGATCCGAACTTGT	AACCCGTAGATCCGAACTTGT	not reported	not reported	not reported	1	1	1	1	ACCCGTA	5p	4514.58	4913.77	6000.77	4896.2	0.995342	0.99588	0.995342	0.996059	[W (N)] and [W (T)] and [B/AA (N)] and [B/AA (T)]
miR-100-5p__mir-100__0__-1__2MA18M	hsa-mir-100	MI0000102	hsa-miR-100-5p	MIMAT0000098	0	-1	122152276	122152296	chr11	-	1	AAACCGTAGATCCGAACTTGT	AACCCGTAGATCCGAACTTGT	not reported	3:C-A	not reported	1	1	1	1	AACCGTA	5p	2.07905	13.3717	2.56413	14.0912	0.460229	0.83608	0.3823	0.832497	[W (N)] and [W (T)] and [B/AA (N)] and [B/AA (T)]
miR-100-5p__mir-100__0__-1__2MAG17M	hsa-mir-100	MI0000102	hsa-miR-100-5p	MIMAT0000098	0	-1	122152276	122152296	chr11	-	2	AAAGCGTAGATCCGAACTTGT	AACCCGTAGATCCGAACTTGT	not reported	3:C-A;4:C-G	not reported	0	1	0	0	AAGCGTA	5p	1	1.8062	1	2.61131	0.000179147	0.49588	0.000179147	0.278753	[B/AA (T)]
miR-100-5p__mir-100__0__-1__2MG18M	hsa-mir-100	MI0000102	hsa-miR-100-5p	MIMAT0000098	0	-1	122152276	122152296	chr11	-	1	AAGCCGTAGATCCGAACTTGT	AACCCGTAGATCCGAACTTGT	not reported	3:C-G	not reported	1	1	1	1	AGCCGTA	5p	5.01901	2.31794	10.442	2.23276	0.79613	0.40344	0.716768	0.433716	[W (N)] and [W (T)] and [B/AA (N)] and [B/AA (T)]
miR-100-5p__mir-100__0__-1__2MT18M	hsa-mir-100	MI0000102	hsa-miR-100-5p	MIMAT0000098	0	-1	122152276	122152296	chr11	-	1	AATCCGTAGATCCGAACTTGT	AACCCGTAGATCCGAACTTGT	COSV101157509,TCGA=3:C-T	not reported	not reported	1	1	0	1	ATCCGTA	5p	1.95344	2.30346	2.03828	2.01091	0.309925	0.328735	0.337513	0.430491	[W (T)] and [B/AA (N)] and [B/AA (T)]
miR-100-5p__mir-100__0__-1__3MA17M	hsa-mir-100	MI0000102	hsa-miR-100-5p	MIMAT0000098	0	-1	122152276	122152296	chr11	-	1	AACACGTAGATCCGAACTTGT	AACCCGTAGATCCGAACTTGT	TCGA=4:C-A	not reported	not reported	1	1	1	1	ACACGTA	5p	18.7664	2.54767	39.6647	2.26516	0.903977	0.415263	0.876747	0.493013	[W (N)] and [W (T)] and [B/AA (N)] and [B/AA (T)]
miR-100-5p__mir-100__0__-1__3MG17M	hsa-mir-100	MI0000102	hsa-miR-100-5p	MIMAT0000098	0	-1	122152276	122152296	chr11	-	1	AACGCGTAGATCCGAACTTGT	AACCCGTAGATCCGAACTTGT	not reported	4:C-G	not reported	0	1	0	1	ACGCGTA	5p	1.49428	3.06165	1.56322	3.06055	0.208886	0.564135	0.181118	0.568613	[W (T)] and [B/AA (T)]
miR-100-5p__mir-100__0__-1__3MT17M	hsa-mir-100	MI0000102	hsa-miR-100-5p	MIMAT0000098	0	-1	122152276	122152296	chr11	-	1	AACTCGTAGATCCGAACTTGT	AACCCGTAGATCCGAACTTGT	TCGA=4:C-T	not reported	not reported	0	1	0	1	ACTCGTA	5p	1.86649	4.98647	1.71607	6.23396	0.237191	0.73737	0.304729	0.699928	[W (T)] and [B/AA (T)]
miR-100-5p__mir-100__0__-1__4MA16M	hsa-mir-100	MI0000102	hsa-miR-100-5p	MIMAT0000098	0	-1	122152276	122152296	chr11	-	1	AACCAGTAGATCCGAACTTGT	AACCCGTAGATCCGAACTTGT	not reported	5:C-A	not reported	1	1	1	0	ACCAGTA	5p	2.24893	1.92786	3.24572	3.15766	0.559656	0.575421	0.439807	0.312433	[W (N)] and [B/AA (N)] and [B/AA (T)]
miR-100-5p__mir-100__0__-1__4MT16M	hsa-mir-100	MI0000102	hsa-miR-100-5p	MIMAT0000098	0	-1	122152276	122152296	chr11	-	1	AACCTGTAGATCCGAACTTGT	AACCCGTAGATCCGAACTTGT	COSV66115376,rs1200346714=5:C-T	not reported	not reported	1	1	1	1	ACCTGTA	5p	2.82826	2.52604	3.21737	2.20754	0.555894	0.397707	0.551415	0.489251	[W (N)] and [W (T)] and [B/AA (N)] and [B/AA (T)]
miR-100-5p__mir-100__0__-1__5MT15M	hsa-mir-100	MI0000102	hsa-miR-100-5p	MIMAT0000098	0	-1	122152276	122152296	chr11	-	1	AACCCTTAGATCCGAACTTGT	AACCCGTAGATCCGAACTTGT	TCGA=6:G-T	not reported	not reported	1	0	0	0	ACCCTTA	5p	1.86225	1.69784	2.09936	1.62141	0.33608	0.233071	0.303655	0.250627	[B/AA (N)]
miR-100-5p__mir-100__0__-1__7MG13M	hsa-mir-100	MI0000102	hsa-miR-100-5p	MIMAT0000098	0	-1	122152276	122152296	chr11	-	1	AACCCGTGGATCCGAACTTGT	AACCCGTAGATCCGAACTTGT	not reported	not reported	26028588=8:A-G	1	0	0	0	ACCCGTG	5p	1.54161	1.53605	2.2561	1.58085	0.385346	0.225188	0.196883	0.206736	[B/AA (N)]
miR-100-5p__mir-100__0__-1__8MT12M	hsa-mir-100	MI0000102	hsa-miR-100-5p	MIMAT0000098	0	-1	122152276	122152296	chr11	-	1	AACCCGTATATCCGAACTTGT	AACCCGTAGATCCGAACTTGT	not reported	9:G-T	not reported	1	0	1	0	ACCCGTA	5p	2.14364	1.693	2.45104	1.64214	0.431566	0.237191	0.408993	0.249731	[W (N)] and [B/AA (N)]
miR-100-5p__mir-100__0__-1__9MC11M	hsa-mir-100	MI0000102	hsa-miR-100-5p	MIMAT0000098	0	-1	122152276	122152296	chr11	-	1	AACCCGTAGCTCCGAACTTGT	AACCCGTAGATCCGAACTTGT	not reported	10:A-C	not reported	0	0	1	0	ACCCGTA	5p	2.21318	1.12831	1.08247	1.03885	0.0854532	0.0143318	0.430312	0.047474	[W (N)]
miR-100-5p__mir-100__0__-1__G20M	hsa-mir-100	MI0000102	hsa-miR-100-5p	MIMAT0000098	0	-1	122152276	122152296	chr11	-	1	GACCCGTAGATCCGAACTTGT	AACCCGTAGATCCGAACTTGT	not reported	not reported	22499667,25582055,25692236,26028588,28550310,29233923,29267965=1:A-G	1	1	1	1	ACCCGTA	5p	12.3481	4.80732	16.3804	4.95371	0.84038	0.688642	0.844679	0.6933	[W (N)] and [W (T)] and [B/AA (N)] and [B/AA (T)]
miR-100-5p__mir-100__0__-2__12MT7M	hsa-mir-100	MI0000102	hsa-miR-100-5p	MIMAT0000098	0	-2	122152277	122152296	chr11	-	1	AACCCGTAGATCTGAACTTG	AACCCGTAGATCCGAACTTG	rs761222509=13:C-T	not reported	not reported	1	1	1	1	ACCCGTA	5p	4.91314	2.38511	5.35253	2.23078	0.690792	0.402723	0.713185	0.454855	[W (N)] and [W (T)] and [B/AA (N)] and [B/AA (T)]
miR-100-5p__mir-100__0__-2__1MC18M	hsa-mir-100	MI0000102	hsa-miR-100-5p	MIMAT0000098	0	-2	122152277	122152296	chr11	-	1	ACCCCGTAGATCCGAACTTG	AACCCGTAGATCCGAACTTG	not reported	2:A-C	not reported	1	0	0	0	CCCCGTA	5p	1.86511	1.25518	2.68013	1.20931	0.47904	0.105339	0.304371	0.10928	[B/AA (N)]
miR-100-5p__mir-100__0__-2__20M	hsa-mir-100	MI0000102	hsa-miR-100-5p	MIMAT0000098	0	-2	122152277	122152296	chr11	-	0	AACCCGTAGATCCGAACTTG	AACCCGTAGATCCGAACTTG	not reported	not reported	not reported	1	1	1	1	ACCCGTA	5p	274.737	260.563	359.875	241.799	0.971157	0.965783	0.972232	0.968649	[W (N)] and [W (T)] and [B/AA (N)] and [B/AA (T)]
miR-100-5p__mir-100__0__-2__2MA17M	hsa-mir-100	MI0000102	hsa-miR-100-5p	MIMAT0000098	0	-2	122152277	122152296	chr11	-	1	AAACCGTAGATCCGAACTTG	AACCCGTAGATCCGAACTTG	not reported	3:C-A	not reported	0	1	0	1	AACCGTA	5p	1.10543	2.56084	1.09274	2.41534	0.087603	0.453959	0.0732712	0.495521	[W (T)] and [B/AA (T)]
miR-100-5p__mir-100__0__-2__2MG17M	hsa-mir-100	MI0000102	hsa-miR-100-5p	MIMAT0000098	0	-2	122152277	122152296	chr11	-	1	AAGCCGTAGATCCGAACTTG	AACCCGTAGATCCGAACTTG	not reported	3:C-G	not reported	1	0	1	0	AGCCGTA	5p	2.40051	1.48339	4.27642	1.6756	0.64081	0.247761	0.475457	0.190971	[W (N)] and [B/AA (N)]
miR-100-5p__mir-100__0__-2__3MA16M	hsa-mir-100	MI0000102	hsa-miR-100-5p	MIMAT0000098	0	-2	122152277	122152296	chr11	-	1	AACACGTAGATCCGAACTTG	AACCCGTAGATCCGAACTTG	TCGA=4:C-A	not reported	not reported	1	0	1	0	ACACGTA	5p	3.25085	1.28282	5.29168	1.22657	0.688821	0.113938	0.605697	0.11967	[W (N)] and [B/AA (N)]
miR-100-5p__mir-100__0__-2__G19M	hsa-mir-100	MI0000102	hsa-miR-100-5p	MIMAT0000098	0	-2	122152277	122152296	chr11	-	1	GACCCGTAGATCCGAACTTG	AACCCGTAGATCCGAACTTG	not reported	not reported	22499667,25582055,25692236,26028588,28550310,29233923,29267965=1:A-G	1	0	0	0	ACCCGTA	5p	1.75818	1.21486	2.0143	1.20666	0.299534	0.10498	0.269437	0.0926191	[B/AA (N)]
miR-100-5p__mir-100__0__-3__19M	hsa-mir-100	MI0000102	hsa-miR-100-5p	MIMAT0000098	0	-3	122152278	122152296	chr11	-	0	AACCCGTAGATCCGAACTT	AACCCGTAGATCCGAACTT	not reported	not reported	not reported	1	1	1	1	ACCCGTA	5p	71.8423	71.7601	102.509	68.7614	0.943569	0.930312	0.939807	0.934432	[W (N)] and [W (T)] and [B/AA (N)] and [B/AA (T)]
miR-100-5p__mir-100__0__-4__18M	hsa-mir-100	MI0000102	hsa-miR-100-5p	MIMAT0000098	0	-4	122152279	122152296	chr11	-	0	AACCCGTAGATCCGAACT	AACCCGTAGATCCGAACT	not reported	not reported	not reported	1	1	1	1	ACCCGTA	5p	17.8086	17.6917	23.3622	15.6017	0.86976	0.8445	0.873701	0.85507	[W (N)] and [W (T)] and [B/AA (N)] and [B/AA (T)]
miR-100-5p__mir-100__0__-5__17M	hsa-mir-100	MI0000102	hsa-miR-100-5p	MIMAT0000098	0	-5	122152280	122152296	chr11	-	0	AACCCGTAGATCCGAAC	AACCCGTAGATCCGAAC	not reported	not reported	not reported	1	1	1	1	ACCCGTA	5p	15.2927	16.1547	19.7128	17.261	0.855786	0.852204	0.862236	0.849337	[W (N)] and [W (T)] and [B/AA (N)] and [B/AA (T)]
miR-100-5p__mir-100__0__-6__16M	hsa-mir-100	MI0000102	hsa-miR-100-5p	MIMAT0000098	0	-6	122152281	122152296	chr11	-	0	AACCCGTAGATCCGAA	AACCCGTAGATCCGAA	not reported	not reported	not reported	1	1	1	1	ACCCGTA	5p	11.7541	21.1594	16.0157	17.5327	0.83823	0.853637	0.839126	0.869939	[W (N)] and [W (T)] and [B/AA (N)] and [B/AA (T)]
miR-100-5p__mir-100__0__+1__12MT9MA	hsa-mir-100	MI0000102	hsa-miR-100-5p	MIMAT0000098	0	1	122152274	122152296	chr11	-	2	AACCCGTAGATCTGAACTTGTGA	AACCCGTAGATCCGAACTTGTGG	rs761222509=13:C-T;COSV101157468,TCGA,rs771605638=23:G-A	not reported	not reported	1	1	1	1	ACCCGTA	5p	3.573	2.50935	3.33489	2.32035	0.569509	0.431387	0.637764	0.485131	[W (N)] and [W (T)] and [B/AA (N)] and [B/AA (T)]
miR-100-5p__mir-100__0__+1__19MT2MA	hsa-mir-100	MI0000102	hsa-miR-100-5p	MIMAT0000098	0	1	122152274	122152296	chr11	-	2	AACCCGTAGATCCGAACTTTTGA	AACCCGTAGATCCGAACTTGTGG	COSV101157468,TCGA,rs771605638=23:G-A	20:G-T	not reported	1	0	1	0	ACCCGTA	5p	2.03459	1.63138	2.47106	1.57567	0.437478	0.223576	0.364027	0.234683	[W (N)] and [B/AA (N)]
miR-100-5p__mir-100__0__+1__1MC1MA18MA	hsa-mir-100	MI0000102	hsa-miR-100-5p	MIMAT0000098	0	1	122152274	122152296	chr11	-	3	ACCACGTAGATCCGAACTTGTGA	AACCCGTAGATCCGAACTTGTGG	TCGA=4:C-A;COSV101157468,TCGA,rs771605638=23:G-A	2:A-C	not reported	1	0	1	0	CCACGTA	5p	2.6035	1.30351	4.2306	1.21668	0.638481	0.109101	0.517198	0.129882	[W (N)] and [B/AA (N)]
miR-100-5p__mir-100__0__+1__1MC20MA	hsa-mir-100	MI0000102	hsa-miR-100-5p	MIMAT0000098	0	1	122152274	122152296	chr11	-	2	ACCCCGTAGATCCGAACTTGTGA	AACCCGTAGATCCGAACTTGTGG	COSV101157468,TCGA,rs771605638=23:G-A	2:A-C	not reported	1	0	1	1	CCCCGTA	5p	5.59161	2.12409	8.95867	1.8152	0.774991	0.282515	0.737191	0.378717	[W (N)] and [W (T)] and [B/AA (N)]
miR-100-5p__mir-100__0__+1__1MT1MT18MA	hsa-mir-100	MI0000102	hsa-miR-100-5p	MIMAT0000098	0	1	122152274	122152296	chr11	-	3	ATCTCGTAGATCCGAACTTGTGA	AACCCGTAGATCCGAACTTGTGG	TCGA=4:C-T;COSV101157468,TCGA,rs771605638=23:G-A	2:A-T	not reported	1	1	0	1	TCTCGTA	5p	1.59089	2.09917	2.13911	2.38015	0.348441	0.447331	0.213544	0.369939	[W (T)] and [B/AA (N)] and [B/AA (T)]
miR-100-5p__mir-100__0__+1__21MA1M	hsa-mir-100	MI0000102	hsa-miR-100-5p	MIMAT0000098	0	1	122152274	122152296	chr11	-	1	AACCCGTAGATCCGAACTTGTAG	AACCCGTAGATCCGAACTTGTGG	rs775920236=22:G-A	not reported	not reported	1	0	1	0	ACCCGTA	5p	2.3438	1.96832	2.13248	1.78862	0.34665	0.275887	0.461662	0.32354	[W (N)] and [B/AA (N)]
miR-100-5p__mir-100__0__+1__21MAA	hsa-mir-100	MI0000102	hsa-miR-100-5p	MIMAT0000098	0	1	122152274	122152296	chr11	-	2	AACCCGTAGATCCGAACTTGTAA	AACCCGTAGATCCGAACTTGTGG	rs775920236=22:G-A;COSV101157468,TCGA,rs771605638=23:G-A	not reported	not reported	1	1	1	1	ACCCGTA	5p	7.97523	6.37687	9.56598	5.8724	0.78574	0.726263	0.791652	0.744715	[W (N)] and [W (T)] and [B/AA (N)] and [B/AA (T)]
miR-100-5p__mir-100__0__+1__22MA	hsa-mir-100	MI0000102	hsa-miR-100-5p	MIMAT0000098	0	1	122152274	122152296	chr11	-	1	AACCCGTAGATCCGAACTTGTGA	AACCCGTAGATCCGAACTTGTGG	COSV101157468,TCGA,rs771605638=23:G-A	not reported	not reported	1	1	1	1	ACCCGTA	5p	3036.29	3158.76	3295.8	3161.47	0.993192	0.994984	0.993909	0.994626	[W (N)] and [W (T)] and [B/AA (N)] and [B/AA (T)]
miR-100-5p__mir-100__0__+1__23M	hsa-mir-100	MI0000102	hsa-miR-100-5p	MIMAT0000098	0	1	122152274	122152296	chr11	-	0	AACCCGTAGATCCGAACTTGTGG	AACCCGTAGATCCGAACTTGTGG	not reported	not reported	not reported	1	1	1	1	ACCCGTA	5p	3.89157	5.38878	4.04907	7.79761	0.625582	0.767467	0.661591	0.714977	[W (N)] and [W (T)] and [B/AA (N)] and [B/AA (T)]
miR-100-5p__mir-100__0__+1__2MA19MA	hsa-mir-100	MI0000102	hsa-miR-100-5p	MIMAT0000098	0	1	122152274	122152296	chr11	-	2	AAACCGTAGATCCGAACTTGTGA	AACCCGTAGATCCGAACTTGTGG	COSV101157468,TCGA,rs771605638=23:G-A	3:C-A	not reported	0	1	0	1	AACCGTA	5p	1.50988	9.63571	1.54218	10.598	0.202795	0.804013	0.185776	0.799534	[W (T)] and [B/AA (T)]
miR-100-5p__mir-100__0__+1__2MAG18MA	hsa-mir-100	MI0000102	hsa-miR-100-5p	MIMAT0000098	0	1	122152274	122152296	chr11	-	3	AAAGCGTAGATCCGAACTTGTGA	AACCCGTAGATCCGAACTTGTGG	COSV101157468,TCGA,rs771605638=23:G-A	3:C-A;4:C-G	not reported	0	1	0	0	AAGCGTA	5p	1	1.55464	1	2.19307	0.000179147	0.39287	0.000179147	0.213006	[B/AA (T)]
miR-100-5p__mir-100__0__+1__2MG19MA	hsa-mir-100	MI0000102	hsa-miR-100-5p	MIMAT0000098	0	1	122152274	122152296	chr11	-	2	AAGCCGTAGATCCGAACTTGTGA	AACCCGTAGATCCGAACTTGTGG	COSV101157468,TCGA,rs771605638=23:G-A	3:C-G	not reported	1	0	1	0	AGCCGTA	5p	4.10676	1.77631	7.17582	1.74157	0.746327	0.264421	0.676102	0.272125	[W (N)] and [B/AA (N)]
miR-100-5p__mir-100__0__+1__3MA18MA	hsa-mir-100	MI0000102	hsa-miR-100-5p	MIMAT0000098	0	1	122152274	122152296	chr11	-	2	AACACGTAGATCCGAACTTGTGA	AACCCGTAGATCCGAACTTGTGG	TCGA=4:C-A;COSV101157468,TCGA,rs771605638=23:G-A	not reported	not reported	1	0	1	0	ACACGTA	5p	12.4313	1.99272	21.3785	1.76835	0.861877	0.271229	0.845396	0.32981	[W (N)] and [B/AA (N)]
miR-100-5p__mir-100__0__+1__3MG18MA	hsa-mir-100	MI0000102	hsa-miR-100-5p	MIMAT0000098	0	1	122152274	122152296	chr11	-	2	AACGCGTAGATCCGAACTTGTGA	AACCCGTAGATCCGAACTTGTGG	COSV101157468,TCGA,rs771605638=23:G-A	4:C-G	not reported	0	1	0	1	ACGCGTA	5p	1.25843	2.36133	1.18279	2.3189	0.116267	0.430491	0.113938	0.448226	[W (T)] and [B/AA (T)]
miR-100-5p__mir-100__0__+1__3MT18MA	hsa-mir-100	MI0000102	hsa-miR-100-5p	MIMAT0000098	0	1	122152274	122152296	chr11	-	2	AACTCGTAGATCCGAACTTGTGA	AACCCGTAGATCCGAACTTGTGG	TCGA=4:C-T;COSV101157468,TCGA,rs771605638=23:G-A	not reported	not reported	0	1	0	1	ACTCGTA	5p	1.35975	3.65933	1.70357	4.29901	0.234683	0.66177	0.145647	0.626836	[W (T)] and [B/AA (T)]
miR-100-5p__mir-100__0__+1__4MA17MA	hsa-mir-100	MI0000102	hsa-miR-100-5p	MIMAT0000098	0	1	122152274	122152296	chr11	-	2	AACCAGTAGATCCGAACTTGTGA	AACCCGTAGATCCGAACTTGTGG	COSV101157468,TCGA,rs771605638=23:G-A	5:C-A	not reported	0	1	0	0	ACCAGTA	5p	1.59088	1.46317	1.65417	2.247	0.225546	0.407023	0.213364	0.18273	[B/AA (T)]
miR-100-5p__mir-100__0__+1__9MC12MA	hsa-mir-100	MI0000102	hsa-miR-100-5p	MIMAT0000098	0	1	122152274	122152296	chr11	-	2	AACCCGTAGCTCCGAACTTGTGA	AACCCGTAGATCCGAACTTGTGG	COSV101157468,TCGA,rs771605638=23:G-A	10:A-C	not reported	0	0	1	0	ACCCGTA	5p	2.39213	1.06556	1.03577	1.02188	0.063239	0.00716589	0.472949	0.0155858	[W (N)]
miR-100-5p__mir-100__0__+1__G21MA	hsa-mir-100	MI0000102	hsa-miR-100-5p	MIMAT0000098	0	1	122152274	122152296	chr11	-	2	GACCCGTAGATCCGAACTTGTGA	AACCCGTAGATCCGAACTTGTGG	COSV101157468,TCGA,rs771605638=23:G-A	not reported	22499667,25582055,25692236,26028588,28550310,29233923,29267965=1:A-G	1	1	1	1	ACCCGTA	5p	8.24607	3.40817	9.82626	3.41626	0.788965	0.599606	0.797564	0.604622	[W (N)] and [W (T)] and [B/AA (N)] and [B/AA (T)]
miR-100-5p__mir-100__0__+2__22MA1M	hsa-mir-100	MI0000102	hsa-miR-100-5p	MIMAT0000098	0	2	122152273	122152296	chr11	-	1	AACCCGTAGATCCGAACTTGTGAT	AACCCGTAGATCCGAACTTGTGGT	COSV101157468,TCGA,rs771605638=23:G-A	not reported	not reported	0	1	0	1	ACCCGTA	5p	1.58303	2.33978	1.79012	2.37152	0.251344	0.444464	0.211215	0.442494	[W (T)] and [B/AA (T)]
miR-100-5p__mir-100__0__+2__24M	hsa-mir-100	MI0000102	hsa-miR-100-5p	MIMAT0000098	0	2	122152273	122152296	chr11	-	0	AACCCGTAGATCCGAACTTGTGGT	AACCCGTAGATCCGAACTTGTGGT	not reported	not reported	not reported	0	1	0	1	ACCCGTA	5p	1.33394	2.03345	1.30125	2.50709	0.144751	0.474919	0.138481	0.350054	[W (T)] and [B/AA (T)]
miR-100-5p__mir-100__0__0__12MT9M	hsa-mir-100	MI0000102	hsa-miR-100-5p	MIMAT0000098	0	0	122152275	122152296	chr11	-	1	AACCCGTAGATCTGAACTTGTG	AACCCGTAGATCCGAACTTGTG	rs761222509=13:C-T	not reported	not reported	1	1	1	1	ACCCGTA	5p	9.11886	4.75461	6.74651	4.51142	0.736474	0.669832	0.811358	0.690254	[W (N)] and [W (T)] and [B/AA (N)] and [B/AA (T)]
miR-100-5p__mir-100__0__0__1MC20M	hsa-mir-100	MI0000102	hsa-miR-100-5p	MIMAT0000098	0	0	122152275	122152296	chr11	-	1	ACCCCGTAGATCCGAACTTGTG	AACCCGTAGATCCGAACTTGTG	not reported	2:A-C	not reported	1	0	1	0	CCCCGTA	5p	2.32517	1.40876	3.05312	1.34669	0.537621	0.161233	0.457721	0.167861	[W (N)] and [B/AA (N)]
miR-100-5p__mir-100__0__0__21MA	hsa-mir-100	MI0000102	hsa-miR-100-5p	MIMAT0000098	0	0	122152275	122152296	chr11	-	1	AACCCGTAGATCCGAACTTGTA	AACCCGTAGATCCGAACTTGTG	rs775920236=22:G-A	not reported	not reported	1	1	1	1	ACCCGTA	5p	34.3276	26.3568	44.8312	24.2074	0.909531	0.876568	0.91168	0.886779	[W (N)] and [W (T)] and [B/AA (N)] and [B/AA (T)]
miR-100-5p__mir-100__0__0__22M	hsa-mir-100	MI0000102	hsa-miR-100-5p	MIMAT0000098	0	0	122152275	122152296	chr11	-	0	AACCCGTAGATCCGAACTTGTG	AACCCGTAGATCCGAACTTGTG	not reported	not reported	not reported	1	1	1	1	ACCCGTA	5p	688.767	808.771	793.679	810.796	0.984414	0.984772	0.984772	0.984952	[W (N)] and [W (T)] and [B/AA (N)] and [B/AA (T)]
miR-100-5p__mir-100__0__0__2MA19M	hsa-mir-100	MI0000102	hsa-miR-100-5p	MIMAT0000098	0	0	122152275	122152296	chr11	-	1	AAACCGTAGATCCGAACTTGTG	AACCCGTAGATCCGAACTTGTG	not reported	3:C-A	not reported	0	1	0	1	AACCGTA	5p	1.26079	4.05262	1.32426	3.965	0.1512	0.640093	0.114654	0.652813	[W (T)] and [B/AA (T)]
miR-100-5p__mir-100__0__0__2MG19M	hsa-mir-100	MI0000102	hsa-miR-100-5p	MIMAT0000098	0	0	122152275	122152296	chr11	-	1	AAGCCGTAGATCCGAACTTGTG	AACCCGTAGATCCGAACTTGTG	not reported	3:C-G	not reported	1	0	0	0	AGCCGTA	5p	1.94157	1.32675	3.077	1.25895	0.540129	0.127911	0.333572	0.138839	[B/AA (N)]
miR-100-5p__mir-100__0__0__3MA18M	hsa-mir-100	MI0000102	hsa-miR-100-5p	MIMAT0000098	0	0	122152275	122152296	chr11	-	1	AACACGTAGATCCGAACTTGTG	AACCCGTAGATCCGAACTTGTG	TCGA=4:C-A	not reported	not reported	1	0	1	0	ACACGTA	5p	4.24101	1.4329	5.44843	1.36079	0.694016	0.166249	0.684522	0.173773	[W (N)] and [B/AA (N)]
miR-100-5p__mir-100__0__0__3MT18M	hsa-mir-100	MI0000102	hsa-miR-100-5p	MIMAT0000098	0	0	122152275	122152296	chr11	-	1	AACTCGTAGATCCGAACTTGTG	AACCCGTAGATCCGAACTTGTG	TCGA=4:C-T	not reported	not reported	0	1	0	1	ACTCGTA	5p	1.14846	2.05189	1.15509	2.30853	0.107847	0.427983	0.0849158	0.354174	[W (T)] and [B/AA (T)]
miR-100-5p__mir-100__0__0__G21M	hsa-mir-100	MI0000102	hsa-miR-100-5p	MIMAT0000098	0	0	122152275	122152296	chr11	-	1	GACCCGTAGATCCGAACTTGTG	AACCCGTAGATCCGAACTTGTG	not reported	not reported	22499667,25582055,25692236,26028588,28550310,29233923,29267965=1:A-G	1	0	1	0	ACCCGTA	5p	2.9853	1.69937	3.28622	1.65324	0.563239	0.240953	0.574346	0.251344	[W (N)] and [B/AA (N)]
miR-101-3p__mir-101-1__-1__-1__13MC1MC5M	hsa-mir-101-1	MI0000103	hsa-miR-101-3p	MIMAT0000099	-1	-1	65058443	65058463	chr1	-	2	GTACAGTACTGTGCTCACTGA	GTACAGTACTGTGATAACTGA	not reported	14:A-C;16:A-C	not reported	0	0	1	0	TACAGTA	3p	2.222	1.00339	1.94815	1.00554	0.282157	0.00197062	0.432999	0.000358295	[W (N)]
miR-101-3p__mir-101-1__-1__-1__13MC7M	hsa-mir-101-1	MI0000103	hsa-miR-101-3p	MIMAT0000099	-1	-1	65058443	65058463	chr1	-	1	GTACAGTACTGTGCTAACTGA	GTACAGTACTGTGATAACTGA	not reported	14:A-C	not reported	1	0	1	1	TACAGTA	3p	47.9283	2.31797	140.487	1.90868	0.953601	0.304729	0.9244	0.433895	[W (N)] and [W (T)] and [B/AA (N)]
miR-101-3p__mir-101-1__-1__-1__15MC5M	hsa-mir-101-1	MI0000103	hsa-miR-101-3p	MIMAT0000099	-1	-1	65058443	65058463	chr1	-	1	GTACAGTACTGTGATCACTGA	GTACAGTACTGTGATAACTGA	not reported	16:A-C	not reported	1	0	1	0	TACAGTA	3p	2.13671	1.23041	2.23174	1.24875	0.378896	0.121999	0.405948	0.0994267	[W (N)] and [B/AA (N)]
miR-101-3p__mir-101-1__-1__-1__16MC4M	hsa-mir-101-1	MI0000103	hsa-miR-101-3p	MIMAT0000099	-1	-1	65058443	65058463	chr1	-	1	GTACAGTACTGTGATACCTGA	GTACAGTACTGTGATAACTGA	not reported	17:A-C	not reported	0	1	0	0	TACAGTA	3p	1.05744	1.70661	1.06626	2.13781	0.0775708	0.372089	0.0560731	0.253493	[B/AA (T)]
miR-101-3p__mir-101-1__-1__-1__18MC2M	hsa-mir-101-1	MI0000103	hsa-miR-101-3p	MIMAT0000099	-1	-1	65058443	65058463	chr1	-	1	GTACAGTACTGTGATAACCGA	GTACAGTACTGTGATAACTGA	not reported	19:T-C	not reported	1	0	0	0	TACAGTA	3p	1.46611	1.4444	2.00323	1.43745	0.294518	0.191867	0.173594	0.176281	[B/AA (N)]
miR-101-3p__mir-101-1__-1__-1__1MA19M	hsa-mir-101-1	MI0000103	hsa-miR-101-3p	MIMAT0000099	-1	-1	65058443	65058463	chr1	-	1	GAACAGTACTGTGATAACTGA	GTACAGTACTGTGATAACTGA	not reported	2:T-A	not reported	1	0	1	0	AACAGTA	3p	2.45067	1.37063	3.80376	1.27109	0.613042	0.132569	0.487639	0.154246	[W (N)] and [B/AA (N)]
miR-101-3p__mir-101-1__-1__-1__1MAG18M	hsa-mir-101-1	MI0000103	hsa-miR-101-3p	MIMAT0000099	-1	-1	65058443	65058463	chr1	-	2	GAGCAGTACTGTGATAACTGA	GTACAGTACTGTGATAACTGA	not reported	2:T-A;3:A-G	not reported	1	0	1	0	AGCAGTA	3p	2.72964	1.24597	4.98142	1.20383	0.677356	0.102114	0.539771	0.10498	[W (N)] and [B/AA (N)]
miR-101-3p__mir-101-1__-1__-1__1MC19M	hsa-mir-101-1	MI0000103	hsa-miR-101-3p	MIMAT0000099	-1	-1	65058443	65058463	chr1	-	1	GCACAGTACTGTGATAACTGA	GTACAGTACTGTGATAACTGA	not reported	2:T-C	not reported	1	0	0	0	CACAGTA	3p	1.70376	1.57839	2.39994	1.44201	0.419384	0.193658	0.25206	0.220172	[B/AA (N)]
miR-101-3p__mir-101-1__-1__-1__1MG19M	hsa-mir-101-1	MI0000103	hsa-miR-101-3p	MIMAT0000099	-1	-1	65058443	65058463	chr1	-	1	GGACAGTACTGTGATAACTGA	GTACAGTACTGTGATAACTGA	not reported	2:T-G	not reported	1	1	0	1	GACAGTA	3p	1.95459	3.66611	2.08332	3.67908	0.329989	0.620387	0.338409	0.627732	[W (T)] and [B/AA (N)] and [B/AA (T)]
miR-101-3p__mir-101-1__-1__-1__1MGC18M	hsa-mir-101-1	MI0000103	hsa-miR-101-3p	MIMAT0000099	-1	-1	65058443	65058463	chr1	-	2	GGCCAGTACTGTGATAACTGA	GTACAGTACTGTGATAACTGA	not reported	2:T-G;3:A-C	not reported	0	1	0	1	GCCAGTA	3p	1	2.32704	1	2.56343	0.000179147	0.486564	0.000179147	0.437836	[W (T)] and [B/AA (T)]
miR-101-3p__mir-101-1__-1__-1__21M	hsa-mir-101-1	MI0000103	hsa-miR-101-3p	MIMAT0000099	-1	-1	65058443	65058463	chr1	-	0	GTACAGTACTGTGATAACTGA	GTACAGTACTGTGATAACTGA	not reported	not reported	not reported	1	1	1	1	TACAGTA	3p	1558.19	2342.45	3932.63	2293.6	0.994267	0.993192	0.991938	0.993372	[W (N)] and [W (T)] and [B/AA (N)] and [B/AA (T)]
miR-101-3p__mir-101-1__-1__-1__2MC18M	hsa-mir-101-1	MI0000103	hsa-miR-101-3p	MIMAT0000099	-1	-1	65058443	65058463	chr1	-	1	GTCCAGTACTGTGATAACTGA	GTACAGTACTGTGATAACTGA	not reported	3:A-C	not reported	0	1	0	1	TCCAGTA	3p	1.02653	18.9861	1	27.7237	0.000179147	0.887675	0.0424579	0.861698	[W (T)] and [B/AA (T)]
miR-101-3p__mir-101-1__-1__-1__2MC1MC16M	hsa-mir-101-1	MI0000103	hsa-miR-101-3p	MIMAT0000099	-1	-1	65058443	65058463	chr1	-	2	GTCCCGTACTGTGATAACTGA	GTACAGTACTGTGATAACTGA	not reported	3:A-C;5:A-C	not reported	0	1	0	0	TCCCGTA	3p	1	1.11982	1	3.00724	0.000179147	0.557506	0.000179147	0.0433536	[B/AA (T)]
miR-101-3p__mir-101-1__-1__-1__2MCT17M	hsa-mir-101-1	MI0000103	hsa-miR-101-3p	MIMAT0000099	-1	-1	65058443	65058463	chr1	-	2	GTCTAGTACTGTGATAACTGA	GTACAGTACTGTGATAACTGA	not reported	3:A-C;4:C-T	not reported	0	1	0	1	TCTAGTA	3p	1	2.11785	1	2.2916	0.000179147	0.423504	0.000179147	0.375851	[W (T)] and [B/AA (T)]
miR-101-3p__mir-101-1__-1__-1__2MT18M	hsa-mir-101-1	MI0000103	hsa-miR-101-3p	MIMAT0000099	-1	-1	65058443	65058463	chr1	-	1	GTTCAGTACTGTGATAACTGA	GTACAGTACTGTGATAACTGA	not reported	3:A-T	not reported	1	0	0	0	TTCAGTA	3p	1.67335	1.28402	2.17517	1.26583	0.361877	0.13024	0.243461	0.120029	[B/AA (N)]
miR-101-3p__mir-101-1__-1__-1__3MA17M	hsa-mir-101-1	MI0000103	hsa-miR-101-3p	MIMAT0000099	-1	-1	65058443	65058463	chr1	-	1	GTAAAGTACTGTGATAACTGA	GTACAGTACTGTGATAACTGA	not reported	4:C-A	not reported	1	1	1	1	TAAAGTA	3p	37.0038	3.88483	114.031	3.28176	0.947689	0.587782	0.914905	0.642422	[W (N)] and [W (T)] and [B/AA (N)] and [B/AA (T)]
miR-101-3p__mir-101-1__-1__-1__3MA9MC7M	hsa-mir-101-1	MI0000103	hsa-miR-101-3p	MIMAT0000099	-1	-1	65058443	65058463	chr1	-	2	GTAAAGTACTGTGCTAACTGA	GTACAGTACTGTGATAACTGA	not reported	4:C-A;14:A-C	not reported	1	0	1	0	TAAAGTA	3p	2.13229	1.03688	2.61421	1.06393	0.469724	0.0272304	0.404156	0.00770333	[W (N)] and [B/AA (N)]
miR-101-3p__mir-101-1__-1__-1__3MG17M	hsa-mir-101-1	MI0000103	hsa-miR-101-3p	MIMAT0000099	-1	-1	65058443	65058463	chr1	-	1	GTAGAGTACTGTGATAACTGA	GTACAGTACTGTGATAACTGA	not reported	4:C-G	not reported	1	1	1	1	TAGAGTA	3p	3.72108	2.16599	8.36501	2.41891	0.766034	0.454855	0.649409	0.393766	[W (N)] and [W (T)] and [B/AA (N)] and [B/AA (T)]
miR-101-3p__mir-101-1__-1__-1__3MT17M	hsa-mir-101-1	MI0000103	hsa-miR-101-3p	MIMAT0000099	-1	-1	65058443	65058463	chr1	-	1	GTATAGTACTGTGATAACTGA	GTACAGTACTGTGATAACTGA	not reported	4:C-T	not reported	1	1	1	1	TATAGTA	3p	4.1598	3.38702	6.49708	2.90303	0.729488	0.542637	0.680043	0.602293	[W (N)] and [W (T)] and [B/AA (N)] and [B/AA (T)]
miR-101-3p__mir-101-1__-1__-1__4MC16M	hsa-mir-101-1	MI0000103	hsa-miR-101-3p	MIMAT0000099	-1	-1	65058443	65058463	chr1	-	1	GTACCGTACTGTGATAACTGA	GTACAGTACTGTGATAACTGA	not reported	5:A-C	not reported	0	1	0	0	TACCGTA	3p	1.0165	1.19173	1.03533	2.49357	0.0618058	0.47062	0.0356503	0.0813329	[B/AA (T)]
miR-101-3p__mir-101-1__-1__-1__5MT15M	hsa-mir-101-1	MI0000103	hsa-miR-101-3p	MIMAT0000099	-1	-1	65058443	65058463	chr1	-	1	GTACATTACTGTGATAACTGA	GTACAGTACTGTGATAACTGA	not reported	6:G-T	not reported	1	0	1	0	TACATTA	3p	2.02535	1.49009	2.56448	1.43458	0.460408	0.190613	0.36134	0.192942	[W (N)] and [B/AA (N)]
miR-101-3p__mir-101-1__-1__-2__13MC6M	hsa-mir-101-1	MI0000103	hsa-miR-101-3p	MIMAT0000099	-1	-2	65058444	65058463	chr1	-	1	GTACAGTACTGTGCTAACTG	GTACAGTACTGTGATAACTG	not reported	14:A-C	not reported	1	0	1	0	TACAGTA	3p	3.53753	1.32772	5.40461	1.2402	0.692583	0.118416	0.635435	0.139556	[W (N)] and [B/AA (N)]
miR-101-3p__mir-101-1__-1__-2__19MA	hsa-mir-101-1	MI0000103	hsa-miR-101-3p	MIMAT0000099	-1	-2	65058444	65058463	chr1	-	1	GTACAGTACTGTGATAACTA	GTACAGTACTGTGATAACTG	COSV63010439,TCGA=20:G-A	not reported	not reported	0	0	0	1	TACAGTA	3p	1.4493	2.00981	1.30014	1.83321	0.144034	0.286636	0.17019	0.33823	[W (T)]
miR-101-3p__mir-101-1__-1__-2__20M	hsa-mir-101-1	MI0000103	hsa-miR-101-3p	MIMAT0000099	-1	-2	65058444	65058463	chr1	-	0	GTACAGTACTGTGATAACTG	GTACAGTACTGTGATAACTG	not reported	not reported	not reported	1	1	1	1	TACAGTA	3p	63.0264	194.781	107.649	142.358	0.945898	0.951989	0.935149	0.961662	[W (N)] and [W (T)] and [B/AA (N)] and [B/AA (T)]
miR-101-3p__mir-101-1__-1__-2__2MC17M	hsa-mir-101-1	MI0000103	hsa-miR-101-3p	MIMAT0000099	-1	-2	65058444	65058463	chr1	-	1	GTCCAGTACTGTGATAACTG	GTACAGTACTGTGATAACTG	not reported	3:A-C	not reported	0	1	0	1	TCCAGTA	3p	1	3.82954	1	4.12976	0.000179147	0.650663	0.000179147	0.63866	[W (T)] and [B/AA (T)]
miR-101-3p__mir-101-1__-1__-2__3MA16M	hsa-mir-101-1	MI0000103	hsa-miR-101-3p	MIMAT0000099	-1	-2	65058444	65058463	chr1	-	1	GTAAAGTACTGTGATAACTG	GTACAGTACTGTGATAACTG	not reported	4:C-A	not reported	1	0	1	0	TAAAGTA	3p	3.65771	1.56027	6.27003	1.36539	0.72268	0.16804	0.645647	0.21426	[W (N)] and [B/AA (N)]
miR-101-3p__mir-101-1__-1__-3__19M	hsa-mir-101-1	MI0000103	hsa-miR-101-3p	MIMAT0000099	-1	-3	65058445	65058463	chr1	-	0	GTACAGTACTGTGATAACT	GTACAGTACTGTGATAACT	not reported	not reported	not reported	1	1	1	1	TACAGTA	3p	10.127	13.1797	16.0842	12.7668	0.838588	0.82569	0.821928	0.831243	[W (N)] and [W (T)] and [B/AA (N)] and [B/AA (T)]
miR-101-3p__mir-101-1__-1__-4__18M	hsa-mir-101-1	MI0000103	hsa-miR-101-3p	MIMAT0000099	-1	-4	65058446	65058463	chr1	-	0	GTACAGTACTGTGATAAC	GTACAGTACTGTGATAAC	not reported	not reported	not reported	1	1	1	1	TACAGTA	3p	2.42131	3.4259	3.0527	3.33596	0.537263	0.593157	0.482085	0.606593	[W (N)] and [W (T)] and [B/AA (N)] and [B/AA (T)]
miR-101-3p__mir-101-1__-1__-5__17M	hsa-mir-101-1	MI0000103	hsa-miR-101-3p	MIMAT0000099	-1	-5	65058447	65058463	chr1	-	0	GTACAGTACTGTGATAA	GTACAGTACTGTGATAA	not reported	not reported	not reported	1	1	1	1	TACAGTA	3p	4.62272	5.22439	6.00668	8.20483	0.713723	0.773737	0.702436	0.707273	[W (N)] and [W (T)] and [B/AA (N)] and [B/AA (T)]
miR-101-3p__mir-101-1__-1__-6__16M	hsa-mir-101-1	MI0000103	hsa-miR-101-3p	MIMAT0000099	-1	-6	65058448	65058463	chr1	-	0	GTACAGTACTGTGATA	GTACAGTACTGTGATA	not reported	not reported	not reported	1	1	1	1	TACAGTA	3p	3.35942	4.51627	5.12999	3.70335	0.682372	0.622537	0.617521	0.677714	[W (N)] and [W (T)] and [B/AA (N)] and [B/AA (T)]
miR-101-3p__mir-101-1__-1__+1__13MC8MT	hsa-mir-101-1	MI0000103	hsa-miR-101-3p	MIMAT0000099	-1	1	65058441	65058463	chr1	-	2	GTACAGTACTGTGCTAACTGAAT	GTACAGTACTGTGATAACTGAAG	COSV100763220,TCGA=23:G-T	14:A-C	not reported	1	0	0	0	TACAGTA	3p	1.9845	1.10869	2.53289	1.11044	0.453063	0.0548191	0.348083	0.0343963	[B/AA (N)]
miR-101-3p__mir-101-1__-1__+1__22MT	hsa-mir-101-1	MI0000103	hsa-miR-101-3p	MIMAT0000099	-1	1	65058441	65058463	chr1	-	1	GTACAGTACTGTGATAACTGAAT	GTACAGTACTGTGATAACTGAAG	COSV100763220,TCGA=23:G-T	not reported	not reported	1	1	1	1	TACAGTA	3p	20.9452	37.1409	43.2092	43.3572	0.907739	0.911322	0.882659	0.904515	[W (N)] and [W (T)] and [B/AA (N)] and [B/AA (T)]
miR-101-3p__mir-101-1__-1__+1__23M	hsa-mir-101-1	MI0000103	hsa-miR-101-3p	MIMAT0000099	-1	1	65058441	65058463	chr1	-	0	GTACAGTACTGTGATAACTGAAG	GTACAGTACTGTGATAACTGAAG	not reported	not reported	not reported	1	1	1	1	TACAGTA	3p	2.63078	2.03593	3.85323	2.18498	0.615729	0.390541	0.521139	0.351129	[W (N)] and [W (T)] and [B/AA (N)] and [B/AA (T)]
miR-101-3p__mir-101-1__-1__+1__2MC19MT	hsa-mir-101-1	MI0000103	hsa-miR-101-3p	MIMAT0000099	-1	1	65058441	65058463	chr1	-	2	GTCCAGTACTGTGATAACTGAAT	GTACAGTACTGTGATAACTGAAG	COSV100763220,TCGA=23:G-T	3:A-C	not reported	0	1	0	1	TCCAGTA	3p	1	2.01695	1	2.16969	0.000179147	0.382121	0.000179147	0.34235	[W (T)] and [B/AA (T)]
miR-101-3p__mir-101-1__-1__0__13MC8M	hsa-mir-101-1	MI0000103	hsa-miR-101-3p	MIMAT0000099	-1	0	65058442	65058463	chr1	-	1	GTACAGTACTGTGCTAACTGAA	GTACAGTACTGTGATAACTGAA	not reported	14:A-C	not reported	1	0	1	0	TACAGTA	3p	6.13607	1.37466	12.901	1.34638	0.817628	0.160874	0.754568	0.155321	[W (N)] and [B/AA (N)]
miR-101-3p__mir-101-1__-1__0__22M	hsa-mir-101-1	MI0000103	hsa-miR-101-3p	MIMAT0000099	-1	0	65058442	65058463	chr1	-	0	GTACAGTACTGTGATAACTGAA	GTACAGTACTGTGATAACTGAA	not reported	not reported	not reported	1	1	1	1	TACAGTA	3p	120.933	222.138	324.907	216.154	0.969903	0.962917	0.954676	0.964887	[W (N)] and [W (T)] and [B/AA (N)] and [B/AA (T)]
miR-101-3p__mir-101-1__-1__0__2MC19M	hsa-mir-101-1	MI0000103	hsa-miR-101-3p	MIMAT0000099	-1	0	65058442	65058463	chr1	-	1	GTCCAGTACTGTGATAACTGAA	GTACAGTACTGTGATAACTGAA	not reported	3:A-C	not reported	0	1	0	1	TCCAGTA	3p	1	4.55467	1.03577	5.44586	0.063239	0.710677	0.000179147	0.680043	[W (T)] and [B/AA (T)]
miR-101-3p__mir-101-1__-1__0__3MA18M	hsa-mir-101-1	MI0000103	hsa-miR-101-3p	MIMAT0000099	-1	0	65058442	65058463	chr1	-	1	GTAAAGTACTGTGATAACTGAA	GTACAGTACTGTGATAACTGAA	not reported	4:C-A	not reported	1	0	1	0	TAAAGTA	3p	4.86523	1.45114	9.64922	1.30876	0.786277	0.147259	0.711215	0.178252	[W (N)] and [B/AA (N)]
miR-101-3p__mir-101-1__+1__-1__19M	hsa-mir-101-1	MI0000103	hsa-miR-101-3p	MIMAT0000099	1	-1	65058443	65058461	chr1	-	0	ACAGTACTGTGATAACTGA	ACAGTACTGTGATAACTGA	not reported	not reported	not reported	1	0	1	1	CAGTACT	3p	2.67773	2.08322	3.17735	1.73775	0.550699	0.263526	0.530455	0.364386	[W (N)] and [W (T)] and [B/AA (N)]
miR-101-3p__mir-101-1__+1__+1__20MT	hsa-mir-101-1	MI0000103	hsa-miR-101-3p	MIMAT0000099	1	1	65058441	65058461	chr1	-	1	ACAGTACTGTGATAACTGAAT	ACAGTACTGTGATAACTGAAG	COSV100763220,TCGA=21:G-T	not reported	not reported	1	1	1	1	CAGTACT	3p	3.48145	2.61712	4.38185	2.75923	0.64708	0.522035	0.630061	0.502866	[W (N)] and [W (T)] and [B/AA (N)] and [B/AA (T)]
miR-101-3p__mir-101-1__+1__+1__21M	hsa-mir-101-1	MI0000103	hsa-miR-101-3p	MIMAT0000099	1	1	65058441	65058461	chr1	-	0	ACAGTACTGTGATAACTGAAG	ACAGTACTGTGATAACTGAAG	not reported	not reported	not reported	1	0	0	0	CAGTACT	3p	1.81198	1.34336	2.17759	1.30967	0.362415	0.147617	0.287531	0.14493	[B/AA (N)]
miR-101-3p__mir-101-1__+2__-1__18M	hsa-mir-101-1	MI0000103	hsa-miR-101-3p	MIMAT0000099	2	-1	65058443	65058460	chr1	-	0	CAGTACTGTGATAACTGA	CAGTACTGTGATAACTGA	not reported	not reported	not reported	1	1	1	1	AGTACTG	3p	3.30062	3.34392	3.42661	2.78939	0.579721	0.526335	0.610892	0.599068	[W (N)] and [W (T)] and [B/AA (N)] and [B/AA (T)]
miR-101-3p__mir-101-1__+2__-2__17M	hsa-mir-101-1	MI0000103	hsa-miR-101-3p	MIMAT0000099	2	-2	65058444	65058460	chr1	-	0	CAGTACTGTGATAACTG	CAGTACTGTGATAACTG	not reported	not reported	not reported	0	1	0	0	AGTACTG	3p	1.5477	1.97137	1.74674	2.01276	0.243103	0.329094	0.199749	0.323898	[B/AA (T)]
miR-101-3p__mir-101-1__+2__+1__19MT	hsa-mir-101-1	MI0000103	hsa-miR-101-3p	MIMAT0000099	2	1	65058441	65058460	chr1	-	1	CAGTACTGTGATAACTGAAT	CAGTACTGTGATAACTGAAG	COSV100763220,TCGA=20:G-T	not reported	not reported	1	1	1	1	AGTACTG	3p	2.58521	2.36445	3.19673	2.08642	0.553028	0.356324	0.513436	0.449301	[W (N)] and [W (T)] and [B/AA (N)] and [B/AA (T)]
miR-101-3p__mir-101-1__+2__+1__20M	hsa-mir-101-1	MI0000103	hsa-miR-101-3p	MIMAT0000099	2	1	65058441	65058460	chr1	-	0	CAGTACTGTGATAACTGAAG	CAGTACTGTGATAACTGAAG	not reported	not reported	not reported	1	0	1	0	AGTACTG	3p	2.06103	1.64576	2.46989	1.48734	0.437119	0.204765	0.374955	0.237728	[W (N)] and [B/AA (N)]
miR-101-3p__mir-101-1__+3__-1__17M	hsa-mir-101-1	MI0000103	hsa-miR-101-3p	MIMAT0000099	3	-1	65058443	65058459	chr1	-	0	AGTACTGTGATAACTGA	AGTACTGTGATAACTGA	not reported	not reported	not reported	1	0	1	1	GTACTGT	3p	2.36279	2.04404	3.10788	1.75302	0.542816	0.266929	0.466679	0.351845	[W (N)] and [W (T)] and [B/AA (N)]
miR-101-3p__mir-101-1__+4__-1__16M	hsa-mir-101-1	MI0000103	hsa-miR-101-3p	MIMAT0000099	4	-1	65058443	65058458	chr1	-	0	GTACTGTGATAACTGA	GTACTGTGATAACTGA	not reported	not reported	not reported	1	1	1	1	TACTGTG	3p	2.74723	4.40621	3.56605	3.96528	0.594411	0.640272	0.5421	0.670727	[W (N)] and [W (T)] and [B/AA (N)] and [B/AA (T)]
miR-101-3p__mir-101-1__+4__+1__17MT	hsa-mir-101-1	MI0000103	hsa-miR-101-3p	MIMAT0000099	4	1	65058441	65058458	chr1	-	1	GTACTGTGATAACTGAAT	GTACTGTGATAACTGAAG	COSV100763220,TCGA=18:G-T	not reported	not reported	1	1	1	1	TACTGTG	3p	4.33195	6.26279	5.4161	6.57455	0.692942	0.746148	0.689	0.742028	[W (N)] and [W (T)] and [B/AA (N)] and [B/AA (T)]
miR-101-3p__mir-101-1__+4__0__17M	hsa-mir-101-1	MI0000103	hsa-miR-101-3p	MIMAT0000099	4	0	65058442	65058458	chr1	-	0	GTACTGTGATAACTGAA	GTACTGTGATAACTGAA	not reported	not reported	not reported	1	1	0	1	TACTGTG	3p	1.87163	3.31354	2.18888	3.25483	0.36564	0.584916	0.3067	0.595665	[W (T)] and [B/AA (N)] and [B/AA (T)]
miR-101-3p__mir-101-1__0__-1__10MC9M	hsa-mir-101-1	MI0000103	hsa-miR-101-3p	MIMAT0000099	0	-1	65058443	65058462	chr1	-	1	TACAGTACTGCGATAACTGA	TACAGTACTGTGATAACTGA	not reported	11:T-C	not reported	1	0	0	0	ACAGTAC	3p	1.8991	1.79862	2.43282	1.71635	0.427266	0.257614	0.316374	0.276066	[B/AA (N)]
miR-101-3p__mir-101-1__0__-1__11MT8M	hsa-mir-101-1	MI0000103	hsa-miR-101-3p	MIMAT0000099	0	-1	65058443	65058462	chr1	-	1	TACAGTACTGTTATAACTGA	TACAGTACTGTGATAACTGA	rs778893471=12:G-T	not reported	not reported	1	0	1	0	ACAGTAC	3p	2.42633	1.54785	2.65766	1.51975	0.476173	0.211752	0.483877	0.21014	[W (N)] and [B/AA (N)]
miR-101-3p__mir-101-1__0__-1__12MC7M	hsa-mir-101-1	MI0000103	hsa-miR-101-3p	MIMAT0000099	0	-1	65058443	65058462	chr1	-	1	TACAGTACTGTGCTAACTGA	TACAGTACTGTGATAACTGA	not reported	13:A-C	not reported	1	1	1	1	ACAGTAC	3p	18.3422	4.71553	72.1177	3.42448	0.929595	0.600322	0.875672	0.687209	[W (N)] and [W (T)] and [B/AA (N)] and [B/AA (T)]
miR-101-3p__mir-101-1__0__-1__12MG7M	hsa-mir-101-1	MI0000103	hsa-miR-101-3p	MIMAT0000099	0	-1	65058443	65058462	chr1	-	1	TACAGTACTGTGGTAACTGA	TACAGTACTGTGATAACTGA	not reported	13:A-G	not reported	1	0	0	0	ACAGTAC	3p	1.90696	1.43216	2.417	1.36686	0.423862	0.168219	0.31924	0.173594	[B/AA (N)]
miR-101-3p__mir-101-1__0__-1__14MC5M	hsa-mir-101-1	MI0000103	hsa-miR-101-3p	MIMAT0000099	0	-1	65058443	65058462	chr1	-	1	TACAGTACTGTGATCACTGA	TACAGTACTGTGATAACTGA	not reported	15:A-C	not reported	1	0	1	0	ACAGTAC	3p	3.40169	1.3913	3.9445	1.20588	0.620387	0.103905	0.621283	0.161591	[W (N)] and [B/AA (N)]
miR-101-3p__mir-101-1__0__-1__15MC4M	hsa-mir-101-1	MI0000103	hsa-miR-101-3p	MIMAT0000099	0	-1	65058443	65058462	chr1	-	1	TACAGTACTGTGATACCTGA	TACAGTACTGTGATAACTGA	not reported	16:A-C	not reported	1	0	1	0	ACAGTAC	3p	3.13041	1.27163	2.99918	1.22627	0.530276	0.113759	0.589753	0.115729	[W (N)] and [B/AA (N)]
miR-101-3p__mir-101-1__0__-1__15MG4M	hsa-mir-101-1	MI0000103	hsa-miR-101-3p	MIMAT0000099	0	-1	65058443	65058462	chr1	-	1	TACAGTACTGTGATAGCTGA	TACAGTACTGTGATAACTGA	not reported	16:A-G	not reported	1	0	1	0	ACAGTAC	3p	2.00748	1.44563	2.1539	1.41957	0.354891	0.18703	0.355607	0.17646	[W (N)] and [B/AA (N)]
miR-101-3p__mir-101-1__0__-1__16MA3M	hsa-mir-101-1	MI0000103	hsa-miR-101-3p	MIMAT0000099	0	-1	65058443	65058462	chr1	-	1	TACAGTACTGTGATAAATGA	TACAGTACTGTGATAACTGA	not reported	17:C-A	not reported	1	0	1	0	ACAGTAC	3p	2.32722	1.89894	3.32293	1.77758	0.567897	0.2732	0.458259	0.303296	[W (N)] and [B/AA (N)]
miR-101-3p__mir-101-1__0__-1__16MT3M	hsa-mir-101-1	MI0000103	hsa-miR-101-3p	MIMAT0000099	0	-1	65058443	65058462	chr1	-	1	TACAGTACTGTGATAATTGA	TACAGTACTGTGATAACTGA	not reported	17:C-T	not reported	1	0	1	0	ACAGTAC	3p	2.00737	1.45362	2.25494	1.48612	0.384629	0.204586	0.355428	0.179147	[W (N)] and [B/AA (N)]
miR-101-3p__mir-101-1__0__-1__17MC2M	hsa-mir-101-1	MI0000103	hsa-miR-101-3p	MIMAT0000099	0	-1	65058443	65058462	chr1	-	1	TACAGTACTGTGATAACCGA	TACAGTACTGTGATAACTGA	not reported	18:T-C	not reported	1	1	1	1	ACAGTAC	3p	2.72065	2.07941	3.35059	2.10627	0.571121	0.362415	0.537442	0.363131	[W (N)] and [W (T)] and [B/AA (N)] and [B/AA (T)]
miR-101-3p__mir-101-1__0__-1__18MA1M	hsa-mir-101-1	MI0000103	hsa-miR-101-3p	MIMAT0000099	0	-1	65058443	65058462	chr1	-	1	TACAGTACTGTGATAACTAA	TACAGTACTGTGATAACTGA	COSV63010439,TCGA=19:G-A	not reported	not reported	1	0	1	1	ACAGTAC	3p	2.18294	2.08706	2.85484	1.91228	0.509316	0.305984	0.42225	0.36564	[W (N)] and [W (T)] and [B/AA (N)]
miR-101-3p__mir-101-1__0__-1__19MG	hsa-mir-101-1	MI0000103	hsa-miR-101-3p	MIMAT0000099	0	-1	65058443	65058462	chr1	-	1	TACAGTACTGTGATAACTGG	TACAGTACTGTGATAACTGA	not reported	not reported	29233923=20:A-G	1	0	0	0	ACAGTAC	3p	1.84464	1.4718	2.4938	1.48367	0.442852	0.20387	0.296489	0.185597	[B/AA (N)]
miR-101-3p__mir-101-1__0__-1__1MC13MC4M	hsa-mir-101-1	MI0000103	hsa-miR-101-3p	MIMAT0000099	0	-1	65058443	65058462	chr1	-	2	TCCAGTACTGTGATACCTGA	TACAGTACTGTGATAACTGA	not reported	2:A-C;16:A-C	not reported	0	0	1	0	CCAGTAC	3p	2.02501	1.01801	1.53251	1.02859	0.201182	0.0100322	0.361161	0.00376209	[W (N)]
miR-101-3p__mir-101-1__0__-1__1MC18M	hsa-mir-101-1	MI0000103	hsa-miR-101-3p	MIMAT0000099	0	-1	65058443	65058462	chr1	-	1	TCCAGTACTGTGATAACTGA	TACAGTACTGTGATAACTGA	not reported	2:A-C	not reported	1	0	1	1	CCAGTAC	3p	11.3328	2.11748	26.2888	1.82575	0.879792	0.285023	0.83608	0.375672	[W (N)] and [W (T)] and [B/AA (N)]
miR-101-3p__mir-101-1__0__-1__1MC1MC16M	hsa-mir-101-1	MI0000103	hsa-miR-101-3p	MIMAT0000099	0	-1	65058443	65058462	chr1	-	2	TCCCGTACTGTGATAACTGA	TACAGTACTGTGATAACTGA	not reported	2:A-C;4:A-C	not reported	1	0	1	0	CCCGTAC	3p	9.32368	1.55649	17.548	1.39832	0.847187	0.179147	0.81512	0.213364	[W (N)] and [B/AA (N)]
miR-101-3p__mir-101-1__0__-1__1MG18M	hsa-mir-101-1	MI0000103	hsa-miR-101-3p	MIMAT0000099	0	-1	65058443	65058462	chr1	-	1	TGCAGTACTGTGATAACTGA	TACAGTACTGTGATAACTGA	not reported	2:A-G	not reported	1	1	1	1	GCAGTAC	3p	2.24935	2.55345	3.03057	2.76098	0.533859	0.522573	0.439986	0.494088	[W (N)] and [W (T)] and [B/AA (N)] and [B/AA (T)]
miR-101-3p__mir-101-1__0__-1__1MT18M	hsa-mir-101-1	MI0000103	hsa-miR-101-3p	MIMAT0000099	0	-1	65058443	65058462	chr1	-	1	TTCAGTACTGTGATAACTGA	TACAGTACTGTGATAACTGA	not reported	2:A-T	not reported	0	1	0	1	TCAGTAC	3p	1.61499	2.79098	1.58871	2.57645	0.213364	0.48943	0.221963	0.532963	[W (T)] and [B/AA (T)]
miR-101-3p__mir-101-1__0__-1__20M	hsa-mir-101-1	MI0000103	hsa-miR-101-3p	MIMAT0000099	0	-1	65058443	65058462	chr1	-	0	TACAGTACTGTGATAACTGA	TACAGTACTGTGATAACTGA	not reported	not reported	not reported	1	1	1	1	ACAGTAC	3p	4656.94	4848.38	11074.5	4642.04	0.997313	0.9957	0.9957	0.99588	[W (N)] and [W (T)] and [B/AA (N)] and [B/AA (T)]
miR-101-3p__mir-101-1__0__-1__2MA17M	hsa-mir-101-1	MI0000103	hsa-miR-101-3p	MIMAT0000099	0	-1	65058443	65058462	chr1	-	1	TAAAGTACTGTGATAACTGA	TACAGTACTGTGATAACTGA	not reported	3:C-A	not reported	1	1	1	1	AAAGTAC	3p	35.8463	27.0908	95.1955	26.5635	0.940344	0.884092	0.913651	0.88875	[W (N)] and [W (T)] and [B/AA (N)] and [B/AA (T)]
miR-101-3p__mir-101-1__0__-1__2MA9MC7M	hsa-mir-101-1	MI0000103	hsa-miR-101-3p	MIMAT0000099	0	-1	65058443	65058462	chr1	-	2	TAAAGTACTGTGCTAACTGA	TACAGTACTGTGATAACTGA	not reported	3:C-A;13:A-C	not reported	1	0	0	0	AAAGTAC	3p	1.52389	1.11549	2.35879	1.31414	0.410068	0.149409	0.190613	0.0412039	[B/AA (N)]
miR-101-3p__mir-101-1__0__-1__2MAC16M	hsa-mir-101-1	MI0000103	hsa-miR-101-3p	MIMAT0000099	0	-1	65058443	65058462	chr1	-	2	TAACGTACTGTGATAACTGA	TACAGTACTGTGATAACTGA	not reported	3:C-A;4:A-C	not reported	1	0	1	0	AACGTAC	3p	2.11808	1.05201	2.92071	1.09353	0.519348	0.0437119	0.399319	0.0125403	[W (N)] and [B/AA (N)]
miR-101-3p__mir-101-1__0__-1__2MG17M	hsa-mir-101-1	MI0000103	hsa-miR-101-3p	MIMAT0000099	0	-1	65058443	65058462	chr1	-	1	TAGAGTACTGTGATAACTGA	TACAGTACTGTGATAACTGA	not reported	3:C-G	not reported	1	1	0	0	AGAGTAC	3p	1.99173	1.88609	2.45787	2.05871	0.434074	0.3445	0.349875	0.299355	[B/AA (N)] and [B/AA (T)]
miR-101-3p__mir-101-1__0__-1__2MGC16M	hsa-mir-101-1	MI0000103	hsa-miR-101-3p	MIMAT0000099	0	-1	65058443	65058462	chr1	-	2	TAGCGTACTGTGATAACTGA	TACAGTACTGTGATAACTGA	not reported	3:C-G;4:A-C	not reported	1	0	1	0	AGCGTAC	3p	5.34442	1.4966	12.1747	1.32058	0.811	0.151738	0.729308	0.195091	[W (N)] and [B/AA (N)]
miR-101-3p__mir-101-1__0__-1__2MT17M	hsa-mir-101-1	MI0000103	hsa-miR-101-3p	MIMAT0000099	0	-1	65058443	65058462	chr1	-	1	TATAGTACTGTGATAACTGA	TACAGTACTGTGATAACTGA	not reported	3:C-T	not reported	1	1	1	1	ATAGTAC	3p	4.9071	3.45457	7.47264	2.92741	0.752239	0.546399	0.712648	0.609638	[W (N)] and [W (T)] and [B/AA (N)] and [B/AA (T)]
miR-101-3p__mir-101-1__0__-1__3MC10MC5M	hsa-mir-101-1	MI0000103	hsa-miR-101-3p	MIMAT0000099	0	-1	65058443	65058462	chr1	-	2	TACCGTACTGTGATCACTGA	TACAGTACTGTGATAACTGA	not reported	4:A-C;15:A-C	not reported	1	0	0	0	ACCGTAC	3p	1.77344	1.01625	2.29991	1.04213	0.397169	0.015765	0.274633	0.00286636	[B/AA (N)]
miR-101-3p__mir-101-1__0__-1__3MC11MC4M	hsa-mir-101-1	MI0000103	hsa-miR-101-3p	MIMAT0000099	0	-1	65058443	65058462	chr1	-	2	TACCGTACTGTGATACCTGA	TACAGTACTGTGATAACTGA	not reported	4:A-C;16:A-C	not reported	1	0	0	0	ACCGTAC	3p	1.99193	1.07218	2.08932	1.08789	0.332318	0.0410247	0.350054	0.0179147	[B/AA (N)]
miR-101-3p__mir-101-1__0__-1__3MC16M	hsa-mir-101-1	MI0000103	hsa-miR-101-3p	MIMAT0000099	0	-1	65058443	65058462	chr1	-	1	TACCGTACTGTGATAACTGA	TACAGTACTGTGATAACTGA	not reported	4:A-C	not reported	1	1	1	1	ACCGTAC	3p	79.858	2.98069	217.651	2.48496	0.962917	0.468649	0.942673	0.559119	[W (N)] and [W (T)] and [B/AA (N)] and [B/AA (T)]
miR-101-3p__mir-101-1__0__-1__3MG16M	hsa-mir-101-1	MI0000103	hsa-miR-101-3p	MIMAT0000099	0	-1	65058443	65058462	chr1	-	1	TACGGTACTGTGATAACTGA	TACAGTACTGTGATAACTGA	not reported	not reported	29233923=4:A-G	1	1	1	1	ACGGTAC	3p	2.24332	2.3234	2.52633	2.22695	0.451451	0.402365	0.437298	0.43694	[W (N)] and [W (T)] and [B/AA (N)] and [B/AA (T)]
miR-101-3p__mir-101-1__0__-1__3MT16M	hsa-mir-101-1	MI0000103	hsa-miR-101-3p	MIMAT0000099	0	-1	65058443	65058462	chr1	-	1	TACTGTACTGTGATAACTGA	TACAGTACTGTGATAACTGA	rs1430733904=4:A-T	not reported	not reported	1	1	0	1	ACTGTAC	3p	1.96414	2.76618	2.06327	2.45697	0.32139	0.461125	0.34253	0.529201	[W (T)] and [B/AA (N)] and [B/AA (T)]
miR-101-3p__mir-101-1__0__-1__4MC15M	hsa-mir-101-1	MI0000103	hsa-miR-101-3p	MIMAT0000099	0	-1	65058443	65058462	chr1	-	1	TACACTACTGTGATAACTGA	TACAGTACTGTGATAACTGA	not reported	5:G-C	not reported	0	1	0	0	ACACTAC	3p	1.48292	1.29837	1.65249	2.31569	0.225188	0.429595	0.178789	0.127911	[B/AA (T)]
miR-101-3p__mir-101-1__0__-1__4MT15M	hsa-mir-101-1	MI0000103	hsa-miR-101-3p	MIMAT0000099	0	-1	65058443	65058462	chr1	-	1	TACATTACTGTGATAACTGA	TACAGTACTGTGATAACTGA	not reported	5:G-T	not reported	1	1	1	1	ACATTAC	3p	3.86143	2.01247	5.83271	2.93001	0.707811	0.546757	0.659083	0.339663	[W (N)] and [W (T)] and [B/AA (N)] and [B/AA (T)]
miR-101-3p__mir-101-1__0__-1__5MC14M	hsa-mir-101-1	MI0000103	hsa-miR-101-3p	MIMAT0000099	0	-1	65058443	65058462	chr1	-	1	TACAGCACTGTGATAACTGA	TACAGTACTGTGATAACTGA	TCGA=6:T-C	not reported	not reported	1	0	0	0	ACAGCAC	3p	1.98548	1.76528	2.45161	1.73909	0.431924	0.264063	0.348441	0.268721	[B/AA (N)]
miR-101-3p__mir-101-1__0__-1__5MG14M	hsa-mir-101-1	MI0000103	hsa-miR-101-3p	MIMAT0000099	0	-1	65058443	65058462	chr1	-	1	TACAGGACTGTGATAACTGA	TACAGTACTGTGATAACTGA	not reported	6:T-G	not reported	1	0	1	0	ACAGGAC	3p	2.00053	1.70049	3.05728	1.68298	0.538158	0.249731	0.352204	0.25206	[W (N)] and [B/AA (N)]
miR-101-3p__mir-101-1__0__-1__6MC13M	hsa-mir-101-1	MI0000103	hsa-miR-101-3p	MIMAT0000099	0	-1	65058443	65058462	chr1	-	1	TACAGTCCTGTGATAACTGA	TACAGTACTGTGATAACTGA	not reported	7:A-C	not reported	0	0	1	0	ACAGTCC	3p	2.15238	1.09767	1.98065	1.07978	0.288606	0.0367252	0.41168	0.0290219	[W (N)]
miR-101-3p__mir-101-1__0__-1__6MG13M	hsa-mir-101-1	MI0000103	hsa-miR-101-3p	MIMAT0000099	0	-1	65058443	65058462	chr1	-	1	TACAGTGCTGTGATAACTGA	TACAGTACTGTGATAACTGA	not reported	7:A-G	not reported	1	0	1	0	ACAGTGC	3p	2.40797	1.38115	2.74031	1.34762	0.488714	0.161412	0.478502	0.157829	[W (N)] and [B/AA (N)]
miR-101-3p__mir-101-1__0__-1__6MT13M	hsa-mir-101-1	MI0000103	hsa-miR-101-3p	MIMAT0000099	0	-1	65058443	65058462	chr1	-	1	TACAGTTCTGTGATAACTGA	TACAGTACTGTGATAACTGA	not reported	7:A-T	not reported	1	0	1	0	ACAGTTC	3p	2.07917	1.18239	2.52028	1.21827	0.450197	0.109996	0.382479	0.076675	[W (N)] and [B/AA (N)]
miR-101-3p__mir-101-1__0__-1__7MA12M	hsa-mir-101-1	MI0000103	hsa-miR-101-3p	MIMAT0000099	0	-1	65058443	65058462	chr1	-	1	TACAGTAATGTGATAACTGA	TACAGTACTGTGATAACTGA	not reported	8:C-A	not reported	1	0	1	0	ACAGTAA	3p	2.26508	1.53603	2.7974	1.66206	0.501075	0.243282	0.443748	0.206557	[W (N)] and [B/AA (N)]
miR-101-3p__mir-101-1__0__-1__7MG12M	hsa-mir-101-1	MI0000103	hsa-miR-101-3p	MIMAT0000099	0	-1	65058443	65058462	chr1	-	1	TACAGTAGTGTGATAACTGA	TACAGTACTGTGATAACTGA	not reported	8:C-G	not reported	1	0	0	0	ACAGTAG	3p	1.41482	1.21413	2.10885	1.23508	0.339484	0.116446	0.159979	0.09244	[B/AA (N)]
miR-101-3p__mir-101-1__0__-1__8MC11M	hsa-mir-101-1	MI0000103	hsa-miR-101-3p	MIMAT0000099	0	-1	65058443	65058462	chr1	-	1	TACAGTACCGTGATAACTGA	TACAGTACTGTGATAACTGA	not reported	9:T-C	not reported	1	0	0	0	ACAGTAC	3p	1.88776	1.55013	2.45821	1.5157	0.434253	0.211035	0.312254	0.211573	[B/AA (N)]
miR-101-3p__mir-101-1__0__-1__9MT10M	hsa-mir-101-1	MI0000103	hsa-miR-101-3p	MIMAT0000099	0	-1	65058443	65058462	chr1	-	1	TACAGTACTTTGATAACTGA	TACAGTACTGTGATAACTGA	not reported	10:G-T	not reported	1	0	0	0	ACAGTAC	3p	1.96615	1.40584	2.0153	1.43845	0.300072	0.192583	0.342888	0.165532	[B/AA (N)]
miR-101-3p__mir-101-1__0__-2__12MC6M	hsa-mir-101-1	MI0000103	hsa-miR-101-3p	MIMAT0000099	0	-2	65058444	65058462	chr1	-	1	TACAGTACTGTGCTAACTG	TACAGTACTGTGATAACTG	not reported	13:A-C	not reported	1	0	1	1	ACAGTAC	3p	3.14707	2.79266	6.91609	1.91528	0.740953	0.306342	0.592798	0.533321	[W (N)] and [W (T)] and [B/AA (N)]
miR-101-3p__mir-101-1__0__-2__19M	hsa-mir-101-1	MI0000103	hsa-miR-101-3p	MIMAT0000099	0	-2	65058444	65058462	chr1	-	0	TACAGTACTGTGATAACTG	TACAGTACTGTGATAACTG	not reported	not reported	not reported	1	1	1	1	ACAGTAC	3p	187.119	447.25	473.7	448.824	0.977607	0.977248	0.963812	0.977786	[W (N)] and [W (T)] and [B/AA (N)] and [B/AA (T)]
miR-101-3p__mir-101-1__0__-2__1MC17M	hsa-mir-101-1	MI0000103	hsa-miR-101-3p	MIMAT0000099	0	-2	65058444	65058462	chr1	-	1	TCCAGTACTGTGATAACTG	TACAGTACTGTGATAACTG	not reported	2:A-C	not reported	1	0	0	0	CCAGTAC	3p	1.81613	1.1776	2.18823	1.17895	0.365281	0.0908277	0.289144	0.0736295	[B/AA (N)]
miR-101-3p__mir-101-1__0__-2__1MC1MC15M	hsa-mir-101-1	MI0000103	hsa-miR-101-3p	MIMAT0000099	0	-2	65058444	65058462	chr1	-	2	TCCCGTACTGTGATAACTG	TACAGTACTGTGATAACTG	not reported	2:A-C;4:A-C	not reported	1	0	0	0	CCCGTAC	3p	1.65683	1.08371	2.10685	1.06341	0.338409	0.0268721	0.23952	0.0222143	[B/AA (N)]
miR-101-3p__mir-101-1__0__-2__2MA16M	hsa-mir-101-1	MI0000103	hsa-miR-101-3p	MIMAT0000099	0	-2	65058444	65058462	chr1	-	1	TAAAGTACTGTGATAACTG	TACAGTACTGTGATAACTG	not reported	3:C-A	not reported	1	1	1	1	AAAGTAC	3p	3.45838	3.64744	4.87312	3.49112	0.672698	0.606772	0.627732	0.625761	[W (N)] and [W (T)] and [B/AA (N)] and [B/AA (T)]
miR-101-3p__mir-101-1__0__-2__2MGC15M	hsa-mir-101-1	MI0000103	hsa-miR-101-3p	MIMAT0000099	0	-2	65058444	65058462	chr1	-	2	TAGCGTACTGTGATAACTG	TACAGTACTGTGATAACTG	not reported	3:C-G;4:A-C	not reported	1	0	0	0	AGCGTAC	3p	1.92628	1.10065	2.5088	1.05243	0.446435	0.0207811	0.327302	0.0306342	[B/AA (N)]
miR-101-3p__mir-101-1__0__-2__3MC15M	hsa-mir-101-1	MI0000103	hsa-miR-101-3p	MIMAT0000099	0	-2	65058444	65058462	chr1	-	1	TACCGTACTGTGATAACTG	TACAGTACTGTGATAACTG	not reported	4:A-C	not reported	1	0	1	0	ACCGTAC	3p	8.32323	1.54326	15.59	1.39423	0.835543	0.176818	0.798997	0.208348	[W (N)] and [B/AA (N)]
miR-101-3p__mir-101-1__0__-3__18M	hsa-mir-101-1	MI0000103	hsa-miR-101-3p	MIMAT0000099	0	-3	65058445	65058462	chr1	-	0	TACAGTACTGTGATAACT	TACAGTACTGTGATAACT	not reported	not reported	not reported	1	1	1	1	ACAGTAC	3p	30.3801	44.8963	65.6391	47.6881	0.926191	0.917055	0.905948	0.915801	[W (N)] and [W (T)] and [B/AA (N)] and [B/AA (T)]
miR-101-3p__mir-101-1__0__-3__3MC14M	hsa-mir-101-1	MI0000103	hsa-miR-101-3p	MIMAT0000099	0	-3	65058445	65058462	chr1	-	1	TACCGTACTGTGATAACT	TACAGTACTGTGATAACT	not reported	4:A-C	not reported	1	0	1	0	ACCGTAC	3p	3.91221	1.17881	5.15389	1.12489	0.683447	0.0614475	0.663561	0.0745253	[W (N)] and [B/AA (N)]
miR-101-3p__mir-101-1__0__-4__17M	hsa-mir-101-1	MI0000103	hsa-miR-101-3p	MIMAT0000099	0	-4	65058446	65058462	chr1	-	0	TACAGTACTGTGATAAC	TACAGTACTGTGATAAC	not reported	not reported	not reported	1	1	1	1	ACAGTAC	3p	19.0418	15.6517	40.7278	16.6045	0.905052	0.849158	0.877463	0.846829	[W (N)] and [W (T)] and [B/AA (N)] and [B/AA (T)]
miR-101-3p__mir-101-1__0__-4__3MC13M	hsa-mir-101-1	MI0000103	hsa-miR-101-3p	MIMAT0000099	0	-4	65058446	65058462	chr1	-	1	TACCGTACTGTGATAAC	TACAGTACTGTGATAAC	not reported	4:A-C	not reported	1	0	0	0	ACCGTAC	3p	1.92135	1.075	2.20149	1.06864	0.369402	0.029201	0.324436	0.0186313	[B/AA (N)]
miR-101-3p__mir-101-1__0__-5__16M	hsa-mir-101-1	MI0000103	hsa-miR-101-3p	MIMAT0000099	0	-5	65058447	65058462	chr1	-	0	TACAGTACTGTGATAA	TACAGTACTGTGATAA	not reported	not reported	not reported	1	1	1	1	ACAGTAC	3p	14.7549	19.0963	25.402	16.008	0.876568	0.846471	0.857578	0.862415	[W (N)] and [W (T)] and [B/AA (N)] and [B/AA (T)]
miR-101-3p__mir-101-1__0__+1__12MC8MT	hsa-mir-101-1	MI0000103	hsa-miR-101-3p	MIMAT0000099	0	1	65058441	65058462	chr1	-	2	TACAGTACTGTGCTAACTGAAT	TACAGTACTGTGATAACTGAAG	COSV100763220,TCGA=22:G-T	13:A-C	not reported	1	1	1	1	ACAGTAC	3p	8.54932	2.86826	27.8009	2.24744	0.882838	0.407202	0.802042	0.544966	[W (N)] and [W (T)] and [B/AA (N)] and [B/AA (T)]
miR-101-3p__mir-101-1__0__+1__12MC9M	hsa-mir-101-1	MI0000103	hsa-miR-101-3p	MIMAT0000099	0	1	65058441	65058462	chr1	-	1	TACAGTACTGTGCTAACTGAAG	TACAGTACTGTGATAACTGAAG	not reported	13:A-C	not reported	1	0	1	0	ACAGTAC	3p	5.11167	1.80711	13.6214	1.47607	0.822465	0.201182	0.720351	0.279111	[W (N)] and [B/AA (N)]
miR-101-3p__mir-101-1__0__+1__14MC6MT	hsa-mir-101-1	MI0000103	hsa-miR-101-3p	MIMAT0000099	0	1	65058441	65058462	chr1	-	2	TACAGTACTGTGATCACTGAAT	TACAGTACTGTGATAACTGAAG	COSV100763220,TCGA=22:G-T	15:A-C	not reported	1	0	0	0	ACAGTAC	3p	1.80677	1.14463	2.04106	1.07823	0.311895	0.0351129	0.285023	0.0549982	[B/AA (N)]
miR-101-3p__mir-101-1__0__+1__17MC3MT	hsa-mir-101-1	MI0000103	hsa-miR-101-3p	MIMAT0000099	0	1	65058441	65058462	chr1	-	2	TACAGTACTGTGATAACCGAAT	TACAGTACTGTGATAACTGAAG	COSV100763220,TCGA=22:G-T	18:T-C	not reported	1	0	0	0	ACAGTAC	3p	1.48808	1.35688	2.01147	1.40384	0.298638	0.180401	0.179685	0.150125	[B/AA (N)]
miR-101-3p__mir-101-1__0__+1__18MT2MT	hsa-mir-101-1	MI0000103	hsa-miR-101-3p	MIMAT0000099	0	1	65058441	65058462	chr1	-	2	TACAGTACTGTGATAACTTAAT	TACAGTACTGTGATAACTGAAG	COSV100763220,TCGA=22:G-T	19:G-T	not reported	1	0	1	0	ACAGTAC	3p	2.6334	1.29984	3.49099	1.27003	0.586349	0.132032	0.522214	0.128807	[W (N)] and [B/AA (N)]
miR-101-3p__mir-101-1__0__+1__18MT3M	hsa-mir-101-1	MI0000103	hsa-miR-101-3p	MIMAT0000099	0	1	65058441	65058462	chr1	-	1	TACAGTACTGTGATAACTTAAG	TACAGTACTGTGATAACTGAAG	not reported	19:G-T	not reported	1	0	0	0	ACAGTAC	3p	1.72416	1.10984	2.14559	1.11703	0.352204	0.0569688	0.258151	0.0358295	[B/AA (N)]
miR-101-3p__mir-101-1__0__+1__1MC19MT	hsa-mir-101-1	MI0000103	hsa-miR-101-3p	MIMAT0000099	0	1	65058441	65058462	chr1	-	2	TCCAGTACTGTGATAACTGAAT	TACAGTACTGTGATAACTGAAG	COSV100763220,TCGA=22:G-T	2:A-C	not reported	1	0	1	0	CCAGTAC	3p	4.98904	1.51799	10.9595	1.41799	0.800072	0.186134	0.715693	0.202078	[W (N)] and [B/AA (N)]
miR-101-3p__mir-101-1__0__+1__1MC1MC17MT	hsa-mir-101-1	MI0000103	hsa-miR-101-3p	MIMAT0000099	0	1	65058441	65058462	chr1	-	3	TCCCGTACTGTGATAACTGAAT	TACAGTACTGTGATAACTGAAG	COSV100763220,TCGA=22:G-T	2:A-C;4:A-C	not reported	1	0	1	0	CCCGTAC	3p	4.08667	1.25382	7.0413	1.18629	0.742207	0.0945898	0.673952	0.108384	[W (N)] and [B/AA (N)]
miR-101-3p__mir-101-1__0__+1__1MC1MC18M	hsa-mir-101-1	MI0000103	hsa-miR-101-3p	MIMAT0000099	0	1	65058441	65058462	chr1	-	2	TCCCGTACTGTGATAACTGAAG	TACAGTACTGTGATAACTGAAG	not reported	2:A-C;4:A-C	not reported	1	0	1	0	CCCGTAC	3p	2.21717	1.11559	3.27433	1.08667	0.561806	0.040129	0.431028	0.041383	[W (N)] and [B/AA (N)]
miR-101-3p__mir-101-1__0__+1__1MC20M	hsa-mir-101-1	MI0000103	hsa-miR-101-3p	MIMAT0000099	0	1	65058441	65058462	chr1	-	1	TCCAGTACTGTGATAACTGAAG	TACAGTACTGTGATAACTGAAG	not reported	2:A-C	not reported	1	0	1	0	CCAGTAC	3p	2.99676	1.2727	4.55445	1.19871	0.656216	0.0996059	0.575958	0.116446	[W (N)] and [B/AA (N)]
miR-101-3p__mir-101-1__0__+1__21MT	hsa-mir-101-1	MI0000103	hsa-miR-101-3p	MIMAT0000099	0	1	65058441	65058462	chr1	-	1	TACAGTACTGTGATAACTGAAT	TACAGTACTGTGATAACTGAAG	COSV100763220,TCGA=22:G-T	not reported	not reported	1	1	1	1	ACAGTAC	3p	1411.22	1655.84	3871.48	1800	0.994088	0.99158	0.990863	0.991043	[W (N)] and [W (T)] and [B/AA (N)] and [B/AA (T)]
miR-101-3p__mir-101-1__0__+1__22M	hsa-mir-101-1	MI0000103	hsa-miR-101-3p	MIMAT0000099	0	1	65058441	65058462	chr1	-	0	TACAGTACTGTGATAACTGAAG	TACAGTACTGTGATAACTGAAG	not reported	not reported	not reported	1	1	1	1	ACAGTAC	3p	606.762	485.719	1696.37	527.634	0.990147	0.97904	0.98316	0.978861	[W (N)] and [W (T)] and [B/AA (N)] and [B/AA (T)]
miR-101-3p__mir-101-1__0__+1__2MA18MT	hsa-mir-101-1	MI0000103	hsa-miR-101-3p	MIMAT0000099	0	1	65058441	65058462	chr1	-	2	TAAAGTACTGTGATAACTGAAT	TACAGTACTGTGATAACTGAAG	COSV100763220,TCGA=22:G-T	3:C-A	not reported	1	1	1	1	AAAGTAC	3p	4.0261	8.57827	7.461	9.32045	0.75206	0.790039	0.67019	0.784486	[W (N)] and [W (T)] and [B/AA (N)] and [B/AA (T)]
miR-101-3p__mir-101-1__0__+1__2MA19M	hsa-mir-101-1	MI0000103	hsa-miR-101-3p	MIMAT0000099	0	1	65058441	65058462	chr1	-	1	TAAAGTACTGTGATAACTGAAG	TACAGTACTGTGATAACTGAAG	not reported	3:C-A	not reported	1	1	1	1	AAAGTAC	3p	2.10973	3.52989	2.84959	3.485	0.508778	0.606055	0.394841	0.615908	[W (N)] and [W (T)] and [B/AA (N)] and [B/AA (T)]
miR-101-3p__mir-101-1__0__+1__2MGC17MT	hsa-mir-101-1	MI0000103	hsa-miR-101-3p	MIMAT0000099	0	1	65058441	65058462	chr1	-	3	TAGCGTACTGTGATAACTGAAT	TACAGTACTGTGATAACTGAAG	COSV100763220,TCGA=22:G-T	3:C-G;4:A-C	not reported	1	0	1	0	AGCGTAC	3p	2.86611	1.17981	4.47788	1.12614	0.651559	0.0621641	0.558581	0.0750627	[W (N)] and [B/AA (N)]
miR-101-3p__mir-101-1__0__+1__2MGC18M	hsa-mir-101-1	MI0000103	hsa-miR-101-3p	MIMAT0000099	0	1	65058441	65058462	chr1	-	2	TAGCGTACTGTGATAACTGAAG	TACAGTACTGTGATAACTGAAG	not reported	3:C-G;4:A-C	not reported	1	0	0	0	AGCGTAC	3p	1.86578	1.1006	2.68844	1.08208	0.480652	0.0385167	0.30455	0.030455	[B/AA (N)]
miR-101-3p__mir-101-1__0__+1__2MT18MT	hsa-mir-101-1	MI0000103	hsa-miR-101-3p	MIMAT0000099	0	1	65058441	65058462	chr1	-	2	TATAGTACTGTGATAACTGAAT	TACAGTACTGTGATAACTGAAG	COSV100763220,TCGA=22:G-T	3:C-T	not reported	1	0	1	1	ATAGTAC	3p	2.31524	2.12918	3.2431	1.84331	0.559119	0.288965	0.455571	0.381405	[W (N)] and [W (T)] and [B/AA (N)]
miR-101-3p__mir-101-1__0__+1__3MC17MT	hsa-mir-101-1	MI0000103	hsa-miR-101-3p	MIMAT0000099	0	1	65058441	65058462	chr1	-	2	TACCGTACTGTGATAACTGAAT	TACAGTACTGTGATAACTGAAG	COSV100763220,TCGA=22:G-T	4:A-C	not reported	1	0	1	1	ACCGTAC	3p	30.0195	2.01459	76.3818	1.78526	0.932103	0.27517	0.904335	0.340559	[W (N)] and [W (T)] and [B/AA (N)]
miR-101-3p__mir-101-1__0__+1__3MC18M	hsa-mir-101-1	MI0000103	hsa-miR-101-3p	MIMAT0000099	0	1	65058441	65058462	chr1	-	1	TACCGTACTGTGATAACTGAAG	TACAGTACTGTGATAACTGAAG	not reported	4:A-C	not reported	1	0	1	0	ACCGTAC	3p	14.69	1.57357	31.3421	1.41744	0.889824	0.185955	0.85704	0.217843	[W (N)] and [B/AA (N)]
miR-101-3p__mir-101-1__0__+1__4MT16MT	hsa-mir-101-1	MI0000103	hsa-miR-101-3p	MIMAT0000099	0	1	65058441	65058462	chr1	-	2	TACATTACTGTGATAACTGAAT	TACAGTACTGTGATAACTGAAG	COSV100763220,TCGA=22:G-T	5:G-T	not reported	1	0	1	0	ACATTAC	3p	2.14586	1.51256	2.84548	1.89704	0.506808	0.301684	0.409889	0.200466	[W (N)] and [B/AA (N)]
miR-101-3p__mir-101-1__0__+2__21MT1M	hsa-mir-101-1	MI0000103	hsa-miR-101-3p	MIMAT0000099	0	2	65058440	65058462	chr1	-	1	TACAGTACTGTGATAACTGAATG	TACAGTACTGTGATAACTGAAGG	COSV100763220,TCGA=22:G-T	not reported	not reported	1	0	0	0	ACAGTAC	3p	1.84783	1.61081	2.29978	1.65052	0.39699	0.239699	0.298818	0.228413	[B/AA (N)]
miR-101-3p__mir-101-1__0__0__12MC8M	hsa-mir-101-1	MI0000103	hsa-miR-101-3p	MIMAT0000099	0	0	65058442	65058462	chr1	-	1	TACAGTACTGTGCTAACTGAA	TACAGTACTGTGATAACTGAA	not reported	13:A-C	not reported	1	0	1	1	ACAGTAC	3p	5.4595	2.16657	17.4123	1.80822	0.84665	0.281082	0.732891	0.393945	[W (N)] and [W (T)] and [B/AA (N)]
miR-101-3p__mir-101-1__0__0__14MC6M	hsa-mir-101-1	MI0000103	hsa-miR-101-3p	MIMAT0000099	0	0	65058442	65058462	chr1	-	1	TACAGTACTGTGATCACTGAA	TACAGTACTGTGATAACTGAA	not reported	15:A-C	not reported	1	0	0	0	ACAGTAC	3p	1.60251	1.09558	2.02645	1.04401	0.304909	0.017019	0.217126	0.0288427	[B/AA (N)]
miR-101-3p__mir-101-1__0__0__18MT2M	hsa-mir-101-1	MI0000103	hsa-miR-101-3p	MIMAT0000099	0	0	65058442	65058462	chr1	-	1	TACAGTACTGTGATAACTTAA	TACAGTACTGTGATAACTGAA	not reported	19:G-T	not reported	1	0	1	0	ACAGTAC	3p	2.65545	1.25313	3.68424	1.22435	0.603905	0.112863	0.526872	0.108026	[W (N)] and [B/AA (N)]
miR-101-3p__mir-101-1__0__0__1MC19M	hsa-mir-101-1	MI0000103	hsa-miR-101-3p	MIMAT0000099	0	0	65058442	65058462	chr1	-	1	TCCAGTACTGTGATAACTGAA	TACAGTACTGTGATAACTGAA	not reported	2:A-C	not reported	1	0	1	0	CCAGTAC	3p	3.12421	1.35866	6.27631	1.24655	0.723217	0.120924	0.589215	0.150305	[W (N)] and [B/AA (N)]
miR-101-3p__mir-101-1__0__0__1MC1MC17M	hsa-mir-101-1	MI0000103	hsa-miR-101-3p	MIMAT0000099	0	0	65058442	65058462	chr1	-	2	TCCCGTACTGTGATAACTGAA	TACAGTACTGTGATAACTGAA	not reported	2:A-C;4:A-C	not reported	1	0	1	0	CCCGTAC	3p	2.59633	1.16721	4.06317	1.11027	0.626299	0.0546399	0.515765	0.0684343	[W (N)] and [B/AA (N)]
miR-101-3p__mir-101-1__0__0__20MG	hsa-mir-101-1	MI0000103	hsa-miR-101-3p	MIMAT0000099	0	0	65058442	65058462	chr1	-	1	TACAGTACTGTGATAACTGAG	TACAGTACTGTGATAACTGAA	rs1243236452=21:A-G	not reported	not reported	1	1	1	0	ACAGTAC	3p	2.31342	1.87804	2.91303	2.0063	0.518273	0.327481	0.455213	0.29613	[W (N)] and [B/AA (N)] and [B/AA (T)]
miR-101-3p__mir-101-1__0__0__21M	hsa-mir-101-1	MI0000103	hsa-miR-101-3p	MIMAT0000099	0	0	65058442	65058462	chr1	-	0	TACAGTACTGTGATAACTGAA	TACAGTACTGTGATAACTGAA	not reported	not reported	not reported	1	1	1	1	ACAGTAC	3p	678.365	804.023	1992.52	800.294	0.991759	0.984593	0.984235	0.984414	[W (N)] and [W (T)] and [B/AA (N)] and [B/AA (T)]
miR-101-3p__mir-101-1__0__0__2MA18M	hsa-mir-101-1	MI0000103	hsa-miR-101-3p	MIMAT0000099	0	0	65058442	65058462	chr1	-	1	TAAAGTACTGTGATAACTGAA	TACAGTACTGTGATAACTGAA	not reported	3:C-A	not reported	1	1	1	1	AAAGTAC	3p	4.71169	5.93734	10.1237	5.59941	0.792727	0.715514	0.706198	0.73325	[W (N)] and [W (T)] and [B/AA (N)] and [B/AA (T)]
miR-101-3p__mir-101-1__0__0__2MGC17M	hsa-mir-101-1	MI0000103	hsa-miR-101-3p	MIMAT0000099	0	0	65058442	65058462	chr1	-	2	TAGCGTACTGTGATAACTGAA	TACAGTACTGTGATAACTGAA	not reported	3:C-G;4:A-C	not reported	1	0	1	0	AGCGTAC	3p	2.23434	1.14796	3.36709	1.11856	0.57363	0.0576854	0.435686	0.057148	[W (N)] and [B/AA (N)]
miR-101-3p__mir-101-1__0__0__2MT18M	hsa-mir-101-1	MI0000103	hsa-miR-101-3p	MIMAT0000099	0	0	65058442	65058462	chr1	-	1	TATAGTACTGTGATAACTGAA	TACAGTACTGTGATAACTGAA	not reported	3:C-T	not reported	1	0	0	0	ATAGTAC	3p	1.81949	1.60093	2.00996	1.30733	0.298101	0.146363	0.289681	0.225726	[B/AA (N)]
miR-101-3p__mir-101-1__0__0__3MC17M	hsa-mir-101-1	MI0000103	hsa-miR-101-3p	MIMAT0000099	0	0	65058442	65058462	chr1	-	1	TACCGTACTGTGATAACTGAA	TACAGTACTGTGATAACTGAA	not reported	4:A-C	not reported	1	0	1	0	ACCGTAC	3p	17.5988	1.69996	38.4591	1.57988	0.902186	0.224651	0.872626	0.251702	[W (N)] and [B/AA (N)]
miR-101-5p__mir-101-1__-1__-1__22M	hsa-mir-101-1	MI0000103	hsa-miR-101-5p	MIMAT0004513	-1	-1	65058478	65058499	chr1	-	0	TCAGTTATCACAGTGCTGATGC	TCAGTTATCACAGTGCTGATGC	not reported	not reported	not reported	1	1	1	1	CAGTTAT	5p	2.04927	3.028	3.48656	3.10023	0.585812	0.568613	0.369581	0.564672	[W (N)] and [W (T)] and [B/AA (N)] and [B/AA (T)]
miR-101-5p__mir-101-1__-1__-2__21M	hsa-mir-101-1	MI0000103	hsa-miR-101-5p	MIMAT0004513	-1	-2	65058479	65058499	chr1	-	0	TCAGTTATCACAGTGCTGATG	TCAGTTATCACAGTGCTGATG	not reported	not reported	not reported	1	1	1	1	CAGTTAT	5p	3.07623	2.80294	3.95713	2.76337	0.620924	0.522752	0.584737	0.534934	[W (N)] and [W (T)] and [B/AA (N)] and [B/AA (T)]
miR-10392-5p__mir-10392__-1__-4__5MC3MC9MG	hsa-mir-10392	MI0033416	hsa-miR-10392-5p	MIMAT0041615	-1	-4	64878591	64878610	chr11	-	3	GGCGCCTCGCCGGGCTGGGG	GGCGCTTCGACGGGCTGGGC	rs188277933=6:T-C;rs986984479=20:C-G	10:A-C	not reported	1	0	1	0	GCGCCTC	5p	3.14878	1.29837	2.15758	1.17878	0.356682	0.0906485	0.593336	0.127732	[W (N)] and [B/AA (N)]
miR-10392-5p__mir-10392__-1__-5__5MC3MC9M	hsa-mir-10392	MI0033416	hsa-miR-10392-5p	MIMAT0041615	-1	-5	64878592	64878610	chr11	-	2	GGCGCCTCGCCGGGCTGGG	GGCGCTTCGACGGGCTGGG	rs188277933=6:T-C	10:A-C	not reported	0	0	1	0	GCGCCTC	5p	2.64266	1.19664	1.97338	1.10077	0.287531	0.0483698	0.524901	0.0840201	[W (N)]
miR-10392-5p__mir-10392__+3__-2__18M	hsa-mir-10392	MI0033416	hsa-miR-10392-5p	MIMAT0041615	3	-2	64878589	64878606	chr11	-	0	CTTCGACGGGCTGGGCTG	CTTCGACGGGCTGGGCTG	not reported	not reported	not reported	0	0	1	0	TTCGACG	5p	2.17364	1.37901	1.40563	1.25853	0.171444	0.127374	0.41813	0.156933	[W (N)]
miR-10392-5p__mir-10392__+4__0__19M	hsa-mir-10392	MI0033416	hsa-miR-10392-5p	MIMAT0041615	4	0	64878587	64878605	chr11	-	0	TTCGACGGGCTGGGCTGTG	TTCGACGGGCTGGGCTGTG	not reported	not reported	not reported	0	0	1	0	TCGACGG	5p	2.42978	1.48275	1.64289	1.35174	0.222859	0.163741	0.484952	0.190613	[W (N)]
miR-10393-3p__mir-10393__-1__-1__22M	hsa-mir-10393	MI0033417	hsa-miR-10393-3p	MIMAT0041618	-1	-1	44717871	44717892	chr15	+	0	TTGGTCAGATTTGAACTCTTCA	TTGGTCAGATTTGAACTCTTCA	not reported	not reported	not reported	0	1	0	0	TGGTCAG	3p	1.65279	1.6893	1.03533	2.20005	0.0618058	0.394841	0.237549	0.249015	[B/AA (T)]
miR-10396b-3p__mir-10396b__-1__-1__22M	hsa-mir-10396b	MI0033426	hsa-miR-10396b-3p	MIMAT0041636	-1	-1	8436352	8436373	chr21	+	0	GGGCCCCGGGCCCTCGACCGGA	GGGCCCCGGGCCCTCGACCGGA	not reported	not reported	not reported	0	1	0	1	GGCCCCG	3p	1.26963	4.01639	1	5.73696	0.000179147	0.72053	0.119133	0.650663	[W (T)] and [B/AA (T)]
miR-10396b-3p__mir-10396b__-1__-2__21M	hsa-mir-10396b	MI0033426	hsa-miR-10396b-3p	MIMAT0041636	-1	-2	8436352	8436372	chr21	+	0	GGGCCCCGGGCCCTCGACCGG	GGGCCCCGGGCCCTCGACCGG	not reported	not reported	not reported	0	1	0	1	GGCCCCG	3p	1.70257	2.27557	1.25146	2.49576	0.133106	0.471157	0.251164	0.422967	[W (T)] and [B/AA (T)]
miR-10396b-3p__mir-10396b__-1__0__23M	hsa-mir-10396b	MI0033426	hsa-miR-10396b-3p	MIMAT0041636	-1	0	8436352	8436374	chr21	+	0	GGGCCCCGGGCCCTCGACCGGAC	GGGCCCCGGGCCCTCGACCGGAC	not reported	not reported	not reported	0	1	0	1	GGCCCCG	3p	1.2499	2.78554	1	3.84548	0.000179147	0.632032	0.112325	0.532067	[W (T)] and [B/AA (T)]
miR-10397-5p__mir-10397__-1__-2__21M	hsa-mir-10397	MI0033421	hsa-miR-10397-5p	MIMAT0041625	-1	-2	10402363	10402383	chr5	+	0	TTCCTTGACCTGATGCTGTAG	TTCCTTGACCTGATGCTGTAG	not reported	not reported	not reported	0	1	0	0	TCCTTGA	5p	1.69334	1.93367	1.58064	2.3885	0.21211	0.448406	0.248836	0.314224	[B/AA (T)]
miR-10399-3p__mir-10399__-1__-2__20M	hsa-mir-10399	MI0033423	hsa-miR-10399-3p	MIMAT0041630	-1	-2	139044102	139044121	chr7	-	0	TCTCTCGGACAAGCTGTAGG	TCTCTCGGACAAGCTGTAGG	not reported	not reported	not reported	0	0	1	0	CTCTCGG	3p	2.08513	1.95051	1.9114	1.82272	0.276603	0.284307	0.384271	0.318882	[W (N)]
miR-10399-5p__mir-10399__-1__-1__21M	hsa-mir-10399	MI0033423	hsa-miR-10399-5p	MIMAT0041629	-1	-1	139044138	139044158	chr7	-	0	AAATTACAGATTGTCTCAGAG	AAATTACAGATTGTCTCAGAG	not reported	not reported	not reported	1	1	1	1	AATTACA	5p	2.04558	2.67244	2.36024	2.44456	0.411143	0.458438	0.368327	0.511824	[W (N)] and [W (T)] and [B/AA (N)] and [B/AA (T)]
miR-10399-5p__mir-10399__-1__0__22M	hsa-mir-10399	MI0033423	hsa-miR-10399-5p	MIMAT0041629	-1	0	139044137	139044158	chr7	-	0	AAATTACAGATTGTCTCAGAGA	AAATTACAGATTGTCTCAGAGA	not reported	not reported	not reported	1	1	1	1	AATTACA	5p	3.8132	5.52119	5.20776	5.75063	0.685597	0.721247	0.6555	0.719814	[W (N)] and [W (T)] and [B/AA (N)] and [B/AA (T)]
miR-10399-5p__mir-10399__+1__+1__21M	hsa-mir-10399	MI0033423	hsa-miR-10399-5p	MIMAT0041629	1	1	139044136	139044156	chr7	-	0	ATTACAGATTGTCTCAGAGAA	ATTACAGATTGTCTCAGAGAA	not reported	not reported	not reported	1	1	1	1	TTACAGA	5p	2.2387	2.62197	2.42816	2.49837	0.426191	0.47277	0.436582	0.503941	[W (N)] and [W (T)] and [B/AA (N)] and [B/AA (T)]
miR-10399-5p__mir-10399__+1__+2__22M	hsa-mir-10399	MI0033423	hsa-miR-10399-5p	MIMAT0041629	1	2	139044135	139044156	chr7	-	0	ATTACAGATTGTCTCAGAGAAA	ATTACAGATTGTCTCAGAGAAA	not reported	not reported	not reported	1	1	1	1	TTACAGA	5p	2.29697	2.57321	2.60421	2.56043	0.466679	0.486206	0.452168	0.497313	[W (N)] and [W (T)] and [B/AA (N)] and [B/AA (T)]
miR-10399-5p__mir-10399__+1__0__20M	hsa-mir-10399	MI0033423	hsa-miR-10399-5p	MIMAT0041629	1	0	139044137	139044156	chr7	-	0	ATTACAGATTGTCTCAGAGA	ATTACAGATTGTCTCAGAGA	not reported	not reported	not reported	1	1	1	1	TTACAGA	5p	2.89401	3.27239	2.93861	2.82759	0.522214	0.532426	0.562702	0.591365	[W (N)] and [W (T)] and [B/AA (N)] and [B/AA (T)]
miR-10399-5p__mir-10399__+2__+1__20M	hsa-mir-10399	MI0033423	hsa-miR-10399-5p	MIMAT0041629	2	1	139044136	139044155	chr7	-	0	TTACAGATTGTCTCAGAGAA	TTACAGATTGTCTCAGAGAA	not reported	not reported	not reported	1	1	1	1	TACAGAT	5p	3.3692	2.62659	3.76541	2.53583	0.610892	0.481727	0.6177	0.5043	[W (N)] and [W (T)] and [B/AA (N)] and [B/AA (T)]
miR-10399-5p__mir-10399__+2__+2__21M	hsa-mir-10399	MI0033423	hsa-miR-10399-5p	MIMAT0041629	2	2	139044135	139044155	chr7	-	0	TTACAGATTGTCTCAGAGAAA	TTACAGATTGTCTCAGAGAAA	not reported	not reported	not reported	1	1	1	1	TACAGAT	5p	4.9355	3.93834	7.28956	3.72637	0.748656	0.623253	0.714439	0.646184	[W (N)] and [W (T)] and [B/AA (N)] and [B/AA (T)]
miR-10399-5p__mir-10399__+2__+3__22M	hsa-mir-10399	MI0033423	hsa-miR-10399-5p	MIMAT0041629	2	3	139044134	139044155	chr7	-	0	TTACAGATTGTCTCAGAGAAAA	TTACAGATTGTCTCAGAGAAAA	not reported	not reported	not reported	1	0	1	1	TACAGAT	5p	2.12219	2.00201	2.1468	1.89384	0.352741	0.300788	0.401469	0.332856	[W (N)] and [W (T)] and [B/AA (N)]
miR-10399-5p__mir-10399__+2__0__19M	hsa-mir-10399	MI0033423	hsa-miR-10399-5p	MIMAT0041629	2	0	139044137	139044155	chr7	-	0	TTACAGATTGTCTCAGAGA	TTACAGATTGTCTCAGAGA	not reported	not reported	not reported	1	1	1	1	TACAGAT	5p	3.57572	2.92904	3.56169	2.50329	0.594231	0.473665	0.637943	0.554102	[W (N)] and [W (T)] and [B/AA (N)] and [B/AA (T)]
miR-10399-5p__mir-10399__0__-1__20M	hsa-mir-10399	MI0033423	hsa-miR-10399-5p	MIMAT0041629	0	-1	139044138	139044157	chr7	-	0	AATTACAGATTGTCTCAGAG	AATTACAGATTGTCTCAGAG	not reported	not reported	not reported	1	1	1	1	ATTACAG	5p	9.56403	13.8888	14.3424	11.1934	0.828735	0.810641	0.81727	0.835722	[W (N)] and [W (T)] and [B/AA (N)] and [B/AA (T)]
miR-10399-5p__mir-10399__0__-2__19M	hsa-mir-10399	MI0033423	hsa-miR-10399-5p	MIMAT0041629	0	-2	139044139	139044157	chr7	-	0	AATTACAGATTGTCTCAGA	AATTACAGATTGTCTCAGA	not reported	not reported	not reported	1	1	1	1	ATTACAG	5p	2.26839	2.31902	2.23126	2.00178	0.378717	0.324615	0.444106	0.434074	[W (N)] and [W (T)] and [B/AA (N)] and [B/AA (T)]
miR-10399-5p__mir-10399__0__-3__18M	hsa-mir-10399	MI0033423	hsa-miR-10399-5p	MIMAT0041629	0	-3	139044140	139044157	chr7	-	0	AATTACAGATTGTCTCAG	AATTACAGATTGTCTCAG	not reported	not reported	not reported	1	1	0	1	ATTACAG	5p	1.85484	2.97561	2.43619	3.4982	0.428162	0.607668	0.301505	0.558223	[W (T)] and [B/AA (N)] and [B/AA (T)]
miR-10399-5p__mir-10399__0__+1__22M	hsa-mir-10399	MI0033423	hsa-miR-10399-5p	MIMAT0041629	0	1	139044136	139044157	chr7	-	0	AATTACAGATTGTCTCAGAGAA	AATTACAGATTGTCTCAGAGAA	not reported	not reported	not reported	1	1	1	1	ATTACAG	5p	14.1503	20.9627	21.459	19.8535	0.862415	0.861519	0.854174	0.869402	[W (N)] and [W (T)] and [B/AA (N)] and [B/AA (T)]
miR-10399-5p__mir-10399__0__+2__23M	hsa-mir-10399	MI0033423	hsa-miR-10399-5p	MIMAT0041629	0	2	139044135	139044157	chr7	-	0	AATTACAGATTGTCTCAGAGAAA	AATTACAGATTGTCTCAGAGAAA	not reported	not reported	not reported	1	1	1	1	ATTACAG	5p	4.65942	5.22881	6.32095	5.46564	0.72483	0.711752	0.70387	0.707453	[W (N)] and [W (T)] and [B/AA (N)] and [B/AA (T)]
miR-10399-5p__mir-10399__0__0__21M	hsa-mir-10399	MI0033423	hsa-miR-10399-5p	MIMAT0041629	0	0	139044137	139044157	chr7	-	0	AATTACAGATTGTCTCAGAGA	AATTACAGATTGTCTCAGAGA	not reported	not reported	not reported	1	1	1	1	ATTACAG	5p	39.614	56.055	67.8418	49.7638	0.927266	0.919025	0.917951	0.925116	[W (N)] and [W (T)] and [B/AA (N)] and [B/AA (T)]
miR-103a-1-5p__mir-103a-1__0__0__23M	hsa-mir-103a-1	MI0000109	hsa-miR-103a-1-5p	MIMAT0037306	0	0	168560941	168560963	chr5	-	0	GGCTTCTTTACAGTGCTGCCTTG	GGCTTCTTTACAGTGCTGCCTTG	not reported	not reported	not reported	0	1	0	1	GCTTCTT	5p	1.57909	4.63709	1.42867	4.79943	0.177356	0.680939	0.209961	0.684343	[W (T)] and [B/AA (T)]
miR-103a-2-5p__mir-103a-2__0__0__23M	hsa-mir-103a-2	MI0000108	hsa-miR-103a-2-5p	MIMAT0009196	0	0	3917504	3917526	chr20	+	0	AGCTTCTTTACAGTGCTGCCTTG	AGCTTCTTTACAGTGCTGCCTTG	not reported	not reported	not reported	0	1	0	0	GCTTCTT	5p	1.17862	1.92161	1.28071	2.10437	0.13866	0.361877	0.0931566	0.310104	[B/AA (T)]
miR-103a-3p__mir-103a-1__-1__0__24M	hsa-mir-103a-1	MI0000109	hsa-miR-103a-3p	MIMAT0000101	-1	0	168560904	168560927	chr5	-	0	AAGCAGCATTGTACAGGGCTATGA	AAGCAGCATTGTACAGGGCTATGA	not reported	not reported	not reported	1	1	1	1	AGCAGCA	3p	2.15345	2.68216	2.45122	2.68123	0.431745	0.508778	0.412039	0.514869	[W (N)] and [W (T)] and [B/AA (N)] and [B/AA (T)]
miR-103a-3p__mir-103a-1__+1__-1__21M	hsa-mir-103a-1	MI0000109	hsa-miR-103a-3p	MIMAT0000101	1	-1	168560905	168560925	chr5	-	0	GCAGCATTGTACAGGGCTATG	GCAGCATTGTACAGGGCTATG	not reported	not reported	not reported	1	1	1	1	CAGCATT	3p	3.1982	3.62351	4.18016	2.92047	0.635077	0.545145	0.600143	0.623253	[W (N)] and [W (T)] and [B/AA (N)] and [B/AA (T)]
miR-103a-3p__mir-103a-1__+1__0__22M	hsa-mir-103a-1	MI0000109	hsa-miR-103a-3p	MIMAT0000101	1	0	168560904	168560925	chr5	-	0	GCAGCATTGTACAGGGCTATGA	GCAGCATTGTACAGGGCTATGA	not reported	not reported	not reported	1	1	1	1	CAGCATT	3p	11.6954	13.6045	14.1171	11.5761	0.827302	0.814762	0.838767	0.83411	[W (N)] and [W (T)] and [B/AA (N)] and [B/AA (T)]
miR-103a-3p__mir-103a-1__+2__-1__20M	hsa-mir-103a-1	MI0000109	hsa-miR-103a-3p	MIMAT0000101	2	-1	168560905	168560924	chr5	-	0	CAGCATTGTACAGGGCTATG	CAGCATTGTACAGGGCTATG	not reported	not reported	not reported	1	1	1	1	AGCATTG	3p	13.1216	24.0946	19.5205	22.9095	0.854712	0.872089	0.849516	0.879792	[W (N)] and [W (T)] and [B/AA (N)] and [B/AA (T)]
miR-103a-3p__mir-103a-1__+2__-4__17M	hsa-mir-103a-1	MI0000109	hsa-miR-103a-3p	MIMAT0000101	2	-4	168560908	168560924	chr5	-	0	CAGCATTGTACAGGGCT	CAGCATTGTACAGGGCT	not reported	not reported	not reported	1	1	1	1	AGCATTG	3p	3.40951	10.5551	4.27789	15.2156	0.640989	0.841992	0.621641	0.811179	[W (N)] and [W (T)] and [B/AA (N)] and [B/AA (T)]
miR-103a-3p__mir-103a-1__+2__+1__22M	hsa-mir-103a-1	MI0000109	hsa-miR-103a-3p	MIMAT0000101	2	1	168560903	168560924	chr5	-	0	CAGCATTGTACAGGGCTATGAA	CAGCATTGTACAGGGCTATGAA	not reported	not reported	not reported	1	1	1	1	AGCATTG	3p	2.32228	4.57324	3.34265	4.96258	0.570226	0.689	0.456646	0.68076	[W (N)] and [W (T)] and [B/AA (N)] and [B/AA (T)]
miR-103a-3p__mir-103a-1__+2__0__17MC3M	hsa-mir-103a-1	MI0000109	hsa-miR-103a-3p	MIMAT0000101	2	0	168560904	168560924	chr5	-	1	CAGCATTGTACAGGGCTCTGA	CAGCATTGTACAGGGCTATGA	not reported	18:A-C	not reported	1	1	1	1	AGCATTG	3p	2.22863	3.72639	2.94075	3.97763	0.522573	0.641705	0.43497	0.63239	[W (N)] and [W (T)] and [B/AA (N)] and [B/AA (T)]
miR-103a-3p__mir-103a-1__+2__0__21M	hsa-mir-103a-1	MI0000109	hsa-miR-103a-3p	MIMAT0000101	2	0	168560904	168560924	chr5	-	0	CAGCATTGTACAGGGCTATGA	CAGCATTGTACAGGGCTATGA	not reported	not reported	not reported	1	1	1	1	AGCATTG	3p	115.765	227.632	181.694	243.162	0.960229	0.965962	0.953243	0.965604	[W (N)] and [W (T)] and [B/AA (N)] and [B/AA (T)]
miR-103a-3p__mir-103a-1__+3__0__20M	hsa-mir-103a-1	MI0000109	hsa-miR-103a-3p	MIMAT0000101	3	0	168560904	168560923	chr5	-	0	AGCATTGTACAGGGCTATGA	AGCATTGTACAGGGCTATGA	not reported	not reported	not reported	1	1	1	1	GCATTGT	3p	5.69676	5.40243	6.7537	5.00537	0.736833	0.691688	0.741132	0.716052	[W (N)] and [W (T)] and [B/AA (N)] and [B/AA (T)]
miR-103a-3p__mir-103a-1__+4__-1__18M	hsa-mir-103a-1	MI0000109	hsa-miR-103a-3p	MIMAT0000101	4	-1	168560905	168560922	chr5	-	0	GCATTGTACAGGGCTATG	GCATTGTACAGGGCTATG	not reported	not reported	not reported	1	1	1	1	CATTGTA	3p	5.76656	5.29159	7.96076	4.06533	0.759584	0.646184	0.743819	0.709961	[W (N)] and [W (T)] and [B/AA (N)] and [B/AA (T)]
miR-103a-3p__mir-103a-1__+4__0__19M	hsa-mir-103a-1	MI0000109	hsa-miR-103a-3p	MIMAT0000101	4	0	168560904	168560922	chr5	-	0	GCATTGTACAGGGCTATGA	GCATTGTACAGGGCTATGA	not reported	not reported	not reported	1	1	1	1	CATTGTA	3p	49.2726	27.2528	58.0591	18.1509	0.9201	0.856145	0.926012	0.889108	[W (N)] and [W (T)] and [B/AA (N)] and [B/AA (T)]
miR-103a-3p__mir-103a-1__+5__0__18M	hsa-mir-103a-1	MI0000109	hsa-miR-103a-3p	MIMAT0000101	5	0	168560904	168560921	chr5	-	0	CATTGTACAGGGCTATGA	CATTGTACAGGGCTATGA	not reported	not reported	not reported	1	1	1	1	ATTGTAC	3p	9.06848	4.50798	10.5936	2.99382	0.797026	0.554998	0.810104	0.676997	[W (N)] and [W (T)] and [B/AA (N)] and [B/AA (T)]
miR-103a-3p__mir-103a-1__+7__0__16M	hsa-mir-103a-1	MI0000109	hsa-miR-103a-3p	MIMAT0000101	7	0	168560904	168560919	chr5	-	0	TTGTACAGGGCTATGA	TTGTACAGGGCTATGA	not reported	not reported	not reported	1	0	1	1	TGTACAG	3p	2.08228	2.16992	2.03887	1.77718	0.310104	0.27302	0.383196	0.395557	[W (N)] and [W (T)] and [B/AA (N)]
miR-103a-3p__mir-103a-1__0__-1__12MT9M	hsa-mir-103a-1	MI0000109	hsa-miR-103a-3p	MIMAT0000101	0	-1	168560905	168560926	chr5	-	1	AGCAGCATTGTATAGGGCTATG	AGCAGCATTGTACAGGGCTATG	not reported	13:C-T	not reported	1	0	0	0	GCAGCAT	3p	1.76037	1.61357	2.02631	1.50744	0.304729	0.208707	0.270154	0.229308	[B/AA (N)]
miR-103a-3p__mir-103a-1__0__-1__19MC2M	hsa-mir-103a-1	MI0000109	hsa-miR-103a-3p	MIMAT0000101	0	-1	168560905	168560926	chr5	-	1	AGCAGCATTGTACAGGGCTCTG	AGCAGCATTGTACAGGGCTATG	not reported	20:A-C	not reported	0	1	0	1	GCAGCAT	3p	1.00926	2.34125	1.03717	3.03709	0.0698674	0.561627	0.0326048	0.443389	[W (T)] and [B/AA (T)]
miR-103a-3p__mir-103a-1__0__-1__1MT20M	hsa-mir-103a-1	MI0000109	hsa-miR-103a-3p	MIMAT0000101	0	-1	168560905	168560926	chr5	-	1	ATCAGCATTGTACAGGGCTATG	AGCAGCATTGTACAGGGCTATG	not reported	2:G-T	not reported	1	1	1	1	TCAGCAT	3p	3.88987	10.4139	4.62657	10.5716	0.661053	0.803296	0.661412	0.809566	[W (N)] and [W (T)] and [B/AA (N)] and [B/AA (T)]
miR-103a-3p__mir-103a-1__0__-1__22M	hsa-mir-103a-1	MI0000109	hsa-miR-103a-3p	MIMAT0000101	0	-1	168560905	168560926	chr5	-	0	AGCAGCATTGTACAGGGCTATG	AGCAGCATTGTACAGGGCTATG	not reported	not reported	not reported	1	1	1	1	GCAGCAT	3p	1872.96	2144.34	2578.07	2222.84	0.992476	0.992834	0.992476	0.992655	[W (N)] and [W (T)] and [B/AA (N)] and [B/AA (T)]
miR-103a-3p__mir-103a-1__0__-1__2MT19M	hsa-mir-103a-1	MI0000109	hsa-miR-103a-3p	MIMAT0000101	0	-1	168560905	168560926	chr5	-	1	AGTAGCATTGTACAGGGCTATG	AGCAGCATTGTACAGGGCTATG	not reported	3:C-T	not reported	1	0	0	0	GTAGCAT	3p	1.64119	1.39541	2.47961	1.24446	0.43909	0.120029	0.232175	0.163024	[B/AA (N)]
miR-103a-3p__mir-103a-1__0__-1__3MC18M	hsa-mir-103a-1	MI0000109	hsa-miR-103a-3p	MIMAT0000101	0	-1	168560905	168560926	chr5	-	1	AGCCGCATTGTACAGGGCTATG	AGCAGCATTGTACAGGGCTATG	not reported	4:A-C	not reported	1	1	1	1	GCCGCAT	3p	22.1247	2.22517	49.3398	2.03595	0.91383	0.336797	0.886062	0.410785	[W (N)] and [W (T)] and [B/AA (N)] and [B/AA (T)]
miR-103a-3p__mir-103a-1__0__-1__6MC15M	hsa-mir-103a-1	MI0000109	hsa-miR-103a-3p	MIMAT0000101	0	-1	168560905	168560926	chr5	-	1	AGCAGCCTTGTACAGGGCTATG	AGCAGCATTGTACAGGGCTATG	not reported	7:A-C	not reported	0	0	1	0	GCAGCCT	3p	2.43869	1.09541	1.55868	1.08266	0.207453	0.0386958	0.486564	0.0284844	[W (N)]
miR-103a-3p__mir-103a-1__0__-2__1MT19M	hsa-mir-103a-1	MI0000109	hsa-miR-103a-3p	MIMAT0000101	0	-2	168560906	168560926	chr5	-	1	ATCAGCATTGTACAGGGCTAT	AGCAGCATTGTACAGGGCTAT	not reported	2:G-T	not reported	0	1	0	1	TCAGCAT	3p	1.4925	2.6707	1.55896	2.36933	0.207811	0.443927	0.18076	0.510749	[W (T)] and [B/AA (T)]
miR-103a-3p__mir-103a-1__0__-2__3MC17M	hsa-mir-103a-1	MI0000109	hsa-miR-103a-3p	MIMAT0000101	0	-2	168560906	168560926	chr5	-	1	AGCCGCATTGTACAGGGCTAT	AGCAGCATTGTACAGGGCTAT	not reported	4:A-C	not reported	1	0	1	0	GCCGCAT	3p	4.62458	1.36006	7.51898	1.29316	0.752956	0.140631	0.702616	0.1512	[W (N)] and [B/AA (N)]
miR-103a-3p__mir-103a-1__0__-2__3MG17M	hsa-mir-103a-1	MI0000109	hsa-miR-103a-3p	MIMAT0000101	0	-2	168560906	168560926	chr5	-	1	AGCGGCATTGTACAGGGCTAT	AGCAGCATTGTACAGGGCTAT	not reported	4:A-G	not reported	1	0	1	0	GCGGCAT	3p	2.10054	1.2501	3.21522	1.2385	0.555357	0.117879	0.39072	0.106593	[W (N)] and [B/AA (N)]
miR-103a-3p__mir-103a-1__0__-3__20M	hsa-mir-103a-1	MI0000109	hsa-miR-103a-3p	MIMAT0000101	0	-3	168560907	168560926	chr5	-	0	AGCAGCATTGTACAGGGCTA	AGCAGCATTGTACAGGGCTA	not reported	not reported	not reported	1	1	1	1	GCAGCAT	3p	19.9389	20.9206	28.35	20.3305	0.883554	0.862952	0.880509	0.869223	[W (N)] and [W (T)] and [B/AA (N)] and [B/AA (T)]
miR-103a-3p__mir-103a-1__0__-4__19M	hsa-mir-103a-1	MI0000109	hsa-miR-103a-3p	MIMAT0000101	0	-4	168560908	168560926	chr5	-	0	AGCAGCATTGTACAGGGCT	AGCAGCATTGTACAGGGCT	not reported	not reported	not reported	1	1	1	1	GCAGCAT	3p	42.0895	153.036	64.7728	211.17	0.925833	0.961842	0.919921	0.955751	[W (N)] and [W (T)] and [B/AA (N)] and [B/AA (T)]
miR-103a-3p__mir-103a-1__0__-5__18M	hsa-mir-103a-1	MI0000109	hsa-miR-103a-3p	MIMAT0000101	0	-5	168560909	168560926	chr5	-	0	AGCAGCATTGTACAGGGC	AGCAGCATTGTACAGGGC	not reported	not reported	not reported	1	1	1	1	GCAGCAT	3p	5.40187	13.0176	9.33494	14.9276	0.781261	0.840917	0.730921	0.830527	[W (N)] and [W (T)] and [B/AA (N)] and [B/AA (T)]
miR-103a-3p__mir-103a-1__0__+1__13MC10M	hsa-mir-103a-1	MI0000109	hsa-miR-103a-3p	MIMAT0000101	0	1	168560903	168560926	chr5	-	1	AGCAGCATTGTACCGGGCTATGAA	AGCAGCATTGTACAGGGCTATGAA	not reported	14:A-C	not reported	1	0	0	0	GCAGCAT	3p	1.71598	1.26269	2.39042	1.28397	0.417592	0.136689	0.255285	0.112146	[B/AA (N)]
miR-103a-3p__mir-103a-1__0__+1__21MA1MG	hsa-mir-103a-1	MI0000109	hsa-miR-103a-3p	MIMAT0000101	0	1	168560903	168560926	chr5	-	2	AGCAGCATTGTACAGGGCTATAAG	AGCAGCATTGTACAGGGCTATGAA	not reported	22:G-A	29233923=24:A-G	0	1	0	0	GCAGCAT	3p	1.46132	1.87907	1.73091	2.00083	0.240595	0.324077	0.172698	0.296847	[B/AA (T)]
miR-103a-3p__mir-103a-1__0__+1__23MG	hsa-mir-103a-1	MI0000109	hsa-miR-103a-3p	MIMAT0000101	0	1	168560903	168560926	chr5	-	1	AGCAGCATTGTACAGGGCTATGAG	AGCAGCATTGTACAGGGCTATGAA	not reported	not reported	29233923=24:A-G	1	1	1	1	GCAGCAT	3p	10.7861	18.3609	12.7884	21.1006	0.816374	0.865281	0.829452	0.858115	[W (N)] and [W (T)] and [B/AA (N)] and [B/AA (T)]
miR-103a-3p__mir-103a-1__0__+1__23MT	hsa-mir-103a-1	MI0000109	hsa-miR-103a-3p	MIMAT0000101	0	1	168560903	168560926	chr5	-	1	AGCAGCATTGTACAGGGCTATGAT	AGCAGCATTGTACAGGGCTATGAA	TCGA=24:A-T	not reported	not reported	1	1	1	1	GCAGCAT	3p	9.0235	19.7738	10.7857	26.5641	0.799355	0.884271	0.809029	0.863848	[W (N)] and [W (T)] and [B/AA (N)] and [B/AA (T)]
miR-103a-3p__mir-103a-1__0__+1__24M	hsa-mir-103a-1	MI0000109	hsa-miR-103a-3p	MIMAT0000101	0	1	168560903	168560926	chr5	-	0	AGCAGCATTGTACAGGGCTATGAA	AGCAGCATTGTACAGGGCTATGAA	not reported	not reported	not reported	1	1	1	1	GCAGCAT	3p	27.0365	57.5343	34.1329	68.5325	0.895736	0.930133	0.897886	0.926729	[W (N)] and [W (T)] and [B/AA (N)] and [B/AA (T)]
miR-103a-3p__mir-103a-1__0__+1__2MA21M	hsa-mir-103a-1	MI0000109	hsa-miR-103a-3p	MIMAT0000101	0	1	168560903	168560926	chr5	-	1	AGAAGCATTGTACAGGGCTATGAA	AGCAGCATTGTACAGGGCTATGAA	not reported	3:C-A	not reported	0	1	0	0	GAAGCAT	3p	1	1.91764	1	2.12063	0.000179147	0.366894	0.000179147	0.309208	[B/AA (T)]
miR-103a-3p__mir-103a-1__0__+2__22MT2M	hsa-mir-103a-1	MI0000109	hsa-miR-103a-3p	MIMAT0000101	0	2	168560902	168560926	chr5	-	1	AGCAGCATTGTACAGGGCTATGTAG	AGCAGCATTGTACAGGGCTATGAAG	not reported	23:A-T	not reported	0	1	0	1	GCAGCAT	3p	1.53077	2.20442	1.73612	2.05233	0.241849	0.342171	0.194554	0.404694	[W (T)] and [B/AA (T)]
miR-103a-3p__mir-103a-1__0__0__11MG11M	hsa-mir-103a-1	MI0000109	hsa-miR-103a-3p	MIMAT0000101	0	0	168560904	168560926	chr5	-	1	AGCAGCATTGTGCAGGGCTATGA	AGCAGCATTGTACAGGGCTATGA	not reported	12:A-G	not reported	1	1	1	1	GCAGCAT	3p	3.09833	2.6479	3.75327	2.59655	0.609459	0.493372	0.586707	0.506628	[W (N)] and [W (T)] and [B/AA (N)] and [B/AA (T)]
miR-103a-3p__mir-103a-1__0__0__13MC9M	hsa-mir-103a-1	MI0000109	hsa-miR-103a-3p	MIMAT0000101	0	0	168560904	168560926	chr5	-	1	AGCAGCATTGTACCGGGCTATGA	AGCAGCATTGTACAGGGCTATGA	not reported	14:A-C	not reported	1	1	1	1	GCAGCAT	3p	89.5635	5.43086	302.636	3.63047	0.968649	0.616267	0.946614	0.717126	[W (N)] and [W (T)] and [B/AA (N)] and [B/AA (T)]
miR-103a-3p__mir-103a-1__0__0__13MG9M	hsa-mir-103a-1	MI0000109	hsa-miR-103a-3p	MIMAT0000101	0	0	168560904	168560926	chr5	-	1	AGCAGCATTGTACGGGGCTATGA	AGCAGCATTGTACAGGGCTATGA	not reported	14:A-G	not reported	1	1	1	1	GCAGCAT	3p	2.15241	2.72639	3.21949	2.80191	0.556431	0.529022	0.41186	0.522752	[W (N)] and [W (T)] and [B/AA (N)] and [B/AA (T)]
miR-103a-3p__mir-103a-1__0__0__15MT7M	hsa-mir-103a-1	MI0000109	hsa-miR-103a-3p	MIMAT0000101	0	0	168560904	168560926	chr5	-	1	AGCAGCATTGTACAGTGCTATGA	AGCAGCATTGTACAGGGCTATGA	not reported	16:G-T	not reported	1	1	1	0	GCAGCAT	3p	4.19623	1.93331	5.4765	2.17278	0.695271	0.383554	0.682014	0.313687	[W (N)] and [B/AA (N)] and [B/AA (T)]
miR-103a-3p__mir-103a-1__0__0__18MC4M	hsa-mir-103a-1	MI0000109	hsa-miR-103a-3p	MIMAT0000101	0	0	168560904	168560926	chr5	-	1	AGCAGCATTGTACAGGGCCATGA	AGCAGCATTGTACAGGGCTATGA	not reported	19:T-C	not reported	1	1	1	1	GCAGCAT	3p	2.45458	3.05487	3.43922	3.23896	0.581154	0.583124	0.488535	0.568076	[W (N)] and [W (T)] and [B/AA (N)] and [B/AA (T)]
miR-103a-3p__mir-103a-1__0__0__19MC3M	hsa-mir-103a-1	MI0000109	hsa-miR-103a-3p	MIMAT0000101	0	0	168560904	168560926	chr5	-	1	AGCAGCATTGTACAGGGCTCTGA	AGCAGCATTGTACAGGGCTATGA	not reported	20:A-C	not reported	0	1	0	1	GCAGCAT	3p	1.33944	3.84921	1.11093	3.30384	0.0935149	0.590469	0.139914	0.639914	[W (T)] and [B/AA (T)]
miR-103a-3p__mir-103a-1__0__0__1MT1MT19M	hsa-mir-103a-1	MI0000109	hsa-miR-103a-3p	MIMAT0000101	0	0	168560904	168560926	chr5	-	2	ATCTGCATTGTACAGGGCTATGA	AGCAGCATTGTACAGGGCTATGA	not reported	2:G-T;4:A-T	not reported	0	1	0	1	TCTGCAT	3p	1.00487	2.17396	1	2.20687	0.000179147	0.397169	0.0286636	0.396632	[W (T)] and [B/AA (T)]
miR-103a-3p__mir-103a-1__0__0__1MT21M	hsa-mir-103a-1	MI0000109	hsa-miR-103a-3p	MIMAT0000101	0	0	168560904	168560926	chr5	-	1	ATCAGCATTGTACAGGGCTATGA	AGCAGCATTGTACAGGGCTATGA	not reported	2:G-T	not reported	1	1	1	1	TCAGCAT	3p	10.3039	40.3986	16.9541	40.5426	0.844858	0.90756	0.824436	0.909889	[W (N)] and [W (T)] and [B/AA (N)] and [B/AA (T)]
miR-103a-3p__mir-103a-1__0__0__1MT2MC18M	hsa-mir-103a-1	MI0000109	hsa-miR-103a-3p	MIMAT0000101	0	0	168560904	168560926	chr5	-	2	ATCACCATTGTACAGGGCTATGA	AGCAGCATTGTACAGGGCTATGA	not reported	2:G-T;5:G-C	not reported	0	1	0	0	TCACCAT	3p	1	1.01538	1	2.26806	0.000179147	0.416697	0.000179147	0.00268721	[B/AA (T)]
miR-103a-3p__mir-103a-1__0__0__1MTA20M	hsa-mir-103a-1	MI0000109	hsa-miR-103a-3p	MIMAT0000101	0	0	168560904	168560926	chr5	-	2	ATAAGCATTGTACAGGGCTATGA	AGCAGCATTGTACAGGGCTATGA	not reported	2:G-T;3:C-A	not reported	0	1	0	1	TAAGCAT	3p	1.00472	3.67888	1	3.1487	0.000179147	0.573809	0.0284844	0.628807	[W (T)] and [B/AA (T)]
miR-103a-3p__mir-103a-1__0__0__20MA2M	hsa-mir-103a-1	MI0000109	hsa-miR-103a-3p	MIMAT0000101	0	0	168560904	168560926	chr5	-	1	AGCAGCATTGTACAGGGCTAAGA	AGCAGCATTGTACAGGGCTATGA	not reported	21:T-A	not reported	1	1	1	1	GCAGCAT	3p	4.9519	6.59882	6.38898	7.74388	0.726442	0.767109	0.714798	0.750269	[W (N)] and [W (T)] and [B/AA (N)] and [B/AA (T)]
miR-103a-3p__mir-103a-1__0__0__20MC2M	hsa-mir-103a-1	MI0000109	hsa-miR-103a-3p	MIMAT0000101	0	0	168560904	168560926	chr5	-	1	AGCAGCATTGTACAGGGCTACGA	AGCAGCATTGTACAGGGCTATGA	not reported	21:T-C	not reported	0	1	0	1	GCAGCAT	3p	1.85174	2.13845	1.99581	2.47963	0.290935	0.467753	0.300609	0.384092	[W (T)] and [B/AA (T)]
miR-103a-3p__mir-103a-1__0__0__23M	hsa-mir-103a-1	MI0000109	hsa-miR-103a-3p	MIMAT0000101	0	0	168560904	168560926	chr5	-	0	AGCAGCATTGTACAGGGCTATGA	AGCAGCATTGTACAGGGCTATGA	not reported	not reported	not reported	1	1	1	1	GCAGCAT	3p	9275.4	11479.1	12424	12608.4	0.998029	0.998746	0.997671	0.998209	[W (N)] and [W (T)] and [B/AA (N)] and [B/AA (T)]
miR-103a-3p__mir-103a-1__0__0__2MT20M	hsa-mir-103a-1	MI0000109	hsa-miR-103a-3p	MIMAT0000101	0	0	168560904	168560926	chr5	-	1	AGTAGCATTGTACAGGGCTATGA	AGCAGCATTGTACAGGGCTATGA	not reported	3:C-T	not reported	1	1	1	1	GTAGCAT	3p	3.65008	2.71384	8.09906	2.27612	0.761734	0.419742	0.644393	0.52096	[W (N)] and [W (T)] and [B/AA (N)] and [B/AA (T)]
miR-103a-3p__mir-103a-1__0__0__2MTC19M	hsa-mir-103a-1	MI0000109	hsa-miR-103a-3p	MIMAT0000101	0	0	168560904	168560926	chr5	-	2	AGTCGCATTGTACAGGGCTATGA	AGCAGCATTGTACAGGGCTATGA	not reported	3:C-T;4:A-C	not reported	1	0	0	0	GTCGCAT	3p	1.60528	1.10452	2.6371	1.05758	0.473307	0.0238266	0.218918	0.0318882	[B/AA (N)]
miR-103a-3p__mir-103a-1__0__0__3MC19M	hsa-mir-103a-1	MI0000109	hsa-miR-103a-3p	MIMAT0000101	0	0	168560904	168560926	chr5	-	1	AGCCGCATTGTACAGGGCTATGA	AGCAGCATTGTACAGGGCTATGA	not reported	4:A-C	not reported	1	1	1	1	GCCGCAT	3p	86.0762	3.75323	231.597	3.10667	0.963991	0.56933	0.945539	0.634002	[W (N)] and [W (T)] and [B/AA (N)] and [B/AA (T)]
miR-103a-3p__mir-103a-1__0__0__3MC9MC9M	hsa-mir-103a-1	MI0000109	hsa-miR-103a-3p	MIMAT0000101	0	0	168560904	168560926	chr5	-	2	AGCCGCATTGTACCGGGCTATGA	AGCAGCATTGTACAGGGCTATGA	not reported	4:A-C;14:A-C	not reported	1	0	1	0	GCCGCAT	3p	2.93125	1.03783	3.35569	1.06192	0.571659	0.0257972	0.567897	0.00806163	[W (N)] and [B/AA (N)]
miR-103a-3p__mir-103a-1__0__0__4MA18M	hsa-mir-103a-1	MI0000109	hsa-miR-103a-3p	MIMAT0000101	0	0	168560904	168560926	chr5	-	1	AGCAACATTGTACAGGGCTATGA	AGCAGCATTGTACAGGGCTATGA	not reported	5:G-A	not reported	0	1	0	0	GCAACAT	3p	1.52535	1.79701	1.67778	2.99342	0.229846	0.554819	0.191329	0.275708	[B/AA (T)]
miR-103a-3p__mir-103a-1__0__0__4MC18M	hsa-mir-103a-1	MI0000109	hsa-miR-103a-3p	MIMAT0000101	0	0	168560904	168560926	chr5	-	1	AGCACCATTGTACAGGGCTATGA	AGCAGCATTGTACAGGGCTATGA	not reported	5:G-C	not reported	0	1	0	0	GCACCAT	3p	1.28354	1.58783	1.30052	2.93532	0.144393	0.547653	0.122895	0.222859	[B/AA (T)]
miR-103a-3p__mir-103a-1__0__0__5MA17M	hsa-mir-103a-1	MI0000109	hsa-miR-103a-3p	MIMAT0000101	0	0	168560904	168560926	chr5	-	1	AGCAGAATTGTACAGGGCTATGA	AGCAGCATTGTACAGGGCTATGA	not reported	6:C-A	not reported	1	1	1	1	GCAGAAT	3p	3.29969	2.43444	4.83571	2.50879	0.670727	0.475278	0.610713	0.468649	[W (N)] and [W (T)] and [B/AA (N)] and [B/AA (T)]
miR-103a-3p__mir-103a-1__0__0__5MG17M	hsa-mir-103a-1	MI0000109	hsa-miR-103a-3p	MIMAT0000101	0	0	168560904	168560926	chr5	-	1	AGCAGGATTGTACAGGGCTATGA	AGCAGCATTGTACAGGGCTATGA	not reported	6:C-G	not reported	1	0	0	0	GCAGGAT	3p	1.66772	1.33648	2.06391	1.49956	0.322286	0.207094	0.242386	0.14296	[B/AA (N)]
miR-103a-3p__mir-103a-1__0__0__6MC16M	hsa-mir-103a-1	MI0000109	hsa-miR-103a-3p	MIMAT0000101	0	0	168560904	168560926	chr5	-	1	AGCAGCCTTGTACAGGGCTATGA	AGCAGCATTGTACAGGGCTATGA	not reported	7:A-C	not reported	1	0	1	0	GCAGCCT	3p	4.64106	1.2746	2.2813	1.20022	0.392153	0.100143	0.703332	0.117162	[W (N)] and [B/AA (N)]
miR-103a-3p__mir-103a-1__0__0__6MG16M	hsa-mir-103a-1	MI0000109	hsa-miR-103a-3p	MIMAT0000101	0	0	168560904	168560926	chr5	-	1	AGCAGCGTTGTACAGGGCTATGA	AGCAGCATTGTACAGGGCTATGA	not reported	7:A-G	not reported	1	1	1	1	GCAGCGT	3p	2.39757	2.00026	3.24823	2.02668	0.559835	0.333393	0.474561	0.331781	[W (N)] and [W (T)] and [B/AA (N)] and [B/AA (T)]
miR-103a-3p__mir-103a-1__0__0__9MA13M	hsa-mir-103a-1	MI0000109	hsa-miR-103a-3p	MIMAT0000101	0	0	168560904	168560926	chr5	-	1	AGCAGCATTATACAGGGCTATGA	AGCAGCATTGTACAGGGCTATGA	not reported	10:G-A	not reported	0	1	0	1	GCAGCAT	3p	1.69252	2.16946	1.76264	2.07347	0.245969	0.351129	0.248656	0.39502	[W (T)] and [B/AA (T)]
miR-10400-5p__mir-10400__-1__-3__12MA6M	hsa-mir-10400	MI0033424	hsa-miR-10400-5p	MIMAT0041631	-1	-3	144462522	144462540	chr8	-	1	GCGGCGGCGGCGACTCTGG	GCGGCGGCGGCGGCTCTGG	rs1390173406=13:G-A	not reported	not reported	1	1	1	1	CGGCGGC	5p	11.3174	7.23047	8.93005	7.12396	0.774633	0.756539	0.835901	0.761197	[W (N)] and [W (T)] and [B/AA (N)] and [B/AA (T)]
miR-10400-5p__mir-10400__-1__+1__12MA6MA3M	hsa-mir-10400	MI0033424	hsa-miR-10400-5p	MIMAT0041631	-1	1	144462518	144462540	chr8	-	2	GCGGCGGCGGCGACTCTGGACGA	GCGGCGGCGGCGGCTCTGGGCGA	rs1390173406=13:G-A	20:G-A	not reported	1	0	1	0	CGGCGGC	5p	2.01916	1.10635	2.1152	1.10943	0.341276	0.0537442	0.35919	0.0331422	[W (N)] and [B/AA (N)]
miR-10400-5p__mir-10400__-1__0__12MA6MA2M	hsa-mir-10400	MI0033424	hsa-miR-10400-5p	MIMAT0041631	-1	0	144462519	144462540	chr8	-	2	GCGGCGGCGGCGACTCTGGACG	GCGGCGGCGGCGGCTCTGGGCG	rs1390173406=13:G-A	20:G-A	not reported	1	1	1	1	CGGCGGC	5p	24.3783	11.5801	15.9952	10.0853	0.838051	0.798818	0.891974	0.820853	[W (N)] and [W (T)] and [B/AA (N)] and [B/AA (T)]
miR-10400-5p__mir-10400__-2__-3__13MA6M	hsa-mir-10400	MI0033424	hsa-miR-10400-5p	MIMAT0041631	-2	-3	144462522	144462541	chr8	-	1	GGCGGCGGCGGCGACTCTGG	GGCGGCGGCGGCGGCTCTGG	rs1390173406=14:G-A	not reported	not reported	1	1	1	1	GCGGCGG	5p	54.3082	9.1425	35.3656	7.77767	0.897886	0.767288	0.930133	0.793981	[W (N)] and [W (T)] and [B/AA (N)] and [B/AA (T)]
miR-10400-5p__mir-10400__-2__-3__13MC6M	hsa-mir-10400	MI0033424	hsa-miR-10400-5p	MIMAT0041631	-2	-3	144462522	144462541	chr8	-	1	GGCGGCGGCGGCGCCTCTGG	GGCGGCGGCGGCGGCTCTGG	not reported	14:G-C	not reported	1	0	0	0	GCGGCGG	5p	1.90313	1.06153	2.43987	1.04173	0.429416	0.0154067	0.317986	0.0148692	[B/AA (N)]
miR-10400-5p__mir-10400__-2__+1__13MA6MA3M	hsa-mir-10400	MI0033424	hsa-miR-10400-5p	MIMAT0041631	-2	1	144462518	144462541	chr8	-	2	GGCGGCGGCGGCGACTCTGGACGA	GGCGGCGGCGGCGGCTCTGGGCGA	rs1390173406=14:G-A	21:G-A	not reported	1	0	1	0	GCGGCGG	5p	4.15725	1.17795	4.73066	1.15576	0.665711	0.0781082	0.679685	0.0738087	[W (N)] and [B/AA (N)]
miR-10400-5p__mir-10400__-2__+2__13MA6MA4M	hsa-mir-10400	MI0033424	hsa-miR-10400-5p	MIMAT0041631	-2	2	144462517	144462541	chr8	-	2	GGCGGCGGCGGCGACTCTGGACGAG	GGCGGCGGCGGCGGCTCTGGGCGAG	rs1390173406=14:G-A	21:G-A	not reported	1	0	1	0	GCGGCGG	5p	2.40214	1.09402	2.50726	1.07556	0.445898	0.0338588	0.477248	0.0274095	[W (N)] and [B/AA (N)]
miR-10400-5p__mir-10400__-2__0__13MA6MA2M	hsa-mir-10400	MI0033424	hsa-miR-10400-5p	MIMAT0041631	-2	0	144462519	144462541	chr8	-	2	GGCGGCGGCGGCGACTCTGGACG	GGCGGCGGCGGCGGCTCTGGGCG	rs1390173406=14:G-A	21:G-A	not reported	1	1	1	1	GCGGCGG	5p	132.524	20.8022	101.106	22.2831	0.942673	0.869402	0.957005	0.867968	[W (N)] and [W (T)] and [B/AA (N)] and [B/AA (T)]
miR-10400-5p__mir-10400__-2__0__13MC6MA2M	hsa-mir-10400	MI0033424	hsa-miR-10400-5p	MIMAT0041631	-2	0	144462519	144462541	chr8	-	2	GGCGGCGGCGGCGCCTCTGGACG	GGCGGCGGCGGCGGCTCTGGGCG	not reported	14:G-C;21:G-A	not reported	1	0	1	0	GCGGCGG	5p	3.547	1.14252	6.1704	1.15364	0.719455	0.0768542	0.635794	0.0537442	[W (N)] and [B/AA (N)]
miR-10400-5p__mir-10400__+1__+1__10MA6MA3M	hsa-mir-10400	MI0033424	hsa-miR-10400-5p	MIMAT0041631	1	1	144462518	144462538	chr8	-	2	GGCGGCGGCGACTCTGGACGA	GGCGGCGGCGGCTCTGGGCGA	rs1390173406=11:G-A	18:G-A	not reported	1	0	1	0	GCGGCGG	5p	3.02378	1.14833	3.8872	1.14776	0.617162	0.0723755	0.579004	0.0578646	[W (N)] and [B/AA (N)]
miR-10400-5p__mir-10400__+1__+2__10MA6MA4M	hsa-mir-10400	MI0033424	hsa-miR-10400-5p	MIMAT0041631	1	2	144462517	144462538	chr8	-	2	GGCGGCGGCGACTCTGGACGAG	GGCGGCGGCGGCTCTGGGCGAG	rs1390173406=11:G-A	18:G-A	not reported	1	0	1	0	GCGGCGG	5p	2.10745	1.06227	2.36952	1.05736	0.412576	0.0236474	0.393766	0.0150484	[W (N)] and [B/AA (N)]
miR-10400-5p__mir-10400__+1__0__10MA6MA2M	hsa-mir-10400	MI0033424	hsa-miR-10400-5p	MIMAT0041631	1	0	144462519	144462538	chr8	-	2	GGCGGCGGCGACTCTGGACG	GGCGGCGGCGGCTCTGGGCG	rs1390173406=11:G-A	18:G-A	not reported	1	1	1	1	GCGGCGG	5p	62.3847	7.6254	51.525	6.85215	0.915263	0.750985	0.934611	0.768721	[W (N)] and [W (T)] and [B/AA (N)] and [B/AA (T)]
miR-10400-5p__mir-10400__+2__+1__9MA6MA3M	hsa-mir-10400	MI0033424	hsa-miR-10400-5p	MIMAT0041631	2	1	144462518	144462537	chr8	-	2	GCGGCGGCGACTCTGGACGA	GCGGCGGCGGCTCTGGGCGA	rs1390173406=10:G-A	17:G-A	not reported	1	0	1	0	CGGCGGC	5p	2.84027	1.34047	2.50955	1.26824	0.446972	0.131315	0.553923	0.144572	[W (N)] and [B/AA (N)]
miR-10400-5p__mir-10400__+2__+2__9MA6MA4M	hsa-mir-10400	MI0033424	hsa-miR-10400-5p	MIMAT0041631	2	2	144462517	144462537	chr8	-	2	GCGGCGGCGACTCTGGACGAG	GCGGCGGCGGCTCTGGGCGAG	rs1390173406=10:G-A	17:G-A	not reported	1	0	1	0	CGGCGGC	5p	3.24518	1.12966	4.25845	1.04301	0.640093	0.0159441	0.604801	0.0481906	[W (N)] and [B/AA (N)]
miR-10400-5p__mir-10400__+2__0__9MA6MA2M	hsa-mir-10400	MI0033424	hsa-miR-10400-5p	MIMAT0041631	2	0	144462519	144462537	chr8	-	2	GCGGCGGCGACTCTGGACG	GCGGCGGCGGCTCTGGGCG	rs1390173406=10:G-A	17:G-A	not reported	1	1	1	1	CGGCGGC	5p	34.5397	32.8205	25.7186	24.0194	0.877822	0.87603	0.91186	0.89914	[W (N)] and [W (T)] and [B/AA (N)] and [B/AA (T)]
miR-10400-5p__mir-10400__+3__+2__8MA6MA4M	hsa-mir-10400	MI0033424	hsa-miR-10400-5p	MIMAT0041631	3	2	144462517	144462536	chr8	-	2	CGGCGGCGACTCTGGACGAG	CGGCGGCGGCTCTGGGCGAG	rs1390173406=9:G-A	16:G-A	not reported	1	0	0	0	GGCGGCG	5p	1.83354	1.0681	2.0187	1.01776	0.301505	0.00591186	0.293981	0.0164815	[B/AA (N)]
miR-10400-5p__mir-10400__+3__0__8MA6MA2M	hsa-mir-10400	MI0033424	hsa-miR-10400-5p	MIMAT0041631	3	0	144462519	144462536	chr8	-	2	CGGCGGCGACTCTGGACG	CGGCGGCGGCTCTGGGCG	rs1390173406=9:G-A	16:G-A	not reported	1	1	1	1	GGCGGCG	5p	30.8273	15.141	21.5585	9.90409	0.862952	0.797026	0.906485	0.843246	[W (N)] and [W (T)] and [B/AA (N)] and [B/AA (T)]
miR-10400-5p__mir-10400__+4__0__7MA6MA2M	hsa-mir-10400	MI0033424	hsa-miR-10400-5p	MIMAT0041631	4	0	144462519	144462535	chr8	-	2	GGCGGCGACTCTGGACG	GGCGGCGGCTCTGGGCG	rs1390173406=8:G-A	15:G-A	not reported	1	1	1	1	GCGGCGA	5p	5.52063	2.69692	5.16658	2.59126	0.683984	0.492118	0.735041	0.517556	[W (N)] and [W (T)] and [B/AA (N)] and [B/AA (T)]
miR-10400-5p__mir-10400__+5__0__6MA6MA2M	hsa-mir-10400	MI0033424	hsa-miR-10400-5p	MIMAT0041631	5	0	144462519	144462534	chr8	-	2	GCGGCGACTCTGGACG	GCGGCGGCTCTGGGCG	rs1390173406=7:G-A	14:G-A	not reported	1	1	1	1	CGGCGAC	5p	13.6079	12.9666	11.9759	9.24522	0.809566	0.789144	0.852204	0.82981	[W (N)] and [W (T)] and [B/AA (N)] and [B/AA (T)]
miR-10400-5p__mir-10400__0__-3__11MA6M	hsa-mir-10400	MI0033424	hsa-miR-10400-5p	MIMAT0041631	0	-3	144462522	144462539	chr8	-	1	CGGCGGCGGCGACTCTGG	CGGCGGCGGCGGCTCTGG	rs1390173406=12:G-A	not reported	not reported	1	1	1	1	GGCGGCG	5p	65.47	20.9974	55.855	18.7036	0.918667	0.857399	0.937119	0.869581	[W (N)] and [W (T)] and [B/AA (N)] and [B/AA (T)]
miR-10400-5p__mir-10400__0__-5__T10MA4M	hsa-mir-10400	MI0033424	hsa-miR-10400-5p	MIMAT0041631	0	-5	144462524	144462539	chr8	-	2	TGGCGGCGGCGACTCT	CGGCGGCGGCGGCTCT	rs1316623234=1:C-T;rs1390173406=12:G-A	not reported	not reported	0	0	1	0	GGCGGCG	5p	2.14941	1.09306	1.99599	1.05386	0.291293	0.0220351	0.411322	0.0268721	[W (N)]
miR-10400-5p__mir-10400__0__+1__11MA6MA3M	hsa-mir-10400	MI0033424	hsa-miR-10400-5p	MIMAT0041631	0	1	144462518	144462539	chr8	-	2	CGGCGGCGGCGACTCTGGACGA	CGGCGGCGGCGGCTCTGGGCGA	rs1390173406=12:G-A	19:G-A	not reported	1	0	1	0	GGCGGCG	5p	2.35866	1.14349	2.41711	1.06287	0.424042	0.0259764	0.464887	0.0544608	[W (N)] and [B/AA (N)]
miR-10400-5p__mir-10400__0__+2__11MA6MA4M	hsa-mir-10400	MI0033424	hsa-miR-10400-5p	MIMAT0041631	0	2	144462517	144462539	chr8	-	2	CGGCGGCGGCGACTCTGGACGAG	CGGCGGCGGCGGCTCTGGGCGAG	rs1390173406=12:G-A	19:G-A	not reported	1	0	1	0	GGCGGCG	5p	2.00437	1.08742	2.02316	1.04968	0.303117	0.0193479	0.353637	0.0245432	[W (N)] and [B/AA (N)]
miR-10400-5p__mir-10400__0__0__11MA6MA2M	hsa-mir-10400	MI0033424	hsa-miR-10400-5p	MIMAT0041631	0	0	144462519	144462539	chr8	-	2	CGGCGGCGGCGACTCTGGACG	CGGCGGCGGCGGCTCTGGGCG	rs1390173406=12:G-A	19:G-A	not reported	1	1	1	1	GGCGGCG	5p	116.887	28.5628	76.0522	17.2435	0.931566	0.852024	0.953601	0.891974	[W (N)] and [W (T)] and [B/AA (N)] and [B/AA (T)]
miR-10400-5p__mir-10400__0__0__T10MA6MA2M	hsa-mir-10400	MI0033424	hsa-miR-10400-5p	MIMAT0041631	0	0	144462519	144462539	chr8	-	3	TGGCGGCGGCGACTCTGGACG	CGGCGGCGGCGGCTCTGGGCG	rs1316623234=1:C-T;rs1390173406=12:G-A	19:G-A	not reported	1	0	1	0	GGCGGCG	5p	2.8427	1.22493	2.09487	1.1467	0.33411	0.0714798	0.554819	0.0963812	[W (N)] and [B/AA (N)]
miR-10401-3p__mir-10401__-1__-1__21M	hsa-mir-10401	MI0033425	hsa-miR-10401-3p	MIMAT0041634	-1	-1	8206597	8206617	chr21	+	0	GACCTCGCCGTCCCGCCCGCC	GACCTCGCCGTCCCGCCCGCC	not reported	not reported	not reported	0	1	1	1	ACCTCGC	3p	3.0979	8.76445	1.48905	8.59504	0.190254	0.778395	0.586528	0.788248	[W (N)] and [W (T)] and [B/AA (T)]
miR-10401-3p__mir-10401__-1__-2__20M	hsa-mir-10401	MI0033425	hsa-miR-10401-3p	MIMAT0041634	-1	-2	8206597	8206616	chr21	+	0	GACCTCGCCGTCCCGCCCGC	GACCTCGCCGTCCCGCCCGC	not reported	not reported	not reported	0	1	1	1	ACCTCGC	3p	2.13302	3.45804	1.14468	3.84768	0.105518	0.632569	0.404515	0.609817	[W (N)] and [W (T)] and [B/AA (T)]
miR-10401-3p__mir-10401__-1__0__22M	hsa-mir-10401	MI0033425	hsa-miR-10401-3p	MIMAT0041634	-1	0	8206597	8206618	chr21	+	0	GACCTCGCCGTCCCGCCCGCCG	GACCTCGCCGTCCCGCCCGCCG	not reported	not reported	not reported	0	1	0	1	ACCTCGC	3p	1.56574	2.07967	1.05687	2.14225	0.0764959	0.373701	0.204765	0.36349	[W (T)] and [B/AA (T)]
miR-105-5p__mir-105-1__+2__-1__20M	hsa-mir-105-1	MI0000111	hsa-miR-105-5p	MIMAT0000102	2	-1	152392266	152392285	chrX	-	0	AAATGCTCAGACTCCTGTGG	AAATGCTCAGACTCCTGTGG	not reported	not reported	not reported	0	1	0	0	AATGCTC	5p	1	1.64534	1.11834	2.2748	0.0962021	0.419205	0.000179147	0.23737	[B/AA (T)]
miR-105-5p__mir-105-1__0__-1__22M	hsa-mir-105-1	MI0000111	hsa-miR-105-5p	MIMAT0000102	0	-1	152392266	152392287	chrX	-	0	TCAAATGCTCAGACTCCTGTGG	TCAAATGCTCAGACTCCTGTGG	not reported	not reported	not reported	0	1	0	1	CAAATGC	5p	1.14301	2.80886	1.44056	4.94764	0.179685	0.688105	0.0838409	0.535292	[W (T)] and [B/AA (T)]
miR-105-5p__mir-105-1__0__0__23M	hsa-mir-105-1	MI0000111	hsa-miR-105-5p	MIMAT0000102	0	0	152392265	152392287	chrX	-	0	TCAAATGCTCAGACTCCTGTGGT	TCAAATGCTCAGACTCCTGTGGT	not reported	not reported	not reported	0	1	0	1	CAAATGC	5p	1.04479	2.14485	1.05241	3.43908	0.0738087	0.601576	0.051057	0.385346	[W (T)] and [B/AA (T)]
miR-106a-5p__mir-106a__0__0__23M	hsa-mir-106a	MI0000113	hsa-miR-106a-5p	MIMAT0000103	0	0	134170244	134170266	chrX	-	0	AAAAGTGCTTACAGTGCAGGTAG	AAAAGTGCTTACAGTGCAGGTAG	not reported	not reported	not reported	1	1	0	1	AAAGTGC	5p	1.95861	2.78657	3.0988	3.25179	0.54192	0.584199	0.340201	0.532426	[W (T)] and [B/AA (N)] and [B/AA (T)]
miR-106b-3p__mir-106b__-1__-1__22M	hsa-mir-106b	MI0000734	hsa-miR-106b-3p	MIMAT0004672	-1	-1	100094003	100094024	chr7	-	0	ACCGCACTGTGGGTACTTGCTG	ACCGCACTGTGGGTACTTGCTG	not reported	not reported	not reported	1	1	1	1	CCGCACT	3p	5.9406	8.99111	4.38355	9.47658	0.647259	0.791473	0.749731	0.792189	[W (N)] and [W (T)] and [B/AA (N)] and [B/AA (T)]
miR-106b-3p__mir-106b__-1__-2__21M	hsa-mir-106b	MI0000734	hsa-miR-106b-3p	MIMAT0004672	-1	-2	100094004	100094024	chr7	-	0	ACCGCACTGTGGGTACTTGCT	ACCGCACTGTGGGTACTTGCT	not reported	not reported	not reported	1	1	1	1	CCGCACT	3p	2.40192	2.17188	2.4012	2.27815	0.420459	0.4201	0.47689	0.396095	[W (N)] and [W (T)] and [B/AA (N)] and [B/AA (T)]
miR-106b-3p__mir-106b__-1__-3__20M	hsa-mir-106b	MI0000734	hsa-miR-106b-3p	MIMAT0004672	-1	-3	100094005	100094024	chr7	-	0	ACCGCACTGTGGGTACTTGC	ACCGCACTGTGGGTACTTGC	not reported	not reported	not reported	1	0	0	0	CCGCACT	3p	1.88099	1.71046	2.07541	1.81009	0.327123	0.281619	0.310283	0.254568	[B/AA (N)]
miR-106b-3p__mir-106b__-2__-1__23M	hsa-mir-106b	MI0000734	hsa-miR-106b-3p	MIMAT0004672	-2	-1	100094003	100094025	chr7	-	0	TACCGCACTGTGGGTACTTGCTG	TACCGCACTGTGGGTACTTGCTG	not reported	not reported	not reported	1	1	0	1	ACCGCAC	3p	1.60001	2.25387	2.03895	2.56631	0.310283	0.487818	0.215693	0.418488	[W (T)] and [B/AA (N)] and [B/AA (T)]
miR-106b-3p__mir-106b__-2__-2__22M	hsa-mir-106b	MI0000734	hsa-miR-106b-3p	MIMAT0004672	-2	-2	100094004	100094025	chr7	-	0	TACCGCACTGTGGGTACTTGCT	TACCGCACTGTGGGTACTTGCT	not reported	not reported	not reported	1	1	1	1	ACCGCAC	3p	5.3683	7.16479	6.70943	9.21558	0.735041	0.788606	0.730025	0.76048	[W (N)] and [W (T)] and [B/AA (N)] and [B/AA (T)]
miR-106b-3p__mir-106b__-2__-3__21M	hsa-mir-106b	MI0000734	hsa-miR-106b-3p	MIMAT0004672	-2	-3	100094005	100094025	chr7	-	0	TACCGCACTGTGGGTACTTGC	TACCGCACTGTGGGTACTTGC	not reported	not reported	not reported	1	1	1	1	ACCGCAC	3p	4.91499	7.82917	6.00791	10.025	0.713902	0.797922	0.713364	0.771946	[W (N)] and [W (T)] and [B/AA (N)] and [B/AA (T)]
miR-106b-3p__mir-106b__0__-1__13MC7M	hsa-mir-106b	MI0000734	hsa-miR-106b-3p	MIMAT0004672	0	-1	100094003	100094023	chr7	-	1	CCGCACTGTGGGTCCTTGCTG	CCGCACTGTGGGTACTTGCTG	not reported	14:A-C	not reported	1	0	1	0	CGCACTG	3p	3.22399	1.41794	3.87359	1.41055	0.616625	0.183268	0.60301	0.170369	[W (N)] and [B/AA (N)]
miR-106b-3p__mir-106b__0__-1__1MA19M	hsa-mir-106b	MI0000734	hsa-miR-106b-3p	MIMAT0004672	0	-1	100094003	100094023	chr7	-	1	CAGCACTGTGGGTACTTGCTG	CCGCACTGTGGGTACTTGCTG	TCGA=2:C-A	not reported	not reported	1	0	1	0	AGCACTG	3p	2.21264	1.51037	3.14396	1.37582	0.547295	0.17019	0.430133	0.200107	[W (N)] and [B/AA (N)]
miR-106b-3p__mir-106b__0__-1__21M	hsa-mir-106b	MI0000734	hsa-miR-106b-3p	MIMAT0004672	0	-1	100094003	100094023	chr7	-	0	CCGCACTGTGGGTACTTGCTG	CCGCACTGTGGGTACTTGCTG	not reported	not reported	not reported	1	1	1	1	CGCACTG	3p	110.12	204.631	85.1072	213.777	0.936224	0.962379	0.950914	0.962737	[W (N)] and [W (T)] and [B/AA (N)] and [B/AA (T)]
miR-106b-3p__mir-106b__0__-2__13MC6M	hsa-mir-106b	MI0000734	hsa-miR-106b-3p	MIMAT0004672	0	-2	100094004	100094023	chr7	-	1	CCGCACTGTGGGTCCTTGCT	CCGCACTGTGGGTACTTGCT	not reported	14:A-C	not reported	1	0	0	0	CGCACTG	3p	1.87778	1.12051	2.76595	1.15067	0.494626	0.0745253	0.308492	0.0435328	[B/AA (N)]
miR-106b-3p__mir-106b__0__-2__20M	hsa-mir-106b	MI0000734	hsa-miR-106b-3p	MIMAT0004672	0	-2	100094004	100094023	chr7	-	0	CCGCACTGTGGGTACTTGCT	CCGCACTGTGGGTACTTGCT	not reported	not reported	not reported	1	1	1	1	CGCACTG	3p	30.2273	25.4759	25.8293	26.4912	0.87818	0.883554	0.905231	0.884271	[W (N)] and [W (T)] and [B/AA (N)] and [B/AA (T)]
miR-106b-3p__mir-106b__0__-3__19M	hsa-mir-106b	MI0000734	hsa-miR-106b-3p	MIMAT0004672	0	-3	100094005	100094023	chr7	-	0	CCGCACTGTGGGTACTTGC	CCGCACTGTGGGTACTTGC	not reported	not reported	not reported	1	1	1	1	CGCACTG	3p	9.03256	7.62727	9.25047	6.85776	0.779828	0.751164	0.809566	0.7689	[W (N)] and [W (T)] and [B/AA (N)] and [B/AA (T)]
miR-106b-3p__mir-106b__0__-4__18M	hsa-mir-106b	MI0000734	hsa-miR-106b-3p	MIMAT0004672	0	-4	100094006	100094023	chr7	-	0	CCGCACTGTGGGTACTTG	CCGCACTGTGGGTACTTG	not reported	not reported	not reported	1	1	1	1	CGCACTG	3p	3.83482	4.21857	3.64371	4.31489	0.601218	0.662128	0.657112	0.659799	[W (N)] and [W (T)] and [B/AA (N)] and [B/AA (T)]
miR-106b-3p__mir-106b__0__0__21MT	hsa-mir-106b	MI0000734	hsa-miR-106b-3p	MIMAT0004672	0	0	100094002	100094023	chr7	-	1	CCGCACTGTGGGTACTTGCTGT	CCGCACTGTGGGTACTTGCTGC	rs1199111202=22:C-T	not reported	not reported	1	1	1	1	CGCACTG	3p	4.81555	9.30085	3.931	11.6709	0.619491	0.815478	0.709244	0.795056	[W (N)] and [W (T)] and [B/AA (N)] and [B/AA (T)]
miR-106b-3p__mir-106b__0__0__22M	hsa-mir-106b	MI0000734	hsa-miR-106b-3p	MIMAT0004672	0	0	100094002	100094023	chr7	-	0	CCGCACTGTGGGTACTTGCTGC	CCGCACTGTGGGTACTTGCTGC	not reported	not reported	not reported	1	1	1	1	CGCACTG	3p	6.46193	5.23266	6.44479	5.65808	0.727696	0.717485	0.761734	0.707632	[W (N)] and [W (T)] and [B/AA (N)] and [B/AA (T)]
miR-106b-5p__mir-106b__0__-1__16MT3M	hsa-mir-106b	MI0000734	hsa-miR-106b-5p	MIMAT0000680	0	-1	100094044	100094063	chr7	-	1	TAAAGTGCTGACAGTGTAGA	TAAAGTGCTGACAGTGCAGA	not reported	17:C-T	not reported	1	1	1	1	AAAGTGC	5p	7.72939	2.75006	11.3492	2.83691	0.802938	0.533142	0.78789	0.52723	[W (N)] and [W (T)] and [B/AA (N)] and [B/AA (T)]
miR-106b-5p__mir-106b__0__-1__20M	hsa-mir-106b	MI0000734	hsa-miR-106b-5p	MIMAT0000680	0	-1	100094044	100094063	chr7	-	0	TAAAGTGCTGACAGTGCAGA	TAAAGTGCTGACAGTGCAGA	not reported	not reported	not reported	1	1	1	1	AAAGTGC	5p	31.0013	20.328	63.1295	22.7041	0.924937	0.870835	0.906664	0.865281	[W (N)] and [W (T)] and [B/AA (N)] and [B/AA (T)]
miR-106b-5p__mir-106b__0__-1__3MC16M	hsa-mir-106b	MI0000734	hsa-miR-106b-5p	MIMAT0000680	0	-1	100094044	100094063	chr7	-	1	TAACGTGCTGACAGTGCAGA	TAAAGTGCTGACAGTGCAGA	not reported	4:A-C	not reported	1	0	0	0	AACGTGC	5p	1.68966	1.06609	2.06526	1.09038	0.322465	0.042637	0.24794	0.015765	[B/AA (N)]
miR-106b-5p__mir-106b__0__-2__16MT2M	hsa-mir-106b	MI0000734	hsa-miR-106b-5p	MIMAT0000680	0	-2	100094045	100094063	chr7	-	1	TAAAGTGCTGACAGTGTAG	TAAAGTGCTGACAGTGCAG	not reported	17:C-T	not reported	1	0	1	0	AAAGTGC	5p	2.88106	1.71873	3.76253	1.73287	0.610176	0.26263	0.560373	0.257435	[W (N)] and [B/AA (N)]
miR-106b-5p__mir-106b__0__-2__19M	hsa-mir-106b	MI0000734	hsa-miR-106b-5p	MIMAT0000680	0	-2	100094045	100094063	chr7	-	0	TAAAGTGCTGACAGTGCAG	TAAAGTGCTGACAGTGCAG	not reported	not reported	not reported	1	1	1	1	AAAGTGC	5p	10.7563	15.9172	20.1141	15.5683	0.857399	0.844142	0.829094	0.848083	[W (N)] and [W (T)] and [B/AA (N)] and [B/AA (T)]
miR-106b-5p__mir-106b__0__-4__17M	hsa-mir-106b	MI0000734	hsa-miR-106b-5p	MIMAT0000680	0	-4	100094047	100094063	chr7	-	0	TAAAGTGCTGACAGTGC	TAAAGTGCTGACAGTGC	not reported	not reported	not reported	1	1	1	1	AAAGTGC	5p	5.05643	11.7974	8.29472	17.8434	0.76478	0.855249	0.718739	0.822286	[W (N)] and [W (T)] and [B/AA (N)] and [B/AA (T)]
miR-106b-5p__mir-106b__0__-5__16M	hsa-mir-106b	MI0000734	hsa-miR-106b-5p	MIMAT0000680	0	-5	100094048	100094063	chr7	-	0	TAAAGTGCTGACAGTG	TAAAGTGCTGACAGTG	not reported	not reported	not reported	1	1	1	1	AAAGTGC	5p	2.38191	2.75096	3.31739	2.82244	0.567359	0.531888	0.470262	0.527589	[W (N)] and [W (T)] and [B/AA (N)] and [B/AA (T)]
miR-106b-5p__mir-106b__0__+1__17MC4M	hsa-mir-106b	MI0000734	hsa-miR-106b-5p	MIMAT0000680	0	1	100094042	100094063	chr7	-	1	TAAAGTGCTGACAGTGCCGATA	TAAAGTGCTGACAGTGCAGATA	rs1291518205=18:A-C	not reported	not reported	0	1	0	0	AAAGTGC	5p	1.35303	1.88752	1.39808	2.03878	0.168398	0.338051	0.144214	0.299713	[B/AA (T)]
miR-106b-5p__mir-106b__0__+1__20MA1M	hsa-mir-106b	MI0000734	hsa-miR-106b-5p	MIMAT0000680	0	1	100094042	100094063	chr7	-	1	TAAAGTGCTGACAGTGCAGAAA	TAAAGTGCTGACAGTGCAGATA	TCGA=21:T-A	not reported	not reported	1	1	1	1	AAAGTGC	5p	2.55213	2.86489	3.52197	3.36841	0.589932	0.595665	0.508062	0.544249	[W (N)] and [W (T)] and [B/AA (N)] and [B/AA (T)]
miR-106b-5p__mir-106b__0__+1__22M	hsa-mir-106b	MI0000734	hsa-miR-106b-5p	MIMAT0000680	0	1	100094042	100094063	chr7	-	0	TAAAGTGCTGACAGTGCAGATA	TAAAGTGCTGACAGTGCAGATA	not reported	not reported	not reported	1	1	1	1	AAAGTGC	5p	32.0085	71.0844	62.6286	84.4158	0.924221	0.937836	0.908277	0.934074	[W (N)] and [W (T)] and [B/AA (N)] and [B/AA (T)]
miR-106b-5p__mir-106b__0__+1__2MC19M	hsa-mir-106b	MI0000734	hsa-miR-106b-5p	MIMAT0000680	0	1	100094042	100094063	chr7	-	1	TACAGTGCTGACAGTGCAGATA	TAAAGTGCTGACAGTGCAGATA	not reported	3:A-C	not reported	0	1	0	1	ACAGTGC	5p	1	2.81934	1	3.8656	0.000179147	0.633823	0.000179147	0.5378	[W (T)] and [B/AA (T)]
miR-106b-5p__mir-106b__0__+1__3MC18M	hsa-mir-106b	MI0000734	hsa-miR-106b-5p	MIMAT0000680	0	1	100094042	100094063	chr7	-	1	TAACGTGCTGACAGTGCAGATA	TAAAGTGCTGACAGTGCAGATA	not reported	4:A-C	not reported	1	0	0	0	AACGTGC	5p	1.87907	1.14251	2.10292	1.18652	0.337155	0.0951272	0.309029	0.053565	[B/AA (N)]
miR-106b-5p__mir-106b__0__+2__23M	hsa-mir-106b	MI0000734	hsa-miR-106b-5p	MIMAT0000680	0	2	100094041	100094063	chr7	-	0	TAAAGTGCTGACAGTGCAGATAG	TAAAGTGCTGACAGTGCAGATAG	not reported	not reported	not reported	1	1	0	1	AAAGTGC	5p	1.61862	2.31663	2.0159	2.47097	0.300251	0.465066	0.223934	0.433536	[W (T)] and [B/AA (N)] and [B/AA (T)]
miR-106b-5p__mir-106b__0__0__17MC3M	hsa-mir-106b	MI0000734	hsa-miR-106b-5p	MIMAT0000680	0	0	100094043	100094063	chr7	-	1	TAAAGTGCTGACAGTGCCGAT	TAAAGTGCTGACAGTGCAGAT	rs1291518205=18:A-C	not reported	not reported	1	1	0	1	AAAGTGC	5p	1.52242	2.22339	2.43979	2.62135	0.429237	0.49785	0.190254	0.410068	[W (T)] and [B/AA (N)] and [B/AA (T)]
miR-106b-5p__mir-106b__0__0__20MA	hsa-mir-106b	MI0000734	hsa-miR-106b-5p	MIMAT0000680	0	0	100094043	100094063	chr7	-	1	TAAAGTGCTGACAGTGCAGAA	TAAAGTGCTGACAGTGCAGAT	TCGA=21:T-A	not reported	not reported	1	1	1	1	AAAGTGC	5p	3.06103	3.47776	5.61904	4.00059	0.700824	0.643139	0.582587	0.612325	[W (N)] and [W (T)] and [B/AA (N)] and [B/AA (T)]
miR-106b-5p__mir-106b__0__0__21M	hsa-mir-106b	MI0000734	hsa-miR-106b-5p	MIMAT0000680	0	0	100094043	100094063	chr7	-	0	TAAAGTGCTGACAGTGCAGAT	TAAAGTGCTGACAGTGCAGAT	not reported	not reported	not reported	1	1	1	1	AAAGTGC	5p	40.2623	87.3016	81.6056	104.192	0.935149	0.944643	0.918667	0.940165	[W (N)] and [W (T)] and [B/AA (N)] and [B/AA (T)]
miR-106b-5p__mir-106b__0__0__2MC18M	hsa-mir-106b	MI0000734	hsa-miR-106b-5p	MIMAT0000680	0	0	100094043	100094063	chr7	-	1	TACAGTGCTGACAGTGCAGAT	TAAAGTGCTGACAGTGCAGAT	not reported	3:A-C	not reported	0	1	0	1	ACAGTGC	5p	1	3.07965	1	4.01296	0.000179147	0.644393	0.000179147	0.570405	[W (T)] and [B/AA (T)]
miR-106b-5p__mir-106b__0__0__3MC17M	hsa-mir-106b	MI0000734	hsa-miR-106b-5p	MIMAT0000680	0	0	100094043	100094063	chr7	-	1	TAACGTGCTGACAGTGCAGAT	TAAAGTGCTGACAGTGCAGAT	not reported	4:A-C	not reported	1	0	0	0	AACGTGC	5p	1.88056	1.17165	2.58895	1.1886	0.463096	0.0962021	0.310104	0.0704049	[B/AA (N)]
miR-107__mir-107__+2__-2__19M	hsa-mir-107	MI0000114	hsa-miR-107	MIMAT0000104	2	-2	89592758	89592776	chr10	-	0	CAGCATTGTACAGGGCTAT	CAGCATTGTACAGGGCTAT	not reported	not reported	not reported	0	1	0	0	AGCATTG	3p	1.40027	1.99468	1.48437	2.13257	0.189538	0.370477	0.15747	0.330348	[B/AA (T)]
miR-107__mir-107__0__-1__21MA	hsa-mir-107	MI0000114	hsa-miR-107	MIMAT0000104	0	-1	89592757	89592778	chr10	-	1	AGCAGCATTGTACAGGGCTATA	AGCAGCATTGTACAGGGCTATC	TCGA=22:C-A	not reported	not reported	1	1	1	1	GCAGCAT	3p	25.407	31.581	31.245	30.7349	0.889645	0.894303	0.894482	0.896811	[W (N)] and [W (T)] and [B/AA (N)] and [B/AA (T)]
miR-107__mir-107__0__-1__22M	hsa-mir-107	MI0000114	hsa-miR-107	MIMAT0000104	0	-1	89592757	89592778	chr10	-	0	AGCAGCATTGTACAGGGCTATC	AGCAGCATTGTACAGGGCTATC	not reported	not reported	not reported	1	1	1	1	GCAGCAT	3p	3.77002	5.56706	4.10541	5.79305	0.629703	0.722143	0.653171	0.721247	[W (N)] and [W (T)] and [B/AA (N)] and [B/AA (T)]
miR-107__mir-107__0__-2__13MC7M	hsa-mir-107	MI0000114	hsa-miR-107	MIMAT0000104	0	-2	89592758	89592778	chr10	-	1	AGCAGCATTGTACCGGGCTAT	AGCAGCATTGTACAGGGCTAT	not reported	14:A-C	not reported	1	0	1	0	GCAGCAT	3p	8.39463	1.7215	18.2448	1.84345	0.849516	0.289144	0.799713	0.257972	[W (N)] and [B/AA (N)]
miR-107__mir-107__0__-2__21M	hsa-mir-107	MI0000114	hsa-miR-107	MIMAT0000104	0	-2	89592758	89592778	chr10	-	0	AGCAGCATTGTACAGGGCTAT	AGCAGCATTGTACAGGGCTAT	not reported	not reported	not reported	1	1	1	1	GCAGCAT	3p	291.291	259.685	402.852	272.922	0.974382	0.968291	0.973665	0.968112	[W (N)] and [W (T)] and [B/AA (N)] and [B/AA (T)]
miR-107__mir-107__0__-2__2MA18M	hsa-mir-107	MI0000114	hsa-miR-107	MIMAT0000104	0	-2	89592758	89592778	chr10	-	1	AGAAGCATTGTACAGGGCTAT	AGCAGCATTGTACAGGGCTAT	not reported	3:C-A	not reported	0	1	0	1	GAAGCAT	3p	1.09486	2.46424	1.03413	2.27918	0.0600143	0.420996	0.0686134	0.475815	[W (T)] and [B/AA (T)]
miR-107__mir-107__0__-3__13MC6M	hsa-mir-107	MI0000114	hsa-miR-107	MIMAT0000104	0	-3	89592759	89592778	chr10	-	1	AGCAGCATTGTACCGGGCTA	AGCAGCATTGTACAGGGCTA	not reported	14:A-C	not reported	1	0	0	0	GCAGCAT	3p	1.59468	1.0682	2.21344	1.04007	0.372805	0.0146901	0.215156	0.0166607	[B/AA (N)]
miR-107__mir-107__0__-3__3MC16M	hsa-mir-107	MI0000114	hsa-miR-107	MIMAT0000104	0	-3	89592759	89592778	chr10	-	1	AGCCGCATTGTACAGGGCTA	AGCAGCATTGTACAGGGCTA	not reported	4:A-C	not reported	1	0	0	0	GCCGCAT	3p	1.82682	1.11073	2.70074	1.12046	0.482264	0.058402	0.292189	0.0369043	[B/AA (N)]
miR-107__mir-107__0__-4__13MC5M	hsa-mir-107	MI0000114	hsa-miR-107	MIMAT0000104	0	-4	89592760	89592778	chr10	-	1	AGCAGCATTGTACCGGGCT	AGCAGCATTGTACAGGGCT	not reported	14:A-C	not reported	1	0	1	0	GCAGCAT	3p	2.12186	1.72277	3.614	1.70224	0.59871	0.254568	0.40129	0.25833	[W (N)] and [B/AA (N)]
miR-107__mir-107__0__-4__2MA16M	hsa-mir-107	MI0000114	hsa-miR-107	MIMAT0000104	0	-4	89592760	89592778	chr10	-	1	AGAAGCATTGTACAGGGCT	AGCAGCATTGTACAGGGCT	not reported	3:C-A	not reported	0	1	0	1	GAAGCAT	3p	1.05212	2.02978	1.03577	2.0147	0.063239	0.32981	0.0546399	0.348262	[W (T)] and [B/AA (T)]
miR-107__mir-107__0__-4__3MC15M	hsa-mir-107	MI0000114	hsa-miR-107	MIMAT0000104	0	-4	89592760	89592778	chr10	-	1	AGCCGCATTGTACAGGGCT	AGCAGCATTGTACAGGGCT	not reported	4:A-C	not reported	1	0	0	0	GCCGCAT	3p	1.67812	1.15363	2.024	1.16339	0.303655	0.0836618	0.244894	0.0614475	[B/AA (N)]
miR-107__mir-107__0__-6__17M	hsa-mir-107	MI0000114	hsa-miR-107	MIMAT0000104	0	-6	89592762	89592778	chr10	-	0	AGCAGCATTGTACAGGG	AGCAGCATTGTACAGGG	not reported	not reported	not reported	1	1	1	1	GCAGCAT	3p	14.7683	30.1139	24.6186	41.8517	0.874418	0.90971	0.857936	0.894661	[W (N)] and [W (T)] and [B/AA (N)] and [B/AA (T)]
miR-107__mir-107__0__-7__13MC2M	hsa-mir-107	MI0000114	hsa-miR-107	MIMAT0000104	0	-7	89592763	89592778	chr10	-	1	AGCAGCATTGTACCGG	AGCAGCATTGTACAGG	not reported	14:A-C	not reported	1	0	1	0	GCAGCAT	3p	3.63901	1.50454	8.05564	1.35578	0.760659	0.164995	0.643497	0.198137	[W (N)] and [B/AA (N)]
miR-107__mir-107__0__-7__16M	hsa-mir-107	MI0000114	hsa-miR-107	MIMAT0000104	0	-7	89592763	89592778	chr10	-	0	AGCAGCATTGTACAGG	AGCAGCATTGTACAGG	not reported	not reported	not reported	1	1	1	1	GCAGCAT	3p	90.1995	79.5686	119.231	69.9013	0.94948	0.931745	0.946793	0.937657	[W (N)] and [W (T)] and [B/AA (N)] and [B/AA (T)]
miR-107__mir-107__0__0__23M	hsa-mir-107	MI0000114	hsa-miR-107	MIMAT0000104	0	0	89592756	89592778	chr10	-	0	AGCAGCATTGTACAGGGCTATCA	AGCAGCATTGTACAGGGCTATCA	not reported	not reported	not reported	1	1	1	1	GCAGCAT	3p	3.02018	4.47567	3.86976	5.0386	0.616446	0.693658	0.578466	0.675385	[W (N)] and [W (T)] and [B/AA (N)] and [B/AA (T)]
miR-10a-3p__mir-10a__0__-1__21M	hsa-mir-10a	MI0000266	hsa-miR-10a-3p	MIMAT0004555	0	-1	48579865	48579885	chr17	-	0	CAAATTCGTATCTAGGGGAAT	CAAATTCGTATCTAGGGGAAT	not reported	not reported	not reported	1	1	0	1	AAATTCG	3p	1.79627	2.37023	2.23693	2.4164	0.380509	0.454497	0.282515	0.451093	[W (T)] and [B/AA (N)] and [B/AA (T)]
miR-10a-5p__mir-10a__-1__-1__17MC5M	hsa-mir-10a	MI0000266	hsa-miR-10a-5p	MIMAT0000253	-1	-1	48579905	48579927	chr17	-	1	ATACCCTGTAGATCCGACTTTGT	ATACCCTGTAGATCCGAATTTGT	not reported	18:A-C	not reported	0	1	0	1	TACCCTG	5p	1.32776	2.23322	1.3691	2.19473	0.160874	0.393587	0.135435	0.413114	[W (T)] and [B/AA (T)]
miR-10a-5p__mir-10a__-1__-1__22MA	hsa-mir-10a	MI0000266	hsa-miR-10a-5p	MIMAT0000253	-1	-1	48579905	48579927	chr17	-	1	ATACCCTGTAGATCCGAATTTGA	ATACCCTGTAGATCCGAATTTGT	rs529115879=23:T-A	not reported	not reported	1	1	1	1	TACCCTG	5p	2.36817	2.82656	2.67323	2.46006	0.477786	0.462558	0.467933	0.539412	[W (N)] and [W (T)] and [B/AA (N)] and [B/AA (T)]
miR-10a-5p__mir-10a__-1__-1__23M	hsa-mir-10a	MI0000266	hsa-miR-10a-5p	MIMAT0000253	-1	-1	48579905	48579927	chr17	-	0	ATACCCTGTAGATCCGAATTTGT	ATACCCTGTAGATCCGAATTTGT	not reported	not reported	not reported	1	1	1	1	TACCCTG	5p	27.9239	60.4247	37.2254	55.1702	0.901111	0.924221	0.89914	0.92852	[W (N)] and [W (T)] and [B/AA (N)] and [B/AA (T)]
miR-10a-5p__mir-10a__-1__-1__2MC20M	hsa-mir-10a	MI0000266	hsa-miR-10a-5p	MIMAT0000253	-1	-1	48579905	48579927	chr17	-	1	ATCCCCTGTAGATCCGAATTTGT	ATACCCTGTAGATCCGAATTTGT	not reported	3:A-C	not reported	0	1	0	1	TCCCCTG	5p	1	2.27914	1	2.60435	0.000179147	0.494626	0.000179147	0.424579	[W (T)] and [B/AA (T)]
miR-10a-5p__mir-10a__-1__-1__3MA19M	hsa-mir-10a	MI0000266	hsa-miR-10a-5p	MIMAT0000253	-1	-1	48579905	48579927	chr17	-	1	ATAACCTGTAGATCCGAATTTGT	ATACCCTGTAGATCCGAATTTGT	not reported	4:C-A	not reported	1	0	0	0	TAACCTG	5p	1.78103	1.1672	2.35259	1.13446	0.408635	0.0662845	0.277857	0.0682551	[B/AA (N)]
miR-10a-5p__mir-10a__-1__-2__22M	hsa-mir-10a	MI0000266	hsa-miR-10a-5p	MIMAT0000253	-1	-2	48579906	48579927	chr17	-	0	ATACCCTGTAGATCCGAATTTG	ATACCCTGTAGATCCGAATTTG	not reported	not reported	not reported	1	1	1	1	TACCCTG	5p	24.0796	42.3376	33.8386	38.8225	0.895199	0.906306	0.891258	0.912576	[W (N)] and [W (T)] and [B/AA (N)] and [B/AA (T)]
miR-10a-5p__mir-10a__-1__-2__2MC19M	hsa-mir-10a	MI0000266	hsa-miR-10a-5p	MIMAT0000253	-1	-2	48579906	48579927	chr17	-	1	ATCCCCTGTAGATCCGAATTTG	ATACCCTGTAGATCCGAATTTG	not reported	3:A-C	not reported	0	1	0	1	TCCCCTG	5p	1	2.00388	1	2.07189	0.000179147	0.35077	0.000179147	0.333572	[W (T)] and [B/AA (T)]
miR-10a-5p__mir-10a__-1__-3__21M	hsa-mir-10a	MI0000266	hsa-miR-10a-5p	MIMAT0000253	-1	-3	48579907	48579927	chr17	-	0	ATACCCTGTAGATCCGAATTT	ATACCCTGTAGATCCGAATTT	not reported	not reported	not reported	1	1	1	1	TACCCTG	5p	6.14068	7.35316	6.98479	6.70647	0.741491	0.748298	0.755106	0.763526	[W (N)] and [W (T)] and [B/AA (N)] and [B/AA (T)]
miR-10a-5p__mir-10a__-1__-7__17M	hsa-mir-10a	MI0000266	hsa-miR-10a-5p	MIMAT0000253	-1	-7	48579911	48579927	chr17	-	0	ATACCCTGTAGATCCGA	ATACCCTGTAGATCCGA	not reported	not reported	not reported	1	1	1	1	TACCCTG	5p	2.88343	7.6463	3.62744	8.71439	0.600143	0.78144	0.560552	0.769617	[W (N)] and [W (T)] and [B/AA (N)] and [B/AA (T)]
miR-10a-5p__mir-10a__+1__-1__11MT9M	hsa-mir-10a	MI0000266	hsa-miR-10a-5p	MIMAT0000253	1	-1	48579905	48579925	chr17	-	1	ACCCTGTAGATTCGAATTTGT	ACCCTGTAGATCCGAATTTGT	COSV100203706,TCGA,rs369632753=12:C-T	not reported	not reported	1	1	1	1	CCCTGTA	5p	3.84895	2.72275	4.06838	2.49704	0.627015	0.471874	0.658545	0.522214	[W (N)] and [W (T)] and [B/AA (N)] and [B/AA (T)]
miR-10a-5p__mir-10a__+1__-1__12MT8M	hsa-mir-10a	MI0000266	hsa-miR-10a-5p	MIMAT0000253	1	-1	48579905	48579925	chr17	-	1	ACCCTGTAGATCTGAATTTGT	ACCCTGTAGATCCGAATTTGT	rs985848773=13:C-T	not reported	not reported	1	1	1	1	CCCTGTA	5p	2.98193	2.4483	2.82577	2.2197	0.5043	0.400573	0.573988	0.472053	[W (N)] and [W (T)] and [B/AA (N)] and [B/AA (T)]
miR-10a-5p__mir-10a__+1__-1__14MG6M	hsa-mir-10a	MI0000266	hsa-miR-10a-5p	MIMAT0000253	1	-1	48579905	48579925	chr17	-	1	ACCCTGTAGATCCGGATTTGT	ACCCTGTAGATCCGAATTTGT	not reported	15:A-G	not reported	1	0	1	0	CCCTGTA	5p	2.05662	1.74977	2.42293	1.57383	0.425296	0.22268	0.372626	0.263884	[W (N)] and [B/AA (N)]
miR-10a-5p__mir-10a__+1__-1__15MC5M	hsa-mir-10a	MI0000266	hsa-miR-10a-5p	MIMAT0000253	1	-1	48579905	48579925	chr17	-	1	ACCCTGTAGATCCGACTTTGT	ACCCTGTAGATCCGAATTTGT	not reported	16:A-C	not reported	1	0	1	0	CCCTGTA	5p	2.518	1.32071	2.04577	1.14699	0.314224	0.0718381	0.501075	0.136152	[W (N)] and [B/AA (N)]
miR-10a-5p__mir-10a__+1__-1__16MA4M	hsa-mir-10a	MI0000266	hsa-miR-10a-5p	MIMAT0000253	1	-1	48579905	48579925	chr17	-	1	ACCCTGTAGATCCGAAATTGT	ACCCTGTAGATCCGAATTTGT	not reported	17:T-A	not reported	1	1	1	1	CCCTGTA	5p	4.24074	3.92659	4.52875	3.68391	0.654425	0.621104	0.684343	0.644572	[W (N)] and [W (T)] and [B/AA (N)] and [B/AA (T)]
miR-10a-5p__mir-10a__+1__-1__1MA19M	hsa-mir-10a	MI0000266	hsa-miR-10a-5p	MIMAT0000253	1	-1	48579905	48579925	chr17	-	1	AACCTGTAGATCCGAATTTGT	ACCCTGTAGATCCGAATTTGT	not reported	2:C-A	not reported	1	1	1	1	ACCTGTA	5p	14.8957	2.94572	34.9118	2.32754	0.89699	0.434074	0.859369	0.554819	[W (N)] and [W (T)] and [B/AA (N)] and [B/AA (T)]
miR-10a-5p__mir-10a__+1__-1__1MA1MA17M	hsa-mir-10a	MI0000266	hsa-miR-10a-5p	MIMAT0000253	1	-1	48579905	48579925	chr17	-	2	AACATGTAGATCCGAATTTGT	ACCCTGTAGATCCGAATTTGT	not reported	2:C-A;4:C-A	not reported	1	0	1	0	ACATGTA	5p	4.84096	1.54938	9.40463	1.4082	0.783053	0.182551	0.710856	0.211035	[W (N)] and [B/AA (N)]
miR-10a-5p__mir-10a__+1__-1__1MAG18M	hsa-mir-10a	MI0000266	hsa-miR-10a-5p	MIMAT0000253	1	-1	48579905	48579925	chr17	-	2	AAGCTGTAGATCCGAATTTGT	ACCCTGTAGATCCGAATTTGT	not reported	2:C-A;3:C-G	not reported	1	0	1	0	AGCTGTA	5p	3.98915	1.51513	8.27148	1.33841	0.764421	0.15765	0.667324	0.201362	[W (N)] and [B/AA (N)]
miR-10a-5p__mir-10a__+1__-1__1MT19M	hsa-mir-10a	MI0000266	hsa-miR-10a-5p	MIMAT0000253	1	-1	48579905	48579925	chr17	-	1	ATCCTGTAGATCCGAATTTGT	ACCCTGTAGATCCGAATTTGT	rs770328167=2:C-T	not reported	not reported	1	0	0	0	TCCTGTA	5p	1.91071	1.98508	2.00288	1.82287	0.294339	0.284486	0.320853	0.32766	[B/AA (N)]
miR-10a-5p__mir-10a__+1__-1__20MA	hsa-mir-10a	MI0000266	hsa-miR-10a-5p	MIMAT0000253	1	-1	48579905	48579925	chr17	-	1	ACCCTGTAGATCCGAATTTGA	ACCCTGTAGATCCGAATTTGT	rs529115879=21:T-A	not reported	not reported	1	1	1	1	CCCTGTA	5p	32.9763	24.9382	39.4086	22.114	0.90344	0.869043	0.90971	0.882121	[W (N)] and [W (T)] and [B/AA (N)] and [B/AA (T)]
miR-10a-5p__mir-10a__+1__-1__21M	hsa-mir-10a	MI0000266	hsa-miR-10a-5p	MIMAT0000253	1	-1	48579905	48579925	chr17	-	0	ACCCTGTAGATCCGAATTTGT	ACCCTGTAGATCCGAATTTGT	not reported	not reported	not reported	1	1	1	1	CCCTGTA	5p	2656.61	3251.67	3182.24	2916.49	0.993013	0.994446	0.99373	0.994805	[W (N)] and [W (T)] and [B/AA (N)] and [B/AA (T)]
miR-10a-5p__mir-10a__+1__-1__2MA18M	hsa-mir-10a	MI0000266	hsa-miR-10a-5p	MIMAT0000253	1	-1	48579905	48579925	chr17	-	1	ACACTGTAGATCCGAATTTGT	ACCCTGTAGATCCGAATTTGT	TCGA=3:C-A	not reported	not reported	0	1	0	1	CACTGTA	5p	1.3842	9.42899	1.29643	10.5461	0.14278	0.80258	0.151917	0.797026	[W (T)] and [B/AA (T)]
miR-10a-5p__mir-10a__+1__-1__2MT18M	hsa-mir-10a	MI0000266	hsa-miR-10a-5p	MIMAT0000253	1	-1	48579905	48579925	chr17	-	1	ACTCTGTAGATCCGAATTTGT	ACCCTGTAGATCCGAATTTGT	not reported	3:C-T	not reported	1	0	1	1	CTCTGTA	5p	2.16294	2.19568	2.60564	1.78001	0.466858	0.273558	0.414368	0.402186	[W (N)] and [W (T)] and [B/AA (N)]
miR-10a-5p__mir-10a__+1__-1__3MA17M	hsa-mir-10a	MI0000266	hsa-miR-10a-5p	MIMAT0000253	1	-1	48579905	48579925	chr17	-	1	ACCATGTAGATCCGAATTTGT	ACCCTGTAGATCCGAATTTGT	not reported	4:C-A	not reported	1	0	1	0	CCATGTA	5p	9.74559	1.98464	13.6911	1.78728	0.822644	0.275528	0.818882	0.327481	[W (N)] and [B/AA (N)]
miR-10a-5p__mir-10a__+1__-1__3MT17M	hsa-mir-10a	MI0000266	hsa-miR-10a-5p	MIMAT0000253	1	-1	48579905	48579925	chr17	-	1	ACCTTGTAGATCCGAATTTGT	ACCCTGTAGATCCGAATTTGT	TCGA=4:C-T	not reported	not reported	0	1	0	1	CCTTGTA	5p	1.36751	2.85558	1.53337	2.53935	0.201362	0.482264	0.147259	0.543533	[W (T)] and [B/AA (T)]
miR-10a-5p__mir-10a__+1__-2__12MT7M	hsa-mir-10a	MI0000266	hsa-miR-10a-5p	MIMAT0000253	1	-2	48579906	48579925	chr17	-	1	ACCCTGTAGATCTGAATTTG	ACCCTGTAGATCCGAATTTG	rs985848773=13:C-T	not reported	not reported	1	0	1	0	CCCTGTA	5p	2.23809	1.6377	2.46554	1.57156	0.435507	0.221784	0.436224	0.235758	[W (N)] and [B/AA (N)]
miR-10a-5p__mir-10a__+1__-2__1MA18M	hsa-mir-10a	MI0000266	hsa-miR-10a-5p	MIMAT0000253	1	-2	48579906	48579925	chr17	-	1	AACCTGTAGATCCGAATTTG	ACCCTGTAGATCCGAATTTG	not reported	2:C-A	not reported	1	0	1	0	ACCTGTA	5p	5.4766	1.82015	10.7761	1.58	0.799176	0.22483	0.733429	0.281799	[W (N)] and [B/AA (N)]
miR-10a-5p__mir-10a__+1__-2__1MA1MA16M	hsa-mir-10a	MI0000266	hsa-miR-10a-5p	MIMAT0000253	1	-2	48579906	48579925	chr17	-	2	AACATGTAGATCCGAATTTG	ACCCTGTAGATCCGAATTTG	not reported	2:C-A;4:C-A	not reported	1	0	0	0	ACATGTA	5p	1.8588	1.20805	2.83491	1.16012	0.505016	0.0811537	0.302759	0.0892153	[B/AA (N)]
miR-10a-5p__mir-10a__+1__-2__1MAG17M	hsa-mir-10a	MI0000266	hsa-miR-10a-5p	MIMAT0000253	1	-2	48579906	48579925	chr17	-	2	AAGCTGTAGATCCGAATTTG	ACCCTGTAGATCCGAATTTG	not reported	2:C-A;3:C-G	not reported	1	0	1	0	AGCTGTA	5p	2.70006	1.29865	4.89503	1.22776	0.673594	0.114296	0.534396	0.12809	[W (N)] and [B/AA (N)]
miR-10a-5p__mir-10a__+1__-2__20M	hsa-mir-10a	MI0000266	hsa-miR-10a-5p	MIMAT0000253	1	-2	48579906	48579925	chr17	-	0	ACCCTGTAGATCCGAATTTG	ACCCTGTAGATCCGAATTTG	not reported	not reported	not reported	1	1	1	1	CCCTGTA	5p	320.833	395.888	391.551	350.361	0.973665	0.973665	0.975815	0.976711	[W (N)] and [W (T)] and [B/AA (N)] and [B/AA (T)]
miR-10a-5p__mir-10a__+1__-2__2MA17M	hsa-mir-10a	MI0000266	hsa-miR-10a-5p	MIMAT0000253	1	-2	48579906	48579925	chr17	-	1	ACACTGTAGATCCGAATTTG	ACCCTGTAGATCCGAATTTG	TCGA=3:C-A	not reported	not reported	0	1	0	1	CACTGTA	5p	1.06601	2.92741	1	2.85196	0.000179147	0.534575	0.0601935	0.553744	[W (T)] and [B/AA (T)]
miR-10a-5p__mir-10a__+1__-2__3MA16M	hsa-mir-10a	MI0000266	hsa-miR-10a-5p	MIMAT0000253	1	-2	48579906	48579925	chr17	-	1	ACCATGTAGATCCGAATTTG	ACCCTGTAGATCCGAATTTG	not reported	4:C-A	not reported	1	0	1	0	CCATGTA	5p	2.49812	1.25867	2.79722	1.23196	0.500896	0.11555	0.496775	0.110713	[W (N)] and [B/AA (N)]
miR-10a-5p__mir-10a__+1__-3__19M	hsa-mir-10a	MI0000266	hsa-miR-10a-5p	MIMAT0000253	1	-3	48579907	48579925	chr17	-	0	ACCCTGTAGATCCGAATTT	ACCCTGTAGATCCGAATTT	not reported	not reported	not reported	1	1	1	1	CCCTGTA	5p	54.192	59.9131	64.2257	55.6077	0.925654	0.9244	0.929953	0.927983	[W (N)] and [W (T)] and [B/AA (N)] and [B/AA (T)]
miR-10a-5p__mir-10a__+1__-3__1MA17M	hsa-mir-10a	MI0000266	hsa-miR-10a-5p	MIMAT0000253	1	-3	48579907	48579925	chr17	-	1	AACCTGTAGATCCGAATTT	ACCCTGTAGATCCGAATTT	not reported	2:C-A	not reported	1	0	0	0	ACCTGTA	5p	1.66494	1.18682	2.15221	1.16624	0.353995	0.0849158	0.24167	0.0798997	[B/AA (N)]
miR-10a-5p__mir-10a__+1__-4__18M	hsa-mir-10a	MI0000266	hsa-miR-10a-5p	MIMAT0000253	1	-4	48579908	48579925	chr17	-	0	ACCCTGTAGATCCGAATT	ACCCTGTAGATCCGAATT	not reported	not reported	not reported	1	1	1	1	CCCTGTA	5p	13.2161	14.5617	14.6075	12.22	0.830527	0.819778	0.849875	0.840917	[W (N)] and [W (T)] and [B/AA (N)] and [B/AA (T)]
miR-10a-5p__mir-10a__+1__-5__17M	hsa-mir-10a	MI0000266	hsa-miR-10a-5p	MIMAT0000253	1	-5	48579909	48579925	chr17	-	0	ACCCTGTAGATCCGAAT	ACCCTGTAGATCCGAAT	not reported	not reported	not reported	1	1	1	1	CCCTGTA	5p	6.60055	7.2911	7.35275	7.37444	0.749194	0.761734	0.76478	0.762272	[W (N)] and [W (T)] and [B/AA (N)] and [B/AA (T)]
miR-10a-5p__mir-10a__+1__-6__16M	hsa-mir-10a	MI0000266	hsa-miR-10a-5p	MIMAT0000253	1	-6	48579910	48579925	chr17	-	0	ACCCTGTAGATCCGAA	ACCCTGTAGATCCGAA	not reported	not reported	not reported	1	1	1	1	CCCTGTA	5p	5.2628	9.48207	6.15502	7.98393	0.718918	0.769975	0.726084	0.798101	[W (N)] and [W (T)] and [B/AA (N)] and [B/AA (T)]
miR-10a-5p__mir-10a__+1__+1__1MA21M	hsa-mir-10a	MI0000266	hsa-miR-10a-5p	MIMAT0000253	1	1	48579903	48579925	chr17	-	1	AACCTGTAGATCCGAATTTGTGT	ACCCTGTAGATCCGAATTTGTGT	not reported	2:C-A	not reported	1	0	0	0	ACCTGTA	5p	1.94051	1.25512	2.7492	1.2012	0.491043	0.101218	0.332497	0.109101	[B/AA (N)]
miR-10a-5p__mir-10a__+1__+1__23M	hsa-mir-10a	MI0000266	hsa-miR-10a-5p	MIMAT0000253	1	1	48579903	48579925	chr17	-	0	ACCCTGTAGATCCGAATTTGTGT	ACCCTGTAGATCCGAATTTGTGT	not reported	not reported	not reported	1	1	1	1	CCCTGTA	5p	106.5	197.305	119.728	194.862	0.94966	0.96005	0.949839	0.961842	[W (N)] and [W (T)] and [B/AA (N)] and [B/AA (T)]
miR-10a-5p__mir-10a__+1__+1__2MA20M	hsa-mir-10a	MI0000266	hsa-miR-10a-5p	MIMAT0000253	1	1	48579903	48579925	chr17	-	1	ACACTGTAGATCCGAATTTGTGT	ACCCTGTAGATCCGAATTTGTGT	TCGA=3:C-A	not reported	not reported	0	1	0	1	CACTGTA	5p	1	2.05975	1	2.18629	0.000179147	0.391258	0.000179147	0.355966	[W (T)] and [B/AA (T)]
miR-10a-5p__mir-10a__+1__+2__24M	hsa-mir-10a	MI0000266	hsa-miR-10a-5p	MIMAT0000253	1	2	48579902	48579925	chr17	-	0	ACCCTGTAGATCCGAATTTGTGTA	ACCCTGTAGATCCGAATTTGTGTA	not reported	not reported	not reported	0	0	0	1	CCCTGTA	5p	1.52009	2.0317	1.41781	1.83199	0.173952	0.285919	0.189	0.349695	[W (T)]
miR-10a-5p__mir-10a__+1__0__12MT9M	hsa-mir-10a	MI0000266	hsa-miR-10a-5p	MIMAT0000253	1	0	48579904	48579925	chr17	-	1	ACCCTGTAGATCTGAATTTGTG	ACCCTGTAGATCCGAATTTGTG	rs985848773=13:C-T	not reported	not reported	1	0	1	0	CCCTGTA	5p	2.08481	1.89691	2.1032	1.86745	0.337334	0.294518	0.383733	0.302938	[W (N)] and [B/AA (N)]
miR-10a-5p__mir-10a__+1__0__1MA20M	hsa-mir-10a	MI0000266	hsa-miR-10a-5p	MIMAT0000253	1	0	48579904	48579925	chr17	-	1	AACCTGTAGATCCGAATTTGTG	ACCCTGTAGATCCGAATTTGTG	not reported	2:C-A	not reported	1	0	1	0	ACCTGTA	5p	3.28384	1.55261	5.98584	1.38117	0.712469	0.17234	0.608922	0.211752	[W (N)] and [B/AA (N)]
miR-10a-5p__mir-10a__+1__0__21MA	hsa-mir-10a	MI0000266	hsa-miR-10a-5p	MIMAT0000253	1	0	48579904	48579925	chr17	-	1	ACCCTGTAGATCCGAATTTGTA	ACCCTGTAGATCCGAATTTGTG	rs375865628=22:G-A	not reported	not reported	1	1	1	1	CCCTGTA	5p	15.9423	13.6933	18.5715	12.264	0.850949	0.820674	0.865102	0.834826	[W (N)] and [W (T)] and [B/AA (N)] and [B/AA (T)]
miR-10a-5p__mir-10a__+1__0__22M	hsa-mir-10a	MI0000266	hsa-miR-10a-5p	MIMAT0000253	1	0	48579904	48579925	chr17	-	0	ACCCTGTAGATCCGAATTTGTG	ACCCTGTAGATCCGAATTTGTG	not reported	not reported	not reported	1	1	1	1	CCCTGTA	5p	280.678	380.449	369.511	371.96	0.972411	0.974919	0.97259	0.975099	[W (N)] and [W (T)] and [B/AA (N)] and [B/AA (T)]
miR-10a-5p__mir-10a__+1__0__2MA19M	hsa-mir-10a	MI0000266	hsa-miR-10a-5p	MIMAT0000253	1	0	48579904	48579925	chr17	-	1	ACACTGTAGATCCGAATTTGTG	ACCCTGTAGATCCGAATTTGTG	TCGA=3:C-A	not reported	not reported	0	1	0	1	CACTGTA	5p	1.03196	2.76629	1	2.77381	0.000179147	0.524543	0.044966	0.52938	[W (T)] and [B/AA (T)]
miR-10a-5p__mir-10a__+1__0__3MA18M	hsa-mir-10a	MI0000266	hsa-miR-10a-5p	MIMAT0000253	1	0	48579904	48579925	chr17	-	1	ACCATGTAGATCCGAATTTGTG	ACCCTGTAGATCCGAATTTGTG	not reported	4:C-A	not reported	1	0	1	0	CCATGTA	5p	2.02014	1.18593	2.33504	1.14965	0.405052	0.0736295	0.359728	0.0788248	[W (N)] and [B/AA (N)]
miR-10a-5p__mir-10a__+2__-1__13MC6M	hsa-mir-10a	MI0000266	hsa-miR-10a-5p	MIMAT0000253	2	-1	48579905	48579924	chr17	-	1	CCCTGTAGATCCGCATTTGT	CCCTGTAGATCCGAATTTGT	not reported	14:A-C	not reported	1	0	0	0	CCTGTAG	5p	1.94289	1.13259	2.08889	1.1525	0.33196	0.0761376	0.33393	0.0496238	[B/AA (N)]
miR-10a-5p__mir-10a__+2__-1__20M	hsa-mir-10a	MI0000266	hsa-miR-10a-5p	MIMAT0000253	2	-1	48579905	48579924	chr17	-	0	CCCTGTAGATCCGAATTTGT	CCCTGTAGATCCGAATTTGT	not reported	not reported	not reported	1	1	1	1	CCTGTAG	5p	21.0636	33.0197	22.8705	23.4641	0.867789	0.874059	0.883375	0.899498	[W (N)] and [W (T)] and [B/AA (N)] and [B/AA (T)]
miR-10a-5p__mir-10a__+2__-2__19M	hsa-mir-10a	MI0000266	hsa-miR-10a-5p	MIMAT0000253	2	-2	48579906	48579924	chr17	-	0	CCCTGTAGATCCGAATTTG	CCCTGTAGATCCGAATTTG	not reported	not reported	not reported	1	1	1	1	CCTGTAG	5p	3.25693	6.40857	2.90891	4.46121	0.517915	0.66804	0.606772	0.746327	[W (N)] and [W (T)] and [B/AA (N)] and [B/AA (T)]
miR-10a-5p__mir-10a__+2__+1__22M	hsa-mir-10a	MI0000266	hsa-miR-10a-5p	MIMAT0000253	2	1	48579903	48579924	chr17	-	0	CCCTGTAGATCCGAATTTGTGT	CCCTGTAGATCCGAATTTGTGT	not reported	not reported	not reported	1	1	1	1	CCTGTAG	5p	4.23083	7.04645	4.07098	6.28766	0.627195	0.738982	0.683805	0.758868	[W (N)] and [W (T)] and [B/AA (N)] and [B/AA (T)]
miR-10a-5p__mir-10a__+2__0__21M	hsa-mir-10a	MI0000266	hsa-miR-10a-5p	MIMAT0000253	2	0	48579904	48579924	chr17	-	0	CCCTGTAGATCCGAATTTGTG	CCCTGTAGATCCGAATTTGTG	not reported	not reported	not reported	1	1	1	1	CCTGTAG	5p	5.20822	8.01495	6.90586	6.342	0.740595	0.739878	0.724472	0.774633	[W (N)] and [W (T)] and [B/AA (N)] and [B/AA (T)]
miR-10a-5p__mir-10a__+3__-1__19M	hsa-mir-10a	MI0000266	hsa-miR-10a-5p	MIMAT0000253	3	-1	48579905	48579923	chr17	-	0	CCTGTAGATCCGAATTTGT	CCTGTAGATCCGAATTTGT	not reported	not reported	not reported	0	1	0	1	CTGTAGA	5p	1.64966	2.87194	1.52194	2.43816	0.198674	0.458259	0.236116	0.545503	[W (T)] and [B/AA (T)]
miR-10a-5p__mir-10a__+4__-1__18M	hsa-mir-10a	MI0000266	hsa-miR-10a-5p	MIMAT0000253	4	-1	48579905	48579922	chr17	-	0	CTGTAGATCCGAATTTGT	CTGTAGATCCGAATTTGT	not reported	not reported	not reported	0	1	0	1	TGTAGAT	5p	1.53835	5.64289	1.51981	5.25932	0.197779	0.705482	0.195808	0.724113	[W (T)] and [B/AA (T)]
miR-10a-5p__mir-10a__+4__-2__17M	hsa-mir-10a	MI0000266	hsa-miR-10a-5p	MIMAT0000253	4	-2	48579906	48579922	chr17	-	0	CTGTAGATCCGAATTTG	CTGTAGATCCGAATTTG	not reported	not reported	not reported	0	0	0	1	TGTAGAT	5p	1.07683	2.18726	1.05545	1.92654	0.0757793	0.309387	0.063239	0.399857	[W (T)]
miR-10a-5p__mir-10a__+4__0__19M	hsa-mir-10a	MI0000266	hsa-miR-10a-5p	MIMAT0000253	4	0	48579904	48579922	chr17	-	0	CTGTAGATCCGAATTTGTG	CTGTAGATCCGAATTTGTG	not reported	not reported	not reported	0	1	0	1	TGTAGAT	5p	1.09792	2.35843	1	2.17897	0.000179147	0.386958	0.0696883	0.44751	[W (T)] and [B/AA (T)]
miR-10a-5p__mir-10a__0__-1__10MC11M	hsa-mir-10a	MI0000266	hsa-miR-10a-5p	MIMAT0000253	0	-1	48579905	48579926	chr17	-	1	TACCCTGTAGCTCCGAATTTGT	TACCCTGTAGATCCGAATTTGT	not reported	11:A-C	not reported	0	1	1	1	ACCCTGT	5p	2.6942	13.8563	1.92441	14.5598	0.278753	0.838767	0.533321	0.835364	[W (N)] and [W (T)] and [B/AA (T)]
miR-10a-5p__mir-10a__0__-1__12MA9M	hsa-mir-10a	MI0000266	hsa-miR-10a-5p	MIMAT0000253	0	-1	48579905	48579926	chr17	-	1	TACCCTGTAGATACGAATTTGT	TACCCTGTAGATCCGAATTTGT	not reported	13:C-A	not reported	1	1	1	1	ACCCTGT	5p	2.81169	2.9642	3.38475	3.0279	0.575779	0.559656	0.549265	0.556969	[W (N)] and [W (T)] and [B/AA (N)] and [B/AA (T)]
miR-10a-5p__mir-10a__0__-1__12MG9M	hsa-mir-10a	MI0000266	hsa-miR-10a-5p	MIMAT0000253	0	-1	48579905	48579926	chr17	-	1	TACCCTGTAGATGCGAATTTGT	TACCCTGTAGATCCGAATTTGT	not reported	13:C-G	not reported	1	0	0	0	ACCCTGT	5p	1.9264	1.46484	2.14169	1.29344	0.349875	0.14081	0.327481	0.183447	[B/AA (N)]
miR-10a-5p__mir-10a__0__-1__12MT9M	hsa-mir-10a	MI0000266	hsa-miR-10a-5p	MIMAT0000253	0	-1	48579905	48579926	chr17	-	1	TACCCTGTAGATTCGAATTTGT	TACCCTGTAGATCCGAATTTGT	COSV100203706,TCGA,rs369632753=13:C-T	not reported	not reported	1	1	1	1	ACCCTGT	5p	7.9755	5.88014	10.267	4.92246	0.794518	0.686313	0.791831	0.731458	[W (N)] and [W (T)] and [B/AA (N)] and [B/AA (T)]
miR-10a-5p__mir-10a__0__-1__13MA8M	hsa-mir-10a	MI0000266	hsa-miR-10a-5p	MIMAT0000253	0	-1	48579905	48579926	chr17	-	1	TACCCTGTAGATCAGAATTTGT	TACCCTGTAGATCCGAATTTGT	rs985848773=14:C-A	not reported	not reported	1	1	1	1	ACCCTGT	5p	4.46183	3.56872	6.16209	3.09187	0.719276	0.567539	0.695271	0.618595	[W (N)] and [W (T)] and [B/AA (N)] and [B/AA (T)]
miR-10a-5p__mir-10a__0__-1__13MT8M	hsa-mir-10a	MI0000266	hsa-miR-10a-5p	MIMAT0000253	0	-1	48579905	48579926	chr17	-	1	TACCCTGTAGATCTGAATTTGT	TACCCTGTAGATCCGAATTTGT	rs985848773=14:C-T	not reported	not reported	1	1	1	1	ACCCTGT	5p	6.27847	5.45507	7.35582	4.66473	0.749373	0.674489	0.757972	0.718022	[W (N)] and [W (T)] and [B/AA (N)] and [B/AA (T)]
miR-10a-5p__mir-10a__0__-1__14MA7M	hsa-mir-10a	MI0000266	hsa-miR-10a-5p	MIMAT0000253	0	-1	48579905	48579926	chr17	-	1	TACCCTGTAGATCCAAATTTGT	TACCCTGTAGATCCGAATTTGT	TCGA=15:G-A	not reported	not reported	1	1	0	1	ACCCTGT	5p	1.94644	2.57321	2.39025	2.13945	0.417234	0.372805	0.335543	0.497492	[W (T)] and [B/AA (N)] and [B/AA (T)]
miR-10a-5p__mir-10a__0__-1__14MT7M	hsa-mir-10a	MI0000266	hsa-miR-10a-5p	MIMAT0000253	0	-1	48579905	48579926	chr17	-	1	TACCCTGTAGATCCTAATTTGT	TACCCTGTAGATCCGAATTTGT	TCGA=15:G-T	not reported	not reported	1	0	1	0	ACCCTGT	5p	2.34552	1.94853	2.84899	1.78144	0.508241	0.274274	0.462021	0.318345	[W (N)] and [B/AA (N)]
miR-10a-5p__mir-10a__0__-1__15MC6M	hsa-mir-10a	MI0000266	hsa-miR-10a-5p	MIMAT0000253	0	-1	48579905	48579926	chr17	-	1	TACCCTGTAGATCCGCATTTGT	TACCCTGTAGATCCGAATTTGT	not reported	16:A-C	not reported	1	0	1	0	ACCCTGT	5p	3.3341	1.6323	3.12806	1.28375	0.545145	0.136331	0.615371	0.235041	[W (N)] and [B/AA (N)]
miR-10a-5p__mir-10a__0__-1__15MG6M	hsa-mir-10a	MI0000266	hsa-miR-10a-5p	MIMAT0000253	0	-1	48579905	48579926	chr17	-	1	TACCCTGTAGATCCGGATTTGT	TACCCTGTAGATCCGAATTTGT	not reported	16:A-G	not reported	1	1	1	1	ACCCTGT	5p	4.31787	3.68788	4.82909	3.49086	0.670548	0.606593	0.688105	0.629703	[W (N)] and [W (T)] and [B/AA (N)] and [B/AA (T)]
miR-10a-5p__mir-10a__0__-1__16MC5M	hsa-mir-10a	MI0000266	hsa-miR-10a-5p	MIMAT0000253	0	-1	48579905	48579926	chr17	-	1	TACCCTGTAGATCCGACTTTGT	TACCCTGTAGATCCGAATTTGT	not reported	17:A-C	not reported	0	1	0	1	ACCCTGT	5p	1.33927	2.98229	1.42487	3.24416	0.176281	0.583483	0.139735	0.559298	[W (T)] and [B/AA (T)]
miR-10a-5p__mir-10a__0__-1__16MG5M	hsa-mir-10a	MI0000266	hsa-miR-10a-5p	MIMAT0000253	0	-1	48579905	48579926	chr17	-	1	TACCCTGTAGATCCGAGTTTGT	TACCCTGTAGATCCGAATTTGT	not reported	17:A-G	not reported	0	0	0	1	ACCCTGT	5p	1.69129	2.02448	1.73241	1.79799	0.240953	0.278216	0.248477	0.346113	[W (T)]
miR-10a-5p__mir-10a__0__-1__17MA4M	hsa-mir-10a	MI0000266	hsa-miR-10a-5p	MIMAT0000253	0	-1	48579905	48579926	chr17	-	1	TACCCTGTAGATCCGAAATTGT	TACCCTGTAGATCCGAATTTGT	not reported	18:T-A	not reported	1	1	1	1	ACCCTGT	5p	8.6831	8.0911	11.5693	7.22075	0.806342	0.757972	0.804013	0.775887	[W (N)] and [W (T)] and [B/AA (N)] and [B/AA (T)]
miR-10a-5p__mir-10a__0__-1__17MC4M	hsa-mir-10a	MI0000266	hsa-miR-10a-5p	MIMAT0000253	0	-1	48579905	48579926	chr17	-	1	TACCCTGTAGATCCGAACTTGT	TACCCTGTAGATCCGAATTTGT	rs772649724=18:T-C	not reported	not reported	1	1	1	1	ACCCTGT	5p	2.03829	2.29969	2.39039	2.16845	0.417413	0.381763	0.366177	0.430133	[W (N)] and [W (T)] and [B/AA (N)] and [B/AA (T)]
miR-10a-5p__mir-10a__0__-1__19MC2M	hsa-mir-10a	MI0000266	hsa-miR-10a-5p	MIMAT0000253	0	-1	48579905	48579926	chr17	-	1	TACCCTGTAGATCCGAATTCGT	TACCCTGTAGATCCGAATTTGT	not reported	20:T-C	not reported	1	1	0	1	ACCCTGT	5p	1.90384	2.24265	2.10843	2.18426	0.339305	0.389645	0.318166	0.416159	[W (T)] and [B/AA (N)] and [B/AA (T)]
miR-10a-5p__mir-10a__0__-1__1MC1MA18M	hsa-mir-10a	MI0000266	hsa-miR-10a-5p	MIMAT0000253	0	-1	48579905	48579926	chr17	-	2	TCCACTGTAGATCCGAATTTGT	TACCCTGTAGATCCGAATTTGT	TCGA=4:C-A	2:A-C	not reported	1	0	1	0	CCACTGT	5p	5.97648	1.65827	10.4185	1.5145	0.795772	0.209961	0.750269	0.240774	[W (N)] and [B/AA (N)]
miR-10a-5p__mir-10a__0__-1__1MC20M	hsa-mir-10a	MI0000266	hsa-miR-10a-5p	MIMAT0000253	0	-1	48579905	48579926	chr17	-	1	TCCCCTGTAGATCCGAATTTGT	TACCCTGTAGATCCGAATTTGT	not reported	2:A-C	not reported	1	1	1	1	CCCCTGT	5p	15.972	2.61786	30.8977	2.14474	0.888929	0.374239	0.86564	0.503225	[W (N)] and [W (T)] and [B/AA (N)] and [B/AA (T)]
miR-10a-5p__mir-10a__0__-1__1MCT19M	hsa-mir-10a	MI0000266	hsa-miR-10a-5p	MIMAT0000253	0	-1	48579905	48579926	chr17	-	2	TCTCCTGTAGATCCGAATTTGT	TACCCTGTAGATCCGAATTTGT	rs770328167=3:C-T	2:A-C	not reported	1	0	0	0	CTCCTGT	5p	1.95043	1.15296	2.64309	1.09998	0.474561	0.0478323	0.336259	0.0609101	[B/AA (N)]
miR-10a-5p__mir-10a__0__-1__1MG1MG18M	hsa-mir-10a	MI0000266	hsa-miR-10a-5p	MIMAT0000253	0	-1	48579905	48579926	chr17	-	2	TGCGCTGTAGATCCGAATTTGT	TACCCTGTAGATCCGAATTTGT	rs1333990950=2:A-G	4:C-G	not reported	1	0	1	0	GCGCTGT	5p	2.27163	1.21097	3.32586	1.1375	0.568613	0.0671802	0.445539	0.0908277	[W (N)] and [B/AA (N)]
miR-10a-5p__mir-10a__0__-1__1MG20M	hsa-mir-10a	MI0000266	hsa-miR-10a-5p	MIMAT0000253	0	-1	48579905	48579926	chr17	-	1	TGCCCTGTAGATCCGAATTTGT	TACCCTGTAGATCCGAATTTGT	rs1333990950=2:A-G	not reported	not reported	1	1	1	1	GCCCTGT	5p	7.40793	5.41492	7.7199	4.82112	0.755464	0.682014	0.781799	0.716589	[W (N)] and [W (T)] and [B/AA (N)] and [B/AA (T)]
miR-10a-5p__mir-10a__0__-1__1MT1MT18M	hsa-mir-10a	MI0000266	hsa-miR-10a-5p	MIMAT0000253	0	-1	48579905	48579926	chr17	-	2	TTCTCTGTAGATCCGAATTTGT	TACCCTGTAGATCCGAATTTGT	not reported	2:A-T;4:C-T	not reported	0	1	0	0	TCTCTGT	5p	1.30052	1.80233	1.5248	2.56412	0.200287	0.486743	0.126478	0.277141	[B/AA (T)]
miR-10a-5p__mir-10a__0__-1__1MT20M	hsa-mir-10a	MI0000266	hsa-miR-10a-5p	MIMAT0000253	0	-1	48579905	48579926	chr17	-	1	TTCCCTGTAGATCCGAATTTGT	TACCCTGTAGATCCGAATTTGT	not reported	2:A-T	not reported	0	1	0	1	TCCCTGT	5p	1.33512	3.05944	1.34991	3.19822	0.156933	0.578287	0.138839	0.568434	[W (T)] and [B/AA (T)]
miR-10a-5p__mir-10a__0__-1__21MA	hsa-mir-10a	MI0000266	hsa-miR-10a-5p	MIMAT0000253	0	-1	48579905	48579926	chr17	-	1	TACCCTGTAGATCCGAATTTGA	TACCCTGTAGATCCGAATTTGT	rs529115879=22:T-A	not reported	not reported	1	1	1	1	ACCCTGT	5p	111.792	99.0205	139.283	87.2879	0.953422	0.938911	0.951451	0.943569	[W (N)] and [W (T)] and [B/AA (N)] and [B/AA (T)]
miR-10a-5p__mir-10a__0__-1__22M	hsa-mir-10a	MI0000266	hsa-miR-10a-5p	MIMAT0000253	0	-1	48579905	48579926	chr17	-	0	TACCCTGTAGATCCGAATTTGT	TACCCTGTAGATCCGAATTTGT	not reported	not reported	not reported	1	1	1	1	ACCCTGT	5p	10242.5	13185.9	12767.3	11983.9	0.998209	0.998388	0.998209	0.998746	[W (N)] and [W (T)] and [B/AA (N)] and [B/AA (T)]
miR-10a-5p__mir-10a__0__-1__2MA19M	hsa-mir-10a	MI0000266	hsa-miR-10a-5p	MIMAT0000253	0	-1	48579905	48579926	chr17	-	1	TAACCTGTAGATCCGAATTTGT	TACCCTGTAGATCCGAATTTGT	not reported	3:C-A	not reported	1	1	1	1	AACCTGT	5p	2.22667	27.5443	2.5143	26.5535	0.448406	0.883913	0.43479	0.889824	[W (N)] and [W (T)] and [B/AA (N)] and [B/AA (T)]
miR-10a-5p__mir-10a__0__-1__2MAG18M	hsa-mir-10a	MI0000266	hsa-miR-10a-5p	MIMAT0000253	0	-1	48579905	48579926	chr17	-	2	TAAGCTGTAGATCCGAATTTGT	TACCCTGTAGATCCGAATTTGT	not reported	3:C-A;4:C-G	not reported	0	1	0	1	AAGCTGT	5p	1	2.83152	1	4.20778	0.000179147	0.655679	0.000179147	0.53995	[W (T)] and [B/AA (T)]
miR-10a-5p__mir-10a__0__-1__2MAT18M	hsa-mir-10a	MI0000266	hsa-miR-10a-5p	MIMAT0000253	0	-1	48579905	48579926	chr17	-	2	TAATCTGTAGATCCGAATTTGT	TACCCTGTAGATCCGAATTTGT	not reported	3:C-A;4:C-T	not reported	0	0	0	1	AATCTGT	5p	1	2.0494	1	1.95968	0.000179147	0.316912	0.000179147	0.353458	[W (T)]
miR-10a-5p__mir-10a__0__-1__2MG19M	hsa-mir-10a	MI0000266	hsa-miR-10a-5p	MIMAT0000253	0	-1	48579905	48579926	chr17	-	1	TAGCCTGTAGATCCGAATTTGT	TACCCTGTAGATCCGAATTTGT	not reported	3:C-G	not reported	1	1	1	1	AGCCTGT	5p	8.21452	4.17993	19.684	3.76962	0.855607	0.625941	0.796668	0.658545	[W (N)] and [W (T)] and [B/AA (N)] and [B/AA (T)]
miR-10a-5p__mir-10a__0__-1__2MT19M	hsa-mir-10a	MI0000266	hsa-miR-10a-5p	MIMAT0000253	0	-1	48579905	48579926	chr17	-	1	TATCCTGTAGATCCGAATTTGT	TACCCTGTAGATCCGAATTTGT	rs770328167=3:C-T	not reported	not reported	1	1	1	1	ATCCTGT	5p	2.63519	3.7234	2.83616	2.92064	0.505374	0.545324	0.52311	0.632032	[W (N)] and [W (T)] and [B/AA (N)] and [B/AA (T)]
miR-10a-5p__mir-10a__0__-1__3MA18M	hsa-mir-10a	MI0000266	hsa-miR-10a-5p	MIMAT0000253	0	-1	48579905	48579926	chr17	-	1	TACACTGTAGATCCGAATTTGT	TACCCTGTAGATCCGAATTTGT	TCGA=4:C-A	not reported	not reported	1	1	1	1	ACACTGT	5p	32.6886	3.70408	66.5529	3.42466	0.926729	0.600502	0.909172	0.630957	[W (N)] and [W (T)] and [B/AA (N)] and [B/AA (T)]
miR-10a-5p__mir-10a__0__-1__3MG18M	hsa-mir-10a	MI0000266	hsa-miR-10a-5p	MIMAT0000253	0	-1	48579905	48579926	chr17	-	1	TACGCTGTAGATCCGAATTTGT	TACCCTGTAGATCCGAATTTGT	not reported	4:C-G	not reported	1	1	1	1	ACGCTGT	5p	2.10099	6.4056	2.24224	6.18646	0.381763	0.736474	0.391437	0.746148	[W (N)] and [W (T)] and [B/AA (N)] and [B/AA (T)]
miR-10a-5p__mir-10a__0__-1__3MT18M	hsa-mir-10a	MI0000266	hsa-miR-10a-5p	MIMAT0000253	0	-1	48579905	48579926	chr17	-	1	TACTCTGTAGATCCGAATTTGT	TACCCTGTAGATCCGAATTTGT	not reported	4:C-T	not reported	1	1	1	1	ACTCTGT	5p	3.19828	11.1352	3.47655	13.3282	0.585274	0.82981	0.600322	0.816374	[W (N)] and [W (T)] and [B/AA (N)] and [B/AA (T)]
miR-10a-5p__mir-10a__0__-1__4MA17M	hsa-mir-10a	MI0000266	hsa-miR-10a-5p	MIMAT0000253	0	-1	48579905	48579926	chr17	-	1	TACCATGTAGATCCGAATTTGT	TACCCTGTAGATCCGAATTTGT	not reported	5:C-A	not reported	1	1	0	1	ACCATGT	5p	1.95112	2.19567	2.16564	3.91384	0.358653	0.636689	0.336439	0.402006	[W (T)] and [B/AA (N)] and [B/AA (T)]
miR-10a-5p__mir-10a__0__-1__4MG17M	hsa-mir-10a	MI0000266	hsa-miR-10a-5p	MIMAT0000253	0	-1	48579905	48579926	chr17	-	1	TACCGTGTAGATCCGAATTTGT	TACCCTGTAGATCCGAATTTGT	TCGA=5:C-G	not reported	not reported	0	1	0	0	ACCGTGT	5p	1.77827	1.71701	1.71849	2.37754	0.237908	0.446614	0.276245	0.256897	[B/AA (T)]
miR-10a-5p__mir-10a__0__-1__5MC16M	hsa-mir-10a	MI0000266	hsa-miR-10a-5p	MIMAT0000253	0	-1	48579905	48579926	chr17	-	1	TACCCCGTAGATCCGAATTTGT	TACCCTGTAGATCCGAATTTGT	not reported	6:T-C	not reported	1	1	1	1	ACCCCGT	5p	2.59243	3.08877	3.39427	2.96726	0.576317	0.551774	0.514869	0.571659	[W (N)] and [W (T)] and [B/AA (N)] and [B/AA (T)]
miR-10a-5p__mir-10a__0__-1__5MG16M	hsa-mir-10a	MI0000266	hsa-miR-10a-5p	MIMAT0000253	0	-1	48579905	48579926	chr17	-	1	TACCCGGTAGATCCGAATTTGT	TACCCTGTAGATCCGAATTTGT	not reported	6:T-G	not reported	1	0	0	0	ACCCGGT	5p	1.98212	1.87531	2.51813	1.91038	0.449839	0.305446	0.347187	0.295414	[B/AA (N)]
miR-10a-5p__mir-10a__0__-1__6MA15M	hsa-mir-10a	MI0000266	hsa-miR-10a-5p	MIMAT0000253	0	-1	48579905	48579926	chr17	-	1	TACCCTATAGATCCGAATTTGT	TACCCTGTAGATCCGAATTTGT	rs1391955925=7:G-A	not reported	not reported	1	0	1	1	ACCCTAT	5p	2.34087	2.14697	2.55064	1.85283	0.456467	0.290935	0.461125	0.387137	[W (N)] and [W (T)] and [B/AA (N)]
miR-10a-5p__mir-10a__0__-1__6MT15M	hsa-mir-10a	MI0000266	hsa-miR-10a-5p	MIMAT0000253	0	-1	48579905	48579926	chr17	-	1	TACCCTTTAGATCCGAATTTGT	TACCCTGTAGATCCGAATTTGT	not reported	7:G-T	not reported	1	1	1	1	ACCCTTT	5p	2.56565	2.20437	2.70079	2.87681	0.482444	0.537979	0.51057	0.404515	[W (N)] and [W (T)] and [B/AA (N)] and [B/AA (T)]
miR-10a-5p__mir-10a__0__-1__7MC14M	hsa-mir-10a	MI0000266	hsa-miR-10a-5p	MIMAT0000253	0	-1	48579905	48579926	chr17	-	1	TACCCTGCAGATCCGAATTTGT	TACCCTGTAGATCCGAATTTGT	not reported	8:T-C	not reported	1	1	0	1	ACCCTGC	5p	1.77731	2.31516	2.35506	2.18687	0.408993	0.391616	0.276066	0.432999	[W (T)] and [B/AA (N)] and [B/AA (T)]
miR-10a-5p__mir-10a__0__-1__8MG13M	hsa-mir-10a	MI0000266	hsa-miR-10a-5p	MIMAT0000253	0	-1	48579905	48579926	chr17	-	1	TACCCTGTGGATCCGAATTTGT	TACCCTGTAGATCCGAATTTGT	not reported	9:A-G	not reported	1	1	1	1	ACCCTGT	5p	2.14483	2.20414	2.58954	2.05941	0.463275	0.344858	0.409531	0.404156	[W (N)] and [W (T)] and [B/AA (N)] and [B/AA (T)]
miR-10a-5p__mir-10a__0__-1__8MT13M	hsa-mir-10a	MI0000266	hsa-miR-10a-5p	MIMAT0000253	0	-1	48579905	48579926	chr17	-	1	TACCCTGTTGATCCGAATTTGT	TACCCTGTAGATCCGAATTTGT	not reported	9:A-T	not reported	1	0	0	0	ACCCTGT	5p	1.73779	1.5304	2.05982	1.38985	0.320315	0.175564	0.262809	0.204765	[B/AA (N)]
miR-10a-5p__mir-10a__0__-1__9MT12M	hsa-mir-10a	MI0000266	hsa-miR-10a-5p	MIMAT0000253	0	-1	48579905	48579926	chr17	-	1	TACCCTGTATATCCGAATTTGT	TACCCTGTAGATCCGAATTTGT	rs760091682=10:G-T	not reported	not reported	1	0	1	0	ACCCTGT	5p	2.43331	1.74318	2.61923	1.55277	0.470262	0.218022	0.48531	0.261913	[W (N)] and [B/AA (N)]
miR-10a-5p__mir-10a__0__-1__C21M	hsa-mir-10a	MI0000266	hsa-miR-10a-5p	MIMAT0000253	0	-1	48579905	48579926	chr17	-	1	CACCCTGTAGATCCGAATTTGT	TACCCTGTAGATCCGAATTTGT	TCGA=1:T-C	not reported	not reported	1	1	0	1	ACCCTGT	5p	1.80826	3.17323	2.21354	2.5022	0.372985	0.473307	0.285561	0.581333	[W (T)] and [B/AA (N)] and [B/AA (T)]
miR-10a-5p__mir-10a__0__-2__10MC10M	hsa-mir-10a	MI0000266	hsa-miR-10a-5p	MIMAT0000253	0	-2	48579906	48579926	chr17	-	1	TACCCTGTAGCTCCGAATTTG	TACCCTGTAGATCCGAATTTG	not reported	11:A-C	not reported	0	1	0	1	ACCCTGT	5p	1.34432	3.92676	1.22189	3.68357	0.12612	0.620924	0.141526	0.644751	[W (T)] and [B/AA (T)]
miR-10a-5p__mir-10a__0__-2__12MT8M	hsa-mir-10a	MI0000266	hsa-miR-10a-5p	MIMAT0000253	0	-2	48579906	48579926	chr17	-	1	TACCCTGTAGATTCGAATTTG	TACCCTGTAGATCCGAATTTG	COSV100203706,TCGA,rs369632753=13:C-T	not reported	not reported	1	0	1	0	ACCCTGT	5p	2.16085	1.68536	2.55268	1.58063	0.456826	0.225009	0.41383	0.24794	[W (N)] and [B/AA (N)]
miR-10a-5p__mir-10a__0__-2__13MA7M	hsa-mir-10a	MI0000266	hsa-miR-10a-5p	MIMAT0000253	0	-2	48579906	48579926	chr17	-	1	TACCCTGTAGATCAGAATTTG	TACCCTGTAGATCCGAATTTG	rs985848773=14:C-A	not reported	not reported	1	0	0	0	ACCCTGT	5p	1.99487	1.55961	2.17612	1.44535	0.362057	0.194733	0.350591	0.213902	[B/AA (N)]
miR-10a-5p__mir-10a__0__-2__13MT7M	hsa-mir-10a	MI0000266	hsa-miR-10a-5p	MIMAT0000253	0	-2	48579906	48579926	chr17	-	1	TACCCTGTAGATCTGAATTTG	TACCCTGTAGATCCGAATTTG	rs985848773=14:C-T	not reported	not reported	1	1	1	1	ACCCTGT	5p	5.83265	3.27411	5.49737	3.03022	0.696525	0.559835	0.746148	0.591903	[W (N)] and [W (T)] and [B/AA (N)] and [B/AA (T)]
miR-10a-5p__mir-10a__0__-2__17MA3M	hsa-mir-10a	MI0000266	hsa-miR-10a-5p	MIMAT0000253	0	-2	48579906	48579926	chr17	-	1	TACCCTGTAGATCCGAAATTG	TACCCTGTAGATCCGAATTTG	not reported	18:T-A	not reported	1	0	1	0	ACCCTGT	5p	2.38523	1.94449	2.44148	1.80855	0.429595	0.281261	0.471516	0.317091	[W (N)] and [B/AA (N)]
miR-10a-5p__mir-10a__0__-2__1MC19M	hsa-mir-10a	MI0000266	hsa-miR-10a-5p	MIMAT0000253	0	-2	48579906	48579926	chr17	-	1	TCCCCTGTAGATCCGAATTTG	TACCCTGTAGATCCGAATTTG	not reported	2:A-C	not reported	1	0	1	0	CCCCTGT	5p	4.69712	1.57802	5.96679	1.47771	0.711931	0.202078	0.705661	0.219635	[W (N)] and [B/AA (N)]
miR-10a-5p__mir-10a__0__-2__1MC1MA17M	hsa-mir-10a	MI0000266	hsa-miR-10a-5p	MIMAT0000253	0	-2	48579906	48579926	chr17	-	2	TCCACTGTAGATCCGAATTTG	TACCCTGTAGATCCGAATTTG	TCGA=4:C-A	2:A-C	not reported	1	0	1	0	CCACTGT	5p	2.28412	1.29105	2.78713	1.26597	0.499104	0.130419	0.448226	0.123432	[W (N)] and [B/AA (N)]
miR-10a-5p__mir-10a__0__-2__1MG19M	hsa-mir-10a	MI0000266	hsa-miR-10a-5p	MIMAT0000253	0	-2	48579906	48579926	chr17	-	1	TGCCCTGTAGATCCGAATTTG	TACCCTGTAGATCCGAATTTG	rs1333990950=2:A-G	not reported	not reported	1	0	0	0	GCCCTGT	5p	1.97528	1.63531	2.00619	1.52448	0.295772	0.212648	0.344679	0.235579	[B/AA (N)]
miR-10a-5p__mir-10a__0__-2__21M	hsa-mir-10a	MI0000266	hsa-miR-10a-5p	MIMAT0000253	0	-2	48579906	48579926	chr17	-	0	TACCCTGTAGATCCGAATTTG	TACCCTGTAGATCCGAATTTG	not reported	not reported	not reported	1	1	1	1	ACCCTGT	5p	1425.36	1723.88	1828.8	1550.17	0.991401	0.990326	0.991043	0.99158	[W (N)] and [W (T)] and [B/AA (N)] and [B/AA (T)]
miR-10a-5p__mir-10a__0__-2__2MA18M	hsa-mir-10a	MI0000266	hsa-miR-10a-5p	MIMAT0000253	0	-2	48579906	48579926	chr17	-	1	TAACCTGTAGATCCGAATTTG	TACCCTGTAGATCCGAATTTG	not reported	3:C-A	not reported	0	1	0	1	AACCTGT	5p	1.20833	7.30096	1.10098	6.56718	0.0893945	0.74579	0.101218	0.762809	[W (T)] and [B/AA (T)]
miR-10a-5p__mir-10a__0__-2__2MG18M	hsa-mir-10a	MI0000266	hsa-miR-10a-5p	MIMAT0000253	0	-2	48579906	48579926	chr17	-	1	TAGCCTGTAGATCCGAATTTG	TACCCTGTAGATCCGAATTTG	not reported	3:C-G	not reported	1	1	1	1	AGCCTGT	5p	4.66363	2.47344	8.34154	2.2548	0.765855	0.410247	0.704049	0.477607	[W (N)] and [W (T)] and [B/AA (N)] and [B/AA (T)]
miR-10a-5p__mir-10a__0__-2__3MA17M	hsa-mir-10a	MI0000266	hsa-miR-10a-5p	MIMAT0000253	0	-2	48579906	48579926	chr17	-	1	TACACTGTAGATCCGAATTTG	TACCCTGTAGATCCGAATTTG	TCGA=4:C-A	not reported	not reported	1	0	1	0	ACACTGT	5p	9.88783	1.78085	16.6966	1.66989	0.842888	0.24579	0.820136	0.272662	[W (N)] and [B/AA (N)]
miR-10a-5p__mir-10a__0__-2__3MG17M	hsa-mir-10a	MI0000266	hsa-miR-10a-5p	MIMAT0000253	0	-2	48579906	48579926	chr17	-	1	TACGCTGTAGATCCGAATTTG	TACCCTGTAGATCCGAATTTG	not reported	4:C-G	not reported	0	0	0	1	ACGCTGT	5p	1.189	2.10467	1.1875	1.92505	0.117521	0.30885	0.0963812	0.371731	[W (T)]
miR-10a-5p__mir-10a__0__-2__3MT17M	hsa-mir-10a	MI0000266	hsa-miR-10a-5p	MIMAT0000253	0	-2	48579906	48579926	chr17	-	1	TACTCTGTAGATCCGAATTTG	TACCCTGTAGATCCGAATTTG	not reported	4:C-T	not reported	0	1	0	1	ACTCTGT	5p	1.52712	3.02505	1.48534	3.21232	0.189717	0.580258	0.192762	0.563956	[W (T)] and [B/AA (T)]
miR-10a-5p__mir-10a__0__-3__15MC4M	hsa-mir-10a	MI0000266	hsa-miR-10a-5p	MIMAT0000253	0	-3	48579907	48579926	chr17	-	1	TACCCTGTAGATCCGCATTT	TACCCTGTAGATCCGAATTT	not reported	16:A-C	not reported	1	0	1	0	ACCCTGT	5p	2.72646	1.09557	2.89699	1.09687	0.515944	0.0465783	0.538517	0.0286636	[W (N)] and [B/AA (N)]
miR-10a-5p__mir-10a__0__-3__1MC18M	hsa-mir-10a	MI0000266	hsa-miR-10a-5p	MIMAT0000253	0	-3	48579907	48579926	chr17	-	1	TCCCCTGTAGATCCGAATTT	TACCCTGTAGATCCGAATTT	not reported	2:A-C	not reported	1	0	1	0	CCCCTGT	5p	2.72854	1.23557	3.59216	1.18587	0.596381	0.0940523	0.539233	0.101218	[W (N)] and [B/AA (N)]
miR-10a-5p__mir-10a__0__-3__20M	hsa-mir-10a	MI0000266	hsa-miR-10a-5p	MIMAT0000253	0	-3	48579907	48579926	chr17	-	0	TACCCTGTAGATCCGAATTT	TACCCTGTAGATCCGAATTT	not reported	not reported	not reported	1	1	1	1	ACCCTGT	5p	275.15	199.211	253.499	161.024	0.965783	0.955392	0.972411	0.962021	[W (N)] and [W (T)] and [B/AA (N)] and [B/AA (T)]
miR-10a-5p__mir-10a__0__-3__2MA17M	hsa-mir-10a	MI0000266	hsa-miR-10a-5p	MIMAT0000253	0	-3	48579907	48579926	chr17	-	1	TAACCTGTAGATCCGAATTT	TACCCTGTAGATCCGAATTT	not reported	3:C-A	not reported	0	0	0	1	AACCTGT	5p	1.04729	2.31042	1.08247	1.87641	0.0854532	0.296668	0.052311	0.432103	[W (T)]
miR-10a-5p__mir-10a__0__-3__2MG17M	hsa-mir-10a	MI0000266	hsa-miR-10a-5p	MIMAT0000253	0	-3	48579907	48579926	chr17	-	1	TAGCCTGTAGATCCGAATTT	TACCCTGTAGATCCGAATTT	not reported	3:C-G	not reported	1	0	0	0	AGCCTGT	5p	1.7105	1.18217	2.09868	1.141	0.335543	0.0695091	0.253493	0.0764959	[B/AA (N)]
miR-10a-5p__mir-10a__0__-3__3MA16M	hsa-mir-10a	MI0000266	hsa-miR-10a-5p	MIMAT0000253	0	-3	48579907	48579926	chr17	-	1	TACACTGTAGATCCGAATTT	TACCCTGTAGATCCGAATTT	TCGA=4:C-A	not reported	not reported	1	0	1	0	ACACTGT	5p	4.20061	1.29596	5.77226	1.28711	0.705482	0.137406	0.682372	0.12612	[W (N)] and [B/AA (N)]
miR-10a-5p__mir-10a__0__-4__19M	hsa-mir-10a	MI0000266	hsa-miR-10a-5p	MIMAT0000253	0	-4	48579908	48579926	chr17	-	0	TACCCTGTAGATCCGAATT	TACCCTGTAGATCCGAATT	not reported	not reported	not reported	1	1	1	1	ACCCTGT	5p	51.8734	56.5265	56.6035	40.594	0.919384	0.907739	0.927625	0.925296	[W (N)] and [W (T)] and [B/AA (N)] and [B/AA (T)]
miR-10a-5p__mir-10a__0__-5__18M	hsa-mir-10a	MI0000266	hsa-miR-10a-5p	MIMAT0000253	0	-5	48579909	48579926	chr17	-	0	TACCCTGTAGATCCGAAT	TACCCTGTAGATCCGAAT	not reported	not reported	not reported	1	1	1	1	ACCCTGT	5p	20.9969	21.7622	23.3765	19.0066	0.869939	0.858474	0.883196	0.871731	[W (N)] and [W (T)] and [B/AA (N)] and [B/AA (T)]
miR-10a-5p__mir-10a__0__-6__17M	hsa-mir-10a	MI0000266	hsa-miR-10a-5p	MIMAT0000253	0	-6	48579910	48579926	chr17	-	0	TACCCTGTAGATCCGAA	TACCCTGTAGATCCGAA	not reported	not reported	not reported	1	1	1	1	ACCCTGT	5p	14.6313	18.4137	22.8273	20.0919	0.86761	0.862236	0.856682	0.858474	[W (N)] and [W (T)] and [B/AA (N)] and [B/AA (T)]
miR-10a-5p__mir-10a__0__-7__16M	hsa-mir-10a	MI0000266	hsa-miR-10a-5p	MIMAT0000253	0	-7	48579911	48579926	chr17	-	0	TACCCTGTAGATCCGA	TACCCTGTAGATCCGA	not reported	not reported	not reported	1	1	1	1	ACCCTGT	5p	56.2276	63.9948	80.7067	41.0586	0.934611	0.909172	0.931207	0.931387	[W (N)] and [W (T)] and [B/AA (N)] and [B/AA (T)]
miR-10a-5p__mir-10a__0__-7__3MA12M	hsa-mir-10a	MI0000266	hsa-miR-10a-5p	MIMAT0000253	0	-7	48579911	48579926	chr17	-	1	TACACTGTAGATCCGA	TACCCTGTAGATCCGA	TCGA=4:C-A	not reported	not reported	1	0	0	0	ACACTGT	5p	1.71949	1.0905	2.02242	1.0963	0.302759	0.0460408	0.256181	0.0256181	[B/AA (N)]
miR-10a-5p__mir-10a__0__+1__22MA1M	hsa-mir-10a	MI0000266	hsa-miR-10a-5p	MIMAT0000253	0	1	48579903	48579926	chr17	-	1	TACCCTGTAGATCCGAATTTGTAT	TACCCTGTAGATCCGAATTTGTGT	rs375865628=23:G-A	not reported	not reported	1	1	1	1	ACCCTGT	5p	3.99531	11.075	5.71859	13.8849	0.703332	0.834289	0.66804	0.816195	[W (N)] and [W (T)] and [B/AA (N)] and [B/AA (T)]
miR-10a-5p__mir-10a__0__+1__24M	hsa-mir-10a	MI0000266	hsa-miR-10a-5p	MIMAT0000253	0	1	48579903	48579926	chr17	-	0	TACCCTGTAGATCCGAATTTGTGT	TACCCTGTAGATCCGAATTTGTGT	not reported	not reported	not reported	1	1	1	1	ACCCTGT	5p	51.9564	88.0335	59.777	82.6444	0.921892	0.937298	0.927983	0.940344	[W (N)] and [W (T)] and [B/AA (N)] and [B/AA (T)]
miR-10a-5p__mir-10a__0__0__21MAA	hsa-mir-10a	MI0000266	hsa-miR-10a-5p	MIMAT0000253	0	0	48579904	48579926	chr17	-	2	TACCCTGTAGATCCGAATTTGAA	TACCCTGTAGATCCGAATTTGTG	rs529115879=22:T-A;rs375865628=23:G-A	not reported	not reported	1	1	1	1	ACCCTGT	5p	2.99303	2.54835	3.43933	2.49079	0.581333	0.469366	0.575421	0.493192	[W (N)] and [W (T)] and [B/AA (N)] and [B/AA (T)]
miR-10a-5p__mir-10a__0__0__22MA	hsa-mir-10a	MI0000266	hsa-miR-10a-5p	MIMAT0000253	0	0	48579904	48579926	chr17	-	1	TACCCTGTAGATCCGAATTTGTA	TACCCTGTAGATCCGAATTTGTG	rs375865628=23:G-A	not reported	not reported	1	1	1	1	ACCCTGT	5p	50.403	52.5982	62.8151	47.8296	0.9244	0.917234	0.927087	0.921892	[W (N)] and [W (T)] and [B/AA (N)] and [B/AA (T)]
miR-10a-5p__mir-10a__0__0__23M	hsa-mir-10a	MI0000266	hsa-miR-10a-5p	MIMAT0000253	0	0	48579904	48579926	chr17	-	0	TACCCTGTAGATCCGAATTTGTG	TACCCTGTAGATCCGAATTTGTG	not reported	not reported	not reported	1	1	1	1	ACCCTGT	5p	198.298	228.478	280.676	220.333	0.966679	0.963454	0.965783	0.965783	[W (N)] and [W (T)] and [B/AA (N)] and [B/AA (T)]
miR-10a-5p__mir-10a__0__0__2MA20M	hsa-mir-10a	MI0000266	hsa-miR-10a-5p	MIMAT0000253	0	0	48579904	48579926	chr17	-	1	TAACCTGTAGATCCGAATTTGTG	TACCCTGTAGATCCGAATTTGTG	not reported	3:C-A	not reported	0	0	0	1	AACCTGT	5p	1.00886	2.2605	1.03413	1.97158	0.0600143	0.319599	0.0318882	0.419921	[W (T)]
miR-10a-5p__mir-10a__0__0__3MA19M	hsa-mir-10a	MI0000266	hsa-miR-10a-5p	MIMAT0000253	0	0	48579904	48579926	chr17	-	1	TACACTGTAGATCCGAATTTGTG	TACCCTGTAGATCCGAATTTGTG	TCGA=4:C-A	not reported	not reported	1	0	0	0	ACACTGT	5p	1.87064	1.12855	2.59903	1.19901	0.465245	0.099785	0.306163	0.0476532	[B/AA (N)]
miR-10b-3p__mir-10b__0__0__22M	hsa-mir-10b	MI0000267	hsa-miR-10b-3p	MIMAT0004556	0	0	176150368	176150389	chr2	+	0	ACAGATTCGATTCTAGGGGAAT	ACAGATTCGATTCTAGGGGAAT	not reported	not reported	not reported	0	1	0	0	CAGATTC	3p	1.67632	1.82563	1.49246	2.23997	0.191329	0.405948	0.244178	0.283232	[B/AA (T)]
miR-10b-5p__mir-10b__+1__-1__1MA19M	hsa-mir-10b	MI0000267	hsa-miR-10b-5p	MIMAT0000254	1	-1	176150330	176150350	chr2	+	1	AACCTGTAGAACCGAATTTGT	ACCCTGTAGAACCGAATTTGT	not reported	2:C-A	not reported	1	0	1	0	ACCTGTA	5p	2.52452	1.38287	3.81211	1.30108	0.6134	0.14296	0.503404	0.158366	[W (N)] and [B/AA (N)]
miR-10b-5p__mir-10b__+1__-1__21M	hsa-mir-10b	MI0000267	hsa-miR-10b-5p	MIMAT0000254	1	-1	176150330	176150350	chr2	+	0	ACCCTGTAGAACCGAATTTGT	ACCCTGTAGAACCGAATTTGT	not reported	not reported	not reported	1	1	1	1	CCCTGTA	5p	199.28	180.403	227.878	215.308	0.963633	0.962737	0.965962	0.959334	[W (N)] and [W (T)] and [B/AA (N)] and [B/AA (T)]
miR-10b-5p__mir-10b__+1__-1__2MA18M	hsa-mir-10b	MI0000267	hsa-miR-10b-5p	MIMAT0000254	1	-1	176150330	176150350	chr2	+	1	ACACTGTAGAACCGAATTTGT	ACCCTGTAGAACCGAATTTGT	TCGA=3:C-A	not reported	not reported	0	1	0	0	CACTGTA	5p	1.05186	1.90881	1.07237	2.18261	0.0807954	0.388391	0.0542816	0.307775	[B/AA (T)]
miR-10b-5p__mir-10b__+1__-2__1MA18M	hsa-mir-10b	MI0000267	hsa-miR-10b-5p	MIMAT0000254	1	-2	176150330	176150349	chr2	+	1	AACCTGTAGAACCGAATTTG	ACCCTGTAGAACCGAATTTG	not reported	2:C-A	not reported	1	0	0	0	ACCTGTA	5p	1.59353	1.183	2.07742	1.1909	0.327302	0.0970978	0.21426	0.0768542	[B/AA (N)]
miR-10b-5p__mir-10b__+1__-2__20M	hsa-mir-10b	MI0000267	hsa-miR-10b-5p	MIMAT0000254	1	-2	176150330	176150349	chr2	+	0	ACCCTGTAGAACCGAATTTG	ACCCTGTAGAACCGAATTTG	not reported	not reported	not reported	1	1	1	1	CCCTGTA	5p	29.4369	35.6236	30.7055	39.7003	0.888212	0.907023	0.902544	0.90326	[W (N)] and [W (T)] and [B/AA (N)] and [B/AA (T)]
miR-10b-5p__mir-10b__+1__-3__19M	hsa-mir-10b	MI0000267	hsa-miR-10b-5p	MIMAT0000254	1	-3	176150330	176150348	chr2	+	0	ACCCTGTAGAACCGAATTT	ACCCTGTAGAACCGAATTT	not reported	not reported	not reported	1	1	1	1	CCCTGTA	5p	7.83937	8.03937	7.77691	9.29075	0.757255	0.789502	0.790219	0.774812	[W (N)] and [W (T)] and [B/AA (N)] and [B/AA (T)]
miR-10b-5p__mir-10b__+1__-4__18M	hsa-mir-10b	MI0000267	hsa-miR-10b-5p	MIMAT0000254	1	-4	176150330	176150347	chr2	+	0	ACCCTGTAGAACCGAATT	ACCCTGTAGAACCGAATT	not reported	not reported	not reported	1	1	1	1	CCCTGTA	5p	2.63835	2.45003	2.43132	2.68977	0.427087	0.510391	0.524006	0.47277	[W (N)] and [W (T)] and [B/AA (N)] and [B/AA (T)]
miR-10b-5p__mir-10b__+1__-5__17M	hsa-mir-10b	MI0000267	hsa-miR-10b-5p	MIMAT0000254	1	-5	176150330	176150346	chr2	+	0	ACCCTGTAGAACCGAAT	ACCCTGTAGAACCGAAT	not reported	not reported	not reported	1	1	0	0	CCCTGTA	5p	1.976	1.84388	2.05398	2.00197	0.317807	0.324794	0.345038	0.287352	[B/AA (N)] and [B/AA (T)]
miR-10b-5p__mir-10b__+1__-6__16M	hsa-mir-10b	MI0000267	hsa-miR-10b-5p	MIMAT0000254	1	-6	176150330	176150345	chr2	+	0	ACCCTGTAGAACCGAA	ACCCTGTAGAACCGAA	not reported	not reported	not reported	0	1	0	1	CCCTGTA	5p	1.90009	2.28669	1.55455	2.26892	0.20584	0.416876	0.316912	0.426729	[W (T)] and [B/AA (T)]
miR-10b-5p__mir-10b__+1__+1__23M	hsa-mir-10b	MI0000267	hsa-miR-10b-5p	MIMAT0000254	1	1	176150330	176150352	chr2	+	0	ACCCTGTAGAACCGAATTTGTGT	ACCCTGTAGAACCGAATTTGTGT	not reported	not reported	not reported	1	1	1	1	CCCTGTA	5p	31.7548	38.4809	35.6275	49.3243	0.898961	0.918667	0.907381	0.906485	[W (N)] and [W (T)] and [B/AA (N)] and [B/AA (T)]
miR-10b-5p__mir-10b__+1__0__1MA20M	hsa-mir-10b	MI0000267	hsa-miR-10b-5p	MIMAT0000254	1	0	176150330	176150351	chr2	+	1	AACCTGTAGAACCGAATTTGTG	ACCCTGTAGAACCGAATTTGTG	not reported	2:C-A	not reported	1	0	1	0	ACCTGTA	5p	2.11515	1.33376	3.1268	1.24911	0.544787	0.122358	0.398424	0.141705	[W (N)] and [B/AA (N)]
miR-10b-5p__mir-10b__+1__0__22M	hsa-mir-10b	MI0000267	hsa-miR-10b-5p	MIMAT0000254	1	0	176150330	176150351	chr2	+	0	ACCCTGTAGAACCGAATTTGTG	ACCCTGTAGAACCGAATTTGTG	not reported	not reported	not reported	1	1	1	1	CCCTGTA	5p	139.034	181.955	145.405	221.187	0.954497	0.963633	0.959154	0.959871	[W (N)] and [W (T)] and [B/AA (N)] and [B/AA (T)]
miR-10b-5p__mir-10b__+1__0__2MA19M	hsa-mir-10b	MI0000267	hsa-miR-10b-5p	MIMAT0000254	1	0	176150330	176150351	chr2	+	1	ACACTGTAGAACCGAATTTGTG	ACCCTGTAGAACCGAATTTGTG	TCGA=3:C-A	not reported	not reported	0	1	0	0	CACTGTA	5p	1.04712	1.96387	1.019	2.20922	0.0551774	0.398244	0.0521319	0.323003	[B/AA (T)]
miR-10b-5p__mir-10b__+2__-1__20M	hsa-mir-10b	MI0000267	hsa-miR-10b-5p	MIMAT0000254	2	-1	176150331	176150350	chr2	+	0	CCCTGTAGAACCGAATTTGT	CCCTGTAGAACCGAATTTGT	not reported	not reported	not reported	0	0	1	1	CCTGTAG	5p	2.30589	2.12469	1.8479	1.90894	0.264959	0.305088	0.453063	0.378896	[W (N)] and [W (T)]
miR-10b-5p__mir-10b__+2__0__21M	hsa-mir-10b	MI0000267	hsa-miR-10b-5p	MIMAT0000254	2	0	176150331	176150351	chr2	+	0	CCCTGTAGAACCGAATTTGTG	CCCTGTAGAACCGAATTTGTG	not reported	not reported	not reported	0	0	0	1	CCTGTAG	5p	1.78686	2.02276	1.50145	1.87525	0.193479	0.296489	0.279828	0.345217	[W (T)]
miR-10b-5p__mir-10b__0__-1__10MC11M	hsa-mir-10b	MI0000267	hsa-miR-10b-5p	MIMAT0000254	0	-1	176150329	176150350	chr2	+	1	TACCCTGTAGCACCGAATTTGT	TACCCTGTAGAACCGAATTTGT	not reported	11:A-C	not reported	0	1	0	1	ACCCTGT	5p	1.72659	4.48587	1.38926	4.77479	0.165711	0.679326	0.258868	0.676102	[W (T)] and [B/AA (T)]
miR-10b-5p__mir-10b__0__-1__11MG10M	hsa-mir-10b	MI0000267	hsa-miR-10b-5p	MIMAT0000254	0	-1	176150329	176150350	chr2	+	1	TACCCTGTAGAGCCGAATTTGT	TACCCTGTAGAACCGAATTTGT	not reported	12:A-G	not reported	1	0	1	0	ACCCTGT	5p	2.06649	1.40397	2.09086	1.30619	0.333751	0.145647	0.377463	0.164636	[W (N)] and [B/AA (N)]
miR-10b-5p__mir-10b__0__-1__13MA8M	hsa-mir-10b	MI0000267	hsa-miR-10b-5p	MIMAT0000254	0	-1	176150329	176150350	chr2	+	1	TACCCTGTAGAACAGAATTTGT	TACCCTGTAGAACCGAATTTGT	COSV100106875,TCGA=14:C-A	not reported	not reported	1	0	1	0	ACCCTGT	5p	2.30676	1.66839	2.52204	1.73354	0.450735	0.262809	0.453243	0.243282	[W (N)] and [B/AA (N)]
miR-10b-5p__mir-10b__0__-1__13MT8M	hsa-mir-10b	MI0000267	hsa-miR-10b-5p	MIMAT0000254	0	-1	176150329	176150350	chr2	+	1	TACCCTGTAGAACTGAATTTGT	TACCCTGTAGAACCGAATTTGT	COSV100106875,TCGA=14:C-T	not reported	not reported	1	0	0	0	ACCCTGT	5p	1.8228	1.61736	2.04016	1.80004	0.311179	0.278753	0.290577	0.230204	[B/AA (N)]
miR-10b-5p__mir-10b__0__-1__15MC6M	hsa-mir-10b	MI0000267	hsa-miR-10b-5p	MIMAT0000254	0	-1	176150329	176150350	chr2	+	1	TACCCTGTAGAACCGCATTTGT	TACCCTGTAGAACCGAATTTGT	not reported	16:A-C	not reported	1	0	0	0	ACCCTGT	5p	1.88242	1.18155	2.01866	1.1072	0.301147	0.0524901	0.31082	0.0759584	[B/AA (N)]
miR-10b-5p__mir-10b__0__-1__17MA4M	hsa-mir-10b	MI0000267	hsa-miR-10b-5p	MIMAT0000254	0	-1	176150329	176150350	chr2	+	1	TACCCTGTAGAACCGAAATTGT	TACCCTGTAGAACCGAATTTGT	not reported	18:T-A	not reported	1	1	1	0	ACCCTGT	5p	2.08686	1.94568	2.37712	2.00479	0.414726	0.326406	0.384808	0.317449	[W (N)] and [B/AA (N)] and [B/AA (T)]
miR-10b-5p__mir-10b__0__-1__1MC1MA18M	hsa-mir-10b	MI0000267	hsa-miR-10b-5p	MIMAT0000254	0	-1	176150329	176150350	chr2	+	2	TCCACTGTAGAACCGAATTTGT	TACCCTGTAGAACCGAATTTGT	rs1574971632=2:A-C;TCGA=4:C-A	not reported	not reported	1	0	1	0	CCACTGT	5p	2.1899	1.26856	3.40006	1.24724	0.577033	0.121462	0.424221	0.114117	[W (N)] and [B/AA (N)]
miR-10b-5p__mir-10b__0__-1__1MC20M	hsa-mir-10b	MI0000267	hsa-miR-10b-5p	MIMAT0000254	0	-1	176150329	176150350	chr2	+	1	TCCCCTGTAGAACCGAATTTGT	TACCCTGTAGAACCGAATTTGT	rs1574971632=2:A-C	not reported	not reported	1	0	1	0	CCCCTGT	5p	5.06349	1.57436	8.28487	1.48737	0.764601	0.204944	0.718918	0.218381	[W (N)] and [B/AA (N)]
miR-10b-5p__mir-10b__0__-1__22M	hsa-mir-10b	MI0000267	hsa-miR-10b-5p	MIMAT0000254	0	-1	176150329	176150350	chr2	+	0	TACCCTGTAGAACCGAATTTGT	TACCCTGTAGAACCGAATTTGT	not reported	not reported	not reported	1	1	1	1	ACCCTGT	5p	2430.65	2292.78	2996.14	2866.71	0.992655	0.994088	0.993372	0.993192	[W (N)] and [W (T)] and [B/AA (N)] and [B/AA (T)]
miR-10b-5p__mir-10b__0__-1__2MA19M	hsa-mir-10b	MI0000267	hsa-miR-10b-5p	MIMAT0000254	0	-1	176150329	176150350	chr2	+	1	TAACCTGTAGAACCGAATTTGT	TACCCTGTAGAACCGAATTTGT	not reported	3:C-A	not reported	0	1	0	1	AACCTGT	5p	1.45893	7.69887	1.40133	9.02173	0.169832	0.786098	0.171981	0.769975	[W (T)] and [B/AA (T)]
miR-10b-5p__mir-10b__0__-1__2MAG18M	hsa-mir-10b	MI0000267	hsa-miR-10b-5p	MIMAT0000254	0	-1	176150329	176150350	chr2	+	2	TAAGCTGTAGAACCGAATTTGT	TACCCTGTAGAACCGAATTTGT	not reported	3:C-A;4:C-G	not reported	0	1	0	0	AAGCTGT	5p	1	1.53341	1	2.27605	0.000179147	0.419563	0.000179147	0.205482	[B/AA (T)]
miR-10b-5p__mir-10b__0__-1__2MG19M	hsa-mir-10b	MI0000267	hsa-miR-10b-5p	MIMAT0000254	0	-1	176150329	176150350	chr2	+	1	TAGCCTGTAGAACCGAATTTGT	TACCCTGTAGAACCGAATTTGT	not reported	3:C-G	not reported	1	1	1	0	AGCCTGT	5p	3.32921	1.82158	6.58258	2.14743	0.731637	0.375314	0.615013	0.281978	[W (N)] and [B/AA (N)] and [B/AA (T)]
miR-10b-5p__mir-10b__0__-1__3MA18M	hsa-mir-10b	MI0000267	hsa-miR-10b-5p	MIMAT0000254	0	-1	176150329	176150350	chr2	+	1	TACACTGTAGAACCGAATTTGT	TACCCTGTAGAACCGAATTTGT	TCGA=4:C-A	not reported	not reported	1	1	1	0	ACACTGT	5p	9.732	1.8826	16.5324	2.09087	0.841096	0.357578	0.818703	0.297564	[W (N)] and [B/AA (N)] and [B/AA (T)]
miR-10b-5p__mir-10b__0__-1__3MG18M	hsa-mir-10b	MI0000267	hsa-miR-10b-5p	MIMAT0000254	0	-1	176150329	176150350	chr2	+	1	TACGCTGTAGAACCGAATTTGT	TACCCTGTAGAACCGAATTTGT	not reported	4:C-G	not reported	0	1	0	1	ACGCTGT	5p	1.41299	2.487	1.39565	2.76879	0.167324	0.524185	0.159799	0.48119	[W (T)] and [B/AA (T)]
miR-10b-5p__mir-10b__0__-1__3MT18M	hsa-mir-10b	MI0000267	hsa-miR-10b-5p	MIMAT0000254	0	-1	176150329	176150350	chr2	+	1	TACTCTGTAGAACCGAATTTGT	TACCCTGTAGAACCGAATTTGT	TCGA=4:C-T	not reported	not reported	0	1	0	1	ACTCTGT	5p	1.65076	3.49914	1.47516	4.76743	0.188284	0.679147	0.236654	0.613759	[W (T)] and [B/AA (T)]
miR-10b-5p__mir-10b__0__-1__4MA17M	hsa-mir-10b	MI0000267	hsa-miR-10b-5p	MIMAT0000254	0	-1	176150329	176150350	chr2	+	1	TACCATGTAGAACCGAATTTGT	TACCCTGTAGAACCGAATTTGT	COSV60459893,TCGA=5:C-A	not reported	not reported	0	1	0	0	ACCATGT	5p	1.47423	1.31657	1.36119	2.26673	0.158904	0.416159	0.176639	0.13454	[B/AA (T)]
miR-10b-5p__mir-10b__0__-2__10MC10M	hsa-mir-10b	MI0000267	hsa-miR-10b-5p	MIMAT0000254	0	-2	176150329	176150349	chr2	+	1	TACCCTGTAGCACCGAATTTG	TACCCTGTAGAACCGAATTTG	not reported	11:A-C	not reported	0	1	0	1	ACCCTGT	5p	1.22194	2.18412	1.08652	2.14929	0.0858115	0.375672	0.105518	0.39914	[W (T)] and [B/AA (T)]
miR-10b-5p__mir-10b__0__-2__1MC19M	hsa-mir-10b	MI0000267	hsa-miR-10b-5p	MIMAT0000254	0	-2	176150329	176150349	chr2	+	1	TCCCCTGTAGAACCGAATTTG	TACCCTGTAGAACCGAATTTG	rs1574971632=2:A-C	not reported	not reported	1	0	1	0	CCCCTGT	5p	2.09105	1.28082	2.5947	1.24561	0.464171	0.120387	0.387137	0.118954	[W (N)] and [B/AA (N)]
miR-10b-5p__mir-10b__0__-2__21M	hsa-mir-10b	MI0000267	hsa-miR-10b-5p	MIMAT0000254	0	-2	176150329	176150349	chr2	+	0	TACCCTGTAGAACCGAATTTG	TACCCTGTAGAACCGAATTTG	not reported	not reported	not reported	1	1	1	1	ACCCTGT	5p	432.26	548.58	497.756	636.748	0.978502	0.981548	0.978861	0.980473	[W (N)] and [W (T)] and [B/AA (N)] and [B/AA (T)]
miR-10b-5p__mir-10b__0__-2__2MA18M	hsa-mir-10b	MI0000267	hsa-miR-10b-5p	MIMAT0000254	0	-2	176150329	176150349	chr2	+	1	TAACCTGTAGAACCGAATTTG	TACCCTGTAGAACCGAATTTG	not reported	3:C-A	not reported	0	1	0	1	AACCTGT	5p	1.10524	3.64441	1.14468	3.53868	0.105518	0.610176	0.0729129	0.625224	[W (T)] and [B/AA (T)]
miR-10b-5p__mir-10b__0__-2__2MG18M	hsa-mir-10b	MI0000267	hsa-miR-10b-5p	MIMAT0000254	0	-2	176150329	176150349	chr2	+	1	TAGCCTGTAGAACCGAATTTG	TACCCTGTAGAACCGAATTTG	not reported	3:C-G	not reported	1	0	1	0	AGCCTGT	5p	2.1588	1.58165	3.28808	1.75515	0.563597	0.267288	0.413114	0.221426	[W (N)] and [B/AA (N)]
miR-10b-5p__mir-10b__0__-2__3MA17M	hsa-mir-10b	MI0000267	hsa-miR-10b-5p	MIMAT0000254	0	-2	176150329	176150349	chr2	+	1	TACACTGTAGAACCGAATTTG	TACCCTGTAGAACCGAATTTG	TCGA=4:C-A	not reported	not reported	1	0	1	0	ACACTGT	5p	3.5246	1.37427	4.09933	1.42894	0.629165	0.189717	0.634181	0.155142	[W (N)] and [B/AA (N)]
miR-10b-5p__mir-10b__0__-2__3MT17M	hsa-mir-10b	MI0000267	hsa-miR-10b-5p	MIMAT0000254	0	-2	176150329	176150349	chr2	+	1	TACTCTGTAGAACCGAATTTG	TACCCTGTAGAACCGAATTTG	TCGA=4:C-T	not reported	not reported	0	1	0	0	ACTCTGT	5p	1.15239	1.83004	1.13948	2.00212	0.102472	0.325152	0.0858115	0.283769	[B/AA (T)]
miR-10b-5p__mir-10b__0__-3__20M	hsa-mir-10b	MI0000267	hsa-miR-10b-5p	MIMAT0000254	0	-3	176150329	176150348	chr2	+	0	TACCCTGTAGAACCGAATTT	TACCCTGTAGAACCGAATTT	not reported	not reported	not reported	1	1	1	1	ACCCTGT	5p	83.7656	63.795	78.1226	69.1623	0.93282	0.931028	0.944823	0.931028	[W (N)] and [W (T)] and [B/AA (N)] and [B/AA (T)]
miR-10b-5p__mir-10b__0__-3__3MA16M	hsa-mir-10b	MI0000267	hsa-miR-10b-5p	MIMAT0000254	0	-3	176150329	176150348	chr2	+	1	TACACTGTAGAACCGAATTT	TACCCTGTAGAACCGAATTT	TCGA=4:C-A	not reported	not reported	1	0	1	0	ACACTGT	5p	2.069	1.1345	2.29214	1.16318	0.394482	0.0831243	0.378538	0.0501612	[W (N)] and [B/AA (N)]
miR-10b-5p__mir-10b__0__-4__19M	hsa-mir-10b	MI0000267	hsa-miR-10b-5p	MIMAT0000254	0	-4	176150329	176150347	chr2	+	0	TACCCTGTAGAACCGAATT	TACCCTGTAGAACCGAATT	not reported	not reported	not reported	1	1	1	1	ACCCTGT	5p	15.1278	14.897	15.4509	14.8712	0.835005	0.840559	0.861161	0.842171	[W (N)] and [W (T)] and [B/AA (N)] and [B/AA (T)]
miR-10b-5p__mir-10b__0__-5__18M	hsa-mir-10b	MI0000267	hsa-miR-10b-5p	MIMAT0000254	0	-5	176150329	176150346	chr2	+	0	TACCCTGTAGAACCGAAT	TACCCTGTAGAACCGAAT	not reported	not reported	not reported	1	1	1	1	ACCCTGT	5p	5.87052	5.26802	5.73748	6.29288	0.704049	0.739162	0.746686	0.709065	[W (N)] and [W (T)] and [B/AA (N)] and [B/AA (T)]
miR-10b-5p__mir-10b__0__-6__17M	hsa-mir-10b	MI0000267	hsa-miR-10b-5p	MIMAT0000254	0	-6	176150329	176150345	chr2	+	0	TACCCTGTAGAACCGAA	TACCCTGTAGAACCGAA	not reported	not reported	not reported	1	1	1	1	ACCCTGT	5p	6.36522	6.90028	7.74542	9.23511	0.755822	0.788965	0.759943	0.756539	[W (N)] and [W (T)] and [B/AA (N)] and [B/AA (T)]
miR-10b-5p__mir-10b__0__-7__16M	hsa-mir-10b	MI0000267	hsa-miR-10b-5p	MIMAT0000254	0	-7	176150329	176150344	chr2	+	0	TACCCTGTAGAACCGA	TACCCTGTAGAACCGA	not reported	not reported	not reported	1	1	1	1	ACCCTGT	5p	18.8372	17.8516	22.2761	15.2902	0.865819	0.84253	0.876926	0.855786	[W (N)] and [W (T)] and [B/AA (N)] and [B/AA (T)]
miR-10b-5p__mir-10b__0__+1__24M	hsa-mir-10b	MI0000267	hsa-miR-10b-5p	MIMAT0000254	0	1	176150329	176150352	chr2	+	0	TACCCTGTAGAACCGAATTTGTGT	TACCCTGTAGAACCGAATTTGTGT	not reported	not reported	not reported	1	1	1	1	ACCCTGT	5p	7.6224	10.633	8.4773	12.8776	0.767467	0.826227	0.785382	0.812254	[W (N)] and [W (T)] and [B/AA (N)] and [B/AA (T)]
miR-10b-5p__mir-10b__0__0__23M	hsa-mir-10b	MI0000267	hsa-miR-10b-5p	MIMAT0000254	0	0	176150329	176150351	chr2	+	0	TACCCTGTAGAACCGAATTTGTG	TACCCTGTAGAACCGAATTTGTG	not reported	not reported	not reported	1	1	1	1	ACCCTGT	5p	163.537	231.085	182.317	286.557	0.960588	0.969008	0.961483	0.966141	[W (N)] and [W (T)] and [B/AA (N)] and [B/AA (T)]
miR-10b-5p__mir-10b__0__0__2MA20M	hsa-mir-10b	MI0000267	hsa-miR-10b-5p	MIMAT0000254	0	0	176150329	176150351	chr2	+	1	TAACCTGTAGAACCGAATTTGTG	TACCCTGTAGAACCGAATTTGTG	not reported	3:C-A	not reported	0	1	0	1	AACCTGT	5p	1.0314	2.23206	1	2.24802	0.000179147	0.407381	0.0444285	0.412576	[W (T)] and [B/AA (T)]
miR-1180-3p__mir-1180__0__-1__21M	hsa-mir-1180	MI0006273	hsa-miR-1180-3p	MIMAT0005825	0	-1	19344514	19344534	chr17	-	0	TTTCCGGCTCGCGTGGGTGTG	TTTCCGGCTCGCGTGGGTGTG	not reported	not reported	not reported	1	1	1	1	TTCCGGC	3p	4.09224	3.88842	2.20514	4.14984	0.370835	0.651738	0.674669	0.642601	[W (N)] and [W (T)] and [B/AA (N)] and [B/AA (T)]
miR-1180-3p__mir-1180__0__-2__20M	hsa-mir-1180	MI0006273	hsa-miR-1180-3p	MIMAT0005825	0	-2	19344515	19344534	chr17	-	0	TTTCCGGCTCGCGTGGGTGT	TTTCCGGCTCGCGTGGGTGT	not reported	not reported	not reported	0	1	1	1	TTCCGGC	3p	3.83868	3.17606	1.90617	3.10957	0.275528	0.569688	0.65747	0.581691	[W (N)] and [W (T)] and [B/AA (T)]
miR-1180-3p__mir-1180__0__-3__19M	hsa-mir-1180	MI0006273	hsa-miR-1180-3p	MIMAT0005825	0	-3	19344516	19344534	chr17	-	0	TTTCCGGCTCGCGTGGGTG	TTTCCGGCTCGCGTGGGTG	not reported	not reported	not reported	0	1	1	1	TTCCGGC	3p	2.88849	3.27324	1.54587	3.35951	0.204049	0.594769	0.562164	0.591723	[W (N)] and [W (T)] and [B/AA (T)]
miR-1180-3p__mir-1180__0__-5__17M	hsa-mir-1180	MI0006273	hsa-miR-1180-3p	MIMAT0005825	0	-5	19344518	19344534	chr17	-	0	TTTCCGGCTCGCGTGGG	TTTCCGGCTCGCGTGGG	not reported	not reported	not reported	1	1	1	1	TTCCGGC	3p	7.65936	8.38233	5.56653	9.02393	0.698853	0.786277	0.786277	0.781978	[W (N)] and [W (T)] and [B/AA (N)] and [B/AA (T)]
miR-1180-3p__mir-1180__0__-6__16M	hsa-mir-1180	MI0006273	hsa-miR-1180-3p	MIMAT0005825	0	-6	19344519	19344534	chr17	-	0	TTTCCGGCTCGCGTGG	TTTCCGGCTCGCGTGG	not reported	not reported	not reported	0	0	1	1	TTCCGGC	3p	2.35649	2.09468	1.78941	1.93065	0.250806	0.309746	0.463991	0.367789	[W (N)] and [W (T)]
miR-1180-3p__mir-1180__0__0__22M	hsa-mir-1180	MI0006273	hsa-miR-1180-3p	MIMAT0005825	0	0	19344513	19344534	chr17	-	0	TTTCCGGCTCGCGTGGGTGTGT	TTTCCGGCTCGCGTGGGTGTGT	not reported	not reported	not reported	1	1	1	1	TTCCGGC	3p	6.19341	7.89968	3.30786	9.0306	0.566284	0.786636	0.756001	0.773558	[W (N)] and [W (T)] and [B/AA (N)] and [B/AA (T)]
miR-12135__mir-12135__-3__-1__1MA9MC8M	hsa-mir-12135	MI0039739	hsa-miR-12135	MIMAT0049031	-3	-1	73299959	73299978	chr15	+	2	TATTAAAGGTTCGTTTGTAA	TTTTAAAGGTTTGTTTGTAA	not reported	2:T-A;12:T-C	not reported	1	1	0	1	ATTAAAG	3p	1.92546	2.46366	2.35668	2.59234	0.409351	0.492476	0.326585	0.475636	[W (T)] and [B/AA (N)] and [B/AA (T)]
miR-12135__mir-12135__-3__0__1MA9MC9M	hsa-mir-12135	MI0039739	hsa-miR-12135	MIMAT0049031	-3	0	73299959	73299979	chr15	+	2	TATTAAAGGTTCGTTTGTAAA	TTTTAAAGGTTTGTTTGTAAA	not reported	2:T-A;12:T-C	not reported	1	1	0	1	ATTAAAG	3p	1.77176	2.23522	2.25741	2.2787	0.385704	0.420459	0.274095	0.41383	[W (T)] and [B/AA (N)] and [B/AA (T)]
miR-12136__mir-12136__0__+5__23M	hsa-mir-12136	MI0039740	hsa-miR-12136	MIMAT0049032	0	5	632663	632685	chr1	-	0	GAAAAAGTCATGGAGGCCATGGG	GAAAAAGTCATGGAGGCCATGGG	not reported	not reported	not reported	0	1	0	1	AAAAAGT	5p	1.24879	2.42402	1.0793	2.52125	0.0836618	0.478502	0.111788	0.464708	[W (T)] and [B/AA (T)]
miR-1246__mir-1246__+1__0__18M	hsa-mir-1246	MI0006381	hsa-miR-1246	MIMAT0005898	1	0	176601024	176601041	chr2	-	0	ATGGATTTTTGGAGCAGG	ATGGATTTTTGGAGCAGG	not reported	not reported	not reported	1	1	0	1	TGGATTT	5p	1.34372	3.09638	2.0131	3.40963	0.299355	0.599248	0.141168	0.573092	[W (T)] and [B/AA (N)] and [B/AA (T)]
miR-1246__mir-1246__0__0__19M	hsa-mir-1246	MI0006381	hsa-miR-1246	MIMAT0005898	0	0	176601024	176601042	chr2	-	0	AATGGATTTTTGGAGCAGG	AATGGATTTTTGGAGCAGG	not reported	not reported	not reported	0	1	0	1	ATGGATT	5p	1.24641	3.21229	1.47416	3.60985	0.188105	0.614833	0.11125	0.585632	[W (T)] and [B/AA (T)]
miR-1247-3p__mir-1247__+3__-1__20M	hsa-mir-1247	MI0006382	hsa-miR-1247-3p	MIMAT0022721	3	-1	101560327	101560346	chr14	-	0	CGGGAACGTCGAGACTGGAG	CGGGAACGTCGAGACTGGAG	not reported	not reported	not reported	1	0	1	1	GGGAACG	3p	5.81222	2.21139	3.69544	1.86024	0.604801	0.292906	0.745611	0.407202	[W (N)] and [W (T)] and [B/AA (N)]
miR-1247-3p__mir-1247__+3__-5__16M	hsa-mir-1247	MI0006382	hsa-miR-1247-3p	MIMAT0022721	3	-5	101560331	101560346	chr14	-	0	CGGGAACGTCGAGACT	CGGGAACGTCGAGACT	not reported	not reported	not reported	0	0	1	0	GGGAACG	3p	2.01821	1.12887	1.56516	1.0381	0.209244	0.0137943	0.358653	0.0480115	[W (N)]
miR-1247-3p__mir-1247__+3__0__20MT	hsa-mir-1247	MI0006382	hsa-miR-1247-3p	MIMAT0022721	3	0	101560326	101560346	chr14	-	1	CGGGAACGTCGAGACTGGAGT	CGGGAACGTCGAGACTGGAGC	TCGA=21:C-T	not reported	not reported	1	0	1	0	GGGAACG	3p	3.67151	1.50775	2.55954	1.34868	0.459154	0.162307	0.646363	0.199033	[W (N)] and [B/AA (N)]
miR-1247-3p__mir-1247__+3__0__21M	hsa-mir-1247	MI0006382	hsa-miR-1247-3p	MIMAT0022721	3	0	101560326	101560346	chr14	-	0	CGGGAACGTCGAGACTGGAGC	CGGGAACGTCGAGACTGGAGC	not reported	not reported	not reported	1	1	1	1	GGGAACG	3p	28.5424	6.17417	14.031	4.32462	0.826227	0.663024	0.900932	0.739878	[W (N)] and [W (T)] and [B/AA (N)] and [B/AA (T)]
miR-1247-5p__mir-1247__0__-1__21M	hsa-mir-1247	MI0006382	hsa-miR-1247-5p	MIMAT0005899	0	-1	101560363	101560383	chr14	-	0	ACCCGTCCCGTTCGTCCCCGG	ACCCGTCCCGTTCGTCCCCGG	not reported	not reported	not reported	1	0	1	0	CCCGTCC	5p	3.32589	1.83109	2.14163	1.60776	0.349695	0.230742	0.613938	0.284307	[W (N)] and [B/AA (N)]
miR-1247-5p__mir-1247__0__0__22M	hsa-mir-1247	MI0006382	hsa-miR-1247-5p	MIMAT0005899	0	0	101560362	101560383	chr14	-	0	ACCCGTCCCGTTCGTCCCCGGA	ACCCGTCCCGTTCGTCCCCGGA	not reported	not reported	not reported	1	1	1	1	CCCGTCC	5p	6.94249	3.02829	4.44672	2.8714	0.650484	0.537442	0.771946	0.564851	[W (N)] and [W (T)] and [B/AA (N)] and [B/AA (T)]
miR-125a-3p__mir-125a__0__-1__21M	hsa-mir-125a	MI0000469	hsa-miR-125a-3p	MIMAT0004602	0	-1	51693306	51693326	chr19	+	0	ACAGGTGAGGTTCTTGGGAGC	ACAGGTGAGGTTCTTGGGAGC	not reported	not reported	not reported	1	1	1	1	CAGGTGA	3p	3.7769	2.65798	3.06875	2.89024	0.539412	0.540666	0.653887	0.508599	[W (N)] and [W (T)] and [B/AA (N)] and [B/AA (T)]
miR-125a-3p__mir-125a__0__-2__20M	hsa-mir-125a	MI0000469	hsa-miR-125a-3p	MIMAT0004602	0	-2	51693306	51693325	chr19	+	0	ACAGGTGAGGTTCTTGGGAG	ACAGGTGAGGTTCTTGGGAG	not reported	not reported	not reported	0	1	1	0	CAGGTGA	3p	2.17013	1.9568	1.81851	2.17375	0.25833	0.384271	0.416876	0.321211	[W (N)] and [B/AA (T)]
miR-125a-3p__mir-125a__0__0__22M	hsa-mir-125a	MI0000469	hsa-miR-125a-3p	MIMAT0004602	0	0	51693306	51693327	chr19	+	0	ACAGGTGAGGTTCTTGGGAGCC	ACAGGTGAGGTTCTTGGGAGCC	not reported	not reported	not reported	1	1	1	0	CAGGTGA	3p	2.23328	1.78927	2.55937	2.00445	0.458975	0.325869	0.435507	0.273737	[W (N)] and [B/AA (N)] and [B/AA (T)]
miR-125a-5p__mir-125a__+1__-2__21M	hsa-mir-125a	MI0000469	hsa-miR-125a-5p	MIMAT0000443	1	-2	51693269	51693289	chr19	+	0	CCCTGAGACCCTTTAACCTGT	CCCTGAGACCCTTTAACCTGT	not reported	not reported	not reported	0	0	1	0	CCTGAGA	5p	2.07616	1.61522	1.48997	1.35995	0.190971	0.165711	0.381584	0.229667	[W (N)]
miR-125a-5p__mir-125a__0__-1__1MA21M	hsa-mir-125a	MI0000469	hsa-miR-125a-5p	MIMAT0000443	0	-1	51693268	51693290	chr19	+	1	TACCTGAGACCCTTTAACCTGTG	TCCCTGAGACCCTTTAACCTGTG	not reported	2:C-A	not reported	1	0	0	0	ACCTGAG	5p	1.5634	1.14326	2.16044	1.10146	0.357399	0.0490863	0.20387	0.0541025	[B/AA (N)]
miR-125a-5p__mir-125a__0__-1__22MA	hsa-mir-125a	MI0000469	hsa-miR-125a-5p	MIMAT0000443	0	-1	51693268	51693290	chr19	+	1	TCCCTGAGACCCTTTAACCTGTA	TCCCTGAGACCCTTTAACCTGTG	rs755486470=23:G-A	not reported	not reported	1	1	1	1	CCCTGAG	5p	5.13193	3.20817	4.67552	3.62851	0.663382	0.615729	0.721068	0.585274	[W (N)] and [W (T)] and [B/AA (N)] and [B/AA (T)]
miR-125a-5p__mir-125a__0__-1__23M	hsa-mir-125a	MI0000469	hsa-miR-125a-5p	MIMAT0000443	0	-1	51693268	51693290	chr19	+	0	TCCCTGAGACCCTTTAACCTGTG	TCCCTGAGACCCTTTAACCTGTG	not reported	not reported	not reported	1	1	1	1	CCCTGAG	5p	135.821	114.125	94.6718	135.739	0.939986	0.950735	0.958438	0.948047	[W (N)] and [W (T)] and [B/AA (N)] and [B/AA (T)]
miR-125a-5p__mir-125a__0__-2__10MT11M	hsa-mir-125a	MI0000469	hsa-miR-125a-5p	MIMAT0000443	0	-2	51693268	51693289	chr19	+	1	TCCCTGAGACTCTTTAACCTGT	TCCCTGAGACCCTTTAACCTGT	not reported	11:C-T	not reported	1	1	1	1	CCCTGAG	5p	5.04859	2.31358	4.67485	2.37545	0.663203	0.446077	0.718022	0.432641	[W (N)] and [W (T)] and [B/AA (N)] and [B/AA (T)]
miR-125a-5p__mir-125a__0__-2__1MA20M	hsa-mir-125a	MI0000469	hsa-miR-125a-5p	MIMAT0000443	0	-2	51693268	51693289	chr19	+	1	TACCTGAGACCCTTTAACCTGT	TCCCTGAGACCCTTTAACCTGT	not reported	2:C-A	not reported	1	0	1	0	ACCTGAG	5p	2.46345	1.29406	3.73914	1.22731	0.607668	0.114117	0.490505	0.124328	[W (N)] and [B/AA (N)]
miR-125a-5p__mir-125a__0__-2__22M	hsa-mir-125a	MI0000469	hsa-miR-125a-5p	MIMAT0000443	0	-2	51693268	51693289	chr19	+	0	TCCCTGAGACCCTTTAACCTGT	TCCCTGAGACCCTTTAACCTGT	not reported	not reported	not reported	1	1	1	1	CCCTGAG	5p	376.246	252.528	245.287	302.079	0.965245	0.969903	0.977427	0.967753	[W (N)] and [W (T)] and [B/AA (N)] and [B/AA (T)]
miR-125a-5p__mir-125a__0__-2__2MA19M	hsa-mir-125a	MI0000469	hsa-miR-125a-5p	MIMAT0000443	0	-2	51693268	51693289	chr19	+	1	TCACTGAGACCCTTTAACCTGT	TCCCTGAGACCCTTTAACCTGT	not reported	3:C-A	not reported	0	1	0	1	CACTGAG	5p	1.11185	2.23112	1	2.33173	0.000179147	0.43497	0.0752418	0.412397	[W (T)] and [B/AA (T)]
miR-125a-5p__mir-125a__0__-2__3MA18M	hsa-mir-125a	MI0000469	hsa-miR-125a-5p	MIMAT0000443	0	-2	51693268	51693289	chr19	+	1	TCCATGAGACCCTTTAACCTGT	TCCCTGAGACCCTTTAACCTGT	not reported	4:C-A	not reported	1	0	0	0	CCATGAG	5p	1.61792	1.10518	2.10692	1.12138	0.338588	0.059656	0.223397	0.0324257	[B/AA (N)]
miR-125a-5p__mir-125a__0__-2__6MC15M	hsa-mir-125a	MI0000469	hsa-miR-125a-5p	MIMAT0000443	0	-2	51693268	51693289	chr19	+	1	TCCCTGCGACCCTTTAACCTGT	TCCCTGAGACCCTTTAACCTGT	not reported	7:A-C	not reported	0	0	1	0	CCCTGCG	5p	2.06965	1.02567	1.13816	1.02049	0.101397	0.00662845	0.378717	0.00465783	[W (N)]
miR-125a-5p__mir-125a__0__-2__9MT12M	hsa-mir-125a	MI0000469	hsa-miR-125a-5p	MIMAT0000443	0	-2	51693268	51693289	chr19	+	1	TCCCTGAGATCCTTTAACCTGT	TCCCTGAGACCCTTTAACCTGT	not reported	10:C-T	not reported	1	0	1	0	CCCTGAG	5p	3.14444	1.38741	2.75451	1.37627	0.492655	0.170727	0.592261	0.160516	[W (N)] and [B/AA (N)]
miR-125a-5p__mir-125a__0__-3__21M	hsa-mir-125a	MI0000469	hsa-miR-125a-5p	MIMAT0000443	0	-3	51693268	51693288	chr19	+	0	TCCCTGAGACCCTTTAACCTG	TCCCTGAGACCCTTTAACCTG	not reported	not reported	not reported	1	1	1	1	CCCTGAG	5p	74.3607	52.3443	47.8797	57.825	0.912397	0.925475	0.941061	0.921175	[W (N)] and [W (T)] and [B/AA (N)] and [B/AA (T)]
miR-125a-5p__mir-125a__0__-4__20M	hsa-mir-125a	MI0000469	hsa-miR-125a-5p	MIMAT0000443	0	-4	51693268	51693287	chr19	+	0	TCCCTGAGACCCTTTAACCT	TCCCTGAGACCCTTTAACCT	not reported	not reported	not reported	1	1	1	1	CCCTGAG	5p	21.2997	8.27565	11.2346	8.36223	0.802042	0.774812	0.884808	0.780007	[W (N)] and [W (T)] and [B/AA (N)] and [B/AA (T)]
miR-125a-5p__mir-125a__0__-5__19M	hsa-mir-125a	MI0000469	hsa-miR-125a-5p	MIMAT0000443	0	-5	51693268	51693286	chr19	+	0	TCCCTGAGACCCTTTAACC	TCCCTGAGACCCTTTAACC	not reported	not reported	not reported	1	1	1	1	CCCTGAG	5p	7.44844	4.46037	4.81479	4.17504	0.669652	0.65335	0.782336	0.674131	[W (N)] and [W (T)] and [B/AA (N)] and [B/AA (T)]
miR-125a-5p__mir-125a__0__-6__18M	hsa-mir-125a	MI0000469	hsa-miR-125a-5p	MIMAT0000443	0	-6	51693268	51693285	chr19	+	0	TCCCTGAGACCCTTTAAC	TCCCTGAGACCCTTTAAC	not reported	not reported	not reported	1	1	1	1	CCCTGAG	5p	2.83317	2.1691	2.43695	2.35241	0.428341	0.440165	0.552311	0.394841	[W (N)] and [W (T)] and [B/AA (N)] and [B/AA (T)]
miR-125a-5p__mir-125a__0__-7__17M	hsa-mir-125a	MI0000469	hsa-miR-125a-5p	MIMAT0000443	0	-7	51693268	51693284	chr19	+	0	TCCCTGAGACCCTTTAA	TCCCTGAGACCCTTTAA	not reported	not reported	not reported	1	1	1	0	CCCTGAG	5p	2.16366	1.98795	2.10907	2.77899	0.339842	0.524901	0.414905	0.328914	[W (N)] and [B/AA (N)] and [B/AA (T)]
miR-125a-5p__mir-125a__0__-8__16M	hsa-mir-125a	MI0000469	hsa-miR-125a-5p	MIMAT0000443	0	-8	51693268	51693283	chr19	+	0	TCCCTGAGACCCTTTA	TCCCTGAGACCCTTTA	not reported	not reported	not reported	0	1	1	1	CCCTGAG	5p	3.62051	2.80948	1.99703	2.56733	0.291831	0.487997	0.641705	0.535829	[W (N)] and [W (T)] and [B/AA (T)]
miR-125a-5p__mir-125a__0__0__24M	hsa-mir-125a	MI0000469	hsa-miR-125a-5p	MIMAT0000443	0	0	51693268	51693291	chr19	+	0	TCCCTGAGACCCTTTAACCTGTGA	TCCCTGAGACCCTTTAACCTGTGA	not reported	not reported	not reported	1	1	1	1	CCCTGAG	5p	29.6136	40.3054	19.3833	48.1953	0.853816	0.917771	0.903081	0.90971	[W (N)] and [W (T)] and [B/AA (N)] and [B/AA (T)]
miR-125b-2-3p__mir-125b-2__+2__+1__21M	hsa-mir-125b-2	MI0000470	hsa-miR-125b-2-3p	MIMAT0004603	2	1	16590292	16590312	chr21	+	0	ACAAGTCAGGCTCTTGGGACC	ACAAGTCAGGCTCTTGGGACC	not reported	not reported	not reported	1	1	1	1	CAAGTCA	3p	6.09079	2.52182	5.99478	2.30038	0.712827	0.42637	0.752418	0.488176	[W (N)] and [W (T)] and [B/AA (N)] and [B/AA (T)]
miR-125b-2-3p__mir-125b-2__+2__+2__22M	hsa-mir-125b-2	MI0000470	hsa-miR-125b-2-3p	MIMAT0004603	2	2	16590292	16590313	chr21	+	0	ACAAGTCAGGCTCTTGGGACCT	ACAAGTCAGGCTCTTGGGACCT	not reported	not reported	not reported	1	1	1	1	CAAGTCA	3p	4.34042	2.70156	3.6421	2.64069	0.60086	0.501971	0.689717	0.51899	[W (N)] and [W (T)] and [B/AA (N)] and [B/AA (T)]
miR-125b-2-3p__mir-125b-2__+2__0__20M	hsa-mir-125b-2	MI0000470	hsa-miR-125b-2-3p	MIMAT0004603	2	0	16590292	16590311	chr21	+	0	ACAAGTCAGGCTCTTGGGAC	ACAAGTCAGGCTCTTGGGAC	not reported	not reported	not reported	1	1	1	1	CAAGTCA	3p	6.40329	2.88091	6.24785	2.64535	0.722143	0.502687	0.760838	0.547116	[W (N)] and [W (T)] and [B/AA (N)] and [B/AA (T)]
miR-125b-5p__mir-125b-1__+1__0__21M	hsa-mir-125b-1	MI0000446	hsa-miR-125b-5p	MIMAT0000423	1	0	122099809	122099829	chr11	-	0	CCCTGAGACCCTAACTTGTGA	CCCTGAGACCCTAACTTGTGA	not reported	not reported	not reported	0	1	0	1	CCTGAGA	5p	1.86829	2.6642	1.55186	2.29925	0.205124	0.425654	0.305446	0.510032	[W (T)] and [B/AA (T)]
miR-125b-5p__mir-125b-1__0__-1__10MT10M	hsa-mir-125b-1	MI0000446	hsa-miR-125b-5p	MIMAT0000423	0	-1	122099810	122099830	chr11	-	1	TCCCTGAGACTCTAACTTGTG	TCCCTGAGACCCTAACTTGTG	not reported	11:C-T	not reported	1	0	0	0	CCCTGAG	5p	1.97413	1.4081	2.00827	1.40123	0.297205	0.180222	0.344321	0.167144	[B/AA (N)]
miR-125b-5p__mir-125b-1__0__-1__13MC7M	hsa-mir-125b-1	MI0000446	hsa-miR-125b-5p	MIMAT0000423	0	-1	122099810	122099830	chr11	-	1	TCCCTGAGACCCTCACTTGTG	TCCCTGAGACCCTAACTTGTG	not reported	14:A-C	not reported	1	0	1	0	CCCTGAG	5p	3.75656	1.32757	5.33532	1.258	0.689896	0.127015	0.652275	0.139377	[W (N)] and [B/AA (N)]
miR-125b-5p__mir-125b-1__0__-1__1MA19M	hsa-mir-125b-1	MI0000446	hsa-miR-125b-5p	MIMAT0000423	0	-1	122099810	122099830	chr11	-	1	TACCTGAGACCCTAACTTGTG	TCCCTGAGACCCTAACTTGTG	not reported	2:C-A	not reported	1	0	0	0	ACCTGAG	5p	1.65546	1.17862	2.43607	1.13152	0.427983	0.0646722	0.238266	0.0743461	[B/AA (N)]
miR-125b-5p__mir-125b-1__0__-1__21M	hsa-mir-125b-1	MI0000446	hsa-miR-125b-5p	MIMAT0000423	0	-1	122099810	122099830	chr11	-	0	TCCCTGAGACCCTAACTTGTG	TCCCTGAGACCCTAACTTGTG	not reported	not reported	not reported	1	1	1	1	CCCTGAG	5p	127.255	99.8107	98.7538	87.0964	0.942135	0.938732	0.956109	0.943927	[W (N)] and [W (T)] and [B/AA (N)] and [B/AA (T)]
miR-125b-5p__mir-125b-1__0__-2__10MT9M	hsa-mir-125b-1	MI0000446	hsa-miR-125b-5p	MIMAT0000423	0	-2	122099811	122099830	chr11	-	1	TCCCTGAGACTCTAACTTGT	TCCCTGAGACCCTAACTTGT	not reported	11:C-T	not reported	1	0	1	0	CCCTGAG	5p	2.87421	1.73648	3.14681	1.6744	0.547653	0.247223	0.559298	0.26048	[W (N)] and [B/AA (N)]
miR-125b-5p__mir-125b-1__0__-2__13MC6M	hsa-mir-125b-1	MI0000446	hsa-miR-125b-5p	MIMAT0000423	0	-2	122099811	122099830	chr11	-	1	TCCCTGAGACCCTCACTTGT	TCCCTGAGACCCTAACTTGT	not reported	14:A-C	not reported	1	0	1	0	CCCTGAG	5p	2.00371	1.11424	2.17257	1.09396	0.36134	0.0442494	0.353278	0.0394124	[W (N)] and [B/AA (N)]
miR-125b-5p__mir-125b-1__0__-2__20M	hsa-mir-125b-1	MI0000446	hsa-miR-125b-5p	MIMAT0000423	0	-2	122099811	122099830	chr11	-	0	TCCCTGAGACCCTAACTTGT	TCCCTGAGACCCTAACTTGT	not reported	not reported	not reported	1	1	1	1	CCCTGAG	5p	37.4154	22.4722	23.6083	21.481	0.870656	0.866894	0.915442	0.87388	[W (N)] and [W (T)] and [B/AA (N)] and [B/AA (T)]
miR-125b-5p__mir-125b-1__0__-3__19M	hsa-mir-125b-1	MI0000446	hsa-miR-125b-5p	MIMAT0000423	0	-3	122099812	122099830	chr11	-	0	TCCCTGAGACCCTAACTTG	TCCCTGAGACCCTAACTTG	not reported	not reported	not reported	1	1	1	1	CCCTGAG	5p	14.8949	16.1179	8.56837	12.6858	0.768363	0.825152	0.85919	0.8488	[W (N)] and [W (T)] and [B/AA (N)] and [B/AA (T)]
miR-125b-5p__mir-125b-1__0__-4__18M	hsa-mir-125b-1	MI0000446	hsa-miR-125b-5p	MIMAT0000423	0	-4	122099813	122099830	chr11	-	0	TCCCTGAGACCCTAACTT	TCCCTGAGACCCTAACTT	not reported	not reported	not reported	1	1	1	1	CCCTGAG	5p	3.32022	3.46424	2.09841	3.34294	0.335185	0.593694	0.612863	0.610713	[W (N)] and [W (T)] and [B/AA (N)] and [B/AA (T)]
miR-125b-5p__mir-125b-1__0__-5__17M	hsa-mir-125b-1	MI0000446	hsa-miR-125b-5p	MIMAT0000423	0	-5	122099814	122099830	chr11	-	0	TCCCTGAGACCCTAACT	TCCCTGAGACCCTAACT	not reported	not reported	not reported	0	0	1	0	CCCTGAG	5p	2.07332	1.75686	1.70129	1.63276	0.233966	0.235041	0.379971	0.265675	[W (N)]
miR-125b-5p__mir-125b-1__0__-6__16M	hsa-mir-125b-1	MI0000446	hsa-miR-125b-5p	MIMAT0000423	0	-6	122099815	122099830	chr11	-	0	TCCCTGAGACCCTAAC	TCCCTGAGACCCTAAC	not reported	not reported	not reported	0	0	0	1	CCCTGAG	5p	1.89675	2.00622	1.44228	1.79266	0.18058	0.276783	0.315657	0.335185	[W (T)]
miR-125b-5p__mir-125b-1__0__0__10MT11M	hsa-mir-125b-1	MI0000446	hsa-miR-125b-5p	MIMAT0000423	0	0	122099809	122099830	chr11	-	1	TCCCTGAGACTCTAACTTGTGA	TCCCTGAGACCCTAACTTGTGA	not reported	11:C-T	not reported	1	1	1	1	CCCTGAG	5p	5.1655	3.45934	4.43363	3.28944	0.649767	0.58832	0.722322	0.610176	[W (N)] and [W (T)] and [B/AA (N)] and [B/AA (T)]
miR-125b-5p__mir-125b-1__0__0__13MC8M	hsa-mir-125b-1	MI0000446	hsa-miR-125b-5p	MIMAT0000423	0	0	122099809	122099830	chr11	-	1	TCCCTGAGACCCTCACTTGTGA	TCCCTGAGACCCTAACTTGTGA	not reported	14:A-C	not reported	1	0	1	0	CCCTGAG	5p	5.43006	1.57323	9.69866	1.47802	0.787173	0.202257	0.732354	0.217306	[W (N)] and [B/AA (N)]
miR-125b-5p__mir-125b-1__0__0__1MA20M	hsa-mir-125b-1	MI0000446	hsa-miR-125b-5p	MIMAT0000423	0	0	122099809	122099830	chr11	-	1	TACCTGAGACCCTAACTTGTGA	TCCCTGAGACCCTAACTTGTGA	not reported	2:C-A	not reported	1	0	1	0	ACCTGAG	5p	2.38218	1.33463	3.50305	1.25766	0.587066	0.126657	0.470799	0.142243	[W (N)] and [B/AA (N)]
miR-125b-5p__mir-125b-1__0__0__21MT	hsa-mir-125b-1	MI0000446	hsa-miR-125b-5p	MIMAT0000423	0	0	122099809	122099830	chr11	-	1	TCCCTGAGACCCTAACTTGTGT	TCCCTGAGACCCTAACTTGTGA	rs764155531=22:A-T	not reported	not reported	1	1	1	1	CCCTGAG	5p	5.32385	4.79926	3.39933	5.25978	0.576675	0.705661	0.728413	0.692583	[W (N)] and [W (T)] and [B/AA (N)] and [B/AA (T)]
miR-125b-5p__mir-125b-1__0__0__22M	hsa-mir-125b-1	MI0000446	hsa-miR-125b-5p	MIMAT0000423	0	0	122099809	122099830	chr11	-	0	TCCCTGAGACCCTAACTTGTGA	TCCCTGAGACCCTAACTTGTGA	not reported	not reported	not reported	1	1	1	1	CCCTGAG	5p	257.492	291.293	182.193	302.874	0.960408	0.970262	0.971157	0.970978	[W (N)] and [W (T)] and [B/AA (N)] and [B/AA (T)]
miR-125b-5p__mir-125b-1__0__0__2MA19M	hsa-mir-125b-1	MI0000446	hsa-miR-125b-5p	MIMAT0000423	0	0	122099809	122099830	chr11	-	1	TCACTGAGACCCTAACTTGTGA	TCCCTGAGACCCTAACTTGTGA	COSV101154464,TCGA=3:C-A	not reported	not reported	0	1	0	1	CACTGAG	5p	1.04112	2.38878	1	2.51011	0.000179147	0.475457	0.0490863	0.455213	[W (T)] and [B/AA (T)]
miR-126-3p__mir-126__-1__-1__22M	hsa-mir-126	MI0000471	hsa-miR-126-3p	MIMAT0000445	-1	-1	136670652	136670673	chr9	+	0	CTCGTACCGTGAGTAATAATGC	CTCGTACCGTGAGTAATAATGC	not reported	not reported	not reported	1	1	1	1	TCGTACC	3p	15.453	18.4074	27.052	20.0673	0.880867	0.862057	0.862594	0.858295	[W (N)] and [W (T)] and [B/AA (N)] and [B/AA (T)]
miR-126-3p__mir-126__-1__-2__21M	hsa-mir-126	MI0000471	hsa-miR-126-3p	MIMAT0000445	-1	-2	136670652	136670672	chr9	+	0	CTCGTACCGTGAGTAATAATG	CTCGTACCGTGAGTAATAATG	not reported	not reported	not reported	1	1	1	1	TCGTACC	3p	6.10846	3.63948	9.26865	3.09447	0.780186	0.567718	0.753135	0.624686	[W (N)] and [W (T)] and [B/AA (N)] and [B/AA (T)]
miR-126-3p__mir-126__-1__-6__17M	hsa-mir-126	MI0000471	hsa-miR-126-3p	MIMAT0000445	-1	-6	136670652	136670668	chr9	+	0	CTCGTACCGTGAGTAAT	CTCGTACCGTGAGTAAT	not reported	not reported	not reported	0	1	0	1	TCGTACC	3p	1.60169	2.81593	1.99975	3.6709	0.293085	0.619491	0.216589	0.537621	[W (T)] and [B/AA (T)]
miR-126-3p__mir-126__-1__0__23M	hsa-mir-126	MI0000471	hsa-miR-126-3p	MIMAT0000445	-1	0	136670652	136670674	chr9	+	0	CTCGTACCGTGAGTAATAATGCG	CTCGTACCGTGAGTAATAATGCG	not reported	not reported	not reported	1	1	1	1	TCGTACC	3p	11.4872	14.5674	17.3509	15.8857	0.846292	0.845396	0.837334	0.841096	[W (N)] and [W (T)] and [B/AA (N)] and [B/AA (T)]
miR-126-3p__mir-126__+1__-1__13MC6M	hsa-mir-126	MI0000471	hsa-miR-126-3p	MIMAT0000445	1	-1	136670654	136670673	chr9	+	1	CGTACCGTGAGTACTAATGC	CGTACCGTGAGTAATAATGC	not reported	14:A-C	not reported	1	0	0	0	GTACCGT	3p	1.98233	1.07493	2.42325	1.07161	0.425475	0.0315299	0.347546	0.0184522	[B/AA (N)]
miR-126-3p__mir-126__+1__-1__20M	hsa-mir-126	MI0000471	hsa-miR-126-3p	MIMAT0000445	1	-1	136670654	136670673	chr9	+	0	CGTACCGTGAGTAATAATGC	CGTACCGTGAGTAATAATGC	not reported	not reported	not reported	1	1	1	1	GTACCGT	3p	29.6378	17.4708	45.6214	16.1477	0.910247	0.847187	0.90326	0.854174	[W (N)] and [W (T)] and [B/AA (N)] and [B/AA (T)]
miR-126-3p__mir-126__+1__-2__19M	hsa-mir-126	MI0000471	hsa-miR-126-3p	MIMAT0000445	1	-2	136670654	136670672	chr9	+	0	CGTACCGTGAGTAATAATG	CGTACCGTGAGTAATAATG	not reported	not reported	not reported	1	1	1	1	GTACCGT	3p	6.95891	8.09239	9.81508	6.97417	0.788606	0.753493	0.772483	0.776066	[W (N)] and [W (T)] and [B/AA (N)] and [B/AA (T)]
miR-126-3p__mir-126__+1__-3__18M	hsa-mir-126	MI0000471	hsa-miR-126-3p	MIMAT0000445	1	-3	136670654	136670671	chr9	+	0	CGTACCGTGAGTAATAAT	CGTACCGTGAGTAATAAT	not reported	not reported	not reported	0	1	0	1	GTACCGT	3p	1.80919	2.24377	1.74429	2.54305	0.242565	0.482981	0.285919	0.416338	[W (T)] and [B/AA (T)]
miR-126-3p__mir-126__+1__-4__17M	hsa-mir-126	MI0000471	hsa-miR-126-3p	MIMAT0000445	1	-4	136670654	136670670	chr9	+	0	CGTACCGTGAGTAATAA	CGTACCGTGAGTAATAA	not reported	not reported	not reported	1	1	0	0	GTACCGT	3p	1.98168	1.81692	2.59066	2.00208	0.463454	0.324973	0.347008	0.280903	[B/AA (N)] and [B/AA (T)]
miR-126-3p__mir-126__+1__-5__16M	hsa-mir-126	MI0000471	hsa-miR-126-3p	MIMAT0000445	1	-5	136670654	136670669	chr9	+	0	CGTACCGTGAGTAATA	CGTACCGTGAGTAATA	not reported	not reported	not reported	1	0	1	1	GTACCGT	3p	3.82238	2.4791	4.59849	1.96857	0.658545	0.318882	0.656575	0.479219	[W (N)] and [W (T)] and [B/AA (N)]
miR-126-3p__mir-126__+1__0__12MC8M	hsa-mir-126	MI0000471	hsa-miR-126-3p	MIMAT0000445	1	0	136670654	136670674	chr9	+	1	CGTACCGTGAGTCATAATGCG	CGTACCGTGAGTAATAATGCG	not reported	13:A-C	not reported	1	0	1	0	GTACCGT	3p	2.50161	1.48317	4.50031	1.32944	0.652633	0.154783	0.497671	0.190792	[W (N)] and [B/AA (N)]
miR-126-3p__mir-126__+1__0__13MC7M	hsa-mir-126	MI0000471	hsa-miR-126-3p	MIMAT0000445	1	0	136670654	136670674	chr9	+	1	CGTACCGTGAGTACTAATGCG	CGTACCGTGAGTAATAATGCG	not reported	14:A-C	not reported	1	0	1	0	GTACCGT	3p	8.63196	1.39331	16.4587	1.34847	0.840738	0.162128	0.803475	0.162307	[W (N)] and [B/AA (N)]
miR-126-3p__mir-126__+1__0__1MT19M	hsa-mir-126	MI0000471	hsa-miR-126-3p	MIMAT0000445	1	0	136670654	136670674	chr9	+	1	CTTACCGTGAGTAATAATGCG	CGTACCGTGAGTAATAATGCG	COSV100451975,TCGA=2:G-T	not reported	not reported	0	1	0	1	TTACCGT	3p	1.30233	2.26041	1.32854	2.25646	0.152275	0.411322	0.127195	0.419742	[W (T)] and [B/AA (T)]
miR-126-3p__mir-126__+1__0__20MA	hsa-mir-126	MI0000471	hsa-miR-126-3p	MIMAT0000445	1	0	136670654	136670674	chr9	+	1	CGTACCGTGAGTAATAATGCA	CGTACCGTGAGTAATAATGCG	rs760999709=21:G-A	not reported	not reported	1	0	1	0	GTACCGT	3p	2.25387	1.6166	3.12678	1.72824	0.544608	0.261376	0.441419	0.230025	[W (N)] and [B/AA (N)]
miR-126-3p__mir-126__+1__0__20MT	hsa-mir-126	MI0000471	hsa-miR-126-3p	MIMAT0000445	1	0	136670654	136670674	chr9	+	1	CGTACCGTGAGTAATAATGCT	CGTACCGTGAGTAATAATGCG	rs760999709=21:G-T	not reported	not reported	1	0	1	0	GTACCGT	3p	2.43475	1.411	3.51443	1.49685	0.588678	0.206198	0.485668	0.168219	[W (N)] and [B/AA (N)]
miR-126-3p__mir-126__+1__0__21M	hsa-mir-126	MI0000471	hsa-miR-126-3p	MIMAT0000445	1	0	136670654	136670674	chr9	+	0	CGTACCGTGAGTAATAATGCG	CGTACCGTGAGTAATAATGCG	not reported	not reported	not reported	1	1	1	1	GTACCGT	3p	392.999	288.498	573.669	315.795	0.979756	0.971516	0.978323	0.970799	[W (N)] and [W (T)] and [B/AA (N)] and [B/AA (T)]
miR-126-3p__mir-126__+1__0__2MG18M	hsa-mir-126	MI0000471	hsa-miR-126-3p	MIMAT0000445	1	0	136670654	136670674	chr9	+	1	CGGACCGTGAGTAATAATGCG	CGTACCGTGAGTAATAATGCG	not reported	3:T-G	not reported	1	0	0	0	GGACCGT	3p	1.79324	1.10582	2.39723	1.09283	0.418846	0.0433536	0.281799	0.0327839	[B/AA (N)]
miR-126-3p__mir-126__+1__0__2MGC17M	hsa-mir-126	MI0000471	hsa-miR-126-3p	MIMAT0000445	1	0	136670654	136670674	chr9	+	2	CGGCCCGTGAGTAATAATGCG	CGTACCGTGAGTAATAATGCG	not reported	3:T-G;4:A-C	not reported	1	0	1	0	GGCCCGT	3p	2.70867	1.17262	4.26365	1.12394	0.640272	0.0609101	0.535471	0.0711215	[W (N)] and [B/AA (N)]
miR-126-3p__mir-126__+1__0__3MC17M	hsa-mir-126	MI0000471	hsa-miR-126-3p	MIMAT0000445	1	0	136670654	136670674	chr9	+	1	CGTCCCGTGAGTAATAATGCG	CGTACCGTGAGTAATAATGCG	not reported	4:A-C	not reported	1	0	1	0	GTCCCGT	3p	4.73993	1.16065	6.46689	1.17499	0.728592	0.0890362	0.706557	0.0639556	[W (N)] and [B/AA (N)]
miR-126-3p__mir-126__0__-1__13MC7M	hsa-mir-126	MI0000471	hsa-miR-126-3p	MIMAT0000445	0	-1	136670653	136670673	chr9	+	1	TCGTACCGTGAGTCATAATGC	TCGTACCGTGAGTAATAATGC	not reported	14:A-C	not reported	1	0	1	0	CGTACCG	3p	5.33999	1.28657	10.6732	1.25759	0.79828	0.126478	0.729129	0.121462	[W (N)] and [B/AA (N)]
miR-126-3p__mir-126__0__-1__17MC3M	hsa-mir-126	MI0000471	hsa-miR-126-3p	MIMAT0000445	0	-1	136670653	136670673	chr9	+	1	TCGTACCGTGAGTAATACTGC	TCGTACCGTGAGTAATAATGC	rs1298052992=18:A-C	not reported	not reported	1	1	1	1	CGTACCG	3p	2.01508	2.29313	2.50953	2.61237	0.446793	0.496059	0.357399	0.42852	[W (N)] and [W (T)] and [B/AA (N)] and [B/AA (T)]
miR-126-3p__mir-126__0__-1__1MA1MC17M	hsa-mir-126	MI0000471	hsa-miR-126-3p	MIMAT0000445	0	-1	136670653	136670673	chr9	+	2	TAGCACCGTGAGTAATAATGC	TCGTACCGTGAGTAATAATGC	not reported	2:C-A;4:T-C	not reported	1	0	0	0	AGCACCG	3p	1.69716	1.08811	2.17211	1.09682	0.361161	0.0463991	0.24991	0.0250806	[B/AA (N)]
miR-126-3p__mir-126__0__-1__20MT	hsa-mir-126	MI0000471	hsa-miR-126-3p	MIMAT0000445	0	-1	136670653	136670673	chr9	+	1	TCGTACCGTGAGTAATAATGT	TCGTACCGTGAGTAATAATGC	rs1037814508=21:C-T	not reported	not reported	1	0	0	0	CGTACCG	3p	1.50574	1.47571	2.50741	1.55989	0.446077	0.219635	0.184701	0.18703	[B/AA (N)]
miR-126-3p__mir-126__0__-1__21M	hsa-mir-126	MI0000471	hsa-miR-126-3p	MIMAT0000445	0	-1	136670653	136670673	chr9	+	0	TCGTACCGTGAGTAATAATGC	TCGTACCGTGAGTAATAATGC	not reported	not reported	not reported	1	1	1	1	CGTACCG	3p	133.882	99.1904	227.607	106.75	0.963454	0.94536	0.957542	0.943748	[W (N)] and [W (T)] and [B/AA (N)] and [B/AA (T)]
miR-126-3p__mir-126__0__-1__3MG17M	hsa-mir-126	MI0000471	hsa-miR-126-3p	MIMAT0000445	0	-1	136670653	136670673	chr9	+	1	TCGGACCGTGAGTAATAATGC	TCGTACCGTGAGTAATAATGC	not reported	4:T-G	not reported	0	1	0	1	CGGACCG	3p	1	2.37552	1	2.47497	0.000179147	0.46632	0.000179147	0.452347	[W (T)] and [B/AA (T)]
miR-126-3p__mir-126__0__-2__13MC6M	hsa-mir-126	MI0000471	hsa-miR-126-3p	MIMAT0000445	0	-2	136670653	136670672	chr9	+	1	TCGTACCGTGAGTCATAATG	TCGTACCGTGAGTAATAATG	not reported	14:A-C	not reported	1	0	1	0	CGTACCG	3p	2.63471	1.11158	3.27114	1.08838	0.561627	0.041383	0.522752	0.0374418	[W (N)] and [B/AA (N)]
miR-126-3p__mir-126__0__-2__1MA1MC16M	hsa-mir-126	MI0000471	hsa-miR-126-3p	MIMAT0000445	0	-2	136670653	136670672	chr9	+	2	TAGCACCGTGAGTAATAATG	TCGTACCGTGAGTAATAATG	not reported	2:C-A;4:T-C	not reported	1	0	0	0	AGCACCG	3p	1.84549	1.0767	2.4701	1.07139	0.437298	0.0313508	0.297205	0.0193479	[B/AA (N)]
miR-126-3p__mir-126__0__-2__20M	hsa-mir-126	MI0000471	hsa-miR-126-3p	MIMAT0000445	0	-2	136670653	136670672	chr9	+	0	TCGTACCGTGAGTAATAATG	TCGTACCGTGAGTAATAATG	not reported	not reported	not reported	1	1	1	1	CGTACCG	3p	45.9537	39.3332	69.6216	38.1427	0.928162	0.90541	0.922429	0.908635	[W (N)] and [W (T)] and [B/AA (N)] and [B/AA (T)]
miR-126-3p__mir-126__0__-3__19M	hsa-mir-126	MI0000471	hsa-miR-126-3p	MIMAT0000445	0	-3	136670653	136670671	chr9	+	0	TCGTACCGTGAGTAATAAT	TCGTACCGTGAGTAATAAT	not reported	not reported	not reported	1	1	1	1	CGTACCG	3p	5.15525	5.86353	6.43139	7.04876	0.727517	0.754927	0.721963	0.730921	[W (N)] and [W (T)] and [B/AA (N)] and [B/AA (T)]
miR-126-3p__mir-126__0__-4__18M	hsa-mir-126	MI0000471	hsa-miR-126-3p	MIMAT0000445	0	-4	136670653	136670670	chr9	+	0	TCGTACCGTGAGTAATAA	TCGTACCGTGAGTAATAA	not reported	not reported	not reported	1	1	1	1	CGTACCG	3p	2.46746	3.44082	2.6859	4.68604	0.479398	0.675743	0.491043	0.608384	[W (N)] and [W (T)] and [B/AA (N)] and [B/AA (T)]
miR-126-3p__mir-126__0__-5__13MC3M	hsa-mir-126	MI0000471	hsa-miR-126-3p	MIMAT0000445	0	-5	136670653	136670669	chr9	+	1	TCGTACCGTGAGTCATA	TCGTACCGTGAGTAATA	not reported	14:A-C	not reported	1	0	1	0	CGTACCG	3p	3.24	1.17093	3.98764	1.20466	0.622178	0.102831	0.604622	0.0698674	[W (N)] and [B/AA (N)]
miR-126-3p__mir-126__0__-5__17M	hsa-mir-126	MI0000471	hsa-miR-126-3p	MIMAT0000445	0	-5	136670653	136670669	chr9	+	0	TCGTACCGTGAGTAATA	TCGTACCGTGAGTAATA	not reported	not reported	not reported	1	1	1	1	CGTACCG	3p	24.0665	56.5383	36.7039	91.6807	0.900215	0.940165	0.891078	0.925475	[W (N)] and [W (T)] and [B/AA (N)] and [B/AA (T)]
miR-126-3p__mir-126__0__-6__16M	hsa-mir-126	MI0000471	hsa-miR-126-3p	MIMAT0000445	0	-6	136670653	136670668	chr9	+	0	TCGTACCGTGAGTAAT	TCGTACCGTGAGTAAT	not reported	not reported	not reported	1	1	1	1	CGTACCG	3p	2.38202	4.11932	2.95308	4.38693	0.524006	0.665174	0.47062	0.656037	[W (N)] and [W (T)] and [B/AA (N)] and [B/AA (T)]
miR-126-3p__mir-126__0__0__10MC11M	hsa-mir-126	MI0000471	hsa-miR-126-3p	MIMAT0000445	0	0	136670653	136670674	chr9	+	1	TCGTACCGTGCGTAATAATGCG	TCGTACCGTGAGTAATAATGCG	not reported	11:A-C	not reported	0	1	0	1	CGTACCG	3p	1.17353	2.81098	1.05545	3.19023	0.0757793	0.577571	0.0920817	0.536546	[W (T)] and [B/AA (T)]
miR-126-3p__mir-126__0__0__13MC3MC4M	hsa-mir-126	MI0000471	hsa-miR-126-3p	MIMAT0000445	0	0	136670653	136670674	chr9	+	2	TCGTACCGTGAGTCATACTGCG	TCGTACCGTGAGTAATAATGCG	rs1298052992=18:A-C	14:A-C	not reported	1	0	1	0	CGTACCG	3p	2.05674	1.16185	2.70964	1.14753	0.484414	0.0721963	0.372805	0.0648513	[W (N)] and [B/AA (N)]
miR-126-3p__mir-126__0__0__13MC8M	hsa-mir-126	MI0000471	hsa-miR-126-3p	MIMAT0000445	0	0	136670653	136670674	chr9	+	1	TCGTACCGTGAGTCATAATGCG	TCGTACCGTGAGTAATAATGCG	not reported	14:A-C	not reported	1	0	1	0	CGTACCG	3p	16.6038	1.85928	43.2822	1.75958	0.907918	0.269079	0.868327	0.291831	[W (N)] and [B/AA (N)]
miR-126-3p__mir-126__0__0__17MC4M	hsa-mir-126	MI0000471	hsa-miR-126-3p	MIMAT0000445	0	0	136670653	136670674	chr9	+	1	TCGTACCGTGAGTAATACTGCG	TCGTACCGTGAGTAATAATGCG	rs1298052992=18:A-C	not reported	not reported	1	1	1	1	CGTACCG	3p	4.40538	8.65386	8.20489	12.7174	0.762988	0.825511	0.693658	0.786277	[W (N)] and [W (T)] and [B/AA (N)] and [B/AA (T)]
miR-126-3p__mir-126__0__0__1MA1MC18M	hsa-mir-126	MI0000471	hsa-miR-126-3p	MIMAT0000445	0	0	136670653	136670674	chr9	+	2	TAGCACCGTGAGTAATAATGCG	TCGTACCGTGAGTAATAATGCG	not reported	2:C-A;4:T-C	not reported	1	0	1	0	AGCACCG	3p	3.74825	1.3693	7.32875	1.21004	0.748836	0.106234	0.651917	0.153887	[W (N)] and [B/AA (N)]
miR-126-3p__mir-126__0__0__1MA20M	hsa-mir-126	MI0000471	hsa-miR-126-3p	MIMAT0000445	0	0	136670653	136670674	chr9	+	1	TAGTACCGTGAGTAATAATGCG	TCGTACCGTGAGTAATAATGCG	not reported	2:C-A	not reported	1	0	1	0	AGTACCG	3p	2.85797	1.56057	4.60059	1.57632	0.659083	0.223755	0.557327	0.214439	[W (N)] and [B/AA (N)]
miR-126-3p__mir-126__0__0__1MAT19M	hsa-mir-126	MI0000471	hsa-miR-126-3p	MIMAT0000445	0	0	136670653	136670674	chr9	+	2	TATTACCGTGAGTAATAATGCG	TCGTACCGTGAGTAATAATGCG	COSV100451975,TCGA=3:G-T	2:C-A	not reported	1	0	1	0	ATTACCG	3p	2.17572	1.17304	3.67117	1.16655	0.602651	0.0850949	0.418488	0.0714798	[W (N)] and [B/AA (N)]
miR-126-3p__mir-126__0__0__21MA	hsa-mir-126	MI0000471	hsa-miR-126-3p	MIMAT0000445	0	0	136670653	136670674	chr9	+	1	TCGTACCGTGAGTAATAATGCA	TCGTACCGTGAGTAATAATGCG	rs760999709=22:G-A	not reported	not reported	1	1	1	1	CGTACCG	3p	5.05212	4.00604	8.07081	4.21847	0.761018	0.656396	0.71856	0.650125	[W (N)] and [W (T)] and [B/AA (N)] and [B/AA (T)]
miR-126-3p__mir-126__0__0__21MT	hsa-mir-126	MI0000471	hsa-miR-126-3p	MIMAT0000445	0	0	136670653	136670674	chr9	+	1	TCGTACCGTGAGTAATAATGCT	TCGTACCGTGAGTAATAATGCG	rs760999709=22:G-T	not reported	not reported	1	1	1	1	CGTACCG	3p	2.76332	2.1675	3.80179	2.37756	0.612863	0.446793	0.54407	0.394482	[W (N)] and [W (T)] and [B/AA (N)] and [B/AA (T)]
miR-126-3p__mir-126__0__0__22M	hsa-mir-126	MI0000471	hsa-miR-126-3p	MIMAT0000445	0	0	136670653	136670674	chr9	+	0	TCGTACCGTGAGTAATAATGCG	TCGTACCGTGAGTAATAATGCG	not reported	not reported	not reported	1	1	1	1	CGTACCG	3p	857.627	1207.24	1146.16	1453.88	0.987639	0.989789	0.986564	0.988355	[W (N)] and [W (T)] and [B/AA (N)] and [B/AA (T)]
miR-126-3p__mir-126__0__0__2MT19M	hsa-mir-126	MI0000471	hsa-miR-126-3p	MIMAT0000445	0	0	136670653	136670674	chr9	+	1	TCTTACCGTGAGTAATAATGCG	TCGTACCGTGAGTAATAATGCG	COSV100451975,TCGA=3:G-T	not reported	not reported	1	0	1	0	CTTACCG	3p	2.69727	1.4775	4.28582	1.51569	0.641705	0.210856	0.533859	0.188284	[W (N)] and [B/AA (N)]
miR-126-3p__mir-126__0__0__3MG18M	hsa-mir-126	MI0000471	hsa-miR-126-3p	MIMAT0000445	0	0	136670653	136670674	chr9	+	1	TCGGACCGTGAGTAATAATGCG	TCGTACCGTGAGTAATAATGCG	not reported	4:T-G	not reported	0	1	0	1	CGGACCG	3p	1.18478	10.0928	1	13.5328	0.000179147	0.832318	0.0947689	0.806342	[W (T)] and [B/AA (T)]
miR-126-3p__mir-126__0__0__4MC17M	hsa-mir-126	MI0000471	hsa-miR-126-3p	MIMAT0000445	0	0	136670653	136670674	chr9	+	1	TCGTCCCGTGAGTAATAATGCG	TCGTACCGTGAGTAATAATGCG	not reported	5:A-C	not reported	0	1	0	0	CGTCCCG	3p	1	1.1832	1	2.81411	0.000179147	0.531351	0.000179147	0.0772125	[B/AA (T)]
miR-126-3p__mir-126__0__0__6MT15M	hsa-mir-126	MI0000471	hsa-miR-126-3p	MIMAT0000445	0	0	136670653	136670674	chr9	+	1	TCGTACTGTGAGTAATAATGCG	TCGTACCGTGAGTAATAATGCG	TCGA=7:C-T	not reported	not reported	1	0	1	0	CGTACTG	3p	2.72655	1.66645	2.94544	1.54895	0.52311	0.217664	0.538696	0.242924	[W (N)] and [B/AA (N)]
miR-126-5p__mir-126__+1__+1__21M	hsa-mir-126	MI0000471	hsa-miR-126-5p	MIMAT0000444	1	1	136670617	136670637	chr9	+	0	ATTATTACTTTTGGTACGCGC	ATTATTACTTTTGGTACGCGC	not reported	not reported	not reported	1	0	0	0	TTATTAC	5p	1.83025	1.18098	2.24442	1.19441	0.3823	0.0978144	0.293264	0.0756001	[B/AA (N)]
miR-126-5p__mir-126__+1__+2__22M	hsa-mir-126	MI0000471	hsa-miR-126-5p	MIMAT0000444	1	2	136670617	136670638	chr9	+	0	ATTATTACTTTTGGTACGCGCT	ATTATTACTTTTGGTACGCGCT	not reported	not reported	not reported	1	0	1	0	TTATTAC	5p	2.51716	1.84335	3.42013	1.98008	0.578825	0.321211	0.500537	0.287173	[W (N)] and [B/AA (N)]
miR-126-5p__mir-126__0__-1__20M	hsa-mir-126	MI0000471	hsa-miR-126-5p	MIMAT0000444	0	-1	136670616	136670635	chr9	+	0	CATTATTACTTTTGGTACGC	CATTATTACTTTTGGTACGC	not reported	not reported	not reported	1	1	1	1	ATTATTA	5p	54.5416	23.6992	116.814	22.729	0.948764	0.871014	0.930312	0.878538	[W (N)] and [W (T)] and [B/AA (N)] and [B/AA (T)]
miR-126-5p__mir-126__0__-2__19M	hsa-mir-126	MI0000471	hsa-miR-126-5p	MIMAT0000444	0	-2	136670616	136670634	chr9	+	0	CATTATTACTTTTGGTACG	CATTATTACTTTTGGTACG	not reported	not reported	not reported	1	1	1	1	ATTATTA	5p	8.8211	7.26378	13.0451	7.57023	0.818524	0.765317	0.805267	0.761555	[W (N)] and [W (T)] and [B/AA (N)] and [B/AA (T)]
miR-126-5p__mir-126__0__-3__18M	hsa-mir-126	MI0000471	hsa-miR-126-5p	MIMAT0000444	0	-3	136670616	136670633	chr9	+	0	CATTATTACTTTTGGTAC	CATTATTACTTTTGGTAC	not reported	not reported	not reported	1	0	0	0	ATTATTA	5p	1.92177	1.7625	2.21965	1.86447	0.374955	0.293981	0.324973	0.268183	[B/AA (N)]
miR-126-5p__mir-126__0__-4__17M	hsa-mir-126	MI0000471	hsa-miR-126-5p	MIMAT0000444	0	-4	136670616	136670632	chr9	+	0	CATTATTACTTTTGGTA	CATTATTACTTTTGGTA	not reported	not reported	not reported	1	0	1	0	ATTATTA	5p	2.18334	1.67429	2.41688	1.92477	0.423683	0.308671	0.422429	0.244894	[W (N)] and [B/AA (N)]
miR-126-5p__mir-126__0__-5__16M	hsa-mir-126	MI0000471	hsa-miR-126-5p	MIMAT0000444	0	-5	136670616	136670631	chr9	+	0	CATTATTACTTTTGGT	CATTATTACTTTTGGT	not reported	not reported	not reported	1	0	0	0	ATTATTA	5p	1.77074	1.7497	2.0452	1.63276	0.313687	0.234862	0.2732	0.263705	[B/AA (N)]
miR-126-5p__mir-126__0__+1__22M	hsa-mir-126	MI0000471	hsa-miR-126-5p	MIMAT0000444	0	1	136670616	136670637	chr9	+	0	CATTATTACTTTTGGTACGCGC	CATTATTACTTTTGGTACGCGC	not reported	not reported	not reported	1	1	1	1	ATTATTA	5p	4.04532	2.28027	6.78873	2.46059	0.737728	0.462917	0.671265	0.424937	[W (N)] and [W (T)] and [B/AA (N)] and [B/AA (T)]
miR-126-5p__mir-126__0__0__21M	hsa-mir-126	MI0000471	hsa-miR-126-5p	MIMAT0000444	0	0	136670616	136670636	chr9	+	0	CATTATTACTTTTGGTACGCG	CATTATTACTTTTGGTACGCG	not reported	not reported	not reported	1	1	1	1	ATTATTA	5p	132.775	155.856	314.631	170.445	0.969008	0.957005	0.957184	0.95593	[W (N)] and [W (T)] and [B/AA (N)] and [B/AA (T)]
miR-126-5p__mir-126__0__0__2MG18M	hsa-mir-126	MI0000471	hsa-miR-126-5p	MIMAT0000444	0	0	136670616	136670636	chr9	+	1	CAGTATTACTTTTGGTACGCG	CATTATTACTTTTGGTACGCG	rs777307469=3:T-G	not reported	not reported	1	0	0	0	AGTATTA	5p	1.77602	1.11275	2.2599	1.05001	0.386241	0.0198853	0.275349	0.0383375	[B/AA (N)]
miR-126-5p__mir-126__0__0__3MG17M	hsa-mir-126	MI0000471	hsa-miR-126-5p	MIMAT0000444	0	0	136670616	136670636	chr9	+	1	CATGATTACTTTTGGTACGCG	CATTATTACTTTTGGTACGCG	not reported	4:T-G	not reported	0	1	0	1	ATGATTA	5p	1.02304	2.20005	1	2.29535	0.000179147	0.424758	0.0385167	0.40344	[W (T)] and [B/AA (T)]
miR-1260a__mir-1260a__-2__0__10MG9M	hsa-mir-1260a	MI0006394	hsa-miR-1260a	MIMAT0005911	-2	0	77266229	77266248	chr14	+	1	TCATCCCACCGCTGCCACCA	TCATCCCACCTCTGCCACCA	not reported	11:T-G	not reported	0	1	1	1	CATCCCA	5p	2.77321	2.21773	1.56988	2.09144	0.209781	0.357936	0.545145	0.408993	[W (N)] and [W (T)] and [B/AA (T)]
miR-1260a__mir-1260a__-2__0__9MT4MA5M	hsa-mir-1260a	MI0006394	hsa-miR-1260a	MIMAT0005911	-2	0	77266229	77266248	chr14	+	2	TCATCCCACTTCTGACACCA	TCATCCCACCTCTGCCACCA	rs774008120=10:C-T	15:C-A	not reported	1	1	1	1	CATCCCA	5p	5.64405	5.14886	2.85878	4.19665	0.510391	0.654783	0.739878	0.704228	[W (N)] and [W (T)] and [B/AA (N)] and [B/AA (T)]
miR-1260a__mir-1260a__0__+1__8MG10M	hsa-mir-1260a	MI0006394	hsa-miR-1260a	MIMAT0005911	0	1	77266231	77266249	chr14	+	1	ATCCCACCGCTGCCACCAA	ATCCCACCTCTGCCACCAA	not reported	9:T-G	not reported	1	1	1	1	TCCCACC	5p	3.26796	2.32886	2.95333	2.04643	0.524185	0.340021	0.607488	0.438552	[W (N)] and [W (T)] and [B/AA (N)] and [B/AA (T)]
miR-1260a__mir-1260a__0__+3__8MG12M	hsa-mir-1260a	MI0006394	hsa-miR-1260a	MIMAT0005911	0	3	77266231	77266251	chr14	+	1	ATCCCACCGCTGCCACCAAAA	ATCCCACCTCTGCCACCAAAA	not reported	9:T-G	not reported	0	0	1	0	TCCCACC	5p	2.4892	1.59739	1.95041	1.53364	0.282874	0.214439	0.494984	0.224472	[W (N)]
miR-1260b__mir-1260b__0__-1__18M	hsa-mir-1260b	MI0014197	hsa-miR-1260b	MIMAT0015041	0	-1	96341447	96341464	chr11	+	0	ATCCCACCACTGCCACCA	ATCCCACCACTGCCACCA	not reported	not reported	not reported	1	1	1	1	TCCCACC	5p	3.15238	2.2546	2.99697	2.29556	0.529918	0.424937	0.593873	0.418667	[W (N)] and [W (T)] and [B/AA (N)] and [B/AA (T)]
miR-1266-5p__mir-1266__0__-1__22M	hsa-mir-1266	MI0006403	hsa-miR-1266-5p	MIMAT0005920	0	-1	52277167	52277188	chr15	-	0	CCTCAGGGCTGTAGAACAGGGC	CCTCAGGGCTGTAGAACAGGGC	not reported	not reported	not reported	1	1	1	1	CTCAGGG	5p	3.32897	3.57592	2.04029	3.46512	0.311537	0.604264	0.614654	0.619491	[W (N)] and [W (T)] and [B/AA (N)] and [B/AA (T)]
miR-1266-5p__mir-1266__0__-2__21M	hsa-mir-1266	MI0006403	hsa-miR-1266-5p	MIMAT0005920	0	-2	52277168	52277188	chr15	-	0	CCTCAGGGCTGTAGAACAGGG	CCTCAGGGCTGTAGAACAGGG	not reported	not reported	not reported	1	1	1	1	CTCAGGG	5p	2.84526	3.71738	2.20784	3.36796	0.371731	0.595485	0.555715	0.631673	[W (N)] and [W (T)] and [B/AA (N)] and [B/AA (T)]
miR-1266-5p__mir-1266__0__-6__17M	hsa-mir-1266	MI0006403	hsa-miR-1266-5p	MIMAT0005920	0	-6	52277172	52277188	chr15	-	0	CCTCAGGGCTGTAGAAC	CCTCAGGGCTGTAGAAC	not reported	not reported	not reported	0	1	0	1	CTCAGGG	5p	1.29181	2.10324	1.20709	2.30385	0.122178	0.427087	0.124328	0.371014	[W (T)] and [B/AA (T)]
miR-1266-5p__mir-1266__0__0__23M	hsa-mir-1266	MI0006403	hsa-miR-1266-5p	MIMAT0005920	0	0	52277166	52277188	chr15	-	0	CCTCAGGGCTGTAGAACAGGGCT	CCTCAGGGCTGTAGAACAGGGCT	not reported	not reported	not reported	1	1	1	1	CTCAGGG	5p	5.58779	6.74487	3.3245	6.7803	0.568255	0.75009	0.736833	0.753852	[W (N)] and [W (T)] and [B/AA (N)] and [B/AA (T)]
miR-1268b__mir-1268b__0__-2__18M	hsa-mir-1268b	MI0016748	hsa-miR-1268b	MIMAT0018925	0	-2	80098831	80098848	chr17	+	0	CGGGCGTGGTGGTGGGGG	CGGGCGTGGTGGTGGGGG	not reported	not reported	not reported	0	1	1	1	GGGCGTG	5p	2.2548	3.23483	1.44663	3.67554	0.182014	0.61985	0.441777	0.587782	[W (N)] and [W (T)] and [B/AA (T)]
miR-127-3p__mir-127__-1__-1__21MA	hsa-mir-127	MI0000472	hsa-miR-127-3p	MIMAT0000446	-1	-1	100883034	100883055	chr14	+	1	ATCGGATCCGTCTGAGCTTGGA	ATCGGATCCGTCTGAGCTTGGC	TCGA=22:C-A	not reported	not reported	1	1	1	1	TCGGATC	3p	2.67484	3.14443	2.5006	2.65259	0.443927	0.503583	0.530097	0.57775	[W (N)] and [W (T)] and [B/AA (N)] and [B/AA (T)]
miR-127-3p__mir-127__-1__-2__21M	hsa-mir-127	MI0000472	hsa-miR-127-3p	MIMAT0000446	-1	-2	100883034	100883054	chr14	+	0	ATCGGATCCGTCTGAGCTTGG	ATCGGATCCGTCTGAGCTTGG	not reported	not reported	not reported	0	1	1	1	TCGGATC	3p	2.10031	2.42671	1.72447	2.07412	0.239162	0.351487	0.390541	0.46632	[W (N)] and [W (T)] and [B/AA (T)]
miR-127-3p__mir-127__0__-1__13MC7M	hsa-mir-127	MI0000472	hsa-miR-127-3p	MIMAT0000446	0	-1	100883035	100883055	chr14	+	1	TCGGATCCGTCTGCGCTTGGC	TCGGATCCGTCTGAGCTTGGC	not reported	14:A-C	not reported	1	0	1	0	CGGATCC	3p	3.86781	1.34731	5.26851	1.33398	0.688105	0.156396	0.659799	0.146901	[W (N)] and [B/AA (N)]
miR-127-3p__mir-127__0__-1__20MA	hsa-mir-127	MI0000472	hsa-miR-127-3p	MIMAT0000446	0	-1	100883035	100883055	chr14	+	1	TCGGATCCGTCTGAGCTTGGA	TCGGATCCGTCTGAGCTTGGC	TCGA=21:C-A	not reported	not reported	1	1	1	1	CGGATCC	3p	26.4592	28.1486	17.3639	21.7779	0.846471	0.867789	0.896811	0.891258	[W (N)] and [W (T)] and [B/AA (N)] and [B/AA (T)]
miR-127-3p__mir-127__0__-1__21M	hsa-mir-127	MI0000472	hsa-miR-127-3p	MIMAT0000446	0	-1	100883035	100883055	chr14	+	0	TCGGATCCGTCTGAGCTTGGC	TCGGATCCGTCTGAGCTTGGC	not reported	not reported	not reported	1	1	1	1	CGGATCC	3p	131.869	93.051	104.416	78.3243	0.944285	0.93497	0.956826	0.941956	[W (N)] and [W (T)] and [B/AA (N)] and [B/AA (T)]
miR-127-3p__mir-127__0__-1__3MT17M	hsa-mir-127	MI0000472	hsa-miR-127-3p	MIMAT0000446	0	-1	100883035	100883055	chr14	+	1	TCGTATCCGTCTGAGCTTGGC	TCGGATCCGTCTGAGCTTGGC	COSV66017115,TCGA=4:G-T	not reported	not reported	0	1	0	1	CGTATCC	3p	1.17481	2.748	1	2.27297	0.000179147	0.417951	0.09244	0.526872	[W (T)] and [B/AA (T)]
miR-127-3p__mir-127__0__-2__13MC6M	hsa-mir-127	MI0000472	hsa-miR-127-3p	MIMAT0000446	0	-2	100883035	100883054	chr14	+	1	TCGGATCCGTCTGCGCTTGG	TCGGATCCGTCTGAGCTTGG	not reported	14:A-C	not reported	1	0	0	0	CGGATCC	3p	1.80517	1.1965	2.18148	1.15152	0.36349	0.0756001	0.284307	0.0834826	[B/AA (N)]
miR-127-3p__mir-127__0__-2__20M	hsa-mir-127	MI0000472	hsa-miR-127-3p	MIMAT0000446	0	-2	100883035	100883054	chr14	+	0	TCGGATCCGTCTGAGCTTGG	TCGGATCCGTCTGAGCTTGG	not reported	not reported	not reported	1	1	1	1	CGGATCC	3p	35.8752	40.4181	22.3116	29.9855	0.865998	0.892332	0.91383	0.910068	[W (N)] and [W (T)] and [B/AA (N)] and [B/AA (T)]
miR-127-3p__mir-127__0__-3__19M	hsa-mir-127	MI0000472	hsa-miR-127-3p	MIMAT0000446	0	-3	100883035	100883053	chr14	+	0	TCGGATCCGTCTGAGCTTG	TCGGATCCGTCTGAGCTTG	not reported	not reported	not reported	1	1	1	1	CGGATCC	3p	4.43911	5.34804	3.52606	4.22569	0.59029	0.657112	0.694375	0.713006	[W (N)] and [W (T)] and [B/AA (N)] and [B/AA (T)]
miR-127-3p__mir-127__0__-4__18M	hsa-mir-127	MI0000472	hsa-miR-127-3p	MIMAT0000446	0	-4	100883035	100883052	chr14	+	0	TCGGATCCGTCTGAGCTT	TCGGATCCGTCTGAGCTT	not reported	not reported	not reported	0	1	0	1	CGGATCC	3p	1.73684	2.28184	1.40533	2.03724	0.171265	0.337693	0.262451	0.425475	[W (T)] and [B/AA (T)]
miR-127-3p__mir-127__0__-6__16M	hsa-mir-127	MI0000472	hsa-miR-127-3p	MIMAT0000446	0	-6	100883035	100883050	chr14	+	0	TCGGATCCGTCTGAGC	TCGGATCCGTCTGAGC	not reported	not reported	not reported	0	1	0	1	CGGATCC	3p	1.99922	2.65205	1.4472	2.11137	0.182193	0.364386	0.351666	0.506987	[W (T)] and [B/AA (T)]
miR-127-3p__mir-127__0__0__13MC8M	hsa-mir-127	MI0000472	hsa-miR-127-3p	MIMAT0000446	0	0	100883035	100883056	chr14	+	1	TCGGATCCGTCTGCGCTTGGCT	TCGGATCCGTCTGAGCTTGGCT	not reported	14:A-C	not reported	1	0	1	0	CGGATCC	3p	2.64782	1.36183	3.94692	1.37847	0.620566	0.171802	0.525797	0.151917	[W (N)] and [B/AA (N)]
miR-127-3p__mir-127__0__0__22M	hsa-mir-127	MI0000472	hsa-miR-127-3p	MIMAT0000446	0	0	100883035	100883056	chr14	+	0	TCGGATCCGTCTGAGCTTGGCT	TCGGATCCGTCTGAGCTTGGCT	not reported	not reported	not reported	1	1	1	1	CGGATCC	3p	88.1578	122.087	62.8206	118.145	0.924579	0.948047	0.946077	0.950376	[W (N)] and [W (T)] and [B/AA (N)] and [B/AA (T)]
miR-127-3p__mir-127__0__0__3MT18M	hsa-mir-127	MI0000472	hsa-miR-127-3p	MIMAT0000446	0	0	100883035	100883056	chr14	+	1	TCGTATCCGTCTGAGCTTGGCT	TCGGATCCGTCTGAGCTTGGCT	COSV66017115,TCGA=4:G-T	not reported	not reported	0	1	0	1	CGTATCC	3p	1.24006	3.42226	1	2.90989	0.000179147	0.543891	0.109459	0.606234	[W (T)] and [B/AA (T)]
miR-127-5p__mir-127__+1__-1__20M	hsa-mir-127	MI0000472	hsa-miR-127-5p	MIMAT0004604	1	-1	100883002	100883021	chr14	+	0	TGAAGCTCAGAGGGCTCTGA	TGAAGCTCAGAGGGCTCTGA	not reported	not reported	not reported	1	0	0	0	GAAGCTC	5p	1.80035	1.77963	2.27935	1.60957	0.391795	0.230921	0.28359	0.272483	[B/AA (N)]
miR-127-5p__mir-127__0__-1__21M	hsa-mir-127	MI0000472	hsa-miR-127-5p	MIMAT0004604	0	-1	100883001	100883021	chr14	+	0	CTGAAGCTCAGAGGGCTCTGA	CTGAAGCTCAGAGGGCTCTGA	not reported	not reported	not reported	1	1	1	1	TGAAGCT	5p	12.2081	51.4638	12.8943	43.4373	0.817449	0.911501	0.843425	0.920817	[W (N)] and [W (T)] and [B/AA (N)] and [B/AA (T)]
miR-127-5p__mir-127__0__-2__20M	hsa-mir-127	MI0000472	hsa-miR-127-5p	MIMAT0004604	0	-2	100883001	100883020	chr14	+	0	CTGAAGCTCAGAGGGCTCTG	CTGAAGCTCAGAGGGCTCTG	not reported	not reported	not reported	0	1	0	1	TGAAGCT	5p	1.2535	4.80993	1.26373	3.73291	0.135614	0.623612	0.113042	0.693658	[W (T)] and [B/AA (T)]
miR-127-5p__mir-127__0__+1__23M	hsa-mir-127	MI0000472	hsa-miR-127-5p	MIMAT0004604	0	1	100883001	100883023	chr14	+	0	CTGAAGCTCAGAGGGCTCTGATT	CTGAAGCTCAGAGGGCTCTGATT	not reported	not reported	not reported	0	1	0	1	TGAAGCT	5p	1.16541	5.84202	1.1493	5.66206	0.106413	0.717843	0.0906485	0.729667	[W (T)] and [B/AA (T)]
miR-127-5p__mir-127__0__0__22M	hsa-mir-127	MI0000472	hsa-miR-127-5p	MIMAT0004604	0	0	100883001	100883022	chr14	+	0	CTGAAGCTCAGAGGGCTCTGAT	CTGAAGCTCAGAGGGCTCTGAT	not reported	not reported	not reported	1	1	1	1	TGAAGCT	5p	2.73495	25.0395	2.59474	23.8455	0.46435	0.875493	0.540487	0.882479	[W (N)] and [W (T)] and [B/AA (N)] and [B/AA (T)]
miR-1275__mir-1275__0__-1__16M	hsa-mir-1275	MI0006415	hsa-miR-1275	MIMAT0005929	0	-1	34000019	34000034	chr6	-	0	GTGGGGGAGAGGCTGT	GTGGGGGAGAGGCTGT	not reported	not reported	not reported	0	1	1	1	TGGGGGA	5p	2.83079	3.14528	1.84828	3.13556	0.265138	0.572555	0.551953	0.577929	[W (N)] and [W (T)] and [B/AA (T)]
miR-1275__mir-1275__0__0__17M	hsa-mir-1275	MI0006415	hsa-miR-1275	MIMAT0005929	0	0	34000018	34000034	chr6	-	0	GTGGGGGAGAGGCTGTC	GTGGGGGAGAGGCTGTC	not reported	not reported	not reported	0	1	0	1	TGGGGGA	5p	1.9797	2.02509	1.27654	2.24033	0.137764	0.406306	0.346113	0.346292	[W (T)] and [B/AA (T)]
miR-128-1-5p__mir-128-1__0__-2__21M	hsa-mir-128-1	MI0000447	hsa-miR-128-1-5p	MIMAT0026477	0	-2	135665411	135665431	chr2	+	0	CGGGGCCGTAGCACTGTCTGA	CGGGGCCGTAGCACTGTCTGA	not reported	not reported	not reported	1	1	1	1	GGGGCCG	5p	3.01773	2.89145	2.3305	2.93615	0.403081	0.547832	0.578108	0.548728	[W (N)] and [W (T)] and [B/AA (N)] and [B/AA (T)]
miR-128-3p__mir-128-1__0__-1__20M	hsa-mir-128-1	MI0000447	hsa-miR-128-3p	MIMAT0000424	0	-1	135665446	135665465	chr2	+	0	TCACAGTGAACCGGTCTCTT	TCACAGTGAACCGGTCTCTT	not reported	not reported	not reported	1	1	1	1	CACAGTG	3p	12.793	21.2572	14.4137	23.6051	0.829452	0.874776	0.848083	0.870477	[W (N)] and [W (T)] and [B/AA (N)] and [B/AA (T)]
miR-128-3p__mir-128-1__0__-2__19M	hsa-mir-128-1	MI0000447	hsa-miR-128-3p	MIMAT0000424	0	-2	135665446	135665464	chr2	+	0	TCACAGTGAACCGGTCTCT	TCACAGTGAACCGGTCTCT	not reported	not reported	not reported	1	1	1	1	CACAGTG	3p	9.44879	12.4031	12.5344	13.4251	0.813866	0.831422	0.815837	0.826406	[W (N)] and [W (T)] and [B/AA (N)] and [B/AA (T)]
miR-128-3p__mir-128-1__0__+1__22M	hsa-mir-128-1	MI0000447	hsa-miR-128-3p	MIMAT0000424	0	1	135665446	135665467	chr2	+	0	TCACAGTGAACCGGTCTCTTTT	TCACAGTGAACCGGTCTCTTTT	not reported	not reported	not reported	1	1	1	1	CACAGTG	3p	5.82633	10.1787	7.25437	13.7347	0.747582	0.833214	0.745969	0.807775	[W (N)] and [W (T)] and [B/AA (N)] and [B/AA (T)]
miR-128-3p__mir-128-1__0__0__21M	hsa-mir-128-1	MI0000447	hsa-miR-128-3p	MIMAT0000424	0	0	135665446	135665466	chr2	+	0	TCACAGTGAACCGGTCTCTTT	TCACAGTGAACCGGTCTCTTT	not reported	not reported	not reported	1	1	1	1	CACAGTG	3p	36.4333	70.3026	47.7292	89.0516	0.91186	0.939627	0.914547	0.933536	[W (N)] and [W (T)] and [B/AA (N)] and [B/AA (T)]
miR-128-3p__mir-128-1__0__0__2MC18M	hsa-mir-128-1	MI0000447	hsa-miR-128-3p	MIMAT0000424	0	0	135665446	135665466	chr2	+	1	TCCCAGTGAACCGGTCTCTTT	TCACAGTGAACCGGTCTCTTT	not reported	3:A-C	not reported	0	1	0	1	CCCAGTG	3p	1	2.36452	1	3.05563	0.000179147	0.563418	0.000179147	0.44948	[W (T)] and [B/AA (T)]
miR-1285-5p__mir-1285-1__+1__-1__19M	hsa-mir-1285-1	MI0006346	hsa-miR-1285-5p	MIMAT0022719	1	-1	92204068	92204086	chr7	-	0	ATCTCACTTTGTTGCCCAG	ATCTCACTTTGTTGCCCAG	not reported	not reported	not reported	1	1	0	1	TCTCACT	5p	1.62487	2.68806	2.16924	2.65596	0.360086	0.50412	0.226442	0.515586	[W (T)] and [B/AA (N)] and [B/AA (T)]
miR-1287-3p__mir-1287__0__-1__21M	hsa-mir-1287	MI0006349	hsa-miR-1287-3p	MIMAT0026738	0	-1	98395233	98395253	chr10	-	0	CTCTAGCCACAGATGCAGTGA	CTCTAGCCACAGATGCAGTGA	not reported	not reported	not reported	0	1	0	1	TCTAGCC	3p	1.24951	2.95252	1.11921	2.8864	0.0965604	0.539233	0.111967	0.555357	[W (T)] and [B/AA (T)]
miR-1287-3p__mir-1287__0__0__22M	hsa-mir-1287	MI0006349	hsa-miR-1287-3p	MIMAT0026738	0	0	98395232	98395253	chr10	-	0	CTCTAGCCACAGATGCAGTGAT	CTCTAGCCACAGATGCAGTGAT	not reported	not reported	not reported	0	1	0	1	TCTAGCC	3p	1.26776	4.74127	1.10589	4.91606	0.0913651	0.685776	0.118416	0.689359	[W (T)] and [B/AA (T)]
miR-1287-5p__mir-1287__0__-1__21M	hsa-mir-1287	MI0006349	hsa-miR-1287-5p	MIMAT0005878	0	-1	98395272	98395292	chr10	-	0	TGCTGGATCAGTGGTTCGAGT	TGCTGGATCAGTGGTTCGAGT	not reported	not reported	not reported	1	1	1	1	GCTGGAT	5p	11.2408	18.6491	12.1344	21.4733	0.810641	0.866714	0.835364	0.85919	[W (N)] and [W (T)] and [B/AA (N)] and [B/AA (T)]
miR-1287-5p__mir-1287__0__-2__20M	hsa-mir-1287	MI0006349	hsa-miR-1287-5p	MIMAT0005878	0	-2	98395273	98395292	chr10	-	0	TGCTGGATCAGTGGTTCGAG	TGCTGGATCAGTGGTTCGAG	not reported	not reported	not reported	1	1	1	1	GCTGGAT	5p	8.74385	16.321	10.3851	16.5463	0.795235	0.8488	0.804729	0.850054	[W (N)] and [W (T)] and [B/AA (N)] and [B/AA (T)]
miR-1287-5p__mir-1287__0__-3__19M	hsa-mir-1287	MI0006349	hsa-miR-1287-5p	MIMAT0005878	0	-3	98395274	98395292	chr10	-	0	TGCTGGATCAGTGGTTCGA	TGCTGGATCAGTGGTTCGA	not reported	not reported	not reported	1	1	0	1	GCTGGAT	5p	1.94079	2.77284	2.22511	2.63545	0.376747	0.501254	0.332856	0.530634	[W (T)] and [B/AA (N)] and [B/AA (T)]
miR-1287-5p__mir-1287__0__-4__18M	hsa-mir-1287	MI0006349	hsa-miR-1287-5p	MIMAT0005878	0	-4	98395275	98395292	chr10	-	0	TGCTGGATCAGTGGTTCG	TGCTGGATCAGTGGTTCG	not reported	not reported	not reported	0	1	0	1	GCTGGAT	5p	1.40946	2.56287	1.59391	3.06902	0.214439	0.565389	0.159441	0.4957	[W (T)] and [B/AA (T)]
miR-1287-5p__mir-1287__0__0__22M	hsa-mir-1287	MI0006349	hsa-miR-1287-5p	MIMAT0005878	0	0	98395271	98395292	chr10	-	0	TGCTGGATCAGTGGTTCGAGTC	TGCTGGATCAGTGGTTCGAGTC	not reported	not reported	not reported	1	1	1	1	GCTGGAT	5p	3.15933	4.61215	4.2799	5.63278	0.641168	0.71641	0.595127	0.68273	[W (N)] and [W (T)] and [B/AA (N)] and [B/AA (T)]
miR-129-5p__mir-129-1__0__-1__20M	hsa-mir-129-1	MI0000252	hsa-miR-129-5p	MIMAT0000242	0	-1	128207876	128207895	chr7	+	0	CTTTTTGCGGTCTGGGCTTG	CTTTTTGCGGTCTGGGCTTG	not reported	not reported	not reported	0	1	0	0	TTTTTGC	5p	1.31685	1.86885	1.2878	2.00742	0.140272	0.328198	0.132927	0.293981	[B/AA (T)]
miR-129-5p__mir-129-1__0__0__21M	hsa-mir-129-1	MI0000252	hsa-miR-129-5p	MIMAT0000242	0	0	128207876	128207896	chr7	+	0	CTTTTTGCGGTCTGGGCTTGC	CTTTTTGCGGTCTGGGCTTGC	not reported	not reported	not reported	1	1	1	1	TTTTTGC	5p	3.16147	3.0292	2.62685	3.45052	0.472411	0.602651	0.595485	0.56521	[W (N)] and [W (T)] and [B/AA (N)] and [B/AA (T)]
miR-1296-5p__mir-1296__0__0__22M	hsa-mir-1296	MI0003780	hsa-miR-1296-5p	MIMAT0005794	0	0	63373012	63373033	chr10	-	0	TTAGGGCCCTGGCTCCATCTCC	TTAGGGCCCTGGCTCCATCTCC	not reported	not reported	not reported	0	1	1	1	TAGGGCC	5p	3.44707	2.42151	1.82925	2.55911	0.26048	0.486027	0.626299	0.463991	[W (N)] and [W (T)] and [B/AA (T)]
miR-1299__mir-1299__0__-1__20MA	hsa-mir-1299	MI0006359	hsa-miR-1299	MIMAT0005887	0	-1	40929011	40929031	chr9	-	1	TTCTGGAATTCTGTGTGAGGA	TTCTGGAATTCTGTGTGAGGG	rs796108267=21:G-A	not reported	not reported	1	1	0	0	TCTGGAA	3p	1.46603	1.52635	6.12272	3.12013	0.717664	0.571301	0.173415	0.20369	[B/AA (N)] and [B/AA (T)]
miR-1299__mir-1299__0__-1__21M	hsa-mir-1299	MI0006359	hsa-miR-1299	MIMAT0005887	0	-1	40929011	40929031	chr9	-	0	TTCTGGAATTCTGTGTGAGGG	TTCTGGAATTCTGTGTGAGGG	not reported	not reported	not reported	1	1	1	1	TCTGGAA	3p	2.36332	2.33547	7.7545	3.24141	0.756181	0.583303	0.466858	0.440344	[W (N)] and [W (T)] and [B/AA (N)] and [B/AA (T)]
miR-1299__mir-1299__0__-2__19MA	hsa-mir-1299	MI0006359	hsa-miR-1299	MIMAT0005887	0	-2	40929012	40929031	chr9	-	1	TTCTGGAATTCTGTGTGAGA	TTCTGGAATTCTGTGTGAGG	rs1009712608=20:G-A	not reported	not reported	1	0	0	0	TCTGGAA	3p	1.20953	1.15362	2.62321	1.29672	0.471157	0.141885	0.101935	0.0612684	[B/AA (N)]
miR-1299__mir-1299__0__-2__20M	hsa-mir-1299	MI0006359	hsa-miR-1299	MIMAT0005887	0	-2	40929012	40929031	chr9	-	0	TTCTGGAATTCTGTGTGAGG	TTCTGGAATTCTGTGTGAGG	not reported	not reported	not reported	1	1	1	1	TCTGGAA	3p	3.15254	3.27646	20.8652	6.27498	0.860265	0.738624	0.594052	0.592619	[W (N)] and [W (T)] and [B/AA (N)] and [B/AA (T)]
miR-1299__mir-1299__0__-3__19M	hsa-mir-1299	MI0006359	hsa-miR-1299	MIMAT0005887	0	-3	40929013	40929031	chr9	-	0	TTCTGGAATTCTGTGTGAG	TTCTGGAATTCTGTGTGAG	not reported	not reported	not reported	1	1	0	0	TCTGGAA	3p	1.54064	1.66623	4.62473	2.53186	0.660874	0.480473	0.196525	0.242745	[B/AA (N)] and [B/AA (T)]
miR-1299__mir-1299__0__-5__17M	hsa-mir-1299	MI0006359	hsa-miR-1299	MIMAT0005887	0	-5	40929015	40929031	chr9	-	0	TTCTGGAATTCTGTGTG	TTCTGGAATTCTGTGTG	not reported	not reported	not reported	1	1	0	0	TCTGGAA	3p	1.39357	1.94578	4.14009	3.79599	0.632569	0.629165	0.154246	0.317628	[B/AA (N)] and [B/AA (T)]
miR-1299__mir-1299__0__-6__16M	hsa-mir-1299	MI0006359	hsa-miR-1299	MIMAT0005887	0	-6	40929016	40929031	chr9	-	0	TTCTGGAATTCTGTGT	TTCTGGAATTCTGTGT	not reported	not reported	not reported	1	0	0	0	TCTGGAA	3p	1.22381	1.25257	2.45895	1.58365	0.434432	0.225546	0.106413	0.107847	[B/AA (N)]
miR-1299__mir-1299__0__+1__22MA	hsa-mir-1299	MI0006359	hsa-miR-1299	MIMAT0005887	0	1	40929009	40929031	chr9	-	1	TTCTGGAATTCTGTGTGAGGGAA	TTCTGGAATTCTGTGTGAGGGAC	rs1587561396=23:C-A	not reported	not reported	1	0	0	0	TCTGGAA	3p	1.43931	1.44369	3.25258	1.89467	0.560373	0.300967	0.166965	0.176102	[B/AA (N)]
miR-1299__mir-1299__0__+1__22MT	hsa-mir-1299	MI0006359	hsa-miR-1299	MIMAT0005887	0	1	40929009	40929031	chr9	-	1	TTCTGGAATTCTGTGTGAGGGAT	TTCTGGAATTCTGTGTGAGGGAC	rs1587561396=23:C-T	not reported	not reported	1	1	0	0	TCTGGAA	3p	1.29475	1.53433	3.21164	2.27445	0.55464	0.418667	0.125224	0.206019	[B/AA (N)] and [B/AA (T)]
miR-1299__mir-1299__0__0__20MA1M	hsa-mir-1299	MI0006359	hsa-miR-1299	MIMAT0005887	0	0	40929010	40929031	chr9	-	1	TTCTGGAATTCTGTGTGAGGAA	TTCTGGAATTCTGTGTGAGGGA	rs796108267=21:G-A	not reported	not reported	1	1	0	0	TCTGGAA	3p	1.39187	1.39392	4.88516	2.54844	0.673056	0.483518	0.153708	0.162487	[B/AA (N)] and [B/AA (T)]
miR-1299__mir-1299__0__0__22M	hsa-mir-1299	MI0006359	hsa-miR-1299	MIMAT0005887	0	0	40929010	40929031	chr9	-	0	TTCTGGAATTCTGTGTGAGGGA	TTCTGGAATTCTGTGTGAGGGA	not reported	not reported	not reported	1	1	1	1	TCTGGAA	3p	4.37724	4.51382	24.2409	8.79131	0.872805	0.782694	0.691867	0.677535	[W (N)] and [W (T)] and [B/AA (N)] and [B/AA (T)]
miR-1301-3p__mir-1301__0__-2__22M	hsa-mir-1301	MI0003815	hsa-miR-1301-3p	MIMAT0005797	0	-2	25328653	25328674	chr2	-	0	TTGCAGCTGCCTGGGAGTGACT	TTGCAGCTGCCTGGGAGTGACT	not reported	not reported	not reported	0	1	0	1	TGCAGCT	3p	1.91717	3.43969	1.51154	4.38216	0.19545	0.664995	0.323182	0.608205	[W (T)] and [B/AA (T)]
miR-1301-3p__mir-1301__0__-3__21M	hsa-mir-1301	MI0003815	hsa-miR-1301-3p	MIMAT0005797	0	-3	25328654	25328674	chr2	-	0	TTGCAGCTGCCTGGGAGTGAC	TTGCAGCTGCCTGGGAGTGAC	not reported	not reported	not reported	0	1	1	1	TGCAGCT	3p	2.19466	3.21155	1.58925	3.79208	0.213723	0.628449	0.426191	0.585453	[W (N)] and [W (T)] and [B/AA (T)]
miR-1301-3p__mir-1301__0__-4__20M	hsa-mir-1301	MI0003815	hsa-miR-1301-3p	MIMAT0005797	0	-4	25328655	25328674	chr2	-	0	TTGCAGCTGCCTGGGAGTGA	TTGCAGCTGCCTGGGAGTGA	not reported	not reported	not reported	0	1	0	1	TGCAGCT	3p	1.60183	2.32324	1.1933	2.6505	0.118954	0.503404	0.216768	0.436761	[W (T)] and [B/AA (T)]
miR-1301-3p__mir-1301__0__-7__17M	hsa-mir-1301	MI0003815	hsa-miR-1301-3p	MIMAT0005797	0	-7	25328658	25328674	chr2	-	0	TTGCAGCTGCCTGGGAG	TTGCAGCTGCCTGGGAG	not reported	not reported	not reported	0	1	0	0	TGCAGCT	3p	1.29424	1.86677	1.1727	2.26759	0.112146	0.416338	0.125045	0.293264	[B/AA (T)]
miR-1306-5p__mir-1306__0__-1__21M	hsa-mir-1306	MI0006443	hsa-miR-1306-5p	MIMAT0022726	0	-1	20086072	20086092	chr22	+	0	CCACCTCCCCTGCAAACGTCC	CCACCTCCCCTGCAAACGTCC	not reported	not reported	not reported	0	1	1	1	CACCTCC	5p	2.84296	2.89908	1.65279	3.16733	0.225367	0.576317	0.554998	0.549982	[W (N)] and [W (T)] and [B/AA (T)]
miR-1306-5p__mir-1306__0__-2__20M	hsa-mir-1306	MI0006443	hsa-miR-1306-5p	MIMAT0022726	0	-2	20086072	20086091	chr22	+	0	CCACCTCCCCTGCAAACGTC	CCACCTCCCCTGCAAACGTC	not reported	not reported	not reported	0	1	1	1	CACCTCC	5p	2.54748	2.55533	1.63232	2.65663	0.221247	0.5043	0.506987	0.494626	[W (N)] and [W (T)] and [B/AA (T)]
miR-1306-5p__mir-1306__0__0__22M	hsa-mir-1306	MI0006443	hsa-miR-1306-5p	MIMAT0022726	0	0	20086072	20086093	chr22	+	0	CCACCTCCCCTGCAAACGTCCA	CCACCTCCCCTGCAAACGTCCA	not reported	not reported	not reported	0	1	1	1	CACCTCC	5p	2.44863	2.84693	1.40349	2.99141	0.170548	0.55464	0.48746	0.5421	[W (N)] and [W (T)] and [B/AA (T)]
miR-1307-3p__mir-1307__+1__-1__20M	hsa-mir-1307	MI0006444	hsa-miR-1307-3p	MIMAT0005951	1	-1	103394302	103394321	chr10	-	0	CTCGGCGTGGCGTCGGTCGT	CTCGGCGTGGCGTCGGTCGT	not reported	not reported	not reported	1	1	1	1	TCGGCGT	3p	3.96222	2.79749	2.55256	2.88699	0.456646	0.539412	0.666249	0.534396	[W (N)] and [W (T)] and [B/AA (N)] and [B/AA (T)]
miR-1307-3p__mir-1307__+1__-2__19M	hsa-mir-1307	MI0006444	hsa-miR-1307-3p	MIMAT0005951	1	-2	103394303	103394321	chr10	-	0	CTCGGCGTGGCGTCGGTCG	CTCGGCGTGGCGTCGGTCG	not reported	not reported	not reported	1	1	1	1	TCGGCGT	3p	3.74109	8.26667	2.19396	8.85442	0.367431	0.784128	0.651021	0.779291	[W (N)] and [W (T)] and [B/AA (N)] and [B/AA (T)]
miR-1307-3p__mir-1307__+1__-3__18M	hsa-mir-1307	MI0006444	hsa-miR-1307-3p	MIMAT0005951	1	-3	103394304	103394321	chr10	-	0	CTCGGCGTGGCGTCGGTC	CTCGGCGTGGCGTCGGTC	not reported	not reported	not reported	0	1	0	1	TCGGCGT	3p	1.58229	2.06021	1.09421	2.04647	0.0884987	0.340201	0.210677	0.356324	[W (T)] and [B/AA (T)]
miR-1307-3p__mir-1307__+1__-4__17M	hsa-mir-1307	MI0006444	hsa-miR-1307-3p	MIMAT0005951	1	-4	103394305	103394321	chr10	-	0	CTCGGCGTGGCGTCGGT	CTCGGCGTGGCGTCGGT	not reported	not reported	not reported	0	1	0	1	TCGGCGT	3p	1.48154	2.06825	1.46458	2.44881	0.186134	0.459692	0.17861	0.359549	[W (T)] and [B/AA (T)]
miR-1307-3p__mir-1307__+1__-5__16M	hsa-mir-1307	MI0006444	hsa-miR-1307-3p	MIMAT0005951	1	-5	103394306	103394321	chr10	-	0	CTCGGCGTGGCGTCGG	CTCGGCGTGGCGTCGG	not reported	not reported	not reported	1	1	1	1	TCGGCGT	3p	4.66682	8.37608	4.39024	9.52951	0.648155	0.791652	0.704228	0.781799	[W (N)] and [W (T)] and [B/AA (N)] and [B/AA (T)]
miR-1307-3p__mir-1307__+1__+1__22M	hsa-mir-1307	MI0006444	hsa-miR-1307-3p	MIMAT0005951	1	1	103394300	103394321	chr10	-	0	CTCGGCGTGGCGTCGGTCGTGG	CTCGGCGTGGCGTCGGTCGTGG	not reported	not reported	not reported	1	1	1	1	TCGGCGT	3p	105.717	202.122	86.6343	250.57	0.936761	0.967395	0.94966	0.9622	[W (N)] and [W (T)] and [B/AA (N)] and [B/AA (T)]
miR-1307-3p__mir-1307__+1__+1__3MT18M	hsa-mir-1307	MI0006444	hsa-miR-1307-3p	MIMAT0005951	1	1	103394300	103394321	chr10	-	1	CTCTGCGTGGCGTCGGTCGTGG	CTCGGCGTGGCGTCGGTCGTGG	rs953336177=4:G-T	not reported	not reported	0	1	0	1	TCTGCGT	3p	1.34755	3.80262	1.03577	4.04999	0.063239	0.645826	0.14296	0.636331	[W (T)] and [B/AA (T)]
miR-1307-3p__mir-1307__+1__+2__23M	hsa-mir-1307	MI0006444	hsa-miR-1307-3p	MIMAT0005951	1	2	103394299	103394321	chr10	-	0	CTCGGCGTGGCGTCGGTCGTGGT	CTCGGCGTGGCGTCGGTCGTGGT	not reported	not reported	not reported	1	1	1	1	TCGGCGT	3p	12.5424	20.8107	9.39298	27.8198	0.782336	0.888033	0.846471	0.868327	[W (N)] and [W (T)] and [B/AA (N)] and [B/AA (T)]
miR-1307-3p__mir-1307__+1__0__21M	hsa-mir-1307	MI0006444	hsa-miR-1307-3p	MIMAT0005951	1	0	103394301	103394321	chr10	-	0	CTCGGCGTGGCGTCGGTCGTG	CTCGGCGTGGCGTCGGTCGTG	not reported	not reported	not reported	1	1	1	1	TCGGCGT	3p	25.3959	41.0291	18.9123	51.2853	0.851845	0.919921	0.894303	0.910785	[W (N)] and [W (T)] and [B/AA (N)] and [B/AA (T)]
miR-1307-3p__mir-1307__0__-1__21M	hsa-mir-1307	MI0006444	hsa-miR-1307-3p	MIMAT0005951	0	-1	103394302	103394322	chr10	-	0	ACTCGGCGTGGCGTCGGTCGT	ACTCGGCGTGGCGTCGGTCGT	not reported	not reported	not reported	1	1	1	1	CTCGGCG	3p	7.25279	14.953	4.90513	17.4446	0.674131	0.85292	0.778216	0.84235	[W (N)] and [W (T)] and [B/AA (N)] and [B/AA (T)]
miR-1307-3p__mir-1307__0__-2__20M	hsa-mir-1307	MI0006444	hsa-miR-1307-3p	MIMAT0005951	0	-2	103394303	103394322	chr10	-	0	ACTCGGCGTGGCGTCGGTCG	ACTCGGCGTGGCGTCGGTCG	not reported	not reported	not reported	1	1	1	1	CTCGGCG	3p	3.51603	8.13655	2.87579	9.9042	0.513078	0.797205	0.632569	0.777141	[W (N)] and [W (T)] and [B/AA (N)] and [B/AA (T)]
miR-1307-3p__mir-1307__0__-3__19M	hsa-mir-1307	MI0006444	hsa-miR-1307-3p	MIMAT0005951	0	-3	103394304	103394322	chr10	-	0	ACTCGGCGTGGCGTCGGTC	ACTCGGCGTGGCGTCGGTC	not reported	not reported	not reported	0	1	0	1	CTCGGCG	3p	1.33136	2.3943	1.18722	2.45863	0.117341	0.462021	0.137585	0.456467	[W (T)] and [B/AA (T)]
miR-1307-3p__mir-1307__0__-4__18M	hsa-mir-1307	MI0006444	hsa-miR-1307-3p	MIMAT0005951	0	-4	103394305	103394322	chr10	-	0	ACTCGGCGTGGCGTCGGT	ACTCGGCGTGGCGTCGGT	not reported	not reported	not reported	0	1	1	1	CTCGGCG	3p	2.03693	3.69441	1.88061	4.41247	0.27105	0.66607	0.36546	0.630598	[W (N)] and [W (T)] and [B/AA (T)]
miR-1307-3p__mir-1307__0__-5__17M	hsa-mir-1307	MI0006444	hsa-miR-1307-3p	MIMAT0005951	0	-5	103394306	103394322	chr10	-	0	ACTCGGCGTGGCGTCGG	ACTCGGCGTGGCGTCGG	not reported	not reported	not reported	1	1	1	1	CTCGGCG	3p	7.31141	19.5762	6.19593	24.0714	0.72053	0.876388	0.779649	0.863311	[W (N)] and [W (T)] and [B/AA (N)] and [B/AA (T)]
miR-1307-3p__mir-1307__0__-6__16M	hsa-mir-1307	MI0006444	hsa-miR-1307-3p	MIMAT0005951	0	-6	103394307	103394322	chr10	-	0	ACTCGGCGTGGCGTCG	ACTCGGCGTGGCGTCG	not reported	not reported	not reported	1	1	1	1	CTCGGCG	3p	6.48464	11.4734	4.04869	11.9023	0.625403	0.816732	0.76263	0.819778	[W (N)] and [W (T)] and [B/AA (N)] and [B/AA (T)]
miR-1307-3p__mir-1307__0__+1__1MAG20M	hsa-mir-1307	MI0006444	hsa-miR-1307-3p	MIMAT0005951	0	1	103394300	103394322	chr10	-	2	AAGCGGCGTGGCGTCGGTCGTGG	ACTCGGCGTGGCGTCGGTCGTGG	not reported	2:C-A;3:T-G	not reported	1	0	0	0	AGCGGCG	3p	1.91066	1.36697	2.80511	1.2594	0.50215	0.12809	0.320674	0.152633	[B/AA (N)]
miR-1307-3p__mir-1307__0__+1__23M	hsa-mir-1307	MI0006444	hsa-miR-1307-3p	MIMAT0005951	0	1	103394300	103394322	chr10	-	0	ACTCGGCGTGGCGTCGGTCGTGG	ACTCGGCGTGGCGTCGGTCGTGG	not reported	not reported	not reported	1	1	1	1	CTCGGCG	3p	133.972	349.933	97.6213	421.139	0.941598	0.975815	0.957721	0.974203	[W (N)] and [W (T)] and [B/AA (N)] and [B/AA (T)]
miR-1307-3p__mir-1307__0__+2__24M	hsa-mir-1307	MI0006444	hsa-miR-1307-3p	MIMAT0005951	0	2	103394299	103394322	chr10	-	0	ACTCGGCGTGGCGTCGGTCGTGGT	ACTCGGCGTGGCGTCGGTCGTGGT	not reported	not reported	not reported	1	1	1	1	CTCGGCG	3p	6.63209	13.8873	4.5005	17.1523	0.652992	0.851129	0.765675	0.835543	[W (N)] and [W (T)] and [B/AA (N)] and [B/AA (T)]
miR-1307-3p__mir-1307__0__0__22M	hsa-mir-1307	MI0006444	hsa-miR-1307-3p	MIMAT0005951	0	0	103394301	103394322	chr10	-	0	ACTCGGCGTGGCGTCGGTCGTG	ACTCGGCGTGGCGTCGGTCGTG	not reported	not reported	not reported	1	1	1	1	CTCGGCG	3p	17.8136	59.676	13.0552	79.0135	0.818703	0.935149	0.87388	0.927804	[W (N)] and [W (T)] and [B/AA (N)] and [B/AA (T)]
miR-1307-5p__mir-1307__0__-1__20M	hsa-mir-1307	MI0006444	hsa-miR-1307-5p	MIMAT0022727	0	-1	103394342	103394361	chr10	-	0	TCGACCGGACCTCGACCGGC	TCGACCGGACCTCGACCGGC	not reported	not reported	not reported	1	1	1	1	CGACCGG	5p	8.45872	46.9147	10.8249	60.8136	0.799534	0.92655	0.800967	0.918667	[W (N)] and [W (T)] and [B/AA (N)] and [B/AA (T)]
miR-1307-5p__mir-1307__0__-2__19M	hsa-mir-1307	MI0006444	hsa-miR-1307-5p	MIMAT0022727	0	-2	103394343	103394361	chr10	-	0	TCGACCGGACCTCGACCGG	TCGACCGGACCTCGACCGG	not reported	not reported	not reported	1	1	1	1	CGACCGG	5p	2.06395	7.86768	2.77627	9.30154	0.496238	0.789681	0.376568	0.772841	[W (N)] and [W (T)] and [B/AA (N)] and [B/AA (T)]
miR-1307-5p__mir-1307__0__-3__18M	hsa-mir-1307	MI0006444	hsa-miR-1307-5p	MIMAT0022727	0	-3	103394344	103394361	chr10	-	0	TCGACCGGACCTCGACCG	TCGACCGGACCTCGACCG	not reported	not reported	not reported	0	1	0	1	CGACCGG	5p	1.36976	2.83726	1.32071	2.97437	0.150305	0.552132	0.147976	0.540487	[W (T)] and [B/AA (T)]
miR-1307-5p__mir-1307__0__-4__17M	hsa-mir-1307	MI0006444	hsa-miR-1307-5p	MIMAT0022727	0	-4	103394345	103394361	chr10	-	0	TCGACCGGACCTCGACC	TCGACCGGACCTCGACC	not reported	not reported	not reported	0	1	0	1	CGACCGG	5p	1.16291	2.53775	1.24129	2.86896	0.130777	0.537083	0.0899319	0.491938	[W (T)] and [B/AA (T)]
miR-1307-5p__mir-1307__0__-5__16M	hsa-mir-1307	MI0006444	hsa-miR-1307-5p	MIMAT0022727	0	-5	103394346	103394361	chr10	-	0	TCGACCGGACCTCGAC	TCGACCGGACCTCGAC	not reported	not reported	not reported	0	1	0	1	CGACCGG	5p	1.20848	2.49515	1.22875	2.78471	0.127374	0.525439	0.101397	0.482444	[W (T)] and [B/AA (T)]
miR-1307-5p__mir-1307__0__+1__21MT	hsa-mir-1307	MI0006444	hsa-miR-1307-5p	MIMAT0022727	0	1	103394340	103394361	chr10	-	1	TCGACCGGACCTCGACCGGCTT	TCGACCGGACCTCGACCGGCTC	rs576440491=22:C-T	not reported	not reported	0	1	0	0	CGACCGG	5p	1.10737	1.81059	1.08102	2.15819	0.0845575	0.37818	0.074167	0.280007	[B/AA (T)]
miR-1307-5p__mir-1307__0__+1__22M	hsa-mir-1307	MI0006444	hsa-miR-1307-5p	MIMAT0022727	0	1	103394340	103394361	chr10	-	0	TCGACCGGACCTCGACCGGCTC	TCGACCGGACCTCGACCGGCTC	not reported	not reported	not reported	1	1	1	1	CGACCGG	5p	3.80422	23.3892	6.06837	30.7178	0.716052	0.893945	0.654962	0.876209	[W (N)] and [W (T)] and [B/AA (N)] and [B/AA (T)]
miR-1307-5p__mir-1307__0__+2__22MA	hsa-mir-1307	MI0006444	hsa-miR-1307-5p	MIMAT0022727	0	2	103394339	103394361	chr10	-	1	TCGACCGGACCTCGACCGGCTCA	TCGACCGGACCTCGACCGGCTCG	rs772698535=23:G-A	not reported	not reported	0	1	0	1	CGACCGG	5p	1.60265	5.26291	1.95974	6.23539	0.285023	0.737549	0.217306	0.708886	[W (T)] and [B/AA (T)]
miR-1307-5p__mir-1307__0__+2__22MT	hsa-mir-1307	MI0006444	hsa-miR-1307-5p	MIMAT0022727	0	2	103394339	103394361	chr10	-	1	TCGACCGGACCTCGACCGGCTCT	TCGACCGGACCTCGACCGGCTCG	rs772698535=23:G-T	not reported	not reported	0	1	0	1	CGACCGG	5p	1.28019	2.69955	1.42875	3.26897	0.177535	0.586528	0.121999	0.518452	[W (T)] and [B/AA (T)]
miR-1307-5p__mir-1307__0__+2__23M	hsa-mir-1307	MI0006444	hsa-miR-1307-5p	MIMAT0022727	0	2	103394339	103394361	chr10	-	0	TCGACCGGACCTCGACCGGCTCG	TCGACCGGACCTCGACCGGCTCG	not reported	not reported	not reported	1	1	1	1	CGACCGG	5p	2.21996	8.05482	2.76521	9.5805	0.494267	0.792189	0.432461	0.775528	[W (N)] and [W (T)] and [B/AA (N)] and [B/AA (T)]
miR-1307-5p__mir-1307__0__0__21M	hsa-mir-1307	MI0006444	hsa-miR-1307-5p	MIMAT0022727	0	0	103394341	103394361	chr10	-	0	TCGACCGGACCTCGACCGGCT	TCGACCGGACCTCGACCGGCT	not reported	not reported	not reported	1	1	1	1	CGACCGG	5p	24.4394	177.77	37.1414	233.542	0.900752	0.964708	0.892332	0.958617	[W (N)] and [W (T)] and [B/AA (N)] and [B/AA (T)]
miR-130a-3p__mir-130a__0__-1__21M	hsa-mir-130a	MI0000448	hsa-miR-130a-3p	MIMAT0000425	0	-1	57641252	57641272	chr11	+	0	CAGTGCAATGTTAAAAGGGCA	CAGTGCAATGTTAAAAGGGCA	not reported	not reported	not reported	1	1	1	1	AGTGCAA	3p	9.83902	10.046	11.8593	11.3216	0.808312	0.811895	0.819599	0.806163	[W (N)] and [W (T)] and [B/AA (N)] and [B/AA (T)]
miR-130a-3p__mir-130a__0__-2__20M	hsa-mir-130a	MI0000448	hsa-miR-130a-3p	MIMAT0000425	0	-2	57641252	57641271	chr11	+	0	CAGTGCAATGTTAAAAGGGC	CAGTGCAATGTTAAAAGGGC	not reported	not reported	not reported	1	1	1	1	AGTGCAA	3p	7.604	7.07435	7.69347	6.66423	0.755106	0.747402	0.784844	0.759405	[W (N)] and [W (T)] and [B/AA (N)] and [B/AA (T)]
miR-130a-3p__mir-130a__0__-3__19M	hsa-mir-130a	MI0000448	hsa-miR-130a-3p	MIMAT0000425	0	-3	57641252	57641270	chr11	+	0	CAGTGCAATGTTAAAAGGG	CAGTGCAATGTTAAAAGGG	not reported	not reported	not reported	1	1	1	1	AGTGCAA	3p	2.33935	2.89292	2.74282	2.98801	0.489789	0.553923	0.460408	0.548907	[W (N)] and [W (T)] and [B/AA (N)] and [B/AA (T)]
miR-130a-3p__mir-130a__0__-4__18M	hsa-mir-130a	MI0000448	hsa-miR-130a-3p	MIMAT0000425	0	-4	57641252	57641269	chr11	+	0	CAGTGCAATGTTAAAAGG	CAGTGCAATGTTAAAAGG	not reported	not reported	not reported	0	1	0	1	AGTGCAA	3p	1.34454	2.12764	1.51281	2.14614	0.195629	0.374776	0.141705	0.380509	[W (T)] and [B/AA (T)]
miR-130a-3p__mir-130a__0__-6__16M	hsa-mir-130a	MI0000448	hsa-miR-130a-3p	MIMAT0000425	0	-6	57641252	57641267	chr11	+	0	CAGTGCAATGTTAAAA	CAGTGCAATGTTAAAA	not reported	not reported	not reported	1	0	0	0	AGTGCAA	3p	1.76015	1.86488	2.05902	1.70029	0.319957	0.254031	0.269975	0.292727	[B/AA (N)]
miR-130a-3p__mir-130a__0__+1__23M	hsa-mir-130a	MI0000448	hsa-miR-130a-3p	MIMAT0000425	0	1	57641252	57641274	chr11	+	0	CAGTGCAATGTTAAAAGGGCATT	CAGTGCAATGTTAAAAGGGCATT	not reported	not reported	not reported	1	1	1	1	AGTGCAA	3p	3.77083	8.64318	5.18979	10.2546	0.68488	0.800251	0.65335	0.786098	[W (N)] and [W (T)] and [B/AA (N)] and [B/AA (T)]
miR-130a-3p__mir-130a__0__0__22M	hsa-mir-130a	MI0000448	hsa-miR-130a-3p	MIMAT0000425	0	0	57641252	57641273	chr11	+	0	CAGTGCAATGTTAAAAGGGCAT	CAGTGCAATGTTAAAAGGGCAT	not reported	not reported	not reported	1	1	1	1	AGTGCAA	3p	14.4585	30.9484	18.9993	35.4104	0.852204	0.902723	0.855966	0.896095	[W (N)] and [W (T)] and [B/AA (N)] and [B/AA (T)]
miR-130b-3p__mir-130b__0__-1__21M	hsa-mir-130b	MI0000748	hsa-miR-130b-3p	MIMAT0000691	0	-1	21653354	21653374	chr22	+	0	CAGTGCAATGATGAAAGGGCA	CAGTGCAATGATGAAAGGGCA	not reported	not reported	not reported	0	1	0	1	AGTGCAA	3p	1.53192	2.98886	1.77447	3.50809	0.248477	0.608563	0.194912	0.560014	[W (T)] and [B/AA (T)]
miR-130b-3p__mir-130b__0__-2__20M	hsa-mir-130b	MI0000748	hsa-miR-130b-3p	MIMAT0000691	0	-2	21653354	21653373	chr22	+	0	CAGTGCAATGATGAAAGGGC	CAGTGCAATGATGAAAGGGC	not reported	not reported	not reported	0	1	0	1	AGTGCAA	3p	1.22657	2.09264	1.25739	2.01989	0.13454	0.331422	0.107309	0.367431	[W (T)] and [B/AA (T)]
miR-130b-3p__mir-130b__0__+1__22MT	hsa-mir-130b	MI0000748	hsa-miR-130b-3p	MIMAT0000691	0	1	21653354	21653376	chr22	+	1	CAGTGCAATGATGAAAGGGCATT	CAGTGCAATGATGAAAGGGCATC	rs777309947=23:C-T	not reported	not reported	0	1	0	0	AGTGCAA	3p	1.08192	1.71351	1.08833	2.16154	0.0859907	0.379792	0.0653887	0.256001	[B/AA (T)]
miR-130b-3p__mir-130b__0__0__22M	hsa-mir-130b	MI0000748	hsa-miR-130b-3p	MIMAT0000691	0	0	21653354	21653375	chr22	+	0	CAGTGCAATGATGAAAGGGCAT	CAGTGCAATGATGAAAGGGCAT	not reported	not reported	not reported	1	1	1	1	AGTGCAA	3p	3.47767	11.5281	4.47552	13.1695	0.651379	0.828019	0.629703	0.820315	[W (N)] and [W (T)] and [B/AA (N)] and [B/AA (T)]
miR-130b-5p__mir-130b__0__-1__20M	hsa-mir-130b	MI0000748	hsa-miR-130b-5p	MIMAT0004680	0	-1	21653316	21653335	chr22	+	0	ACTCTTTCCCTGTTGCACTA	ACTCTTTCCCTGTTGCACTA	not reported	not reported	not reported	0	0	0	1	CTCTTTC	5p	1.3587	2.1971	1	1.99708	0.000179147	0.323361	0.145109	0.402723	[W (T)]
miR-130b-5p__mir-130b__0__-2__19M	hsa-mir-130b	MI0000748	hsa-miR-130b-5p	MIMAT0004680	0	-2	21653316	21653334	chr22	+	0	ACTCTTTCCCTGTTGCACT	ACTCTTTCCCTGTTGCACT	not reported	not reported	not reported	0	1	0	1	CTCTTTC	5p	1.56437	3.08337	1.30134	3.18791	0.14493	0.577033	0.204407	0.571121	[W (T)] and [B/AA (T)]
miR-130b-5p__mir-130b__0__+1__22M	hsa-mir-130b	MI0000748	hsa-miR-130b-5p	MIMAT0004680	0	1	21653316	21653337	chr22	+	0	ACTCTTTCCCTGTTGCACTACT	ACTCTTTCCCTGTTGCACTACT	not reported	not reported	not reported	0	1	1	1	CTCTTTC	5p	2.71017	7.53842	1.89629	7.99311	0.274095	0.770154	0.535829	0.767646	[W (N)] and [W (T)] and [B/AA (T)]
miR-130b-5p__mir-130b__0__0__21M	hsa-mir-130b	MI0000748	hsa-miR-130b-5p	MIMAT0004680	0	0	21653316	21653336	chr22	+	0	ACTCTTTCCCTGTTGCACTAC	ACTCTTTCCCTGTTGCACTAC	not reported	not reported	not reported	0	1	0	1	CTCTTTC	5p	1.58319	2.76957	1.19618	2.85786	0.119491	0.53565	0.211394	0.529918	[W (T)] and [B/AA (T)]
miR-132-3p__mir-132__+1__0__21M	hsa-mir-132	MI0000449	hsa-miR-132-3p	MIMAT0000426	1	0	2049929	2049949	chr17	-	0	AACAGTCTACAGCCATGGTCG	AACAGTCTACAGCCATGGTCG	not reported	not reported	not reported	1	1	1	1	ACAGTCT	3p	2.67039	2.79696	2.26009	2.79067	0.386421	0.526693	0.529559	0.534217	[W (N)] and [W (T)] and [B/AA (N)] and [B/AA (T)]
miR-132-3p__mir-132__+2__+1__20MT	hsa-mir-132	MI0000449	hsa-miR-132-3p	MIMAT0000426	2	1	2049928	2049948	chr17	-	1	ACAGTCTACAGCCATGGTCGT	ACAGTCTACAGCCATGGTCGC	rs1597296580=21:C-T	not reported	not reported	0	1	1	1	CAGTCTA	3p	2.15673	2.03273	1.67152	2.06397	0.228771	0.346471	0.412576	0.349875	[W (N)] and [W (T)] and [B/AA (T)]
miR-132-3p__mir-132__+2__+2__20MTT	hsa-mir-132	MI0000449	hsa-miR-132-3p	MIMAT0000426	2	2	2049927	2049948	chr17	-	2	ACAGTCTACAGCCATGGTCGTT	ACAGTCTACAGCCATGGTCGCC	rs1597296580=21:C-T;rs1171547384=22:C-T	not reported	not reported	0	1	1	1	CAGTCTA	3p	2.36652	2.33422	1.88946	2.26557	0.272483	0.415442	0.467395	0.439807	[W (N)] and [W (T)] and [B/AA (T)]
miR-132-3p__mir-132__0__-1__21M	hsa-mir-132	MI0000449	hsa-miR-132-3p	MIMAT0000426	0	-1	2049930	2049950	chr17	-	0	TAACAGTCTACAGCCATGGTC	TAACAGTCTACAGCCATGGTC	not reported	not reported	not reported	1	1	1	1	AACAGTC	3p	16.8654	19.6746	13.7788	17.7011	0.82354	0.854532	0.869581	0.863669	[W (N)] and [W (T)] and [B/AA (N)] and [B/AA (T)]
miR-132-3p__mir-132__0__-2__20M	hsa-mir-132	MI0000449	hsa-miR-132-3p	MIMAT0000426	0	-2	2049931	2049950	chr17	-	0	TAACAGTCTACAGCCATGGT	TAACAGTCTACAGCCATGGT	not reported	not reported	not reported	1	1	1	1	AACAGTC	3p	2.62638	3.0708	2.90256	3.22663	0.516661	0.581512	0.520064	0.56933	[W (N)] and [W (T)] and [B/AA (N)] and [B/AA (T)]
miR-132-3p__mir-132__0__-3__19M	hsa-mir-132	MI0000449	hsa-miR-132-3p	MIMAT0000426	0	-3	2049932	2049950	chr17	-	0	TAACAGTCTACAGCCATGG	TAACAGTCTACAGCCATGG	not reported	not reported	not reported	1	1	1	1	AACAGTC	3p	2.65611	4.57752	2.43323	3.7738	0.427445	0.626478	0.52723	0.681297	[W (N)] and [W (T)] and [B/AA (N)] and [B/AA (T)]
miR-132-3p__mir-132__0__-4__18M	hsa-mir-132	MI0000449	hsa-miR-132-3p	MIMAT0000426	0	-4	2049933	2049950	chr17	-	0	TAACAGTCTACAGCCATG	TAACAGTCTACAGCCATG	not reported	not reported	not reported	0	1	0	1	AACAGTC	3p	1.84951	2.50205	1.59673	2.18284	0.214977	0.38857	0.299713	0.483698	[W (T)] and [B/AA (T)]
miR-132-3p__mir-132__0__+1__22MT	hsa-mir-132	MI0000449	hsa-miR-132-3p	MIMAT0000426	0	1	2049928	2049950	chr17	-	1	TAACAGTCTACAGCCATGGTCGT	TAACAGTCTACAGCCATGGTCGC	rs1597296580=23:C-T	not reported	not reported	1	1	1	1	AACAGTC	3p	9.70998	13.6156	7.75506	14.4158	0.75636	0.837872	0.818166	0.834289	[W (N)] and [W (T)] and [B/AA (N)] and [B/AA (T)]
miR-132-3p__mir-132__0__+2__22MTT	hsa-mir-132	MI0000449	hsa-miR-132-3p	MIMAT0000426	0	2	2049927	2049950	chr17	-	2	TAACAGTCTACAGCCATGGTCGTT	TAACAGTCTACAGCCATGGTCGCC	rs1597296580=23:C-T;rs1171547384=24:C-T	not reported	not reported	0	1	0	1	AACAGTC	3p	1.52694	2.03389	1.61766	2.06219	0.21856	0.346113	0.192583	0.350233	[W (T)] and [B/AA (T)]
miR-132-3p__mir-132__0__0__22M	hsa-mir-132	MI0000449	hsa-miR-132-3p	MIMAT0000426	0	0	2049929	2049950	chr17	-	0	TAACAGTCTACAGCCATGGTCG	TAACAGTCTACAGCCATGGTCG	not reported	not reported	not reported	1	1	1	1	AACAGTC	3p	52.0525	66.4002	44.9046	69.0598	0.90971	0.93067	0.928341	0.932103	[W (N)] and [W (T)] and [B/AA (N)] and [B/AA (T)]
[truncated: 4,336 more rows]
