# Supplementary material for: Disparities in Lung Cancer: miRNA Isoform Characterization in Lung Adenocarcinoma
Source: Preprints.org preprint supplement (doi:10.20944/preprints202112.0501.v1), 2021-12-31
Supplement: Supplementary file 1 [file supplementary › Table S3.xlsx]

## Sheet: heatmap
Entity_ID	pre-miRNA	MI_ID	miRNA	MIMAT_ID	End_5p	End_3p	Start	End	Chr	Strand	No_mods	Isoform_seq	Ref_iso_seq	Known_DNA_SNV	Unknown_SNV	Known_RNA_Editing	Common_SNV	PValue	FDR	AVG ctrl (white)	AVG ctrl (black or african american)	AVG cond (white)	AVG cond (black or african american)	ctrl_w_gmean	cond_w_gmean	ctrl_b/aa_gmean	cond_b/aa_gmean	is_monotonic_increasing	is_monotonic_decreasing	both_up	both_down	w_up_b/aa_down	w_down_b/aa_up
let-7b-3p__let-7b__0__-1__21M	hsa-let-7b	MI0000063	hsa-let-7b-3p	MIMAT0004482	0	-1	46113745	46113765	chr22	+	0	CTATACAACCTACTGCCTTCC	CTATACAACCTACTGCCTTCC	not reported	not reported	not reported	not reported	9.53859e-16	7.27641e-15	55.678	27.9795	15.5761	13.7996	33.4247	13.8561	27.4066	12.3055	False	False	False	True	False	False
miR-455-3p__mir-455__0__0__21M	hsa-mir-455	MI0003513	hsa-miR-455-3p	MIMAT0004784	0	0	114209487	114209507	chr9	+	0	GCAGTCCATGGGCATATACAC	GCAGTCCATGGGCATATACAC	not reported	not reported	not reported	not reported	3.80367e-10	1.0863e-09	38.7483	5.36432	41.7732	36.9805	11.3415	27.9753	4.8872	28.0314	False	False	True	False	False	False
miR-223-3p__mir-223__0__-6__16M	hsa-mir-223	MI0000300	hsa-miR-223-3p	MIMAT0000280	0	-6	66018937	66018952	chrX	+	0	TGTCAGTTTGTCAAAT	TGTCAGTTTGTCAAAT	not reported	not reported	not reported	not reported	0.00111099	0.00167603	2.26079	2.95782	2.35613	1.32543	1.56597	1.11587	2.14213	0.685377	False	False	False	True	False	False
miR-183-5p__mir-183__-2__-2__22M	hsa-mir-183	MI0000273	hsa-miR-183-5p	MIMAT0000261	-2	-2	129774969	129774990	chr7	-	0	TGTATGGCACTGGTAGAATTCA	TGTATGGCACTGGTAGAATTCA	not reported	not reported	not reported	not reported	2.8752e-24	2.65021e-22	2.04611	1.8517	18.2732	18.7042	1.88237	13.0658	1.72133	13.7045	False	False	True	False	False	False
miR-27b-3p__mir-27b__-1__0__22M	hsa-mir-27b	MI0000440	hsa-miR-27b-3p	MIMAT0000419	-1	0	95085504	95085525	chr9	+	0	GTTCACAGTGGCTAAGTTCTGC	GTTCACAGTGGCTAAGTTCTGC	not reported	not reported	not reported	not reported	4.21773e-08	9.79886e-08	4.95664	3.89862	9.57911	10.7241	4.26244	7.7219	3.83997	8.7823	False	False	True	False	False	False
miR-125b-2-3p__mir-125b-2__+2__+1__21M	hsa-mir-125b-2	MI0000470	hsa-miR-125b-2-3p	MIMAT0004603	2	1	16590292	16590312	chr21	+	0	ACAAGTCAGGCTCTTGGGACC	ACAAGTCAGGCTCTTGGGACC	not reported	not reported	not reported	not reported	3.63116e-20	6.28548e-19	7.08387	6.54626	1.9101	1.54256	6.10078	1.49846	6.36606	1.27783	False	False	False	True	False	False
miR-29b-3p__mir-29b-1__0__-2__21M	hsa-mir-29b-1	MI0000105	hsa-miR-29b-3p	MIMAT0000100	0	-2	130877469	130877489	chr7	-	0	TAGCACCATTTGAAATCAGTG	TAGCACCATTTGAAATCAGTG	not reported	not reported	not reported	not reported	1.9126e-11	6.42824e-11	56.5336	65.605	149.336	221.957	35.0752	114.879	62.6507	156.919	False	False	True	False	False	False
miR-96-5p__mir-96__0__-2__21M	hsa-mir-96	MI0000098	hsa-miR-96-5p	MIMAT0000095	0	-2	129774741	129774761	chr7	-	0	TTTGGCACTAGCACATTTTTG	TTTGGCACTAGCACATTTTTG	not reported	not reported	not reported	not reported	2.41618e-19	3.50727e-18	0.723292	1.30059	6.65899	8.19548	0.574925	4.55603	0.968182	5.74463	False	False	True	False	False	False
miR-16-5p__mir-16-1__+5__0__17M	hsa-mir-16-1	MI0000070	hsa-miR-16-5p	MIMAT0000069	5	0	50049027	50049043	chr13	-	0	GCACGTAAATATTGGCG	GCACGTAAATATTGGCG	not reported	not reported	not reported	not reported	8.07508e-08	1.81652e-07	2.56086	3.35183	11.5819	8.25699	1.95912	5.81623	2.10214	4.79631	False	False	True	False	False	False
miR-148a-3p__mir-148a__0__0__22M	hsa-mir-148a	MI0000253	hsa-miR-148a-3p	MIMAT0000243	0	0	25949922	25949943	chr7	-	0	TCAGTGCACTACAGAACTTTGT	TCAGTGCACTACAGAACTTTGT	not reported	not reported	not reported	not reported	0.00368038	0.00526564	10144.4	12924.8	17499.5	19804	7475.94	13606.7	12549.9	15208.1	False	False	True	False	False	False
miR-29a-3p__mir-29a__+2__-1__19M	hsa-mir-29a	MI0000087	hsa-miR-29a-3p	MIMAT0000086	2	-1	130876749	130876767	chr7	-	0	GCACCATCTGAAATCGGTT	GCACCATCTGAAATCGGTT	not reported	not reported	not reported	not reported	0.000655263	0.00101596	1.21601	1.06984	5.10674	3.04225	1.01369	2.13842	0.982175	1.05665	False	False	True	False	False	False
miR-1306-5p__mir-1306__0__-1__21M	hsa-mir-1306	MI0006443	hsa-miR-1306-5p	MIMAT0022726	0	-1	20086072	20086092	chr22	+	0	CCACCTCCCCTGCAAACGTCC	CCACCTCCCCTGCAAACGTCC	not reported	not reported	not reported	not reported	0.00011005	0.000185701	8.31826	0.895493	2.33975	2.42029	1.88919	1.86805	0.799181	2.11744	False	False	False	False	False	True
miR-365a-3p__mir-365a__0__-1__21M	hsa-mir-365a	MI0000767	hsa-miR-365a-3p	MIMAT0000710	0	-1	14309340	14309360	chr16	+	0	TAATGCCCCTAAAAATCCTTA	TAATGCCCCTAAAAATCCTTA	not reported	not reported	not reported	not reported	0.0207254	0.0268782	6.54031	4.86156	8.67567	11.9228	5.54797	6.84254	4.70713	8.69411	False	False	True	False	False	False
miR-338-3p__mir-338__0__-1__21M	hsa-mir-338	MI0000814	hsa-miR-338-3p	MIMAT0000763	0	-1	81125888	81125908	chr17	-	0	TCCAGCATCAGTGATTTTGTT	TCCAGCATCAGTGATTTTGTT	not reported	not reported	not reported	not reported	4.17854e-05	7.30156e-05	71.1143	96.6366	50.7888	35.9835	47.262	25.4057	90.5958	24.6717	False	False	False	True	False	False
miR-21-5p__mir-21__-1__-4__19M	hsa-mir-21	MI0000077	hsa-miR-21-5p	MIMAT0000076	-1	-4	59841272	59841290	chr17	+	0	GTAGCTTATCAGACTGATG	GTAGCTTATCAGACTGATG	not reported	not reported	not reported	not reported	9.90469e-17	9.08423e-16	0.738168	0.77695	3.31346	2.38	0.574648	2.59786	0.704959	2.01132	False	False	True	False	False	False
miR-183-5p__mir-183__+7__+1__16M	hsa-mir-183	MI0000273	hsa-miR-183-5p	MIMAT0000261	7	1	129774966	129774981	chr7	-	0	CTGGTAGAATTCACTG	CTGGTAGAATTCACTG	not reported	not reported	not reported	not reported	1.12114e-12	4.68137e-12	0.168636	0	1.97075	1.1617	0.138478	1.20015	0	0.73805	False	False	True	False	False	False
miR-23a-3p__mir-23a__+1__0__20M	hsa-mir-23a	MI0000079	hsa-miR-23a-3p	MIMAT0000078	1	0	13836595	13836614	chr19	-	0	TCACATTGCCAGGGATTTCC	TCACATTGCCAGGGATTTCC	not reported	not reported	not reported	not reported	6.51022e-08	1.48259e-07	39.0277	38.7704	31.5121	18.5631	31.4115	22.3265	37.9617	14.1577	False	False	False	True	False	False
miR-429__mir-429__0__0__22M	hsa-mir-429	MI0001641	hsa-miR-429	MIMAT0001536	0	0	1169055	1169076	chr1	+	0	TAATACTGTCTGGTAAAACCGT	TAATACTGTCTGGTAAAACCGT	not reported	not reported	not reported	not reported	2.15139e-13	1.04784e-12	22.2314	31.3222	70.7771	86.0534	14.5439	52.0269	29.1867	65.2219	False	False	True	False	False	False
miR-151a-3p__mir-151a__0__-1__20M	hsa-mir-151a	MI0000809	hsa-miR-151a-3p	MIMAT0000757	0	-1	140732588	140732607	chr8	-	0	CTAGACTGAAGCTCCTTGAG	CTAGACTGAAGCTCCTTGAG	not reported	not reported	not reported	not reported	5.78589e-05	0.00010014	499.648	621.603	408.181	363.516	376.459	341.966	609.067	315.767	False	False	False	True	False	False
miR-92a-3p__mir-92a-1__0__-3__19M	hsa-mir-92a-1	MI0000093	hsa-miR-92a-3p	MIMAT0000092	0	-3	91351361	91351379	chr13	+	0	TATTGCACTTGTCCCGGCC	TATTGCACTTGTCCCGGCC	not reported	not reported	not reported	not reported	1.01707e-05	1.87779e-05	25.9985	14.2918	38.6206	27.788	17.6314	29.3795	12.183	22.9872	False	False	True	False	False	False
miR-423-3p__mir-423__0__0__23M	hsa-mir-423	MI0001445	hsa-miR-423-3p	MIMAT0001340	0	0	30117131	30117153	chr17	+	0	AGCTCGGTCTGAGGCCCCTCAGT	AGCTCGGTCTGAGGCCCCTCAGT	not reported	not reported	not reported	not reported	2.13176e-07	4.58566e-07	60.4388	22.7667	47.8479	54.4948	28.2914	40.6765	22.3748	47.115	False	False	True	False	False	False
miR-218-5p__mir-218-1__0__-1__20M	hsa-mir-218-1	MI0000294	hsa-miR-218-5p	MIMAT0000275	0	-1	20528299	20528318	chr4	+	0	TTGTGCTTGATCTAACCATG	TTGTGCTTGATCTAACCATG	not reported	not reported	not reported	not reported	1.1393e-11	3.94053e-11	7.04102	8.07765	1.92086	1.55902	4.79409	1.53668	7.48036	1.21858	False	False	False	True	False	False
let-7c-5p__let-7c__0__-3__19M	hsa-let-7c	MI0000064	hsa-let-7c-5p	MIMAT0000064	0	-3	16539838	16539856	chr21	+	0	TGAGGTAGTAGGTTGTATG	TGAGGTAGTAGGTTGTATG	not reported	not reported	not reported	not reported	3.40014e-21	7.50678e-20	268.981	226.778	71.3833	67.028	232.911	50.4803	214.695	44.4871	False	False	False	True	False	False
miR-451a__mir-451a__+1__-2__19M	hsa-mir-451a	MI0001729	hsa-miR-451a	MIMAT0001631	1	-2	28861405	28861423	chr17	-	0	AACCGTTACCATTACTGAG	AACCGTTACCATTACTGAG	not reported	not reported	not reported	not reported	4.90727e-12	1.8057e-11	25.8563	36.5169	5.05906	3.45658	13.6482	2.46475	19.6015	1.83392	False	False	False	True	False	False
miR-34c-3p__mir-34c__0__-1__21M	hsa-mir-34c	MI0000743	hsa-miR-34c-3p	MIMAT0004677	0	-1	111513484	111513504	chr11	+	0	AATCACTAACCACACGGCCAG	AATCACTAACCACACGGCCAG	not reported	not reported	not reported	not reported	0.00366985	0.00525262	23.679	10.5239	12.4388	17.8923	10.9734	4.51159	5.62903	5.45475	False	False	False	True	False	False
miR-708-3p__mir-708__+1__-2__19M	hsa-mir-708	MI0005543	hsa-miR-708-3p	MIMAT0004927	1	-2	79402034	79402052	chr11	-	0	AACTAGACTGTGAGCTTCT	AACTAGACTGTGAGCTTCT	not reported	not reported	not reported	not reported	1.46685e-14	9.18775e-14	0.572658	0.550373	3.54755	3.84484	0.456227	2.42018	0.500624	2.71398	False	False	True	False	False	False
miR-30d-5p__mir-30d__0__-1__21M	hsa-mir-30d	MI0000255	hsa-miR-30d-5p	MIMAT0000245	0	-1	134804920	134804940	chr8	-	0	TGTAAACATCCCCGACTGGAA	TGTAAACATCCCCGACTGGAA	not reported	not reported	not reported	not reported	6.98864e-17	6.60695e-16	1804.25	1996.34	773.972	712.446	1651.93	586.378	1925.87	599.497	False	False	False	True	False	False
miR-106b-3p__mir-106b__-2__-3__21M	hsa-mir-106b	MI0000734	hsa-miR-106b-3p	MIMAT0004672	-2	-3	100094005	100094025	chr7	-	0	TACCGCACTGTGGGTACTTGC	TACCGCACTGTGGGTACTTGC	not reported	not reported	not reported	not reported	0.000102764	0.000174123	5.10467	7.21006	8.88511	11.3302	4.66405	6.80303	6.37185	8.93742	False	False	True	False	False	False
miR-15b-5p__mir-15b__0__-4__18M	hsa-mir-15b	MI0000438	hsa-miR-15b-5p	MIMAT0000417	0	-4	160404607	160404624	chr3	+	0	TAGCAGCACATCATGGTT	TAGCAGCACATCATGGTT	not reported	not reported	not reported	not reported	1.04876e-13	5.49256e-13	13.5392	13.0623	3.38396	4.26786	9.74995	2.55038	9.02142	2.82702	False	False	False	True	False	False
miR-139-5p__mir-139__0__-3__20M	hsa-mir-139	MI0000261	hsa-miR-139-5p	MIMAT0000250	0	-3	72615105	72615124	chr11	-	0	TCTACAGTGCACGTGTCTCC	TCTACAGTGCACGTGTCTCC	not reported	not reported	not reported	not reported	9.34114e-13	3.96783e-12	19.4061	5.26613	2.83044	1.96672	8.43649	2.11482	4.95406	1.61215	False	False	False	True	False	False
miR-505-3p__mir-505__0__-3__19M	hsa-mir-505	MI0003190	hsa-miR-505-3p	MIMAT0002876	0	-3	139924163	139924181	chrX	-	0	CGTCAACACTTGCTGGTTT	CGTCAACACTTGCTGGTTT	not reported	not reported	not reported	not reported	1.37504e-05	2.50855e-05	1.03365	0.743709	2.08605	2.09025	0.783818	1.64195	0.663106	1.58797	False	False	True	False	False	False
miR-224-5p__mir-224__+1__-3__21M	hsa-mir-224	MI0000301	hsa-miR-224-5p	MIMAT0000281	1	-3	151958631	151958651	chrX	-	0	CAAGTCACTAGTGGTTCCGTT	CAAGTCACTAGTGGTTCCGTT	not reported	not reported	not reported	not reported	1.30362e-12	5.38236e-12	0.502991	0.250231	5.10372	4.52866	0.417573	2.6111	0.243998	2.30503	False	False	True	False	False	False
let-7f-5p__let-7f-1__0__0__22M	hsa-let-7f-1	MI0000067	hsa-let-7f-5p	MIMAT0000067	0	0	94176353	94176374	chr9	+	0	TGAGGTAGTAGATTGTATAGTT	TGAGGTAGTAGATTGTATAGTT	not reported	not reported	not reported	not reported	2.22582e-11	7.4e-11	19212.1	24353.5	5994.71	6216.73	10028.3	4386.07	24059.2	4901.48	False	False	False	True	False	False
miR-99b-5p__mir-99b__0__+1__23M	hsa-mir-99b	MI0000746	hsa-miR-99b-5p	MIMAT0000689	0	1	51692618	51692640	chr19	+	0	CACCCGTAGAACCGACCTTGCGG	CACCCGTAGAACCGACCTTGCGG	not reported	not reported	not reported	not reported	1.31161e-05	2.39876e-05	7.57414	4.46939	11.7402	15.6533	5.99407	8.99179	4.26584	11.8097	False	False	True	False	False	False
miR-1307-5p__mir-1307__0__+1__22M	hsa-mir-1307	MI0006444	hsa-miR-1307-5p	MIMAT0022727	0	1	103394340	103394361	chr10	-	0	TCGACCGGACCTCGACCGGCTC	TCGACCGGACCTCGACCGGCTC	not reported	not reported	not reported	not reported	4.32873e-22	1.2871e-20	4.39129	6.67145	30.935	38.0981	3.53333	22.1347	6.43881	29.3202	False	False	True	False	False	False
miR-130a-3p__mir-130a__0__+1__23M	hsa-mir-130a	MI0000448	hsa-miR-130a-3p	MIMAT0000425	0	1	57641252	57641274	chr11	+	0	CAGTGCAATGTTAAAAGGGCATT	CAGTGCAATGTTAAAAGGGCATT	not reported	not reported	not reported	not reported	3.22389e-07	6.80006e-07	4.25256	5.41742	9.62535	11.1845	3.49934	7.51521	5.33187	9.12937	False	False	True	False	False	False
let-7f-5p__let-7f-1__0__+1__23M	hsa-let-7f-1	MI0000067	hsa-let-7f-5p	MIMAT0000067	0	1	94176353	94176375	chr9	+	0	TGAGGTAGTAGATTGTATAGTTG	TGAGGTAGTAGATTGTATAGTTG	not reported	not reported	not reported	not reported	2.19139e-10	6.45339e-10	27.7335	34.4084	11.3614	12.0311	17.1612	9.48562	34.2982	10.2986	False	False	False	True	False	False
miR-143-5p__mir-143__0__0__22M	hsa-mir-143	MI0000459	hsa-miR-143-5p	MIMAT0004599	0	0	149428944	149428965	chr5	+	0	GGTGCAGTGCTGCATCTCTGGT	GGTGCAGTGCTGCATCTCTGGT	not reported	not reported	not reported	not reported	9.23221e-06	1.70879e-05	0.920557	0.455902	1.70178	1.92592	0.74032	1.41294	0.429081	1.58321	False	False	True	False	False	False
miR-17-5p__mir-17__+1__0__22M	hsa-mir-17	MI0000071	hsa-miR-17-5p	MIMAT0000070	1	0	91350619	91350640	chr13	+	0	AAAGTGCTTACAGTGCAGGTAG	AAAGTGCTTACAGTGCAGGTAG	not reported	not reported	not reported	not reported	0.0141453	0.0188213	0.718332	1.37098	1.40398	2.61963	0.613485	1.0255	1.06704	1.54902	True	False	False	False	False	False
miR-320a-3p__mir-320a__0__-6__16M	hsa-mir-320a	MI0000542	hsa-miR-320a-3p	MIMAT0000510	0	-6	22244981	22244996	chr8	-	0	AAAAGCTGGGTTGAGA	AAAAGCTGGGTTGAGA	not reported	not reported	not reported	not reported	0.000331936	0.000529804	13.2858	6.4088	6.43486	4.32884	8.05137	4.17511	5.5972	3.6629	False	False	False	True	False	False
miR-93-5p__mir-93__0__-3__20M	hsa-mir-93	MI0000095	hsa-miR-93-5p	MIMAT0000093	0	-3	100093818	100093837	chr7	-	0	CAAAGTGCTGTTCGTGCAGG	CAAAGTGCTGTTCGTGCAGG	not reported	not reported	not reported	not reported	9.93141e-06	1.83452e-05	42.1156	61.7666	78.8854	83.142	38.4925	62.8398	48.4981	69.0602	False	False	True	False	False	False
miR-31-5p__mir-31__0__0__21M	hsa-mir-31	MI0000089	hsa-miR-31-5p	MIMAT0000089	0	0	21512158	21512178	chr9	-	0	AGGCAAGATGCTGGCATAGCT	AGGCAAGATGCTGGCATAGCT	not reported	not reported	not reported	not reported	9.61508e-13	4.07013e-12	0.0628586	0.0312528	3.73932	4.77717	0.0468165	1.32565	0.0290582	1.7314	False	False	True	False	False	False
miR-589-3p__mir-589__0__-1__23M	hsa-mir-589	MI0003599	hsa-miR-589-3p	MIMAT0003256	0	-1	5495835	5495857	chr7	-	0	TCAGAACAAATGCCGGTTCCCAG	TCAGAACAAATGCCGGTTCCCAG	not reported	not reported	not reported	not reported	3.60125e-12	1.36463e-11	0.296751	0.134386	1.46181	1.90853	0.232636	1.10356	0.116922	1.49533	False	False	True	False	False	False
miR-10a-5p__mir-10a__+1__-1__21M	hsa-mir-10a	MI0000266	hsa-miR-10a-5p	MIMAT0000253	1	-1	48579905	48579925	chr17	-	0	ACCCTGTAGATCCGAATTTGT	ACCCTGTAGATCCGAATTTGT	not reported	not reported	not reported	not reported	0.0213739	0.0276608	4349.73	4093.97	4220.65	3659.07	3206.31	3217.82	4048.24	2877.8	False	False	False	False	True	False
miR-17-3p__mir-17__+1__-2__19M	hsa-mir-17	MI0000071	hsa-miR-17-3p	MIMAT0000071	1	-2	91350656	91350674	chr13	+	0	CTGCAGTGAAGGCACTTGT	CTGCAGTGAAGGCACTTGT	not reported	not reported	not reported	not reported	8.82617e-05	0.000150518	0.634872	0.688327	1.75411	1.46423	0.439044	1.15979	0.575298	1.17645	False	False	True	False	False	False
miR-183-5p__mir-183__+5__+1__18M	hsa-mir-183	MI0000273	hsa-miR-183-5p	MIMAT0000261	5	1	129774966	129774983	chr7	-	0	CACTGGTAGAATTCACTG	CACTGGTAGAATTCACTG	not reported	not reported	not reported	not reported	1.70513e-09	4.52289e-09	1.40466	0.829167	7.19585	5.74655	1.047	3.82397	0.74244	2.4085	False	False	True	False	False	False
miR-125a-5p__mir-125a__0__0__24M	hsa-mir-125a	MI0000469	hsa-miR-125a-5p	MIMAT0000443	0	0	51693268	51693291	chr19	+	0	TCCCTGAGACCCTTTAACCTGTGA	TCCCTGAGACCCTTTAACCTGTGA	not reported	not reported	not reported	not reported	0.00496299	0.00700288	73.5013	24.1778	51.7863	59.5174	34.2453	38.9438	23.3725	46.5954	False	False	True	False	False	False
miR-196b-5p__mir-196b__0__0__22M	hsa-mir-196b	MI0001150	hsa-miR-196b-5p	MIMAT0001080	0	0	27169528	27169549	chr7	-	0	TAGGTAGTTTCCTGTTGTTGGG	TAGGTAGTTTCCTGTTGTTGGG	not reported	not reported	not reported	not reported	5.91875e-10	1.65196e-09	3.97137	0.4761	22.3	17.4623	0.597694	4.23074	0.428554	4.05646	False	False	True	False	False	False
miR-330-5p__mir-330__0__-2__20M	hsa-mir-330	MI0000803	hsa-miR-330-5p	MIMAT0004693	0	-2	45639051	45639070	chr19	-	0	TCTCTGGGCCTGTGTCTTAG	TCTCTGGGCCTGTGTCTTAG	not reported	not reported	not reported	not reported	0.0202965	0.0263649	2.92499	1.23891	3.12254	2.68024	2.30779	2.59716	1.2315	2.37132	False	False	True	False	False	False
miR-140-3p__mir-140__0__0__21M	hsa-mir-140	MI0000456	hsa-miR-140-3p	MIMAT0004597	0	0	69933142	69933162	chr16	+	0	TACCACAGGGTAGAACCACGG	TACCACAGGGTAGAACCACGG	not reported	not reported	not reported	not reported	2.14898e-24	2.08508e-22	128.027	123.896	31.701	31.0284	114.113	26.857	117.82	26.6585	False	False	False	True	False	False
miR-374a-3p__mir-374a__0__0__22M	hsa-mir-374a	MI0000782	hsa-miR-374a-3p	MIMAT0004688	0	0	74287295	74287316	chrX	-	0	CTTATCAGATTGTATTGTAATT	CTTATCAGATTGTATTGTAATT	not reported	not reported	not reported	not reported	0.00574277	0.00804774	564.094	601.342	444.516	501.924	226.85	385.089	577.661	446.711	False	False	False	False	True	False
miR-455-5p__mir-455__0__0__22M	hsa-mir-455	MI0003513	hsa-miR-455-5p	MIMAT0003150	0	0	114209449	114209470	chr9	+	0	TATGTGCCTTTGGACTACATCG	TATGTGCCTTTGGACTACATCG	not reported	not reported	not reported	not reported	7.9612e-07	1.61724e-06	7.03194	7.59358	14.8722	14.947	5.1491	12.1864	7.42573	12.1918	False	False	True	False	False	False
miR-200b-3p__mir-200b__0__+1__23M	hsa-mir-200b	MI0000342	hsa-miR-200b-3p	MIMAT0000318	0	1	1167160	1167182	chr1	+	0	TAATACTGCCTGGTAATGATGAC	TAATACTGCCTGGTAATGATGAC	not reported	not reported	not reported	not reported	1.76767e-07	3.82927e-07	76.2919	71.222	136.182	147.033	51.0669	104.004	65.8272	115.291	False	False	True	False	False	False
miR-26a-5p__mir-26a-1__0__0__22M	hsa-mir-26a-1	MI0000083	hsa-miR-26a-5p	MIMAT0000082	0	0	37969413	37969434	chr3	+	0	TTCAAGTAATCCAGGATAGGCT	TTCAAGTAATCCAGGATAGGCT	not reported	not reported	not reported	not reported	6.22545e-09	1.56144e-08	1260.93	1406.71	757.841	870.03	1081.65	665.745	1363.24	739.011	False	False	False	True	False	False
miR-132-3p__mir-132__0__-3__19M	hsa-mir-132	MI0000449	hsa-miR-132-3p	MIMAT0000426	0	-3	2049932	2049950	chr17	-	0	TAACAGTCTACAGCCATGG	TAACAGTCTACAGCCATGG	not reported	not reported	not reported	not reported	1.21259e-06	2.4274e-06	2.36921	1.9658	4.29488	3.30514	1.91211	3.55361	1.83694	2.7276	False	False	True	False	False	False
miR-374a-5p__mir-374a__0__-1__21M	hsa-mir-374a	MI0000782	hsa-miR-374a-5p	MIMAT0000727	0	-1	74287326	74287346	chrX	-	0	TTATAATACAACCTGATAAGT	TTATAATACAACCTGATAAGT	not reported	not reported	not reported	not reported	7.08158e-13	3.08262e-12	19.6689	25.2214	5.53433	6.87964	11.6033	4.91849	24.5487	6.13529	False	False	False	True	False	False
miR-30e-5p__mir-30e__+1__-3__18M	hsa-mir-30e	MI0000749	hsa-miR-30e-5p	MIMAT0000692	1	-3	40754372	40754389	chr1	+	0	GTAAACATCCTTGACTGG	GTAAACATCCTTGACTGG	not reported	not reported	not reported	not reported	0.000786096	0.00120865	18.2755	15.6104	37.2489	45.4359	10.7015	23.1105	12.9948	28.6865	False	False	True	False	False	False
miR-193b-5p__mir-193b__0__0__22M	hsa-mir-193b	MI0003137	hsa-miR-193b-5p	MIMAT0004767	0	0	14303980	14304001	chr16	+	0	CGGGGTTTTGAGGGCGAGATGA	CGGGGTTTTGAGGGCGAGATGA	not reported	not reported	not reported	not reported	4.32115e-06	8.25496e-06	3.01923	0.415898	2.54386	3.06793	1.28378	1.89708	0.407249	2.30428	False	False	True	False	False	False
miR-34a-5p__mir-34a__0__-3__19M	hsa-mir-34a	MI0000268	hsa-miR-34a-5p	MIMAT0000255	0	-3	9151738	9151756	chr1	-	0	TGGCAGTGTCTTAGCTGGT	TGGCAGTGTCTTAGCTGGT	not reported	not reported	not reported	not reported	3.69795e-07	7.73799e-07	1.10128	1.18059	2.45078	1.95281	0.919727	1.99095	1.10513	1.55352	False	False	True	False	False	False
miR-221-3p__mir-221__0__-3__20M	hsa-mir-221	MI0000298	hsa-miR-221-3p	MIMAT0000278	0	-3	45746183	45746202	chrX	-	0	AGCTACATTGTCTGCTGGGT	AGCTACATTGTCTGCTGGGT	not reported	not reported	not reported	not reported	2.27616e-06	4.46868e-06	77.3281	85.843	52.6523	36.8935	59.1777	34.4249	77.5469	29.8424	False	False	False	True	False	False
miR-29b-3p__mir-29b-1__-1__-2__22M	hsa-mir-29b-1	MI0000105	hsa-miR-29b-3p	MIMAT0000100	-1	-2	130877469	130877490	chr7	-	0	CTAGCACCATTTGAAATCAGTG	CTAGCACCATTTGAAATCAGTG	not reported	not reported	not reported	not reported	0.031479	0.0399942	25.6428	37.3401	34.2047	39.8772	16.3345	27.5875	35.8628	33.5927	False	False	False	False	True	False
let-7b-5p__let-7b__0__0__22M	hsa-let-7b	MI0000063	hsa-let-7b-5p	MIMAT0000063	0	0	46113691	46113712	chr22	+	0	TGAGGTAGTAGGTTGTGTGGTT	TGAGGTAGTAGGTTGTGTGGTT	not reported	not reported	not reported	not reported	4.90358e-11	1.55858e-10	8541.14	5200.52	3302.98	3168.09	5237.86	2930.45	5114.03	2837.4	False	False	False	True	False	False
miR-149-5p__mir-149__0__-3__20M	hsa-mir-149	MI0000478	hsa-miR-149-5p	MIMAT0000450	0	-3	240456015	240456034	chr2	+	0	TCTGGCTCCGTGTCTTCACT	TCTGGCTCCGTGTCTTCACT	not reported	not reported	not reported	not reported	0.0247949	0.031831	8.0016	3.41446	12.3004	18.4737	5.34231	7.05	3.10062	9.5989	False	False	True	False	False	False
miR-708-3p__mir-708__0__+1__23M	hsa-mir-708	MI0005543	hsa-miR-708-3p	MIMAT0004927	0	1	79402031	79402053	chr11	-	0	CAACTAGACTGTGAGCTTCTAGA	CAACTAGACTGTGAGCTTCTAGA	not reported	not reported	not reported	not reported	1.79974e-24	2.03335e-22	0.937026	1.06079	12.7774	13.6872	0.748955	9.01496	0.96734	10.9761	False	False	True	False	False	False
miR-143-3p__mir-143__0__+2__23M	hsa-mir-143	MI0000459	hsa-miR-143-3p	MIMAT0000435	0	2	149428978	149429000	chr5	+	0	TGAGATGAAGCACTGTAGCTCAG	TGAGATGAAGCACTGTAGCTCAG	not reported	not reported	not reported	not reported	7.1176e-12	2.5503e-11	93.7014	104.065	27.997	29.1211	58.512	21.9467	99.5956	24.1659	False	False	False	True	False	False
miR-199b-5p__mir-199b__0__0__23M	hsa-mir-199b	MI0000282	hsa-miR-199b-5p	MIMAT0000263	0	0	128244783	128244805	chr9	-	0	CCCAGTGTTTAGACTATCTGTTC	CCCAGTGTTTAGACTATCTGTTC	not reported	not reported	not reported	not reported	6.89304e-09	1.72186e-08	37.1677	55.1257	96.8791	100.086	26.8879	73.5492	52.7811	78.5178	False	False	True	False	False	False
miR-151a-3p__mir-151a__-1__-1__21M	hsa-mir-151a	MI0000809	hsa-miR-151a-3p	MIMAT0000757	-1	-1	140732588	140732608	chr8	-	0	ACTAGACTGAAGCTCCTTGAG	ACTAGACTGAAGCTCCTTGAG	not reported	not reported	not reported	not reported	5.76284e-11	1.81759e-10	5.73255	5.83117	11.9886	12.8302	5.01934	10.1423	5.72577	11.3174	False	False	True	False	False	False
miR-21-5p__mir-21__-1__+1__24M	hsa-mir-21	MI0000077	hsa-miR-21-5p	MIMAT0000076	-1	1	59841272	59841295	chr17	+	0	GTAGCTTATCAGACTGATGTTGAC	GTAGCTTATCAGACTGATGTTGAC	not reported	not reported	not reported	not reported	8.60199e-23	3.20359e-21	0.559845	0.352401	6.15202	7.47049	0.432173	4.31383	0.29934	5.29702	False	False	True	False	False	False
miR-30a-5p__mir-30a__0__+2__24M	hsa-mir-30a	MI0000088	hsa-miR-30a-5p	MIMAT0000087	0	2	71403593	71403616	chr6	-	0	TGTAAACATCCTCGACTGGAAGCT	TGTAAACATCCTCGACTGGAAGCT	not reported	not reported	not reported	not reported	8.15304e-06	1.51666e-05	787.225	993.296	554.014	465.644	614.01	341.59	990.353	313.538	False	False	False	True	False	False
miR-151b__mir-151b__0__0__18M	hsa-mir-151b	MI0003772	hsa-miR-151b	MIMAT0010214	0	0	100109438	100109455	chr14	-	0	TCGAGGAGCTCACAGTCT	TCGAGGAGCTCACAGTCT	not reported	not reported	not reported	not reported	0.000292451	0.000469832	3.13742	3.44465	8.22173	11.7551	2.64309	4.72514	3.01537	7.36455	False	False	True	False	False	False
miR-140-3p__mir-140__0__-2__19M	hsa-mir-140	MI0000456	hsa-miR-140-3p	MIMAT0004597	0	-2	69933142	69933160	chr16	+	0	TACCACAGGGTAGAACCAC	TACCACAGGGTAGAACCAC	not reported	not reported	not reported	not reported	6.06969e-11	1.9111e-10	2.69034	2.07025	1.1133	0.89393	2.26087	0.960192	1.987	0.800938	False	False	False	True	False	False
miR-98-5p__mir-98__0__-1__21M	hsa-mir-98	MI0000100	hsa-miR-98-5p	MIMAT0000096	0	-1	53556300	53556320	chrX	-	0	TGAGGTAGTAAGTTGTATTGT	TGAGGTAGTAAGTTGTATTGT	not reported	not reported	not reported	not reported	1.05461e-07	2.33956e-07	38.5419	51.9158	22.6353	22.8998	21.3014	18.7909	50.757	19.9345	False	False	False	True	False	False
miR-224-5p__mir-224__+1__-2__22M	hsa-mir-224	MI0000301	hsa-miR-224-5p	MIMAT0000281	1	-2	151958630	151958651	chrX	-	0	CAAGTCACTAGTGGTTCCGTTT	CAAGTCACTAGTGGTTCCGTTT	not reported	not reported	not reported	not reported	2.63466e-08	6.2389e-08	4.77793	4.83062	27.8423	25.8887	4.04302	13.3484	4.79079	12.2489	False	False	True	False	False	False
miR-199b-3p__mir-199b__0__-6__16M	hsa-mir-199b	MI0000282	hsa-miR-199b-3p	MIMAT0004563	0	-6	128244751	128244766	chr9	-	0	ACAGTAGTCTGCACAT	ACAGTAGTCTGCACAT	not reported	not reported	not reported	not reported	0.000252791	0.000408431	0.653649	0.962484	6.41454	1.4276	0.522812	1.42955	0.586466	1.09905	False	False	True	False	False	False
miR-1287-5p__mir-1287__0__-2__20M	hsa-mir-1287	MI0006349	hsa-miR-1287-5p	MIMAT0005878	0	-2	98395273	98395292	chr10	-	0	TGCTGGATCAGTGGTTCGAG	TGCTGGATCAGTGGTTCGAG	not reported	not reported	not reported	not reported	0.000737458	0.00113671	10.1468	13.4418	20.5447	20.7773	9.38001	15.1472	11.967	15.3085	False	False	True	False	False	False
miR-27b-3p__mir-27b__-1__-2__20M	hsa-mir-27b	MI0000440	hsa-miR-27b-3p	MIMAT0000419	-1	-2	95085504	95085523	chr9	+	0	GTTCACAGTGGCTAAGTTCT	GTTCACAGTGGCTAAGTTCT	not reported	not reported	not reported	not reported	5.89546e-05	0.000101906	1.12463	0.398241	1.88129	2.09933	0.896064	1.52019	0.371239	1.64281	False	False	True	False	False	False
let-7i-5p__let-7i__0__-2__20M	hsa-let-7i	MI0000434	hsa-let-7i-5p	MIMAT0000415	0	-2	62603691	62603710	chr12	+	0	TGAGGTAGTAGTTTGTGCTG	TGAGGTAGTAGTTTGTGCTG	not reported	not reported	not reported	not reported	0.0302865	0.0385855	14.4518	21.8541	12.8691	13.1658	12.2445	10.8085	18.8668	11.2306	False	False	False	True	False	False
miR-93-5p__mir-93__0__-2__21M	hsa-mir-93	MI0000095	hsa-miR-93-5p	MIMAT0000093	0	-2	100093817	100093837	chr7	-	0	CAAAGTGCTGTTCGTGCAGGT	CAAAGTGCTGTTCGTGCAGGT	not reported	not reported	not reported	not reported	4.14051e-07	8.62002e-07	64.2838	75.5183	114.288	107.832	56.0828	96.163	61.9941	91.3094	False	False	True	False	False	False
miR-99b-3p__mir-99b__0__-5__17M	hsa-mir-99b	MI0000746	hsa-miR-99b-3p	MIMAT0004678	0	-5	51692656	51692672	chr19	+	0	CAAGCTCGTGTCTGTGG	CAAGCTCGTGTCTGTGG	not reported	not reported	not reported	not reported	9.02586e-05	0.000153711	0.980733	0.888276	1.76261	1.44435	0.800906	1.46419	0.678967	1.23111	False	False	True	False	False	False
miR-103a-3p__mir-103a-1__+2__-1__20M	hsa-mir-103a-1	MI0000109	hsa-miR-103a-3p	MIMAT0000101	2	-1	168560905	168560924	chr5	-	0	CAGCATTGTACAGGGCTATG	CAGCATTGTACAGGGCTATG	not reported	not reported	not reported	not reported	0.0047952	0.0067791	17.4731	25.8544	26.7646	26.8592	14.8127	22.874	23.5721	21.6087	False	False	False	False	True	False
miR-26a-5p__mir-26a-1__0__-4__18M	hsa-mir-26a-1	MI0000083	hsa-miR-26a-5p	MIMAT0000082	0	-4	37969413	37969430	chr3	+	0	TTCAAGTAATCCAGGATA	TTCAAGTAATCCAGGATA	not reported	not reported	not reported	not reported	0.000213677	0.000348134	29.902	27.4275	18.9848	19.6433	20.1926	15.1566	24.5917	14.0405	False	False	False	True	False	False
miR-301a-5p__mir-301a__0__0__22M	hsa-mir-301a	MI0000745	hsa-miR-301a-5p	MIMAT0022696	0	0	59151187	59151208	chr17	-	0	GCTCTGACTTTATTGCACTACT	GCTCTGACTTTATTGCACTACT	not reported	not reported	not reported	not reported	7.84213e-18	8.5798e-17	0.111502	0.159823	2.47441	2.05182	0.0948109	1.60551	0.148448	1.51084	False	False	True	False	False	False
let-7f-5p__let-7f-1__0__-3__19M	hsa-let-7f-1	MI0000067	hsa-let-7f-5p	MIMAT0000067	0	-3	94176353	94176371	chr9	+	0	TGAGGTAGTAGATTGTATA	TGAGGTAGTAGATTGTATA	not reported	not reported	not reported	not reported	3.32265e-13	1.54875e-12	489.12	553.169	95.1209	98.4539	223.447	60.9386	521.328	77.4782	False	False	False	True	False	False
miR-335-5p__mir-335__0__-1__22M	hsa-mir-335	MI0000816	hsa-miR-335-5p	MIMAT0000765	0	-1	130496126	130496147	chr7	+	0	TCAAGAGCAATAACGAAAAATG	TCAAGAGCAATAACGAAAAATG	not reported	not reported	not reported	not reported	3.33996e-06	6.4575e-06	8.63479	10.4057	4.87847	4.44126	6.12113	3.91454	9.61907	3.98448	False	False	False	True	False	False
miR-200a-5p__mir-200a__0__-1__21M	hsa-mir-200a	MI0000737	hsa-miR-200a-5p	MIMAT0001620	0	-1	1167878	1167898	chr1	+	0	CATCTTACCGGACAGTGCTGG	CATCTTACCGGACAGTGCTGG	not reported	not reported	not reported	not reported	4.53483e-21	9.60915e-20	33.2345	21.1662	134.836	118.335	21.586	100.357	20.6835	91.2402	False	False	True	False	False	False
miR-205-5p__mir-205__0__-3__19M	hsa-mir-205	MI0000285	hsa-miR-205-5p	MIMAT0000266	0	-3	209432166	209432184	chr1	+	0	TCCTTCATTCCACCGGAGT	TCCTTCATTCCACCGGAGT	not reported	not reported	not reported	not reported	1.45171e-07	3.16338e-07	0.600256	0.195891	9.50158	6.51924	0.38242	2.35467	0.156955	2.24748	False	False	True	False	False	False
miR-3127-5p__mir-3127__0__0__23M	hsa-mir-3127	MI0014144	hsa-miR-3127-5p	MIMAT0014990	0	0	96798288	96798310	chr2	+	0	ATCAGGGCTTGTGGAATGGGAAG	ATCAGGGCTTGTGGAATGGGAAG	not reported	not reported	not reported	not reported	0.000188214	0.000308147	1.83432	1.00832	1.80354	2.11484	0.99801	1.44144	0.991973	1.75531	False	False	True	False	False	False
miR-1301-3p__mir-1301__0__-2__22M	hsa-mir-1301	MI0003815	hsa-miR-1301-3p	MIMAT0005797	0	-2	25328653	25328674	chr2	-	0	TTGCAGCTGCCTGGGAGTGACT	TTGCAGCTGCCTGGGAGTGACT	not reported	not reported	not reported	not reported	2.1376e-12	8.51116e-12	1.43052	0.700058	3.10909	4.13425	0.97147	2.41477	0.638855	3.3132	False	False	True	False	False	False
miR-23a-3p__mir-23a__+2__+1__20M	hsa-mir-23a	MI0000079	hsa-miR-23a-3p	MIMAT0000078	2	1	13836594	13836613	chr19	-	0	CACATTGCCAGGGATTTCCA	CACATTGCCAGGGATTTCCA	not reported	not reported	not reported	not reported	0.00651369	0.0090558	0.680289	0.455526	2.25972	0.919454	0.55243	1.15304	0.44273	0.554811	False	False	True	False	False	False
miR-29b-3p__mir-29b-1__-1__-1__23M	hsa-mir-29b-1	MI0000105	hsa-miR-29b-3p	MIMAT0000100	-1	-1	130877468	130877490	chr7	-	0	CTAGCACCATTTGAAATCAGTGT	CTAGCACCATTTGAAATCAGTGT	not reported	not reported	not reported	not reported	1.36236e-05	2.48665e-05	1.27006	1.48129	2.74069	3.49965	1.0455	2.14174	1.30338	2.75898	False	False	True	False	False	False
miR-103a-3p__mir-103a-1__0__-3__20M	hsa-mir-103a-1	MI0000109	hsa-miR-103a-3p	MIMAT0000101	0	-3	168560907	168560926	chr5	-	0	AGCAGCATTGTACAGGGCTA	AGCAGCATTGTACAGGGCTA	not reported	not reported	not reported	not reported	0.00865519	0.0117712	27.1575	42.0114	22.5157	21.289	23.0098	19.6911	34.792	19.0634	False	False	False	True	False	False
miR-181a-3p__mir-181a-1__0__0__22M	hsa-mir-181a-1	MI0000289	hsa-miR-181a-3p	MIMAT0000270	0	0	198859069	198859090	chr1	-	0	ACCATCGACCGTTGATTGTACC	ACCATCGACCGTTGATTGTACC	not reported	not reported	not reported	not reported	3.07555e-06	5.9619e-06	110.378	169.263	186.386	208.646	102.04	158.679	162.134	178.82	True	False	False	False	False	False
miR-361-3p__mir-361__+1__0__22M	hsa-mir-361	MI0000760	hsa-miR-361-3p	MIMAT0004682	1	0	85903641	85903662	chrX	-	0	CCCCCAGGTGTGATTCTGATTT	CCCCCAGGTGTGATTCTGATTT	not reported	not reported	not reported	not reported	3.12106e-08	7.32486e-08	2.78288	1.84088	1.68974	2.34567	2.49226	1.42561	1.78171	2.07324	False	False	False	False	False	True
miR-217-5p__mir-217__0__0__23M	hsa-mir-217	MI0000293	hsa-miR-217-5p	MIMAT0000274	0	0	55983020	55983042	chr2	-	0	TACTGCATCAGGAACTGATTGGA	TACTGCATCAGGAACTGATTGGA	not reported	not reported	not reported	not reported	5.75725e-06	1.08856e-05	4.67289	6.56121	29.2254	19.8724	3.39213	8.56757	4.55417	10.4203	False	False	True	False	False	False
miR-148a-3p__mir-148a__0__-3__19M	hsa-mir-148a	MI0000253	hsa-miR-148a-3p	MIMAT0000243	0	-3	25949925	25949943	chr7	-	0	TCAGTGCACTACAGAACTT	TCAGTGCACTACAGAACTT	not reported	not reported	not reported	not reported	1.47076e-10	4.42308e-10	31.632	33.5911	118.954	110.63	20.6896	76.6873	28.0821	70.607	False	False	True	False	False	False
miR-363-3p__mir-363__0__-1__21M	hsa-mir-363	MI0000764	hsa-miR-363-3p	MIMAT0000707	0	-1	134169383	134169403	chrX	-	0	AATTGCACGGTATCCATCTGT	AATTGCACGGTATCCATCTGT	not reported	not reported	not reported	not reported	0.012399	0.0165874	2.407	3.99345	1.81405	3.31204	1.83773	1.24205	2.6514	1.74731	False	False	False	True	False	False
miR-362-5p__mir-362__0__-1__23M	hsa-mir-362	MI0000762	hsa-miR-362-5p	MIMAT0000705	0	-1	50008968	50008990	chrX	+	0	AATCCTTGGAACCTAGGTGTGAG	AATCCTTGGAACCTAGGTGTGAG	not reported	not reported	not reported	not reported	0.0015502	0.00231119	1.46828	2.43896	2.92585	3.59231	1.23131	2.22323	2.03786	2.59291	False	False	True	False	False	False
miR-30e-5p__mir-30e__0__-6__16M	hsa-mir-30e	MI0000749	hsa-miR-30e-5p	MIMAT0000692	0	-6	40754371	40754386	chr1	+	0	TGTAAACATCCTTGAC	TGTAAACATCCTTGAC	not reported	not reported	not reported	not reported	9.4945e-06	1.75646e-05	6.52322	7.09943	26.8917	12.8874	4.35995	11.8196	6.09993	10.5555	False	False	True	False	False	False
miR-20a-5p__mir-20a__0__-6__17M	hsa-mir-20a	MI0000076	hsa-miR-20a-5p	MIMAT0000075	0	-6	91351072	91351088	chr13	+	0	TAAAGTGCTTATAGTGC	TAAAGTGCTTATAGTGC	not reported	not reported	not reported	not reported	3.6747e-09	9.4153e-09	3.13658	4.25091	14.6925	18.4734	2.11092	8.36773	3.25172	11.0523	False	False	True	False	False	False
miR-183-5p__mir-183__+4__+1__19M	hsa-mir-183	MI0000273	hsa-miR-183-5p	MIMAT0000261	4	1	129774966	129774984	chr7	-	0	GCACTGGTAGAATTCACTG	GCACTGGTAGAATTCACTG	not reported	not reported	not reported	not reported	9.15635e-16	7.01332e-15	0.0531055	0.0991881	2.3323	1.40728	0.0473283	1.23774	0.0906918	1.09512	False	False	True	False	False	False
miR-25-3p__mir-25__0__+1__23M	hsa-mir-25	MI0000082	hsa-miR-25-3p	MIMAT0000081	0	1	100093570	100093592	chr7	-	0	CATTGCACTTGTCTCGGTCTGAC	CATTGCACTTGTCTCGGTCTGAC	not reported	not reported	not reported	not reported	1.77934e-11	5.98581e-11	0.706198	0.734176	2.21681	2.39923	0.561308	1.75349	0.666523	2.02901	False	False	True	False	False	False
miR-130b-5p__mir-130b__0__-2__19M	hsa-mir-130b	MI0000748	hsa-miR-130b-5p	MIMAT0004680	0	-2	21653316	21653334	chr22	+	0	ACTCTTTCCCTGTTGCACT	ACTCTTTCCCTGTTGCACT	not reported	not reported	not reported	not reported	8.60621e-13	3.66833e-12	0.728808	0.422253	2.68964	2.61338	0.572018	2.05622	0.374333	2.1321	False	False	True	False	False	False
miR-30a-3p__mir-30a__+2__-1__19M	hsa-mir-30a	MI0000088	hsa-miR-30a-3p	MIMAT0000088	2	-1	71403555	71403573	chr6	-	0	TTCAGTCGGATGTTTGCAG	TTCAGTCGGATGTTTGCAG	not reported	not reported	not reported	not reported	1.92972e-13	9.51184e-13	11.921	9.98069	4.16219	2.06062	8.76513	2.4624	8.94654	1.55315	False	False	False	True	False	False
miR-29b-3p__mir-29b-1__-1__-3__21M	hsa-mir-29b-1	MI0000105	hsa-miR-29b-3p	MIMAT0000100	-1	-3	130877470	130877490	chr7	-	0	CTAGCACCATTTGAAATCAGT	CTAGCACCATTTGAAATCAGT	not reported	not reported	not reported	not reported	0.0336397	0.0426218	21.6079	27.9536	20.4944	22.8714	14.3352	16.5486	26.7009	19.3589	False	False	False	False	True	False
let-7a-3p__let-7a-1__0__0__21M	hsa-let-7a-1	MI0000060	hsa-let-7a-3p	MIMAT0004481	0	0	94176013	94176033	chr9	+	0	CTATACAATCTACTGTCTTTC	CTATACAATCTACTGTCTTTC	not reported	not reported	not reported	not reported	9.69146e-07	1.95259e-06	20.2794	22.6613	10.5773	10.7044	12.0161	9.18223	21.7937	9.24515	False	False	False	True	False	False
miR-141-5p__mir-141__0__-5__17M	hsa-mir-141	MI0000457	hsa-miR-141-5p	MIMAT0004598	0	-5	6964113	6964129	chr12	+	0	CATCTTCCAGTACAGTG	CATCTTCCAGTACAGTG	not reported	not reported	not reported	not reported	7.25074e-14	3.97229e-13	0.831358	0.868525	3.58502	4.20618	0.632682	2.7718	0.604085	3.24585	False	False	True	False	False	False
miR-423-5p__mir-423__0__+1__24M	hsa-mir-423	MI0001445	hsa-miR-423-5p	MIMAT0004748	0	1	30117095	30117118	chr17	+	0	TGAGGGGCAGAGAGCGAGACTTTT	TGAGGGGCAGAGAGCGAGACTTTT	not reported	not reported	not reported	not reported	8.86727e-06	1.64455e-05	9.41727	4.03513	2.74251	2.74604	5.1852	2.28373	3.7086	2.40733	False	False	False	True	False	False
miR-29c-3p__mir-29c__0__-2__20M	hsa-mir-29c	MI0000735	hsa-miR-29c-3p	MIMAT0000681	0	-2	207801867	207801886	chr1	-	0	TAGCACCATTTGAAATCGGT	TAGCACCATTTGAAATCGGT	not reported	not reported	not reported	not reported	0.0273305	0.0349644	765.083	858.932	684.153	906.288	406.091	480.728	770.64	627.365	False	False	False	False	True	False
miR-30a-3p__mir-30a__0__-3__19M	hsa-mir-30a	MI0000088	hsa-miR-30a-3p	MIMAT0000088	0	-3	71403557	71403575	chr6	-	0	CTTTCAGTCGGATGTTTGC	CTTTCAGTCGGATGTTTGC	not reported	not reported	not reported	not reported	3.25414e-21	7.31586e-20	1896.34	1608.74	330.35	243.367	1386.97	226.035	1512.49	162.529	False	False	False	True	False	False
miR-194-5p__mir-194-1__0__-2__20M	hsa-mir-194-1	MI0000488	hsa-miR-194-5p	MIMAT0000460	0	-2	220118208	220118227	chr1	-	0	TGTAACAGCAACTCCATGTG	TGTAACAGCAACTCCATGTG	not reported	not reported	not reported	not reported	0.000760464	0.0011707	5.00405	2.22046	7.87938	1.9707	1.63275	2.35173	2.04345	1.06456	False	False	False	False	True	False
miR-3614-5p__mir-3614__0__-1__22M	hsa-mir-3614	MI0016004	hsa-miR-3614-5p	MIMAT0017992	0	-1	56891320	56891341	chr17	-	0	CCACTTGGATCTGAAGGCTGCC	CCACTTGGATCTGAAGGCTGCC	not reported	not reported	not reported	not reported	2.04982e-12	8.19706e-12	4.01234	4.08663	1.67869	1.48833	3.4698	1.36252	3.81081	1.25006	False	False	False	True	False	False
miR-141-3p__mir-141__-1__-1__22M	hsa-mir-141	MI0000457	hsa-miR-141-3p	MIMAT0000432	-1	-1	6964154	6964175	chr12	+	0	CTAACACTGTCTGGTAAAGATG	CTAACACTGTCTGGTAAAGATG	not reported	not reported	not reported	not reported	1.79357e-06	3.55915e-06	0.626888	1.13203	1.41891	1.75061	0.509256	1.21524	1.07589	1.41119	False	False	True	False	False	False
miR-22-3p__mir-22__+2__0__20M	hsa-mir-22	MI0000078	hsa-miR-22-3p	MIMAT0000077	2	0	1713914	1713933	chr17	-	0	GCTGCCAGTTGAAGAACTGT	GCTGCCAGTTGAAGAACTGT	not reported	not reported	not reported	not reported	2.38427e-07	5.10499e-07	35.5969	46.002	103.94	54.9123	28.5766	59.4215	45.3595	29.0053	False	False	False	False	True	False
miR-29b-3p__mir-29b-1__+2__0__21M	hsa-mir-29b-1	MI0000105	hsa-miR-29b-3p	MIMAT0000100	2	0	130877467	130877487	chr7	-	0	GCACCATTTGAAATCAGTGTT	GCACCATTTGAAATCAGTGTT	not reported	not reported	not reported	not reported	2.02389e-10	5.97445e-10	0.272529	0.209696	5.38768	3.16127	0.237233	1.93367	0.197568	1.18883	False	False	True	False	False	False
miR-210-3p__mir-210__0__-1__21M	hsa-mir-210	MI0000286	hsa-miR-210-3p	MIMAT0000267	0	-1	568113	568133	chr11	-	0	CTGTGCGTGTGACAGCGGCTG	CTGTGCGTGTGACAGCGGCTG	not reported	not reported	not reported	not reported	1.4575e-23	8.47507e-22	3.13989	0.559767	86.7735	72.2032	1.48346	44.0427	0.509031	43.373	False	False	True	False	False	False
miR-1307-3p__mir-1307__+1__+2__23M	hsa-mir-1307	MI0006444	hsa-miR-1307-3p	MIMAT0005951	1	2	103394299	103394321	chr10	-	0	CTCGGCGTGGCGTCGGTCGTGGT	CTCGGCGTGGCGTCGGTCGTGGT	not reported	not reported	not reported	not reported	2.84059e-07	6.02604e-07	36.5708	11.6618	24.9142	34.4721	13.4913	19.7031	10.5897	26.4805	False	False	True	False	False	False
miR-484__mir-484__0__0__22M	hsa-mir-484	MI0002468	hsa-miR-484	MIMAT0002174	0	0	15643301	15643322	chr16	+	0	TCAGGCTCAGTCCCCTCCCGAT	TCAGGCTCAGTCCCCTCCCGAT	not reported	not reported	not reported	not reported	2.68692e-07	5.71318e-07	30.3559	15.5364	27.8577	33.6017	18.5989	24.4111	15.3401	29.4958	False	False	True	False	False	False
let-7d-3p__let-7d__0__-2__20M	hsa-let-7d	MI0000065	hsa-let-7d-3p	MIMAT0004484	0	-2	94178895	94178914	chr9	+	0	CTATACGACCTGCTGCCTTT	CTATACGACCTGCTGCCTTT	not reported	not reported	not reported	not reported	1.48397e-09	3.99082e-09	229.469	65.1028	46.1238	46.392	97.7426	34.3945	64.6548	32.3263	False	False	False	True	False	False
miR-217-5p__mir-217__0__-1__22M	hsa-mir-217	MI0000293	hsa-miR-217-5p	MIMAT0000274	0	-1	55983021	55983042	chr2	-	0	TACTGCATCAGGAACTGATTGG	TACTGCATCAGGAACTGATTGG	not reported	not reported	not reported	not reported	0.027618	0.03532	3.18349	5.20841	9.89063	8.86488	2.26881	4.28089	3.63828	4.76148	False	False	True	False	False	False
miR-375-3p__mir-375__+1__-1__20M	hsa-mir-375	MI0000783	hsa-miR-375-3p	MIMAT0000728	1	-1	219001649	219001668	chr2	-	0	TTGTTCGTTCGGCTCGCGTG	TTGTTCGTTCGGCTCGCGTG	not reported	not reported	not reported	not reported	1.89849e-05	3.42286e-05	119.629	33.5873	217.657	224.062	39.8864	79.5925	30.4085	80.0146	False	False	True	False	False	False
miR-193a-3p__mir-193a__0__0__22M	hsa-mir-193a	MI0000487	hsa-miR-193a-3p	MIMAT0000459	0	0	31560050	31560071	chr17	+	0	AACTGGCCTACAAAGTCCCAGT	AACTGGCCTACAAAGTCCCAGT	not reported	not reported	not reported	not reported	0.00014065	0.000234121	0.975068	1.97727	2.05969	2.16225	0.8293	1.64692	1.88856	1.77925	False	False	False	False	True	False
miR-542-3p__mir-542__-1__-3__20M	hsa-mir-542	MI0003686	hsa-miR-542-3p	MIMAT0003389	-1	-3	134541367	134541386	chrX	-	0	TTGTGACAGATTGATAACTG	TTGTGACAGATTGATAACTG	not reported	not reported	not reported	not reported	5.21666e-07	1.07632e-06	1.70849	2.36283	4.75802	4.20414	1.26825	3.38849	1.90849	2.83172	False	False	True	False	False	False
let-7d-5p__let-7d__0__-4__18M	hsa-let-7d	MI0000065	hsa-let-7d-5p	MIMAT0000065	0	-4	94178841	94178858	chr9	+	0	AGAGGTAGTAGGTTGCAT	AGAGGTAGTAGGTTGCAT	not reported	not reported	not reported	not reported	0.0356857	0.0451057	3.22755	3.12465	5.46058	8.62496	2.66747	2.85466	2.93592	4.81531	True	False	False	False	False	False
miR-338-3p__mir-338__0__0__22M	hsa-mir-338	MI0000814	hsa-miR-338-3p	MIMAT0000763	0	0	81125887	81125908	chr17	-	0	TCCAGCATCAGTGATTTTGTTG	TCCAGCATCAGTGATTTTGTTG	not reported	not reported	not reported	not reported	0.0154381	0.0204528	327.483	451.628	341.786	246.259	208.594	173.734	431.546	156.465	False	False	False	True	False	False
miR-9-5p__mir-9-1__0__-4__19M	hsa-mir-9-1	MI0000466	hsa-miR-9-5p	MIMAT0000441	0	-4	156420396	156420414	chr1	-	0	TCTTTGGTTATCTAGCTGT	TCTTTGGTTATCTAGCTGT	not reported	not reported	not reported	not reported	4.75738e-20	8.08316e-19	1.22206	0.654395	104.029	44.4548	0.726435	16.5266	0.518161	16.5579	False	False	True	False	False	False
miR-21-3p__mir-21__0__+2__23M	hsa-mir-21	MI0000077	hsa-miR-21-3p	MIMAT0004494	0	2	59841311	59841333	chr17	+	0	CAACACCAGTCGATGGGCTGTCT	CAACACCAGTCGATGGGCTGTCT	not reported	not reported	not reported	not reported	3.41231e-25	9.60095e-23	16.6865	17.0272	110.304	95.1275	13.8082	86.9288	16.2238	71.133	False	False	True	False	False	False
miR-151b__mir-151b__-1__+2__21M	hsa-mir-151b	MI0003772	hsa-miR-151b	MIMAT0010214	-1	2	100109436	100109456	chr14	-	0	CTCGAGGAGCTCACAGTCTAG	CTCGAGGAGCTCACAGTCTAG	not reported	not reported	not reported	not reported	2.72853e-16	2.318e-15	1.67393	0.601111	7.17283	7.96178	1.24879	5.26647	0.516054	6.11174	False	False	True	False	False	False
miR-451a__mir-451a__0__-1__21M	hsa-mir-451a	MI0001729	hsa-miR-451a	MIMAT0001631	0	-1	28861404	28861424	chr17	-	0	AAACCGTTACCATTACTGAGT	AAACCGTTACCATTACTGAGT	not reported	not reported	not reported	not reported	5.15002e-13	2.30718e-12	1745.81	2778.51	254.685	346.138	828.983	140.656	1907.89	159.925	False	False	False	True	False	False
let-7f-5p__let-7f-1__+5__+4__21M	hsa-let-7f-1	MI0000067	hsa-let-7f-5p	MIMAT0000067	5	4	94176358	94176378	chr9	+	0	TAGTAGATTGTATAGTTGTGG	TAGTAGATTGTATAGTTGTGG	not reported	not reported	not reported	not reported	0.00433986	0.0061685	1.7817	1.19479	2.92572	1.49373	1.40674	2.04624	1.1085	1.27755	False	False	True	False	False	False
miR-101-3p__mir-101-1__0__-4__17M	hsa-mir-101-1	MI0000103	hsa-miR-101-3p	MIMAT0000099	0	-4	65058446	65058462	chr1	-	0	TACAGTACTGTGATAAC	TACAGTACTGTGATAAC	not reported	not reported	not reported	not reported	2.22424e-05	3.97133e-05	70.2485	90.4994	19.1914	19.896	23.3077	14.4734	50.4226	15.3929	False	False	False	True	False	False
miR-16-5p__mir-16-1__0__-1__21M	hsa-mir-16-1	MI0000070	hsa-miR-16-5p	MIMAT0000069	0	-1	50049028	50049048	chr13	-	0	TAGCAGCACGTAAATATTGGC	TAGCAGCACGTAAATATTGGC	not reported	not reported	not reported	not reported	1.23445e-06	2.46823e-06	37.9111	52.4762	21.6977	24.3364	25.2073	19.4285	38.9756	22.136	False	False	False	True	False	False
miR-21-5p__mir-21__-1__0__23M	hsa-mir-21	MI0000077	hsa-miR-21-5p	MIMAT0000076	-1	0	59841272	59841294	chr17	+	0	GTAGCTTATCAGACTGATGTTGA	GTAGCTTATCAGACTGATGTTGA	not reported	not reported	not reported	not reported	1.38179e-23	8.35189e-22	27.7631	31.484	175.667	196.043	14.3036	142.713	27.4216	158.708	False	False	True	False	False	False
miR-542-3p__mir-542__0__-3__19M	hsa-mir-542	MI0003686	hsa-miR-542-3p	MIMAT0003389	0	-3	134541367	134541385	chrX	-	0	TGTGACAGATTGATAACTG	TGTGACAGATTGATAACTG	not reported	not reported	not reported	not reported	6.39742e-07	1.31041e-06	2.7729	3.42518	8.95475	10.107	1.92813	5.69967	2.89829	5.95854	False	False	True	False	False	False
miR-22-3p__mir-22__-1__0__23M	hsa-mir-22	MI0000078	hsa-miR-22-3p	MIMAT0000077	-1	0	1713914	1713936	chr17	-	0	AAAGCTGCCAGTTGAAGAACTGT	AAAGCTGCCAGTTGAAGAACTGT	not reported	not reported	not reported	not reported	0.0107409	0.0144796	12.2317	17.4325	18.0423	17.904	9.49522	16.076	17.1325	16.3795	False	False	False	False	True	False
miR-16-2-3p__mir-16-2__-1__-1__22M	hsa-mir-16-2	MI0000115	hsa-miR-16-2-3p	MIMAT0004518	-1	-1	160404796	160404817	chr3	+	0	ACCAATATTACTGTGCTGCTTT	ACCAATATTACTGTGCTGCTTT	not reported	not reported	not reported	not reported	3.72508e-06	7.17949e-06	1.31788	1.24411	2.70717	2.87032	1.05497	2.27603	1.14989	2.42107	False	False	True	False	False	False
miR-320a-3p__mir-320a__+2__+1__21M	hsa-mir-320a	MI0000542	hsa-miR-320a-3p	MIMAT0000510	2	1	22244974	22244994	chr8	-	0	AAGCTGGGTTGAGAGGGCGAA	AAGCTGGGTTGAGAGGGCGAA	not reported	not reported	not reported	not reported	1.84715e-06	3.6576e-06	1.09742	1.11098	2.53827	2.36211	0.869547	1.90422	1.07668	2.02516	False	False	True	False	False	False
miR-200c-3p__mir-200c__0__-7__16M	hsa-mir-200c	MI0000650	hsa-miR-200c-3p	MIMAT0000617	0	-7	6963742	6963757	chr12	+	0	TAATACTGCCGGGTAA	TAATACTGCCGGGTAA	not reported	not reported	not reported	not reported	0.0148614	0.0197385	20.002	15.5526	62.1065	31.9558	17.9353	25.3193	14.0531	22.5936	False	False	True	False	False	False
miR-30c-5p__mir-30c-1__0__-3__20M	hsa-mir-30c-1	MI0000736	hsa-miR-30c-5p	MIMAT0000244	0	-3	40757300	40757319	chr1	+	0	TGTAAACATCCTACACTCTC	TGTAAACATCCTACACTCTC	not reported	not reported	not reported	not reported	0.00165663	0.00245993	26.8398	23.4326	21.9134	17.1074	21.8457	15.3652	21.996	12.892	False	False	False	True	False	False
miR-99a-5p__mir-99a__0__-2__20M	hsa-mir-99a	MI0000101	hsa-miR-99a-5p	MIMAT0000097	0	-2	16539101	16539120	chr21	+	0	AACCCGTAGATCCGATCTTG	AACCCGTAGATCCGATCTTG	not reported	not reported	not reported	not reported	4.06905e-10	1.1585e-09	46.3383	48.7172	21.369	21.3449	35.3785	16.3843	48.0291	15.9439	False	False	False	True	False	False
miR-1260b__mir-1260b__0__-1__18M	hsa-mir-1260b	MI0014197	hsa-miR-1260b	MIMAT0015041	0	-1	96341447	96341464	chr11	+	0	ATCCCACCACTGCCACCA	ATCCCACCACTGCCACCA	not reported	not reported	not reported	not reported	0.00107968	0.0016308	3.6105	3.42683	1.84556	1.95366	2.41722	1.23531	2.56179	1.27112	False	False	False	True	False	False
miR-93-5p__mir-93__+1__0__22M	hsa-mir-93	MI0000095	hsa-miR-93-5p	MIMAT0000093	1	0	100093815	100093836	chr7	-	0	AAAGTGCTGTTCGTGCAGGTAG	AAAGTGCTGTTCGTGCAGGTAG	not reported	not reported	not reported	not reported	0.000314095	0.000502415	10.2448	14.0719	15.9196	17.9093	9.30848	13.0591	13.3044	15.7796	True	False	False	False	False	False
miR-130b-3p__mir-130b__0__0__22M	hsa-mir-130b	MI0000748	hsa-miR-130b-3p	MIMAT0000691	0	0	21653354	21653375	chr22	+	0	CAGTGCAATGATGAAAGGGCAT	CAGTGCAATGATGAAAGGGCAT	not reported	not reported	not reported	not reported	1.83117e-19	2.74452e-18	3.5101	4.84592	14.4987	14.2838	3.07131	10.4232	4.43657	11.9965	False	False	True	False	False	False
miR-139-5p__mir-139__0__0__23M	hsa-mir-139	MI0000261	hsa-miR-139-5p	MIMAT0000250	0	0	72615102	72615124	chr11	-	0	TCTACAGTGCACGTGTCTCCAGT	TCTACAGTGCACGTGTCTCCAGT	not reported	not reported	not reported	not reported	3.29171e-09	8.48709e-09	29.2958	11.8671	8.15835	8.06331	15.6951	5.40705	11.7256	6.361	False	False	False	True	False	False
miR-93-5p__mir-93__+1__-3__19M	hsa-mir-93	MI0000095	hsa-miR-93-5p	MIMAT0000093	1	-3	100093818	100093836	chr7	-	0	AAAGTGCTGTTCGTGCAGG	AAAGTGCTGTTCGTGCAGG	not reported	not reported	not reported	not reported	6.95876e-07	1.42144e-06	0.485815	0.574288	1.34436	1.12757	0.428191	1.09918	0.514225	0.902603	False	False	True	False	False	False
miR-30e-5p__mir-30e__0__+1__23M	hsa-mir-30e	MI0000749	hsa-miR-30e-5p	MIMAT0000692	0	1	40754371	40754393	chr1	+	0	TGTAAACATCCTTGACTGGAAGC	TGTAAACATCCTTGACTGGAAGC	not reported	not reported	not reported	not reported	6.44909e-14	3.60269e-13	307.112	464.417	1096.01	1254.08	225.947	801.498	458.363	959.604	False	False	True	False	False	False
miR-142-3p__mir-142__+1__-1__21M	hsa-mir-142	MI0000458	hsa-miR-142-3p	MIMAT0000434	1	-1	58331246	58331266	chr17	-	0	GTAGTGTTTCCTACTTTATGG	GTAGTGTTTCCTACTTTATGG	not reported	not reported	not reported	not reported	2.18106e-13	1.05949e-12	312.728	381.628	1341.37	1214.82	164.565	892.705	368.246	943.016	False	False	True	False	False	False
miR-151a-3p__mir-151a__-2__-1__22M	hsa-mir-151a	MI0000809	hsa-miR-151a-3p	MIMAT0000757	-2	-1	140732588	140732609	chr8	-	0	TACTAGACTGAAGCTCCTTGAG	TACTAGACTGAAGCTCCTTGAG	not reported	not reported	not reported	not reported	1.37819e-09	3.71719e-09	44.4744	58.0128	82.4922	90.0092	35.1031	73.6176	57.1764	80.5643	False	False	True	False	False	False
miR-375-3p__mir-375__+1__-4__17M	hsa-mir-375	MI0000783	hsa-miR-375-3p	MIMAT0000728	1	-4	219001652	219001668	chr2	-	0	TTGTTCGTTCGGCTCGC	TTGTTCGTTCGGCTCGC	not reported	not reported	not reported	not reported	4.82401e-09	1.2199e-08	4.33691	2.23861	25.826	23.7542	2.44378	8.69512	1.90677	8.16721	False	False	True	False	False	False
miR-451a__mir-451a__0__+3__25M	hsa-mir-451a	MI0001729	hsa-miR-451a	MIMAT0001631	0	3	28861400	28861424	chr17	-	0	AAACCGTTACCATTACTGAGTTTAG	AAACCGTTACCATTACTGAGTTTAG	not reported	not reported	not reported	not reported	3.32675e-05	5.85476e-05	6.53801	15.8619	3.56004	3.26767	3.57281	1.58176	10.2761	1.71095	False	False	False	True	False	False
miR-1307-3p__mir-1307__0__-2__20M	hsa-mir-1307	MI0006444	hsa-miR-1307-3p	MIMAT0005951	0	-2	103394303	103394322	chr10	-	0	ACTCGGCGTGGCGTCGGTCG	ACTCGGCGTGGCGTCGGTCG	not reported	not reported	not reported	not reported	1.92015e-10	5.69556e-10	5.16398	2.42847	9.46121	11.0119	2.79441	7.07219	2.38312	8.76384	False	False	True	False	False	False
miR-1266-5p__mir-1266__0__-6__17M	hsa-mir-1266	MI0006403	hsa-miR-1266-5p	MIMAT0005920	0	-6	52277172	52277188	chr15	-	0	CCTCAGGGCTGTAGAAC	CCTCAGGGCTGTAGAAC	not reported	not reported	not reported	not reported	8.73025e-06	1.62077e-05	0.398143	0.320066	1.71655	1.72147	0.333674	1.1155	0.269515	1.28615	False	False	True	False	False	False
miR-769-5p__mir-769__0__-1__21M	hsa-mir-769	MI0003834	hsa-miR-769-5p	MIMAT0003886	0	-1	46018961	46018981	chr19	+	0	TGAGACCTCTGGGTTCTGAGC	TGAGACCTCTGGGTTCTGAGC	not reported	not reported	not reported	not reported	3.46081e-08	8.08353e-08	9.87836	11.5898	6.05983	5.71492	8.73992	4.82657	10.7239	4.83947	False	False	False	True	False	False
miR-127-5p__mir-127__0__+1__23M	hsa-mir-127	MI0000472	hsa-miR-127-5p	MIMAT0004604	0	1	100883001	100883023	chr14	+	0	CTGAAGCTCAGAGGGCTCTGATT	CTGAAGCTCAGAGGGCTCTGATT	not reported	not reported	not reported	not reported	1.36059e-21	3.43595e-20	0.241891	0.201321	10.6945	6.58356	0.196967	4.75485	0.191774	4.58525	False	False	True	False	False	False
miR-21-5p__mir-21__+5__+1__18M	hsa-mir-21	MI0000077	hsa-miR-21-5p	MIMAT0000076	5	1	59841278	59841295	chr17	+	0	TATCAGACTGATGTTGAC	TATCAGACTGATGTTGAC	not reported	not reported	not reported	not reported	2.27263e-21	5.26992e-20	0.175249	0.109885	15.5732	11.5017	0.14607	5.31794	0.0994155	5.01535	False	False	True	False	False	False
miR-92a-3p__mir-92a-1__0__-5__17M	hsa-mir-92a-1	MI0000093	hsa-miR-92a-3p	MIMAT0000092	0	-5	91351361	91351377	chr13	+	0	TATTGCACTTGTCCCGG	TATTGCACTTGTCCCGG	not reported	not reported	not reported	not reported	0.000306905	0.0004919	38.8465	30.2574	56.6391	62.62	22.4909	36.7546	18.6691	47.0913	False	False	True	False	False	False
miR-29c-5p__mir-29c__0__0__22M	hsa-mir-29c	MI0000735	hsa-miR-29c-5p	MIMAT0004673	0	0	207801903	207801924	chr1	-	0	TGACCGATTTCTCCTGGTGTTC	TGACCGATTTCTCCTGGTGTTC	not reported	not reported	not reported	not reported	0.0361279	0.0455709	1.16016	1.17685	1.68429	1.91267	1.01365	1.38551	1.04246	1.63852	False	False	True	False	False	False
miR-29b-2-5p__mir-29b-2__0__+1__23M	hsa-mir-29b-2	MI0000107	hsa-miR-29b-2-5p	MIMAT0004515	0	1	207802491	207802513	chr1	-	0	CTGGTTTCACATGGTGGCTTAGA	CTGGTTTCACATGGTGGCTTAGA	not reported	not reported	not reported	not reported	0.0227878	0.0293976	9.20828	9.15117	14.655	14.582	8.08055	11.0529	8.9971	11.895	False	False	True	False	False	False
miR-17-5p__mir-17__+3__0__20M	hsa-mir-17	MI0000071	hsa-miR-17-5p	MIMAT0000070	3	0	91350621	91350640	chr13	+	0	AGTGCTTACAGTGCAGGTAG	AGTGCTTACAGTGCAGGTAG	not reported	not reported	not reported	not reported	2.95103e-19	4.23363e-18	0.0871774	0.163225	3.05324	1.97006	0.0800791	1.45165	0.151516	0.706288	False	False	True	False	False	False
miR-455-3p__mir-455__0__+1__22M	hsa-mir-455	MI0003513	hsa-miR-455-3p	MIMAT0004784	0	1	114209487	114209508	chr9	+	0	GCAGTCCATGGGCATATACACT	GCAGTCCATGGGCATATACACT	not reported	not reported	not reported	not reported	1.20377e-10	3.64991e-10	27.5775	3.34757	27.516	26.1763	6.59763	19.3189	3.15025	21.0553	False	False	True	False	False	False
miR-29a-3p__mir-29a__-1__0__23M	hsa-mir-29a	MI0000087	hsa-miR-29a-3p	MIMAT0000086	-1	0	130876748	130876770	chr7	-	0	CTAGCACCATCTGAAATCGGTTA	CTAGCACCATCTGAAATCGGTTA	not reported	not reported	not reported	not reported	2.17739e-08	5.20626e-08	21.2354	26.0771	47.1175	46.0614	18.6088	37.4906	24.4299	39.2914	False	False	True	False	False	False
miR-151a-5p__mir-151a__0__+2__23M	hsa-mir-151a	MI0000809	hsa-miR-151a-5p	MIMAT0004697	0	2	140732621	140732643	chr8	-	0	TCGAGGAGCTCACAGTCTAGTAT	TCGAGGAGCTCACAGTCTAGTAT	not reported	not reported	not reported	not reported	4.08591e-14	2.39123e-13	1.0591	1.46963	3.81541	5.13938	0.916327	3.03143	1.39851	4.01891	False	False	True	False	False	False
miR-181d-5p__mir-181d__0__-1__22M	hsa-mir-181d	MI0003139	hsa-miR-181d-5p	MIMAT0002821	0	-1	13874910	13874931	chr19	+	0	AACATTCATTGTTGTCGGTGGG	AACATTCATTGTTGTCGGTGGG	not reported	not reported	not reported	not reported	0.000722583	0.00111565	7.01293	11.1544	11.5466	14.6322	5.99313	9.17944	10.6761	11.1995	True	False	False	False	False	False
miR-22-3p__mir-22__+1__-5__16M	hsa-mir-22	MI0000078	hsa-miR-22-3p	MIMAT0000077	1	-5	1713919	1713934	chr17	-	0	AGCTGCCAGTTGAAGA	AGCTGCCAGTTGAAGA	not reported	not reported	not reported	not reported	0.00073642	0.00113558	1.06174	1.09786	5.12276	1.17831	0.835922	1.67414	0.823377	0.88047	False	False	True	False	False	False
miR-28-5p__mir-28__0__0__22M	hsa-mir-28	MI0000086	hsa-miR-28-5p	MIMAT0000085	0	0	188688794	188688815	chr3	+	0	AAGGAGCTCACAGTCTATTGAG	AAGGAGCTCACAGTCTATTGAG	not reported	not reported	not reported	not reported	0.00386636	0.00551675	21.0174	25.8504	28.0298	32.4888	16.884	25.2147	24.6916	29.6772	False	False	True	False	False	False
let-7f-1-3p__let-7f-1__0__-1__21M	hsa-let-7f-1	MI0000067	hsa-let-7f-1-3p	MIMAT0004486	0	-1	94176409	94176429	chr9	+	0	CTATACAATCTATTGCCTTCC	CTATACAATCTATTGCCTTCC	not reported	not reported	not reported	not reported	0.0352107	0.0445358	2.1649	2.61906	1.81493	1.84437	1.80109	1.61561	2.53234	1.69243	False	False	False	True	False	False
miR-144-5p__mir-144__0__-2__20M	hsa-mir-144	MI0000460	hsa-miR-144-5p	MIMAT0004600	0	-2	28861585	28861604	chr17	-	0	GGATATCATCATATACTGTA	GGATATCATCATATACTGTA	not reported	not reported	not reported	not reported	9.18052e-14	4.87732e-13	21.3026	28.6543	2.95472	2.09777	11.8713	1.71169	20.2145	1.39014	False	False	False	True	False	False
miR-15a-5p__mir-15a__0__-2__20M	hsa-mir-15a	MI0000069	hsa-miR-15a-5p	MIMAT0000068	0	-2	50049169	50049188	chr13	-	0	TAGCAGCACATAATGGTTTG	TAGCAGCACATAATGGTTTG	not reported	not reported	not reported	not reported	0.0249166	0.0319762	8.44576	11.1425	6.75608	8.86447	6.07353	5.98862	9.80176	7.4914	False	False	False	True	False	False
miR-33a-5p__mir-33a__0__-1__20M	hsa-mir-33a	MI0000091	hsa-miR-33a-5p	MIMAT0000091	0	-1	41900949	41900968	chr22	+	0	GTGCATTGTAGTTGCATTGC	GTGCATTGTAGTTGCATTGC	not reported	not reported	not reported	not reported	6.61321e-18	7.34425e-17	1.84413	2.04194	12.4701	11.3899	1.42236	7.69702	1.99606	8.54112	False	False	True	False	False	False
miR-382-5p__mir-382__0__0__22M	hsa-mir-382	MI0000790	hsa-miR-382-5p	MIMAT0000737	0	0	101054316	101054337	chr14	+	0	GAAGTTGTTCGTGGTGGATTCG	GAAGTTGTTCGTGGTGGATTCG	not reported	not reported	not reported	not reported	0.000367129	0.000583954	2.71827	2.52637	7.96195	6.45549	2.17557	4.37685	2.26542	3.99059	False	False	True	False	False	False
let-7a-5p__let-7a-1__0__+2__24M	hsa-let-7a-1	MI0000060	hsa-let-7a-5p	MIMAT0000062	0	2	94175962	94175985	chr9	+	0	TGAGGTAGTAGGTTGTATAGTTTT	TGAGGTAGTAGGTTGTATAGTTTT	not reported	not reported	not reported	not reported	2.78903e-06	5.44082e-06	2.75633	2.63516	1.6105	1.8939	2.44444	1.35227	2.32332	1.58893	False	False	False	True	False	False
miR-151a-3p__mir-151a__-1__-3__19M	hsa-mir-151a	MI0000809	hsa-miR-151a-3p	MIMAT0000757	-1	-3	140732590	140732608	chr8	-	0	ACTAGACTGAAGCTCCTTG	ACTAGACTGAAGCTCCTTG	not reported	not reported	not reported	not reported	2.70914e-08	6.40705e-08	0.880001	0.786339	2.45173	2.50724	0.641769	1.8557	0.626954	1.96157	False	False	True	False	False	False
miR-152-3p__mir-152__0__0__21M	hsa-mir-152	MI0000462	hsa-miR-152-3p	MIMAT0000438	0	0	48037174	48037194	chr17	-	0	TCAGTGCATGACAGAACTTGG	TCAGTGCATGACAGAACTTGG	not reported	not reported	not reported	not reported	1.9245e-05	3.46128e-05	238.797	311.796	168.836	172.475	149.733	141.885	291.604	151.746	False	False	False	True	False	False
miR-429__mir-429__0__-1__21M	hsa-mir-429	MI0001641	hsa-miR-429	MIMAT0001536	0	-1	1169055	1169075	chr1	+	0	TAATACTGTCTGGTAAAACCG	TAATACTGTCTGGTAAAACCG	not reported	not reported	not reported	not reported	1.03349e-07	2.29685e-07	13.8997	15.4225	33.2038	33.9287	9.28419	24.0576	14.9464	27.1508	False	False	True	False	False	False
miR-186-5p__mir-186__0__-1__21M	hsa-mir-186	MI0000483	hsa-miR-186-5p	MIMAT0000456	0	-1	71067682	71067702	chr1	-	0	CAAAGAATTCTCCTTTTGGGC	CAAAGAATTCTCCTTTTGGGC	not reported	not reported	not reported	not reported	0.00711705	0.00980956	42.7857	53.7762	37.1988	44.2806	33.8311	32.9909	49.0984	39.3764	False	False	False	True	False	False
miR-375-3p__mir-375__-1__-7__16M	hsa-mir-375	MI0000783	hsa-miR-375-3p	MIMAT0000728	-1	-7	219001655	219001670	chr2	-	0	TTTTGTTCGTTCGGCT	TTTTGTTCGTTCGGCT	not reported	not reported	not reported	not reported	1.0057e-11	3.49814e-11	0.30436	0.385241	5.30475	3.2474	0.217058	1.61689	0.354003	1.63909	False	False	True	False	False	False
miR-9-5p__mir-9-1__0__-3__20M	hsa-mir-9-1	MI0000466	hsa-miR-9-5p	MIMAT0000441	0	-3	156420395	156420414	chr1	-	0	TCTTTGGTTATCTAGCTGTA	TCTTTGGTTATCTAGCTGTA	not reported	not reported	not reported	not reported	1.13294e-15	8.55973e-15	0.425973	0.30539	10.2397	7.54924	0.272004	3.2382	0.294224	3.24403	False	False	True	False	False	False
miR-30a-5p__mir-30a__+1__-3__18M	hsa-mir-30a	MI0000088	hsa-miR-30a-5p	MIMAT0000087	1	-3	71403598	71403615	chr6	-	0	GTAAACATCCTCGACTGG	GTAAACATCCTCGACTGG	not reported	not reported	not reported	not reported	1.41057e-06	2.81428e-06	5.08607	5.82147	2.74658	3.02952	3.91568	1.78676	5.52381	1.93369	False	False	False	True	False	False
miR-127-5p__mir-127__0__-2__20M	hsa-mir-127	MI0000472	hsa-miR-127-5p	MIMAT0004604	0	-2	100883001	100883020	chr14	+	0	CTGAAGCTCAGAGGGCTCTG	CTGAAGCTCAGAGGGCTCTG	not reported	not reported	not reported	not reported	9.64473e-20	1.54609e-18	0.366212	0.352365	7.45781	4.06311	0.273405	3.72984	0.333505	2.68853	False	False	True	False	False	False
miR-20a-5p__mir-20a__0__+1__24M	hsa-mir-20a	MI0000076	hsa-miR-20a-5p	MIMAT0000075	0	1	91351072	91351095	chr13	+	0	TAAAGTGCTTATAGTGCAGGTAGT	TAAAGTGCTTATAGTGCAGGTAGT	not reported	not reported	not reported	not reported	2.58534e-09	6.71278e-09	0.490429	0.602596	1.97739	2.15254	0.408145	1.43463	0.565092	1.67613	False	False	True	False	False	False
miR-151a-5p__mir-151a__-1__0__22M	hsa-mir-151a	MI0000809	hsa-miR-151a-5p	MIMAT0004697	-1	0	140732623	140732644	chr8	-	0	CTCGAGGAGCTCACAGTCTAGT	CTCGAGGAGCTCACAGTCTAGT	not reported	not reported	not reported	not reported	3.19079e-19	4.53168e-18	12.7584	6.59957	58.9244	65.8884	8.01197	40.4223	6.39587	50.6595	False	False	True	False	False	False
miR-181a-5p__mir-181a-1__+1__-2__20M	hsa-mir-181a-1	MI0000289	hsa-miR-181a-5p	MIMAT0000256	1	-2	198859110	198859129	chr1	-	0	ACATTCAACGCTGTCGGTGA	ACATTCAACGCTGTCGGTGA	not reported	not reported	not reported	not reported	1.53554e-08	3.71736e-08	4.58051	3.10925	2.5322	1.62676	3.4374	1.62231	2.87477	1.09735	False	False	False	True	False	False
miR-324-5p__mir-324__0__+1__23M	hsa-mir-324	MI0000813	hsa-miR-324-5p	MIMAT0000761	0	1	7223342	7223364	chr17	-	0	CGCATCCCCTAGGGCATTGGTGT	CGCATCCCCTAGGGCATTGGTGT	not reported	not reported	not reported	not reported	5.39232e-15	3.6413e-14	2.34233	2.12261	8.8405	10.5631	1.8825	6.64468	1.9852	8.21958	False	False	True	False	False	False
miR-340-3p__mir-340__0__0__22M	hsa-mir-340	MI0000802	hsa-miR-340-3p	MIMAT0000750	0	0	180015319	180015340	chr5	-	0	TCCGTCTCAGTTACTTTATAGC	TCCGTCTCAGTTACTTTATAGC	not reported	not reported	not reported	not reported	0.0100126	0.0135325	1.62409	2.79752	2.12642	2.87738	1.40099	1.84108	2.53968	2.41409	False	False	False	False	True	False
miR-1301-3p__mir-1301__0__-4__20M	hsa-mir-1301	MI0003815	hsa-miR-1301-3p	MIMAT0005797	0	-4	25328655	25328674	chr2	-	0	TTGCAGCTGCCTGGGAGTGA	TTGCAGCTGCCTGGGAGTGA	not reported	not reported	not reported	not reported	2.30955e-07	4.95363e-07	1.01021	0.272266	1.75776	2.27086	0.623938	1.31452	0.237522	1.6043	False	False	True	False	False	False
miR-455-3p__mir-455__0__-1__20M	hsa-mir-455	MI0003513	hsa-miR-455-3p	MIMAT0004784	0	-1	114209487	114209506	chr9	+	0	GCAGTCCATGGGCATATACA	GCAGTCCATGGGCATATACA	not reported	not reported	not reported	not reported	1.00832e-12	4.24393e-12	20.984	4.96947	53.6421	42.8334	8.25011	34.4842	4.19332	33.0041	False	False	True	False	False	False
miR-29a-5p__mir-29a__0__+1__23M	hsa-mir-29a	MI0000087	hsa-miR-29a-5p	MIMAT0004503	0	1	130876785	130876807	chr7	-	0	ACTGATTTCTTTTGGTGTTCAGA	ACTGATTTCTTTTGGTGTTCAGA	not reported	not reported	not reported	not reported	8.81889e-14	4.70554e-13	0.466344	0.468707	1.8688	2.4298	0.399137	1.4792	0.452895	2.07392	False	False	True	False	False	False
miR-2355-3p__mir-2355__+2__+1__21M	hsa-mir-2355	MI0015873	hsa-miR-2355-3p	MIMAT0017950	2	1	207109998	207110018	chr2	-	0	TGTCCTTGCTGTTTGGAGATA	TGTCCTTGCTGTTTGGAGATA	not reported	not reported	not reported	not reported	0.000248829	0.000402206	0.81377	0.866487	1.72173	2.07555	0.668111	1.31734	0.843736	1.54487	False	False	True	False	False	False
miR-142-3p__mir-142__0__-1__22M	hsa-mir-142	MI0000458	hsa-miR-142-3p	MIMAT0000434	0	-1	58331246	58331267	chr17	-	0	TGTAGTGTTTCCTACTTTATGG	TGTAGTGTTTCCTACTTTATGG	not reported	not reported	not reported	not reported	5.25844e-20	8.77279e-19	31.8321	42.0946	349.197	327.46	19.909	199.269	40.6938	233.362	False	False	True	False	False	False
miR-191-5p__mir-191__+1__0__22M	hsa-mir-191	MI0000465	hsa-miR-191-5p	MIMAT0000440	1	0	49020672	49020693	chr3	-	0	AACGGAATCCCAAAAGCAGCTG	AACGGAATCCCAAAAGCAGCTG	not reported	not reported	not reported	not reported	0.00069532	0.00107581	2.30749	1.40531	3.0886	3.51022	1.71724	2.55331	1.29974	2.76047	False	False	True	False	False	False
miR-125a-5p__mir-125a__0__-2__22M	hsa-mir-125a	MI0000469	hsa-miR-125a-5p	MIMAT0000443	0	-2	51693268	51693289	chr19	+	0	TCCCTGAGACCCTTTAACCTGT	TCCCTGAGACCCTTTAACCTGT	not reported	not reported	not reported	not reported	0.000167254	0.000275913	750.143	316.641	289.374	348.944	452.757	248.985	310.833	297.197	False	False	False	True	False	False
miR-192-5p__mir-192__0__-5__16M	hsa-mir-192	MI0000234	hsa-miR-192-5p	MIMAT0000222	0	-5	64891208	64891223	chr11	-	0	CTGACCTATGAATTGA	CTGACCTATGAATTGA	not reported	not reported	not reported	not reported	7.65773e-06	1.42668e-05	0.731975	0.771971	7.3179	2.41476	0.566133	2.13464	0.611734	1.3616	False	False	True	False	False	False
miR-10a-5p__mir-10a__+1__-3__19M	hsa-mir-10a	MI0000266	hsa-miR-10a-5p	MIMAT0000253	1	-3	48579907	48579925	chr17	-	0	ACCCTGTAGATCCGAATTT	ACCCTGTAGATCCGAATTT	not reported	not reported	not reported	not reported	0.00597426	0.00834993	104.047	84.7977	82.8248	72.9094	65.2675	58.3072	80.4754	53.8871	False	False	False	True	False	False
miR-3127-5p__mir-3127__0__-2__21M	hsa-mir-3127	MI0014144	hsa-miR-3127-5p	MIMAT0014990	0	-2	96798288	96798308	chr2	+	0	ATCAGGGCTTGTGGAATGGGA	ATCAGGGCTTGTGGAATGGGA	not reported	not reported	not reported	not reported	0.00105431	0.00159443	1.36235	0.437362	1.56286	1.599	0.909798	1.27242	0.413892	1.28961	False	False	True	False	False	False
miR-103a-3p__mir-103a-1__0__+1__24M	hsa-mir-103a-1	MI0000109	hsa-miR-103a-3p	MIMAT0000101	0	1	168560903	168560926	chr5	-	0	AGCAGCATTGTACAGGGCTATGAA	AGCAGCATTGTACAGGGCTATGAA	not reported	not reported	not reported	not reported	0.000134873	0.000225215	34.8572	42.2363	79.1865	86.1164	31.4673	56.0045	42.1525	66.6807	False	False	True	False	False	False
miR-29c-3p__mir-29c__-1__-5__18M	hsa-mir-29c	MI0000735	hsa-miR-29c-3p	MIMAT0000681	-1	-5	207801870	207801887	chr1	-	0	CTAGCACCATTTGAAATC	CTAGCACCATTTGAAATC	not reported	not reported	not reported	not reported	0.0171852	0.0225647	1.52669	1.4243	2.59285	4.43829	1.23736	1.70214	1.35469	2.76752	False	False	True	False	False	False
miR-24-3p__mir-24-1__0__-6__16M	hsa-mir-24-1	MI0000080	hsa-miR-24-3p	MIMAT0000080	0	-6	95086064	95086079	chr9	+	0	TGGCTCAGTTCAGCAG	TGGCTCAGTTCAGCAG	not reported	not reported	not reported	not reported	1.2248e-07	2.68959e-07	96.4671	134.219	58.5455	46.8233	76.6367	36.6111	111.156	36.6406	False	False	False	True	False	False
miR-195-5p__mir-195__0__-1__20M	hsa-mir-195	MI0000489	hsa-miR-195-5p	MIMAT0000461	0	-1	7017668	7017687	chr17	-	0	TAGCAGCACAGAAATATTGG	TAGCAGCACAGAAATATTGG	not reported	not reported	not reported	not reported	1.89276e-12	7.61856e-12	83.126	72.019	12.8629	12.0229	36.87	9.44437	60.6231	10.2696	False	False	False	True	False	False
miR-200c-5p__mir-200c__0__0__22M	hsa-mir-200c	MI0000650	hsa-miR-200c-5p	MIMAT0004657	0	0	6963703	6963724	chr12	+	0	CGTCTTACCCAGCAGTGTTTGG	CGTCTTACCCAGCAGTGTTTGG	not reported	not reported	not reported	not reported	5.44336e-12	1.98203e-11	10.7666	9.17622	26.5641	28.8711	8.69735	21.4171	8.63797	20.7984	False	False	True	False	False	False
miR-32-5p__mir-32__0__-1__21M	hsa-mir-32	MI0000090	hsa-miR-32-5p	MIMAT0000090	0	-1	109046273	109046293	chr9	-	0	TATTGCACATTACTAAGTTGC	TATTGCACATTACTAAGTTGC	not reported	not reported	not reported	not reported	0.00268275	0.00388962	16.2315	22.5845	14.23	18.5609	10.5524	12.2708	20.0385	15.9788	False	False	False	False	True	False
miR-30d-5p__mir-30d__0__-2__20M	hsa-mir-30d	MI0000255	hsa-miR-30d-5p	MIMAT0000245	0	-2	134804921	134804940	chr8	-	0	TGTAAACATCCCCGACTGGA	TGTAAACATCCCCGACTGGA	not reported	not reported	not reported	not reported	2.30391e-14	1.41105e-13	1195.31	1051.75	477.483	371.128	1011.7	336.614	967.111	281.532	False	False	False	True	False	False
miR-9-5p__mir-9-1__0__-2__21M	hsa-mir-9-1	MI0000466	hsa-miR-9-5p	MIMAT0000441	0	-2	156420394	156420414	chr1	-	0	TCTTTGGTTATCTAGCTGTAT	TCTTTGGTTATCTAGCTGTAT	not reported	not reported	not reported	not reported	4.42409e-19	6.08643e-18	8.80833	3.30969	201.723	147.369	3.75717	41.8127	2.7747	48.3975	False	False	True	False	False	False
let-7i-3p__let-7i__0__-1__21M	hsa-let-7i	MI0000434	hsa-let-7i-3p	MIMAT0004585	0	-1	62603747	62603767	chr12	+	0	CTGCGCAAGCTACTGCCTTGC	CTGCGCAAGCTACTGCCTTGC	not reported	not reported	not reported	not reported	0.000366136	0.000582626	17.8216	17.5058	27.4102	27.174	14.4895	22.5672	14.629	22.7078	False	False	True	False	False	False
miR-29c-5p__mir-29c__+2__+2__22M	hsa-mir-29c	MI0000735	hsa-miR-29c-5p	MIMAT0004673	2	2	207801901	207801922	chr1	-	0	ACCGATTTCTCCTGGTGTTCAG	ACCGATTTCTCCTGGTGTTCAG	not reported	not reported	not reported	not reported	3.06251e-08	7.1966e-08	3.34021	2.25714	7.87268	8.28491	2.36063	5.7443	2.06438	6.34435	False	False	True	False	False	False
miR-143-3p__mir-143__+2__-1__18M	hsa-mir-143	MI0000459	hsa-miR-143-3p	MIMAT0000435	2	-1	149428980	149428997	chr5	+	0	AGATGAAGCACTGTAGCT	AGATGAAGCACTGTAGCT	not reported	not reported	not reported	not reported	5.44789e-13	2.42297e-12	19.6486	18.8393	4.00162	2.98983	12.1007	2.22804	16.5029	1.57264	False	False	False	True	False	False
miR-140-3p__mir-140__+1__-4__16M	hsa-mir-140	MI0000456	hsa-miR-140-3p	MIMAT0004597	1	-4	69933143	69933158	chr16	+	0	ACCACAGGGTAGAACC	ACCACAGGGTAGAACC	not reported	not reported	not reported	not reported	0.00142299	0.00213016	2.45582	2.79117	2.74324	1.42907	2.13331	1.54743	2.39931	1.17966	False	False	False	True	False	False
miR-134-5p__mir-134__0__-5__17M	hsa-mir-134	MI0000474	hsa-miR-134-5p	MIMAT0000447	0	-5	101054694	101054710	chr14	+	0	TGTGACTGGTTGACCAG	TGTGACTGGTTGACCAG	not reported	not reported	not reported	not reported	1.65451e-09	4.4017e-09	3.5129	4.11734	28.7053	18.5325	2.78919	10.2945	2.87521	11.3987	False	False	True	False	False	False
miR-1247-3p__mir-1247__+3__-1__20M	hsa-mir-1247	MI0006382	hsa-miR-1247-3p	MIMAT0022721	3	-1	101560327	101560346	chr14	-	0	CGGGAACGTCGAGACTGGAG	CGGGAACGTCGAGACTGGAG	not reported	not reported	not reported	not reported	5.77772e-15	3.88023e-14	7.68082	3.6287	2.23373	1.50366	5.67841	1.18046	3.43061	0.841258	False	False	False	True	False	False
miR-423-3p__mir-423__+1__0__22M	hsa-mir-423	MI0001445	hsa-miR-423-3p	MIMAT0001340	1	0	30117132	30117153	chr17	+	0	GCTCGGTCTGAGGCCCCTCAGT	GCTCGGTCTGAGGCCCCTCAGT	not reported	not reported	not reported	not reported	8.87485e-08	1.98553e-07	2.51668	0.266358	1.53784	1.11062	0.865785	1.26097	0.255107	0.973403	False	False	True	False	False	False
miR-21-5p__mir-21__+6__0__16M	hsa-mir-21	MI0000077	hsa-miR-21-5p	MIMAT0000076	6	0	59841279	59841294	chr17	+	0	ATCAGACTGATGTTGA	ATCAGACTGATGTTGA	not reported	not reported	not reported	not reported	4.29881e-13	1.95676e-12	0.145842	0.0396277	1.73701	1.23644	0.124407	1.17609	0.0361909	0.896993	False	False	True	False	False	False
miR-424-5p__mir-424__0__-2__20M	hsa-mir-424	MI0001446	hsa-miR-424-5p	MIMAT0001341	0	-2	134546682	134546701	chrX	-	0	CAGCAGCAATTCATGTTTTG	CAGCAGCAATTCATGTTTTG	not reported	not reported	not reported	not reported	2.96857e-11	9.68595e-11	5.24384	5.55212	15.7757	20.0307	4.27758	11.4004	4.44133	14.0093	False	False	True	False	False	False
miR-331-3p__mir-331__0__-4__17M	hsa-mir-331	MI0000812	hsa-miR-331-3p	MIMAT0000760	0	-4	95308480	95308496	chr12	+	0	GCCCCTGGGCCTATCCT	GCCCCTGGGCCTATCCT	not reported	not reported	not reported	not reported	7.84391e-12	2.77548e-11	0.923221	0.6942	3.73647	4.63141	0.615156	2.59571	0.634229	3.20802	False	False	True	False	False	False
miR-200b-3p__mir-200b__0__-1__21M	hsa-mir-200b	MI0000342	hsa-miR-200b-3p	MIMAT0000318	0	-1	1167160	1167180	chr1	+	0	TAATACTGCCTGGTAATGATG	TAATACTGCCTGGTAATGATG	not reported	not reported	not reported	not reported	1.99008e-05	3.57535e-05	96.8572	104.367	194.649	173.186	76.7084	142.015	102.301	139.78	False	False	True	False	False	False
miR-7-1-3p__mir-7-1__0__-3__19M	hsa-mir-7-1	MI0000263	hsa-miR-7-1-3p	MIMAT0004553	0	-3	83969774	83969792	chr9	-	0	CAACAAATCACAGTCTGCC	CAACAAATCACAGTCTGCC	not reported	not reported	not reported	not reported	1.46775e-14	9.18775e-14	0.257238	0.312719	1.45513	1.21954	0.219306	1.18824	0.268734	0.932164	False	False	True	False	False	False
miR-183-5p__mir-183__0__+1__23M	hsa-mir-183	MI0000273	hsa-miR-183-5p	MIMAT0000261	0	1	129774966	129774988	chr7	-	0	TATGGCACTGGTAGAATTCACTG	TATGGCACTGGTAGAATTCACTG	not reported	not reported	not reported	not reported	2.03123e-25	9.60095e-23	162.761	134.336	1795.03	1740.59	139.981	1186.27	133.213	1299.78	False	False	True	False	False	False
miR-143-3p__mir-143__-1__-6__16M	hsa-mir-143	MI0000459	hsa-miR-143-3p	MIMAT0000435	-1	-6	149428977	149428992	chr5	+	0	CTGAGATGAAGCACTG	CTGAGATGAAGCACTG	not reported	not reported	not reported	not reported	6.34177e-07	1.30045e-06	16.7735	22.588	7.18238	5.40841	10.219	4.71121	16.9637	4.06089	False	False	False	True	False	False
miR-107__mir-107__0__-2__21M	hsa-mir-107	MI0000114	hsa-miR-107	MIMAT0000104	0	-2	89592758	89592778	chr10	-	0	AGCAGCATTGTACAGGGCTAT	AGCAGCATTGTACAGGGCTAT	not reported	not reported	not reported	not reported	0.00361725	0.00518136	418.978	524.282	330.228	307.86	350.494	256.134	511.37	268.418	False	False	False	True	False	False
miR-323b-3p__mir-323b__0__-1__21M	hsa-mir-323b	MI0014206	hsa-miR-323b-3p	MIMAT0015050	0	-1	101056269	101056289	chr14	+	0	CCCAATACACGGTCGACCTCT	CCCAATACACGGTCGACCTCT	not reported	not reported	not reported	not reported	6.65374e-09	1.66434e-08	0.593847	0.11826	5.23777	3.73043	0.304042	1.37878	0.111705	1.30954	False	False	True	False	False	False
miR-375-3p__mir-375__+1__-3__18M	hsa-mir-375	MI0000783	hsa-miR-375-3p	MIMAT0000728	1	-3	219001651	219001668	chr2	-	0	TTGTTCGTTCGGCTCGCG	TTGTTCGTTCGGCTCGCG	not reported	not reported	not reported	not reported	3.57833e-07	7.50898e-07	13.3941	7.08283	64.8467	63.3729	6.9783	20.0435	6.4307	19.9488	False	False	True	False	False	False
miR-26a-5p__mir-26a-1__0__+2__24M	hsa-mir-26a-1	MI0000083	hsa-miR-26a-5p	MIMAT0000082	0	2	37969413	37969436	chr3	+	0	TTCAAGTAATCCAGGATAGGCTGT	TTCAAGTAATCCAGGATAGGCTGT	not reported	not reported	not reported	not reported	0.012184	0.0163235	59.8239	68.1548	53.7738	56.4218	54.9937	43.4803	66.5303	46.9948	False	False	False	True	False	False
miR-101-3p__mir-101-1__-1__0__22M	hsa-mir-101-1	MI0000103	hsa-miR-101-3p	MIMAT0000099	-1	0	65058442	65058463	chr1	-	0	GTACAGTACTGTGATAACTGAA	GTACAGTACTGTGATAACTGAA	not reported	not reported	not reported	not reported	0.000323479	0.000516978	300.371	417.59	245.866	232.454	149.174	218.897	412.169	212.365	False	False	False	False	True	False
miR-1843__mir-1843__-1__0__21M	hsa-mir-1843	MI0032314	hsa-miR-1843	MIMAT0039764	-1	0	175968440	175968460	chr1	-	0	ATATGGAGGTCTCTGTCTGGC	ATATGGAGGTCTCTGTCTGGC	not reported	not reported	not reported	not reported	1.84202e-10	5.47254e-10	4.23748	3.19543	2.46776	1.61335	3.89284	2.03343	2.36417	1.37861	False	False	False	True	False	False
miR-183-5p__mir-183__0__-2__20M	hsa-mir-183	MI0000273	hsa-miR-183-5p	MIMAT0000261	0	-2	129774969	129774988	chr7	-	0	TATGGCACTGGTAGAATTCA	TATGGCACTGGTAGAATTCA	not reported	not reported	not reported	not reported	2.24334e-10	6.60112e-10	366.176	440.662	1152.84	1151.92	292.201	797.49	360.936	812.829	False	False	True	False	False	False
miR-181c-5p__mir-181c__0__0__22M	hsa-mir-181c	MI0000271	hsa-miR-181c-5p	MIMAT0000258	0	0	13874725	13874746	chr19	+	0	AACATTCAACCTGTCGGTGAGT	AACATTCAACCTGTCGGTGAGT	not reported	not reported	not reported	not reported	0.0357405	0.0451285	17.5603	24.8704	21.6237	30.1359	16.0401	17.5577	23.5843	22.9561	False	False	False	False	True	False
miR-93-5p__mir-93__0__-5__18M	hsa-mir-93	MI0000095	hsa-miR-93-5p	MIMAT0000093	0	-5	100093820	100093837	chr7	-	0	CAAAGTGCTGTTCGTGCA	CAAAGTGCTGTTCGTGCA	not reported	not reported	not reported	not reported	5.91452e-08	1.35362e-07	1.52098	1.58495	9.85276	6.04995	1.34455	4.10676	1.43808	3.42176	False	False	True	False	False	False
miR-1307-5p__mir-1307__0__-4__17M	hsa-mir-1307	MI0006444	hsa-miR-1307-5p	MIMAT0022727	0	-4	103394345	103394361	chr10	-	0	TCGACCGGACCTCGACC	TCGACCGGACCTCGACC	not reported	not reported	not reported	not reported	1.52608e-15	1.12533e-14	0.245598	0.317306	2.19716	2.31714	0.208027	1.48016	0.282821	1.81257	False	False	True	False	False	False
miR-1307-5p__mir-1307__0__-5__16M	hsa-mir-1307	MI0006444	hsa-miR-1307-5p	MIMAT0022727	0	-5	103394346	103394361	chr10	-	0	TCGACCGGACCTCGAC	TCGACCGGACCTCGAC	not reported	not reported	not reported	not reported	4.34165e-13	1.96896e-12	0.351486	0.34165	3.45418	2.04994	0.282726	1.46775	0.287481	1.74684	False	False	True	False	False	False
miR-1287-3p__mir-1287__0__-1__21M	hsa-mir-1287	MI0006349	hsa-miR-1287-3p	MIMAT0026738	0	-1	98395233	98395253	chr10	-	0	CTCTAGCCACAGATGCAGTGA	CTCTAGCCACAGATGCAGTGA	not reported	not reported	not reported	not reported	9.19778e-18	9.91062e-17	0.389359	0.15497	2.58969	2.30341	0.259865	1.89565	0.143953	1.82968	False	False	True	False	False	False
miR-10399-5p__mir-10399__0__+2__23M	hsa-mir-10399	MI0033423	hsa-miR-10399-5p	MIMAT0041629	0	2	139044135	139044157	chr7	-	0	AATTACAGATTGTCTCAGAGAAA	AATTACAGATTGTCTCAGAGAAA	not reported	not reported	not reported	not reported	0.00980897	0.0132767	6.49739	6.98083	5.28454	5.29833	4.83499	4.21703	6.77516	4.40338	False	False	False	True	False	False
miR-374a-3p__mir-374a__0__-6__16M	hsa-mir-374a	MI0000782	hsa-miR-374a-3p	MIMAT0004688	0	-6	74287301	74287316	chrX	-	0	CTTATCAGATTGTATT	CTTATCAGATTGTATT	not reported	not reported	not reported	not reported	2.58384e-06	5.05905e-06	29.5589	28.2259	12.5357	11.1579	15.7462	7.50326	24.9039	8.6723	False	False	False	True	False	False
miR-200c-3p__mir-200c__+3__-1__19M	hsa-mir-200c	MI0000650	hsa-miR-200c-3p	MIMAT0000617	3	-1	6963745	6963763	chr12	+	0	TACTGCCGGGTAATGATGG	TACTGCCGGGTAATGATGG	not reported	not reported	not reported	not reported	1.06362e-11	3.68916e-11	1.39706	0.469578	3.79221	2.52994	0.839075	2.39921	0.407732	1.2811	False	False	True	False	False	False
let-7g-5p__let-7g__0__-3__19M	hsa-let-7g	MI0000433	hsa-let-7g-5p	MIMAT0000414	0	-3	52268339	52268357	chr3	-	0	TGAGGTAGTAGTTTGTACA	TGAGGTAGTAGTTTGTACA	not reported	not reported	not reported	not reported	9.08099e-12	3.17662e-11	39.7907	48.1055	10.2082	8.66207	24.0695	6.47739	43.7123	6.38484	False	False	False	True	False	False
miR-181a-3p__mir-181a-1__0__-1__21M	hsa-mir-181a-1	MI0000289	hsa-miR-181a-3p	MIMAT0000270	0	-1	198859070	198859090	chr1	-	0	ACCATCGACCGTTGATTGTAC	ACCATCGACCGTTGATTGTAC	not reported	not reported	not reported	not reported	0.000651721	0.00101217	57.5288	88.0474	91.9076	93.9377	51.3546	77.6916	83.519	81.8227	False	False	False	False	True	False
miR-103a-3p__mir-103a-1__0__-1__22M	hsa-mir-103a-1	MI0000109	hsa-miR-103a-3p	MIMAT0000101	0	-1	168560905	168560926	chr5	-	0	AGCAGCATTGTACAGGGCTATG	AGCAGCATTGTACAGGGCTATG	not reported	not reported	not reported	not reported	0.000709175	0.00109586	2629.14	3449.56	2303.51	2349.74	2259.95	2121.71	3279.42	2193.13	False	False	False	True	False	False
miR-664a-3p__mir-664a__0__-3__20M	hsa-mir-664a	MI0006442	hsa-miR-664a-3p	MIMAT0005949	0	-3	220200552	220200571	chr1	-	0	TATTCATTTATCCCCAGCCT	TATTCATTTATCCCCAGCCT	not reported	not reported	not reported	not reported	0.0210115	0.0272205	1.04767	1.12285	1.69713	1.2787	0.835338	1.34047	0.988043	1.07529	False	False	True	False	False	False
miR-382-5p__mir-382__+1__0__21M	hsa-mir-382	MI0000790	hsa-miR-382-5p	MIMAT0000737	1	0	101054317	101054337	chr14	+	0	AAGTTGTTCGTGGTGGATTCG	AAGTTGTTCGTGGTGGATTCG	not reported	not reported	not reported	not reported	0.000311263	0.000498102	0.783303	1.13905	2.41488	2.00341	0.659952	1.51095	0.897622	1.51301	False	False	True	False	False	False
miR-92a-3p__mir-92a-1__0__+1__23M	hsa-mir-92a-1	MI0000093	hsa-miR-92a-3p	MIMAT0000092	0	1	91351361	91351383	chr13	+	0	TATTGCACTTGTCCCGGCCTGTT	TATTGCACTTGTCCCGGCCTGTT	not reported	not reported	not reported	not reported	0.0313702	0.0398971	458.605	226.446	403.686	430.575	265.887	304.449	225.193	338.747	False	False	True	False	False	False
miR-345-5p__mir-345__0__0__22M	hsa-mir-345	MI0000825	hsa-miR-345-5p	MIMAT0000772	0	0	100307876	100307897	chr14	+	0	GCTGACTCCTAGTCCAGGGCTC	GCTGACTCCTAGTCCAGGGCTC	not reported	not reported	not reported	not reported	5.69084e-11	1.79795e-10	3.49315	1.59748	7.42479	9.70635	1.82443	5.34469	1.44858	5.93441	False	False	True	False	False	False
miR-139-5p__mir-139__0__-1__22M	hsa-mir-139	MI0000261	hsa-miR-139-5p	MIMAT0000250	0	-1	72615103	72615124	chr11	-	0	TCTACAGTGCACGTGTCTCCAG	TCTACAGTGCACGTGTCTCCAG	not reported	not reported	not reported	not reported	1.30397e-13	6.68668e-13	90.714	48.573	22.6652	23.7097	55.273	16.9125	47.0379	19.2259	False	False	False	True	False	False
miR-378a-3p__mir-378a__+1__-2__19M	hsa-mir-378a	MI0000786	hsa-miR-378a-3p	MIMAT0000732	1	-2	149732868	149732886	chr5	+	0	CTGGACTTGGAGTCAGAAG	CTGGACTTGGAGTCAGAAG	not reported	not reported	not reported	not reported	1.17782e-05	2.16698e-05	9.89219	12.2431	6.7195	4.9779	8.06775	5.02157	11.4495	3.85626	False	False	False	True	False	False
miR-140-3p__mir-140__0__-1__20M	hsa-mir-140	MI0000456	hsa-miR-140-3p	MIMAT0004597	0	-1	69933142	69933161	chr16	+	0	TACCACAGGGTAGAACCACG	TACCACAGGGTAGAACCACG	not reported	not reported	not reported	not reported	1.42717e-07	3.11174e-07	49.9311	48.8522	30.8532	31.921	45.0791	25.536	44.1178	25.935	False	False	False	True	False	False
miR-24-1-5p__mir-24-1__-1__-1__22M	hsa-mir-24-1	MI0000080	hsa-miR-24-1-5p	MIMAT0000079	-1	-1	95086026	95086047	chr9	+	0	GTGCCTACTGAGCTGATATCAG	GTGCCTACTGAGCTGATATCAG	not reported	not reported	not reported	not reported	2.30318e-07	4.94286e-07	0.8261	1.16091	2.12354	2.57504	0.728731	1.70051	1.07906	2.06451	False	False	True	False	False	False
miR-141-3p__mir-141__0__-2__20M	hsa-mir-141	MI0000457	hsa-miR-141-3p	MIMAT0000432	0	-2	6964155	6964174	chr12	+	0	TAACACTGTCTGGTAAAGAT	TAACACTGTCTGGTAAAGAT	not reported	not reported	not reported	not reported	7.41401e-08	1.68218e-07	10.1507	10.6783	27.2056	33.3436	7.34014	19.77	10.5489	21.4056	False	False	True	False	False	False
let-7a-2-3p__let-7a-2__0__0__22M	hsa-let-7a-2	MI0000061	hsa-let-7a-2-3p	MIMAT0010195	0	0	122146523	122146544	chr11	-	0	CTGTACAGCCTCCTAGCTTTCC	CTGTACAGCCTCCTAGCTTTCC	not reported	not reported	not reported	not reported	1.97678e-09	5.20972e-09	2.16295	0.980625	7.43283	6.16179	1.45495	4.46472	0.88588	3.79202	False	False	True	False	False	False
miR-625-3p__mir-625__0__-1__21M	hsa-mir-625	MI0003639	hsa-miR-625-3p	MIMAT0004808	0	-1	65471153	65471173	chr14	+	0	GACTATAGAACTTTCCCCCTC	GACTATAGAACTTTCCCCCTC	not reported	not reported	not reported	not reported	2.99353e-09	7.72368e-09	29.5425	22.2659	54.5045	48.1374	23.3016	43.0408	21.3753	40.9441	False	False	True	False	False	False
miR-224-5p__mir-224__+1__0__24M	hsa-mir-224	MI0000301	hsa-miR-224-5p	MIMAT0000281	1	0	151958628	151958651	chrX	-	0	CAAGTCACTAGTGGTTCCGTTTAG	CAAGTCACTAGTGGTTCCGTTTAG	not reported	not reported	not reported	not reported	4.59562e-08	1.06366e-07	3.47361	2.84788	15.0617	14.0503	2.91574	8.34736	2.79982	7.62142	False	False	True	False	False	False
miR-30a-5p__mir-30a__+1__0__21M	hsa-mir-30a	MI0000088	hsa-miR-30a-5p	MIMAT0000087	1	0	71403595	71403615	chr6	-	0	GTAAACATCCTCGACTGGAAG	GTAAACATCCTCGACTGGAAG	not reported	not reported	not reported	not reported	1.80368e-15	1.31874e-14	190.864	203.528	39.9113	29.6435	131.672	27.4222	188.124	21.4251	False	False	False	True	False	False
miR-12136__mir-12136__0__+5__23M	hsa-mir-12136	MI0039740	hsa-miR-12136	MIMAT0049032	0	5	632663	632685	chr1	-	0	GAAAAAGTCATGGAGGCCATGGG	GAAAAAGTCATGGAGGCCATGGG	not reported	not reported	not reported	not reported	1.06727e-12	4.47163e-12	0.449969	0.110913	1.98005	2.11256	0.206699	1.3745	0.100236	1.49601	False	False	True	False	False	False
miR-34a-5p__mir-34a__0__0__22M	hsa-mir-34a	MI0000268	hsa-miR-34a-5p	MIMAT0000255	0	0	9151735	9151756	chr1	-	0	TGGCAGTGTCTTAGCTGGTTGT	TGGCAGTGTCTTAGCTGGTTGT	not reported	not reported	not reported	not reported	8.44163e-07	1.70825e-06	55.5345	67.1883	94.3914	107.744	47.9703	81.4338	61.94	89.6431	False	False	True	False	False	False
miR-29c-5p__mir-29c__+1__-1__20M	hsa-mir-29c	MI0000735	hsa-miR-29c-5p	MIMAT0004673	1	-1	207801904	207801923	chr1	-	0	GACCGATTTCTCCTGGTGTT	GACCGATTTCTCCTGGTGTT	not reported	not reported	not reported	not reported	0.00122705	0.0018481	0.956078	0.640767	1.70112	1.57661	0.80642	1.37492	0.569995	1.37703	False	False	True	False	False	False
miR-142-3p__mir-142__+1__-3__19M	hsa-mir-142	MI0000458	hsa-miR-142-3p	MIMAT0000434	1	-3	58331248	58331266	chr17	-	0	GTAGTGTTTCCTACTTTAT	GTAGTGTTTCCTACTTTAT	not reported	not reported	not reported	not reported	2.949e-10	8.54792e-10	1.48083	1.50106	6.8491	5.16793	1.04226	4.22863	1.38708	3.81538	False	False	True	False	False	False
miR-29a-3p__mir-29a__-1__-5__18M	hsa-mir-29a	MI0000087	hsa-miR-29a-3p	MIMAT0000086	-1	-5	130876753	130876770	chr7	-	0	CTAGCACCATCTGAAATC	CTAGCACCATCTGAAATC	not reported	not reported	not reported	not reported	6.40596e-06	1.20504e-05	2.53696	2.51945	6.88068	8.19202	2.29174	4.50554	2.41498	3.89553	False	False	True	False	False	False
miR-29b-3p__mir-29b-1__0__-5__18M	hsa-mir-29b-1	MI0000105	hsa-miR-29b-3p	MIMAT0000100	0	-5	130877472	130877489	chr7	-	0	TAGCACCATTTGAAATCA	TAGCACCATTTGAAATCA	not reported	not reported	not reported	not reported	0.00916424	0.0124268	2.42086	2.4479	4.23015	4.06543	1.85473	3.17406	2.18674	3.17511	False	False	True	False	False	False
miR-2355-5p__mir-2355__0__0__21M	hsa-mir-2355	MI0015873	hsa-miR-2355-5p	MIMAT0016895	0	0	207110043	207110063	chr2	-	0	ATCCCCAGATACAATGGACAA	ATCCCCAGATACAATGGACAA	not reported	not reported	not reported	not reported	0.00138095	0.00207226	2.38247	2.37808	4.4678	4.44502	1.93835	3.44851	2.18969	3.6291	False	False	True	False	False	False
miR-451a__mir-451a__+2__0__20M	hsa-mir-451a	MI0001729	hsa-miR-451a	MIMAT0001631	2	0	28861403	28861422	chr17	-	0	ACCGTTACCATTACTGAGTT	ACCGTTACCATTACTGAGTT	not reported	not reported	not reported	not reported	0.000221172	0.000359552	2.48734	4.30136	2.77365	2.22669	1.31783	1.52046	2.74772	0.807817	False	False	False	False	True	False
miR-93-5p__mir-93__+3__0__20M	hsa-mir-93	MI0000095	hsa-miR-93-5p	MIMAT0000093	3	0	100093815	100093834	chr7	-	0	AGTGCTGTTCGTGCAGGTAG	AGTGCTGTTCGTGCAGGTAG	not reported	not reported	not reported	not reported	1.68912e-11	5.70834e-11	0.793438	0.772115	20.6967	7.49246	0.620431	3.35191	0.68568	1.55373	False	False	True	False	False	False
miR-21-5p__mir-21__+2__-1__19M	hsa-mir-21	MI0000077	hsa-miR-21-5p	MIMAT0000076	2	-1	59841275	59841293	chr17	+	0	GCTTATCAGACTGATGTTG	GCTTATCAGACTGATGTTG	not reported	not reported	not reported	not reported	1.38601e-13	7.0583e-13	1.77893	2.11125	21.387	12.9518	1.28701	9.38656	1.99197	5.09834	False	False	True	False	False	False
miR-21-5p__mir-21__-1__-7__16M	hsa-mir-21	MI0000077	hsa-miR-21-5p	MIMAT0000076	-1	-7	59841272	59841287	chr17	+	0	GTAGCTTATCAGACTG	GTAGCTTATCAGACTG	not reported	not reported	not reported	not reported	7.5331e-14	4.12085e-13	0.346624	0.41996	2.09253	1.39951	0.287154	1.35809	0.404054	1.17237	False	False	True	False	False	False
miR-17-5p__mir-17__0__-2__21M	hsa-mir-17	MI0000071	hsa-miR-17-5p	MIMAT0000070	0	-2	91350618	91350638	chr13	+	0	CAAAGTGCTTACAGTGCAGGT	CAAAGTGCTTACAGTGCAGGT	not reported	not reported	not reported	not reported	0.0049369	0.00696874	10.0121	14.1288	16.6685	16.1708	7.89387	13.0021	11.7069	12.6693	False	False	True	False	False	False
let-7g-5p__let-7g__0__-4__18M	hsa-let-7g	MI0000433	hsa-let-7g-5p	MIMAT0000414	0	-4	52268340	52268357	chr3	-	0	TGAGGTAGTAGTTTGTAC	TGAGGTAGTAGTTTGTAC	not reported	not reported	not reported	not reported	0.00376072	0.00537432	17.9693	21.2565	18.4319	26.316	12.4685	9.88186	20.2649	16.2916	False	False	False	True	False	False
miR-182-5p__mir-182__+1__-3__20M	hsa-mir-182	MI0000272	hsa-miR-182-5p	MIMAT0000259	1	-3	129770450	129770469	chr7	-	0	TTGGCAATGGTAGAACTCAC	TTGGCAATGGTAGAACTCAC	not reported	not reported	not reported	not reported	8.95543e-17	8.35916e-16	0.41477	0.553044	2.97139	2.55269	0.355165	2.07683	0.475732	1.98363	False	False	True	False	False	False
miR-24-3p__mir-24-1__+3__0__19M	hsa-mir-24-1	MI0000080	hsa-miR-24-3p	MIMAT0000080	3	0	95086067	95086085	chr9	+	0	CTCAGTTCAGCAGGAACAG	CTCAGTTCAGCAGGAACAG	not reported	not reported	not reported	not reported	0.00366912	0.00525262	2.02252	1.39232	3.52102	2.95314	1.75887	2.58551	1.35512	1.86238	False	False	True	False	False	False
miR-514a-3p__mir-514a-1__0__0__21M	hsa-mir-514a-1	MI0003198	hsa-miR-514a-3p	MIMAT0002883	0	0	147279266	147279286	chrX	-	0	ATTGACACTTCTGTGAGTAGA	ATTGACACTTCTGTGAGTAGA	not reported	not reported	not reported	not reported	0.0223579	0.0288532	5.58734	3.87812	6.82757	4.43269	2.98116	1.83299	3.0221	1.43782	False	False	False	True	False	False
miR-92b-3p__mir-92b__0__-3__19M	hsa-mir-92b	MI0003560	hsa-miR-92b-3p	MIMAT0003218	0	-3	155195237	155195255	chr1	+	0	TATTGCACTCGTCCCGGCC	TATTGCACTCGTCCCGGCC	not reported	not reported	not reported	not reported	3.6387e-05	6.39097e-05	10.6835	4.39089	22.0413	26.5026	7.43471	14.1329	3.45149	13.9523	False	False	True	False	False	False
miR-337-3p__mir-337__+1__0__21M	hsa-mir-337	MI0000806	hsa-miR-337-3p	MIMAT0000754	1	0	100874554	100874574	chr14	+	0	TCCTATATGATGCCTTTCTTC	TCCTATATGATGCCTTTCTTC	not reported	not reported	not reported	not reported	0.00382119	0.00545863	2.91244	2.59825	6.5941	4.65142	2.4514	4.27431	2.45582	3.88726	False	False	True	False	False	False
miR-16-5p__mir-16-1__0__-3__19M	hsa-mir-16-1	MI0000070	hsa-miR-16-5p	MIMAT0000069	0	-3	50049030	50049048	chr13	-	0	TAGCAGCACGTAAATATTG	TAGCAGCACGTAAATATTG	not reported	not reported	not reported	not reported	0.00091587	0.00139653	19.8902	26.4279	12.0189	11.8132	12.2241	9.51105	19.7945	9.5292	False	False	False	True	False	False
miR-192-5p__mir-192__+1__+3__23M	hsa-mir-192	MI0000234	hsa-miR-192-5p	MIMAT0000222	1	3	64891200	64891222	chr11	-	0	TGACCTATGAATTGACAGCCAGT	TGACCTATGAATTGACAGCCAGT	not reported	not reported	not reported	not reported	0.0251024	0.0321922	5.50886	4.68665	20.6419	16.0767	2.92669	6.54443	4.56601	5.73419	False	False	True	False	False	False
miR-144-5p__mir-144__0__-1__21M	hsa-mir-144	MI0000460	hsa-miR-144-5p	MIMAT0004600	0	-1	28861584	28861604	chr17	-	0	GGATATCATCATATACTGTAA	GGATATCATCATATACTGTAA	not reported	not reported	not reported	not reported	4.03833e-14	2.37091e-13	60.3864	75.1219	4.50452	4.76001	25.7633	2.79233	64.8522	2.91423	False	False	False	True	False	False
miR-223-3p__mir-223__0__-2__20M	hsa-mir-223	MI0000300	hsa-miR-223-3p	MIMAT0000280	0	-2	66018937	66018956	chrX	+	0	TGTCAGTTTGTCAAATACCC	TGTCAGTTTGTCAAATACCC	not reported	not reported	not reported	not reported	0.00472342	0.00668276	15.3949	22.57	10.2844	12.1787	9.91704	7.48606	17.6518	7.66866	False	False	False	True	False	False
miR-27b-5p__mir-27b__0__-1__21M	hsa-mir-27b	MI0000440	hsa-miR-27b-5p	MIMAT0004588	0	-1	95085463	95085483	chr9	+	0	AGAGCTTAGCTGATTGGTGAA	AGAGCTTAGCTGATTGGTGAA	not reported	not reported	not reported	not reported	0.00542907	0.00762551	0.81515	1.06898	1.40937	1.44361	0.707494	1.19893	1.02787	1.24992	False	False	True	False	False	False
miR-21-5p__mir-21__+2__0__20M	hsa-mir-21	MI0000077	hsa-miR-21-5p	MIMAT0000076	2	0	59841275	59841294	chr17	+	0	GCTTATCAGACTGATGTTGA	GCTTATCAGACTGATGTTGA	not reported	not reported	not reported	not reported	1.54224e-09	4.12645e-09	9.37962	10.9426	61.4196	31.2805	5.61156	26.8894	10.4594	13.9542	False	False	True	False	False	False
miR-186-5p__mir-186__0__-4__18M	hsa-mir-186	MI0000483	hsa-miR-186-5p	MIMAT0000456	0	-4	71067685	71067702	chr1	-	0	CAAAGAATTCTCCTTTTG	CAAAGAATTCTCCTTTTG	not reported	not reported	not reported	not reported	1.7531e-07	3.80217e-07	0.455655	0.299141	1.50153	1.52006	0.37129	1.07548	0.287122	1.09531	False	False	True	False	False	False
miR-584-5p__mir-584__0__-1__21M	hsa-mir-584	MI0003591	hsa-miR-584-5p	MIMAT0003249	0	-1	149062374	149062394	chr5	-	0	TTATGGTTTGCCTGGGACTGA	TTATGGTTTGCCTGGGACTGA	not reported	not reported	not reported	not reported	1.0398e-16	9.41402e-16	55.9481	57.4988	28.9856	16.5655	51.0946	16.007	52.6075	12.2664	False	False	False	True	False	False
miR-10a-5p__mir-10a__0__-5__18M	hsa-mir-10a	MI0000266	hsa-miR-10a-5p	MIMAT0000253	0	-5	48579909	48579926	chr17	-	0	TACCCTGTAGATCCGAAT	TACCCTGTAGATCCGAAT	not reported	not reported	not reported	not reported	0.00325093	0.00467661	41.437	31.0257	56.2969	72.6365	25.1022	20.515	28.4921	17.7506	False	False	False	True	False	False
miR-152-3p__mir-152__0__+1__22M	hsa-mir-152	MI0000462	hsa-miR-152-3p	MIMAT0000438	0	1	48037173	48037194	chr17	-	0	TCAGTGCATGACAGAACTTGGG	TCAGTGCATGACAGAACTTGGG	not reported	not reported	not reported	not reported	0.0234355	0.0301804	35.7965	43.7378	32.3587	34.8268	30.5575	28.1664	42.4408	30.7917	False	False	False	True	False	False
miR-24-3p__mir-24-1__+3__-2__17M	hsa-mir-24-1	MI0000080	hsa-miR-24-3p	MIMAT0000080	3	-2	95086067	95086083	chr9	+	0	CTCAGTTCAGCAGGAAC	CTCAGTTCAGCAGGAAC	not reported	not reported	not reported	not reported	0.000952043	0.0014469	0.907039	0.430206	1.93771	1.92229	0.701256	1.33889	0.407847	1.0382	False	False	True	False	False	False
miR-200a-3p__mir-200a__0__-4__18M	hsa-mir-200a	MI0000737	hsa-miR-200a-3p	MIMAT0000682	0	-4	1167916	1167933	chr1	+	0	TAACACTGTCTGGTAACG	TAACACTGTCTGGTAACG	not reported	not reported	not reported	not reported	5.82497e-10	1.62825e-09	3.06489	3.34171	16.3596	16.1874	2.39986	8.77675	3.25432	10.9277	False	False	True	False	False	False
miR-141-3p__mir-141__0__+2__24M	hsa-mir-141	MI0000457	hsa-miR-141-3p	MIMAT0000432	0	2	6964155	6964178	chr12	+	0	TAACACTGTCTGGTAAAGATGGCT	TAACACTGTCTGGTAAAGATGGCT	not reported	not reported	not reported	not reported	8.17406e-19	1.09195e-17	1.21646	0.945749	8.64591	9.73478	0.99266	5.59764	0.859855	6.53182	False	False	True	False	False	False
miR-143-3p__mir-143__-2__-2__21M	hsa-mir-143	MI0000459	hsa-miR-143-3p	MIMAT0000435	-2	-2	149428976	149428996	chr5	+	0	TCTGAGATGAAGCACTGTAGC	TCTGAGATGAAGCACTGTAGC	not reported	not reported	not reported	not reported	5.02525e-14	2.88692e-13	5.55791	4.67344	1.06493	0.967153	4.03266	0.925805	4.28249	0.871671	False	False	False	True	False	False
miR-183-5p__mir-183__-2__-7__17M	hsa-mir-183	MI0000273	hsa-miR-183-5p	MIMAT0000261	-2	-7	129774974	129774990	chr7	-	0	TGTATGGCACTGGTAGA	TGTATGGCACTGGTAGA	not reported	not reported	not reported	not reported	8.37585e-16	6.48776e-15	0.22874	0.37218	2.98394	3.85454	0.194977	1.83883	0.27864	2.4742	False	False	True	False	False	False
miR-106b-5p__mir-106b__0__+2__23M	hsa-mir-106b	MI0000734	hsa-miR-106b-5p	MIMAT0000680	0	2	100094041	100094063	chr7	-	0	TAAAGTGCTGACAGTGCAGATAG	TAAAGTGCTGACAGTGCAGATAG	not reported	not reported	not reported	not reported	0.00798799	0.010908	0.948309	1.53672	1.54951	1.62587	0.807638	1.3051	1.31255	1.44405	True	False	False	False	False	False
miR-21-5p__mir-21__+1__-2__19M	hsa-mir-21	MI0000077	hsa-miR-21-5p	MIMAT0000076	1	-2	59841274	59841292	chr17	+	0	AGCTTATCAGACTGATGTT	AGCTTATCAGACTGATGTT	not reported	not reported	not reported	not reported	1.40218e-11	4.77803e-11	0.440336	0.929822	2.55211	1.45206	0.360411	1.58719	0.829639	1.20812	False	False	True	False	False	False
miR-182-5p__mir-182__0__-6__18M	hsa-mir-182	MI0000272	hsa-miR-182-5p	MIMAT0000259	0	-6	129770453	129770470	chr7	-	0	TTTGGCAATGGTAGAACT	TTTGGCAATGGTAGAACT	not reported	not reported	not reported	not reported	2.56276e-07	5.46832e-07	48.0289	56.8824	168.83	184.149	28.4212	96.4205	50.0912	112.335	False	False	True	False	False	False
miR-141-3p__mir-141__+3__+1__20M	hsa-mir-141	MI0000457	hsa-miR-141-3p	MIMAT0000432	3	1	6964158	6964177	chr12	+	0	CACTGTCTGGTAAAGATGGC	CACTGTCTGGTAAAGATGGC	not reported	not reported	not reported	not reported	3.93331e-13	1.8105e-12	0.104912	0.0396277	3.21495	1.82214	0.0920102	1.23052	0.0361909	0.668961	False	False	True	False	False	False
miR-34a-5p__mir-34a__-1__-1__22M	hsa-mir-34a	MI0000268	hsa-miR-34a-5p	MIMAT0000255	-1	-1	9151736	9151757	chr1	-	0	TTGGCAGTGTCTTAGCTGGTTG	TTGGCAGTGTCTTAGCTGGTTG	not reported	not reported	not reported	not reported	7.01678e-14	3.87288e-13	0.441887	0.323182	1.64796	1.8242	0.387096	1.38778	0.247154	1.56381	False	False	True	False	False	False
miR-99b-3p__mir-99b__0__-4__18M	hsa-mir-99b	MI0000746	hsa-miR-99b-3p	MIMAT0004678	0	-4	51692656	51692673	chr19	+	0	CAAGCTCGTGTCTGTGGG	CAAGCTCGTGTCTGTGGG	not reported	not reported	not reported	not reported	0.01773	0.0232058	4.36448	3.31511	7.43347	6.89283	3.71374	5.3953	3.09102	5.4418	False	False	True	False	False	False
miR-103a-1-5p__mir-103a-1__0__0__23M	hsa-mir-103a-1	MI0000109	hsa-miR-103a-1-5p	MIMAT0037306	0	0	168560941	168560963	chr5	-	0	GGCTTCTTTACAGTGCTGCCTTG	GGCTTCTTTACAGTGCTGCCTTG	not reported	not reported	not reported	not reported	2.54167e-17	2.55344e-16	0.812202	0.67544	4.52465	4.53959	0.630542	3.55537	0.476956	3.73352	False	False	True	False	False	False
miR-454-3p__mir-454__0__0__23M	hsa-mir-454	MI0003820	hsa-miR-454-3p	MIMAT0003885	0	0	59137787	59137809	chr17	-	0	TAGTGCAATATTGCTTATAGGGT	TAGTGCAATATTGCTTATAGGGT	not reported	not reported	not reported	not reported	5.56476e-09	1.4005e-08	0.85517	1.2477	2.14246	2.56955	0.726572	1.80321	1.20747	2.15189	False	False	True	False	False	False
miR-155-5p__mir-155__0__-7__17M	hsa-mir-155	MI0000681	hsa-miR-155-5p	MIMAT0000646	0	-7	25573983	25573999	chr21	+	0	TTAATGCTAATCGTGAT	TTAATGCTAATCGTGAT	not reported	not reported	not reported	not reported	3.88816e-09	9.93461e-09	9.93757	10.7586	33.5242	44.6106	5.75625	19.712	9.37005	27.2948	False	False	True	False	False	False
miR-148a-5p__mir-148a__0__-3__19M	hsa-mir-148a	MI0000253	hsa-miR-148a-5p	MIMAT0004549	0	-3	25949963	25949981	chr7	-	0	AAAGTTCTGAGACACTCCG	AAAGTTCTGAGACACTCCG	not reported	not reported	not reported	not reported	6.46672e-15	4.31935e-14	0.997665	1.39335	4.34737	5.31896	0.787825	3.32472	1.15488	4.17923	False	False	True	False	False	False
miR-4677-3p__mir-4677__0__0__22M	hsa-mir-4677	MI0017308	hsa-miR-4677-3p	MIMAT0019761	0	0	243346225	243346246	chr1	+	0	TCTGTGAGACCAAAGAACTACT	TCTGTGAGACCAAAGAACTACT	not reported	not reported	not reported	not reported	2.72825e-11	8.96528e-11	2.52233	2.7802	5.16151	7.35374	2.03966	4.43093	2.64644	6.27034	False	False	True	False	False	False
miR-199b-3p__mir-199b__-1__-3__20M	hsa-mir-199b	MI0000282	hsa-miR-199b-3p	MIMAT0004563	-1	-3	128244748	128244767	chr9	-	0	TACAGTAGTCTGCACATTGG	TACAGTAGTCTGCACATTGG	not reported	not reported	not reported	not reported	0.0231389	0.0298298	34.3299	41.768	54.7158	56.6975	21.8979	43.5816	38.6535	44.9648	False	False	True	False	False	False
miR-21-3p__mir-21__+2__+2__21M	hsa-mir-21	MI0000077	hsa-miR-21-3p	MIMAT0004494	2	2	59841313	59841333	chr17	+	0	ACACCAGTCGATGGGCTGTCT	ACACCAGTCGATGGGCTGTCT	not reported	not reported	not reported	not reported	4.00304e-18	4.61225e-17	0.340059	0.293329	2.57219	2.26487	0.259387	2.02362	0.253428	1.80821	False	False	True	False	False	False
miR-21-3p__mir-21__+1__-1__19M	hsa-mir-21	MI0000077	hsa-miR-21-3p	MIMAT0004494	1	-1	59841312	59841330	chr17	+	0	AACACCAGTCGATGGGCTG	AACACCAGTCGATGGGCTG	not reported	not reported	not reported	not reported	1.07275e-17	1.13983e-16	0.134037	0.149629	1.77514	1.43404	0.0979267	1.3137	0.129843	1.0767	False	False	True	False	False	False
miR-222-3p__mir-222__0__-2__19M	hsa-mir-222	MI0000299	hsa-miR-222-3p	MIMAT0000279	0	-2	45747038	45747056	chrX	-	0	AGCTACATCTGGCTACTGG	AGCTACATCTGGCTACTGG	not reported	not reported	not reported	not reported	0.0166643	0.0219747	5.47313	5.09635	6.01052	3.9544	4.81035	4.30965	4.8777	2.91662	False	False	False	True	False	False
miR-29b-3p__mir-29b-1__0__-4__19M	hsa-mir-29b-1	MI0000105	hsa-miR-29b-3p	MIMAT0000100	0	-4	130877471	130877489	chr7	-	0	TAGCACCATTTGAAATCAG	TAGCACCATTTGAAATCAG	not reported	not reported	not reported	not reported	2.99603e-05	5.28281e-05	39.6143	35.9536	68.7938	78.1621	21.9625	54.3311	31.7281	61.5389	False	False	True	False	False	False
miR-625-3p__mir-625__0__-3__19M	hsa-mir-625	MI0003639	hsa-miR-625-3p	MIMAT0004808	0	-3	65471153	65471171	chr14	+	0	GACTATAGAACTTTCCCCC	GACTATAGAACTTTCCCCC	not reported	not reported	not reported	not reported	1.66112e-09	4.41569e-09	2.1103	2.09892	7.00326	5.44012	1.78203	4.94178	1.73844	4.14479	False	False	True	False	False	False
miR-493-3p__mir-493__0__-1__21M	hsa-mir-493	MI0003132	hsa-miR-493-3p	MIMAT0003161	0	-1	100869116	100869136	chr14	+	0	TGAAGGTCTACTGTGTGCCAG	TGAAGGTCTACTGTGTGCCAG	not reported	not reported	not reported	not reported	0.000154547	0.000255982	0.725028	0.842692	2.99838	1.55837	0.629805	1.55234	0.709721	1.36173	False	False	True	False	False	False
miR-143-3p__mir-143__+1__-1__19M	hsa-mir-143	MI0000459	hsa-miR-143-3p	MIMAT0000435	1	-1	149428979	149428997	chr5	+	0	GAGATGAAGCACTGTAGCT	GAGATGAAGCACTGTAGCT	not reported	not reported	not reported	not reported	7.38151e-09	1.84014e-08	13.5284	12.6412	5.23614	2.70138	8.27628	2.59995	10.9125	2.04538	False	False	False	True	False	False
let-7g-5p__let-7g__0__-5__17M	hsa-let-7g	MI0000433	hsa-let-7g-5p	MIMAT0000414	0	-5	52268341	52268357	chr3	-	0	TGAGGTAGTAGTTTGTA	TGAGGTAGTAGTTTGTA	not reported	not reported	not reported	not reported	9.2669e-13	3.94084e-12	10.048	12.3916	3.29534	5.43021	6.64708	2.64018	10.546	4.45622	False	False	False	True	False	False
miR-361-3p__mir-361__0__+1__24M	hsa-mir-361	MI0000760	hsa-miR-361-3p	MIMAT0004682	0	1	85903640	85903663	chrX	-	0	TCCCCCAGGTGTGATTCTGATTTG	TCCCCCAGGTGTGATTCTGATTTG	not reported	not reported	not reported	not reported	1.23485e-08	3.02116e-08	11.7757	7.11634	21.8626	26.5455	8.46607	16.2606	6.93082	20.5596	False	False	True	False	False	False
miR-182-5p__mir-182__0__-3__21M	hsa-mir-182	MI0000272	hsa-miR-182-5p	MIMAT0000259	0	-3	129770450	129770470	chr7	-	0	TTTGGCAATGGTAGAACTCAC	TTTGGCAATGGTAGAACTCAC	not reported	not reported	not reported	not reported	2.56968e-17	2.57456e-16	585.72	597.655	2767.58	2545.89	378.571	1942.12	577.127	1987.77	False	False	True	False	False	False
miR-148a-3p__mir-148a__0__+2__24M	hsa-mir-148a	MI0000253	hsa-miR-148a-3p	MIMAT0000243	0	2	25949920	25949943	chr7	-	0	TCAGTGCACTACAGAACTTTGTCT	TCAGTGCACTACAGAACTTTGTCT	not reported	not reported	not reported	not reported	1.3777e-12	5.66284e-12	24.2908	31.5699	96.8872	104.684	19.9863	66.2957	29.913	71.9264	False	False	True	False	False	False
miR-3127-5p__mir-3127__0__-1__22M	hsa-mir-3127	MI0014144	hsa-miR-3127-5p	MIMAT0014990	0	-1	96798288	96798309	chr2	+	0	ATCAGGGCTTGTGGAATGGGAA	ATCAGGGCTTGTGGAATGGGAA	not reported	not reported	not reported	not reported	5.25322e-06	9.97354e-06	1.05679	0.296224	1.35217	1.63154	0.680809	1.11331	0.271269	1.35586	False	False	True	False	False	False
miR-140-5p__mir-140__0__0__22M	hsa-mir-140	MI0000456	hsa-miR-140-5p	MIMAT0000431	0	0	69933103	69933124	chr16	+	0	CAGTGGTTTTACCCTATGGTAG	CAGTGGTTTTACCCTATGGTAG	not reported	not reported	not reported	not reported	1.77925e-06	3.53263e-06	28.7202	34.8052	21.6385	26.1846	20.964	19.626	33.2767	23.2607	False	False	False	True	False	False
miR-192-5p__mir-192__0__-2__19M	hsa-mir-192	MI0000234	hsa-miR-192-5p	MIMAT0000222	0	-2	64891205	64891223	chr11	-	0	CTGACCTATGAATTGACAG	CTGACCTATGAATTGACAG	not reported	not reported	not reported	not reported	0.00344366	0.00494231	12.1007	14.7701	122.831	27.5024	8.21027	22.3432	11.1141	13.8019	False	False	True	False	False	False
miR-34a-5p__mir-34a__+1__+1__22M	hsa-mir-34a	MI0000268	hsa-miR-34a-5p	MIMAT0000255	1	1	9151734	9151755	chr1	-	0	GGCAGTGTCTTAGCTGGTTGTT	GGCAGTGTCTTAGCTGGTTGTT	not reported	not reported	not reported	not reported	3.09076e-15	2.1706e-14	0.358534	0.238167	1.94622	2.12273	0.304197	1.54331	0.204314	1.68233	False	False	True	False	False	False
miR-425-5p__mir-425__+1__+2__24M	hsa-mir-425	MI0001448	hsa-miR-425-5p	MIMAT0003393	1	2	49020197	49020220	chr3	-	0	ATGACACGATCACTCCCGTTGAGT	ATGACACGATCACTCCCGTTGAGT	not reported	not reported	not reported	not reported	1.29269e-12	5.34322e-12	1.61586	2.21883	5.7317	6.43785	1.3499	4.28557	1.80507	5.07816	False	False	True	False	False	False
let-7c-3p__let-7c__0__0__22M	hsa-let-7c	MI0000064	hsa-let-7c-3p	MIMAT0026472	0	0	16539883	16539904	chr21	+	0	CTGTACAACCTTCTAGCTTTCC	CTGTACAACCTTCTAGCTTTCC	not reported	not reported	not reported	not reported	0.0216523	0.0279818	2.25247	1.88936	4.91706	4.28848	1.93907	3.28564	1.79777	3.21325	False	False	True	False	False	False
miR-15a-5p__mir-15a__0__0__22M	hsa-mir-15a	MI0000069	hsa-miR-15a-5p	MIMAT0000068	0	0	50049167	50049188	chr13	-	0	TAGCAGCACATAATGGTTTGTG	TAGCAGCACATAATGGTTTGTG	not reported	not reported	not reported	not reported	1.23887e-09	3.35614e-09	8.17739	12.4274	16.3642	20.9214	6.14752	13.9799	11.7408	17.9983	False	False	True	False	False	False
miR-143-5p__mir-143__0__-2__20M	hsa-mir-143	MI0000459	hsa-miR-143-5p	MIMAT0004599	0	-2	149428944	149428963	chr5	+	0	GGTGCAGTGCTGCATCTCTG	GGTGCAGTGCTGCATCTCTG	not reported	not reported	not reported	not reported	7.29577e-13	3.16093e-12	0.444409	0.418717	3.76588	2.18911	0.31308	1.93766	0.362951	1.55593	False	False	True	False	False	False
miR-22-5p__mir-22__0__0__22M	hsa-mir-22	MI0000078	hsa-miR-22-5p	MIMAT0004495	0	0	1713952	1713973	chr17	-	0	AGTTCTTCAGTGGCAAGCTTTA	AGTTCTTCAGTGGCAAGCTTTA	not reported	not reported	not reported	not reported	1.10435e-07	2.44256e-07	4.59255	5.44859	9.49443	10.783	3.85504	7.84802	5.23129	9.02677	False	False	True	False	False	False
miR-30a-3p__mir-30a__+1__+1__22M	hsa-mir-30a	MI0000088	hsa-miR-30a-3p	MIMAT0000088	1	1	71403553	71403574	chr6	-	0	TTTCAGTCGGATGTTTGCAGCT	TTTCAGTCGGATGTTTGCAGCT	not reported	not reported	not reported	not reported	5.97967e-23	2.27289e-21	298.451	277.22	78.9114	68.227	276.529	57.8255	266.888	49.8853	False	False	False	True	False	False
miR-1180-3p__mir-1180__0__0__22M	hsa-mir-1180	MI0006273	hsa-miR-1180-3p	MIMAT0005825	0	0	19344513	19344534	chr17	-	0	TTTCCGGCTCGCGTGGGTGTGT	TTTCCGGCTCGCGTGGGTGTGT	not reported	not reported	not reported	not reported	0.000914845	0.00139555	13.0833	3.20862	9.65605	9.66547	5.96198	6.89759	2.9251	7.92824	False	False	True	False	False	False
miR-126-3p__mir-126__0__-2__20M	hsa-mir-126	MI0000471	hsa-miR-126-3p	MIMAT0000445	0	-2	136670653	136670672	chr9	+	0	TCGTACCGTGAGTAATAATG	TCGTACCGTGAGTAATAATG	not reported	not reported	not reported	not reported	4.81516e-06	9.17019e-06	89.9934	100.444	48.8622	43.6119	55.3787	37.8669	87.3146	36.6178	False	False	False	True	False	False
miR-23a-3p__mir-23a__+1__-3__17M	hsa-mir-23a	MI0000079	hsa-miR-23a-3p	MIMAT0000078	1	-3	13836598	13836614	chr19	-	0	TCACATTGCCAGGGATT	TCACATTGCCAGGGATT	not reported	not reported	not reported	not reported	0.00666431	0.00923747	6.32566	7.31513	11.9169	12.3011	4.60361	8.56176	6.6214	7.78014	False	False	True	False	False	False
miR-101-3p__mir-101-1__-1__-2__20M	hsa-mir-101-1	MI0000103	hsa-miR-101-3p	MIMAT0000099	-1	-2	65058444	65058463	chr1	-	0	GTACAGTACTGTGATAACTG	GTACAGTACTGTGATAACTG	not reported	not reported	not reported	not reported	3.32896e-07	7.00964e-07	128.764	145.554	225.693	166.09	75.8375	191.791	135.702	139.509	False	False	True	False	False	False
miR-10399-5p__mir-10399__0__0__21M	hsa-mir-10399	MI0033423	hsa-miR-10399-5p	MIMAT0041629	0	0	139044137	139044157	chr7	-	0	AATTACAGATTGTCTCAGAGA	AATTACAGATTGTCTCAGAGA	not reported	not reported	not reported	not reported	0.00214883	0.00315145	91.4318	90.5223	68.7253	57.3302	48.7907	54.4816	85.0523	48.1219	False	False	False	False	True	False
let-7i-5p__let-7i__0__-1__21M	hsa-let-7i	MI0000434	hsa-let-7i-5p	MIMAT0000415	0	-1	62603691	62603711	chr12	+	0	TGAGGTAGTAGTTTGTGCTGT	TGAGGTAGTAGTTTGTGCTGT	not reported	not reported	not reported	not reported	0.00199706	0.00294055	172.918	248.857	149.748	147.032	141.626	131.607	229.491	134.728	False	False	False	True	False	False
miR-99b-5p__mir-99b__0__0__22M	hsa-mir-99b	MI0000746	hsa-miR-99b-5p	MIMAT0000689	0	0	51692618	51692639	chr19	+	0	CACCCGTAGAACCGACCTTGCG	CACCCGTAGAACCGACCTTGCG	not reported	not reported	not reported	not reported	0.00602713	0.00841743	21981.5	7831.6	13331.3	13306.1	11935.5	11559.8	7662.8	12056	False	False	False	False	False	True
miR-193a-5p__mir-193a__0__-2__20M	hsa-mir-193a	MI0000487	hsa-miR-193a-5p	MIMAT0004614	0	-2	31560016	31560035	chr17	+	0	TGGGTCTTTGCGGGCGAGAT	TGGGTCTTTGCGGGCGAGAT	not reported	not reported	not reported	not reported	2.18809e-05	3.91246e-05	24.7411	7.51793	5.98013	4.77483	10.9087	4.80021	7.117	4.01197	False	False	False	True	False	False
miR-320a-3p__mir-320a__0__+2__24M	hsa-mir-320a	MI0000542	hsa-miR-320a-3p	MIMAT0000510	0	2	22244973	22244996	chr8	-	0	AAAAGCTGGGTTGAGAGGGCGAAA	AAAAGCTGGGTTGAGAGGGCGAAA	not reported	not reported	not reported	not reported	0.018402	0.0240511	16.3012	8.78336	12.1334	9.88652	12.6191	8.40023	8.28066	7.5348	False	True	False	False	False	False
miR-324-3p__mir-324__+1__0__22M	hsa-mir-324	MI0000813	hsa-miR-324-3p	MIMAT0000762	1	0	7223308	7223329	chr17	-	0	CCACTGCCCCAGGTGCTGCTGG	CCACTGCCCCAGGTGCTGCTGG	not reported	not reported	not reported	not reported	1.42131e-05	2.58655e-05	14.5807	6.43892	13.3182	12.9231	8.29991	11.3303	5.71446	11.5368	False	False	True	False	False	False
miR-29b-1-5p__mir-29b-1__0__-3__21M	hsa-mir-29b-1	MI0000105	hsa-miR-29b-1-5p	MIMAT0004514	0	-3	130877510	130877530	chr7	-	0	GCTGGTTTCATATGGTGGTTT	GCTGGTTTCATATGGTGGTTT	not reported	not reported	not reported	not reported	2.09758e-12	8.36989e-12	0.285377	0.100719	1.36771	1.3724	0.22968	1.08657	0.0919881	1.08446	False	False	True	False	False	False
let-7d-3p__let-7d__0__-1__21M	hsa-let-7d	MI0000065	hsa-let-7d-3p	MIMAT0004484	0	-1	94178895	94178915	chr9	+	0	CTATACGACCTGCTGCCTTTC	CTATACGACCTGCTGCCTTTC	not reported	not reported	not reported	not reported	1.10929e-08	2.7194e-08	519.214	119.122	81.9227	77.4928	180.148	71.3512	116.083	65.8414	False	False	False	True	False	False
miR-23a-3p__mir-23a__+1__+1__21M	hsa-mir-23a	MI0000079	hsa-miR-23a-3p	MIMAT0000078	1	1	13836594	13836614	chr19	-	0	TCACATTGCCAGGGATTTCCA	TCACATTGCCAGGGATTTCCA	not reported	not reported	not reported	not reported	1.4595e-07	3.1785e-07	28.71	35.7051	28.7023	17.0077	24.6191	20.7348	35.2251	13.4673	False	False	False	True	False	False
miR-589-5p__mir-589__0__-2__20M	hsa-mir-589	MI0003599	hsa-miR-589-5p	MIMAT0004799	0	-2	5495875	5495894	chr7	-	0	TGAGAACCACGTCTGCTCTG	TGAGAACCACGTCTGCTCTG	not reported	not reported	not reported	not reported	2.55512e-06	5.0057e-06	9.39753	3.57136	8.40832	9.33352	5.08035	7.10568	3.36535	7.32061	False	False	True	False	False	False
miR-378a-3p__mir-378a__0__-1__21M	hsa-mir-378a	MI0000786	hsa-miR-378a-3p	MIMAT0000732	0	-1	149732867	149732887	chr5	+	0	ACTGGACTTGGAGTCAGAAGG	ACTGGACTTGGAGTCAGAAGG	not reported	not reported	not reported	not reported	1.80169e-19	2.71136e-18	328.578	419.476	111.682	105.472	262.924	90.2131	375.341	85.6	False	False	False	True	False	False
miR-193b-3p__mir-193b__0__0__22M	hsa-mir-193b	MI0003137	hsa-miR-193b-3p	MIMAT0002819	0	0	14304017	14304038	chr16	+	0	AACTGGCCCTCAAAGTCCCGCT	AACTGGCCCTCAAAGTCCCGCT	not reported	not reported	not reported	not reported	2.94601e-13	1.39077e-12	21.0646	5.58022	44.4535	78.3655	9.30601	27.5537	5.40268	43.1201	False	False	True	False	False	False
miR-148a-3p__mir-148a__+3__-1__18M	hsa-mir-148a	MI0000253	hsa-miR-148a-3p	MIMAT0000243	3	-1	25949923	25949940	chr7	-	0	GTGCACTACAGAACTTTG	GTGCACTACAGAACTTTG	not reported	not reported	not reported	not reported	9.12377e-15	5.91201e-14	0.348469	0.536029	4.40388	4.78062	0.299924	2.47012	0.46972	2.78804	False	False	True	False	False	False
miR-342-3p__mir-342__+2__+1__22M	hsa-mir-342	MI0000805	hsa-miR-342-3p	MIMAT0000753	2	1	100109717	100109738	chr14	+	0	TCACACAGAAATCGCACCCGTC	TCACACAGAAATCGCACCCGTC	not reported	not reported	not reported	not reported	1.36034e-07	2.97162e-07	3.9064	3.77611	2.16787	2.25619	3.43227	1.85955	3.56368	1.96618	False	False	False	True	False	False
miR-21-5p__mir-21__0__0__22M	hsa-mir-21	MI0000077	hsa-miR-21-5p	MIMAT0000076	0	0	59841273	59841294	chr17	+	0	TAGCTTATCAGACTGATGTTGA	TAGCTTATCAGACTGATGTTGA	not reported	not reported	not reported	not reported	4.17918e-23	1.83436e-21	64568.5	82517.1	253605	258881	28732.8	228734	80272.6	234013	False	False	True	False	False	False
miR-15a-5p__mir-15a__0__-1__21M	hsa-mir-15a	MI0000069	hsa-miR-15a-5p	MIMAT0000068	0	-1	50049168	50049188	chr13	-	0	TAGCAGCACATAATGGTTTGT	TAGCAGCACATAATGGTTTGT	not reported	not reported	not reported	not reported	0.00735242	0.0101	24.1049	34.6692	28.6608	37.5412	17.249	25.8647	32.8196	32.3138	False	False	False	False	True	False
miR-146b-5p__mir-146b__+5__+1__19M	hsa-mir-146b	MI0003129	hsa-miR-146b-5p	MIMAT0002809	5	1	102436525	102436543	chr10	+	0	ACTGAATTCCATAGGCTGT	ACTGAATTCCATAGGCTGT	not reported	not reported	not reported	not reported	1.49345e-08	3.62259e-08	8.89455	8.30387	4.95192	5.01751	6.77087	2.80816	7.75288	1.9197	False	False	False	True	False	False
miR-193b-3p__mir-193b__0__+1__23M	hsa-mir-193b	MI0003137	hsa-miR-193b-3p	MIMAT0002819	0	1	14304017	14304039	chr16	+	0	AACTGGCCCTCAAAGTCCCGCTT	AACTGGCCCTCAAAGTCCCGCTT	not reported	not reported	not reported	not reported	8.78998e-05	0.000149971	1.36016	0.290887	1.56825	3.22869	0.79183	1.06901	0.281923	1.93521	False	False	True	False	False	False
miR-423-5p__mir-423__0__-2__21M	hsa-mir-423	MI0001445	hsa-miR-423-5p	MIMAT0004748	0	-2	30117095	30117115	chr17	+	0	TGAGGGGCAGAGAGCGAGACT	TGAGGGGCAGAGAGCGAGACT	not reported	not reported	not reported	not reported	4.08471e-16	3.32457e-15	52.6215	21.9096	10.0874	8.96235	29.0338	7.70936	20.1229	7.59353	False	False	False	True	False	False
miR-29a-3p__mir-29a__-1__-7__16M	hsa-mir-29a	MI0000087	hsa-miR-29a-3p	MIMAT0000086	-1	-7	130876755	130876770	chr7	-	0	CTAGCACCATCTGAAA	CTAGCACCATCTGAAA	not reported	not reported	not reported	not reported	0.00051234	0.000803145	3.00224	2.81653	10.2778	5.03212	2.71375	4.14013	2.62167	4.48376	False	False	True	False	False	False
miR-195-3p__mir-195__0__0__22M	hsa-mir-195	MI0000489	hsa-miR-195-3p	MIMAT0004615	0	0	7017628	7017649	chr17	-	0	CCAATATTGGCTGTGCTGCTCC	CCAATATTGGCTGTGCTGCTCC	not reported	not reported	not reported	not reported	1.73604e-07	3.76738e-07	3.3669	2.1561	1.32835	1.55347	2.57581	1.14652	1.98081	1.33488	False	False	False	True	False	False
miR-10a-5p__mir-10a__+2__-2__19M	hsa-mir-10a	MI0000266	hsa-miR-10a-5p	MIMAT0000253	2	-2	48579906	48579924	chr17	-	0	CCCTGTAGATCCGAATTTG	CCCTGTAGATCCGAATTTG	not reported	not reported	not reported	not reported	0.000167745	0.000276599	3.97892	2.81017	8.68323	5.64424	2.95619	5.31098	2.43345	3.39927	False	False	True	False	False	False
miR-340-3p__mir-340__0__+1__23M	hsa-mir-340	MI0000802	hsa-miR-340-3p	MIMAT0000750	0	1	180015318	180015340	chr5	-	0	TCCGTCTCAGTTACTTTATAGCC	TCCGTCTCAGTTACTTTATAGCC	not reported	not reported	not reported	not reported	0.000279343	0.000449755	0.958538	2.16098	1.77154	1.95859	0.839083	1.50362	2.00219	1.64611	False	False	False	False	True	False
miR-30d-5p__mir-30d__0__-3__19M	hsa-mir-30d	MI0000255	hsa-miR-30d-5p	MIMAT0000245	0	-3	134804922	134804940	chr8	-	0	TGTAAACATCCCCGACTGG	TGTAAACATCCCCGACTGG	not reported	not reported	not reported	not reported	0.00183711	0.00271539	850.131	844.559	760.204	638.407	732.99	449.009	807.84	452.602	False	False	False	True	False	False
miR-451a__mir-451a__0__-3__19M	hsa-mir-451a	MI0001729	hsa-miR-451a	MIMAT0001631	0	-3	28861406	28861424	chr17	-	0	AAACCGTTACCATTACTGA	AAACCGTTACCATTACTGA	not reported	not reported	not reported	not reported	2.07019e-14	1.28498e-13	60.4626	83.1598	6.7676	7.58845	30.2039	4.1987	52.6594	3.91211	False	False	False	True	False	False
miR-29a-3p__mir-29a__0__-1__21M	hsa-mir-29a	MI0000087	hsa-miR-29a-3p	MIMAT0000086	0	-1	130876749	130876769	chr7	-	0	TAGCACCATCTGAAATCGGTT	TAGCACCATCTGAAATCGGTT	not reported	not reported	not reported	not reported	0.000239613	0.000388502	7976.9	8220.84	6154.28	7203.3	7031.36	5196.23	7755.6	6213.02	False	False	False	True	False	False
miR-425-3p__mir-425__-1__-1__22M	hsa-mir-425	MI0001448	hsa-miR-425-3p	MIMAT0001343	-1	-1	49020160	49020181	chr3	-	0	CATCGGGAATGTCGTGTCCGCC	CATCGGGAATGTCGTGTCCGCC	not reported	not reported	not reported	not reported	0.00248821	0.00362101	1.53462	1.2922	1.94768	2.21982	1.19494	1.68429	1.15775	1.91806	False	False	True	False	False	False
miR-766-3p__mir-766__0__0__22M	hsa-mir-766	MI0003836	hsa-miR-766-3p	MIMAT0003888	0	0	119646763	119646784	chrX	-	0	ACTCCAGCCCCACAGCCTCAGC	ACTCCAGCCCCACAGCCTCAGC	not reported	not reported	not reported	not reported	9.71928e-09	2.39059e-08	10.4012	0.887412	4.41318	4.67861	2.57303	3.51885	0.841754	3.89636	False	False	True	False	False	False
miR-4326__mir-4326__0__+4__24M	hsa-mir-4326	MI0015866	hsa-miR-4326	MIMAT0016888	0	4	63286818	63286841	chr20	+	0	TGTTCCTCTGTCTCCCAGACTCTG	TGTTCCTCTGTCTCCCAGACTCTG	not reported	not reported	not reported	not reported	0.000596032	0.000928028	1.65005	0.191699	2.53223	3.10331	0.859857	1.6823	0.17533	1.75871	False	False	True	False	False	False
miR-146a-5p__mir-146a__0__-5__17M	hsa-mir-146a	MI0000477	hsa-miR-146a-5p	MIMAT0000449	0	-5	160485372	160485388	chr5	+	0	TGAGAACTGAATTCCAT	TGAGAACTGAATTCCAT	not reported	not reported	not reported	not reported	0.00341465	0.00490449	29.696	35.5177	57.7984	83.3281	17.0015	33.8846	33.2	44.0115	False	False	True	False	False	False
miR-766-3p__mir-766__0__-1__21M	hsa-mir-766	MI0003836	hsa-miR-766-3p	MIMAT0003888	0	-1	119646764	119646784	chrX	-	0	ACTCCAGCCCCACAGCCTCAG	ACTCCAGCCCCACAGCCTCAG	not reported	not reported	not reported	not reported	8.84761e-08	1.98064e-07	4.05968	0.493566	2.82557	2.98914	1.48167	2.3312	0.444832	2.61301	False	False	True	False	False	False
miR-183-5p__mir-183__0__+2__24M	hsa-mir-183	MI0000273	hsa-miR-183-5p	MIMAT0000261	0	2	129774965	129774988	chr7	-	0	TATGGCACTGGTAGAATTCACTGT	TATGGCACTGGTAGAATTCACTGT	not reported	not reported	not reported	not reported	2.10002e-25	9.60095e-23	10.7875	10.47	152.366	163.241	9.54151	89.511	10.0304	109.962	False	False	True	False	False	False
miR-374a-3p__mir-374a__0__-1__21M	hsa-mir-374a	MI0000782	hsa-miR-374a-3p	MIMAT0004688	0	-1	74287296	74287316	chrX	-	0	CTTATCAGATTGTATTGTAAT	CTTATCAGATTGTATTGTAAT	not reported	not reported	not reported	not reported	1.36048e-07	2.97162e-07	118.297	123.829	52.6584	57.5469	49.0673	45.2119	113.335	50.2304	False	False	False	True	False	False
let-7a-5p__let-7a-1__+3__-1__18M	hsa-let-7a-1	MI0000060	hsa-let-7a-5p	MIMAT0000062	3	-1	94175965	94175982	chr9	+	0	GGTAGTAGGTTGTATAGT	GGTAGTAGGTTGTATAGT	not reported	not reported	not reported	not reported	2.36404e-09	6.16027e-09	15.1934	8.70731	5.26209	4.24699	10.4599	3.90577	6.25212	2.50763	False	False	False	True	False	False
miR-182-5p__mir-182__+1__+1__24M	hsa-mir-182	MI0000272	hsa-miR-182-5p	MIMAT0000259	1	1	129770446	129770469	chr7	-	0	TTGGCAATGGTAGAACTCACACTG	TTGGCAATGGTAGAACTCACACTG	not reported	not reported	not reported	not reported	8.11325e-21	1.63462e-19	0.0790487	0	1.80198	1.81881	0.0698397	1.31955	0	1.37104	False	False	True	False	False	False
miR-1843__mir-1843__-1__+1__22M	hsa-mir-1843	MI0032314	hsa-miR-1843	MIMAT0039764	-1	1	175968439	175968460	chr1	-	0	ATATGGAGGTCTCTGTCTGGCT	ATATGGAGGTCTCTGTCTGGCT	not reported	not reported	not reported	not reported	0.012078	0.0161933	1.99615	1.41223	1.91837	1.43035	1.76306	1.67654	1.11428	1.23988	False	False	False	False	False	True
miR-199a-5p__mir-199a-1__+1__0__22M	hsa-mir-199a-1	MI0000242	hsa-miR-199a-5p	MIMAT0000231	1	0	10817469	10817490	chr19	-	0	CCAGTGTTCAGACTACCTGTTC	CCAGTGTTCAGACTACCTGTTC	not reported	not reported	not reported	not reported	5.50308e-11	1.74012e-10	0.845614	0.767229	5.34794	2.87558	0.726476	3.02161	0.693333	1.46283	False	False	True	False	False	False
miR-331-3p__mir-331__0__0__21M	hsa-mir-331	MI0000812	hsa-miR-331-3p	MIMAT0000760	0	0	95308480	95308500	chr12	+	0	GCCCCTGGGCCTATCCTAGAA	GCCCCTGGGCCTATCCTAGAA	not reported	not reported	not reported	not reported	5.08875e-11	1.61326e-10	7.94052	2.5242	10.8279	11.1948	3.71794	8.74208	2.46778	9.81896	False	False	True	False	False	False
miR-625-5p__mir-625__0__-1__20M	hsa-mir-625	MI0003639	hsa-miR-625-5p	MIMAT0003294	0	-1	65471116	65471135	chr14	+	0	AGGGGGAAAGTTCTATAGTC	AGGGGGAAAGTTCTATAGTC	not reported	not reported	not reported	not reported	1.09356e-08	2.6826e-08	0.555172	0.554909	1.60147	1.69245	0.459491	1.29322	0.461353	1.42044	False	False	True	False	False	False
miR-199b-3p__mir-199b__0__0__22M	hsa-mir-199b	MI0000282	hsa-miR-199b-3p	MIMAT0004563	0	0	128244745	128244766	chr9	-	0	ACAGTAGTCTGCACATTGGTTA	ACAGTAGTCTGCACATTGGTTA	not reported	not reported	not reported	not reported	1.89967e-05	3.4233e-05	91.3071	113.744	168.028	169.193	74.2349	139.184	111.506	146.041	False	False	True	False	False	False
miR-30e-5p__mir-30e__+1__-5__16M	hsa-mir-30e	MI0000749	hsa-miR-30e-5p	MIMAT0000692	1	-5	40754372	40754387	chr1	+	0	GTAAACATCCTTGACT	GTAAACATCCTTGACT	not reported	not reported	not reported	not reported	9.77828e-07	1.96793e-06	1.61031	1.30525	9.37902	4.05384	1.31921	3.90736	1.09262	3.05537	False	False	True	False	False	False
miR-26a-5p__mir-26a-1__+5__0__17M	hsa-mir-26a-1	MI0000083	hsa-miR-26a-5p	MIMAT0000082	5	0	37969418	37969434	chr3	+	0	GTAATCCAGGATAGGCT	GTAATCCAGGATAGGCT	not reported	not reported	not reported	not reported	0.000555817	0.000869082	2.0216	2.26522	12.6335	5.45586	1.48521	3.32753	1.74743	1.6363	False	False	False	False	True	False
miR-195-5p__mir-195__0__-2__19M	hsa-mir-195	MI0000489	hsa-miR-195-5p	MIMAT0000461	0	-2	7017669	7017687	chr17	-	0	TAGCAGCACAGAAATATTG	TAGCAGCACAGAAATATTG	not reported	not reported	not reported	not reported	5.29354e-10	1.49215e-09	9.97087	8.48239	2.81171	2.09005	6.0159	2.07957	7.26788	1.65442	False	False	False	True	False	False
miR-107__mir-107__0__-6__17M	hsa-mir-107	MI0000114	hsa-miR-107	MIMAT0000104	0	-6	89592762	89592778	chr10	-	0	AGCAGCATTGTACAGGG	AGCAGCATTGTACAGGG	not reported	not reported	not reported	not reported	4.79438e-07	9.93641e-07	52.7135	62.5478	35.9617	51.3433	16.6836	28.8061	29.8637	40.3136	True	False	False	False	False	False
miR-130b-5p__mir-130b__0__+1__22M	hsa-mir-130b	MI0000748	hsa-miR-130b-5p	MIMAT0004680	0	1	21653316	21653337	chr22	+	0	ACTCTTTCCCTGTTGCACTACT	ACTCTTTCCCTGTTGCACTACT	not reported	not reported	not reported	not reported	8.44312e-13	3.61554e-12	3.46545	1.25421	8.97336	8.51931	1.83503	6.44803	1.08065	6.85613	False	False	True	False	False	False
miR-146b-5p__mir-146b__+3__+1__21M	hsa-mir-146b	MI0003129	hsa-miR-146b-5p	MIMAT0002809	3	1	102436523	102436543	chr10	+	0	GAACTGAATTCCATAGGCTGT	GAACTGAATTCCATAGGCTGT	not reported	not reported	not reported	not reported	9.77061e-05	0.00016601	2.71642	2.51455	2.21713	2.15159	2.29039	1.63192	2.33212	1.1659	False	False	False	True	False	False
miR-181a-5p__mir-181a-1__0__-4__19M	hsa-mir-181a-1	MI0000289	hsa-miR-181a-5p	MIMAT0000256	0	-4	198859112	198859130	chr1	-	0	AACATTCAACGCTGTCGGT	AACATTCAACGCTGTCGGT	not reported	not reported	not reported	not reported	2.92074e-06	5.69475e-06	46.7003	48.6411	30.4668	29.4835	39.6854	23.3509	44.0015	24.4922	False	False	False	True	False	False
miR-10401-3p__mir-10401__-1__-1__21M	hsa-mir-10401	MI0033425	hsa-miR-10401-3p	MIMAT0041634	-1	-1	8206597	8206617	chr21	+	0	GACCTCGCCGTCCCGCCCGCC	GACCTCGCCGTCCCGCCCGCC	not reported	not reported	not reported	not reported	7.20005e-12	2.56985e-11	11.5166	0.714579	13.5067	10.1111	2.06112	7.66672	0.624451	7.46886	False	False	True	False	False	False
miR-125a-5p__mir-125a__0__-8__16M	hsa-mir-125a	MI0000469	hsa-miR-125a-5p	MIMAT0000443	0	-8	51693268	51693283	chr19	+	0	TCCCTGAGACCCTTTA	TCCCTGAGACCCTTTA	not reported	not reported	not reported	not reported	0.0154855	0.0205009	4.35714	1.48726	4.14287	1.86597	2.94867	1.79221	1.23902	1.53447	False	False	False	False	False	True
miR-17-3p__mir-17__0__-2__20M	hsa-mir-17	MI0000071	hsa-miR-17-3p	MIMAT0000071	0	-2	91350655	91350674	chr13	+	0	ACTGCAGTGAAGGCACTTGT	ACTGCAGTGAAGGCACTTGT	not reported	not reported	not reported	not reported	5.71606e-07	1.17607e-06	1.65006	1.95615	7.00027	4.11373	1.48698	4.04811	1.83279	2.98266	False	False	True	False	False	False
miR-223-3p__mir-223__0__0__22M	hsa-mir-223	MI0000300	hsa-miR-223-3p	MIMAT0000280	0	0	66018937	66018958	chrX	+	0	TGTCAGTTTGTCAAATACCCCA	TGTCAGTTTGTCAAATACCCCA	not reported	not reported	not reported	not reported	9.29073e-05	0.000158002	224.332	367.228	145.007	174.983	148.225	102.113	299.571	108.053	False	False	False	True	False	False
miR-454-3p__mir-454__0__-2__21M	hsa-mir-454	MI0003820	hsa-miR-454-3p	MIMAT0003885	0	-2	59137789	59137809	chr17	-	0	TAGTGCAATATTGCTTATAGG	TAGTGCAATATTGCTTATAGG	not reported	not reported	not reported	not reported	1.34957e-07	2.95129e-07	0.578654	0.774045	1.29989	1.75445	0.485122	1.11905	0.705344	1.48034	False	False	True	False	False	False
miR-155-5p__mir-155__0__-8__16M	hsa-mir-155	MI0000681	hsa-miR-155-5p	MIMAT0000646	0	-8	25573983	25573998	chr21	+	0	TTAATGCTAATCGTGA	TTAATGCTAATCGTGA	not reported	not reported	not reported	not reported	0.00570186	0.00799952	1.66317	1.36295	4.77281	2.65156	1.22326	2.33702	1.29836	2.14779	False	False	True	False	False	False
miR-196a-5p__mir-196a-1__0__0__22M	hsa-mir-196a-1	MI0000238	hsa-miR-196a-5p	MIMAT0000226	0	0	48632532	48632553	chr17	-	0	TAGGTAGTTTCATGTTGTTGGG	TAGGTAGTTTCATGTTGTTGGG	not reported	not reported	not reported	not reported	3.49243e-11	1.12953e-10	0.499491	0.102133	24.2949	18.2689	0.237512	4.32764	0.0926774	2.47234	False	False	True	False	False	False
miR-23a-3p__mir-23a__+1__-1__19M	hsa-mir-23a	MI0000079	hsa-miR-23a-3p	MIMAT0000078	1	-1	13836596	13836614	chr19	-	0	TCACATTGCCAGGGATTTC	TCACATTGCCAGGGATTTC	not reported	not reported	not reported	not reported	0.00750397	0.0102852	15.5674	13.8942	15.6935	10.8916	12.341	10.5124	13.0041	7.02793	False	False	False	True	False	False
miR-182-5p__mir-182__0__0__24M	hsa-mir-182	MI0000272	hsa-miR-182-5p	MIMAT0000259	0	0	129770447	129770470	chr7	-	0	TTTGGCAATGGTAGAACTCACACT	TTTGGCAATGGTAGAACTCACACT	not reported	not reported	not reported	not reported	2.38665e-23	1.20458e-21	456.416	549.344	3322.11	3802.47	318.213	2352.41	511.764	2787.24	False	False	True	False	False	False
miR-130b-5p__mir-130b__0__0__21M	hsa-mir-130b	MI0000748	hsa-miR-130b-5p	MIMAT0004680	0	0	21653316	21653336	chr22	+	0	ACTCTTTCCCTGTTGCACTAC	ACTCTTTCCCTGTTGCACTAC	not reported	not reported	not reported	not reported	1.70015e-11	5.74034e-11	0.870319	0.254205	2.35508	2.18462	0.556529	1.74208	0.239401	1.81354	False	False	True	False	False	False
miR-181a-5p__mir-181a-1__0__+1__24M	hsa-mir-181a-1	MI0000289	hsa-miR-181a-5p	MIMAT0000256	0	1	198859107	198859130	chr1	-	0	AACATTCAACGCTGTCGGTGAGTT	AACATTCAACGCTGTCGGTGAGTT	not reported	not reported	not reported	not reported	0.00529485	0.00744266	22.8485	12.3693	24.0867	29.6775	13.6404	17.5799	11.6386	21.6232	False	False	True	False	False	False
miR-191-5p__mir-191__0__-1__22M	hsa-mir-191	MI0000465	hsa-miR-191-5p	MIMAT0000440	0	-1	49020673	49020694	chr3	-	0	CAACGGAATCCCAAAAGCAGCT	CAACGGAATCCCAAAAGCAGCT	not reported	not reported	not reported	not reported	9.54489e-10	2.62431e-09	102.654	72.6795	169.567	200.761	84.7334	145.663	70.1941	165.386	False	False	True	False	False	False
miR-148a-3p__mir-148a__+1__-2__19M	hsa-mir-148a	MI0000253	hsa-miR-148a-3p	MIMAT0000243	1	-2	25949924	25949942	chr7	-	0	CAGTGCACTACAGAACTTT	CAGTGCACTACAGAACTTT	not reported	not reported	not reported	not reported	0.00190654	0.00281177	1.21481	1.1242	4.30262	2.45483	1.01906	2.38106	1.07071	1.42654	False	False	True	False	False	False
miR-183-5p__mir-183__0__-6__16M	hsa-mir-183	MI0000273	hsa-miR-183-5p	MIMAT0000261	0	-6	129774973	129774988	chr7	-	0	TATGGCACTGGTAGAA	TATGGCACTGGTAGAA	not reported	not reported	not reported	not reported	1.32449e-17	1.3834e-16	2.38671	2.4729	41.31	17.0287	1.96061	10.1685	1.97821	10.5148	False	False	True	False	False	False
miR-574-5p__mir-574__0__0__23M	hsa-mir-574	MI0003581	hsa-miR-574-5p	MIMAT0004795	0	0	38868056	38868078	chr4	+	0	TGAGTGTGTGTGTGTGAGTGTGT	TGAGTGTGTGTGTGTGAGTGTGT	not reported	not reported	not reported	not reported	4.76363e-06	9.08144e-06	3.79632	1.95973	6.50204	8.72705	2.15789	4.4351	1.70016	5.45533	False	False	True	False	False	False
miR-3613-5p__mir-3613__0__-4__18M	hsa-mir-3613	MI0016003	hsa-miR-3613-5p	MIMAT0017990	0	-4	49996469	49996486	chr13	-	0	TGTTGTACTTTTTTTTTT	TGTTGTACTTTTTTTTTT	not reported	not reported	not reported	not reported	0.0116603	0.0156618	1.44317	2.11082	1.33558	1.78899	1.14828	1.07008	1.86138	1.51152	False	False	False	True	False	False
miR-101-3p__mir-101-1__+1__-1__19M	hsa-mir-101-1	MI0000103	hsa-miR-101-3p	MIMAT0000099	1	-1	65058443	65058461	chr1	-	0	ACAGTACTGTGATAACTGA	ACAGTACTGTGATAACTGA	not reported	not reported	not reported	not reported	7.82418e-08	1.76439e-07	2.90194	3.18678	1.53169	0.921771	2.24475	1.05317	2.79594	0.728658	False	False	False	True	False	False
miR-192-5p__mir-192__0__0__21M	hsa-mir-192	MI0000234	hsa-miR-192-5p	MIMAT0000222	0	0	64891203	64891223	chr11	-	0	CTGACCTATGAATTGACAGCC	CTGACCTATGAATTGACAGCC	not reported	not reported	not reported	not reported	3.0305e-05	5.34105e-05	115.253	92.8599	685.173	246.503	57.9335	177.913	83.1243	114.163	False	False	True	False	False	False
miR-146a-5p__mir-146a__0__-2__20M	hsa-mir-146a	MI0000477	hsa-miR-146a-5p	MIMAT0000449	0	-2	160485372	160485391	chr5	+	0	TGAGAACTGAATTCCATGGG	TGAGAACTGAATTCCATGGG	not reported	not reported	not reported	not reported	0.0238885	0.0307531	6.6012	11.322	6.82208	7.10199	5.53916	5.04505	11.0686	5.42254	False	False	False	True	False	False
miR-22-3p__mir-22__+2__+1__21M	hsa-mir-22	MI0000078	hsa-miR-22-3p	MIMAT0000077	2	1	1713913	1713933	chr17	-	0	GCTGCCAGTTGAAGAACTGTT	GCTGCCAGTTGAAGAACTGTT	not reported	not reported	not reported	not reported	4.75536e-07	9.86663e-07	0.498792	0.736057	1.84129	1.07167	0.429963	1.20731	0.67383	0.77898	False	False	True	False	False	False
miR-328-3p__mir-328__0__-3__19M	hsa-mir-328	MI0000804	hsa-miR-328-3p	MIMAT0000752	0	-3	67202330	67202348	chr16	-	0	CTGGCCCTCTCTGCCCTTC	CTGGCCCTCTCTGCCCTTC	not reported	not reported	not reported	not reported	0.00103831	0.00157153	3.01265	0.243271	1.33362	1.23175	1.02969	1.05213	0.206219	0.986016	False	False	True	False	False	False
miR-625-3p__mir-625__0__-4__18M	hsa-mir-625	MI0003639	hsa-miR-625-3p	MIMAT0004808	0	-4	65471153	65471170	chr14	+	0	GACTATAGAACTTTCCCC	GACTATAGAACTTTCCCC	not reported	not reported	not reported	not reported	7.35329e-06	1.37204e-05	1.73382	1.54331	5.02658	3.30474	1.22176	3.17664	1.37968	1.98693	False	False	True	False	False	False
miR-335-3p__mir-335__0__-1__21M	hsa-mir-335	MI0000816	hsa-miR-335-3p	MIMAT0004703	0	-1	130496162	130496182	chr7	+	0	TTTTTCATTATTGCTCCTGAC	TTTTTCATTATTGCTCCTGAC	not reported	not reported	not reported	not reported	2.0902e-05	3.74287e-05	6.0594	7.34466	13.6153	14.7712	4.88896	10.1567	6.14259	10.5008	False	False	True	False	False	False
miR-101-3p__mir-101-1__+3__-1__17M	hsa-mir-101-1	MI0000103	hsa-miR-101-3p	MIMAT0000099	3	-1	65058443	65058459	chr1	-	0	AGTACTGTGATAACTGA	AGTACTGTGATAACTGA	not reported	not reported	not reported	not reported	0.000202231	0.000330655	2.74933	2.96899	1.33122	1.06711	1.7853	1.01746	2.69144	0.723722	False	False	False	True	False	False
miR-3074-5p__mir-3074__0__+1__22M	hsa-mir-3074	MI0014181	hsa-miR-3074-5p	MIMAT0019208	0	1	95086062	95086083	chr9	-	0	GTTCCTGCTGAACTGAGCCAGT	GTTCCTGCTGAACTGAGCCAGT	not reported	not reported	not reported	not reported	9.71112e-07	1.95548e-06	3.52975	0.415108	2.47026	2.50709	1.26421	1.81168	0.390624	1.98097	False	False	True	False	False	False
miR-210-3p__mir-210__-1__0__23M	hsa-mir-210	MI0000286	hsa-miR-210-3p	MIMAT0000267	-1	0	568112	568134	chr11	-	0	ACTGTGCGTGTGACAGCGGCTGA	ACTGTGCGTGTGACAGCGGCTGA	not reported	not reported	not reported	not reported	6.38799e-21	1.31578e-19	0.308295	0.0312528	5.64676	7.15289	0.215539	3.53744	0.0290582	4.64141	False	False	True	False	False	False
miR-181c-5p__mir-181c__0__-6__16M	hsa-mir-181c	MI0000271	hsa-miR-181c-5p	MIMAT0000258	0	-6	13874725	13874740	chr19	+	0	AACATTCAACCTGTCG	AACATTCAACCTGTCG	not reported	not reported	not reported	not reported	0.00858715	0.0116916	2.82336	3.50992	2.26225	1.85778	2.35111	1.7199	2.97621	1.49177	False	False	False	True	False	False
miR-146b-5p__mir-146b__0__-1__22M	hsa-mir-146b	MI0003129	hsa-miR-146b-5p	MIMAT0002809	0	-1	102436520	102436541	chr10	+	0	TGAGAACTGAATTCCATAGGCT	TGAGAACTGAATTCCATAGGCT	not reported	not reported	not reported	not reported	0.000939377	0.0014306	369.117	507.267	281.891	285.912	221.536	228.477	463.191	224.366	False	False	False	False	True	False
miR-1299__mir-1299__0__0__22M	hsa-mir-1299	MI0006359	hsa-miR-1299	MIMAT0005887	0	0	40929010	40929031	chr9	-	0	TTCTGGAATTCTGTGTGAGGGA	TTCTGGAATTCTGTGTGAGGGA	not reported	not reported	not reported	not reported	2.25728e-05	4.02836e-05	10.5315	56.0926	8.03714	16.182	4.07068	3.46711	29.4092	7.71926	False	False	False	True	False	False
miR-205-5p__mir-205__0__0__22M	hsa-mir-205	MI0000285	hsa-miR-205-5p	MIMAT0000266	0	0	209432166	209432187	chr1	+	0	TCCTTCATTCCACCGGAGTCTG	TCCTTCATTCCACCGGAGTCTG	not reported	not reported	not reported	not reported	0.00293064	0.00423239	40.9836	6.83372	262.697	200.429	12.7617	35.997	5.47798	40.6658	False	False	True	False	False	False
miR-199a-5p__mir-199a-1__0__-3__20M	hsa-mir-199a-1	MI0000242	hsa-miR-199a-5p	MIMAT0000231	0	-3	10817472	10817491	chr19	-	0	CCCAGTGTTCAGACTACCTG	CCCAGTGTTCAGACTACCTG	not reported	not reported	not reported	not reported	0.000582239	0.000907319	17.0785	16.9092	31.8906	23.5991	14.8373	22.1725	15.8389	16.2634	False	False	True	False	False	False
miR-140-3p__mir-140__+3__+3__21M	hsa-mir-140	MI0000456	hsa-miR-140-3p	MIMAT0004597	3	3	69933145	69933165	chr16	+	0	CACAGGGTAGAACCACGGACA	CACAGGGTAGAACCACGGACA	not reported	not reported	not reported	not reported	3.79176e-15	2.62786e-14	6.1207	6.08571	3.1551	2.81578	5.63696	2.81615	6.03789	2.50315	False	False	False	True	False	False
miR-375-3p__mir-375__0__-4__18M	hsa-mir-375	MI0000783	hsa-miR-375-3p	MIMAT0000728	0	-4	219001652	219001669	chr2	-	0	TTTGTTCGTTCGGCTCGC	TTTGTTCGTTCGGCTCGC	not reported	not reported	not reported	not reported	1.19525e-07	2.63412e-07	248.68	125.577	847.844	823.381	119.669	304.148	113.905	304.12	False	False	True	False	False	False
miR-146b-5p__mir-146b__0__-2__21M	hsa-mir-146b	MI0003129	hsa-miR-146b-5p	MIMAT0002809	0	-2	102436520	102436540	chr10	+	0	TGAGAACTGAATTCCATAGGC	TGAGAACTGAATTCCATAGGC	not reported	not reported	not reported	not reported	8.17469e-09	2.02418e-08	110.076	138.793	56.9983	44.824	60.149	43.6591	132.156	37.4233	False	False	False	True	False	False
miR-183-5p__mir-183__0__-3__19M	hsa-mir-183	MI0000273	hsa-miR-183-5p	MIMAT0000261	0	-3	129774970	129774988	chr7	-	0	TATGGCACTGGTAGAATTC	TATGGCACTGGTAGAATTC	not reported	not reported	not reported	not reported	2.12724e-19	3.11235e-18	74.1011	90.8832	428.373	440.788	58.8056	299.195	73.5365	309.019	False	False	True	False	False	False
miR-22-3p__mir-22__+1__-4__17M	hsa-mir-22	MI0000078	hsa-miR-22-3p	MIMAT0000077	1	-4	1713918	1713934	chr17	-	0	AGCTGCCAGTTGAAGAA	AGCTGCCAGTTGAAGAA	not reported	not reported	not reported	not reported	2.70328e-06	5.28193e-06	2.13227	2.20857	4.87685	5.948	1.10243	2.532	1.32579	4.12904	False	False	True	False	False	False
miR-181c-5p__mir-181c__0__+1__23M	hsa-mir-181c	MI0000271	hsa-miR-181c-5p	MIMAT0000258	0	1	13874725	13874747	chr19	+	0	AACATTCAACCTGTCGGTGAGTT	AACATTCAACCTGTCGGTGAGTT	not reported	not reported	not reported	not reported	6.21438e-07	1.27504e-06	1.61428	1.58916	3.28506	5.22301	1.36125	2.58577	1.31939	3.82691	False	False	True	False	False	False
miR-101-3p__mir-101-1__0__-1__20M	hsa-mir-101-1	MI0000103	hsa-miR-101-3p	MIMAT0000099	0	-1	65058443	65058462	chr1	-	0	TACAGTACTGTGATAACTGA	TACAGTACTGTGATAACTGA	not reported	not reported	not reported	not reported	5.73735e-09	1.44098e-08	13867	15441	5802.08	5466.53	5626.43	4798.4	14091.4	4581.05	False	False	False	True	False	False
miR-424-5p__mir-424__0__0__22M	hsa-mir-424	MI0001446	hsa-miR-424-5p	MIMAT0001341	0	0	134546680	134546701	chrX	-	0	CAGCAGCAATTCATGTTTTGAA	CAGCAGCAATTCATGTTTTGAA	not reported	not reported	not reported	not reported	2.38102e-18	2.93606e-17	3.42305	3.61669	21.7143	30.4649	2.80687	14.3563	3.33112	19.2741	False	False	True	False	False	False
miR-183-5p__mir-183__-2__-3__21M	hsa-mir-183	MI0000273	hsa-miR-183-5p	MIMAT0000261	-2	-3	129774970	129774990	chr7	-	0	TGTATGGCACTGGTAGAATTC	TGTATGGCACTGGTAGAATTC	not reported	not reported	not reported	not reported	5.80299e-21	1.21566e-19	0.822531	0.873597	6.05333	5.77432	0.721812	4.50978	0.729049	4.31605	False	False	True	False	False	False
miR-10a-5p__mir-10a__0__0__23M	hsa-mir-10a	MI0000266	hsa-miR-10a-5p	MIMAT0000253	0	0	48579904	48579926	chr17	-	0	TACCCTGTAGATCCGAATTTGTG	TACCCTGTAGATCCGAATTTGTG	not reported	not reported	not reported	not reported	0.0371068	0.0467736	315.28	360.227	329.911	302.701	238.584	225.223	355.879	216.524	False	False	False	True	False	False
miR-106b-3p__mir-106b__-2__-1__23M	hsa-mir-106b	MI0000734	hsa-miR-106b-3p	MIMAT0004672	-2	-1	100094003	100094025	chr7	-	0	TACCGCACTGTGGGTACTTGCTG	TACCGCACTGTGGGTACTTGCTG	not reported	not reported	not reported	not reported	4.69312e-06	8.95166e-06	0.788647	1.31294	1.5291	1.79622	0.662811	1.26722	1.30073	1.55603	True	False	False	False	False	False
miR-126-5p__mir-126__0__-2__19M	hsa-mir-126	MI0000471	hsa-miR-126-5p	MIMAT0000444	0	-2	136670616	136670634	chr9	+	0	CATTATTACTTTTGGTACG	CATTATTACTTTTGGTACG	not reported	not reported	not reported	not reported	2.76561e-06	5.39799e-06	16.6585	17.3138	7.63202	7.97144	10.1895	6.16927	15.3351	6.4554	False	False	False	True	False	False
miR-103a-3p__mir-103a-1__+4__-1__18M	hsa-mir-103a-1	MI0000109	hsa-miR-103a-3p	MIMAT0000101	4	-1	168560905	168560922	chr5	-	0	GCATTGTACAGGGCTATG	GCATTGTACAGGGCTATG	not reported	not reported	not reported	not reported	0.00669688	0.00926854	7.33291	10.408	6.85832	5.71289	5.95094	4.2123	8.87256	2.98376	False	False	False	True	False	False
miR-30c-5p__mir-30c-1__0__0__23M	hsa-mir-30c-1	MI0000736	hsa-miR-30c-5p	MIMAT0000244	0	0	40757300	40757322	chr1	+	0	TGTAAACATCCTACACTCTCAGC	TGTAAACATCCTACACTCTCAGC	not reported	not reported	not reported	not reported	0.016174	0.0213587	213.928	208.636	181.511	200.135	196.084	149.538	207.454	161.952	False	False	False	True	False	False
miR-182-5p__mir-182__0__-7__17M	hsa-mir-182	MI0000272	hsa-miR-182-5p	MIMAT0000259	0	-7	129770454	129770470	chr7	-	0	TTTGGCAATGGTAGAAC	TTTGGCAATGGTAGAAC	not reported	not reported	not reported	not reported	3.20906e-11	1.04245e-10	12.9709	15.3374	39.1709	37.7429	5.93366	24.6745	8.37618	27.6632	False	False	True	False	False	False
miR-660-5p__mir-660__0__0__22M	hsa-mir-660	MI0003684	hsa-miR-660-5p	MIMAT0003338	0	0	50013256	50013277	chrX	+	0	TACCCATTGCATATCGGAGTTG	TACCCATTGCATATCGGAGTTG	not reported	not reported	not reported	not reported	0.00354231	0.00507598	9.10713	16.1251	14.0361	17.2288	6.54415	11.7176	15.7291	13.3534	False	False	False	False	True	False
miR-128-3p__mir-128-1__0__+1__22M	hsa-mir-128-1	MI0000447	hsa-miR-128-3p	MIMAT0000424	0	1	135665446	135665467	chr2	+	0	TCACAGTGAACCGGTCTCTTTT	TCACAGTGAACCGGTCTCTTTT	not reported	not reported	not reported	not reported	4.67455e-09	1.18454e-08	6.4008	8.21292	10.4604	14.8088	5.86291	9.11464	7.94441	12.5717	False	False	True	False	False	False
let-7e-5p__let-7e__0__0__22M	hsa-let-7e	MI0000066	hsa-let-7e-5p	MIMAT0000066	0	0	51692793	51692814	chr19	+	0	TGAGGTAGGAGGTTGTATAGTT	TGAGGTAGGAGGTTGTATAGTT	not reported	not reported	not reported	not reported	5.51738e-10	1.5505e-09	1223.96	1383.48	665.722	671.711	1037.6	526.46	1315.36	577.394	False	False	False	True	False	False
miR-125b-2-3p__mir-125b-2__+2__0__20M	hsa-mir-125b-2	MI0000470	hsa-miR-125b-2-3p	MIMAT0004603	2	0	16590292	16590311	chr21	+	0	ACAAGTCAGGCTCTTGGGAC	ACAAGTCAGGCTCTTGGGAC	not reported	not reported	not reported	not reported	9.6147e-17	8.88456e-16	7.39484	7.02561	2.50484	2.16147	6.4429	1.8506	6.68926	1.61853	False	False	False	True	False	False
miR-328-3p__mir-328__0__0__22M	hsa-mir-328	MI0000804	hsa-miR-328-3p	MIMAT0000752	0	0	67202327	67202348	chr16	-	0	CTGGCCCTCTCTGCCCTTCCGT	CTGGCCCTCTCTGCCCTTCCGT	not reported	not reported	not reported	not reported	0.000763275	0.00117454	159.607	10.2418	23.7917	22.9037	20.5855	18.4441	10.0179	19.0903	False	False	False	False	False	True
miR-335-3p__mir-335__-1__-1__22M	hsa-mir-335	MI0000816	hsa-miR-335-3p	MIMAT0004703	-1	-1	130496161	130496182	chr7	+	0	GTTTTTCATTATTGCTCCTGAC	GTTTTTCATTATTGCTCCTGAC	not reported	not reported	not reported	not reported	3.44437e-06	6.6489e-06	0.720595	0.624486	1.76561	2.10898	0.638064	1.41201	0.559053	1.5538	False	False	True	False	False	False
miR-199b-3p__mir-199b__-1__-1__22M	hsa-mir-199b	MI0000282	hsa-miR-199b-3p	MIMAT0004563	-1	-1	128244746	128244767	chr9	-	0	TACAGTAGTCTGCACATTGGTT	TACAGTAGTCTGCACATTGGTT	not reported	not reported	not reported	not reported	5.45097e-12	1.98203e-11	80.1436	102.24	197.593	226.812	59.7716	163.487	100.629	187.485	False	False	True	False	False	False
miR-34a-5p__mir-34a__0__-5__17M	hsa-mir-34a	MI0000268	hsa-miR-34a-5p	MIMAT0000255	0	-5	9151740	9151756	chr1	-	0	TGGCAGTGTCTTAGCTG	TGGCAGTGTCTTAGCTG	not reported	not reported	not reported	not reported	3.13661e-08	7.35668e-08	0.55226	0.444564	1.4286	1.39829	0.398855	1.15705	0.337503	1.15046	False	False	True	False	False	False
miR-30a-3p__mir-30a__+1__-1__20M	hsa-mir-30a	MI0000088	hsa-miR-30a-3p	MIMAT0000088	1	-1	71403555	71403574	chr6	-	0	TTTCAGTCGGATGTTTGCAG	TTTCAGTCGGATGTTTGCAG	not reported	not reported	not reported	not reported	1.4398e-22	4.96124e-21	1596.02	1485.06	283.229	218.531	1275.09	199.64	1335.8	150.414	False	False	False	True	False	False
miR-330-5p__mir-330__0__+1__23M	hsa-mir-330	MI0000803	hsa-miR-330-5p	MIMAT0004693	0	1	45639048	45639070	chr19	-	0	TCTCTGGGCCTGTGTCTTAGGCT	TCTCTGGGCCTGTGTCTTAGGCT	not reported	not reported	not reported	not reported	4.58485e-10	1.29535e-09	0.594024	0.998697	2.15403	1.94982	0.508627	1.66072	0.954526	1.56473	False	False	True	False	False	False
miR-100-5p__mir-100__+2__0__20M	hsa-mir-100	MI0000102	hsa-miR-100-5p	MIMAT0000098	2	0	122152275	122152294	chr11	-	0	CCCGTAGATCCGAACTTGTG	CCCGTAGATCCGAACTTGTG	not reported	not reported	not reported	not reported	1.67157e-10	4.98228e-10	0.569231	0.44159	4.54391	1.80711	0.446769	1.95135	0.368341	0.914027	False	False	True	False	False	False
let-7a-5p__let-7a-1__+1__-1__20M	hsa-let-7a-1	MI0000060	hsa-let-7a-5p	MIMAT0000062	1	-1	94175963	94175982	chr9	+	0	GAGGTAGTAGGTTGTATAGT	GAGGTAGTAGGTTGTATAGT	not reported	not reported	not reported	not reported	3.28297e-12	1.26218e-11	3.79523	4.71243	1.9389	0.96721	3.264	1.25439	4.0308	0.752388	False	False	False	True	False	False
miR-182-5p__mir-182__0__-8__16M	hsa-mir-182	MI0000272	hsa-miR-182-5p	MIMAT0000259	0	-8	129770455	129770470	chr7	-	0	TTTGGCAATGGTAGAA	TTTGGCAATGGTAGAA	not reported	not reported	not reported	not reported	9.95553e-20	1.58901e-18	9.07448	11.1927	117.93	47.6578	6.48171	39.4393	8.31727	39.2593	False	False	True	False	False	False
miR-26a-5p__mir-26a-1__0__+1__23M	hsa-mir-26a-1	MI0000083	hsa-miR-26a-5p	MIMAT0000082	0	1	37969413	37969435	chr3	+	0	TTCAAGTAATCCAGGATAGGCTG	TTCAAGTAATCCAGGATAGGCTG	not reported	not reported	not reported	not reported	2.97392e-06	5.78925e-06	16.7593	19.6282	12.4169	13.2621	15.6678	10.523	19.3711	11.2829	False	False	False	True	False	False
miR-126-3p__mir-126__-1__-2__21M	hsa-mir-126	MI0000471	hsa-miR-126-3p	MIMAT0000445	-1	-2	136670652	136670672	chr9	+	0	CTCGTACCGTGAGTAATAATG	CTCGTACCGTGAGTAATAATG	not reported	not reported	not reported	not reported	3.71966e-12	1.40516e-11	9.19901	10.8071	3.1771	2.39167	6.57511	2.5742	10.5302	2.06276	False	False	False	True	False	False
miR-183-5p__mir-183__-2__0__24M	hsa-mir-183	MI0000273	hsa-miR-183-5p	MIMAT0000261	-2	0	129774967	129774990	chr7	-	0	TGTATGGCACTGGTAGAATTCACT	TGTATGGCACTGGTAGAATTCACT	not reported	not reported	not reported	not reported	7.59864e-18	8.33815e-17	0.162304	0.127542	1.92132	2.02688	0.105351	1.37051	0.119889	1.38879	False	False	True	False	False	False
let-7e-3p__let-7e__0__-2__20M	hsa-let-7e	MI0000066	hsa-let-7e-3p	MIMAT0004485	0	-2	51692838	51692857	chr19	+	0	CTATACGGCCTCCTAGCTTT	CTATACGGCCTCCTAGCTTT	not reported	not reported	not reported	not reported	0.000111746	0.00018839	2.51602	1.53057	1.48806	1.34358	2.13819	1.22849	1.48875	1.16343	False	False	False	True	False	False
miR-22-3p__mir-22__0__-3__19M	hsa-mir-22	MI0000078	hsa-miR-22-3p	MIMAT0000077	0	-3	1713917	1713935	chr17	-	0	AAGCTGCCAGTTGAAGAAC	AAGCTGCCAGTTGAAGAAC	not reported	not reported	not reported	not reported	5.49653e-06	1.0414e-05	114.259	112.588	213.425	200.915	95.7692	174.498	94.5732	170.448	False	False	True	False	False	False
miR-451a__mir-451a__0__+2__24M	hsa-mir-451a	MI0001729	hsa-miR-451a	MIMAT0001631	0	2	28861401	28861424	chr17	-	0	AAACCGTTACCATTACTGAGTTTA	AAACCGTTACCATTACTGAGTTTA	not reported	not reported	not reported	not reported	6.05004e-06	1.141e-05	7.10291	15.6767	3.6423	3.52817	3.92503	1.67744	11.5245	1.89677	False	False	False	True	False	False
miR-21-5p__mir-21__-1__-2__21M	hsa-mir-21	MI0000077	hsa-miR-21-5p	MIMAT0000076	-1	-2	59841272	59841292	chr17	+	0	GTAGCTTATCAGACTGATGTT	GTAGCTTATCAGACTGATGTT	not reported	not reported	not reported	not reported	5.91465e-18	6.6689e-17	3.41877	4.16372	12.7378	14.4849	2.20142	10.4924	3.66273	11.8438	False	False	True	False	False	False
miR-18a-5p__mir-18a__0__-1__22M	hsa-mir-18a	MI0000072	hsa-miR-18a-5p	MIMAT0000072	0	-1	91350756	91350777	chr13	+	0	TAAGGTGCATCTAGTGCAGATA	TAAGGTGCATCTAGTGCAGATA	not reported	not reported	not reported	not reported	0.000169335	0.000278846	0.965623	1.28721	2.27417	2.72106	0.779433	1.65251	1.15836	2.00727	False	False	True	False	False	False
miR-183-5p__mir-183__+1__-4__17M	hsa-mir-183	MI0000273	hsa-miR-183-5p	MIMAT0000261	1	-4	129774971	129774987	chr7	-	0	ATGGCACTGGTAGAATT	ATGGCACTGGTAGAATT	not reported	not reported	not reported	not reported	1.88444e-18	2.37943e-17	2.52153	2.19754	32.9756	36.7717	1.91345	14.013	1.58262	23.1052	False	False	True	False	False	False
miR-200a-5p__mir-200a__0__-3__19M	hsa-mir-200a	MI0000737	hsa-miR-200a-5p	MIMAT0001620	0	-3	1167878	1167896	chr1	+	0	CATCTTACCGGACAGTGCT	CATCTTACCGGACAGTGCT	not reported	not reported	not reported	not reported	2.37002e-15	1.70005e-14	0.302747	0.175545	1.89449	1.58773	0.256248	1.41999	0.161163	1.241	False	False	True	False	False	False
miR-144-5p__mir-144__+1__0__21M	hsa-mir-144	MI0000460	hsa-miR-144-5p	MIMAT0004600	1	0	28861583	28861603	chr17	-	0	GATATCATCATATACTGTAAG	GATATCATCATATACTGTAAG	not reported	not reported	not reported	not reported	1.80691e-09	4.78254e-09	15.3333	20.7168	3.34232	3.70892	8.46096	2.17524	14.5591	2.25678	False	False	False	True	False	False
miR-20a-3p__mir-20a__+1__+1__22M	hsa-mir-20a	MI0000076	hsa-miR-20a-3p	MIMAT0004493	1	1	91351109	91351130	chr13	+	0	CTGCATTATGAGCACTTAAAGT	CTGCATTATGAGCACTTAAAGT	not reported	not reported	not reported	not reported	1.033e-16	9.38098e-16	0.35829	0.407119	2.63889	2.27328	0.310074	1.92312	0.35442	1.76212	False	False	True	False	False	False
miR-335-5p__mir-335__0__-2__21M	hsa-mir-335	MI0000816	hsa-miR-335-5p	MIMAT0000765	0	-2	130496126	130496146	chr7	+	0	TCAAGAGCAATAACGAAAAAT	TCAAGAGCAATAACGAAAAAT	not reported	not reported	not reported	not reported	8.50832e-09	2.10115e-08	6.98078	5.69755	2.38496	2.1876	4.907	1.84793	5.15166	1.87347	False	False	False	True	False	False
miR-361-5p__mir-361__0__+1__23M	hsa-mir-361	MI0000760	hsa-miR-361-5p	MIMAT0000703	0	1	85903680	85903702	chrX	-	0	TTATCAGAATCTCCAGGGGTACT	TTATCAGAATCTCCAGGGGTACT	not reported	not reported	not reported	not reported	0.0007271	0.00112215	6.42811	8.34567	9.13407	11.5501	5.69353	7.98545	7.65694	9.6517	False	False	True	False	False	False
miR-193a-5p__mir-193a__0__-1__21M	hsa-mir-193a	MI0000487	hsa-miR-193a-5p	MIMAT0004614	0	-1	31560016	31560036	chr17	+	0	TGGGTCTTTGCGGGCGAGATG	TGGGTCTTTGCGGGCGAGATG	not reported	not reported	not reported	not reported	0.00217903	0.00319192	76.1459	41.9287	36.647	28.1404	46.9384	28.8716	40.8817	24.5549	False	False	False	True	False	False
miR-21-5p__mir-21__+4__-2__16M	hsa-mir-21	MI0000077	hsa-miR-21-5p	MIMAT0000076	4	-2	59841277	59841292	chr17	+	0	TTATCAGACTGATGTT	TTATCAGACTGATGTT	not reported	not reported	not reported	not reported	1.53565e-19	2.33965e-18	0.117055	0.196892	3.1586	2.29546	0.0958597	1.64109	0.177809	1.73348	False	False	True	False	False	False
let-7b-5p__let-7b__-1__-6__17M	hsa-let-7b	MI0000063	hsa-let-7b-5p	MIMAT0000063	-1	-6	46113690	46113706	chr22	+	0	GTGAGGTAGTAGGTTGT	GTGAGGTAGTAGGTTGT	not reported	not reported	not reported	not reported	0.000177112	0.000291004	0.782744	1.16677	1.94959	2.81732	0.641608	1.38841	0.994965	1.98601	False	False	True	False	False	False
miR-652-3p__mir-652__0__+1__22M	hsa-mir-652	MI0003667	hsa-miR-652-3p	MIMAT0003322	0	1	110055389	110055410	chrX	+	0	AATGGCGCCACTAGGGTTGTGC	AATGGCGCCACTAGGGTTGTGC	not reported	not reported	not reported	not reported	0.0047165	0.00667553	5.66054	6.03003	4.60749	4.61262	4.99321	3.85303	5.83668	3.58829	False	False	False	True	False	False
miR-183-5p__mir-183__0__0__22M	hsa-mir-183	MI0000273	hsa-miR-183-5p	MIMAT0000261	0	0	129774967	129774988	chr7	-	0	TATGGCACTGGTAGAATTCACT	TATGGCACTGGTAGAATTCACT	not reported	not reported	not reported	not reported	6.43595e-20	1.05935e-18	500.086	564.359	2180.17	2337.56	436.753	1588.27	539.585	1879.48	False	False	True	False	False	False
miR-186-5p__mir-186__0__-3__19M	hsa-mir-186	MI0000483	hsa-miR-186-5p	MIMAT0000456	0	-3	71067684	71067702	chr1	-	0	CAAAGAATTCTCCTTTTGG	CAAAGAATTCTCCTTTTGG	not reported	not reported	not reported	not reported	0.00128199	0.00192691	1.50113	1.84783	2.54332	2.80565	1.3201	2.17357	1.6592	2.43853	False	False	True	False	False	False
miR-21-5p__mir-21__+3__-1__18M	hsa-mir-21	MI0000077	hsa-miR-21-5p	MIMAT0000076	3	-1	59841276	59841293	chr17	+	0	CTTATCAGACTGATGTTG	CTTATCAGACTGATGTTG	not reported	not reported	not reported	not reported	6.46017e-17	6.15469e-16	1.095	0.84261	12.8751	10.9502	0.883868	7.30732	0.801468	6.19575	False	False	True	False	False	False
miR-151a-3p__mir-151a__0__0__21M	hsa-mir-151a	MI0000809	hsa-miR-151a-3p	MIMAT0000757	0	0	140732587	140732607	chr8	-	0	CTAGACTGAAGCTCCTTGAGG	CTAGACTGAAGCTCCTTGAGG	not reported	not reported	not reported	not reported	0.000205254	0.000335152	1940.6	2230.4	1522.04	1330.38	1484.06	1252.61	2204.06	1178.37	False	False	False	True	False	False
miR-449a__mir-449a__0__0__22M	hsa-mir-449a	MI0001648	hsa-miR-449a	MIMAT0001541	0	0	55170586	55170607	chr5	-	0	TGGCAGTGTATTGTTAGCTGGT	TGGCAGTGTATTGTTAGCTGGT	not reported	not reported	not reported	not reported	0.00687862	0.00950224	0.85556	0.362657	3.56233	9.78656	0.498422	0.988418	0.317564	1.83775	False	False	True	False	False	False
miR-30e-5p__mir-30e__+1__+3__24M	hsa-mir-30e	MI0000749	hsa-miR-30e-5p	MIMAT0000692	1	3	40754372	40754395	chr1	+	0	GTAAACATCCTTGACTGGAAGCTG	GTAAACATCCTTGACTGGAAGCTG	not reported	not reported	not reported	not reported	1.04259e-20	2.02317e-19	1.68965	0.979727	18.8309	17.0044	1.20123	12.428	0.928671	12.8201	False	False	True	False	False	False
miR-625-3p__mir-625__+1__-1__20M	hsa-mir-625	MI0003639	hsa-miR-625-3p	MIMAT0004808	1	-1	65471154	65471173	chr14	+	0	ACTATAGAACTTTCCCCCTC	ACTATAGAACTTTCCCCCTC	not reported	not reported	not reported	not reported	2.67488e-10	7.79627e-10	0.515525	0.304887	1.90489	1.1668	0.37336	1.35233	0.27536	0.910552	False	False	True	False	False	False
miR-24-3p__mir-24-1__0__0__22M	hsa-mir-24-1	MI0000080	hsa-miR-24-3p	MIMAT0000080	0	0	95086064	95086085	chr9	+	0	TGGCTCAGTTCAGCAGGAACAG	TGGCTCAGTTCAGCAGGAACAG	not reported	not reported	not reported	not reported	4.29731e-06	8.21794e-06	1411.65	1710.65	1078.56	1138.9	1181.08	1019.03	1633.38	1062.15	False	False	False	True	False	False
miR-30d-5p__mir-30d__0__-6__16M	hsa-mir-30d	MI0000255	hsa-miR-30d-5p	MIMAT0000245	0	-6	134804925	134804940	chr8	-	0	TGTAAACATCCCCGAC	TGTAAACATCCCCGAC	not reported	not reported	not reported	not reported	0.024534	0.031518	50.5943	55.3256	66.4324	47.7978	45.4461	36.7423	50.4203	33.2542	False	False	False	True	False	False
miR-126-3p__mir-126__0__-6__16M	hsa-mir-126	MI0000471	hsa-miR-126-3p	MIMAT0000445	0	-6	136670653	136670668	chr9	+	0	TCGTACCGTGAGTAAT	TCGTACCGTGAGTAAT	not reported	not reported	not reported	not reported	0.0196876	0.0256223	2.62924	3.30326	14.0896	4.7082	1.71211	3.02626	2.41481	3.30237	False	False	True	False	False	False
miR-505-3p__mir-505__+1__-1__20M	hsa-mir-505	MI0003190	hsa-miR-505-3p	MIMAT0002876	1	-1	139924161	139924180	chrX	-	0	GTCAACACTTGCTGGTTTCC	GTCAACACTTGCTGGTTTCC	not reported	not reported	not reported	not reported	3.51963e-06	6.78707e-06	0.529531	0.593718	1.35615	1.2767	0.433047	1.10231	0.576417	1.04118	False	False	True	False	False	False
miR-140-3p__mir-140__+3__+2__20M	hsa-mir-140	MI0000456	hsa-miR-140-3p	MIMAT0004597	3	2	69933145	69933164	chr16	+	0	CACAGGGTAGAACCACGGAC	CACAGGGTAGAACCACGGAC	not reported	not reported	not reported	not reported	0.000379371	0.000602127	1.71673	1.20161	1.57134	1.03174	1.56773	1.26579	1.06381	0.815364	False	True	False	False	False	False
miR-30a-5p__mir-30a__0__-1__21M	hsa-mir-30a	MI0000088	hsa-miR-30a-5p	MIMAT0000087	0	-1	71403596	71403616	chr6	-	0	TGTAAACATCCTCGACTGGAA	TGTAAACATCCTCGACTGGAA	not reported	not reported	not reported	not reported	2.3277e-14	1.42326e-13	3839.03	4682.64	957.439	768.786	2591.67	700.027	4491.38	574.657	False	False	False	True	False	False
miR-425-5p__mir-425__0__+1__24M	hsa-mir-425	MI0001448	hsa-miR-425-5p	MIMAT0003393	0	1	49020198	49020221	chr3	-	0	AATGACACGATCACTCCCGTTGAG	AATGACACGATCACTCCCGTTGAG	not reported	not reported	not reported	not reported	3.73565e-12	1.40678e-11	4.76543	5.09879	13.2618	16.7419	4.26995	10.103	4.5672	12.9881	False	False	True	False	False	False
miR-375-3p__mir-375__0__0__22M	hsa-mir-375	MI0000783	hsa-miR-375-3p	MIMAT0000728	0	0	219001648	219001669	chr2	-	0	TTTGTTCGTTCGGCTCGCGTGA	TTTGTTCGTTCGGCTCGCGTGA	not reported	not reported	not reported	not reported	6.73523e-05	0.000115987	9264.08	4929.97	22549.6	22248.2	5151.35	8879.7	4767.48	9755.55	False	False	True	False	False	False
miR-423-3p__mir-423__0__-3__20M	hsa-mir-423	MI0001445	hsa-miR-423-3p	MIMAT0001340	0	-3	30117131	30117150	chr17	+	0	AGCTCGGTCTGAGGCCCCTC	AGCTCGGTCTGAGGCCCCTC	not reported	not reported	not reported	not reported	2.16683e-07	4.65837e-07	11.9235	2.17163	7.13318	5.45602	3.8675	5.33154	2.06616	4.24635	False	False	True	False	False	False
miR-21-3p__mir-21__0__0__21M	hsa-mir-21	MI0000077	hsa-miR-21-3p	MIMAT0004494	0	0	59841311	59841331	chr17	+	0	CAACACCAGTCGATGGGCTGT	CAACACCAGTCGATGGGCTGT	not reported	not reported	not reported	not reported	3.99055e-26	4.14742e-23	120.586	106.085	981.868	810.508	102.223	796.451	102.284	627.075	False	False	True	False	False	False
miR-21-5p__mir-21__0__-4__18M	hsa-mir-21	MI0000077	hsa-miR-21-5p	MIMAT0000076	0	-4	59841273	59841290	chr17	+	0	TAGCTTATCAGACTGATG	TAGCTTATCAGACTGATG	not reported	not reported	not reported	not reported	2.25295e-14	1.38444e-13	526.379	502.188	1763.79	1763.5	251.227	1319.75	462.748	1241.89	False	False	True	False	False	False
miR-223-3p__mir-223__0__-4__18M	hsa-mir-223	MI0000300	hsa-miR-223-3p	MIMAT0000280	0	-4	66018937	66018954	chrX	+	0	TGTCAGTTTGTCAAATAC	TGTCAGTTTGTCAAATAC	not reported	not reported	not reported	not reported	0.000949336	0.00144338	3.83601	6.08547	2.43684	2.59448	2.7658	1.61034	4.54222	1.51811	False	False	False	True	False	False
miR-182-5p__mir-182__0__-5__19M	hsa-mir-182	MI0000272	hsa-miR-182-5p	MIMAT0000259	0	-5	129770452	129770470	chr7	-	0	TTTGGCAATGGTAGAACTC	TTTGGCAATGGTAGAACTC	not reported	not reported	not reported	not reported	2.743e-19	3.95056e-18	180.771	205.034	1231.01	1378.19	109.512	806.212	177.649	907.392	False	False	True	False	False	False
miR-224-5p__mir-224__+1__-1__23M	hsa-mir-224	MI0000301	hsa-miR-224-5p	MIMAT0000281	1	-1	151958629	151958651	chrX	-	0	CAAGTCACTAGTGGTTCCGTTTA	CAAGTCACTAGTGGTTCCGTTTA	not reported	not reported	not reported	not reported	7.94602e-08	1.78968e-07	0.793253	0.886714	3.84557	3.17753	0.666441	2.32753	0.848053	2.01203	False	False	True	False	False	False
miR-455-5p__mir-455__0__-1__21M	hsa-mir-455	MI0003513	hsa-miR-455-5p	MIMAT0003150	0	-1	114209449	114209469	chr9	+	0	TATGTGCCTTTGGACTACATC	TATGTGCCTTTGGACTACATC	not reported	not reported	not reported	not reported	0.038846	0.04889	1.07812	1.35469	1.72599	1.55624	0.934328	1.45905	1.25834	1.30792	False	False	True	False	False	False
miR-200c-3p__mir-200c__+1__0__22M	hsa-mir-200c	MI0000650	hsa-miR-200c-3p	MIMAT0000617	1	0	6963743	6963764	chr12	+	0	AATACTGCCGGGTAATGATGGA	AATACTGCCGGGTAATGATGGA	not reported	not reported	not reported	not reported	6.44311e-11	2.01833e-10	0.556822	0.517663	2.29906	1.75993	0.463801	1.50367	0.489171	1.39655	False	False	True	False	False	False
miR-651-5p__mir-651__0__0__22M	hsa-mir-651	MI0003666	hsa-miR-651-5p	MIMAT0003321	0	0	8126980	8127001	chrX	+	0	TTTAGGATAAGCTTGACTTTTG	TTTAGGATAAGCTTGACTTTTG	not reported	not reported	not reported	not reported	2.36945e-09	6.16961e-09	0.977581	1.17084	2.56701	3.27395	0.741792	2.01272	1.01965	2.58068	False	False	True	False	False	False
miR-2355-5p__mir-2355__0__-4__17M	hsa-mir-2355	MI0015873	hsa-miR-2355-5p	MIMAT0016895	0	-4	207110047	207110063	chr2	-	0	ATCCCCAGATACAATGG	ATCCCCAGATACAATGG	not reported	not reported	not reported	not reported	4.57735e-13	2.0733e-12	0.938435	0.835486	5.0308	6.37429	0.751017	3.29665	0.740368	4.33201	False	False	True	False	False	False
miR-151a-3p__mir-151a__-1__0__22M	hsa-mir-151a	MI0000809	hsa-miR-151a-3p	MIMAT0000757	-1	0	140732587	140732608	chr8	-	0	ACTAGACTGAAGCTCCTTGAGG	ACTAGACTGAAGCTCCTTGAGG	not reported	not reported	not reported	not reported	0.0132586	0.0176798	10.5105	10.8703	15.026	15.2611	8.9661	12.9054	10.7791	13.6293	False	False	True	False	False	False
miR-378a-5p__mir-378a__+1__0__21M	hsa-mir-378a	MI0000786	hsa-miR-378a-5p	MIMAT0000731	1	0	149732830	149732850	chr5	+	0	TCCTGACTCCAGGTCCTGTGT	TCCTGACTCCAGGTCCTGTGT	not reported	not reported	not reported	not reported	3.30872e-10	9.54557e-10	3.67296	3.49107	1.09898	1.03807	2.3738	0.925474	3.31409	0.868614	False	False	False	True	False	False
miR-223-3p__mir-223__0__-1__21M	hsa-mir-223	MI0000300	hsa-miR-223-3p	MIMAT0000280	0	-1	66018937	66018957	chrX	+	0	TGTCAGTTTGTCAAATACCCC	TGTCAGTTTGTCAAATACCCC	not reported	not reported	not reported	not reported	0.000832931	0.00127534	42.9174	68.4514	30.5059	36.4074	30.9388	23.1112	59.2699	23.5182	False	False	False	True	False	False
miR-23a-3p__mir-23a__0__-5__16M	hsa-mir-23a	MI0000079	hsa-miR-23a-3p	MIMAT0000078	0	-5	13836600	13836615	chr19	-	0	ATCACATTGCCAGGGA	ATCACATTGCCAGGGA	not reported	not reported	not reported	not reported	0.000450867	0.000711317	9.59432	10.6793	29.7931	17.5898	8.11132	14.7681	10.0002	13.3468	False	False	True	False	False	False
miR-15a-5p__mir-15a__0__+1__23M	hsa-mir-15a	MI0000069	hsa-miR-15a-5p	MIMAT0000068	0	1	50049166	50049188	chr13	-	0	TAGCAGCACATAATGGTTTGTGG	TAGCAGCACATAATGGTTTGTGG	not reported	not reported	not reported	not reported	0.0189157	0.0246875	30.5529	49.4949	36.566	42.8172	21.9539	32.1755	48.2056	37.819	False	False	False	False	True	False
miR-425-5p__mir-425__0__-1__22M	hsa-mir-425	MI0001448	hsa-miR-425-5p	MIMAT0003393	0	-1	49020200	49020221	chr3	-	0	AATGACACGATCACTCCCGTTG	AATGACACGATCACTCCCGTTG	not reported	not reported	not reported	not reported	1.76565e-07	3.82713e-07	8.5806	11.3595	15.8124	20.7159	7.83739	12.9514	9.87782	16.2359	False	False	True	False	False	False
miR-210-3p__mir-210__0__-4__18M	hsa-mir-210	MI0000286	hsa-miR-210-3p	MIMAT0000267	0	-4	568116	568133	chr11	-	0	CTGTGCGTGTGACAGCGG	CTGTGCGTGTGACAGCGG	not reported	not reported	not reported	not reported	8.71216e-21	1.72697e-19	0.33205	0.205751	8.6815	7.73445	0.242007	4.44878	0.18437	4.63768	False	False	True	False	False	False
miR-598-3p__mir-598__0__0__22M	hsa-mir-598	MI0003610	hsa-miR-598-3p	MIMAT0003266	0	0	11035221	11035242	chr8	-	0	TACGTCATCGTTGTCATCGTCA	TACGTCATCGTTGTCATCGTCA	not reported	not reported	not reported	not reported	6.19421e-11	1.94532e-10	24.7367	34.8159	11.1884	12.4408	18.9925	8.64103	33.9105	9.8431	False	False	False	True	False	False
miR-361-5p__mir-361__0__-3__19M	hsa-mir-361	MI0000760	hsa-miR-361-5p	MIMAT0000703	0	-3	85903684	85903702	chrX	-	0	TTATCAGAATCTCCAGGGG	TTATCAGAATCTCCAGGGG	not reported	not reported	not reported	not reported	0.000134821	0.000225215	32.8682	40.5211	49.382	46.7316	31.1172	41.1692	38.4833	42.4047	False	False	True	False	False	False
miR-409-5p__mir-409__0__-2__21M	hsa-mir-409	MI0001735	hsa-miR-409-5p	MIMAT0001638	0	-2	101065314	101065334	chr14	+	0	AGGTTACCCGAGCAACTTTGC	AGGTTACCCGAGCAACTTTGC	not reported	not reported	not reported	not reported	2.33832e-14	1.42738e-13	0.43117	0.345641	4.28811	2.96702	0.291411	2.15188	0.329286	2.02014	False	False	True	False	False	False
miR-423-5p__mir-423__0__-4__19M	hsa-mir-423	MI0001445	hsa-miR-423-5p	MIMAT0004748	0	-4	30117095	30117113	chr17	+	0	TGAGGGGCAGAGAGCGAGA	TGAGGGGCAGAGAGCGAGA	not reported	not reported	not reported	not reported	3.9066e-12	1.46676e-11	18.2077	10.9199	7.05602	6.58185	14.4416	4.45416	9.90167	4.04732	False	False	False	True	False	False
miR-378c__mir-378c__0__-4__21M	hsa-mir-378c	MI0015825	hsa-miR-378c	MIMAT0016847	0	-4	130962638	130962658	chr10	-	0	ACTGGACTTGGAGTCAGAAGA	ACTGGACTTGGAGTCAGAAGA	not reported	not reported	not reported	not reported	6.88997e-21	1.4035e-19	18.3194	28.9837	6.43924	6.09003	16.9131	5.19354	26.7226	5.33947	False	False	False	True	False	False
miR-378d__mir-378d-1__0__-2__18M	hsa-mir-378d-1	MI0016749	hsa-miR-378d	MIMAT0018926	0	-2	5923281	5923298	chr4	-	0	ACTGGACTTGGAGTCAGA	ACTGGACTTGGAGTCAGA	not reported	not reported	not reported	not reported	0.00718425	0.00989848	15.8612	29.9636	14.3858	22.2301	12.7849	7.96855	21.4097	10.7858	False	False	False	True	False	False
miR-192-5p__mir-192__0__-1__20M	hsa-mir-192	MI0000234	hsa-miR-192-5p	MIMAT0000222	0	-1	64891204	64891223	chr11	-	0	CTGACCTATGAATTGACAGC	CTGACCTATGAATTGACAGC	not reported	not reported	not reported	not reported	0.00417623	0.00594279	53.91	64.2511	208.885	55.4083	31.54	44.9419	49.2093	27.1637	False	False	False	False	True	False
miR-708-5p__mir-708__0__-1__22M	hsa-mir-708	MI0005543	hsa-miR-708-5p	MIMAT0004926	0	-1	79402078	79402099	chr11	-	0	AAGGAGCTTACAATCTAGCTGG	AAGGAGCTTACAATCTAGCTGG	not reported	not reported	not reported	not reported	5.53801e-23	2.14933e-21	2.3071	2.52643	16.9554	21.0463	1.86694	11.9835	2.49706	16.8494	False	False	True	False	False	False
miR-126-3p__mir-126__0__-1__21M	hsa-mir-126	MI0000471	hsa-miR-126-3p	MIMAT0000445	0	-1	136670653	136670673	chr9	+	0	TCGTACCGTGAGTAATAATGC	TCGTACCGTGAGTAATAATGC	not reported	not reported	not reported	not reported	1.20126e-07	2.64421e-07	219.379	307.471	122.358	128.039	160.81	97.1254	288.37	104.361	False	False	False	True	False	False
miR-92b-3p__mir-92b__0__-2__20M	hsa-mir-92b	MI0003560	hsa-miR-92b-3p	MIMAT0003218	0	-2	155195237	155195256	chr1	+	0	TATTGCACTCGTCCCGGCCT	TATTGCACTCGTCCCGGCCT	not reported	not reported	not reported	not reported	0.00908939	0.0123299	40.7337	18.3264	51.0466	51.5854	27.4162	37.2774	15.8071	37.1468	False	False	True	False	False	False
miR-196a-5p__mir-196a-1__0__-1__21M	hsa-mir-196a-1	MI0000238	hsa-miR-196a-5p	MIMAT0000226	0	-1	48632533	48632553	chr17	-	0	TAGGTAGTTTCATGTTGTTGG	TAGGTAGTTTCATGTTGTTGG	not reported	not reported	not reported	not reported	1.46393e-10	4.40974e-10	0.839193	0.943343	72.6297	60.6607	0.660955	9.8571	0.72489	5.22283	False	False	True	False	False	False
miR-24-1-5p__mir-24-1__-1__0__23M	hsa-mir-24-1	MI0000080	hsa-miR-24-1-5p	MIMAT0000079	-1	0	95086026	95086048	chr9	+	0	GTGCCTACTGAGCTGATATCAGT	GTGCCTACTGAGCTGATATCAGT	not reported	not reported	not reported	not reported	3.6784e-12	1.391e-11	0.816829	0.771395	3.17651	3.84228	0.655056	2.38884	0.679931	2.80955	False	False	True	False	False	False
miR-183-5p__mir-183__-2__-1__23M	hsa-mir-183	MI0000273	hsa-miR-183-5p	MIMAT0000261	-2	-1	129774968	129774990	chr7	-	0	TGTATGGCACTGGTAGAATTCAC	TGTATGGCACTGGTAGAATTCAC	not reported	not reported	not reported	not reported	1.20754e-18	1.59577e-17	0.250184	0.258132	4.206	3.82044	0.209522	2.45028	0.226784	2.52928	False	False	True	False	False	False
miR-511-5p__mir-511__0__0__21M	hsa-mir-511	MI0003127	hsa-miR-511-5p	MIMAT0002808	0	0	17845122	17845142	chr10	+	0	GTGTCTTTTGCTCTGCAGTCA	GTGTCTTTTGCTCTGCAGTCA	not reported	not reported	not reported	not reported	0.00512896	0.00721774	15.0931	16.5829	12.7706	9.54602	12.537	9.58038	14.1183	7.01074	False	False	False	True	False	False
miR-100-5p__mir-100__0__-3__19M	hsa-mir-100	MI0000102	hsa-miR-100-5p	MIMAT0000098	0	-3	122152278	122152296	chr11	-	0	AACCCGTAGATCCGAACTT	AACCCGTAGATCCGAACTT	not reported	not reported	not reported	not reported	0.00062353	0.000969615	121.242	129.709	110.004	85.2727	86.0891	69.9985	129.172	66.9058	False	False	False	True	False	False
miR-652-3p__mir-652__0__-1__20M	hsa-mir-652	MI0003667	hsa-miR-652-3p	MIMAT0003322	0	-1	110055389	110055408	chrX	+	0	AATGGCGCCACTAGGGTTGT	AATGGCGCCACTAGGGTTGT	not reported	not reported	not reported	not reported	7.08885e-05	0.000121775	7.14687	6.69125	3.71646	3.20114	5.28482	2.98027	6.02762	2.79693	False	False	False	True	False	False
miR-22-5p__mir-22__0__-1__21M	hsa-mir-22	MI0000078	hsa-miR-22-5p	MIMAT0004495	0	-1	1713953	1713973	chr17	-	0	AGTTCTTCAGTGGCAAGCTTT	AGTTCTTCAGTGGCAAGCTTT	not reported	not reported	not reported	not reported	3.57175e-09	9.17065e-09	7.15161	7.33563	14.2141	17.4004	5.85816	12.0564	7.1448	14.2282	False	False	True	False	False	False
let-7a-5p__let-7a-1__0__-1__21M	hsa-let-7a-1	MI0000060	hsa-let-7a-5p	MIMAT0000062	0	-1	94175962	94175982	chr9	+	0	TGAGGTAGTAGGTTGTATAGT	TGAGGTAGTAGGTTGTATAGT	not reported	not reported	not reported	not reported	1.22292e-21	3.17528e-20	31565.3	35363.1	8532.69	7494.2	28065	6529.48	34773.7	6200.98	False	False	False	True	False	False
miR-24-1-5p__mir-24-1__-1__-2__21M	hsa-mir-24-1	MI0000080	hsa-miR-24-1-5p	MIMAT0000079	-1	-2	95086026	95086046	chr9	+	0	GTGCCTACTGAGCTGATATCA	GTGCCTACTGAGCTGATATCA	not reported	not reported	not reported	not reported	0.000112013	0.000188733	3.02828	4.24169	2.13976	2.03926	2.43214	1.78266	4.09145	1.70422	False	False	False	True	False	False
miR-182-5p__mir-182__0__-2__22M	hsa-mir-182	MI0000272	hsa-miR-182-5p	MIMAT0000259	0	-2	129770449	129770470	chr7	-	0	TTTGGCAATGGTAGAACTCACA	TTTGGCAATGGTAGAACTCACA	not reported	not reported	not reported	not reported	1.84142e-19	2.74871e-18	2131.73	2472.08	8669.59	9055.32	1393.87	6767.8	2340.19	7536.32	False	False	True	False	False	False
miR-146b-3p__mir-146b__0__-1__21M	hsa-mir-146b	MI0003129	hsa-miR-146b-3p	MIMAT0004766	0	-1	102436557	102436577	chr10	+	0	GCCCTGTGGACTCAGTTCTGG	GCCCTGTGGACTCAGTTCTGG	not reported	not reported	not reported	not reported	1.99787e-11	6.68435e-11	61.0458	35.1283	22.5291	19.6949	43.4439	17.8058	33.4258	14.9777	False	False	False	True	False	False
miR-148a-3p__mir-148a__0__-4__18M	hsa-mir-148a	MI0000253	hsa-miR-148a-3p	MIMAT0000243	0	-4	25949926	25949943	chr7	-	0	TCAGTGCACTACAGAACT	TCAGTGCACTACAGAACT	not reported	not reported	not reported	not reported	1.23727e-12	5.11988e-12	8.00223	8.09839	79.9905	232.379	6.9019	23.1148	7.67701	25.4781	False	False	True	False	False	False
let-7d-5p__let-7d__0__+1__23M	hsa-let-7d	MI0000065	hsa-let-7d-5p	MIMAT0000065	0	1	94178841	94178863	chr9	+	0	AGAGGTAGTAGGTTGCATAGTTT	AGAGGTAGTAGGTTGCATAGTTT	not reported	not reported	not reported	not reported	0.000518361	0.000812239	3.09581	2.57865	4.97334	6.64628	2.68282	3.94483	2.27399	4.99329	False	False	True	False	False	False
miR-34b-3p__mir-34b__+1__+1__22M	hsa-mir-34b	MI0000742	hsa-miR-34b-3p	MIMAT0004676	1	1	111512988	111513009	chr11	+	0	AATCACTAACTCCACTGCCATC	AATCACTAACTCCACTGCCATC	not reported	not reported	not reported	not reported	0.00187558	0.00276721	5.05725	2.0818	2.24631	2.4091	2.50251	0.987067	1.5945	1.19989	False	False	False	True	False	False
miR-21-5p__mir-21__0__-6__16M	hsa-mir-21	MI0000077	hsa-miR-21-5p	MIMAT0000076	0	-6	59841273	59841288	chr17	+	0	TAGCTTATCAGACTGA	TAGCTTATCAGACTGA	not reported	not reported	not reported	not reported	3.41455e-20	5.96967e-19	218.879	248.393	1888.55	1197.16	107.226	906.006	226.199	947.463	False	False	True	False	False	False
miR-181a-5p__mir-181a-1__+1__-6__16M	hsa-mir-181a-1	MI0000289	hsa-miR-181a-5p	MIMAT0000256	1	-6	198859114	198859129	chr1	-	0	ACATTCAACGCTGTCG	ACATTCAACGCTGTCG	not reported	not reported	not reported	not reported	5.77795e-07	1.18814e-06	2.65941	2.28824	1.26924	0.85035	1.99704	0.995436	1.99238	0.707104	False	False	False	True	False	False
miR-103a-3p__mir-103a-1__+2__-4__17M	hsa-mir-103a-1	MI0000109	hsa-miR-103a-3p	MIMAT0000101	2	-4	168560908	168560924	chr5	-	0	CAGCATTGTACAGGGCT	CAGCATTGTACAGGGCT	not reported	not reported	not reported	not reported	3.62369e-07	7.59554e-07	4.67014	5.6388	18.9922	25.5118	3.01535	9.65305	4.0623	14.0509	False	False	True	False	False	False
miR-425-5p__mir-425__+1__0__22M	hsa-mir-425	MI0001448	hsa-miR-425-5p	MIMAT0003393	1	0	49020199	49020220	chr3	-	0	ATGACACGATCACTCCCGTTGA	ATGACACGATCACTCCCGTTGA	not reported	not reported	not reported	not reported	4.04399e-13	1.85912e-12	6.24147	8.35514	18.3419	19.7427	5.53424	13.7892	7.83451	15.1376	False	False	True	False	False	False
miR-99b-5p__mir-99b__0__-2__20M	hsa-mir-99b	MI0000746	hsa-miR-99b-5p	MIMAT0000689	0	-2	51692618	51692637	chr19	+	0	CACCCGTAGAACCGACCTTG	CACCCGTAGAACCGACCTTG	not reported	not reported	not reported	not reported	0.00175774	0.00260377	1558.81	931.585	1071.05	1030.92	1293.21	844.768	907.156	834.075	False	False	False	True	False	False
miR-126-3p__mir-126__-1__-6__17M	hsa-mir-126	MI0000471	hsa-miR-126-3p	MIMAT0000445	-1	-6	136670652	136670668	chr9	+	0	CTCGTACCGTGAGTAAT	CTCGTACCGTGAGTAAT	not reported	not reported	not reported	not reported	6.33243e-05	0.000109357	1.0296	1.55409	2.68162	3.90737	0.772826	1.80215	1.19999	2.63258	False	False	True	False	False	False
miR-101-3p__mir-101-1__-1__-1__21M	hsa-mir-101-1	MI0000103	hsa-miR-101-3p	MIMAT0000099	-1	-1	65058443	65058463	chr1	-	0	GTACAGTACTGTGATAACTGA	GTACAGTACTGTGATAACTGA	not reported	not reported	not reported	not reported	1.01634e-07	2.26284e-07	3992.97	5234.76	2603.63	2517.37	1883.9	2317.78	5003.13	2262.96	False	False	False	False	True	False
miR-598-3p__mir-598__0__-1__21M	hsa-mir-598	MI0003610	hsa-miR-598-3p	MIMAT0003266	0	-1	11035222	11035242	chr8	-	0	TACGTCATCGTTGTCATCGTC	TACGTCATCGTTGTCATCGTC	not reported	not reported	not reported	not reported	7.07675e-11	2.20186e-10	5.51802	7.00457	2.08885	2.31792	4.14465	1.67773	6.66544	1.94874	False	False	False	True	False	False
miR-183-5p__mir-183__-1__-2__21M	hsa-mir-183	MI0000273	hsa-miR-183-5p	MIMAT0000261	-1	-2	129774969	129774989	chr7	-	0	GTATGGCACTGGTAGAATTCA	GTATGGCACTGGTAGAATTCA	not reported	not reported	not reported	not reported	7.80972e-15	5.1603e-14	0.857171	1.16617	3.63744	3.75949	0.741843	2.84233	1.08194	3.07032	False	False	True	False	False	False
miR-183-5p__mir-183__-1__-1__22M	hsa-mir-183	MI0000273	hsa-miR-183-5p	MIMAT0000261	-1	-1	129774968	129774989	chr7	-	0	GTATGGCACTGGTAGAATTCAC	GTATGGCACTGGTAGAATTCAC	not reported	not reported	not reported	not reported	5.67129e-13	2.51928e-12	0.304234	0.287365	1.81748	1.79036	0.232987	1.28444	0.264227	1.3072	False	False	True	False	False	False
miR-30c-2-3p__mir-30c-2__0__0__22M	hsa-mir-30c-2	MI0000254	hsa-miR-30c-2-3p	MIMAT0004550	0	0	71376964	71376985	chr6	-	0	CTGGGAGAAGGCTGTTTACTCT	CTGGGAGAAGGCTGTTTACTCT	not reported	not reported	not reported	not reported	1.45645e-25	9.60095e-23	151.39	157.853	23.0696	20.087	136.481	16.7554	151.551	15.7249	False	False	False	True	False	False
miR-142-3p__mir-142__+1__-4__18M	hsa-mir-142	MI0000458	hsa-miR-142-3p	MIMAT0000434	1	-4	58331249	58331266	chr17	-	0	GTAGTGTTTCCTACTTTA	GTAGTGTTTCCTACTTTA	not reported	not reported	not reported	not reported	1.40686e-09	3.79175e-09	0.233659	0.160326	3.53356	5.73325	0.201613	1.25588	0.13888	1.30418	False	False	True	False	False	False
miR-361-3p__mir-361__-2__-3__22M	hsa-mir-361	MI0000760	hsa-miR-361-3p	MIMAT0004682	-2	-3	85903644	85903665	chrX	-	0	AGTCCCCCAGGTGTGATTCTGA	AGTCCCCCAGGTGTGATTCTGA	not reported	not reported	not reported	not reported	5.83384e-05	0.000100888	1.64372	0.6091	2.41866	2.65872	1.28349	1.96871	0.592002	2.12716	False	False	True	False	False	False
miR-20a-5p__mir-20a__0__0__23M	hsa-mir-20a	MI0000076	hsa-miR-20a-5p	MIMAT0000075	0	0	91351072	91351094	chr13	+	0	TAAAGTGCTTATAGTGCAGGTAG	TAAAGTGCTTATAGTGCAGGTAG	not reported	not reported	not reported	not reported	2.33879e-08	5.5669e-08	76.535	110.17	184.61	179.25	52.6977	144.592	106.47	153.423	False	False	True	False	False	False
miR-221-3p__mir-221__0__-5__18M	hsa-mir-221	MI0000298	hsa-miR-221-3p	MIMAT0000278	0	-5	45746185	45746202	chrX	-	0	AGCTACATTGTCTGCTGG	AGCTACATTGTCTGCTGG	not reported	not reported	not reported	not reported	0.00480051	0.00678402	5.54016	5.95807	5.41725	3.74462	4.75018	3.76114	5.40659	2.73131	False	False	False	True	False	False
miR-200a-5p__mir-200a__+2__0__20M	hsa-mir-200a	MI0000737	hsa-miR-200a-5p	MIMAT0001620	2	0	1167880	1167899	chr1	+	0	TCTTACCGGACAGTGCTGGA	TCTTACCGGACAGTGCTGGA	not reported	not reported	not reported	not reported	5.31212e-08	1.22258e-07	0.49285	0.468735	1.54501	1.20776	0.338884	1.12241	0.458675	0.867024	False	False	True	False	False	False
miR-143-3p__mir-143__-1__-2__20M	hsa-mir-143	MI0000459	hsa-miR-143-3p	MIMAT0000435	-1	-2	149428977	149428996	chr5	+	0	CTGAGATGAAGCACTGTAGC	CTGAGATGAAGCACTGTAGC	not reported	not reported	not reported	not reported	4.32922e-13	1.96575e-12	163.995	155.572	32.9561	30.5838	98.9798	26.2424	136.857	24.2126	False	False	False	True	False	False
miR-455-3p__mir-455__-2__-1__22M	hsa-mir-455	MI0003513	hsa-miR-455-3p	MIMAT0004784	-2	-1	114209485	114209506	chr9	+	0	ATGCAGTCCATGGGCATATACA	ATGCAGTCCATGGGCATATACA	not reported	not reported	not reported	not reported	0.0233911	0.0301339	1.80836	1.87475	1.30459	1.06608	1.40347	1.03222	1.597	0.821277	False	False	False	True	False	False
miR-197-3p__mir-197__0__+1__23M	hsa-mir-197	MI0000239	hsa-miR-197-3p	MIMAT0000227	0	1	109598940	109598962	chr1	+	0	TTCACCACCTTCTCCACCCAGCA	TTCACCACCTTCTCCACCCAGCA	not reported	not reported	not reported	not reported	0.0352411	0.044559	31.9392	3.06238	4.94374	5.65404	5.55993	3.98914	2.93448	4.76901	False	False	False	False	False	True
miR-93-5p__mir-93__0__-7__16M	hsa-mir-93	MI0000095	hsa-miR-93-5p	MIMAT0000093	0	-7	100093822	100093837	chr7	-	0	CAAAGTGCTGTTCGTG	CAAAGTGCTGTTCGTG	not reported	not reported	not reported	not reported	2.1265e-16	1.83616e-15	4.18697	5.80738	26.7324	17.9	3.00413	14.0044	4.82239	14.8291	False	False	True	False	False	False
miR-532-3p__mir-532__0__-1__21M	hsa-mir-532	MI0003205	hsa-miR-532-3p	MIMAT0004780	0	-1	50003204	50003224	chrX	+	0	CCTCCCACACCCAAGGCTTGC	CCTCCCACACCCAAGGCTTGC	not reported	not reported	not reported	not reported	0.000260488	0.000420498	67.4418	5.07234	13.3434	16.5292	11.2134	10.6417	4.987	11.2234	False	False	False	False	False	True
miR-15b-3p__mir-15b__0__-3__19M	hsa-mir-15b	MI0000438	hsa-miR-15b-3p	MIMAT0004586	0	-3	160404645	160404663	chr3	+	0	CGAATCATTATTTGCTGCT	CGAATCATTATTTGCTGCT	not reported	not reported	not reported	not reported	6.64946e-05	0.000114563	13.0675	21.6497	4.7854	6.48169	7.02083	3.5352	14.6137	3.81968	False	False	False	True	False	False
miR-1180-3p__mir-1180__0__-3__19M	hsa-mir-1180	MI0006273	hsa-miR-1180-3p	MIMAT0005825	0	-3	19344516	19344534	chr17	-	0	TTTCCGGCTCGCGTGGGTG	TTTCCGGCTCGCGTGGGTG	not reported	not reported	not reported	not reported	0.00848124	0.0115559	4.59748	0.784296	3.24334	3.12124	1.99729	2.26832	0.703586	2.3197	False	False	True	False	False	False
miR-451a__mir-451a__0__-6__16M	hsa-mir-451a	MI0001729	hsa-miR-451a	MIMAT0001631	0	-6	28861409	28861424	chr17	-	0	AAACCGTTACCATTAC	AAACCGTTACCATTAC	not reported	not reported	not reported	not reported	1.1557e-07	2.55261e-07	10.9835	17.8901	5.79792	2.74483	5.92177	1.61241	9.25918	1.60246	False	False	False	True	False	False
miR-140-3p__mir-140__+4__+6__23M	hsa-mir-140	MI0000456	hsa-miR-140-3p	MIMAT0004597	4	6	69933146	69933168	chr16	+	0	ACAGGGTAGAACCACGGACAGGA	ACAGGGTAGAACCACGGACAGGA	not reported	not reported	not reported	not reported	2.07628e-15	1.49809e-14	3.9667	2.65691	1.46056	1.59077	3.52034	1.27476	2.55667	1.36505	False	False	False	True	False	False
miR-141-3p__mir-141__0__+1__23M	hsa-mir-141	MI0000457	hsa-miR-141-3p	MIMAT0000432	0	1	6964155	6964177	chr12	+	0	TAACACTGTCTGGTAAAGATGGC	TAACACTGTCTGGTAAAGATGGC	not reported	not reported	not reported	not reported	1.8642e-21	4.49235e-20	68.7821	78.4201	382.089	428.964	43.6617	280.928	77.7899	316.842	False	False	True	False	False	False
miR-210-3p__mir-210__0__0__22M	hsa-mir-210	MI0000286	hsa-miR-210-3p	MIMAT0000267	0	0	568112	568133	chr11	-	0	CTGTGCGTGTGACAGCGGCTGA	CTGTGCGTGTGACAGCGGCTGA	not reported	not reported	not reported	not reported	3.27934e-24	2.949e-22	29.7761	7.91931	846.894	894.656	13.0403	463.891	7.70675	567.473	False	False	True	False	False	False
miR-183-5p__mir-183__+2__0__20M	hsa-mir-183	MI0000273	hsa-miR-183-5p	MIMAT0000261	2	0	129774967	129774986	chr7	-	0	TGGCACTGGTAGAATTCACT	TGGCACTGGTAGAATTCACT	not reported	not reported	not reported	not reported	7.94108e-09	1.97163e-08	1.92239	1.77695	10.1083	6.24435	1.59217	5.31219	1.49158	3.48966	False	False	True	False	False	False
miR-142-5p__mir-142__0__+1__22M	hsa-mir-142	MI0000458	hsa-miR-142-5p	MIMAT0000433	0	1	58331282	58331303	chr17	-	0	CATAAAGTAGAAAGCACTACTA	CATAAAGTAGAAAGCACTACTA	not reported	not reported	not reported	not reported	1.19334e-07	2.63149e-07	0.500913	0.666097	1.48035	1.75271	0.421795	1.17978	0.531463	1.45437	False	False	True	False	False	False
let-7e-5p__let-7e__0__-6__16M	hsa-let-7e	MI0000066	hsa-let-7e-5p	MIMAT0000066	0	-6	51692793	51692808	chr19	+	0	TGAGGTAGGAGGTTGT	TGAGGTAGGAGGTTGT	not reported	not reported	not reported	not reported	3.90361e-06	7.49615e-06	8.85546	11.3547	8.43817	4.63877	7.31482	4.17279	11.134	3.98281	False	False	False	True	False	False
miR-100-5p__mir-100__+1__-2__19M	hsa-mir-100	MI0000102	hsa-miR-100-5p	MIMAT0000098	1	-2	122152277	122152295	chr11	-	0	ACCCGTAGATCCGAACTTG	ACCCGTAGATCCGAACTTG	not reported	not reported	not reported	not reported	5.4193e-05	9.4028e-05	2.20244	2.1568	8.40785	4.40038	1.74784	4.08936	1.9414	2.70324	False	False	True	False	False	False
miR-1843__mir-1843__0__+1__21M	hsa-mir-1843	MI0032314	hsa-miR-1843	MIMAT0039764	0	1	175968439	175968459	chr1	-	0	TATGGAGGTCTCTGTCTGGCT	TATGGAGGTCTCTGTCTGGCT	not reported	not reported	not reported	not reported	0.0331547	0.0420507	3.67963	2.38444	4.54654	3.86776	3.33619	3.82988	2.11245	3.20716	False	False	True	False	False	False
miR-101-3p__mir-101-1__-1__-3__19M	hsa-mir-101-1	MI0000103	hsa-miR-101-3p	MIMAT0000099	-1	-3	65058445	65058463	chr1	-	0	GTACAGTACTGTGATAACT	GTACAGTACTGTGATAACT	not reported	not reported	not reported	not reported	0.00179757	0.00265956	18.8414	21.9426	13.9799	13.4117	11.9694	12.0275	19.1609	11.5919	False	False	False	False	True	False
miR-145-3p__mir-145__+2__0__20M	hsa-mir-145	MI0000461	hsa-miR-145-3p	MIMAT0004601	2	0	149430701	149430720	chr5	+	0	ATTCCTGGAAATACTGTTCT	ATTCCTGGAAATACTGTTCT	not reported	not reported	not reported	not reported	6.02615e-13	2.66728e-12	44.6133	40.7374	10.188	11.7735	28.3426	8.60612	39.2406	9.32835	False	False	False	True	False	False
miR-589-5p__mir-589__0__-1__21M	hsa-mir-589	MI0003599	hsa-miR-589-5p	MIMAT0004799	0	-1	5495874	5495894	chr7	-	0	TGAGAACCACGTCTGCTCTGA	TGAGAACCACGTCTGCTCTGA	not reported	not reported	not reported	not reported	0.000100559	0.000170542	54.3362	36.09	61.0013	72.229	42.0851	53.4236	35.0016	59.7182	False	False	True	False	False	False
miR-17-5p__mir-17__0__0__23M	hsa-mir-17	MI0000071	hsa-miR-17-5p	MIMAT0000070	0	0	91350618	91350640	chr13	+	0	CAAAGTGCTTACAGTGCAGGTAG	CAAAGTGCTTACAGTGCAGGTAG	not reported	not reported	not reported	not reported	3.54927e-12	1.34734e-11	93.6122	127.789	260.438	242.434	78.7101	201.769	125.665	206.431	False	False	True	False	False	False
miR-25-3p__mir-25__0__-6__16M	hsa-mir-25	MI0000082	hsa-miR-25-3p	MIMAT0000081	0	-6	100093577	100093592	chr7	-	0	CATTGCACTTGTCTCG	CATTGCACTTGTCTCG	not reported	not reported	not reported	not reported	0.00664209	0.00921346	202.108	267.222	182.231	131.387	162.507	116.485	219.925	102.731	False	False	False	True	False	False
miR-1-3p__mir-1-1__0__-2__20M	hsa-mir-1-1	MI0000651	hsa-miR-1-3p	MIMAT0000416	0	-2	62554351	62554370	chr20	+	0	TGGAATGTAAAGAAGTATGT	TGGAATGTAAAGAAGTATGT	not reported	not reported	not reported	not reported	2.44292e-12	9.59265e-12	10.8628	9.77766	1.69467	1.59125	6.62008	1.17578	8.96669	1.18543	False	False	False	True	False	False
miR-26b-5p__mir-26b__0__-4__17M	hsa-mir-26b	MI0000084	hsa-miR-26b-5p	MIMAT0000083	0	-4	218402657	218402673	chr2	+	0	TTCAAGTAATTCAGGAT	TTCAAGTAATTCAGGAT	not reported	not reported	not reported	not reported	8.28729e-06	1.54008e-05	20.8204	26.0031	43.7625	75.027	13.7775	29.224	19.9883	45.5859	False	False	True	False	False	False
miR-143-3p__mir-143__+4__+1__18M	hsa-mir-143	MI0000459	hsa-miR-143-3p	MIMAT0000435	4	1	149428982	149428999	chr5	+	0	ATGAAGCACTGTAGCTCA	ATGAAGCACTGTAGCTCA	not reported	not reported	not reported	not reported	4.27956e-15	2.93285e-14	109.437	92.3483	12.0783	7.68873	47.3916	5.0446	74.2758	2.93609	False	False	False	True	False	False
miR-9-5p__mir-9-1__+2__0__21M	hsa-mir-9-1	MI0000466	hsa-miR-9-5p	MIMAT0000441	2	0	156420392	156420412	chr1	-	0	TTTGGTTATCTAGCTGTATGA	TTTGGTTATCTAGCTGTATGA	not reported	not reported	not reported	not reported	6.35746e-11	1.99319e-10	0.966311	0.529076	24.3919	21.819	0.495755	4.33329	0.425566	4.30102	False	False	True	False	False	False
miR-181a-5p__mir-181a-1__0__-6__17M	hsa-mir-181a-1	MI0000289	hsa-miR-181a-5p	MIMAT0000256	0	-6	198859114	198859130	chr1	-	0	AACATTCAACGCTGTCG	AACATTCAACGCTGTCG	not reported	not reported	not reported	not reported	0.00015093	0.000250216	30.4437	27.2696	38.3259	36.5366	20.0258	30.4625	16.7932	31.2454	False	False	True	False	False	False
miR-145-3p__mir-145__0__0__22M	hsa-mir-145	MI0000461	hsa-miR-145-3p	MIMAT0004601	0	0	149430699	149430720	chr5	+	0	GGATTCCTGGAAATACTGTTCT	GGATTCCTGGAAATACTGTTCT	not reported	not reported	not reported	not reported	3.28274e-07	6.92021e-07	11.1508	10.6306	6.46169	6.60692	9.8295	5.33598	10.1966	5.57302	False	False	False	True	False	False
miR-16-5p__mir-16-1__+3__0__19M	hsa-mir-16-1	MI0000070	hsa-miR-16-5p	MIMAT0000069	3	0	50049027	50049045	chr13	-	0	CAGCACGTAAATATTGGCG	CAGCACGTAAATATTGGCG	not reported	not reported	not reported	not reported	0.00210114	0.00308396	0.901909	0.674388	1.78264	1.54125	0.743343	1.34296	0.603222	1.0415	False	False	True	False	False	False
miR-144-3p__mir-144__0__0__20M	hsa-mir-144	MI0000460	hsa-miR-144-3p	MIMAT0000436	0	0	28861548	28861567	chr17	-	0	TACAGTATAGATGATGTACT	TACAGTATAGATGATGTACT	not reported	not reported	not reported	not reported	1.833e-08	4.40853e-08	13.1054	25.7308	3.03603	3.67585	6.74424	1.95766	14.8822	2.21237	False	False	False	True	False	False
miR-1468-5p__mir-1468__0__+1__22M	hsa-mir-1468	MI0003782	hsa-miR-1468-5p	MIMAT0006789	0	1	63786054	63786075	chrX	-	0	CTCCGTTTGCCTGTTTCGCTGA	CTCCGTTTGCCTGTTTCGCTGA	not reported	not reported	not reported	not reported	1.46354e-06	2.91749e-06	5.10798	3.30353	3.2358	3.92358	4.36336	2.46682	3.1036	3.15218	False	False	False	False	False	True
miR-126-5p__mir-126__0__+1__22M	hsa-mir-126	MI0000471	hsa-miR-126-5p	MIMAT0000444	0	1	136670616	136670637	chr9	+	0	CATTATTACTTTTGGTACGCGC	CATTATTACTTTTGGTACGCGC	not reported	not reported	not reported	not reported	1.73756e-13	8.66899e-13	4.87861	8.22834	1.54353	1.71803	3.87577	1.25503	7.36317	1.43036	False	False	False	True	False	False
miR-1307-5p__mir-1307__0__+2__23M	hsa-mir-1307	MI0006444	hsa-miR-1307-5p	MIMAT0022727	0	2	103394339	103394361	chr10	-	0	TCGACCGGACCTCGACCGGCTCG	TCGACCGGACCTCGACCGGCTCG	not reported	not reported	not reported	not reported	2.41485e-18	2.96785e-17	1.86914	2.2924	9.91732	11.0065	1.53911	6.96647	2.23883	8.44829	False	False	True	False	False	False
miR-409-3p__mir-409__0__0__22M	hsa-mir-409	MI0001735	hsa-miR-409-3p	MIMAT0001639	0	0	101065346	101065367	chr14	+	0	GAATGTTGCTCGGTGAACCCCT	GAATGTTGCTCGGTGAACCCCT	not reported	not reported	not reported	not reported	0.000120248	0.000201868	2.46912	1.59736	4.57456	3.63274	1.4624	2.6694	1.28077	2.82093	False	False	True	False	False	False
miR-1287-3p__mir-1287__0__0__22M	hsa-mir-1287	MI0006349	hsa-miR-1287-3p	MIMAT0026738	0	0	98395232	98395253	chr10	-	0	CTCTAGCCACAGATGCAGTGAT	CTCTAGCCACAGATGCAGTGAT	not reported	not reported	not reported	not reported	2.58452e-21	5.91872e-20	0.37716	0.128165	5.45702	4.8139	0.294245	3.66627	0.11374	3.82992	False	False	True	False	False	False
miR-21-3p__mir-21__+2__+1__20M	hsa-mir-21	MI0000077	hsa-miR-21-3p	MIMAT0004494	2	1	59841313	59841332	chr17	+	0	ACACCAGTCGATGGGCTGTC	ACACCAGTCGATGGGCTGTC	not reported	not reported	not reported	not reported	2.03179e-16	1.76264e-15	0.871262	0.513849	4.44619	5.35601	0.69914	3.31273	0.375499	3.90968	False	False	True	False	False	False
miR-30a-3p__mir-30a__+1__-2__19M	hsa-mir-30a	MI0000088	hsa-miR-30a-3p	MIMAT0000088	1	-2	71403556	71403574	chr6	-	0	TTTCAGTCGGATGTTTGCA	TTTCAGTCGGATGTTTGCA	not reported	not reported	not reported	not reported	3.41609e-20	5.96967e-19	190.869	161.005	32.1858	21.8967	135.076	21.6953	138.843	14.7444	False	False	False	True	False	False
miR-142-3p__mir-142__0__-2__21M	hsa-mir-142	MI0000458	hsa-miR-142-3p	MIMAT0000434	0	-2	58331247	58331267	chr17	-	0	TGTAGTGTTTCCTACTTTATG	TGTAGTGTTTCCTACTTTATG	not reported	not reported	not reported	not reported	2.85547e-15	2.02463e-14	5.73622	7.02978	42.8866	41.6059	4.0981	24.7384	6.89689	28.5639	False	False	True	False	False	False
miR-155-5p__mir-155__0__-1__23M	hsa-mir-155	MI0000681	hsa-miR-155-5p	MIMAT0000646	0	-1	25573983	25574005	chr21	+	0	TTAATGCTAATCGTGATAGGGGT	TTAATGCTAATCGTGATAGGGGT	not reported	not reported	not reported	not reported	3.06119e-07	6.4754e-07	30.9115	34.458	71.1468	68.1797	26.1511	50.9923	31.1675	52.7826	False	False	True	False	False	False
miR-550a-5p__mir-550a-1__0__-2__21M	hsa-mir-550a-1	MI0003600	hsa-miR-550a-5p	MIMAT0004800	0	-2	30289815	30289835	chr7	+	0	AGTGCCTGAGGGAGTAAGAGC	AGTGCCTGAGGGAGTAAGAGC	not reported	not reported	not reported	not reported	1.83592e-06	3.63927e-06	0.621358	0.595543	1.64046	1.73241	0.487871	1.21189	0.438256	1.29368	False	False	True	False	False	False
miR-423-3p__mir-423__-1__-2__22M	hsa-mir-423	MI0001445	hsa-miR-423-3p	MIMAT0001340	-1	-2	30117130	30117151	chr17	+	0	AAGCTCGGTCTGAGGCCCCTCA	AAGCTCGGTCTGAGGCCCCTCA	not reported	not reported	not reported	not reported	6.18302e-05	0.000106827	5.51254	2.39571	5.34895	5.37075	3.14661	4.56497	2.27234	4.87318	False	False	True	False	False	False
miR-181b-5p__mir-181b-1__-1__-2__22M	hsa-mir-181b-1	MI0000270	hsa-miR-181b-5p	MIMAT0000257	-1	-2	198858927	198858948	chr1	-	0	CAACATTCATTGCTGTCGGTGG	CAACATTCATTGCTGTCGGTGG	not reported	not reported	not reported	not reported	7.21846e-06	1.34893e-05	1.99405	3.22726	4.16932	4.41287	1.70418	3.32648	3.05686	3.64021	False	False	True	False	False	False
miR-140-3p__mir-140__+1__+1__21M	hsa-mir-140	MI0000456	hsa-miR-140-3p	MIMAT0004597	1	1	69933143	69933163	chr16	+	0	ACCACAGGGTAGAACCACGGA	ACCACAGGGTAGAACCACGGA	not reported	not reported	not reported	not reported	1.01704e-21	2.75724e-20	205.942	246.926	80.3317	81.9242	193.573	70.0527	218.382	73.1239	False	False	False	True	False	False
miR-423-5p__mir-423__0__-1__22M	hsa-mir-423	MI0001445	hsa-miR-423-5p	MIMAT0004748	0	-1	30117095	30117116	chr17	+	0	TGAGGGGCAGAGAGCGAGACTT	TGAGGGGCAGAGAGCGAGACTT	not reported	not reported	not reported	not reported	1.6149e-09	4.30834e-09	13.6893	6.09282	3.93493	3.42276	7.77525	3.29184	6.03364	3.06278	False	False	False	True	False	False
miR-181a-2-3p__mir-181a-2__0__-2__20M	hsa-mir-181a-2	MI0000269	hsa-miR-181a-2-3p	MIMAT0004558	0	-2	124692518	124692537	chr9	+	0	ACCACTGACCGTTGACTGTA	ACCACTGACCGTTGACTGTA	not reported	not reported	not reported	not reported	0.0114076	0.0153447	141.182	145.821	127.483	132.679	133.308	101.8	137.014	97.013	False	False	False	True	False	False
miR-15b-5p__mir-15b__0__-2__20M	hsa-mir-15b	MI0000438	hsa-miR-15b-5p	MIMAT0000417	0	-2	160404607	160404626	chr3	+	0	TAGCAGCACATCATGGTTTA	TAGCAGCACATCATGGTTTA	not reported	not reported	not reported	not reported	4.54698e-12	1.68489e-11	38.5124	36.8385	15.1252	16.7824	30.8451	13.2283	29.6289	14.3123	False	False	False	True	False	False
miR-106b-3p__mir-106b__-2__-2__22M	hsa-mir-106b	MI0000734	hsa-miR-106b-3p	MIMAT0004672	-2	-2	100094004	100094025	chr7	-	0	TACCGCACTGTGGGTACTTGCT	TACCGCACTGTGGGTACTTGCT	not reported	not reported	not reported	not reported	0.00983221	0.0132984	5.94879	9.55343	7.94417	9.83525	5.15774	6.15046	7.15033	8.14213	True	False	False	False	False	False
miR-150-5p__mir-150__-2__-7__17M	hsa-mir-150	MI0000479	hsa-miR-150-5p	MIMAT0000451	-2	-7	49500839	49500855	chr19	-	0	TGTCTCCCAACCCTTGT	TGTCTCCCAACCCTTGT	not reported	not reported	not reported	not reported	2.0812e-05	3.72857e-05	0.759935	0.426659	2.0731	2.81375	0.484994	1.33493	0.332996	1.67317	False	False	True	False	False	False
miR-361-5p__mir-361__0__-6__16M	hsa-mir-361	MI0000760	hsa-miR-361-5p	MIMAT0000703	0	-6	85903687	85903702	chrX	-	0	TTATCAGAATCTCCAG	TTATCAGAATCTCCAG	not reported	not reported	not reported	not reported	5.34079e-05	9.27096e-05	7.82531	7.26502	6.19771	4.10202	6.43262	4.00731	6.82264	3.2259	False	False	False	True	False	False
miR-30a-3p__mir-30a__+1__-4__17M	hsa-mir-30a	MI0000088	hsa-miR-30a-3p	MIMAT0000088	1	-4	71403558	71403574	chr6	-	0	TTTCAGTCGGATGTTTG	TTTCAGTCGGATGTTTG	not reported	not reported	not reported	not reported	4.16028e-15	2.86175e-14	44.2041	45.2848	12.1146	11.0129	33.4405	7.33823	37.5444	6.858	False	False	False	True	False	False
miR-142-3p__mir-142__0__-3__20M	hsa-mir-142	MI0000458	hsa-miR-142-3p	MIMAT0000434	0	-3	58331248	58331267	chr17	-	0	TGTAGTGTTTCCTACTTTAT	TGTAGTGTTTCCTACTTTAT	not reported	not reported	not reported	not reported	2.30053e-09	6.01422e-09	0.528103	0.557036	2.92464	2.22501	0.445801	1.71048	0.52412	1.53165	False	False	True	False	False	False
miR-1247-5p__mir-1247__0__0__22M	hsa-mir-1247	MI0006382	hsa-miR-1247-5p	MIMAT0005899	0	0	101560362	101560383	chr14	-	0	ACCCGTCCCGTTCGTCCCCGGA	ACCCGTCCCGTTCGTCCCCGGA	not reported	not reported	not reported	not reported	2.12808e-09	5.57262e-09	13.9955	4.72605	3.5378	3.72889	6.876	2.01815	4.32894	1.85139	False	False	False	True	False	False
miR-24-3p__mir-24-1__-1__-2__21M	hsa-mir-24-1	MI0000080	hsa-miR-24-3p	MIMAT0000080	-1	-2	95086063	95086083	chr9	+	0	CTGGCTCAGTTCAGCAGGAAC	CTGGCTCAGTTCAGCAGGAAC	not reported	not reported	not reported	not reported	2.83643e-05	5.01098e-05	2.39972	3.00885	4.39994	4.63889	2.18666	3.6881	2.72341	3.94422	False	False	True	False	False	False
miR-27a-5p__mir-27a__0__-1__21M	hsa-mir-27a	MI0000085	hsa-miR-27a-5p	MIMAT0004501	0	-1	13836488	13836508	chr19	-	0	AGGGCTTAGCTGCTTGTGAGC	AGGGCTTAGCTGCTTGTGAGC	not reported	not reported	not reported	not reported	0.000594306	0.000925732	2.90538	8.16632	1.55455	1.53924	2.00134	1.21151	5.32335	1.27877	False	False	False	True	False	False
miR-660-5p__mir-660__0__+1__23M	hsa-mir-660	MI0003684	hsa-miR-660-5p	MIMAT0003338	0	1	50013256	50013278	chrX	+	0	TACCCATTGCATATCGGAGTTGT	TACCCATTGCATATCGGAGTTGT	not reported	not reported	not reported	not reported	0.0117667	0.0157931	15.0759	26.264	22.2689	28.7618	10.0861	17.7833	25.7244	21.2488	False	False	False	False	True	False
miR-532-5p__mir-532__0__-5__17M	hsa-mir-532	MI0003205	hsa-miR-532-5p	MIMAT0002888	0	-5	50003167	50003183	chrX	+	0	CATGCCTTGAGTGTAGG	CATGCCTTGAGTGTAGG	not reported	not reported	not reported	not reported	7.49031e-09	1.866e-08	18.0956	30.121	68.1768	98.4924	10.4938	37.2889	24.961	53.0834	False	False	True	False	False	False
miR-183-5p__mir-183__-1__-3__20M	hsa-mir-183	MI0000273	hsa-miR-183-5p	MIMAT0000261	-1	-3	129774970	129774989	chr7	-	0	GTATGGCACTGGTAGAATTC	GTATGGCACTGGTAGAATTC	not reported	not reported	not reported	not reported	1.50617e-08	3.64864e-08	0.44701	0.578095	1.65862	1.76626	0.37777	1.25407	0.517107	1.42269	False	False	True	False	False	False
miR-423-3p__mir-423__0__-4__19M	hsa-mir-423	MI0001445	hsa-miR-423-3p	MIMAT0001340	0	-4	30117131	30117149	chr17	+	0	AGCTCGGTCTGAGGCCCCT	AGCTCGGTCTGAGGCCCCT	not reported	not reported	not reported	not reported	6.66449e-11	2.07709e-10	1.27307	0.961869	3.39199	2.95955	0.98816	2.72477	0.950429	2.38928	False	False	True	False	False	False
miR-1285-5p__mir-1285-1__+1__-1__19M	hsa-mir-1285-1	MI0006346	hsa-miR-1285-5p	MIMAT0022719	1	-1	92204068	92204086	chr7	-	0	ATCTCACTTTGTTGCCCAG	ATCTCACTTTGTTGCCCAG	not reported	not reported	not reported	not reported	0.00293556	0.00423782	0.992661	1.58129	2.24769	2.2975	0.841035	1.65114	1.50605	1.6257	False	False	True	False	False	False
miR-335-3p__mir-335__0__-3__19M	hsa-mir-335	MI0000816	hsa-miR-335-3p	MIMAT0004703	0	-3	130496162	130496180	chr7	+	0	TTTTTCATTATTGCTCCTG	TTTTTCATTATTGCTCCTG	not reported	not reported	not reported	not reported	9.06221e-07	1.83081e-06	1.62584	1.42305	5.49628	5.76892	1.19142	3.46909	1.30964	3.7604	False	False	True	False	False	False
miR-214-5p__mir-214__0__0__22M	hsa-mir-214	MI0000290	hsa-miR-214-5p	MIMAT0004564	0	0	172138857	172138878	chr1	-	0	TGCCTGTCTACACTTGCTGTGC	TGCCTGTCTACACTTGCTGTGC	not reported	not reported	not reported	not reported	2.72294e-08	6.43558e-08	6.83579	6.10778	14.9823	15.02	5.82726	11.5257	6.03517	12.1332	False	False	True	False	False	False
miR-29a-5p__mir-29a__0__0__22M	hsa-mir-29a	MI0000087	hsa-miR-29a-5p	MIMAT0004503	0	0	130876786	130876807	chr7	-	0	ACTGATTTCTTTTGGTGTTCAG	ACTGATTTCTTTTGGTGTTCAG	not reported	not reported	not reported	not reported	3.06939e-17	3.01782e-16	0.799954	1.11265	4.52234	4.6952	0.689868	3.39388	0.934828	3.88544	False	False	True	False	False	False
miR-10401-3p__mir-10401__-1__-2__20M	hsa-mir-10401	MI0033425	hsa-miR-10401-3p	MIMAT0041634	-1	-2	8206597	8206616	chr21	+	0	GACCTCGCCGTCCCGCCCGC	GACCTCGCCGTCCCGCCCGC	not reported	not reported	not reported	not reported	5.37644e-10	1.51436e-09	4.4817	0.184827	4.77345	3.67805	1.06998	2.42176	0.166743	2.79129	False	False	True	False	False	False
miR-10399-5p__mir-10399__+2__+1__20M	hsa-mir-10399	MI0033423	hsa-miR-10399-5p	MIMAT0041629	2	1	139044136	139044155	chr7	-	0	TTACAGATTGTCTCAGAGAA	TTACAGATTGTCTCAGAGAA	not reported	not reported	not reported	not reported	2.82044e-05	4.9899e-05	4.58975	3.80634	2.0531	1.78057	3.15057	1.60821	3.53076	1.50125	False	False	False	True	False	False
miR-378a-3p__mir-378a__0__0__22M	hsa-mir-378a	MI0000786	hsa-miR-378a-3p	MIMAT0000732	0	0	149732867	149732888	chr5	+	0	ACTGGACTTGGAGTCAGAAGGC	ACTGGACTTGGAGTCAGAAGGC	not reported	not reported	not reported	not reported	9.0236e-24	5.94107e-22	742.21	800.691	160.761	156.925	550.957	129.539	685.403	122.835	False	False	False	True	False	False
miR-101-5p__mir-101-1__-1__-2__21M	hsa-mir-101-1	MI0000103	hsa-miR-101-5p	MIMAT0004513	-1	-2	65058479	65058499	chr1	-	0	TCAGTTATCACAGTGCTGATG	TCAGTTATCACAGTGCTGATG	not reported	not reported	not reported	not reported	1.55438e-05	2.81899e-05	3.54707	4.30098	2.00892	1.9668	2.75208	1.77003	3.77637	1.73027	False	False	False	True	False	False
miR-204-5p__mir-204__0__0__22M	hsa-mir-204	MI0000284	hsa-miR-204-5p	MIMAT0000265	0	0	70810031	70810052	chr9	-	0	TTCCCTTTGTCATCCTATGCCT	TTCCCTTTGTCATCCTATGCCT	not reported	not reported	not reported	not reported	7.03226e-06	1.31614e-05	3.34728	3.20525	2.42598	3.44866	2.69279	1.38037	3.00292	1.64997	False	False	False	True	False	False
miR-33a-5p__mir-33a__0__0__21M	hsa-mir-33a	MI0000091	hsa-miR-33a-5p	MIMAT0000091	0	0	41900949	41900969	chr22	+	0	GTGCATTGTAGTTGCATTGCA	GTGCATTGTAGTTGCATTGCA	not reported	not reported	not reported	not reported	8.26803e-20	1.34292e-18	0.501938	0.245802	5.90054	6.6932	0.396165	3.60023	0.229421	4.7938	False	False	True	False	False	False
miR-200b-5p__mir-200b__0__-1__21M	hsa-mir-200b	MI0000342	hsa-miR-200b-5p	MIMAT0004571	0	-1	1167124	1167144	chr1	+	0	CATCTTACTGGGCAGCATTGG	CATCTTACTGGGCAGCATTGG	not reported	not reported	not reported	not reported	9.35933e-10	2.57521e-09	7.94421	2.07924	7.38415	7.14264	2.78098	5.75358	1.91354	5.78065	False	False	True	False	False	False
miR-671-5p__mir-671__0__0__23M	hsa-mir-671	MI0003760	hsa-miR-671-5p	MIMAT0003880	0	0	151238449	151238471	chr7	+	0	AGGAAGCCCTGGAGGGGCTGGAG	AGGAAGCCCTGGAGGGGCTGGAG	not reported	not reported	not reported	not reported	1.32263e-15	9.85894e-15	0.421484	0.30814	2.03432	2.27332	0.351931	1.66402	0.262981	1.87344	False	False	True	False	False	False
miR-708-3p__mir-708__0__0__22M	hsa-mir-708	MI0005543	hsa-miR-708-3p	MIMAT0004927	0	0	79402032	79402053	chr11	-	0	CAACTAGACTGTGAGCTTCTAG	CAACTAGACTGTGAGCTTCTAG	not reported	not reported	not reported	not reported	2.61275e-24	2.47005e-22	0.480325	0.563522	5.62398	6.33064	0.419639	4.256	0.539519	5.43471	False	False	True	False	False	False
miR-1299__mir-1299__0__-5__17M	hsa-mir-1299	MI0006359	hsa-miR-1299	MIMAT0005887	0	-5	40929015	40929031	chr9	-	0	TTCTGGAATTCTGTGTG	TTCTGGAATTCTGTGTG	not reported	not reported	not reported	not reported	6.22473e-06	1.17274e-05	0.856941	7.56254	2.34135	5.71935	0.522877	0.945039	3.85449	2.7599	False	False	False	False	True	False
miR-24-3p__mir-24-1__+2__0__20M	hsa-mir-24-1	MI0000080	hsa-miR-24-3p	MIMAT0000080	2	0	95086066	95086085	chr9	+	0	GCTCAGTTCAGCAGGAACAG	GCTCAGTTCAGCAGGAACAG	not reported	not reported	not reported	not reported	0.000463771	0.000730425	1.83146	1.89354	3.61498	3.76785	1.42921	2.74843	1.64734	2.87154	False	False	True	False	False	False
miR-144-5p__mir-144__0__0__22M	hsa-mir-144	MI0000460	hsa-miR-144-5p	MIMAT0004600	0	0	28861583	28861604	chr17	-	0	GGATATCATCATATACTGTAAG	GGATATCATCATATACTGTAAG	not reported	not reported	not reported	not reported	7.43488e-13	3.20988e-12	853.979	1234.08	89.0145	106.56	347.752	51.7487	947.001	55.7683	False	False	False	True	False	False
miR-28-5p__mir-28__0__-2__20M	hsa-mir-28	MI0000086	hsa-miR-28-5p	MIMAT0000085	0	-2	188688794	188688813	chr3	+	0	AAGGAGCTCACAGTCTATTG	AAGGAGCTCACAGTCTATTG	not reported	not reported	not reported	not reported	0.00993439	0.0134316	11.5527	13.9874	15.5631	15.2934	9.24855	14.1954	13.2438	14.1928	False	False	True	False	False	False
miR-181a-2-3p__mir-181a-2__0__-6__16M	hsa-mir-181a-2	MI0000269	hsa-miR-181a-2-3p	MIMAT0004558	0	-6	124692518	124692533	chr9	+	0	ACCACTGACCGTTGAC	ACCACTGACCGTTGAC	not reported	not reported	not reported	not reported	9.01433e-05	0.000153585	1.78542	1.28335	7.70229	2.57694	1.27609	2.59542	1.00725	1.90555	False	False	True	False	False	False
miR-148a-5p__mir-148a__-1__-2__21M	hsa-mir-148a	MI0000253	hsa-miR-148a-5p	MIMAT0004549	-1	-2	25949962	25949982	chr7	-	0	CAAAGTTCTGAGACACTCCGA	CAAAGTTCTGAGACACTCCGA	not reported	not reported	not reported	not reported	1.30071e-08	3.17807e-08	3.32099	3.26184	6.69914	8.94246	2.65117	5.40407	3.19153	7.37785	False	False	True	False	False	False
miR-200a-3p__mir-200a__0__-3__19M	hsa-mir-200a	MI0000737	hsa-miR-200a-3p	MIMAT0000682	0	-3	1167916	1167934	chr1	+	0	TAACACTGTCTGGTAACGA	TAACACTGTCTGGTAACGA	not reported	not reported	not reported	not reported	4.94355e-09	1.24756e-08	1.43484	1.18534	5.2657	4.41319	1.17573	3.39822	1.13794	3.05965	False	False	True	False	False	False
miR-183-5p__mir-183__+2__-3__17M	hsa-mir-183	MI0000273	hsa-miR-183-5p	MIMAT0000261	2	-3	129774970	129774986	chr7	-	0	TGGCACTGGTAGAATTC	TGGCACTGGTAGAATTC	not reported	not reported	not reported	not reported	7.97205e-15	5.24874e-14	0.146549	0.133386	2.73353	2.53877	0.125083	1.57811	0.116209	1.50301	False	False	True	False	False	False
miR-200a-5p__mir-200a__0__+1__23M	hsa-mir-200a	MI0000737	hsa-miR-200a-5p	MIMAT0001620	0	1	1167878	1167900	chr1	+	0	CATCTTACCGGACAGTGCTGGAT	CATCTTACCGGACAGTGCTGGAT	not reported	not reported	not reported	not reported	4.77238e-19	6.51694e-18	1.02716	0.549978	5.3876	6.02083	0.778594	4.01953	0.50422	4.75504	False	False	True	False	False	False
miR-21-5p__mir-21__+3__0__19M	hsa-mir-21	MI0000077	hsa-miR-21-5p	MIMAT0000076	3	0	59841276	59841294	chr17	+	0	CTTATCAGACTGATGTTGA	CTTATCAGACTGATGTTGA	not reported	not reported	not reported	not reported	7.33229e-19	9.86648e-18	6.96648	7.75504	41.9557	33.9828	4.74256	30.475	7.41116	25.3163	False	False	True	False	False	False
miR-135b-5p__mir-135b__0__-1__22M	hsa-mir-135b	MI0000810	hsa-miR-135b-5p	MIMAT0000758	0	-1	205448362	205448383	chr1	-	0	TATGGCTTTTCATTCCTATGTG	TATGGCTTTTCATTCCTATGTG	not reported	not reported	not reported	not reported	1.00853e-17	1.0747e-16	4.44984	6.7524	41.7979	35.4931	3.33333	24.3974	5.88508	19.7392	False	False	True	False	False	False
miR-200b-5p__mir-200b__0__0__22M	hsa-mir-200b	MI0000342	hsa-miR-200b-5p	MIMAT0004571	0	0	1167124	1167145	chr1	+	0	CATCTTACTGGGCAGCATTGGA	CATCTTACTGGGCAGCATTGGA	not reported	not reported	not reported	not reported	4.81988e-12	1.77709e-11	8.60553	1.99124	8.6571	8.62932	2.97316	6.87496	1.88043	7.22882	False	False	True	False	False	False
miR-142-5p__mir-142__-2__-1__22M	hsa-mir-142	MI0000458	hsa-miR-142-5p	MIMAT0000433	-2	-1	58331284	58331305	chr17	-	0	CCCATAAAGTAGAAAGCACTAC	CCCATAAAGTAGAAAGCACTAC	not reported	not reported	not reported	not reported	0.020933	0.0271283	6.02759	8.29521	9.14456	10.6267	4.56915	7.47394	7.72449	8.57231	True	False	False	False	False	False
let-7a-5p__let-7a-1__+4__0__18M	hsa-let-7a-1	MI0000060	hsa-let-7a-5p	MIMAT0000062	4	0	94175966	94175983	chr9	+	0	GTAGTAGGTTGTATAGTT	GTAGTAGGTTGTATAGTT	not reported	not reported	not reported	not reported	0.00409206	0.0058275	8.04973	4.62755	4.69349	4.2627	5.13353	3.15988	4.28363	2.40905	False	False	False	True	False	False
miR-182-5p__mir-182__+1__-2__21M	hsa-mir-182	MI0000272	hsa-miR-182-5p	MIMAT0000259	1	-2	129770449	129770469	chr7	-	0	TTGGCAATGGTAGAACTCACA	TTGGCAATGGTAGAACTCACA	not reported	not reported	not reported	not reported	1.30908e-14	8.25057e-14	1.93079	2.13695	8.265	7.57005	1.56815	5.71671	1.84263	5.87103	False	False	True	False	False	False
miR-24-3p__mir-24-1__0__+1__23M	hsa-mir-24-1	MI0000080	hsa-miR-24-3p	MIMAT0000080	0	1	95086064	95086086	chr9	+	0	TGGCTCAGTTCAGCAGGAACAGG	TGGCTCAGTTCAGCAGGAACAGG	not reported	not reported	not reported	not reported	0.030157	0.0384337	3.69728	4.29244	4.25748	7.06002	3.21169	3.07158	4.2809	4.54369	False	False	False	False	False	True
miR-642a-5p__mir-642a__0__0__22M	hsa-mir-642a	MI0003657	hsa-miR-642a-5p	MIMAT0003312	0	0	45674943	45674964	chr19	+	0	GTCCCTCTCCAAATGTGTCTTG	GTCCCTCTCCAAATGTGTCTTG	not reported	not reported	not reported	not reported	2.79325e-08	6.59329e-08	4.68091	0.344515	3.58322	3.66029	1.3295	2.58186	0.321517	2.88225	False	False	True	False	False	False
miR-21-5p__mir-21__+5__+6__23M	hsa-mir-21	MI0000077	hsa-miR-21-5p	MIMAT0000076	5	6	59841278	59841300	chr17	+	0	TATCAGACTGATGTTGACTGTTG	TATCAGACTGATGTTGACTGTTG	not reported	not reported	not reported	not reported	2.10651e-19	3.10668e-18	0.290693	0.27811	3.41612	2.50143	0.230452	2.36632	0.253531	1.92919	False	False	True	False	False	False
miR-145-5p__mir-145__+1__0__22M	hsa-mir-145	MI0000461	hsa-miR-145-5p	MIMAT0000437	1	0	149430662	149430683	chr5	+	0	TCCAGTTTTCCCAGGAATCCCT	TCCAGTTTTCCCAGGAATCCCT	not reported	not reported	not reported	not reported	0.00159506	0.00237328	5.12819	2.22577	2.27861	1.98619	3.35752	1.79779	2.14727	1.58903	False	False	False	True	False	False
miR-30e-5p__mir-30e__+1__-1__20M	hsa-mir-30e	MI0000749	hsa-miR-30e-5p	MIMAT0000692	1	-1	40754372	40754391	chr1	+	0	GTAAACATCCTTGACTGGAA	GTAAACATCCTTGACTGGAA	not reported	not reported	not reported	not reported	1.2119e-21	3.16899e-20	1.46556	1.15746	16.2437	14.104	1.24594	9.46948	1.10441	8.96038	False	False	True	False	False	False
miR-22-3p__mir-22__0__0__22M	hsa-mir-22	MI0000078	hsa-miR-22-3p	MIMAT0000077	0	0	1713914	1713935	chr17	-	0	AAGCTGCCAGTTGAAGAACTGT	AAGCTGCCAGTTGAAGAACTGT	not reported	not reported	not reported	not reported	7.28636e-06	1.36093e-05	42968.2	52986.8	63810.8	67686.7	35547	58883.6	52799.7	63283.7	False	False	True	False	False	False
miR-30e-3p__mir-30e__0__-4__18M	hsa-mir-30e	MI0000749	hsa-miR-30e-3p	MIMAT0000693	0	-4	40754413	40754430	chr1	+	0	CTTTCAGTCGGATGTTTA	CTTTCAGTCGGATGTTTA	not reported	not reported	not reported	not reported	0.00901874	0.012243	47.1192	50.266	39.0648	43.0176	35.1397	29.1637	47.0171	25.7588	False	False	False	True	False	False
miR-145-5p__mir-145__0__-3__20M	hsa-mir-145	MI0000461	hsa-miR-145-5p	MIMAT0000437	0	-3	149430661	149430680	chr5	+	0	GTCCAGTTTTCCCAGGAATC	GTCCAGTTTTCCCAGGAATC	not reported	not reported	not reported	not reported	0.000885576	0.00135258	85.653	55.1111	55.285	58.789	70.1142	43.0164	50.741	45.1233	False	False	False	True	False	False
miR-574-3p__mir-574__0__0__22M	hsa-mir-574	MI0003581	hsa-miR-574-3p	MIMAT0003239	0	0	38868092	38868113	chr4	+	0	CACGCTCATGCACACACCCACA	CACGCTCATGCACACACCCACA	not reported	not reported	not reported	not reported	0.000335339	0.000535005	122.786	27.3021	57.0517	58.8782	44.8075	46.7756	27.1489	51.3473	False	False	True	False	False	False
miR-181a-5p__mir-181a-1__+2__-1__20M	hsa-mir-181a-1	MI0000289	hsa-miR-181a-5p	MIMAT0000256	2	-1	198859109	198859128	chr1	-	0	CATTCAACGCTGTCGGTGAG	CATTCAACGCTGTCGGTGAG	not reported	not reported	not reported	not reported	0.00903664	0.0122628	2.02692	1.09634	1.466	0.992979	1.14559	1.1361	1.05683	0.709977	False	True	False	False	False	False
miR-100-5p__mir-100__+2__-1__19M	hsa-mir-100	MI0000102	hsa-miR-100-5p	MIMAT0000098	2	-1	122152276	122152294	chr11	-	0	CCCGTAGATCCGAACTTGT	CCCGTAGATCCGAACTTGT	not reported	not reported	not reported	not reported	1.44748e-09	3.89553e-09	1.10296	0.988149	10.3128	3.15489	0.905153	3.28738	0.93787	1.6744	False	False	True	False	False	False
miR-30d-5p__mir-30d__0__-4__18M	hsa-mir-30d	MI0000255	hsa-miR-30d-5p	MIMAT0000245	0	-4	134804923	134804940	chr8	-	0	TGTAAACATCCCCGACTG	TGTAAACATCCCCGACTG	not reported	not reported	not reported	not reported	0.0120452	0.0161552	63.8616	66.6169	64.0043	62.3994	56.8975	42.3194	64.6336	41.7579	False	False	False	True	False	False
miR-338-5p__mir-338__0__-1__21M	hsa-mir-338	MI0000814	hsa-miR-338-5p	MIMAT0004701	0	-1	81125924	81125944	chr17	-	0	AACAATATCCTGGTGCTGAGT	AACAATATCCTGGTGCTGAGT	not reported	not reported	not reported	not reported	1.02624e-16	9.3657e-16	18.4836	24	6.99702	4.18199	16.2101	4.35435	23.7085	3.24108	False	False	False	True	False	False
miR-744-3p__mir-744__0__-1__21M	hsa-mir-744	MI0005559	hsa-miR-744-3p	MIMAT0004946	0	-1	12081966	12081986	chr17	+	0	CTGTTGCCACTAACCTCAACC	CTGTTGCCACTAACCTCAACC	not reported	not reported	not reported	not reported	9.47679e-15	6.10856e-14	2.24925	0.939764	9.01432	7.79366	1.6369	6.20725	0.926689	6.0107	False	False	True	False	False	False
miR-34c-3p__mir-34c__+1__+1__22M	hsa-mir-34c	MI0000743	hsa-miR-34c-3p	MIMAT0004677	1	1	111513485	111513506	chr11	+	0	ATCACTAACCACACGGCCAGGT	ATCACTAACCACACGGCCAGGT	not reported	not reported	not reported	not reported	0.000611303	0.000951403	4.20526	2.2251	2.10336	3.07365	2.31002	0.908535	1.62113	1.35276	False	False	False	True	False	False
miR-425-5p__mir-425__0__+2__25M	hsa-mir-425	MI0001448	hsa-miR-425-5p	MIMAT0003393	0	2	49020197	49020221	chr3	-	0	AATGACACGATCACTCCCGTTGAGT	AATGACACGATCACTCCCGTTGAGT	not reported	not reported	not reported	not reported	2.9446e-11	9.62478e-11	1.52773	1.23118	5.22598	6.51999	1.2101	3.64949	0.988091	4.83884	False	False	True	False	False	False
miR-429__mir-429__-1__-1__22M	hsa-mir-429	MI0001641	hsa-miR-429	MIMAT0001536	-1	-1	1169054	1169075	chr1	+	0	CTAATACTGTCTGGTAAAACCG	CTAATACTGTCTGGTAAAACCG	not reported	not reported	not reported	not reported	7.70017e-14	4.18739e-13	0.336592	0.383231	1.9508	2.37529	0.295793	1.48554	0.373368	1.8245	False	False	True	False	False	False
miR-200a-5p__mir-200a__+1__+1__22M	hsa-mir-200a	MI0000737	hsa-miR-200a-5p	MIMAT0001620	1	1	1167879	1167900	chr1	+	0	ATCTTACCGGACAGTGCTGGAT	ATCTTACCGGACAGTGCTGGAT	not reported	not reported	not reported	not reported	3.62118e-16	3.00029e-15	1.52855	1.693	6.60677	7.23445	1.28835	5.06708	1.66236	6.00695	False	False	True	False	False	False
miR-127-5p__mir-127__0__-1__21M	hsa-mir-127	MI0000472	hsa-miR-127-5p	MIMAT0004604	0	-1	100883001	100883021	chr14	+	0	CTGAAGCTCAGAGGGCTCTGA	CTGAAGCTCAGAGGGCTCTGA	not reported	not reported	not reported	not reported	8.51619e-14	4.57714e-13	16.5851	19.8769	96.2008	53.7724	13.6515	49.8789	14.8315	41.8601	False	False	True	False	False	False
miR-148a-3p__mir-148a__+1__+1__22M	hsa-mir-148a	MI0000253	hsa-miR-148a-3p	MIMAT0000243	1	1	25949921	25949942	chr7	-	0	CAGTGCACTACAGAACTTTGTC	CAGTGCACTACAGAACTTTGTC	not reported	not reported	not reported	not reported	0.0170704	0.0224461	1.93708	2.71489	4.45347	3.5933	1.6553	3.0559	2.53986	2.75688	False	False	True	False	False	False
miR-181b-5p__mir-181b-1__0__-1__22M	hsa-mir-181b-1	MI0000270	hsa-miR-181b-5p	MIMAT0000257	0	-1	198858926	198858947	chr1	-	0	AACATTCATTGCTGTCGGTGGG	AACATTCATTGCTGTCGGTGGG	not reported	not reported	not reported	not reported	7.65129e-05	0.000131211	143.364	157.543	222.693	232.681	134.8	183.459	153.93	200.808	False	False	True	False	False	False
miR-21-5p__mir-21__+1__0__21M	hsa-mir-21	MI0000077	hsa-miR-21-5p	MIMAT0000076	1	0	59841274	59841294	chr17	+	0	AGCTTATCAGACTGATGTTGA	AGCTTATCAGACTGATGTTGA	not reported	not reported	not reported	not reported	8.91535e-21	1.74845e-19	33.0585	44.9671	129.983	112.409	18.2865	107.935	43.2594	104.395	False	False	True	False	False	False
miR-199b-3p__mir-199b__0__-1__21M	hsa-mir-199b	MI0000282	hsa-miR-199b-3p	MIMAT0004563	0	-1	128244746	128244766	chr9	-	0	ACAGTAGTCTGCACATTGGTT	ACAGTAGTCTGCACATTGGTT	not reported	not reported	not reported	not reported	1.51076e-09	4.04567e-09	325.827	419.875	755.229	772.944	260.975	616.069	409.847	657.749	False	False	True	False	False	False
miR-320a-3p__mir-320a__0__-1__21M	hsa-mir-320a	MI0000542	hsa-miR-320a-3p	MIMAT0000510	0	-1	22244976	22244996	chr8	-	0	AAAAGCTGGGTTGAGAGGGCG	AAAAGCTGGGTTGAGAGGGCG	not reported	not reported	not reported	not reported	2.65122e-10	7.73342e-10	86.5112	61.0888	44.1141	39.854	75.6811	37.7796	55.9835	34.4033	False	False	False	True	False	False
miR-181d-5p__mir-181d__0__0__23M	hsa-mir-181d	MI0003139	hsa-miR-181d-5p	MIMAT0002821	0	0	13874910	13874932	chr19	+	0	AACATTCATTGTTGTCGGTGGGT	AACATTCATTGTTGTCGGTGGGT	not reported	not reported	not reported	not reported	0.000344629	0.000549112	2.26036	3.48867	3.80317	5.7918	1.95522	3.04713	3.41716	4.16269	True	False	False	False	False	False
miR-23b-3p__mir-23b__+1__-3__19M	hsa-mir-23b	MI0000439	hsa-miR-23b-3p	MIMAT0000418	1	-3	95085266	95085284	chr9	+	0	TCACATTGCCAGGGATTAC	TCACATTGCCAGGGATTAC	not reported	not reported	not reported	not reported	0.000109834	0.000185462	9.11783	7.05957	6.96718	4.84306	7.00061	5.31439	6.54443	3.31377	False	False	False	True	False	False
miR-21-3p__mir-21__0__-2__19M	hsa-mir-21	MI0000077	hsa-miR-21-3p	MIMAT0004494	0	-2	59841311	59841329	chr17	+	0	CAACACCAGTCGATGGGCT	CAACACCAGTCGATGGGCT	not reported	not reported	not reported	not reported	6.75523e-22	1.90126e-20	9.73152	7.00062	72.9241	65.2242	6.43627	48.2537	6.63144	34.9101	False	False	True	False	False	False
miR-505-3p__mir-505__0__-2__20M	hsa-mir-505	MI0003190	hsa-miR-505-3p	MIMAT0002876	0	-2	139924162	139924181	chrX	-	0	CGTCAACACTTGCTGGTTTC	CGTCAACACTTGCTGGTTTC	not reported	not reported	not reported	not reported	2.49571e-09	6.48921e-09	1.47985	0.822631	3.99487	3.86886	1.22506	3.05115	0.8008	3.01166	False	False	True	False	False	False
miR-151a-3p__mir-151a__-2__-6__17M	hsa-mir-151a	MI0000809	hsa-miR-151a-3p	MIMAT0000757	-2	-6	140732593	140732609	chr8	-	0	TACTAGACTGAAGCTCC	TACTAGACTGAAGCTCC	not reported	not reported	not reported	not reported	0.0257414	0.0329658	0.981838	1.2603	1.2147	1.25951	0.740424	1.04614	1.07864	1.12831	True	False	False	False	False	False
miR-200a-5p__mir-200a__+1__0__21M	hsa-mir-200a	MI0000737	hsa-miR-200a-5p	MIMAT0001620	1	0	1167879	1167899	chr1	+	0	ATCTTACCGGACAGTGCTGGA	ATCTTACCGGACAGTGCTGGA	not reported	not reported	not reported	not reported	2.30162e-09	6.01422e-09	7.26379	6.5869	19.3292	18.7794	5.96274	14.261	6.21963	14.6911	False	False	True	False	False	False
miR-23a-3p__mir-23a__+1__-2__18M	hsa-mir-23a	MI0000079	hsa-miR-23a-3p	MIMAT0000078	1	-2	13836597	13836614	chr19	-	0	TCACATTGCCAGGGATTT	TCACATTGCCAGGGATTT	not reported	not reported	not reported	not reported	0.0209312	0.0271283	4.66501	4.61662	9.66097	5.78219	3.6442	3.63788	4.57947	2.21107	False	False	False	True	False	False
miR-874-3p__mir-874__0__0__22M	hsa-mir-874	MI0005532	hsa-miR-874-3p	MIMAT0004911	0	0	137647582	137647603	chr5	-	0	CTGCCCTGGCCCGAGGGACCGA	CTGCCCTGGCCCGAGGGACCGA	not reported	not reported	not reported	not reported	0.00244986	0.00357162	9.80037	4.25913	8.74908	7.20624	5.87149	7.16367	3.88088	6.22469	False	False	True	False	False	False
miR-374a-5p__mir-374a__0__-2__20M	hsa-mir-374a	MI0000782	hsa-miR-374a-5p	MIMAT0000727	0	-2	74287327	74287346	chrX	-	0	TTATAATACAACCTGATAAG	TTATAATACAACCTGATAAG	not reported	not reported	not reported	not reported	3.46295e-12	1.32036e-11	12.5386	15.3455	4.30821	5.05635	8.2453	3.79556	14.8806	4.63203	False	False	False	True	False	False
miR-15b-3p__mir-15b__0__0__22M	hsa-mir-15b	MI0000438	hsa-miR-15b-3p	MIMAT0004586	0	0	160404645	160404666	chr3	+	0	CGAATCATTATTTGCTGCTCTA	CGAATCATTATTTGCTGCTCTA	not reported	not reported	not reported	not reported	3.42387e-07	7.19715e-07	2.71327	5.09876	5.87414	5.94576	2.31062	4.77578	4.74993	5.04115	False	False	True	False	False	False
miR-125b-5p__mir-125b-1__0__-2__20M	hsa-mir-125b-1	MI0000446	hsa-miR-125b-5p	MIMAT0000423	0	-2	122099811	122099830	chr11	-	0	TCCCTGAGACCCTAACTTGT	TCCCTGAGACCCTAACTTGT	not reported	not reported	not reported	not reported	1.50357e-06	2.99496e-06	62.3557	29.2505	26.4646	25.4879	43.7655	21.2114	28.7572	20.2012	False	False	False	True	False	False
miR-7704__mir-7704__0__-2__17M	hsa-mir-7704	MI0025240	hsa-miR-7704	MIMAT0030019	0	-2	176188843	176188859	chr2	+	0	CGGGGTCGGCGGCGACG	CGGGGTCGGCGGCGACG	not reported	not reported	not reported	not reported	3.35088e-12	1.28294e-11	22.1899	10.2377	4.07587	3.60818	11.7831	2.78004	8.83987	2.43248	False	False	False	True	False	False
miR-181b-3p__mir-181b-1__0__-1__20M	hsa-mir-181b-1	MI0000270	hsa-miR-181b-3p	MIMAT0022692	0	-1	198858888	198858907	chr1	-	0	CTCACTGAACAATGAATGCA	CTCACTGAACAATGAATGCA	not reported	not reported	not reported	not reported	2.8517e-16	2.41152e-15	2.58974	2.99117	10.1315	9.18778	2.07577	7.87921	2.76097	7.5741	False	False	True	False	False	False
miR-150-5p__mir-150__-2__-1__23M	hsa-mir-150	MI0000479	hsa-miR-150-5p	MIMAT0000451	-2	-1	49500833	49500855	chr19	-	0	TGTCTCCCAACCCTTGTACCAGT	TGTCTCCCAACCCTTGTACCAGT	not reported	not reported	not reported	not reported	0.000166997	0.000275612	21.0266	2.00386	8.58987	8.08119	4.12955	5.74687	1.96791	6.17969	False	False	True	False	False	False
let-7i-5p__let-7i__0__-3__19M	hsa-let-7i	MI0000434	hsa-let-7i-5p	MIMAT0000415	0	-3	62603691	62603709	chr12	+	0	TGAGGTAGTAGTTTGTGCT	TGAGGTAGTAGTTTGTGCT	not reported	not reported	not reported	not reported	0.000972746	0.00147593	6.48164	7.76986	5.33019	4.46659	5.45914	4.3818	7.19173	3.67445	False	False	False	True	False	False
miR-30a-3p__mir-30a__0__-1__21M	hsa-mir-30a	MI0000088	hsa-miR-30a-3p	MIMAT0000088	0	-1	71403555	71403575	chr6	-	0	CTTTCAGTCGGATGTTTGCAG	CTTTCAGTCGGATGTTTGCAG	not reported	not reported	not reported	not reported	2.41766e-23	1.20458e-21	5862.75	5853.61	1237.98	1006.29	5100.24	897.073	5536.19	709.145	False	False	False	True	False	False
miR-429__mir-429__0__-2__20M	hsa-mir-429	MI0001641	hsa-miR-429	MIMAT0001536	0	-2	1169055	1169074	chr1	+	0	TAATACTGTCTGGTAAAACC	TAATACTGTCTGGTAAAACC	not reported	not reported	not reported	not reported	1.7773e-11	5.98438e-11	1.59933	1.81377	5.09356	4.81634	1.3503	3.85565	1.78221	3.98876	False	False	True	False	False	False
miR-29a-3p__mir-29a__0__+1__23M	hsa-mir-29a	MI0000087	hsa-miR-29a-3p	MIMAT0000086	0	1	130876747	130876769	chr7	-	0	TAGCACCATCTGAAATCGGTTAT	TAGCACCATCTGAAATCGGTTAT	not reported	not reported	not reported	not reported	0.0148825	0.0197594	80.1786	90.2394	89.395	116.68	71.9715	67.041	89.0653	90.1256	False	False	False	False	False	True
miR-10a-5p__mir-10a__+4__-2__17M	hsa-mir-10a	MI0000266	hsa-miR-10a-5p	MIMAT0000253	4	-2	48579906	48579922	chr17	-	0	CTGTAGATCCGAATTTG	CTGTAGATCCGAATTTG	not reported	not reported	not reported	not reported	2.40594e-11	7.97724e-11	0.122044	0.0708805	2.60579	1.33479	0.0810064	1.13053	0.0663008	0.894781	False	False	True	False	False	False
let-7a-5p__let-7a-1__-1__0__23M	hsa-let-7a-1	MI0000060	hsa-let-7a-5p	MIMAT0000062	-1	0	94175961	94175983	chr9	+	0	ATGAGGTAGTAGGTTGTATAGTT	ATGAGGTAGTAGGTTGTATAGTT	not reported	not reported	not reported	not reported	1.52076e-11	5.15827e-11	2.96246	3.21613	1.38579	1.42439	2.6569	1.20359	2.93881	1.25671	False	False	False	True	False	False
miR-425-5p__mir-425__0__0__23M	hsa-mir-425	MI0001448	hsa-miR-425-5p	MIMAT0003393	0	0	49020199	49020221	chr3	-	0	AATGACACGATCACTCCCGTTGA	AATGACACGATCACTCCCGTTGA	not reported	not reported	not reported	not reported	1.68561e-12	6.82948e-12	26.5402	31.0962	59.5101	83.9656	24.1768	47.5211	29.467	66.9874	False	False	True	False	False	False
miR-30e-5p__mir-30e__+1__+2__23M	hsa-mir-30e	MI0000749	hsa-miR-30e-5p	MIMAT0000692	1	2	40754372	40754394	chr1	+	0	GTAAACATCCTTGACTGGAAGCT	GTAAACATCCTTGACTGGAAGCT	not reported	not reported	not reported	not reported	3.63086e-24	3.11325e-22	15.971	14.3998	329.959	328.852	12.1614	209.001	13.8838	242.514	False	False	True	False	False	False
miR-21-5p__mir-21__+4__-1__17M	hsa-mir-21	MI0000077	hsa-miR-21-5p	MIMAT0000076	4	-1	59841277	59841293	chr17	+	0	TTATCAGACTGATGTTG	TTATCAGACTGATGTTG	not reported	not reported	not reported	not reported	8.12349e-24	5.54654e-22	0.647439	0.565527	20.6335	20.8756	0.54648	10.6382	0.551873	12.0817	False	False	True	False	False	False
miR-103a-3p__mir-103a-1__+3__0__20M	hsa-mir-103a-1	MI0000109	hsa-miR-103a-3p	MIMAT0000101	3	0	168560904	168560923	chr5	-	0	AGCATTGTACAGGGCTATGA	AGCATTGTACAGGGCTATGA	not reported	not reported	not reported	not reported	0.00288744	0.00417327	6.61442	7.77303	5.51015	4.8973	5.77582	4.33253	7.34035	3.93123	False	False	False	True	False	False
miR-92a-3p__mir-92a-1__0__-1__21M	hsa-mir-92a-1	MI0000093	hsa-miR-92a-3p	MIMAT0000092	0	-1	91351361	91351381	chr13	+	0	TATTGCACTTGTCCCGGCCTG	TATTGCACTTGTCCCGGCCTG	not reported	not reported	not reported	not reported	0.0116574	0.0156618	432.7	203.278	328.344	287.134	260.781	269.021	198.527	254.668	False	False	True	False	False	False
miR-183-5p__mir-183__0__-1__21M	hsa-mir-183	MI0000273	hsa-miR-183-5p	MIMAT0000261	0	-1	129774968	129774988	chr7	-	0	TATGGCACTGGTAGAATTCAC	TATGGCACTGGTAGAATTCAC	not reported	not reported	not reported	not reported	6.96695e-18	7.71385e-17	144.547	138.037	688.993	644.439	124.169	462.381	130.082	482.952	False	False	True	False	False	False
miR-551b-3p__mir-551b__0__0__21M	hsa-mir-551b	MI0003575	hsa-miR-551b-3p	MIMAT0003233	0	0	168551914	168551934	chr3	+	0	GCGACCCATACTTGGTTTCAG	GCGACCCATACTTGGTTTCAG	not reported	not reported	not reported	not reported	6.32878e-06	1.19113e-05	0.693802	0.71993	3.70112	4.73671	0.553166	1.94868	0.655857	1.66017	False	False	True	False	False	False
miR-374a-5p__mir-374a__0__0__22M	hsa-mir-374a	MI0000782	hsa-miR-374a-5p	MIMAT0000727	0	0	74287325	74287346	chrX	-	0	TTATAATACAACCTGATAAGTG	TTATAATACAACCTGATAAGTG	not reported	not reported	not reported	not reported	2.80952e-10	8.17576e-10	35.9885	55.9202	16.0363	19.3908	19.9661	14.1825	54.8472	16.7083	False	False	False	True	False	False
miR-500a-5p__mir-500a__0__0__23M	hsa-mir-500a	MI0003184	hsa-miR-500a-5p	MIMAT0004773	0	0	50008443	50008465	chrX	+	0	TAATCCTTGCTACCTGGGTGAGA	TAATCCTTGCTACCTGGGTGAGA	not reported	not reported	not reported	not reported	0.0014787	0.00220816	1.14254	2.35983	1.98802	2.64707	1.01932	1.61215	2.17378	2.04322	False	False	False	False	True	False
miR-23b-3p__mir-23b__+1__+1__23M	hsa-mir-23b	MI0000439	hsa-miR-23b-3p	MIMAT0000418	1	1	95085266	95085288	chr9	+	0	TCACATTGCCAGGGATTACCACG	TCACATTGCCAGGGATTACCACG	not reported	not reported	not reported	not reported	2.84977e-05	5.03213e-05	2.93527	0.518031	3.14689	2.65141	1.51661	2.35929	0.490181	2.22795	False	False	True	False	False	False
miR-10399-5p__mir-10399__+2__0__19M	hsa-mir-10399	MI0033423	hsa-miR-10399-5p	MIMAT0041629	2	0	139044137	139044155	chr7	-	0	TTACAGATTGTCTCAGAGA	TTACAGATTGTCTCAGAGA	not reported	not reported	not reported	not reported	0.000109859	0.000185462	4.83649	3.76684	2.50683	1.86713	3.39064	1.91142	3.26781	1.47833	False	False	False	True	False	False
miR-99b-5p__mir-99b__+2__0__20M	hsa-mir-99b	MI0000746	hsa-miR-99b-5p	MIMAT0000689	2	0	51692620	51692639	chr19	+	0	CCCGTAGAACCGACCTTGCG	CCCGTAGAACCGACCTTGCG	not reported	not reported	not reported	not reported	0.00579028	0.00811123	5.00616	1.22483	2.81636	1.90808	2.55934	2.12493	1.1848	1.3643	False	False	False	False	False	True
miR-92b-3p__mir-92b__0__-1__21M	hsa-mir-92b	MI0003560	hsa-miR-92b-3p	MIMAT0003218	0	-1	155195237	155195257	chr1	+	0	TATTGCACTCGTCCCGGCCTC	TATTGCACTCGTCCCGGCCTC	not reported	not reported	not reported	not reported	0.0030707	0.00442772	33.8215	15.3803	34.1651	32.2807	20.62	27.481	14.2522	26.3167	False	False	True	False	False	False
miR-21-5p__mir-21__+2__+1__21M	hsa-mir-21	MI0000077	hsa-miR-21-5p	MIMAT0000076	2	1	59841275	59841295	chr17	+	0	GCTTATCAGACTGATGTTGAC	GCTTATCAGACTGATGTTGAC	not reported	not reported	not reported	not reported	6.83991e-17	6.48297e-16	1.82906	3.04377	27.3956	12.6695	1.1235	11.3466	2.79608	5.3197	False	False	True	False	False	False
miR-200b-3p__mir-200b__0__-3__19M	hsa-mir-200b	MI0000342	hsa-miR-200b-3p	MIMAT0000318	0	-3	1167160	1167178	chr1	+	0	TAATACTGCCTGGTAATGA	TAATACTGCCTGGTAATGA	not reported	not reported	not reported	not reported	0.00637348	0.00887426	5.13374	4.98839	9.5512	8.19154	4.02697	6.98649	4.7101	6.12692	False	False	True	False	False	False
miR-200c-3p__mir-200c__+2__0__21M	hsa-mir-200c	MI0000650	hsa-miR-200c-3p	MIMAT0000617	2	0	6963744	6963764	chr12	+	0	ATACTGCCGGGTAATGATGGA	ATACTGCCGGGTAATGATGGA	not reported	not reported	not reported	not reported	8.20523e-07	1.66315e-06	2.11265	1.65507	5.48632	4.17513	1.16677	3.21092	1.54518	1.76032	False	False	True	False	False	False
miR-203b-3p__mir-203b__0__-6__17M	hsa-mir-203b	MI0017343	hsa-miR-203b-3p	MIMAT0019814	0	-6	104117434	104117450	chr14	-	0	TTGAACTGTTAAGAACC	TTGAACTGTTAAGAACC	not reported	not reported	not reported	not reported	1.6354e-06	3.25227e-06	0.648905	1.08184	3.85172	4.9384	0.477699	1.99653	0.976234	2.44696	False	False	True	False	False	False
miR-1299__mir-1299__0__-2__20M	hsa-mir-1299	MI0006359	hsa-miR-1299	MIMAT0005887	0	-2	40929012	40929031	chr9	-	0	TTCTGGAATTCTGTGTGAGG	TTCTGGAATTCTGTGTGAGG	not reported	not reported	not reported	not reported	2.31264e-05	4.12316e-05	7.36743	51.1609	5.7403	12.3634	2.64071	2.245	25.0944	5.21401	False	False	False	True	False	False
miR-99b-5p__mir-99b__+1__-1__20M	hsa-mir-99b	MI0000746	hsa-miR-99b-5p	MIMAT0000689	1	-1	51692619	51692638	chr19	+	0	ACCCGTAGAACCGACCTTGC	ACCCGTAGAACCGACCTTGC	not reported	not reported	not reported	not reported	4.64534e-06	8.86509e-06	49.8405	32.0542	31.3111	23.6774	42.5233	22.8362	30.2832	18.112	False	False	False	True	False	False
miR-145-5p__mir-145__0__-2__21M	hsa-mir-145	MI0000461	hsa-miR-145-5p	MIMAT0000437	0	-2	149430661	149430681	chr5	+	0	GTCCAGTTTTCCCAGGAATCC	GTCCAGTTTTCCCAGGAATCC	not reported	not reported	not reported	not reported	0.00975365	0.0132067	460.335	234.156	265.979	273.115	329.449	207.725	224.856	215.514	False	False	False	True	False	False
miR-451a__mir-451a__+1__-1__20M	hsa-mir-451a	MI0001729	hsa-miR-451a	MIMAT0001631	1	-1	28861404	28861423	chr17	-	0	AACCGTTACCATTACTGAGT	AACCGTTACCATTACTGAGT	not reported	not reported	not reported	not reported	4.20218e-13	1.91514e-12	37.34	57.2102	6.86795	5.30809	19.8353	3.42398	38.9347	2.49024	False	False	False	True	False	False
let-7e-5p__let-7e__0__-5__17M	hsa-let-7e	MI0000066	hsa-let-7e-5p	MIMAT0000066	0	-5	51692793	51692809	chr19	+	0	TGAGGTAGGAGGTTGTA	TGAGGTAGGAGGTTGTA	not reported	not reported	not reported	not reported	0.000144878	0.000240615	10.6186	10.7687	4.29276	4.64824	6.03592	3.10116	7.64339	3.63785	False	False	False	True	False	False
miR-324-5p__mir-324__0__-1__21M	hsa-mir-324	MI0000813	hsa-miR-324-5p	MIMAT0000761	0	-1	7223344	7223364	chr17	-	0	CGCATCCCCTAGGGCATTGGT	CGCATCCCCTAGGGCATTGGT	not reported	not reported	not reported	not reported	3.43721e-08	8.04125e-08	3.80985	1.57905	5.55516	6.19334	2.00739	4.2135	1.41348	4.57837	False	False	True	False	False	False
miR-451a__mir-451a__+2__-1__19M	hsa-mir-451a	MI0001729	hsa-miR-451a	MIMAT0001631	2	-1	28861404	28861422	chr17	-	0	ACCGTTACCATTACTGAGT	ACCGTTACCATTACTGAGT	not reported	not reported	not reported	not reported	0.000806191	0.00123814	5.15385	7.06709	4.55345	3.77618	2.78287	2.40451	4.28375	1.33104	False	False	False	True	False	False
miR-141-5p__mir-141__0__-2__20M	hsa-mir-141	MI0000457	hsa-miR-141-5p	MIMAT0004598	0	-2	6964113	6964132	chr12	+	0	CATCTTCCAGTACAGTGTTG	CATCTTCCAGTACAGTGTTG	not reported	not reported	not reported	not reported	1.66927e-21	4.10308e-20	2.16327	1.11789	20.777	22.3532	1.78598	12.9001	1.07113	12.1586	False	False	True	False	False	False
miR-532-3p__mir-532__0__-2__20M	hsa-mir-532	MI0003205	hsa-miR-532-3p	MIMAT0004780	0	-2	50003204	50003223	chrX	+	0	CCTCCCACACCCAAGGCTTG	CCTCCCACACCCAAGGCTTG	not reported	not reported	not reported	not reported	0.0252878	0.0324187	6.33204	0.973817	2.22636	2.34029	1.78659	1.66986	0.84417	1.79786	False	False	False	False	False	True
miR-29b-3p__mir-29b-1__0__-3__20M	hsa-mir-29b-1	MI0000105	hsa-miR-29b-3p	MIMAT0000100	0	-3	130877470	130877489	chr7	-	0	TAGCACCATTTGAAATCAGT	TAGCACCATTTGAAATCAGT	not reported	not reported	not reported	not reported	0.000188035	0.000307991	44.0217	48.7045	76.4865	101.501	25.4815	59.6846	46.0462	75.9609	False	False	True	False	False	False
miR-146b-5p__mir-146b__-1__-1__23M	hsa-mir-146b	MI0003129	hsa-miR-146b-5p	MIMAT0002809	-1	-1	102436519	102436541	chr10	+	0	CTGAGAACTGAATTCCATAGGCT	CTGAGAACTGAATTCCATAGGCT	not reported	not reported	not reported	not reported	8.26491e-18	9.0156e-17	0.0527786	0.190625	1.63338	1.43826	0.0442161	1.18047	0.170968	1.15017	False	False	True	False	False	False
miR-27a-5p__mir-27a__0__0__22M	hsa-mir-27a	MI0000085	hsa-miR-27a-5p	MIMAT0004501	0	0	13836487	13836508	chr19	-	0	AGGGCTTAGCTGCTTGTGAGCA	AGGGCTTAGCTGCTTGTGAGCA	not reported	not reported	not reported	not reported	2.56286e-07	5.46832e-07	22.1864	55.3985	9.38748	10.4302	14.964	7.10585	39.4741	7.95916	False	False	False	True	False	False
miR-30a-3p__mir-30a__0__+1__23M	hsa-mir-30a	MI0000088	hsa-miR-30a-3p	MIMAT0000088	0	1	71403553	71403575	chr6	-	0	CTTTCAGTCGGATGTTTGCAGCT	CTTTCAGTCGGATGTTTGCAGCT	not reported	not reported	not reported	not reported	4.71386e-20	8.04629e-19	39.8952	44.0317	13.114	10.8723	36.304	8.83995	41.5848	7.75553	False	False	False	True	False	False
miR-19b-3p__mir-19b-1__0__0__23M	hsa-mir-19b-1	MI0000074	hsa-miR-19b-3p	MIMAT0000074	0	0	91351245	91351267	chr13	+	0	TGTGCAAATCCATGCAAAACTGA	TGTGCAAATCCATGCAAAACTGA	not reported	not reported	not reported	not reported	2.30104e-08	5.48057e-08	19.2077	30.3677	51.7678	52.1708	12.4867	38.5622	29.9103	42.2696	False	False	True	False	False	False
miR-181b-3p__mir-181b-1__0__+1__22M	hsa-mir-181b-1	MI0000270	hsa-miR-181b-3p	MIMAT0022692	0	1	198858886	198858907	chr1	-	0	CTCACTGAACAATGAATGCAAC	CTCACTGAACAATGAATGCAAC	not reported	not reported	not reported	not reported	1.38062e-08	3.35995e-08	0.39946	0.556137	1.66735	1.17734	0.345788	1.15614	0.477221	0.994234	False	False	True	False	False	False
miR-126-3p__mir-126__+1__-1__20M	hsa-mir-126	MI0000471	hsa-miR-126-3p	MIMAT0000445	1	-1	136670654	136670673	chr9	+	0	CGTACCGTGAGTAATAATGC	CGTACCGTGAGTAATAATGC	not reported	not reported	not reported	not reported	7.36502e-10	2.04172e-09	48.0866	63.4391	20.6367	17.9548	34.8803	16.2391	56.7876	14.9151	False	False	False	True	False	False
miR-2355-5p__mir-2355__0__+1__22M	hsa-mir-2355	MI0015873	hsa-miR-2355-5p	MIMAT0016895	0	1	207110042	207110063	chr2	-	0	ATCCCCAGATACAATGGACAAT	ATCCCCAGATACAATGGACAAT	not reported	not reported	not reported	not reported	3.12443e-14	1.87314e-13	8.86697	12.2176	30.1819	35.8178	6.83793	22.386	11.8525	27.1945	False	False	True	False	False	False
miR-93-5p__mir-93__0__-4__19M	hsa-mir-93	MI0000095	hsa-miR-93-5p	MIMAT0000093	0	-4	100093819	100093837	chr7	-	0	CAAAGTGCTGTTCGTGCAG	CAAAGTGCTGTTCGTGCAG	not reported	not reported	not reported	not reported	3.0989e-07	6.5439e-07	8.82431	11.5405	20.5009	19.1981	7.64543	15.8323	10.8672	15.1245	False	False	True	False	False	False
miR-192-5p__mir-192__+1__0__20M	hsa-mir-192	MI0000234	hsa-miR-192-5p	MIMAT0000222	1	0	64891203	64891222	chr11	-	0	TGACCTATGAATTGACAGCC	TGACCTATGAATTGACAGCC	not reported	not reported	not reported	not reported	0.0294472	0.0375682	15.5484	13.1337	47.4369	17.086	6.60156	10.3606	9.38822	5.80595	False	False	False	False	True	False
miR-1307-3p__mir-1307__0__-5__17M	hsa-mir-1307	MI0006444	hsa-miR-1307-3p	MIMAT0005951	0	-5	103394306	103394322	chr10	-	0	ACTCGGCGTGGCGTCGG	ACTCGGCGTGGCGTCGG	not reported	not reported	not reported	not reported	1.68529e-09	4.47349e-09	11.8757	7.66018	24.5844	28.9543	7.19741	18.501	6.51344	22.7994	False	False	True	False	False	False
miR-21-3p__mir-21__0__-4__17M	hsa-mir-21	MI0000077	hsa-miR-21-3p	MIMAT0004494	0	-4	59841311	59841327	chr17	+	0	CAACACCAGTCGATGGG	CAACACCAGTCGATGGG	not reported	not reported	not reported	not reported	6.94748e-25	1.40427e-22	6.79867	4.82035	82.9763	50.162	4.56464	51.9154	4.02474	28.3439	False	False	True	False	False	False
miR-10a-5p__mir-10a__+4__-1__18M	hsa-mir-10a	MI0000266	hsa-miR-10a-5p	MIMAT0000253	4	-1	48579905	48579922	chr17	-	0	CTGTAGATCCGAATTTGT	CTGTAGATCCGAATTTGT	not reported	not reported	not reported	not reported	1.2482e-13	6.44553e-13	0.785235	0.84274	12.614	7.23385	0.670858	4.50717	0.673451	4.17064	False	False	True	False	False	False
miR-452-5p__mir-452__+3__+2__21M	hsa-mir-452	MI0001733	hsa-miR-452-5p	MIMAT0001635	3	2	151959676	151959696	chrX	-	0	TGTTTGCAGAGGAAACTGAGA	TGTTTGCAGAGGAAACTGAGA	not reported	not reported	not reported	not reported	0.0067703	0.00935962	32.9188	35.3167	25.9006	25.3728	18.5208	15.6683	32.1113	14.2822	False	False	False	True	False	False
miR-505-3p__mir-505__+1__+1__22M	hsa-mir-505	MI0003190	hsa-miR-505-3p	MIMAT0002876	1	1	139924159	139924180	chrX	-	0	GTCAACACTTGCTGGTTTCCTC	GTCAACACTTGCTGGTTTCCTC	not reported	not reported	not reported	not reported	0.0287043	0.0366838	1.74783	1.0653	1.43705	1.42286	0.994012	1.20547	1.00021	1.23781	False	False	True	False	False	False
miR-194-5p__mir-194-1__0__-1__21M	hsa-mir-194-1	MI0000488	hsa-miR-194-5p	MIMAT0000460	0	-1	220118207	220118227	chr1	-	0	TGTAACAGCAACTCCATGTGG	TGTAACAGCAACTCCATGTGG	not reported	not reported	not reported	not reported	0.00148024	0.00220957	65.4692	63.827	236.308	68.5775	38.3899	59.6169	55.4339	34.8984	False	False	False	False	True	False
miR-106b-3p__mir-106b__-1__-1__22M	hsa-mir-106b	MI0000734	hsa-miR-106b-3p	MIMAT0004672	-1	-1	100094003	100094024	chr7	-	0	ACCGCACTGTGGGTACTTGCTG	ACCGCACTGTGGGTACTTGCTG	not reported	not reported	not reported	not reported	6.99605e-05	0.000120366	7.21539	4.66027	9.48651	9.44865	5.7929	7.96347	4.30902	8.3799	False	False	True	False	False	False
miR-195-5p__mir-195__0__+1__22M	hsa-mir-195	MI0000489	hsa-miR-195-5p	MIMAT0000461	0	1	7017666	7017687	chr17	-	0	TAGCAGCACAGAAATATTGGCA	TAGCAGCACAGAAATATTGGCA	not reported	not reported	not reported	not reported	2.31376e-10	6.8029e-10	34.7868	32.4295	11.9229	15.0436	20.4837	9.88859	30.2736	11.9652	False	False	False	True	False	False
miR-144-3p__mir-144__0__-1__19M	hsa-mir-144	MI0000460	hsa-miR-144-3p	MIMAT0000436	0	-1	28861549	28861567	chr17	-	0	TACAGTATAGATGATGTAC	TACAGTATAGATGATGTAC	not reported	not reported	not reported	not reported	6.94325e-13	3.03086e-12	14.1087	27.321	1.61501	1.76193	7.15059	1.10829	13.8022	1.14177	False	False	False	True	False	False
miR-505-3p__mir-505__+1__+2__23M	hsa-mir-505	MI0003190	hsa-miR-505-3p	MIMAT0002876	1	2	139924158	139924180	chrX	-	0	GTCAACACTTGCTGGTTTCCTCT	GTCAACACTTGCTGGTTTCCTCT	not reported	not reported	not reported	not reported	5.65183e-05	9.79243e-05	6.13346	1.03083	3.5722	3.94735	2.26629	2.9141	1.0127	3.14669	False	False	True	False	False	False
miR-183-5p__mir-183__+2__+2__22M	hsa-mir-183	MI0000273	hsa-miR-183-5p	MIMAT0000261	2	2	129774965	129774986	chr7	-	0	TGGCACTGGTAGAATTCACTGT	TGGCACTGGTAGAATTCACTGT	not reported	not reported	not reported	not reported	6.36724e-18	7.11395e-17	0.196039	0.04891	4.5243	2.76838	0.168723	2.05337	0.0438197	1.69793	False	False	True	False	False	False
miR-320a-3p__mir-320a__+2__+2__22M	hsa-mir-320a	MI0000542	hsa-miR-320a-3p	MIMAT0000510	2	2	22244973	22244994	chr8	-	0	AAGCTGGGTTGAGAGGGCGAAA	AAGCTGGGTTGAGAGGGCGAAA	not reported	not reported	not reported	not reported	0.000185781	0.000304433	1.54944	0.957081	2.44357	2.36916	1.16437	1.87983	0.920086	1.95645	False	False	True	False	False	False
miR-186-5p__mir-186__0__-2__20M	hsa-mir-186	MI0000483	hsa-miR-186-5p	MIMAT0000456	0	-2	71067683	71067702	chr1	-	0	CAAAGAATTCTCCTTTTGGG	CAAAGAATTCTCCTTTTGGG	not reported	not reported	not reported	not reported	4.7235e-07	9.80605e-07	12.2365	15.7844	22.8351	26.5949	9.96682	19.1517	13.9905	22.3262	False	False	True	False	False	False
miR-148b-3p__mir-148b__0__-1__21M	hsa-mir-148b	MI0000811	hsa-miR-148b-3p	MIMAT0000759	0	-1	54337278	54337298	chr12	+	0	TCAGTGCATCACAGAACTTTG	TCAGTGCATCACAGAACTTTG	not reported	not reported	not reported	not reported	0.00230645	0.00337054	75.8652	80.7371	117.689	131.407	72.2845	98.3074	79.1133	111.741	False	False	True	False	False	False
miR-205-5p__mir-205__0__+1__23M	hsa-mir-205	MI0000285	hsa-miR-205-5p	MIMAT0000266	0	1	209432166	209432188	chr1	+	0	TCCTTCATTCCACCGGAGTCTGT	TCCTTCATTCCACCGGAGTCTGT	not reported	not reported	not reported	not reported	0.00447581	0.00635193	20.0376	3.98343	114.862	95.2158	6.76073	17.3477	3.10032	21.6233	False	False	True	False	False	False
miR-181c-3p__mir-181c__+1__-5__16M	hsa-mir-181c	MI0000271	hsa-miR-181c-3p	MIMAT0004559	1	-5	13874764	13874779	chr19	+	0	ACCATCGACCGTTGAG	ACCATCGACCGTTGAG	not reported	not reported	not reported	not reported	0.0051153	0.00720402	1.74622	3.91854	2.79234	2.66057	1.41492	2.27841	3.25168	2.32128	False	False	False	False	True	False
miR-146b-3p__mir-146b__+1__0__21M	hsa-mir-146b	MI0003129	hsa-miR-146b-3p	MIMAT0004766	1	0	102436558	102436578	chr10	+	0	CCCTGTGGACTCAGTTCTGGT	CCCTGTGGACTCAGTTCTGGT	not reported	not reported	not reported	not reported	1.252e-11	4.30609e-11	3.86474	2.6371	1.60909	1.08916	3.1375	1.28679	2.38477	0.901892	False	False	False	True	False	False
miR-105-5p__mir-105-1__0__0__23M	hsa-mir-105-1	MI0000111	hsa-miR-105-5p	MIMAT0000102	0	0	152392265	152392287	chrX	-	0	TCAAATGCTCAGACTCCTGTGGT	TCAAATGCTCAGACTCCTGTGGT	not reported	not reported	not reported	not reported	2.83257e-05	5.00656e-05	0.0550892	0.0937583	13.9324	21.8941	0.0436021	1.15059	0.077223	2.43854	False	False	True	False	False	False
miR-106b-3p__mir-106b__0__-1__21M	hsa-mir-106b	MI0000734	hsa-miR-106b-3p	MIMAT0004672	0	-1	100094003	100094023	chr7	-	0	CCGCACTGTGGGTACTTGCTG	CCGCACTGTGGGTACTTGCTG	not reported	not reported	not reported	not reported	0.000100613	0.000170556	160.29	120.437	263.396	263.49	131.54	201.592	107.021	210.009	False	False	True	False	False	False
miR-9-5p__mir-9-1__+2__-1__20M	hsa-mir-9-1	MI0000466	hsa-miR-9-5p	MIMAT0000441	2	-1	156420393	156420412	chr1	-	0	TTTGGTTATCTAGCTGTATG	TTTGGTTATCTAGCTGTATG	not reported	not reported	not reported	not reported	1.75251e-14	1.09147e-13	0.131214	0.174921	9.28477	7.95739	0.0927833	2.22176	0.15784	2.19112	False	False	True	False	False	False
miR-148a-5p__mir-148a__0__0__22M	hsa-mir-148a	MI0000253	hsa-miR-148a-5p	MIMAT0004549	0	0	25949960	25949981	chr7	-	0	AAAGTTCTGAGACACTCCGACT	AAAGTTCTGAGACACTCCGACT	not reported	not reported	not reported	not reported	0.00264167	0.00383609	5.64697	6.49452	10.0996	11.4691	4.9592	7.83091	6.34474	8.72024	False	False	True	False	False	False
miR-199b-3p__mir-199b__0__-4__18M	hsa-mir-199b	MI0000282	hsa-miR-199b-3p	MIMAT0004563	0	-4	128244749	128244766	chr9	-	0	ACAGTAGTCTGCACATTG	ACAGTAGTCTGCACATTG	not reported	not reported	not reported	not reported	1.14075e-06	2.28833e-06	4.10496	5.23543	9.77461	9.32958	3.22741	7.13636	4.49865	5.0872	False	False	True	False	False	False
miR-34a-5p__mir-34a__0__-1__21M	hsa-mir-34a	MI0000268	hsa-miR-34a-5p	MIMAT0000255	0	-1	9151736	9151756	chr1	-	0	TGGCAGTGTCTTAGCTGGTTG	TGGCAGTGTCTTAGCTGGTTG	not reported	not reported	not reported	not reported	1.35127e-15	1.00446e-14	14.5458	15.7801	37.2899	39.9926	11.9216	31.9511	14.8885	33.7298	False	False	True	False	False	False
miR-21-3p__mir-21__+3__+1__19M	hsa-mir-21	MI0000077	hsa-miR-21-3p	MIMAT0004494	3	1	59841314	59841332	chr17	+	0	CACCAGTCGATGGGCTGTC	CACCAGTCGATGGGCTGTC	not reported	not reported	not reported	not reported	2.85705e-05	5.04258e-05	0.750483	0.554881	1.87209	1.02003	0.605174	1.32313	0.45971	0.773975	False	False	True	False	False	False
miR-187-3p__mir-187__0__+1__23M	hsa-mir-187	MI0000274	hsa-miR-187-3p	MIMAT0000262	0	1	35904834	35904856	chr18	-	0	TCGTGTCTTGTGTTGCAGCCGGA	TCGTGTCTTGTGTTGCAGCCGGA	not reported	not reported	not reported	not reported	0.00726931	0.00999699	1.01907	0.554225	3.66964	6.93257	0.710242	1.72362	0.501015	2.33044	False	False	True	False	False	False
miR-136-5p__mir-136__0__-2__21M	hsa-mir-136	MI0000475	hsa-miR-136-5p	MIMAT0000448	0	-2	100884716	100884736	chr14	+	0	ACTCCATTTGTTTTGATGATG	ACTCCATTTGTTTTGATGATG	not reported	not reported	not reported	not reported	4.08128e-15	2.81265e-14	1.24231	1.58235	10.9402	6.31501	1.02755	5.30991	1.44252	4.92303	False	False	True	False	False	False
let-7c-5p__let-7c__0__-4__18M	hsa-let-7c	MI0000064	hsa-let-7c-5p	MIMAT0000064	0	-4	16539838	16539855	chr21	+	0	TGAGGTAGTAGGTTGTAT	TGAGGTAGTAGGTTGTAT	not reported	not reported	not reported	not reported	4.0165e-08	9.34312e-08	1220.46	1316.29	795.997	996.433	1023.36	392.383	1288.6	548.5	False	False	False	True	False	False
miR-338-3p__mir-338__0__-2__20M	hsa-mir-338	MI0000814	hsa-miR-338-3p	MIMAT0000763	0	-2	81125889	81125908	chr17	-	0	TCCAGCATCAGTGATTTTGT	TCCAGCATCAGTGATTTTGT	not reported	not reported	not reported	not reported	2.71181e-10	7.89768e-10	50.976	54.6302	15.3819	8.83393	27.5732	7.48391	48.0803	5.36109	False	False	False	True	False	False
miR-30a-3p__mir-30a__0__-2__20M	hsa-mir-30a	MI0000088	hsa-miR-30a-3p	MIMAT0000088	0	-2	71403556	71403575	chr6	-	0	CTTTCAGTCGGATGTTTGCA	CTTTCAGTCGGATGTTTGCA	not reported	not reported	not reported	not reported	2.02395e-24	2.0365e-22	1557.29	1323.28	256.534	192.718	1312.62	177.836	1219.87	128.821	False	False	False	True	False	False
miR-143-3p__mir-143__+3__-1__17M	hsa-mir-143	MI0000459	hsa-miR-143-3p	MIMAT0000435	3	-1	149428981	149428997	chr5	+	0	GATGAAGCACTGTAGCT	GATGAAGCACTGTAGCT	not reported	not reported	not reported	not reported	1.16642e-07	2.57367e-07	127.208	99.4404	54.1851	38.0213	77.4105	27.9654	83.5591	18.2379	False	False	False	True	False	False
miR-100-5p__mir-100__0__-2__20M	hsa-mir-100	MI0000102	hsa-miR-100-5p	MIMAT0000098	0	-2	122152277	122152296	chr11	-	0	AACCCGTAGATCCGAACTTG	AACCCGTAGATCCGAACTTG	not reported	not reported	not reported	not reported	0.00588953	0.00824087	414.641	457.197	410.967	336.226	330.735	256.849	456.672	237.671	False	False	False	True	False	False
miR-151a-3p__mir-151a__-1__-2__20M	hsa-mir-151a	MI0000809	hsa-miR-151a-3p	MIMAT0000757	-1	-2	140732589	140732608	chr8	-	0	ACTAGACTGAAGCTCCTTGA	ACTAGACTGAAGCTCCTTGA	not reported	not reported	not reported	not reported	0.000260779	0.000420785	7.26784	7.6347	12.7691	13.1943	6.00664	10.3569	7.50997	11.0573	False	False	True	False	False	False
miR-450b-5p__mir-450b__0__-1__21M	hsa-mir-450b	MI0005531	hsa-miR-450b-5p	MIMAT0004909	0	-1	134540232	134540252	chrX	-	0	TTTTGCAATATGTTCCTGAAT	TTTTGCAATATGTTCCTGAAT	not reported	not reported	not reported	not reported	1.2297e-05	2.25792e-05	5.47113	7.6687	13.5603	21.1321	3.7509	9.46432	6.35057	12.0155	False	False	True	False	False	False
miR-30e-3p__mir-30e__-1__-1__22M	hsa-mir-30e	MI0000749	hsa-miR-30e-3p	MIMAT0000693	-1	-1	40754412	40754433	chr1	+	0	GCTTTCAGTCGGATGTTTACAG	GCTTTCAGTCGGATGTTTACAG	not reported	not reported	not reported	not reported	0.000112399	0.000189231	3.51139	2.80562	5.64112	4.80751	3.25555	4.78718	2.76861	4.31066	False	False	True	False	False	False
miR-455-3p__mir-455__0__-4__17M	hsa-mir-455	MI0003513	hsa-miR-455-3p	MIMAT0004784	0	-4	114209487	114209503	chr9	+	0	GCAGTCCATGGGCATAT	GCAGTCCATGGGCATAT	not reported	not reported	not reported	not reported	8.00988e-15	5.26425e-14	2.07183	0.431787	13.8938	17.6263	1.14947	7.05898	0.337846	9.15398	False	False	True	False	False	False
miR-34c-3p__mir-34c__0__0__22M	hsa-mir-34c	MI0000743	hsa-miR-34c-3p	MIMAT0004677	0	0	111513484	111513505	chr11	+	0	AATCACTAACCACACGGCCAGG	AATCACTAACCACACGGCCAGG	not reported	not reported	not reported	not reported	0.00352839	0.00505997	18.9992	8.89383	9.6976	13.0268	8.35132	3.59284	5.84567	5.07076	False	False	False	True	False	False
miR-99b-5p__mir-99b__0__-1__21M	hsa-mir-99b	MI0000746	hsa-miR-99b-5p	MIMAT0000689	0	-1	51692618	51692638	chr19	+	0	CACCCGTAGAACCGACCTTGC	CACCCGTAGAACCGACCTTGC	not reported	not reported	not reported	not reported	1.18538e-05	2.17871e-05	19955.2	9843.99	9234.17	8728.78	14101.3	8051.88	9646.96	8044.12	False	False	False	True	False	False
miR-200a-5p__mir-200a__+1__-1__20M	hsa-mir-200a	MI0000737	hsa-miR-200a-5p	MIMAT0001620	1	-1	1167879	1167898	chr1	+	0	ATCTTACCGGACAGTGCTGG	ATCTTACCGGACAGTGCTGG	not reported	not reported	not reported	not reported	5.38399e-12	1.96348e-11	1.51442	1.0915	4.1782	4.04328	1.15826	3.29513	1.05546	3.1362	False	False	True	False	False	False
miR-199b-3p__mir-199b__0__-2__20M	hsa-mir-199b	MI0000282	hsa-miR-199b-3p	MIMAT0004563	0	-2	128244747	128244766	chr9	-	0	ACAGTAGTCTGCACATTGGT	ACAGTAGTCTGCACATTGGT	not reported	not reported	not reported	not reported	0.0126011	0.0168518	148.415	188.492	245.56	236.782	117.17	191.596	181.513	196.401	False	False	True	False	False	False
miR-9-5p__mir-9-1__0__-7__16M	hsa-mir-9-1	MI0000466	hsa-miR-9-5p	MIMAT0000441	0	-7	156420399	156420414	chr1	-	0	TCTTTGGTTATCTAGC	TCTTTGGTTATCTAGC	not reported	not reported	not reported	not reported	7.57343e-17	7.14149e-16	0.0527166	0	19.4281	3.48147	0.0444657	1.99022	0	1.69892	False	False	True	False	False	False
miR-1307-3p__mir-1307__+1__+1__22M	hsa-mir-1307	MI0006444	hsa-miR-1307-3p	MIMAT0005951	1	1	103394300	103394321	chr10	-	0	CTCGGCGTGGCGTCGGTCGTGG	CTCGGCGTGGCGTCGGTCGTGG	not reported	not reported	not reported	not reported	8.1477e-07	1.65331e-06	280.144	115.369	246.745	302.831	125.907	199.113	108.905	246.329	False	False	True	False	False	False
miR-337-3p__mir-337__0__0__22M	hsa-mir-337	MI0000806	hsa-miR-337-3p	MIMAT0000754	0	0	100874553	100874574	chr14	+	0	CTCCTATATGATGCCTTTCTTC	CTCCTATATGATGCCTTTCTTC	not reported	not reported	not reported	not reported	9.55051e-07	1.92524e-06	2.60798	2.55014	7.34091	5.38237	2.20441	4.77679	2.43082	4.67518	False	False	True	False	False	False
let-7e-3p__let-7e__0__-1__21M	hsa-let-7e	MI0000066	hsa-let-7e-3p	MIMAT0004485	0	-1	51692838	51692858	chr19	+	0	CTATACGGCCTCCTAGCTTTC	CTATACGGCCTCCTAGCTTTC	not reported	not reported	not reported	not reported	9.20288e-06	1.70508e-05	6.53408	5.1034	4.08539	3.36471	5.61623	3.48	4.88891	3.06469	False	False	False	True	False	False
miR-340-3p__mir-340__0__-1__21M	hsa-mir-340	MI0000802	hsa-miR-340-3p	MIMAT0000750	0	-1	180015320	180015340	chr5	-	0	TCCGTCTCAGTTACTTTATAG	TCCGTCTCAGTTACTTTATAG	not reported	not reported	not reported	not reported	0.0024621	0.00358754	0.746771	1.2889	1.2905	1.48341	0.631304	1.10573	1.26431	1.21644	False	False	False	False	True	False
miR-338-3p__mir-338__+1__+1__22M	hsa-mir-338	MI0000814	hsa-miR-338-3p	MIMAT0000763	1	1	81125886	81125907	chr17	-	0	CCAGCATCAGTGATTTTGTTGA	CCAGCATCAGTGATTTTGTTGA	not reported	not reported	not reported	not reported	0.0289189	0.0369196	2.56271	3.07498	2.18415	1.71975	2.0696	1.46115	2.39171	1.37828	False	False	False	True	False	False
miR-183-5p__mir-183__-1__0__23M	hsa-mir-183	MI0000273	hsa-miR-183-5p	MIMAT0000261	-1	0	129774967	129774989	chr7	-	0	GTATGGCACTGGTAGAATTCACT	GTATGGCACTGGTAGAATTCACT	not reported	not reported	not reported	not reported	3.08541e-16	2.59133e-15	0.341855	0.411585	1.86396	2.24746	0.257231	1.42133	0.397262	1.8881	False	False	True	False	False	False
miR-374a-3p__mir-374a__0__-5__17M	hsa-mir-374a	MI0000782	hsa-miR-374a-3p	MIMAT0004688	0	-5	74287300	74287316	chrX	-	0	CTTATCAGATTGTATTG	CTTATCAGATTGTATTG	not reported	not reported	not reported	not reported	0.017848	0.0233435	5.91663	8.39552	7.77887	9.14196	3.98086	5.99301	7.21453	7.50966	True	False	False	False	False	False
miR-107__mir-107__0__-7__16M	hsa-mir-107	MI0000114	hsa-miR-107	MIMAT0000104	0	-7	89592763	89592778	chr10	-	0	AGCAGCATTGTACAGG	AGCAGCATTGTACAGG	not reported	not reported	not reported	not reported	0.00138716	0.00208073	121.246	166.87	146.15	90.8371	107.69	77.8103	150.425	68.0173	False	False	False	True	False	False
miR-133a-3p__mir-133a-1__+1__+1__22M	hsa-mir-133a-1	MI0000450	hsa-miR-133a-3p	MIMAT0000427	1	1	21825711	21825732	chr18	-	0	TTGGTCCCCTTCAACCAGCTGT	TTGGTCCCCTTCAACCAGCTGT	not reported	not reported	not reported	not reported	3.04864e-12	1.18195e-11	11.574	4.01712	2.11974	2.06652	6.09716	1.38541	3.82725	1.42592	False	False	False	True	False	False
miR-203a-3p__mir-203a__0__-6__16M	hsa-mir-203a	MI0000283	hsa-miR-203a-3p	MIMAT0000264	0	-6	104117469	104117484	chr14	+	0	GTGAAATGTTTAGGAC	GTGAAATGTTTAGGAC	not reported	not reported	not reported	not reported	5.74069e-05	9.94173e-05	4.35806	3.88539	19.3705	13.7075	3.36384	8.27112	3.58822	7.28568	False	False	True	False	False	False
miR-379-5p__mir-379__0__-5__16M	hsa-mir-379	MI0000787	hsa-miR-379-5p	MIMAT0000733	0	-5	101022071	101022086	chr14	+	0	TGGTAGACTATGGAAC	TGGTAGACTATGGAAC	not reported	not reported	not reported	not reported	0.0243465	0.031299	6.6279	6.40095	7.86325	3.13697	4.45349	3.27433	4.77544	2.28084	False	False	False	True	False	False
miR-1301-3p__mir-1301__0__-3__21M	hsa-mir-1301	MI0003815	hsa-miR-1301-3p	MIMAT0005797	0	-3	25328654	25328674	chr2	-	0	TTGCAGCTGCCTGGGAGTGAC	TTGCAGCTGCCTGGGAGTGAC	not reported	not reported	not reported	not reported	7.55871e-08	1.7108e-07	2.27432	0.761944	2.94356	3.51176	1.25946	2.19389	0.750024	2.72856	False	False	True	False	False	False
miR-140-3p__mir-140__+2__+3__22M	hsa-mir-140	MI0000456	hsa-miR-140-3p	MIMAT0004597	2	3	69933144	69933165	chr16	+	0	CCACAGGGTAGAACCACGGACA	CCACAGGGTAGAACCACGGACA	not reported	not reported	not reported	not reported	7.95666e-09	1.97417e-08	18.0587	19.6894	12.1824	10.4956	16.6816	10.5738	19.4142	9.62516	False	False	False	True	False	False
miR-21-5p__mir-21__+4__0__18M	hsa-mir-21	MI0000077	hsa-miR-21-5p	MIMAT0000076	4	0	59841277	59841294	chr17	+	0	TTATCAGACTGATGTTGA	TTATCAGACTGATGTTGA	not reported	not reported	not reported	not reported	3.33241e-23	1.49673e-21	3.32287	4.22359	66.4123	52.8215	2.45002	32.5799	3.95618	33.4063	False	False	True	False	False	False
miR-21-5p__mir-21__+2__-2__18M	hsa-mir-21	MI0000077	hsa-miR-21-5p	MIMAT0000076	2	-2	59841275	59841292	chr17	+	0	GCTTATCAGACTGATGTT	GCTTATCAGACTGATGTT	not reported	not reported	not reported	not reported	1.08886e-17	1.15362e-16	0.172026	0.208733	2.3482	1.59162	0.132931	1.66284	0.188261	1.04918	False	False	True	False	False	False
miR-93-5p__mir-93__0__-1__22M	hsa-mir-93	MI0000095	hsa-miR-93-5p	MIMAT0000093	0	-1	100093816	100093837	chr7	-	0	CAAAGTGCTGTTCGTGCAGGTA	CAAAGTGCTGTTCGTGCAGGTA	not reported	not reported	not reported	not reported	2.02846e-15	1.46646e-14	44.15	56.1575	180.43	206.207	41.8252	116.815	50.3575	150.091	False	False	True	False	False	False
miR-451a__mir-451a__0__0__22M	hsa-mir-451a	MI0001729	hsa-miR-451a	MIMAT0001631	0	0	28861403	28861424	chr17	-	0	AAACCGTTACCATTACTGAGTT	AAACCGTTACCATTACTGAGTT	not reported	not reported	not reported	not reported	1.39393e-11	4.75433e-11	533.102	1003.76	92.0541	138.042	233.265	44.7499	649.481	56.6194	False	False	False	True	False	False
miR-1307-3p__mir-1307__+1__0__21M	hsa-mir-1307	MI0006444	hsa-miR-1307-3p	MIMAT0005951	1	0	103394301	103394321	chr10	-	0	CTCGGCGTGGCGTCGGTCGTG	CTCGGCGTGGCGTCGGTCGTG	not reported	not reported	not reported	not reported	0.000572373	0.000893283	50.9666	23.6057	55.2266	71.4502	29.0543	39.6818	22.7681	49.6296	False	False	True	False	False	False
miR-324-5p__mir-324__0__0__22M	hsa-mir-324	MI0000813	hsa-miR-324-5p	MIMAT0000761	0	0	7223343	7223364	chr17	-	0	CGCATCCCCTAGGGCATTGGTG	CGCATCCCCTAGGGCATTGGTG	not reported	not reported	not reported	not reported	1.29522e-08	3.16676e-08	5.03538	3.68899	8.9562	10.2856	3.15245	7.10305	3.58714	7.96203	False	False	True	False	False	False
miR-664a-3p__mir-664a__0__-1__22M	hsa-mir-664a	MI0006442	hsa-miR-664a-3p	MIMAT0005949	0	-1	220200550	220200571	chr1	-	0	TATTCATTTATCCCCAGCCTAC	TATTCATTTATCCCCAGCCTAC	not reported	not reported	not reported	not reported	0.0161878	0.0213693	5.53194	8.0936	6.31562	7.3605	4.69332	5.37265	7.77164	6.33971	False	False	False	False	True	False
miR-148a-3p__mir-148a__0__-1__21M	hsa-mir-148a	MI0000253	hsa-miR-148a-3p	MIMAT0000243	0	-1	25949923	25949943	chr7	-	0	TCAGTGCACTACAGAACTTTG	TCAGTGCACTACAGAACTTTG	not reported	not reported	not reported	not reported	1.23516e-18	1.62644e-17	5537.38	7362.32	26099.8	30584	4197.38	19406.7	7154.3	22656.7	False	False	True	False	False	False
miR-423-3p__mir-423__-1__-1__23M	hsa-mir-423	MI0001445	hsa-miR-423-3p	MIMAT0001340	-1	-1	30117130	30117152	chr17	+	0	AAGCTCGGTCTGAGGCCCCTCAG	AAGCTCGGTCTGAGGCCCCTCAG	not reported	not reported	not reported	not reported	0.0338452	0.0428674	2.26851	0.448314	1.16662	1.17707	1.20472	1.02027	0.408967	1.05044	False	False	False	False	False	True
miR-143-3p__mir-143__0__-5__16M	hsa-mir-143	MI0000459	hsa-miR-143-3p	MIMAT0000435	0	-5	149428978	149428993	chr5	+	0	TGAGATGAAGCACTGT	TGAGATGAAGCACTGT	not reported	not reported	not reported	not reported	2.22625e-12	8.83552e-12	2730.11	2535.36	764.013	411.733	1530.87	381.402	2251.71	300.269	False	False	False	True	False	False
miR-452-5p__mir-452__0__0__22M	hsa-mir-452	MI0001733	hsa-miR-452-5p	MIMAT0001635	0	0	151959678	151959699	chrX	-	0	AACTGTTTGCAGAGGAAACTGA	AACTGTTTGCAGAGGAAACTGA	not reported	not reported	not reported	not reported	0.000112052	0.000188733	19.497	23.8372	13.2657	12.3354	12.0594	8.4942	23.4603	7.39534	False	False	False	True	False	False
miR-105-5p__mir-105-1__0__-1__22M	hsa-mir-105-1	MI0000111	hsa-miR-105-5p	MIMAT0000102	0	-1	152392266	152392287	chrX	-	0	TCAAATGCTCAGACTCCTGTGG	TCAAATGCTCAGACTCCTGTGG	not reported	not reported	not reported	not reported	2.17809e-05	3.89647e-05	0.325358	1.06902	33.6991	48.527	0.13471	1.79933	0.573561	3.94989	False	False	True	False	False	False
miR-183-5p__mir-183__+2__+1__21M	hsa-mir-183	MI0000273	hsa-miR-183-5p	MIMAT0000261	2	1	129774966	129774986	chr7	-	0	TGGCACTGGTAGAATTCACTG	TGGCACTGGTAGAATTCACTG	not reported	not reported	not reported	not reported	1.83236e-21	4.44467e-20	1.25048	0.690896	24.5661	11.2321	1.04335	9.39021	0.604314	5.9455	False	False	True	False	False	False
miR-20b-5p__mir-20b__0__0__23M	hsa-mir-20b	MI0001519	hsa-miR-20b-5p	MIMAT0001413	0	0	134169850	134169872	chrX	-	0	CAAAGTGCTCATAGTGCAGGTAG	CAAAGTGCTCATAGTGCAGGTAG	not reported	not reported	not reported	not reported	0.0167379	0.0220403	4.74051	8.12157	16.0197	23.6845	3.51555	6.97024	6.55836	8.90244	False	False	True	False	False	False
miR-140-3p__mir-140__+1__+2__22M	hsa-mir-140	MI0000456	hsa-miR-140-3p	MIMAT0004597	1	2	69933143	69933164	chr16	+	0	ACCACAGGGTAGAACCACGGAC	ACCACAGGGTAGAACCACGGAC	not reported	not reported	not reported	not reported	9.57163e-21	1.86723e-19	447.813	392.131	194.179	217.195	425.259	171.34	385.141	191.58	False	False	False	True	False	False
miR-532-5p__mir-532__0__-1__21M	hsa-mir-532	MI0003205	hsa-miR-532-5p	MIMAT0002888	0	-1	50003167	50003187	chrX	+	0	CATGCCTTGAGTGTAGGACCG	CATGCCTTGAGTGTAGGACCG	not reported	not reported	not reported	not reported	0.00711139	0.00980542	39.796	56.7977	63.783	64.1487	35.1521	52.5876	55.3095	52.5397	False	False	False	False	True	False
miR-197-3p__mir-197__0__-3__19M	hsa-mir-197	MI0000239	hsa-miR-197-3p	MIMAT0000227	0	-3	109598940	109598958	chr1	+	0	TTCACCACCTTCTCCACCC	TTCACCACCTTCTCCACCC	not reported	not reported	not reported	not reported	0.000405531	0.000642266	31.8764	4.86311	15.3991	17.7555	6.38987	8.80781	3.2184	10.7746	False	False	True	False	False	False
miR-223-3p__mir-223__0__+2__24M	hsa-mir-223	MI0000300	hsa-miR-223-3p	MIMAT0000280	0	2	66018937	66018960	chrX	+	0	TGTCAGTTTGTCAAATACCCCAAG	TGTCAGTTTGTCAAATACCCCAAG	not reported	not reported	not reported	not reported	0.00417912	0.00594461	3.68168	6.04067	2.77087	3.15238	2.77504	1.97923	5.19679	2.16151	False	False	False	True	False	False
miR-625-3p__mir-625__0__-2__20M	hsa-mir-625	MI0003639	hsa-miR-625-3p	MIMAT0004808	0	-2	65471153	65471172	chr14	+	0	GACTATAGAACTTTCCCCCT	GACTATAGAACTTTCCCCCT	not reported	not reported	not reported	not reported	9.97609e-13	4.20845e-12	16.6489	14.8822	50.0583	48.5757	13.6512	36.1892	13.2683	38.9028	False	False	True	False	False	False
miR-574-5p__mir-574__0__+1__24M	hsa-mir-574	MI0003581	hsa-miR-574-5p	MIMAT0004795	0	1	38868056	38868079	chr4	+	0	TGAGTGTGTGTGTGTGAGTGTGTG	TGAGTGTGTGTGTGTGAGTGTGTG	not reported	not reported	not reported	not reported	3.25161e-06	6.28997e-06	1.17551	0.41587	2.1216	2.39643	0.676099	1.5399	0.390979	1.46987	False	False	True	False	False	False
let-7d-5p__let-7d__+1__0__21M	hsa-let-7d	MI0000065	hsa-let-7d-5p	MIMAT0000065	1	0	94178842	94178862	chr9	+	0	GAGGTAGTAGGTTGCATAGTT	GAGGTAGTAGGTTGCATAGTT	not reported	not reported	not reported	not reported	8.31999e-12	2.93548e-11	0.831707	0.290292	2.76656	1.78119	0.590743	1.83423	0.265574	1.37392	False	False	True	False	False	False
miR-874-3p__mir-874__0__+1__23M	hsa-mir-874	MI0005532	hsa-miR-874-3p	MIMAT0004911	0	1	137647581	137647603	chr5	-	0	CTGCCCTGGCCCGAGGGACCGAC	CTGCCCTGGCCCGAGGGACCGAC	not reported	not reported	not reported	not reported	6.6695e-06	1.25206e-05	12.02	2.47617	6.93223	6.05882	3.56996	5.43943	2.28902	5.0476	False	False	True	False	False	False
miR-505-3p__mir-505__+1__0__21M	hsa-mir-505	MI0003190	hsa-miR-505-3p	MIMAT0002876	1	0	139924160	139924180	chrX	-	0	GTCAACACTTGCTGGTTTCCT	GTCAACACTTGCTGGTTTCCT	not reported	not reported	not reported	not reported	0.00107561	0.00162596	1.60133	1.48621	2.53983	2.73914	1.35347	2.16127	1.41808	2.32471	False	False	True	False	False	False
miR-205-5p__mir-205__0__-1__21M	hsa-mir-205	MI0000285	hsa-miR-205-5p	MIMAT0000266	0	-1	209432166	209432186	chr1	+	0	TCCTTCATTCCACCGGAGTCT	TCCTTCATTCCACCGGAGTCT	not reported	not reported	not reported	not reported	0.0133503	0.0177956	24.3873	6.25572	138.684	119.209	9.38038	21.5563	4.56054	26.4125	False	False	True	False	False	False
let-7a-3p__let-7a-1__0__-1__20M	hsa-let-7a-1	MI0000060	hsa-let-7a-3p	MIMAT0004481	0	-1	94176013	94176032	chr9	+	0	CTATACAATCTACTGTCTTT	CTATACAATCTACTGTCTTT	not reported	not reported	not reported	not reported	4.81512e-06	9.17019e-06	9.86067	9.17358	5.00693	5.65069	6.66592	4.19733	8.92216	4.59146	False	False	False	True	False	False
miR-30e-5p__mir-30e__+1__0__21M	hsa-mir-30e	MI0000749	hsa-miR-30e-5p	MIMAT0000692	1	0	40754372	40754392	chr1	+	0	GTAAACATCCTTGACTGGAAG	GTAAACATCCTTGACTGGAAG	not reported	not reported	not reported	not reported	2.00791e-23	1.07292e-21	15.4521	19.5112	100.599	99.4404	12.7887	75.9046	18.7957	76.0649	False	False	True	False	False	False
miR-454-3p__mir-454__0__-1__22M	hsa-mir-454	MI0003820	hsa-miR-454-3p	MIMAT0003885	0	-1	59137788	59137809	chr17	-	0	TAGTGCAATATTGCTTATAGGG	TAGTGCAATATTGCTTATAGGG	not reported	not reported	not reported	not reported	0.0077334	0.01058	1.02055	1.28037	1.52004	1.85458	0.861005	1.27792	1.17796	1.59786	False	False	True	False	False	False
miR-199b-3p__mir-199b__-1__0__23M	hsa-mir-199b	MI0000282	hsa-miR-199b-3p	MIMAT0004563	-1	0	128244745	128244767	chr9	-	0	TACAGTAGTCTGCACATTGGTTA	TACAGTAGTCTGCACATTGGTTA	not reported	not reported	not reported	not reported	2.9372e-07	6.22382e-07	4.7375	5.19824	11.0749	11.6161	3.97122	8.48737	4.94935	9.48624	False	False	True	False	False	False
miR-335-3p__mir-335__0__-2__20M	hsa-mir-335	MI0000816	hsa-miR-335-3p	MIMAT0004703	0	-2	130496162	130496181	chr7	+	0	TTTTTCATTATTGCTCCTGA	TTTTTCATTATTGCTCCTGA	not reported	not reported	not reported	not reported	0.000135164	0.000225599	3.66848	3.59833	10.2166	13.5707	2.69043	6.34533	3.19232	6.90245	False	False	True	False	False	False
let-7c-5p__let-7c__-1__-1__22M	hsa-let-7c	MI0000064	hsa-let-7c-5p	MIMAT0000064	-1	-1	16539837	16539858	chr21	+	0	TTGAGGTAGTAGGTTGTATGGT	TTGAGGTAGTAGGTTGTATGGT	not reported	not reported	not reported	not reported	8.59687e-13	3.66833e-12	7.16804	5.22211	3.04151	3.05041	6.23859	2.43183	4.99275	2.56984	False	False	False	True	False	False
miR-200c-3p__mir-200c__0__-6__17M	hsa-mir-200c	MI0000650	hsa-miR-200c-3p	MIMAT0000617	0	-6	6963742	6963758	chr12	+	0	TAATACTGCCGGGTAAT	TAATACTGCCGGGTAAT	not reported	not reported	not reported	not reported	1.34778e-05	2.46247e-05	17.8395	16.967	25.7396	26.6254	10.3111	18.8532	10.6396	19.038	False	False	True	False	False	False
miR-182-5p__mir-182__+5__+1__20M	hsa-mir-182	MI0000272	hsa-miR-182-5p	MIMAT0000259	5	1	129770446	129770465	chr7	-	0	CAATGGTAGAACTCACACTG	CAATGGTAGAACTCACACTG	not reported	not reported	not reported	not reported	9.03461e-15	5.86454e-14	0.801594	0.836134	6.69771	6.33179	0.650315	3.81792	0.729697	2.68226	False	False	True	False	False	False
miR-15b-5p__mir-15b__0__-6__16M	hsa-mir-15b	MI0000438	hsa-miR-15b-5p	MIMAT0000417	0	-6	160404607	160404622	chr3	+	0	TAGCAGCACATCATGG	TAGCAGCACATCATGG	not reported	not reported	not reported	not reported	2.03354e-07	4.37691e-07	7.33836	7.64164	4.2414	3.27159	6.02143	2.88038	6.80103	2.76385	False	False	False	True	False	False
miR-181a-5p__mir-181a-1__0__-7__16M	hsa-mir-181a-1	MI0000289	hsa-miR-181a-5p	MIMAT0000256	0	-7	198859115	198859130	chr1	-	0	AACATTCAACGCTGTC	AACATTCAACGCTGTC	not reported	not reported	not reported	not reported	0.000162346	0.000268297	99.7247	55.7771	51.0697	35.0178	59.0555	29.2067	48.5728	25.3709	False	False	False	True	False	False
miR-182-5p__mir-182__+6__+2__20M	hsa-mir-182	MI0000272	hsa-miR-182-5p	MIMAT0000259	6	2	129770445	129770464	chr7	-	0	AATGGTAGAACTCACACTGG	AATGGTAGAACTCACACTGG	not reported	not reported	not reported	not reported	2.01605e-15	1.46035e-14	0.154906	0.115343	1.98391	1.51516	0.110169	1.27387	0.103999	1.06927	False	False	True	False	False	False
miR-210-3p__mir-210__0__-6__16M	hsa-mir-210	MI0000286	hsa-miR-210-3p	MIMAT0000267	0	-6	568118	568133	chr11	-	0	CTGTGCGTGTGACAGC	CTGTGCGTGTGACAGC	not reported	not reported	not reported	not reported	1.69267e-16	1.48239e-15	1.35347	0.125011	16.851	5.93411	0.466144	4.80566	0.0977642	3.97996	False	False	True	False	False	False
miR-143-3p__mir-143__0__-3__18M	hsa-mir-143	MI0000459	hsa-miR-143-3p	MIMAT0000435	0	-3	149428978	149428995	chr5	+	0	TGAGATGAAGCACTGTAG	TGAGATGAAGCACTGTAG	not reported	not reported	not reported	not reported	4.42155e-12	1.64319e-11	17062.9	14590.3	4599.95	4136.21	9945.69	3244.59	13801.1	2715.74	False	False	False	True	False	False
miR-218-5p__mir-218-1__0__0__21M	hsa-mir-218-1	MI0000294	hsa-miR-218-5p	MIMAT0000275	0	0	20528299	20528319	chr4	+	0	TTGTGCTTGATCTAACCATGT	TTGTGCTTGATCTAACCATGT	not reported	not reported	not reported	not reported	1.41699e-11	4.81958e-11	72.3095	83.0101	22.3046	21.4429	39.8489	18.0606	80.2621	17.2967	False	False	False	True	False	False
let-7f-5p__let-7f-1__0__-2__20M	hsa-let-7f-1	MI0000067	hsa-let-7f-5p	MIMAT0000067	0	-2	94176353	94176372	chr9	+	0	TGAGGTAGTAGATTGTATAG	TGAGGTAGTAGATTGTATAG	not reported	not reported	not reported	not reported	8.9698e-12	3.14071e-11	4126.39	4863.76	1005.34	920.75	2004.96	676.261	4541.4	714.811	False	False	False	True	False	False
miR-181b-5p__mir-181b-1__0__-6__17M	hsa-mir-181b-1	MI0000270	hsa-miR-181b-5p	MIMAT0000257	0	-6	198858931	198858947	chr1	-	0	AACATTCATTGCTGTCG	AACATTCATTGCTGTCG	not reported	not reported	not reported	not reported	1.48968e-09	4.00326e-09	2.54785	3.17827	6.28382	5.72051	1.84617	4.84863	2.06365	4.81234	False	False	True	False	False	False
miR-125a-3p__mir-125a__0__-1__21M	hsa-mir-125a	MI0000469	hsa-miR-125a-3p	MIMAT0004602	0	-1	51693306	51693326	chr19	+	0	ACAGGTGAGGTTCTTGGGAGC	ACAGGTGAGGTTCTTGGGAGC	not reported	not reported	not reported	not reported	3.0101e-06	5.84733e-06	4.14641	2.93322	1.97758	2.17346	3.19922	1.63842	2.60102	1.87445	False	False	False	True	False	False
miR-21-5p__mir-21__+5__+5__22M	hsa-mir-21	MI0000077	hsa-miR-21-5p	MIMAT0000076	5	5	59841278	59841299	chr17	+	0	TATCAGACTGATGTTGACTGTT	TATCAGACTGATGTTGACTGTT	not reported	not reported	not reported	not reported	3.93545e-21	8.50229e-20	1.04736	1.37355	7.82484	6.18035	0.851084	5.7229	1.32864	4.80876	False	False	True	False	False	False
miR-19b-3p__mir-19b-1__0__-5__18M	hsa-mir-19b-1	MI0000074	hsa-miR-19b-3p	MIMAT0000074	0	-5	91351245	91351262	chr13	+	0	TGTGCAAATCCATGCAAA	TGTGCAAATCCATGCAAA	not reported	not reported	not reported	not reported	4.43722e-05	7.73524e-05	0.586469	1.03998	1.96654	3.26127	0.459285	1.14666	0.955629	1.95609	False	False	True	False	False	False
miR-181a-5p__mir-181a-1__+1__-1__21M	hsa-mir-181a-1	MI0000289	hsa-miR-181a-5p	MIMAT0000256	1	-1	198859109	198859129	chr1	-	0	ACATTCAACGCTGTCGGTGAG	ACATTCAACGCTGTCGGTGAG	not reported	not reported	not reported	not reported	0.0167177	0.0220251	21.1792	16.2789	18.7923	14.2119	17.8355	14.0724	14.8262	11.2514	False	False	False	True	False	False
miR-29c-3p__mir-29c__0__-5__17M	hsa-mir-29c	MI0000735	hsa-miR-29c-3p	MIMAT0000681	0	-5	207801870	207801886	chr1	-	0	TAGCACCATTTGAAATC	TAGCACCATTTGAAATC	not reported	not reported	not reported	not reported	2.67299e-12	1.03917e-11	20.8313	22.0564	56.9917	101.834	10.2226	39.9249	15.0717	70.0604	False	False	True	False	False	False
miR-505-3p__mir-505__0__+1__23M	hsa-mir-505	MI0003190	hsa-miR-505-3p	MIMAT0002876	0	1	139924159	139924181	chrX	-	0	CGTCAACACTTGCTGGTTTCCTC	CGTCAACACTTGCTGGTTTCCTC	not reported	not reported	not reported	not reported	6.76747e-06	1.26851e-05	3.81141	0.885722	2.23167	1.74766	1.28836	1.80413	0.814219	1.49941	False	False	True	False	False	False
miR-378a-3p__mir-378a__0__-2__20M	hsa-mir-378a	MI0000786	hsa-miR-378a-3p	MIMAT0000732	0	-2	149732867	149732886	chr5	+	0	ACTGGACTTGGAGTCAGAAG	ACTGGACTTGGAGTCAGAAG	not reported	not reported	not reported	not reported	1.17478e-13	6.07492e-13	168.638	200.136	70.2973	65.5803	129.899	55.0746	184.756	53.1829	False	False	False	True	False	False
miR-135b-5p__mir-135b__0__-2__21M	hsa-mir-135b	MI0000810	hsa-miR-135b-5p	MIMAT0000758	0	-2	205448363	205448383	chr1	-	0	TATGGCTTTTCATTCCTATGT	TATGGCTTTTCATTCCTATGT	not reported	not reported	not reported	not reported	2.10253e-13	1.02676e-12	1.18523	1.89567	7.12079	6.39769	0.925354	4.80515	1.76983	4.00192	False	False	True	False	False	False
miR-142-3p__mir-142__+3__-1__19M	hsa-mir-142	MI0000458	hsa-miR-142-3p	MIMAT0000434	3	-1	58331246	58331264	chr17	-	0	AGTGTTTCCTACTTTATGG	AGTGTTTCCTACTTTATGG	not reported	not reported	not reported	not reported	1.47432e-05	2.67774e-05	0.846258	1.05619	2.00904	1.73606	0.646912	1.55485	0.971171	1.36498	False	False	True	False	False	False
miR-10399-5p__mir-10399__+2__+3__22M	hsa-mir-10399	MI0033423	hsa-miR-10399-5p	MIMAT0041629	2	3	139044134	139044155	chr7	-	0	TTACAGATTGTCTCAGAGAAAA	TTACAGATTGTCTCAGAGAAAA	not reported	not reported	not reported	not reported	0.00813409	0.0110993	1.8233	1.59474	1.2308	1.07299	1.50942	0.999443	1.44776	0.886044	False	False	False	True	False	False
miR-142-3p__mir-142__0__0__23M	hsa-mir-142	MI0000458	hsa-miR-142-3p	MIMAT0000434	0	0	58331245	58331267	chr17	-	0	TGTAGTGTTTCCTACTTTATGGA	TGTAGTGTTTCCTACTTTATGGA	not reported	not reported	not reported	not reported	4.86867e-13	2.18912e-12	13.1971	16.9904	55.4469	60.8694	8.93625	36.8328	15.8146	45.6035	False	False	True	False	False	False
miR-151a-5p__mir-151a__-1__+1__23M	hsa-mir-151a	MI0000809	hsa-miR-151a-5p	MIMAT0004697	-1	1	140732622	140732644	chr8	-	0	CTCGAGGAGCTCACAGTCTAGTA	CTCGAGGAGCTCACAGTCTAGTA	not reported	not reported	not reported	not reported	2.70031e-18	3.27502e-17	2.08563	1.0499	13.7534	14.35	1.21269	9.01205	0.997693	11.2538	False	False	True	False	False	False
miR-10a-5p__mir-10a__0__-4__19M	hsa-mir-10a	MI0000266	hsa-miR-10a-5p	MIMAT0000253	0	-4	48579908	48579926	chr17	-	0	TACCCTGTAGATCCGAATT	TACCCTGTAGATCCGAATT	not reported	not reported	not reported	not reported	0.000527357	0.000825983	97.4336	77.3457	78.835	55.6345	62.2105	54.9375	70.7626	39.0495	False	False	False	True	False	False
miR-143-3p__mir-143__+4__-1__16M	hsa-mir-143	MI0000459	hsa-miR-143-3p	MIMAT0000435	4	-1	149428982	149428997	chr5	+	0	ATGAAGCACTGTAGCT	ATGAAGCACTGTAGCT	not reported	not reported	not reported	not reported	4.42553e-12	1.64319e-11	28.7589	22.4065	5.59944	3.62357	13.6629	3.00992	16.2115	1.59476	False	False	False	True	False	False
miR-375-3p__mir-375__0__-5__17M	hsa-mir-375	MI0000783	hsa-miR-375-3p	MIMAT0000728	0	-5	219001653	219001669	chr2	-	0	TTTGTTCGTTCGGCTCG	TTTGTTCGTTCGGCTCG	not reported	not reported	not reported	not reported	0.000176428	0.00029001	208.181	151.529	836.51	906.387	135.329	277.574	140.215	322.263	False	False	True	False	False	False
miR-200c-3p__mir-200c__-1__-1__23M	hsa-mir-200c	MI0000650	hsa-miR-200c-3p	MIMAT0000617	-1	-1	6963741	6963763	chr12	+	0	CTAATACTGCCGGGTAATGATGG	CTAATACTGCCGGGTAATGATGG	not reported	not reported	not reported	not reported	0.000120166	0.000201868	5.34529	4.26446	9.10834	11.7259	4.35521	6.98321	3.97206	7.72954	False	False	True	False	False	False
miR-361-5p__mir-361__0__-2__20M	hsa-mir-361	MI0000760	hsa-miR-361-5p	MIMAT0000703	0	-2	85903683	85903702	chrX	-	0	TTATCAGAATCTCCAGGGGT	TTATCAGAATCTCCAGGGGT	not reported	not reported	not reported	not reported	0.00666691	0.00923747	25.5435	25.6558	23.3966	20.6727	23.2166	20.4619	25.4857	18.3282	False	False	False	True	False	False
miR-30e-5p__mir-30e__+1__+1__22M	hsa-mir-30e	MI0000749	hsa-miR-30e-5p	MIMAT0000692	1	1	40754372	40754393	chr1	+	0	GTAAACATCCTTGACTGGAAGC	GTAAACATCCTTGACTGGAAGC	not reported	not reported	not reported	not reported	5.07005e-25	1.16833e-22	36.2643	40.4264	296.378	291.25	28.5945	232.975	38.7603	240.383	False	False	True	False	False	False
miR-3065-3p__mir-3065__0__-1__22M	hsa-mir-3065	MI0014228	hsa-miR-3065-3p	MIMAT0015378	0	-1	81125926	81125947	chr17	+	0	TCAGCACCAGGATATTGTTGGA	TCAGCACCAGGATATTGTTGGA	not reported	not reported	not reported	not reported	0.00656662	0.00912251	98.0761	114.638	108.324	83.3954	70.137	51.2583	111.697	42.8141	False	False	False	True	False	False
let-7f-5p__let-7f-1__0__-5__17M	hsa-let-7f-1	MI0000067	hsa-let-7f-5p	MIMAT0000067	0	-5	94176353	94176369	chr9	+	0	TGAGGTAGTAGATTGTA	TGAGGTAGTAGATTGTA	not reported	not reported	not reported	not reported	5.28942e-12	1.93473e-11	149.977	181.826	30.8766	36.7769	66.4308	19.5454	152.479	26.6897	False	False	False	True	False	False
miR-103a-3p__mir-103a-1__+2__+1__22M	hsa-mir-103a-1	MI0000109	hsa-miR-103a-3p	MIMAT0000101	2	1	168560903	168560924	chr5	-	0	CAGCATTGTACAGGGCTATGAA	CAGCATTGTACAGGGCTATGAA	not reported	not reported	not reported	not reported	2.41222e-07	5.16183e-07	2.00471	3.20406	4.28955	4.72463	1.67586	3.57089	2.95852	3.91133	False	False	True	False	False	False
miR-20a-5p__mir-20a__0__-1__22M	hsa-mir-20a	MI0000076	hsa-miR-20a-5p	MIMAT0000075	0	-1	91351072	91351093	chr13	+	0	TAAAGTGCTTATAGTGCAGGTA	TAAAGTGCTTATAGTGCAGGTA	not reported	not reported	not reported	not reported	3.87295e-09	9.90262e-09	3.61161	4.41587	10.9812	11.2186	2.80316	7.27335	4.15711	8.98448	False	False	True	False	False	False
miR-151b__mir-151b__-1__0__19M	hsa-mir-151b	MI0003772	hsa-miR-151b	MIMAT0010214	-1	0	100109438	100109456	chr14	-	0	CTCGAGGAGCTCACAGTCT	CTCGAGGAGCTCACAGTCT	not reported	not reported	not reported	not reported	9.07565e-17	8.44998e-16	0.393356	0.0885378	3.60457	4.24194	0.316917	2.37072	0.0815965	2.86544	False	False	True	False	False	False
miR-30e-5p__mir-30e__0__+2__24M	hsa-mir-30e	MI0000749	hsa-miR-30e-5p	MIMAT0000692	0	2	40754371	40754394	chr1	+	0	TGTAAACATCCTTGACTGGAAGCT	TGTAAACATCCTTGACTGGAAGCT	not reported	not reported	not reported	not reported	8.73624e-18	9.50163e-17	34.8137	50.542	301.536	347.212	26.3797	170.973	49.2009	221.241	False	False	True	False	False	False
miR-375-3p__mir-375__+2__-1__19M	hsa-mir-375	MI0000783	hsa-miR-375-3p	MIMAT0000728	2	-1	219001649	219001667	chr2	-	0	TGTTCGTTCGGCTCGCGTG	TGTTCGTTCGGCTCGCGTG	not reported	not reported	not reported	not reported	7.79998e-05	0.000133636	0.780189	0.697209	3.25687	3.30857	0.536914	1.48082	0.595608	1.83055	False	False	True	False	False	False
miR-93-5p__mir-93__0__-6__17M	hsa-mir-93	MI0000095	hsa-miR-93-5p	MIMAT0000093	0	-6	100093821	100093837	chr7	-	0	CAAAGTGCTGTTCGTGC	CAAAGTGCTGTTCGTGC	not reported	not reported	not reported	not reported	8.58552e-14	4.60769e-13	38.8369	61.4021	296.383	436.582	26.874	149.242	41.101	241.371	False	False	True	False	False	False
miR-378a-5p__mir-378a__0__-1__21M	hsa-mir-378a	MI0000786	hsa-miR-378a-5p	MIMAT0000731	0	-1	149732829	149732849	chr5	+	0	CTCCTGACTCCAGGTCCTGTG	CTCCTGACTCCAGGTCCTGTG	not reported	not reported	not reported	not reported	1.78585e-05	3.22293e-05	38.0422	28.2257	17.7913	16.5988	24.2407	14.2965	25.9817	13.2568	False	False	False	True	False	False
miR-21-5p__mir-21__0__+2__24M	hsa-mir-21	MI0000077	hsa-miR-21-5p	MIMAT0000076	0	2	59841273	59841296	chr17	+	0	TAGCTTATCAGACTGATGTTGACT	TAGCTTATCAGACTGATGTTGACT	not reported	not reported	not reported	not reported	3.5795e-24	3.11325e-22	136.268	159.366	1157.26	1130.33	66.8759	840.409	146.754	883.041	False	False	True	False	False	False
miR-210-3p__mir-210__0__-5__17M	hsa-mir-210	MI0000286	hsa-miR-210-3p	MIMAT0000267	0	-5	568117	568133	chr11	-	0	CTGTGCGTGTGACAGCG	CTGTGCGTGTGACAGCG	not reported	not reported	not reported	not reported	3.94329e-21	8.50229e-20	0.117812	0.0396277	6.37663	4.1606	0.0940367	3.12712	0.0361909	2.57208	False	False	True	False	False	False
miR-21-5p__mir-21__0__-2__20M	hsa-mir-21	MI0000077	hsa-miR-21-5p	MIMAT0000076	0	-2	59841273	59841292	chr17	+	0	TAGCTTATCAGACTGATGTT	TAGCTTATCAGACTGATGTT	not reported	not reported	not reported	not reported	1.35922e-21	3.43595e-20	1019.63	1194.76	3674.72	3248.56	632.545	3217.97	1179.21	2980.54	False	False	True	False	False	False
miR-181a-3p__mir-181a-1__0__-4__18M	hsa-mir-181a-1	MI0000289	hsa-miR-181a-3p	MIMAT0000270	0	-4	198859073	198859090	chr1	-	0	ACCATCGACCGTTGATTG	ACCATCGACCGTTGATTG	not reported	not reported	not reported	not reported	2.54204e-05	4.51688e-05	0.828561	1.06834	1.98564	2.53097	0.723647	1.5655	0.979142	1.63779	False	False	True	False	False	False
miR-23a-3p__mir-23a__+2__0__19M	hsa-mir-23a	MI0000079	hsa-miR-23a-3p	MIMAT0000078	2	0	13836595	13836613	chr19	-	0	CACATTGCCAGGGATTTCC	CACATTGCCAGGGATTTCC	not reported	not reported	not reported	not reported	0.0123365	0.0165098	0.827478	0.421463	2.2269	0.917353	0.677507	1.15543	0.369425	0.585814	False	False	True	False	False	False
miR-183-5p__mir-183__+1__-1__20M	hsa-mir-183	MI0000273	hsa-miR-183-5p	MIMAT0000261	1	-1	129774968	129774987	chr7	-	0	ATGGCACTGGTAGAATTCAC	ATGGCACTGGTAGAATTCAC	not reported	not reported	not reported	not reported	1.21085e-15	9.09244e-15	42.3605	36.2464	233.318	212.362	35.5663	140.849	31.655	142.476	False	False	True	False	False	False
miR-675-3p__mir-675__0__+1__21M	hsa-mir-675	MI0005416	hsa-miR-675-3p	MIMAT0006790	0	1	1996767	1996787	chr11	-	0	CTGTATGCCCTCACCGCTCAG	CTGTATGCCCTCACCGCTCAG	not reported	not reported	not reported	not reported	0.00186172	0.00274786	1.33544	0.303571	15.7292	14.7505	0.550436	1.15198	0.279126	1.60924	False	False	True	False	False	False
miR-140-3p__mir-140__+2__+1__20M	hsa-mir-140	MI0000456	hsa-miR-140-3p	MIMAT0004597	2	1	69933144	69933163	chr16	+	0	CCACAGGGTAGAACCACGGA	CCACAGGGTAGAACCACGGA	not reported	not reported	not reported	not reported	1.03905e-09	2.84408e-09	6.57263	7.97545	3.49395	3.02952	5.88918	2.88096	7.02035	2.62115	False	False	False	True	False	False
miR-26b-5p__mir-26b__0__+1__22M	hsa-mir-26b	MI0000084	hsa-miR-26b-5p	MIMAT0000083	0	1	218402657	218402678	chr2	+	0	TTCAAGTAATTCAGGATAGGTT	TTCAAGTAATTCAGGATAGGTT	not reported	not reported	not reported	not reported	0.0198308	0.0257996	273.478	314.233	384.761	455.153	233.342	324.735	311.874	382.563	False	False	True	False	False	False
let-7i-5p__let-7i__0__-5__17M	hsa-let-7i	MI0000434	hsa-let-7i-5p	MIMAT0000415	0	-5	62603691	62603707	chr12	+	0	TGAGGTAGTAGTTTGTG	TGAGGTAGTAGTTTGTG	not reported	not reported	not reported	not reported	0.000139646	0.000232554	5.79847	6.63755	3.25325	3.73454	4.05702	2.6599	5.70095	3.20716	False	False	False	True	False	False
miR-320a-3p__mir-320a__0__0__22M	hsa-mir-320a	MI0000542	hsa-miR-320a-3p	MIMAT0000510	0	0	22244975	22244996	chr8	-	0	AAAAGCTGGGTTGAGAGGGCGA	AAAAGCTGGGTTGAGAGGGCGA	not reported	not reported	not reported	not reported	9.47309e-08	2.11424e-07	275.727	206.628	169.177	162.124	249.001	144.929	199.925	148.748	False	False	False	True	False	False
miR-10a-5p__mir-10a__+1__-4__18M	hsa-mir-10a	MI0000266	hsa-miR-10a-5p	MIMAT0000253	1	-4	48579908	48579925	chr17	-	0	ACCCTGTAGATCCGAATT	ACCCTGTAGATCCGAATT	not reported	not reported	not reported	not reported	0.0149147	0.0197878	25.0265	19.02	25.7505	26.0308	15.5311	13.3754	17.3495	11.0619	False	False	False	True	False	False
miR-941__mir-941-1__0__-2__21M	hsa-mir-941-1	MI0005763	hsa-miR-941	MIMAT0004984	0	-2	63919495	63919515	chr20	+	0	CACCCGGCTGTGTGCACATGT	CACCCGGCTGTGTGCACATGT	not reported	not reported	not reported	not reported	0.00353345	0.00506526	1.74888	0.308931	1.20469	1.36684	0.923704	1.01236	0.282369	1.11388	False	False	True	False	False	False
miR-1307-3p__mir-1307__0__-1__21M	hsa-mir-1307	MI0006444	hsa-miR-1307-3p	MIMAT0005951	0	-1	103394302	103394322	chr10	-	0	ACTCGGCGTGGCGTCGGTCGT	ACTCGGCGTGGCGTCGGTCGT	not reported	not reported	not reported	not reported	1.91326e-06	3.78241e-06	15.298	5.37452	20.5716	21.8001	7.12287	13.9699	4.87891	16.2466	False	False	True	False	False	False
miR-320c__mir-320c-1__0__-3__17M	hsa-mir-320c-1	MI0003778	hsa-miR-320c	MIMAT0005793	0	-3	21683559	21683575	chr18	+	0	AAAAGCTGGGTTGAGAG	AAAAGCTGGGTTGAGAG	not reported	not reported	not reported	not reported	3.08018e-07	6.50809e-07	1.99503	1.59144	3.99052	4.35967	1.31574	2.91155	1.24018	3.3127	False	False	True	False	False	False
miR-196a-5p__mir-196a-1__0__-2__20M	hsa-mir-196a-1	MI0000238	hsa-miR-196a-5p	MIMAT0000226	0	-2	48632534	48632553	chr17	-	0	TAGGTAGTTTCATGTTGTTG	TAGGTAGTTTCATGTTGTTG	not reported	not reported	not reported	not reported	1.40277e-10	4.22895e-10	0.0745387	0.0937583	7.46018	5.57518	0.0580599	1.79585	0.077223	0.846026	False	False	True	False	False	False
miR-99b-3p__mir-99b__0__-6__16M	hsa-mir-99b	MI0000746	hsa-miR-99b-3p	MIMAT0004678	0	-6	51692656	51692671	chr19	+	0	CAAGCTCGTGTCTGTG	CAAGCTCGTGTCTGTG	not reported	not reported	not reported	not reported	0.0107492	0.0144854	2.69179	1.76538	1.69531	0.932879	1.79826	1.1433	1.40631	0.758396	False	False	False	True	False	False
miR-361-5p__mir-361__0__0__22M	hsa-mir-361	MI0000760	hsa-miR-361-5p	MIMAT0000703	0	0	85903681	85903702	chrX	-	0	TTATCAGAATCTCCAGGGGTAC	TTATCAGAATCTCCAGGGGTAC	not reported	not reported	not reported	not reported	0.000379112	0.000601975	115.91	143.522	92.6751	103.314	97.1948	82.5937	137.254	89.6079	False	False	False	True	False	False
miR-576-5p__mir-576__0__+1__23M	hsa-mir-576	MI0003583	hsa-miR-576-5p	MIMAT0003241	0	1	109488713	109488735	chr4	+	0	ATTCTAATTTCTCCACGTCTTTG	ATTCTAATTTCTCCACGTCTTTG	not reported	not reported	not reported	not reported	1.34181e-09	3.62703e-09	1.24366	1.00964	3.1731	3.9627	1.088	2.47268	0.966577	3.17101	False	False	True	False	False	False
miR-125b-5p__mir-125b-1__0__-1__21M	hsa-mir-125b-1	MI0000446	hsa-miR-125b-5p	MIMAT0000423	0	-1	122099810	122099830	chr11	-	0	TCCCTGAGACCCTAACTTGTG	TCCCTGAGACCCTAACTTGTG	not reported	not reported	not reported	not reported	0.000130846	0.000218988	174.951	125.815	123.534	104.557	152.273	97.7617	124.382	84.9539	False	False	False	True	False	False
miR-17-3p__mir-17__0__-3__19M	hsa-mir-17	MI0000071	hsa-miR-17-3p	MIMAT0000071	0	-3	91350655	91350673	chr13	+	0	ACTGCAGTGAAGGCACTTG	ACTGCAGTGAAGGCACTTG	not reported	not reported	not reported	not reported	1.4845e-07	3.23102e-07	1.32396	1.8585	3.53009	2.61787	1.09729	2.7562	1.66199	2.2363	False	False	True	False	False	False
miR-139-3p__mir-139__0__-1__22M	hsa-mir-139	MI0000261	hsa-miR-139-3p	MIMAT0004552	0	-1	72615067	72615088	chr11	-	0	TGGAGACGCGGCCCTGTTGGAG	TGGAGACGCGGCCCTGTTGGAG	not reported	not reported	not reported	not reported	1.3488e-23	8.28835e-22	23.6749	10.3674	2.07113	1.93218	13.9339	1.52392	9.96051	1.69162	False	False	False	True	False	False
miR-21-5p__mir-21__+1__+1__22M	hsa-mir-21	MI0000077	hsa-miR-21-5p	MIMAT0000076	1	1	59841274	59841295	chr17	+	0	AGCTTATCAGACTGATGTTGAC	AGCTTATCAGACTGATGTTGAC	not reported	not reported	not reported	not reported	1.65583e-18	2.11981e-17	3.47681	4.78082	15.8152	13.0291	2.42679	11.0084	4.02673	11.1112	False	False	True	False	False	False
miR-205-5p__mir-205__0__-5__17M	hsa-mir-205	MI0000285	hsa-miR-205-5p	MIMAT0000266	0	-5	209432166	209432182	chr1	+	0	TCCTTCATTCCACCGGA	TCCTTCATTCCACCGGA	not reported	not reported	not reported	not reported	0.00571881	0.00801721	0.54699	0.0786319	3.78903	1.95626	0.33644	1.09088	0.0728762	0.867244	False	False	True	False	False	False
miR-93-5p__mir-93__0__+1__24M	hsa-mir-93	MI0000095	hsa-miR-93-5p	MIMAT0000093	0	1	100093814	100093837	chr7	-	0	CAAAGTGCTGTTCGTGCAGGTAGT	CAAAGTGCTGTTCGTGCAGGTAGT	not reported	not reported	not reported	not reported	2.15494e-16	1.85637e-15	7.09901	7.45179	34.0983	40.0868	6.18671	22.2705	6.95255	28.7508	False	False	True	False	False	False
miR-511-5p__mir-511__0__+2__23M	hsa-mir-511	MI0003127	hsa-miR-511-5p	MIMAT0002808	0	2	17845122	17845144	chr10	+	0	GTGTCTTTTGCTCTGCAGTCAGT	GTGTCTTTTGCTCTGCAGTCAGT	not reported	not reported	not reported	not reported	0.00701647	0.00967816	1.23657	1.47542	2.21068	1.56877	0.977297	1.64027	1.15936	1.21963	False	False	True	False	False	False
miR-17-5p__mir-17__-1__-3__21M	hsa-mir-17	MI0000071	hsa-miR-17-5p	MIMAT0000070	-1	-3	91350617	91350637	chr13	+	0	TCAAAGTGCTTACAGTGCAGG	TCAAAGTGCTTACAGTGCAGG	not reported	not reported	not reported	not reported	3.28918e-07	6.92982e-07	0.49617	0.681759	1.35181	1.39391	0.413237	1.12217	0.570793	1.16174	False	False	True	False	False	False
miR-320a-3p__mir-320a__-1__0__23M	hsa-mir-320a	MI0000542	hsa-miR-320a-3p	MIMAT0000510	-1	0	22244975	22244997	chr8	-	0	GAAAAGCTGGGTTGAGAGGGCGA	GAAAAGCTGGGTTGAGAGGGCGA	not reported	not reported	not reported	not reported	1.30348e-07	2.85439e-07	3.44952	1.93812	1.63029	1.53049	2.79725	1.33209	1.85523	1.31766	False	False	False	True	False	False
miR-1307-3p__mir-1307__0__+1__23M	hsa-mir-1307	MI0006444	hsa-miR-1307-3p	MIMAT0005951	0	1	103394300	103394322	chr10	-	0	ACTCGGCGTGGCGTCGGTCGTGG	ACTCGGCGTGGCGTCGGTCGTGG	not reported	not reported	not reported	not reported	5.7897e-10	1.62085e-09	399.349	129.134	439.392	500.047	160.051	345.486	122.89	414.712	False	False	True	False	False	False
miR-155-5p__mir-155__0__-6__18M	hsa-mir-155	MI0000681	hsa-miR-155-5p	MIMAT0000646	0	-6	25573983	25574000	chr21	+	0	TTAATGCTAATCGTGATA	TTAATGCTAATCGTGATA	not reported	not reported	not reported	not reported	0.00290799	0.00420131	0.575246	0.613981	1.93672	1.69676	0.479447	1.13949	0.566077	1.03827	False	False	True	False	False	False
miR-421__mir-421__0__-1__22M	hsa-mir-421	MI0003685	hsa-miR-421	MIMAT0003339	0	-1	74218393	74218414	chrX	-	0	ATCAACAGACATTAATTGGGCG	ATCAACAGACATTAATTGGGCG	not reported	not reported	not reported	not reported	0.0260763	0.0333831	0.900292	1.45595	1.36128	1.84735	0.758025	1.06127	1.22817	1.46904	True	False	False	False	False	False
miR-552-5p__mir-552__-1__0__22M	hsa-mir-552	MI0003557	hsa-miR-552-5p	MIMAT0026615	-1	0	34669650	34669671	chr1	-	0	TGTTTAACCTTTTGCCTGTTGG	TGTTTAACCTTTTGCCTGTTGG	not reported	not reported	not reported	not reported	0.0131366	0.0175234	1.26227	1.69178	7.75812	1.90603	0.951259	1.38523	1.49652	0.568128	False	False	False	False	True	False
miR-182-5p__mir-182__+6__+1__19M	hsa-mir-182	MI0000272	hsa-miR-182-5p	MIMAT0000259	6	1	129770446	129770464	chr7	-	0	AATGGTAGAACTCACACTG	AATGGTAGAACTCACACTG	not reported	not reported	not reported	not reported	8.73844e-16	6.72622e-15	0.174832	0.152071	2.77318	1.82698	0.142724	1.65945	0.141409	1.38667	False	False	True	False	False	False
miR-141-5p__mir-141__0__-6__16M	hsa-mir-141	MI0000457	hsa-miR-141-5p	MIMAT0004598	0	-6	6964113	6964128	chr12	+	0	CATCTTCCAGTACAGT	CATCTTCCAGTACAGT	not reported	not reported	not reported	not reported	4.09061e-06	7.83077e-06	2.53602	2.12056	9.45606	7.65554	2.09844	5.28647	2.05647	5.1555	False	False	True	False	False	False
miR-30a-5p__mir-30a__0__-2__20M	hsa-mir-30a	MI0000088	hsa-miR-30a-5p	MIMAT0000087	0	-2	71403597	71403616	chr6	-	0	TGTAAACATCCTCGACTGGA	TGTAAACATCCTCGACTGGA	not reported	not reported	not reported	not reported	5.1905e-19	7.0358e-18	1636.94	1905.12	398.734	241.97	1240.04	251.876	1691.2	170.778	False	False	False	True	False	False
miR-187-3p__mir-187__0__0__22M	hsa-mir-187	MI0000274	hsa-miR-187-3p	MIMAT0000262	0	0	35904835	35904856	chr18	-	0	TCGTGTCTTGTGTTGCAGCCGG	TCGTGTCTTGTGTTGCAGCCGG	not reported	not reported	not reported	not reported	0.000696408	0.00107704	4.46979	3.36312	18.2574	33.9764	2.89489	7.15859	3.17066	10.28	False	False	True	False	False	False
miR-200a-3p__mir-200a__0__-5__17M	hsa-mir-200a	MI0000737	hsa-miR-200a-3p	MIMAT0000682	0	-5	1167916	1167932	chr1	+	0	TAACACTGTCTGGTAAC	TAACACTGTCTGGTAAC	not reported	not reported	not reported	not reported	3.83599e-13	1.76791e-12	0.384854	0.512077	2.55518	1.994	0.291948	1.78363	0.350542	1.44839	False	False	True	False	False	False
miR-183-5p__mir-183__+1__-3__18M	hsa-mir-183	MI0000273	hsa-miR-183-5p	MIMAT0000261	1	-3	129774970	129774987	chr7	-	0	ATGGCACTGGTAGAATTC	ATGGCACTGGTAGAATTC	not reported	not reported	not reported	not reported	2.02171e-19	2.99359e-18	10.6973	9.74887	203.874	216.682	8.63167	74.5802	8.62896	120.587	False	False	True	False	False	False
miR-22-3p__mir-22__0__-5__17M	hsa-mir-22	MI0000078	hsa-miR-22-3p	MIMAT0000077	0	-5	1713919	1713935	chr17	-	0	AAGCTGCCAGTTGAAGA	AAGCTGCCAGTTGAAGA	not reported	not reported	not reported	not reported	3.34445e-09	8.61705e-09	1286.98	1500.48	4981.86	6251.39	557.286	2366.69	917.041	3744.24	False	False	True	False	False	False
miR-151b__mir-151b__0__+1__19M	hsa-mir-151b	MI0003772	hsa-miR-151b	MIMAT0010214	0	1	100109437	100109455	chr14	-	0	TCGAGGAGCTCACAGTCTA	TCGAGGAGCTCACAGTCTA	not reported	not reported	not reported	not reported	0.023259	0.0299742	1.7466	1.98289	2.33476	2.49561	1.46182	2.03079	1.79341	2.25341	False	False	True	False	False	False
miR-145-5p__mir-145__0__0__23M	hsa-mir-145	MI0000461	hsa-miR-145-5p	MIMAT0000437	0	0	149430661	149430683	chr5	+	0	GTCCAGTTTTCCCAGGAATCCCT	GTCCAGTTTTCCCAGGAATCCCT	not reported	not reported	not reported	not reported	0.0220767	0.0285203	1545.17	378.395	435.688	415.887	628.429	318.296	368.167	324.954	False	False	False	True	False	False
miR-17-3p__mir-17__0__+1__23M	hsa-mir-17	MI0000071	hsa-miR-17-3p	MIMAT0000071	0	1	91350655	91350677	chr13	+	0	ACTGCAGTGAAGGCACTTGTAGC	ACTGCAGTGAAGGCACTTGTAGC	not reported	not reported	not reported	not reported	0.00211022	0.00309605	2.60803	3.58104	5.02254	5.07412	2.13884	3.80541	3.23785	4.1277	False	False	True	False	False	False
miR-30e-3p__mir-30e__+1__0__21M	hsa-mir-30e	MI0000749	hsa-miR-30e-3p	MIMAT0000693	1	0	40754414	40754434	chr1	+	0	TTTCAGTCGGATGTTTACAGC	TTTCAGTCGGATGTTTACAGC	not reported	not reported	not reported	not reported	6.66327e-10	1.85275e-09	82.8879	79.9379	43.0123	37.4465	66.0661	37.1102	77.1377	33.5735	False	False	False	True	False	False
miR-505-5p__mir-505__0__+1__23M	hsa-mir-505	MI0003190	hsa-miR-505-5p	MIMAT0004776	0	1	139924195	139924217	chrX	-	0	GGGAGCCAGGAAGTATTGATGTT	GGGAGCCAGGAAGTATTGATGTT	not reported	not reported	not reported	not reported	2.92972e-09	7.57495e-09	1.59096	0.429299	2.9162	3.00009	0.836049	2.29118	0.383161	2.33334	False	False	True	False	False	False
miR-375-3p__mir-375__-1__-3__20M	hsa-mir-375	MI0000783	hsa-miR-375-3p	MIMAT0000728	-1	-3	219001651	219001670	chr2	-	0	TTTTGTTCGTTCGGCTCGCG	TTTTGTTCGTTCGGCTCGCG	not reported	not reported	not reported	not reported	0.000120289	0.000201868	36.9038	26.0293	201.818	227.603	24.2513	55.7733	25.6931	57.876	False	False	True	False	False	False
miR-183-5p__mir-183__0__-4__18M	hsa-mir-183	MI0000273	hsa-miR-183-5p	MIMAT0000261	0	-4	129774971	129774988	chr7	-	0	TATGGCACTGGTAGAATT	TATGGCACTGGTAGAATT	not reported	not reported	not reported	not reported	1.65948e-11	5.6133e-11	14.0597	15.5105	70.0009	67.5825	10.9292	37.8145	13.0993	42.6591	False	False	True	False	False	False
miR-141-3p__mir-141__0__-4__18M	hsa-mir-141	MI0000457	hsa-miR-141-3p	MIMAT0000432	0	-4	6964155	6964172	chr12	+	0	TAACACTGTCTGGTAAAG	TAACACTGTCTGGTAAAG	not reported	not reported	not reported	not reported	3.1578e-08	7.40166e-08	13.9898	14.08	45.835	59.096	9.24824	27.8185	13.2133	34.6694	False	False	True	False	False	False
miR-23b-3p__mir-23b__-1__-2__22M	hsa-mir-23b	MI0000439	hsa-miR-23b-3p	MIMAT0000418	-1	-2	95085264	95085285	chr9	+	0	AATCACATTGCCAGGGATTACC	AATCACATTGCCAGGGATTACC	not reported	not reported	not reported	not reported	0.00143379	0.0021437	0.739744	0.827926	1.17261	1.45409	0.657459	1.01678	0.75606	1.27624	False	False	True	False	False	False
miR-22-3p__mir-22__-1__-1__22M	hsa-mir-22	MI0000078	hsa-miR-22-3p	MIMAT0000077	-1	-1	1713915	1713936	chr17	-	0	AAAGCTGCCAGTTGAAGAACTG	AAAGCTGCCAGTTGAAGAACTG	not reported	not reported	not reported	not reported	0.00175565	0.00260172	0.765785	1.36883	1.54838	1.41873	0.632321	1.25125	1.2281	1.26108	False	False	True	False	False	False
miR-181b-5p__mir-181b-1__-1__-1__23M	hsa-mir-181b-1	MI0000270	hsa-miR-181b-5p	MIMAT0000257	-1	-1	198858926	198858948	chr1	-	0	CAACATTCATTGCTGTCGGTGGG	CAACATTCATTGCTGTCGGTGGG	not reported	not reported	not reported	not reported	0.000651406	0.00101211	1.23325	1.17893	2.32527	2.67336	1.02874	1.79889	1.14672	2.03834	False	False	True	False	False	False
miR-143-3p__mir-143__+5__0__16M	hsa-mir-143	MI0000459	hsa-miR-143-3p	MIMAT0000435	5	0	149428983	149428998	chr5	+	0	TGAAGCACTGTAGCTC	TGAAGCACTGTAGCTC	not reported	not reported	not reported	not reported	6.58363e-17	6.25614e-16	842.625	674.424	122.128	78.3732	367.288	38.0757	507.833	15.5864	False	False	False	True	False	False
miR-30a-5p__mir-30a__0__-5__17M	hsa-mir-30a	MI0000088	hsa-miR-30a-5p	MIMAT0000087	0	-5	71403600	71403616	chr6	-	0	TGTAAACATCCTCGACT	TGTAAACATCCTCGACT	not reported	not reported	not reported	not reported	1.65257e-05	2.9897e-05	112.762	146.312	38.8951	26.5647	44.1865	20.75	75.458	18.1725	False	False	False	True	False	False
miR-151a-3p__mir-151a__0__-3__18M	hsa-mir-151a	MI0000809	hsa-miR-151a-3p	MIMAT0000757	0	-3	140732590	140732607	chr8	-	0	CTAGACTGAAGCTCCTTG	CTAGACTGAAGCTCCTTG	not reported	not reported	not reported	not reported	0.00666625	0.00923747	66.5769	88.1076	150.756	175.965	43.1639	74.5282	85.4634	106.041	True	False	False	False	False	False
miR-181a-5p__mir-181a-1__0__-2__21M	hsa-mir-181a-1	MI0000289	hsa-miR-181a-5p	MIMAT0000256	0	-2	198859110	198859130	chr1	-	0	AACATTCAACGCTGTCGGTGA	AACATTCAACGCTGTCGGTGA	not reported	not reported	not reported	not reported	8.44275e-14	4.55094e-13	505.222	461.228	252.526	250.732	455.108	202.934	452.242	219.92	False	False	False	True	False	False
miR-362-5p__mir-362__0__0__24M	hsa-mir-362	MI0000762	hsa-miR-362-5p	MIMAT0000705	0	0	50008968	50008991	chrX	+	0	AATCCTTGGAACCTAGGTGTGAGT	AATCCTTGGAACCTAGGTGTGAGT	not reported	not reported	not reported	not reported	0.00264698	0.00384229	1.34708	1.24107	2.95646	3.43816	1.03067	1.9792	1.02037	2.19593	False	False	True	False	False	False
miR-99b-3p__mir-99b__0__0__22M	hsa-mir-99b	MI0000746	hsa-miR-99b-3p	MIMAT0004678	0	0	51692656	51692677	chr19	+	0	CAAGCTCGTGTCTGTGGGTCCG	CAAGCTCGTGTCTGTGGGTCCG	not reported	not reported	not reported	not reported	0.0307994	0.0391982	27.6608	15.4407	25.3111	25.4133	19.832	20.9767	14.6655	22.1454	False	False	True	False	False	False
miR-223-3p__mir-223__0__-5__17M	hsa-mir-223	MI0000300	hsa-miR-223-3p	MIMAT0000280	0	-5	66018937	66018953	chrX	+	0	TGTCAGTTTGTCAAATA	TGTCAGTTTGTCAAATA	not reported	not reported	not reported	not reported	0.0372794	0.046975	2.43571	2.32307	1.6066	2.38029	1.29291	1.08434	1.7969	1.58127	False	False	False	True	False	False
miR-574-3p__mir-574__0__-3__19M	hsa-mir-574	MI0003581	hsa-miR-574-3p	MIMAT0003239	0	-3	38868092	38868110	chr4	+	0	CACGCTCATGCACACACCC	CACGCTCATGCACACACCC	not reported	not reported	not reported	not reported	0.0159187	0.0210366	7.16368	1.64489	6.83139	6.23235	3.58839	4.48822	1.38509	4.39437	False	False	True	False	False	False
miR-140-3p__mir-140__0__+1__22M	hsa-mir-140	MI0000456	hsa-miR-140-3p	MIMAT0004597	0	1	69933142	69933163	chr16	+	0	TACCACAGGGTAGAACCACGGA	TACCACAGGGTAGAACCACGGA	not reported	not reported	not reported	not reported	3.906e-25	9.60095e-23	322.404	338.875	100.463	115.141	301.417	86.6813	328.606	100.946	False	False	False	True	False	False
miR-9-5p__mir-9-1__0__-6__17M	hsa-mir-9-1	MI0000466	hsa-miR-9-5p	MIMAT0000441	0	-6	156420398	156420414	chr1	-	0	TCTTTGGTTATCTAGCT	TCTTTGGTTATCTAGCT	not reported	not reported	not reported	not reported	1.60857e-11	5.45111e-11	0.253491	0.0708805	6.21836	4.40822	0.182333	1.79762	0.0663008	1.92515	False	False	True	False	False	False
miR-223-3p__mir-223__0__+1__23M	hsa-mir-223	MI0000300	hsa-miR-223-3p	MIMAT0000280	0	1	66018937	66018959	chrX	+	0	TGTCAGTTTGTCAAATACCCCAA	TGTCAGTTTGTCAAATACCCCAA	not reported	not reported	not reported	not reported	9.94947e-08	2.21788e-07	133.218	257.324	55.8643	69.0905	81.8065	36.1841	170.539	40.8976	False	False	False	True	False	False
miR-589-5p__mir-589__0__0__22M	hsa-mir-589	MI0003599	hsa-miR-589-5p	MIMAT0004799	0	0	5495873	5495894	chr7	-	0	TGAGAACCACGTCTGCTCTGAG	TGAGAACCACGTCTGCTCTGAG	not reported	not reported	not reported	not reported	5.41783e-09	1.36445e-08	7.50248	3.31328	10.1972	12.2523	4.72328	8.74002	3.03045	9.78624	False	False	True	False	False	False
let-7f-5p__let-7f-1__0__-4__18M	hsa-let-7f-1	MI0000067	hsa-let-7f-5p	MIMAT0000067	0	-4	94176353	94176370	chr9	+	0	TGAGGTAGTAGATTGTAT	TGAGGTAGTAGATTGTAT	not reported	not reported	not reported	not reported	9.20434e-07	1.85749e-06	456.692	567.521	269.38	323.155	217.068	108.373	539.647	170.502	False	False	False	True	False	False
let-7g-3p__let-7g__0__-1__20M	hsa-let-7g	MI0000433	hsa-let-7g-3p	MIMAT0004584	0	-1	52268281	52268300	chr3	-	0	CTGTACAGGCCACTGCCTTG	CTGTACAGGCCACTGCCTTG	not reported	not reported	not reported	not reported	4.66879e-09	1.18389e-08	1.24982	1.55015	3.68844	4.02736	0.986921	2.73888	1.03817	3.11431	False	False	True	False	False	False
miR-30a-3p__mir-30a__+1__0__21M	hsa-mir-30a	MI0000088	hsa-miR-30a-3p	MIMAT0000088	1	0	71403554	71403574	chr6	-	0	TTTCAGTCGGATGTTTGCAGC	TTTCAGTCGGATGTTTGCAGC	not reported	not reported	not reported	not reported	5.84847e-24	4.58793e-22	2453.09	2419	359.012	275.204	1962.37	256.199	2269.74	197.201	False	False	False	True	False	False
miR-30c-2-3p__mir-30c-2__0__-5__17M	hsa-mir-30c-2	MI0000254	hsa-miR-30c-2-3p	MIMAT0004550	0	-5	71376969	71376985	chr6	-	0	CTGGGAGAAGGCTGTTT	CTGGGAGAAGGCTGTTT	not reported	not reported	not reported	not reported	1.26303e-13	6.50392e-13	13.1682	13.3132	4.17717	4.90085	10.8989	2.68004	9.77112	2.8702	False	False	False	True	False	False
miR-186-5p__mir-186__0__+1__23M	hsa-mir-186	MI0000483	hsa-miR-186-5p	MIMAT0000456	0	1	71067680	71067702	chr1	-	0	CAAAGAATTCTCCTTTTGGGCTT	CAAAGAATTCTCCTTTTGGGCTT	not reported	not reported	not reported	not reported	6.14518e-11	1.93157e-10	23.3296	26.6117	52.322	62.1393	21.9461	42.3661	25.9183	51.0443	False	False	True	False	False	False
miR-29c-3p__mir-29c__-1__-1__22M	hsa-mir-29c	MI0000735	hsa-miR-29c-3p	MIMAT0000681	-1	-1	207801866	207801887	chr1	-	0	CTAGCACCATTTGAAATCGGTT	CTAGCACCATTTGAAATCGGTT	not reported	not reported	not reported	not reported	0.0175074	0.0229388	4.53896	6.63954	5.42332	6.69886	3.36637	4.59155	6.26544	5.79737	False	False	False	False	True	False
miR-22-3p__mir-22__0__+1__23M	hsa-mir-22	MI0000078	hsa-miR-22-3p	MIMAT0000077	0	1	1713913	1713935	chr17	-	0	AAGCTGCCAGTTGAAGAACTGTT	AAGCTGCCAGTTGAAGAACTGTT	not reported	not reported	not reported	not reported	2.3354e-12	9.23886e-12	273.08	365.008	584.957	677.952	237.881	501.459	360.272	601.533	False	False	True	False	False	False
miR-181b-3p__mir-181b-1__0__0__21M	hsa-mir-181b-1	MI0000270	hsa-miR-181b-3p	MIMAT0022692	0	0	198858887	198858907	chr1	-	0	CTCACTGAACAATGAATGCAA	CTCACTGAACAATGAATGCAA	not reported	not reported	not reported	not reported	1.8525e-13	9.19267e-13	1.28762	2.07664	5.42075	4.43419	1.04151	3.96795	1.71387	3.84188	False	False	True	False	False	False
miR-584-5p__mir-584__0__0__22M	hsa-mir-584	MI0003591	hsa-miR-584-5p	MIMAT0003249	0	0	149062373	149062394	chr5	-	0	TTATGGTTTGCCTGGGACTGAG	TTATGGTTTGCCTGGGACTGAG	not reported	not reported	not reported	not reported	3.27345e-10	9.45122e-10	6.10302	5.37339	3.81162	1.92609	5.11821	2.2144	4.94751	1.47839	False	False	False	True	False	False
miR-25-3p__mir-25__0__-5__17M	hsa-mir-25	MI0000082	hsa-miR-25-3p	MIMAT0000081	0	-5	100093576	100093592	chr7	-	0	CATTGCACTTGTCTCGG	CATTGCACTTGTCTCGG	not reported	not reported	not reported	not reported	0.000290504	0.000467112	130.411	222.754	194.496	211.929	99.4361	149.111	189.533	185.233	False	False	False	False	True	False
miR-378c__mir-378c__0__-9__16M	hsa-mir-378c	MI0015825	hsa-miR-378c	MIMAT0016847	0	-9	130962643	130962658	chr10	-	0	ACTGGACTTGGAGTCA	ACTGGACTTGGAGTCA	not reported	not reported	not reported	not reported	6.4971e-18	7.2371e-17	56.395	41.0031	9.4673	7.39646	29.7857	5.27433	36.9056	4.81762	False	False	False	True	False	False
miR-708-3p__mir-708__+1__0__21M	hsa-mir-708	MI0005543	hsa-miR-708-3p	MIMAT0004927	1	0	79402032	79402052	chr11	-	0	AACTAGACTGTGAGCTTCTAG	AACTAGACTGTGAGCTTCTAG	not reported	not reported	not reported	not reported	1.51623e-18	1.95903e-17	1.00044	0.866803	5.87699	6.71732	0.795452	4.30801	0.785242	5.24534	False	False	True	False	False	False
miR-21-5p__mir-21__0__+3__25M	hsa-mir-21	MI0000077	hsa-miR-21-5p	MIMAT0000076	0	3	59841273	59841297	chr17	+	0	TAGCTTATCAGACTGATGTTGACTG	TAGCTTATCAGACTGATGTTGACTG	not reported	not reported	not reported	not reported	5.13902e-19	6.99173e-18	0.155206	0.267414	2.53059	2.51818	0.13281	1.75094	0.243584	1.74168	False	False	True	False	False	False
miR-181c-5p__mir-181c__0__-2__20M	hsa-mir-181c	MI0000271	hsa-miR-181c-5p	MIMAT0000258	0	-2	13874725	13874744	chr19	+	0	AACATTCAACCTGTCGGTGA	AACATTCAACCTGTCGGTGA	not reported	not reported	not reported	not reported	1.14085e-09	3.10889e-09	2.62981	3.15182	1.34425	1.44752	2.33895	1.07486	2.8375	1.14291	False	False	False	True	False	False
miR-125a-5p__mir-125a__0__-5__19M	hsa-mir-125a	MI0000469	hsa-miR-125a-5p	MIMAT0000443	0	-5	51693268	51693286	chr19	+	0	TCCCTGAGACCCTTTAACC	TCCCTGAGACCCTTTAACC	not reported	not reported	not reported	not reported	2.36419e-09	6.16027e-09	9.87919	5.02805	3.92842	3.62914	7.66613	3.41686	4.85066	3.12961	False	False	False	True	False	False
miR-29b-2-5p__mir-29b-2__0__0__22M	hsa-mir-29b-2	MI0000107	hsa-miR-29b-2-5p	MIMAT0004515	0	0	207802492	207802513	chr1	-	0	CTGGTTTCACATGGTGGCTTAG	CTGGTTTCACATGGTGGCTTAG	not reported	not reported	not reported	not reported	0.016747	0.0220443	8.839	4.99611	12.8119	11.5672	6.84086	9.18266	4.91551	8.96873	False	False	True	False	False	False
miR-423-3p__mir-423__0__-1__22M	hsa-mir-423	MI0001445	hsa-miR-423-3p	MIMAT0001340	0	-1	30117131	30117152	chr17	+	0	AGCTCGGTCTGAGGCCCCTCAG	AGCTCGGTCTGAGGCCCCTCAG	not reported	not reported	not reported	not reported	0.000357459	0.000569063	15.8452	6.00105	11.2088	10.8155	8.72991	9.71352	5.783	9.82556	False	False	True	False	False	False
miR-181b-5p__mir-181b-1__-1__-3__21M	hsa-mir-181b-1	MI0000270	hsa-miR-181b-5p	MIMAT0000257	-1	-3	198858928	198858948	chr1	-	0	CAACATTCATTGCTGTCGGTG	CAACATTCATTGCTGTCGGTG	not reported	not reported	not reported	not reported	0.00268613	0.00389299	0.938887	0.797277	1.71372	1.88538	0.832524	1.37426	0.737459	1.55883	False	False	True	False	False	False
miR-183-5p__mir-183__+1__-2__19M	hsa-mir-183	MI0000273	hsa-miR-183-5p	MIMAT0000261	1	-2	129774969	129774987	chr7	-	0	ATGGCACTGGTAGAATTCA	ATGGCACTGGTAGAATTCA	not reported	not reported	not reported	not reported	2.6792e-17	2.67702e-16	52.9754	45.9918	288.83	272.378	40.8657	186.669	41.5985	176.579	False	False	True	False	False	False
miR-27b-3p__mir-27b__-1__-1__21M	hsa-mir-27b	MI0000440	hsa-miR-27b-3p	MIMAT0000419	-1	-1	95085504	95085524	chr9	+	0	GTTCACAGTGGCTAAGTTCTG	GTTCACAGTGGCTAAGTTCTG	not reported	not reported	not reported	not reported	0.000508923	0.000798467	2.79977	3.22792	4.58462	5.22662	2.39943	3.8595	3.11105	4.41726	False	False	True	False	False	False
miR-1306-5p__mir-1306__0__0__22M	hsa-mir-1306	MI0006443	hsa-miR-1306-5p	MIMAT0022726	0	0	20086072	20086093	chr22	+	0	CCACCTCCCCTGCAAACGTCCA	CCACCTCCCCTGCAAACGTCCA	not reported	not reported	not reported	not reported	3.20634e-07	6.76689e-07	7.35812	0.539127	2.39443	2.5859	1.39226	1.82496	0.511825	1.96054	False	False	True	False	False	False
miR-4677-3p__mir-4677__0__-1__21M	hsa-mir-4677	MI0017308	hsa-miR-4677-3p	MIMAT0019761	0	-1	243346225	243346245	chr1	+	0	TCTGTGAGACCAAAGAACTAC	TCTGTGAGACCAAAGAACTAC	not reported	not reported	not reported	not reported	0.000245733	0.0003979	0.841761	1.30175	1.39022	1.83348	0.746979	1.1746	1.25325	1.59137	True	False	False	False	False	False
miR-1247-3p__mir-1247__+3__0__21M	hsa-mir-1247	MI0006382	hsa-miR-1247-3p	MIMAT0022721	3	0	101560326	101560346	chr14	-	0	CGGGAACGTCGAGACTGGAGC	CGGGAACGTCGAGACTGGAGC	not reported	not reported	not reported	not reported	5.21776e-17	5.02294e-16	51.3418	17.6818	10.9869	7.81346	33.0254	5.0624	16.5706	3.28343	False	False	False	True	False	False
miR-28-5p__mir-28__0__-1__21M	hsa-mir-28	MI0000086	hsa-miR-28-5p	MIMAT0000085	0	-1	188688794	188688814	chr3	+	0	AAGGAGCTCACAGTCTATTGA	AAGGAGCTCACAGTCTATTGA	not reported	not reported	not reported	not reported	0.0212594	0.0275222	47.0401	59.7492	57.9857	62.8846	37.8529	53.5633	58.8335	60.1152	True	False	False	False	False	False
miR-30d-3p__mir-30d__0__-1__21M	hsa-mir-30d	MI0000255	hsa-miR-30d-3p	MIMAT0004551	0	-1	134804880	134804900	chr8	-	0	CTTTCAGTCAGATGTTTGCTG	CTTTCAGTCAGATGTTTGCTG	not reported	not reported	not reported	not reported	6.63652e-05	0.000114394	2.84577	2.93144	1.73528	1.83288	2.26766	1.45334	2.82821	1.52994	False	False	False	True	False	False
let-7i-5p__let-7i__0__+1__23M	hsa-let-7i	MI0000434	hsa-let-7i-5p	MIMAT0000415	0	1	62603691	62603713	chr12	+	0	TGAGGTAGTAGTTTGTGCTGTTG	TGAGGTAGTAGTTTGTGCTGTTG	not reported	not reported	not reported	not reported	7.20922e-08	1.63773e-07	83.854	104.745	154.054	164.063	75.6324	132.685	103.186	142.282	False	False	True	False	False	False
miR-21-3p__mir-21__0__+1__22M	hsa-mir-21	MI0000077	hsa-miR-21-3p	MIMAT0004494	0	1	59841311	59841332	chr17	+	0	CAACACCAGTCGATGGGCTGTC	CAACACCAGTCGATGGGCTGTC	not reported	not reported	not reported	not reported	8.73223e-20	1.40593e-18	480.533	494.748	1870.97	1554.89	398.208	1479.05	464.604	1269.72	False	False	True	False	False	False
miR-181a-2-3p__mir-181a-2__0__-5__17M	hsa-mir-181a-2	MI0000269	hsa-miR-181a-2-3p	MIMAT0004558	0	-5	124692518	124692534	chr9	+	0	ACCACTGACCGTTGACT	ACCACTGACCGTTGACT	not reported	not reported	not reported	not reported	0.00449415	0.0063706	2.6734	3.59678	3.83212	3.05468	1.7734	2.92067	2.50982	2.45631	False	False	False	False	True	False
miR-424-5p__mir-424__0__-1__21M	hsa-mir-424	MI0001446	hsa-miR-424-5p	MIMAT0001341	0	-1	134546681	134546701	chrX	-	0	CAGCAGCAATTCATGTTTTGA	CAGCAGCAATTCATGTTTTGA	not reported	not reported	not reported	not reported	5.60203e-09	1.40891e-08	15.5132	20.4391	42.8019	52.9652	11.7977	29.8613	16.6998	36.8593	False	False	True	False	False	False
miR-26b-3p__mir-26b__0__+1__22M	hsa-mir-26b	MI0000084	hsa-miR-26b-3p	MIMAT0004500	0	1	218402692	218402713	chr2	+	0	CCTGTTCTCCATTACTTGGCTC	CCTGTTCTCCATTACTTGGCTC	not reported	not reported	not reported	not reported	2.54e-07	5.42583e-07	3.33749	0.802535	4.08323	4.01345	1.69928	3.31966	0.737877	3.44848	False	False	True	False	False	False
miR-21-5p__mir-21__-1__-1__22M	hsa-mir-21	MI0000077	hsa-miR-21-5p	MIMAT0000076	-1	-1	59841272	59841293	chr17	+	0	GTAGCTTATCAGACTGATGTTG	GTAGCTTATCAGACTGATGTTG	not reported	not reported	not reported	not reported	1.5949e-23	9.04675e-22	16.8775	22.8601	79.0357	83.999	9.86803	69.3478	21.6849	74.6838	False	False	True	False	False	False
miR-140-3p__mir-140__0__+3__24M	hsa-mir-140	MI0000456	hsa-miR-140-3p	MIMAT0004597	0	3	69933142	69933165	chr16	+	0	TACCACAGGGTAGAACCACGGACA	TACCACAGGGTAGAACCACGGACA	not reported	not reported	not reported	not reported	1.06551e-09	2.91218e-09	78.2198	61.5832	46.8817	43.9487	72.3561	31.5355	61.2299	33.9269	False	False	False	True	False	False
miR-4286__mir-4286__0__+1__18M	hsa-mir-4286	MI0015894	hsa-miR-4286	MIMAT0016916	0	1	10666988	10667005	chr8	+	0	ACCCCACTCCTGGTACCA	ACCCCACTCCTGGTACCA	not reported	not reported	not reported	not reported	0.000379547	0.000602147	25.854	10.2971	7.49643	6.55985	12.2773	5.53584	8.78073	4.62829	False	False	False	True	False	False
miR-192-5p__mir-192__0__-3__18M	hsa-mir-192	MI0000234	hsa-miR-192-5p	MIMAT0000222	0	-3	64891206	64891223	chr11	-	0	CTGACCTATGAATTGACA	CTGACCTATGAATTGACA	not reported	not reported	not reported	not reported	0.000121865	0.000204234	1.77929	1.18969	13.8194	3.00261	1.28942	3.2827	1.05132	1.75039	False	False	True	False	False	False
miR-23a-3p__mir-23a__0__+3__24M	hsa-mir-23a	MI0000079	hsa-miR-23a-3p	MIMAT0000078	0	3	13836592	13836615	chr19	-	0	ATCACATTGCCAGGGATTTCCAAC	ATCACATTGCCAGGGATTTCCAAC	not reported	not reported	not reported	not reported	0.000475904	0.000748574	0.716523	0.64014	1.27376	1.45518	0.581291	1.03777	0.543761	1.21507	False	False	True	False	False	False
miR-21-5p__mir-21__+4__+2__20M	hsa-mir-21	MI0000077	hsa-miR-21-5p	MIMAT0000076	4	2	59841277	59841296	chr17	+	0	TTATCAGACTGATGTTGACT	TTATCAGACTGATGTTGACT	not reported	not reported	not reported	not reported	2.56537e-18	3.14153e-17	0.0881286	0.162722	3.83477	2.93564	0.0786171	1.99734	0.151008	2.06554	False	False	True	False	False	False
miR-181b-5p__mir-181b-1__0__-5__18M	hsa-mir-181b-1	MI0000270	hsa-miR-181b-5p	MIMAT0000257	0	-5	198858930	198858947	chr1	-	0	AACATTCATTGCTGTCGG	AACATTCATTGCTGTCGG	not reported	not reported	not reported	not reported	2.23265e-08	5.33493e-08	12.9366	12.9789	26.046	28.7825	11.1006	21.1383	12.0575	23.8755	False	False	True	False	False	False
miR-127-5p__mir-127__0__0__22M	hsa-mir-127	MI0000472	hsa-miR-127-5p	MIMAT0004604	0	0	100883001	100883022	chr14	+	0	CTGAAGCTCAGAGGGCTCTGAT	CTGAAGCTCAGAGGGCTCTGAT	not reported	not reported	not reported	not reported	1.07816e-22	3.89724e-21	2.33844	2.19442	55.2869	31.8907	2.01706	23.7077	1.99257	22.5107	False	False	True	False	False	False
miR-218-5p__mir-218-1__0__+1__22M	hsa-mir-218-1	MI0000294	hsa-miR-218-5p	MIMAT0000275	0	1	20528299	20528320	chr4	+	0	TTGTGCTTGATCTAACCATGTG	TTGTGCTTGATCTAACCATGTG	not reported	not reported	not reported	not reported	1.21923e-09	3.3078e-09	30.0518	35.2411	15.7473	15.0634	20.3118	13.2905	35.0622	12.9093	False	False	False	True	False	False
miR-205-5p__mir-205__0__-6__16M	hsa-mir-205	MI0000285	hsa-miR-205-5p	MIMAT0000266	0	-6	209432166	209432181	chr1	+	0	TCCTTCATTCCACCGG	TCCTTCATTCCACCGG	not reported	not reported	not reported	not reported	0.000136059	0.000226888	0.785239	0.165639	10.2021	4.33329	0.498716	1.8736	0.149378	1.86611	False	False	True	False	False	False
miR-503-5p__mir-503__0__-1__22M	hsa-mir-503	MI0003188	hsa-miR-503-5p	MIMAT0002874	0	-1	134546372	134546393	chrX	-	0	TAGCAGCGGGAACAGTTCTGCA	TAGCAGCGGGAACAGTTCTGCA	not reported	not reported	not reported	not reported	1.28121e-16	1.13827e-15	0.243915	0.0870069	1.8773	3.21686	0.184767	1.26773	0.0803126	2.17466	False	False	True	False	False	False
miR-181b-5p__mir-181b-1__0__-2__21M	hsa-mir-181b-1	MI0000270	hsa-miR-181b-5p	MIMAT0000257	0	-2	198858927	198858947	chr1	-	0	AACATTCATTGCTGTCGGTGG	AACATTCATTGCTGTCGGTGG	not reported	not reported	not reported	not reported	0.00624145	0.00870356	170.034	206.857	260.079	269.727	156.445	211.213	202.992	232.229	False	False	True	False	False	False
miR-221-3p__mir-221__0__-1__22M	hsa-mir-221	MI0000298	hsa-miR-221-3p	MIMAT0000278	0	-1	45746181	45746202	chrX	-	0	AGCTACATTGTCTGCTGGGTTT	AGCTACATTGTCTGCTGGGTTT	not reported	not reported	not reported	not reported	7.24554e-05	0.00012431	104.893	124.067	82.3611	86.1199	85.9428	65.4241	123.79	65.9318	False	False	False	True	False	False
miR-425-5p__mir-425__+2__+2__23M	hsa-mir-425	MI0001448	hsa-miR-425-5p	MIMAT0003393	2	2	49020197	49020219	chr3	-	0	TGACACGATCACTCCCGTTGAGT	TGACACGATCACTCCCGTTGAGT	not reported	not reported	not reported	not reported	2.6824e-06	5.24392e-06	0.4685	0.749777	1.56988	1.48156	0.371784	1.07261	0.653126	0.905845	False	False	True	False	False	False
miR-16-5p__mir-16-1__0__-2__20M	hsa-mir-16-1	MI0000070	hsa-miR-16-5p	MIMAT0000069	0	-2	50049029	50049048	chr13	-	0	TAGCAGCACGTAAATATTGG	TAGCAGCACGTAAATATTGG	not reported	not reported	not reported	not reported	1.62186e-09	4.32378e-09	145.225	201.924	56.0477	64.6894	78.9493	47.2379	147.437	54.4015	False	False	False	True	False	False
miR-205-5p__mir-205__0__-4__18M	hsa-mir-205	MI0000285	hsa-miR-205-5p	MIMAT0000266	0	-4	209432166	209432183	chr1	+	0	TCCTTCATTCCACCGGAG	TCCTTCATTCCACCGGAG	not reported	not reported	not reported	not reported	0.000134425	0.000224672	0.898894	0.222328	8.28416	7.77335	0.551149	2.10584	0.211054	2.5205	False	False	True	False	False	False
miR-30e-5p__mir-30e__+1__+4__25M	hsa-mir-30e	MI0000749	hsa-miR-30e-5p	MIMAT0000692	1	4	40754372	40754396	chr1	+	0	GTAAACATCCTTGACTGGAAGCTGT	GTAAACATCCTTGACTGGAAGCTGT	not reported	not reported	not reported	not reported	1.46845e-20	2.80527e-19	1.35312	0.433053	11.3704	10.0726	0.800675	7.79719	0.420419	7.81024	False	False	True	False	False	False
miR-486-5p__mir-486-1__0__-2__20M	hsa-mir-486-1	MI0002470	hsa-miR-486-5p	MIMAT0002177	0	-2	41660486	41660505	chr8	-	0	TCCTGTACTGAGCTGCCCCG	TCCTGTACTGAGCTGCCCCG	not reported	not reported	not reported	not reported	1.16457e-23	7.40302e-22	348.337	204.551	17.6586	18.6712	160.465	9.73481	132.681	8.5687	False	False	False	True	False	False
miR-29a-3p__mir-29a__-1__+1__24M	hsa-mir-29a	MI0000087	hsa-miR-29a-3p	MIMAT0000086	-1	1	130876747	130876770	chr7	-	0	CTAGCACCATCTGAAATCGGTTAT	CTAGCACCATCTGAAATCGGTTAT	not reported	not reported	not reported	not reported	1.32829e-08	3.23902e-08	1.03384	1.40754	3.04852	3.98745	0.782943	2.15564	0.986437	2.91746	False	False	True	False	False	False
let-7i-3p__let-7i__0__0__22M	hsa-let-7i	MI0000434	hsa-let-7i-3p	MIMAT0004585	0	0	62603747	62603768	chr12	+	0	CTGCGCAAGCTACTGCCTTGCT	CTGCGCAAGCTACTGCCTTGCT	not reported	not reported	not reported	not reported	1.06177e-08	2.60635e-08	14.0433	15.0167	27.7817	26.3923	11.9498	23.3323	13.1905	22.229	False	False	True	False	False	False
miR-375-3p__mir-375__0__-3__19M	hsa-mir-375	MI0000783	hsa-miR-375-3p	MIMAT0000728	0	-3	219001651	219001669	chr2	-	0	TTTGTTCGTTCGGCTCGCG	TTTGTTCGTTCGGCTCGCG	not reported	not reported	not reported	not reported	1.36117e-08	3.31701e-08	1461.25	573.238	5727.95	5504.25	574.098	1796.82	521.583	1646.79	False	False	True	False	False	False
miR-374a-3p__mir-374a__0__-2__20M	hsa-mir-374a	MI0000782	hsa-miR-374a-3p	MIMAT0004688	0	-2	74287297	74287316	chrX	-	0	CTTATCAGATTGTATTGTAA	CTTATCAGATTGTATTGTAA	not reported	not reported	not reported	not reported	0.00384881	0.00549596	130.445	123.167	71.0483	75.404	51.6505	59.819	104.616	65.8634	False	False	False	False	True	False
miR-511-5p__mir-511__0__-1__20M	hsa-mir-511	MI0003127	hsa-miR-511-5p	MIMAT0002808	0	-1	17845122	17845141	chr10	+	0	GTGTCTTTTGCTCTGCAGTC	GTGTCTTTTGCTCTGCAGTC	not reported	not reported	not reported	not reported	0.00600945	0.00839592	4.40948	3.28884	3.50649	2.11572	2.97915	2.75076	3.00458	1.69905	False	False	False	True	False	False
miR-767-5p__mir-767__0__0__23M	hsa-mir-767	MI0003763	hsa-miR-767-5p	MIMAT0003882	0	0	152393481	152393503	chrX	-	0	TGCACCATGGTTGTCTGAGCATG	TGCACCATGGTTGTCTGAGCATG	not reported	not reported	not reported	not reported	0.000183136	0.000300365	0.105151	0.109885	13.5131	20.5889	0.0748407	1.16472	0.0994155	2.62382	False	False	True	False	False	False
miR-182-5p__mir-182__+4__0__20M	hsa-mir-182	MI0000272	hsa-miR-182-5p	MIMAT0000259	4	0	129770447	129770466	chr7	-	0	GCAATGGTAGAACTCACACT	GCAATGGTAGAACTCACACT	not reported	not reported	not reported	not reported	3.63497e-13	1.68368e-12	0.158711	0.164639	1.73256	1.24509	0.139643	1.15291	0.137493	1.04447	False	False	True	False	False	False
miR-625-3p__mir-625__0__+1__23M	hsa-mir-625	MI0003639	hsa-miR-625-3p	MIMAT0004808	0	1	65471153	65471175	chr14	+	0	GACTATAGAACTTTCCCCCTCAT	GACTATAGAACTTTCCCCCTCAT	not reported	not reported	not reported	not reported	1.3675e-07	2.98518e-07	3.08756	3.00286	7.02439	7.654	2.56533	5.30496	2.95104	5.68035	False	False	True	False	False	False
miR-200c-3p__mir-200c__-1__0__24M	hsa-mir-200c	MI0000650	hsa-miR-200c-3p	MIMAT0000617	-1	0	6963741	6963764	chr12	+	0	CTAATACTGCCGGGTAATGATGGA	CTAATACTGCCGGGTAATGATGGA	not reported	not reported	not reported	not reported	2.56498e-11	8.45137e-11	1.94131	0.792187	5.63317	7.83902	1.1894	3.74864	0.727345	4.18975	False	False	True	False	False	False
miR-1307-3p__mir-1307__0__0__22M	hsa-mir-1307	MI0006444	hsa-miR-1307-3p	MIMAT0005951	0	0	103394301	103394322	chr10	-	0	ACTCGGCGTGGCGTCGGTCGTG	ACTCGGCGTGGCGTCGGTCGTG	not reported	not reported	not reported	not reported	3.3154e-12	1.27199e-11	36.8499	15.7477	78.6228	100.087	19.9573	58.1683	15.3073	77.013	False	False	True	False	False	False
miR-21-5p__mir-21__0__-5__17M	hsa-mir-21	MI0000077	hsa-miR-21-5p	MIMAT0000076	0	-5	59841273	59841289	chr17	+	0	TAGCTTATCAGACTGAT	TAGCTTATCAGACTGAT	not reported	not reported	not reported	not reported	8.46885e-12	2.98515e-11	347.034	368.793	692.886	656.135	101.111	577.082	254.645	600.896	False	False	True	False	False	False
miR-30a-5p__mir-30a__0__-6__16M	hsa-mir-30a	MI0000088	hsa-miR-30a-5p	MIMAT0000087	0	-6	71403601	71403616	chr6	-	0	TGTAAACATCCTCGAC	TGTAAACATCCTCGAC	not reported	not reported	not reported	not reported	2.08681e-06	4.11228e-06	80.4023	102.092	84.8922	34.6941	55.6529	32.5168	92.5645	22.4134	False	False	False	True	False	False
miR-582-3p__mir-582__0__-4__18M	hsa-mir-582	MI0003589	hsa-miR-582-3p	MIMAT0004797	0	-4	59703634	59703651	chr5	-	0	TAACTGGTTGAACAACTG	TAACTGGTTGAACAACTG	not reported	not reported	not reported	not reported	0.000106732	0.000180432	1.67022	2.53007	11.2632	15.473	1.30367	3.92439	2.13537	5.61193	False	False	True	False	False	False
miR-200a-3p__mir-200a__0__-1__21M	hsa-mir-200a	MI0000737	hsa-miR-200a-3p	MIMAT0000682	0	-1	1167916	1167936	chr1	+	0	TAACACTGTCTGGTAACGATG	TAACACTGTCTGGTAACGATG	not reported	not reported	not reported	not reported	0.000113876	0.000191629	38.9357	43.9496	113.957	96.0343	26.5144	64.3019	42.4922	69.1573	False	False	True	False	False	False
miR-183-5p__mir-183__+4__0__18M	hsa-mir-183	MI0000273	hsa-miR-183-5p	MIMAT0000261	4	0	129774967	129774984	chr7	-	0	GCACTGGTAGAATTCACT	GCACTGGTAGAATTCACT	not reported	not reported	not reported	not reported	1.23047e-10	3.72475e-10	0.255344	0.300538	1.83518	1.50809	0.209615	1.21228	0.276783	1.18277	False	False	True	False	False	False
miR-200a-5p__mir-200a__0__-2__20M	hsa-mir-200a	MI0000737	hsa-miR-200a-5p	MIMAT0001620	0	-2	1167878	1167897	chr1	+	0	CATCTTACCGGACAGTGCTG	CATCTTACCGGACAGTGCTG	not reported	not reported	not reported	not reported	7.14016e-19	9.64314e-18	6.7479	1.59777	20.2307	17.5894	2.65123	13.0186	1.43192	11.4771	False	False	True	False	False	False
miR-22-3p__mir-22__0__-2__20M	hsa-mir-22	MI0000078	hsa-miR-22-3p	MIMAT0000077	0	-2	1713916	1713935	chr17	-	0	AAGCTGCCAGTTGAAGAACT	AAGCTGCCAGTTGAAGAACT	not reported	not reported	not reported	not reported	0.0315176	0.0400294	341.366	312.027	436.063	432.994	312.578	384.736	306.549	395.904	False	False	True	False	False	False
miR-103a-3p__mir-103a-1__+2__0__21M	hsa-mir-103a-1	MI0000109	hsa-miR-103a-3p	MIMAT0000101	2	0	168560904	168560924	chr5	-	0	CAGCATTGTACAGGGCTATGA	CAGCATTGTACAGGGCTATGA	not reported	not reported	not reported	not reported	0.016983	0.022339	174.139	236.137	262.958	278.575	138.896	224.359	229.941	239.021	True	False	False	False	False	False
miR-7-1-3p__mir-7-1__0__-1__21M	hsa-mir-7-1	MI0000263	hsa-miR-7-1-3p	MIMAT0004553	0	-1	83969772	83969792	chr9	-	0	CAACAAATCACAGTCTGCCAT	CAACAAATCACAGTCTGCCAT	not reported	not reported	not reported	not reported	4.8957e-15	3.33034e-14	0.689676	0.592499	2.44413	2.20668	0.559305	2.0408	0.544875	1.87355	False	False	True	False	False	False
miR-30e-3p__mir-30e__0__-2__20M	hsa-mir-30e	MI0000749	hsa-miR-30e-3p	MIMAT0000693	0	-2	40754413	40754432	chr1	+	0	CTTTCAGTCGGATGTTTACA	CTTTCAGTCGGATGTTTACA	not reported	not reported	not reported	not reported	5.78788e-05	0.00010014	994.848	957.249	719.453	620.532	873.354	624.392	924.92	553.586	False	False	False	True	False	False
let-7e-5p__let-7e__0__-4__18M	hsa-let-7e	MI0000066	hsa-let-7e-5p	MIMAT0000066	0	-4	51692793	51692810	chr19	+	0	TGAGGTAGGAGGTTGTAT	TGAGGTAGGAGGTTGTAT	not reported	not reported	not reported	not reported	0.00140155	0.00210147	38.2953	38.1901	33.3431	35.0103	28.3925	15.8526	36.5305	24.0942	False	False	False	True	False	False
miR-151a-3p__mir-151a__-2__-2__21M	hsa-mir-151a	MI0000809	hsa-miR-151a-3p	MIMAT0000757	-2	-2	140732589	140732609	chr8	-	0	TACTAGACTGAAGCTCCTTGA	TACTAGACTGAAGCTCCTTGA	not reported	not reported	not reported	not reported	3.86761e-07	8.08383e-07	90.7533	108.858	159.937	165.656	70.9975	141.275	106.593	147.503	False	False	True	False	False	False
miR-542-3p__mir-542__0__+1__23M	hsa-mir-542	MI0003686	hsa-miR-542-3p	MIMAT0003389	0	1	134541363	134541385	chrX	-	0	TGTGACAGATTGATAACTGAAAG	TGTGACAGATTGATAACTGAAAG	not reported	not reported	not reported	not reported	2.413e-17	2.4308e-16	2.62457	3.35154	16.5145	19.8546	2.09937	10.5992	2.67623	12.3095	False	False	True	False	False	False
miR-140-3p__mir-140__+1__-1__19M	hsa-mir-140	MI0000456	hsa-miR-140-3p	MIMAT0004597	1	-1	69933143	69933161	chr16	+	0	ACCACAGGGTAGAACCACG	ACCACAGGGTAGAACCACG	not reported	not reported	not reported	not reported	2.25865e-06	4.43904e-06	8.88808	8.57496	5.48389	5.19728	7.73997	4.72049	7.78553	4.39979	False	False	False	True	False	False
miR-22-3p__mir-22__-1__-6__17M	hsa-mir-22	MI0000078	hsa-miR-22-3p	MIMAT0000077	-1	-6	1713920	1713936	chr17	-	0	AAAGCTGCCAGTTGAAG	AAAGCTGCCAGTTGAAG	not reported	not reported	not reported	not reported	5.87905e-08	1.34634e-07	0.496877	0.46345	2.05197	2.31152	0.421585	1.46459	0.398147	1.73044	False	False	True	False	False	False
miR-30a-5p__mir-30a__0__-3__19M	hsa-mir-30a	MI0000088	hsa-miR-30a-5p	MIMAT0000087	0	-3	71403598	71403616	chr6	-	0	TGTAAACATCCTCGACTGG	TGTAAACATCCTCGACTGG	not reported	not reported	not reported	not reported	5.25834e-08	1.21096e-07	1701.56	1849.65	719.018	488.528	1019.49	369.326	1734.64	308.585	False	False	False	True	False	False
miR-181c-5p__mir-181c__0__-3__19M	hsa-mir-181c	MI0000271	hsa-miR-181c-5p	MIMAT0000258	0	-3	13874725	13874743	chr19	+	0	AACATTCAACCTGTCGGTG	AACATTCAACCTGTCGGTG	not reported	not reported	not reported	not reported	0.000114509	0.00019252	1.37869	1.63684	3.48181	4.02919	0.937677	2.18533	1.44581	2.6024	False	False	True	False	False	False
miR-34a-5p__mir-34a__0__+1__23M	hsa-mir-34a	MI0000268	hsa-miR-34a-5p	MIMAT0000255	0	1	9151734	9151756	chr1	-	0	TGGCAGTGTCTTAGCTGGTTGTT	TGGCAGTGTCTTAGCTGGTTGTT	not reported	not reported	not reported	not reported	1.9842e-09	5.22552e-09	29.1347	36.0515	68.8141	80.5974	26.0898	54.2656	31.9297	62.2122	False	False	True	False	False	False
miR-23b-3p__mir-23b__+1__-1__21M	hsa-mir-23b	MI0000439	hsa-miR-23b-3p	MIMAT0000418	1	-1	95085266	95085286	chr9	+	0	TCACATTGCCAGGGATTACCA	TCACATTGCCAGGGATTACCA	not reported	not reported	not reported	not reported	0.00202945	0.0029863	15.3402	15.7832	22.0177	12.3264	14.1327	14.4289	15.7511	9.7229	False	False	False	False	True	False
let-7a-5p__let-7a-1__0__-2__20M	hsa-let-7a-1	MI0000060	hsa-let-7a-5p	MIMAT0000062	0	-2	94175962	94175981	chr9	+	0	TGAGGTAGTAGGTTGTATAG	TGAGGTAGTAGGTTGTATAG	not reported	not reported	not reported	not reported	2.11672e-19	3.1093e-18	14926.1	15772	5218.73	4730.73	13466.9	4108.62	14888.2	4029.94	False	False	False	True	False	False
miR-21-5p__mir-21__-1__-3__20M	hsa-mir-21	MI0000077	hsa-miR-21-5p	MIMAT0000076	-1	-3	59841272	59841291	chr17	+	0	GTAGCTTATCAGACTGATGT	GTAGCTTATCAGACTGATGT	not reported	not reported	not reported	not reported	1.93052e-10	5.71712e-10	0.487904	0.404624	1.64147	1.37088	0.416587	1.32165	0.374764	1.12235	False	False	True	False	False	False
miR-30a-5p__mir-30a__+1__+1__22M	hsa-mir-30a	MI0000088	hsa-miR-30a-5p	MIMAT0000087	1	1	71403594	71403615	chr6	-	0	GTAAACATCCTCGACTGGAAGC	GTAAACATCCTCGACTGGAAGC	not reported	not reported	not reported	not reported	1.8467e-18	2.33979e-17	80.1033	98.968	16.3538	13.7206	61.7948	11.7783	95.6493	10.0643	False	False	False	True	False	False
miR-301a-5p__mir-301a__0__-1__21M	hsa-mir-301a	MI0000745	hsa-miR-301a-5p	MIMAT0022696	0	-1	59151188	59151208	chr17	-	0	GCTCTGACTTTATTGCACTAC	GCTCTGACTTTATTGCACTAC	not reported	not reported	not reported	not reported	9.32865e-17	8.6419e-16	0.0569426	0.04891	2.25497	1.79143	0.0500651	1.36761	0.0438197	1.27725	False	False	True	False	False	False
miR-182-5p__mir-182__0__-1__23M	hsa-mir-182	MI0000272	hsa-miR-182-5p	MIMAT0000259	0	-1	129770448	129770470	chr7	-	0	TTTGGCAATGGTAGAACTCACAC	TTTGGCAATGGTAGAACTCACAC	not reported	not reported	not reported	not reported	1.87507e-24	2.03335e-22	207.799	194.522	1985.06	1998.3	142.52	1299.8	191.773	1462.45	False	False	True	False	False	False
miR-16-1-3p__mir-16-1__0__0__22M	hsa-mir-16-1	MI0000070	hsa-miR-16-1-3p	MIMAT0004489	0	0	50048985	50049006	chr13	-	0	CCAGTATTAACTGTGCTGCTGA	CCAGTATTAACTGTGCTGCTGA	not reported	not reported	not reported	not reported	7.01435e-08	1.59598e-07	1.34962	2.3584	2.65268	3.23303	1.08925	2.31896	2.32642	2.88308	True	False	False	False	False	False
miR-30e-3p__mir-30e__0__-6__16M	hsa-mir-30e	MI0000749	hsa-miR-30e-3p	MIMAT0000693	0	-6	40754413	40754428	chr1	+	0	CTTTCAGTCGGATGTT	CTTTCAGTCGGATGTT	not reported	not reported	not reported	not reported	0.0177887	0.0232742	33.2908	34.477	55.079	19.1879	24.6635	19.0484	26.0763	14.7614	False	False	False	True	False	False
miR-423-3p__mir-423__0__-2__21M	hsa-mir-423	MI0001445	hsa-miR-423-3p	MIMAT0001340	0	-2	30117131	30117151	chr17	+	0	AGCTCGGTCTGAGGCCCCTCA	AGCTCGGTCTGAGGCCCCTCA	not reported	not reported	not reported	not reported	8.21259e-07	1.66373e-06	14.941	7.4533	16.0092	15.6386	9.35031	13.7173	7.25573	14.0681	False	False	True	False	False	False
miR-155-5p__mir-155__0__0__24M	hsa-mir-155	MI0000681	hsa-miR-155-5p	MIMAT0000646	0	0	25573983	25574006	chr21	+	0	TTAATGCTAATCGTGATAGGGGTT	TTAATGCTAATCGTGATAGGGGTT	not reported	not reported	not reported	not reported	1.11743e-11	3.86851e-11	10.1181	9.34106	39.1574	33.8156	7.88062	24.3985	8.32955	25.4059	False	False	True	False	False	False
miR-139-3p__mir-139__0__-2__21M	hsa-mir-139	MI0000261	hsa-miR-139-3p	MIMAT0004552	0	-2	72615068	72615088	chr11	-	0	TGGAGACGCGGCCCTGTTGGA	TGGAGACGCGGCCCTGTTGGA	not reported	not reported	not reported	not reported	3.22643e-23	1.46863e-21	70.0139	33.4743	6.90236	5.92517	43.8045	4.74584	31.5921	4.41645	False	False	False	True	False	False
miR-301a-3p__mir-301a__0__-1__22M	hsa-mir-301a	MI0000745	hsa-miR-301a-3p	MIMAT0000688	0	-1	59151150	59151171	chr17	-	0	CAGTGCAATAGTATTGTCAAAG	CAGTGCAATAGTATTGTCAAAG	not reported	not reported	not reported	not reported	5.28042e-21	1.11251e-19	0.448123	0.601093	4.94532	4.53765	0.388985	3.55543	0.565896	3.5991	False	False	True	False	False	False
miR-143-3p__mir-143__-1__+1__23M	hsa-mir-143	MI0000459	hsa-miR-143-3p	MIMAT0000435	-1	1	149428977	149428999	chr5	+	0	CTGAGATGAAGCACTGTAGCTCA	CTGAGATGAAGCACTGTAGCTCA	not reported	not reported	not reported	not reported	5.34138e-12	1.94987e-11	15.9297	16.6323	4.3215	4.19772	10.5197	3.37346	15.8621	3.38623	False	False	False	True	False	False
miR-92a-3p__mir-92a-1__0__+2__24M	hsa-mir-92a-1	MI0000093	hsa-miR-92a-3p	MIMAT0000092	0	2	91351361	91351384	chr13	+	0	TATTGCACTTGTCCCGGCCTGTTG	TATTGCACTTGTCCCGGCCTGTTG	not reported	not reported	not reported	not reported	0.000105219	0.000178037	5.41398	1.83268	4.57708	4.17839	2.30715	3.41617	1.591	3.23836	False	False	True	False	False	False
miR-143-3p__mir-143__-1__-4__18M	hsa-mir-143	MI0000459	hsa-miR-143-3p	MIMAT0000435	-1	-4	149428977	149428994	chr5	+	0	CTGAGATGAAGCACTGTA	CTGAGATGAAGCACTGTA	not reported	not reported	not reported	not reported	0.000308233	0.000493681	3.25891	2.7715	1.79408	2.15084	2.43891	1.39309	2.46168	1.33005	False	False	False	True	False	False
miR-182-5p__mir-182__0__-4__20M	hsa-mir-182	MI0000272	hsa-miR-182-5p	MIMAT0000259	0	-4	129770451	129770470	chr7	-	0	TTTGGCAATGGTAGAACTCA	TTTGGCAATGGTAGAACTCA	not reported	not reported	not reported	not reported	7.19639e-12	2.56985e-11	948.738	1073.87	3266.14	3373.29	522.956	2324.08	967.381	2481.93	False	False	True	False	False	False
miR-29c-3p__mir-29c__0__-3__19M	hsa-mir-29c	MI0000735	hsa-miR-29c-3p	MIMAT0000681	0	-3	207801868	207801886	chr1	-	0	TAGCACCATTTGAAATCGG	TAGCACCATTTGAAATCGG	not reported	not reported	not reported	not reported	0.000652501	0.00101253	1611.23	1465.74	873.982	915.634	711.694	592.913	1277.63	662.432	False	False	False	True	False	False
miR-182-5p__mir-182__+1__-4__19M	hsa-mir-182	MI0000272	hsa-miR-182-5p	MIMAT0000259	1	-4	129770451	129770469	chr7	-	0	TTGGCAATGGTAGAACTCA	TTGGCAATGGTAGAACTCA	not reported	not reported	not reported	not reported	8.84683e-12	3.1065e-11	0.454866	0.528132	2.45677	2.30453	0.397577	1.66468	0.417512	1.5807	False	False	True	False	False	False
let-7d-3p__let-7d__+1__0__21M	hsa-let-7d	MI0000065	hsa-let-7d-3p	MIMAT0004484	1	0	94178896	94178916	chr9	+	0	TATACGACCTGCTGCCTTTCT	TATACGACCTGCTGCCTTTCT	not reported	not reported	not reported	not reported	0.00843051	0.0114912	66.0274	13.7336	11.458	12.7221	20.9295	10.051	13.4114	10.3266	False	False	False	True	False	False
miR-374b-5p__mir-374b__0__-5__17M	hsa-mir-374b	MI0005566	hsa-miR-374b-5p	MIMAT0004955	0	-5	74218592	74218608	chrX	-	0	ATATAATACAACCTGCT	ATATAATACAACCTGCT	not reported	not reported	not reported	not reported	0.00231943	0.00338817	2.01765	3.39817	3.38481	5.47851	1.56139	2.46659	2.70433	3.75883	True	False	False	False	False	False
miR-145-3p__mir-145__+1__0__21M	hsa-mir-145	MI0000461	hsa-miR-145-3p	MIMAT0004601	1	0	149430700	149430720	chr5	+	0	GATTCCTGGAAATACTGTTCT	GATTCCTGGAAATACTGTTCT	not reported	not reported	not reported	not reported	6.99143e-07	1.42653e-06	3.89642	3.6191	1.96128	2.06805	3.05777	1.64699	3.29912	1.78169	False	False	False	True	False	False
miR-143-3p__mir-143__-1__-3__19M	hsa-mir-143	MI0000459	hsa-miR-143-3p	MIMAT0000435	-1	-3	149428977	149428995	chr5	+	0	CTGAGATGAAGCACTGTAG	CTGAGATGAAGCACTGTAG	not reported	not reported	not reported	not reported	1.94814e-07	4.204e-07	175.33	137.138	64.4101	58.8075	102.535	50.9521	120.802	43.7431	False	False	False	True	False	False
miR-24-3p__mir-24-1__-1__0__23M	hsa-mir-24-1	MI0000080	hsa-miR-24-3p	MIMAT0000080	-1	0	95086063	95086085	chr9	+	0	CTGGCTCAGTTCAGCAGGAACAG	CTGGCTCAGTTCAGCAGGAACAG	not reported	not reported	not reported	not reported	5.83587e-10	1.63007e-09	0.862676	0.433676	2.10396	2.40598	0.736822	1.753	0.398697	1.99771	False	False	True	False	False	False
miR-891a-5p__mir-891a__0__0__22M	hsa-mir-891a	MI0005524	hsa-miR-891a-5p	MIMAT0004902	0	0	146027841	146027862	chrX	-	0	TGCAACGAACCTGAGCCACTGA	TGCAACGAACCTGAGCCACTGA	not reported	not reported	not reported	not reported	0.000393643	0.000623704	1.69616	0.18225	8.85359	9.35354	0.839042	2.01603	0.162907	2.18428	False	False	True	False	False	False
miR-130a-3p__mir-130a__0__-2__20M	hsa-mir-130a	MI0000448	hsa-miR-130a-3p	MIMAT0000425	0	-2	57641252	57641271	chr11	+	0	CAGTGCAATGTTAAAAGGGC	CAGTGCAATGTTAAAAGGGC	not reported	not reported	not reported	not reported	0.00766664	0.0104925	10.2584	10.8147	7.52559	6.5465	8.19911	5.97708	8.52556	5.55817	False	False	False	True	False	False
miR-574-5p__mir-574__0__-3__20M	hsa-mir-574	MI0003581	hsa-miR-574-5p	MIMAT0004795	0	-3	38868056	38868075	chr4	+	0	TGAGTGTGTGTGTGTGAGTG	TGAGTGTGTGTGTGTGAGTG	not reported	not reported	not reported	not reported	1.22181e-06	2.44429e-06	0.687855	0.206797	1.58436	1.63822	0.492185	1.12175	0.194905	1.29034	False	False	True	False	False	False
let-7d-3p__let-7d__0__0__22M	hsa-let-7d	MI0000065	hsa-let-7d-3p	MIMAT0004484	0	0	94178895	94178916	chr9	+	0	CTATACGACCTGCTGCCTTTCT	CTATACGACCTGCTGCCTTTCT	not reported	not reported	not reported	not reported	1.06059e-06	2.12984e-06	1235.61	255.314	158.256	162.58	342.406	139.023	244.402	137.854	False	False	False	True	False	False
miR-182-5p__mir-182__+7__0__17M	hsa-mir-182	MI0000272	hsa-miR-182-5p	MIMAT0000259	7	0	129770447	129770463	chr7	-	0	ATGGTAGAACTCACACT	ATGGTAGAACTCACACT	not reported	not reported	not reported	not reported	0.00171461	0.00254397	1.55547	1.58042	5.7195	4.46132	1.06592	2.6348	1.21568	1.73721	False	False	True	False	False	False
miR-423-3p__mir-423__-1__0__24M	hsa-mir-423	MI0001445	hsa-miR-423-3p	MIMAT0001340	-1	0	30117130	30117153	chr17	+	0	AAGCTCGGTCTGAGGCCCCTCAGT	AAGCTCGGTCTGAGGCCCCTCAGT	not reported	not reported	not reported	not reported	2.55018e-06	4.99867e-06	5.84333	1.6068	4.95137	5.68856	2.67053	3.88423	1.5324	4.81894	False	False	True	False	False	False
miR-200b-3p__mir-200b__0__0__22M	hsa-mir-200b	MI0000342	hsa-miR-200b-3p	MIMAT0000318	0	0	1167160	1167181	chr1	+	0	TAATACTGCCTGGTAATGATGA	TAATACTGCCTGGTAATGATGA	not reported	not reported	not reported	not reported	1.32231e-07	2.8934e-07	146.896	160.967	312.645	294.431	111.711	237.304	155.293	239.337	False	False	True	False	False	False
miR-190a-5p__mir-190a__0__-1__21M	hsa-mir-190a	MI0000486	hsa-miR-190a-5p	MIMAT0000458	0	-1	62823971	62823991	chr15	+	0	TGATATGTTTGATATATTAGG	TGATATGTTTGATATATTAGG	not reported	not reported	not reported	not reported	3.73919e-12	1.40678e-11	7.09053	12.977	1.55776	1.68498	4.66305	1.21554	11.441	1.46895	False	False	False	True	False	False
miR-374a-3p__mir-374a__0__-4__18M	hsa-mir-374a	MI0000782	hsa-miR-374a-3p	MIMAT0004688	0	-4	74287299	74287316	chrX	-	0	CTTATCAGATTGTATTGT	CTTATCAGATTGTATTGT	not reported	not reported	not reported	not reported	0.0079104	0.0108061	6.1956	6.51892	15.3003	24.3203	3.98079	6.42883	5.74816	11.3181	False	False	True	False	False	False
let-7a-2-3p__let-7a-2__0__-1__21M	hsa-let-7a-2	MI0000061	hsa-let-7a-2-3p	MIMAT0010195	0	-1	122146524	122146544	chr11	-	0	CTGTACAGCCTCCTAGCTTTC	CTGTACAGCCTCCTAGCTTTC	not reported	not reported	not reported	not reported	6.4883e-11	2.02904e-10	0.591624	0.412999	3.44678	2.9292	0.458446	1.96288	0.391807	1.804	False	False	True	False	False	False
miR-181a-2-3p__mir-181a-2__+1__0__21M	hsa-mir-181a-2	MI0000269	hsa-miR-181a-2-3p	MIMAT0004558	1	0	124692519	124692539	chr9	+	0	CCACTGACCGTTGACTGTACC	CCACTGACCGTTGACTGTACC	not reported	not reported	not reported	not reported	0.0138412	0.0184366	1.72289	1.6257	2.29467	1.39346	1.45105	1.75581	1.46018	1.15358	False	False	False	False	True	False
let-7c-3p__let-7c__0__-1__21M	hsa-let-7c	MI0000064	hsa-let-7c-3p	MIMAT0026472	0	-1	16539883	16539903	chr21	+	0	CTGTACAACCTTCTAGCTTTC	CTGTACAACCTTCTAGCTTTC	not reported	not reported	not reported	not reported	0.00140437	0.00210399	0.847307	0.426521	1.70533	1.79132	0.705288	1.26253	0.37313	1.38267	False	False	True	False	False	False
miR-27b-5p__mir-27b__-1__0__23M	hsa-mir-27b	MI0000440	hsa-miR-27b-5p	MIMAT0004588	-1	0	95085462	95085484	chr9	+	0	CAGAGCTTAGCTGATTGGTGAAC	CAGAGCTTAGCTGATTGGTGAAC	not reported	not reported	not reported	not reported	1.83257e-08	4.40853e-08	0.963298	1.2485	2.26823	2.65543	0.824603	1.92095	1.20316	2.16428	False	False	True	False	False	False
miR-374b-5p__mir-374b__0__0__22M	hsa-mir-374b	MI0005566	hsa-miR-374b-5p	MIMAT0004955	0	0	74218587	74218608	chrX	-	0	ATATAATACAACCTGCTAAGTG	ATATAATACAACCTGCTAAGTG	not reported	not reported	not reported	not reported	0.00506601	0.00714006	15.5326	24.0531	16.0738	20.015	9.90564	14.368	23.2428	17.6779	False	False	False	False	True	False
miR-30e-5p__mir-30e__+1__-2__19M	hsa-mir-30e	MI0000749	hsa-miR-30e-5p	MIMAT0000692	1	-2	40754372	40754390	chr1	+	0	GTAAACATCCTTGACTGGA	GTAAACATCCTTGACTGGA	not reported	not reported	not reported	not reported	3.6155e-25	9.60095e-23	3.25802	3.17219	45.5522	42.5031	2.53206	31.2559	2.74291	30.5509	False	False	True	False	False	False
miR-151a-3p__mir-151a__-2__-3__20M	hsa-mir-151a	MI0000809	hsa-miR-151a-3p	MIMAT0000757	-2	-3	140732590	140732609	chr8	-	0	TACTAGACTGAAGCTCCTTG	TACTAGACTGAAGCTCCTTG	not reported	not reported	not reported	not reported	1.05332e-13	5.50862e-13	6.22988	6.55979	16.4329	14.3343	5.7485	13.1506	6.45126	11.7525	False	False	True	False	False	False
let-7c-5p__let-7c__0__-5__17M	hsa-let-7c	MI0000064	hsa-let-7c-5p	MIMAT0000064	0	-5	16539838	16539854	chr21	+	0	TGAGGTAGTAGGTTGTA	TGAGGTAGTAGGTTGTA	not reported	not reported	not reported	not reported	6.69775e-13	2.93983e-12	300.051	347.256	81.7185	93.1086	189.31	57.6889	255.509	72.1133	False	False	False	True	False	False
miR-143-3p__mir-143__-2__-3__20M	hsa-mir-143	MI0000459	hsa-miR-143-3p	MIMAT0000435	-2	-3	149428976	149428995	chr5	+	0	TCTGAGATGAAGCACTGTAG	TCTGAGATGAAGCACTGTAG	not reported	not reported	not reported	not reported	4.56458e-11	1.45459e-10	8.05413	6.79418	2.72696	2.46384	5.90357	2.26419	6.19687	2.07759	False	False	False	True	False	False
miR-1287-5p__mir-1287__0__0__22M	hsa-mir-1287	MI0006349	hsa-miR-1287-5p	MIMAT0005878	0	0	98395271	98395292	chr10	-	0	TGCTGGATCAGTGGTTCGAGTC	TGCTGGATCAGTGGTTCGAGTC	not reported	not reported	not reported	not reported	0.00239479	0.0034941	3.00548	4.2408	4.38816	5.21748	2.65904	3.60017	4.15966	4.57618	True	False	False	False	False	False
miR-21-3p__mir-21__0__-1__20M	hsa-mir-21	MI0000077	hsa-miR-21-3p	MIMAT0004494	0	-1	59841311	59841330	chr17	+	0	CAACACCAGTCGATGGGCTG	CAACACCAGTCGATGGGCTG	not reported	not reported	not reported	not reported	3.84854e-25	9.60095e-23	21.5064	15.2612	240.926	202.834	16.965	171.466	14.6122	134.629	False	False	True	False	False	False
miR-26a-5p__mir-26a-1__0__-2__20M	hsa-mir-26a-1	MI0000083	hsa-miR-26a-5p	MIMAT0000082	0	-2	37969413	37969432	chr3	+	0	TTCAAGTAATCCAGGATAGG	TTCAAGTAATCCAGGATAGG	not reported	not reported	not reported	not reported	2.68976e-09	6.96285e-09	3320.59	3485.94	1309.11	1248.32	1833.66	1063.12	3018.4	1073.91	False	False	False	True	False	False
miR-141-5p__mir-141__0__-1__21M	hsa-mir-141	MI0000457	hsa-miR-141-5p	MIMAT0004598	0	-1	6964113	6964133	chr12	+	0	CATCTTCCAGTACAGTGTTGG	CATCTTCCAGTACAGTGTTGG	not reported	not reported	not reported	not reported	8.37912e-20	1.35499e-18	111.355	110.145	456.214	466.969	78.4457	355.44	107.478	356.908	False	False	True	False	False	False
miR-223-3p__mir-223__+1__+1__22M	hsa-mir-223	MI0000300	hsa-miR-223-3p	MIMAT0000280	1	1	66018938	66018959	chrX	+	0	GTCAGTTTGTCAAATACCCCAA	GTCAGTTTGTCAAATACCCCAA	not reported	not reported	not reported	not reported	1.28289e-05	2.34857e-05	17.9914	34.6946	9.33271	12.3673	12.3376	6.50204	23.6758	7.288	False	False	False	True	False	False
miR-32-5p__mir-32__0__0__22M	hsa-mir-32	MI0000090	hsa-miR-32-5p	MIMAT0000090	0	0	109046272	109046293	chr9	-	0	TATTGCACATTACTAAGTTGCA	TATTGCACATTACTAAGTTGCA	not reported	not reported	not reported	not reported	0.0160992	0.0212675	1.91871	2.07753	1.44595	1.72608	1.54816	1.21717	1.9213	1.51297	False	False	False	True	False	False
miR-29c-3p__mir-29c__0__0__22M	hsa-mir-29c	MI0000735	hsa-miR-29c-3p	MIMAT0000681	0	0	207801865	207801886	chr1	-	0	TAGCACCATTTGAAATCGGTTA	TAGCACCATTTGAAATCGGTTA	not reported	not reported	not reported	not reported	0.031406	0.0399182	229.977	289.423	235.23	291.627	138.24	179.419	274.324	230.267	False	False	False	False	True	False
miR-30d-5p__mir-30d__0__+1__23M	hsa-mir-30d	MI0000255	hsa-miR-30d-5p	MIMAT0000245	0	1	134804918	134804940	chr8	-	0	TGTAAACATCCCCGACTGGAAGC	TGTAAACATCCCCGACTGGAAGC	not reported	not reported	not reported	not reported	6.99916e-09	1.74718e-08	1530.77	1543.83	955.761	1038.31	1412.36	705.272	1496.06	739.037	False	False	False	True	False	False
miR-146b-5p__mir-146b__+4__+1__20M	hsa-mir-146b	MI0003129	hsa-miR-146b-5p	MIMAT0002809	4	1	102436524	102436543	chr10	+	0	AACTGAATTCCATAGGCTGT	AACTGAATTCCATAGGCTGT	not reported	not reported	not reported	not reported	1.19701e-06	2.39988e-06	2.3315	2.64857	1.77758	1.52116	1.94751	1.19447	2.53503	0.739295	False	False	False	True	False	False
miR-758-5p__mir-758__+1__+1__22M	hsa-mir-758	MI0003757	hsa-miR-758-5p	MIMAT0022929	1	1	101026035	101026056	chr14	+	0	ATGGTTGACCAGAGAGCACACG	ATGGTTGACCAGAGAGCACACG	not reported	not reported	not reported	not reported	0.0293172	0.0374152	3.12707	1.74267	3.82883	1.71972	2.38529	1.82365	1.59338	1.28622	False	True	False	False	False	False
miR-21-5p__mir-21__0__-3__19M	hsa-mir-21	MI0000077	hsa-miR-21-5p	MIMAT0000076	0	-3	59841273	59841291	chr17	+	0	TAGCTTATCAGACTGATGT	TAGCTTATCAGACTGATGT	not reported	not reported	not reported	not reported	1.2707e-17	1.33478e-16	569.769	586.153	1569.98	1241.93	245.508	1363.01	533.539	1040.8	False	False	True	False	False	False
miR-103a-3p__mir-103a-1__+5__0__18M	hsa-mir-103a-1	MI0000109	hsa-miR-103a-3p	MIMAT0000101	5	0	168560904	168560921	chr5	-	0	CATTGTACAGGGCTATGA	CATTGTACAGGGCTATGA	not reported	not reported	not reported	not reported	3.78402e-11	1.21743e-10	12.014	14.1423	5.83966	3.83757	9.8103	3.47504	12.2272	1.96063	False	False	False	True	False	False
miR-210-3p__mir-210__0__-3__19M	hsa-mir-210	MI0000286	hsa-miR-210-3p	MIMAT0000267	0	-3	568115	568133	chr11	-	0	CTGTGCGTGTGACAGCGGC	CTGTGCGTGTGACAGCGGC	not reported	not reported	not reported	not reported	1.0979e-22	3.93005e-21	0.347091	0.219797	11.2789	9.45171	0.287306	6.25353	0.178292	5.59178	False	False	True	False	False	False
miR-30a-5p__mir-30a__+2__0__20M	hsa-mir-30a	MI0000088	hsa-miR-30a-5p	MIMAT0000087	2	0	71403595	71403614	chr6	-	0	TAAACATCCTCGACTGGAAG	TAAACATCCTCGACTGGAAG	not reported	not reported	not reported	not reported	5.35543e-13	2.3876e-12	5.42417	6.48738	1.66825	1.05944	4.09874	1.10803	5.68711	0.888491	False	False	False	True	False	False
miR-361-5p__mir-361__0__-5__17M	hsa-mir-361	MI0000760	hsa-miR-361-5p	MIMAT0000703	0	-5	85903686	85903702	chrX	-	0	TTATCAGAATCTCCAGG	TTATCAGAATCTCCAGG	not reported	not reported	not reported	not reported	8.22405e-05	0.000140771	3.05383	4.3717	5.28345	4.77961	2.72952	4.53383	4.02921	4.14689	False	False	True	False	False	False
miR-1307-3p__mir-1307__+1__-5__16M	hsa-mir-1307	MI0006444	hsa-miR-1307-3p	MIMAT0005951	1	-5	103394306	103394321	chr10	-	0	CTCGGCGTGGCGTCGG	CTCGGCGTGGCGTCGG	not reported	not reported	not reported	not reported	2.02093e-05	3.62588e-05	9.53252	4.78813	10.2671	10.8613	4.04898	7.3559	4.21442	8.41889	False	False	True	False	False	False
miR-675-3p__mir-675__0__+2__22M	hsa-mir-675	MI0005416	hsa-miR-675-3p	MIMAT0006790	0	2	1996766	1996787	chr11	-	0	CTGTATGCCCTCACCGCTCAGC	CTGTATGCCCTCACCGCTCAGC	not reported	not reported	not reported	not reported	0.000216029	0.000351655	7.2349	1.14492	57.2359	47.1621	1.91626	4.2243	1.00512	5.60957	False	False	True	False	False	False
miR-210-3p__mir-210__0__+1__23M	hsa-mir-210	MI0000286	hsa-miR-210-3p	MIMAT0000267	0	1	568111	568133	chr11	-	0	CTGTGCGTGTGACAGCGGCTGAT	CTGTGCGTGTGACAGCGGCTGAT	not reported	not reported	not reported	not reported	6.37123e-24	4.69815e-22	2.53844	0.555257	78.7788	91.2913	1.18894	41.2365	0.497726	55.1462	False	False	True	False	False	False
miR-574-5p__mir-574__0__-2__21M	hsa-mir-574	MI0003581	hsa-miR-574-5p	MIMAT0004795	0	-2	38868056	38868076	chr4	+	0	TGAGTGTGTGTGTGTGAGTGT	TGAGTGTGTGTGTGTGAGTGT	not reported	not reported	not reported	not reported	1.63821e-08	3.95551e-08	4.92795	1.79493	9.71471	11.3928	3.22407	6.83377	1.71642	7.57668	False	False	True	False	False	False
miR-23b-3p__mir-23b__0__+1__24M	hsa-mir-23b	MI0000439	hsa-miR-23b-3p	MIMAT0000418	0	1	95085265	95085288	chr9	+	0	ATCACATTGCCAGGGATTACCACG	ATCACATTGCCAGGGATTACCACG	not reported	not reported	not reported	not reported	0.000917421	0.00139832	2.33761	0.995705	2.8555	2.67503	1.4273	2.21866	0.920458	2.1026	False	False	True	False	False	False
miR-181a-2-3p__mir-181a-2__0__-4__18M	hsa-mir-181a-2	MI0000269	hsa-miR-181a-2-3p	MIMAT0004558	0	-4	124692518	124692535	chr9	+	0	ACCACTGACCGTTGACTG	ACCACTGACCGTTGACTG	not reported	not reported	not reported	not reported	0.0171631	0.0225438	2.70251	3.01122	5.05211	6.59566	2.36602	3.68873	2.86761	3.95025	False	False	True	False	False	False
miR-503-5p__mir-503__0__0__23M	hsa-mir-503	MI0003188	hsa-miR-503-5p	MIMAT0002874	0	0	134546371	134546393	chrX	-	0	TAGCAGCGGGAACAGTTCTGCAG	TAGCAGCGGGAACAGTTCTGCAG	not reported	not reported	not reported	not reported	1.09076e-16	9.83282e-16	0.870833	0.570352	4.97788	7.95509	0.589718	3.3005	0.508388	4.77231	False	False	True	False	False	False
miR-1307-3p__mir-1307__0__-6__16M	hsa-mir-1307	MI0006444	hsa-miR-1307-3p	MIMAT0005951	0	-6	103394307	103394322	chr10	-	0	ACTCGGCGTGGCGTCG	ACTCGGCGTGGCGTCG	not reported	not reported	not reported	not reported	1.49226e-05	2.70899e-05	22.0809	4.42431	15.5519	13.2952	6.04167	10.4696	3.79837	10.7909	False	False	True	False	False	False
miR-103a-3p__mir-103a-1__+1__0__22M	hsa-mir-103a-1	MI0000109	hsa-miR-103a-3p	MIMAT0000101	1	0	168560904	168560925	chr5	-	0	GCAGCATTGTACAGGGCTATGA	GCAGCATTGTACAGGGCTATGA	not reported	not reported	not reported	not reported	0.00660903	0.00917451	14.4528	17.1937	16.3867	13.0433	13.0196	12.4434	16.688	10.4325	False	False	False	True	False	False
miR-7704__mir-7704__0__-3__16M	hsa-mir-7704	MI0025240	hsa-miR-7704	MIMAT0030019	0	-3	176188843	176188858	chr2	+	0	CGGGGTCGGCGGCGAC	CGGGGTCGGCGGCGAC	not reported	not reported	not reported	not reported	1.18128e-11	4.07808e-11	23.9614	4.7952	1.7632	1.31405	6.69489	1.1703	3.20723	0.948478	False	False	False	True	False	False
miR-199a-5p__mir-199a-1__0__-5__18M	hsa-mir-199a-1	MI0000242	hsa-miR-199a-5p	MIMAT0000231	0	-5	10817474	10817491	chr19	-	0	CCCAGTGTTCAGACTACC	CCCAGTGTTCAGACTACC	not reported	not reported	not reported	not reported	0.00818626	0.0111664	0.845896	0.98016	1.98517	2.18535	0.695846	1.32022	0.824683	1.08788	False	False	True	False	False	False
let-7a-5p__let-7a-1__+1__0__21M	hsa-let-7a-1	MI0000060	hsa-let-7a-5p	MIMAT0000062	1	0	94175963	94175983	chr9	+	0	GAGGTAGTAGGTTGTATAGTT	GAGGTAGTAGGTTGTATAGTT	not reported	not reported	not reported	not reported	1.02249e-07	2.27515e-07	7.90457	9.41809	6.16719	4.12066	6.93812	3.80971	8.61395	3.36145	False	False	False	True	False	False
miR-708-3p__mir-708__0__-2__20M	hsa-mir-708	MI0005543	hsa-miR-708-3p	MIMAT0004927	0	-2	79402034	79402053	chr11	-	0	CAACTAGACTGTGAGCTTCT	CAACTAGACTGTGAGCTTCT	not reported	not reported	not reported	not reported	2.11129e-16	1.82731e-15	3.53264	3.08738	15.1351	14.6756	2.6195	11.1653	2.96087	11.7442	False	False	True	False	False	False
miR-19b-1-5p__mir-19b-1__0__-1__22M	hsa-mir-19b-1	MI0000074	hsa-miR-19b-1-5p	MIMAT0004491	0	-1	91351207	91351228	chr13	+	0	AGTTTTGCAGGTTTGCATCCAG	AGTTTTGCAGGTTTGCATCCAG	not reported	not reported	not reported	not reported	7.47089e-16	5.83584e-15	1.8965	2.19052	5.92804	5.50999	1.61979	4.92785	2.08928	5.01672	False	False	True	False	False	False
miR-708-3p__mir-708__0__-1__21M	hsa-mir-708	MI0005543	hsa-miR-708-3p	MIMAT0004927	0	-1	79402033	79402053	chr11	-	0	CAACTAGACTGTGAGCTTCTA	CAACTAGACTGTGAGCTTCTA	not reported	not reported	not reported	not reported	4.01903e-19	5.57074e-18	1.22741	1.16511	6.31071	6.32135	1.05484	5.0004	1.00808	5.38615	False	False	True	False	False	False
miR-375-3p__mir-375__-1__-2__21M	hsa-mir-375	MI0000783	hsa-miR-375-3p	MIMAT0000728	-1	-2	219001650	219001670	chr2	-	0	TTTTGTTCGTTCGGCTCGCGT	TTTTGTTCGTTCGGCTCGCGT	not reported	not reported	not reported	not reported	0.00682817	0.00943608	17.8967	10.3665	38.3735	40.4347	9.61741	15.6671	10.0424	17.7579	False	False	True	False	False	False
miR-148a-3p__mir-148a__0__-5__17M	hsa-mir-148a	MI0000253	hsa-miR-148a-3p	MIMAT0000243	0	-5	25949927	25949943	chr7	-	0	TCAGTGCACTACAGAAC	TCAGTGCACTACAGAAC	not reported	not reported	not reported	not reported	1.86793e-07	4.03696e-07	44.8621	53.2892	46.9469	54.5508	8.8799	22.3105	16.6324	30.6235	False	False	True	False	False	False
miR-335-3p__mir-335__-1__0__23M	hsa-mir-335	MI0000816	hsa-miR-335-3p	MIMAT0004703	-1	0	130496161	130496183	chr7	+	0	GTTTTTCATTATTGCTCCTGACC	GTTTTTCATTATTGCTCCTGACC	not reported	not reported	not reported	not reported	0.000162016	0.000267871	4.18006	4.47984	8.15973	7.54775	3.29151	6.3038	3.99618	6.39163	False	False	True	False	False	False
miR-200c-3p__mir-200c__0__0__23M	hsa-mir-200c	MI0000650	hsa-miR-200c-3p	MIMAT0000617	0	0	6963742	6963764	chr12	+	0	TAATACTGCCGGGTAATGATGGA	TAATACTGCCGGGTAATGATGGA	not reported	not reported	not reported	not reported	7.08096e-05	0.000121713	3277.11	2278.39	4679.55	5138.36	2673.95	3781.17	2180.59	3949.23	False	False	True	False	False	False
miR-29c-3p__mir-29c__0__+1__23M	hsa-mir-29c	MI0000735	hsa-miR-29c-3p	MIMAT0000681	0	1	207801864	207801886	chr1	-	0	TAGCACCATTTGAAATCGGTTAT	TAGCACCATTTGAAATCGGTTAT	not reported	not reported	not reported	not reported	0.00433706	0.00616689	6.12515	7.26663	6.83191	9.13606	4.51974	4.83237	6.75529	7.30279	True	False	False	False	False	False
miR-21-3p__mir-21__0__-3__18M	hsa-mir-21	MI0000077	hsa-miR-21-3p	MIMAT0004494	0	-3	59841311	59841328	chr17	+	0	CAACACCAGTCGATGGGC	CAACACCAGTCGATGGGC	not reported	not reported	not reported	not reported	4.6721e-22	1.36715e-20	0.626453	0.55256	7.76277	7.9182	0.457498	4.7009	0.501962	4.11593	False	False	True	False	False	False
miR-29c-3p__mir-29c__-1__-3__20M	hsa-mir-29c	MI0000735	hsa-miR-29c-3p	MIMAT0000681	-1	-3	207801868	207801887	chr1	-	0	CTAGCACCATTTGAAATCGG	CTAGCACCATTTGAAATCGG	not reported	not reported	not reported	not reported	8.37189e-07	1.69507e-06	7.64257	7.73239	3.96856	3.87957	5.63964	3.03147	7.39664	3.14297	False	False	False	True	False	False
miR-423-3p__mir-423__-1__-3__21M	hsa-mir-423	MI0001445	hsa-miR-423-3p	MIMAT0001340	-1	-3	30117130	30117150	chr17	+	0	AAGCTCGGTCTGAGGCCCCTC	AAGCTCGGTCTGAGGCCCCTC	not reported	not reported	not reported	not reported	0.00155514	0.00231762	2.34249	0.811472	1.65878	1.50507	1.23562	1.4305	0.638802	1.27484	False	False	True	False	False	False
miR-200c-5p__mir-200c__0__-1__21M	hsa-mir-200c	MI0000650	hsa-miR-200c-5p	MIMAT0004657	0	-1	6963703	6963723	chr12	+	0	CGTCTTACCCAGCAGTGTTTG	CGTCTTACCCAGCAGTGTTTG	not reported	not reported	not reported	not reported	2.92634e-08	6.8898e-08	1.21411	0.867654	3.26226	3.71073	1.02296	2.52986	0.80042	2.44208	False	False	True	False	False	False
let-7g-5p__let-7g__+3__0__19M	hsa-let-7g	MI0000433	hsa-let-7g-5p	MIMAT0000414	3	0	52268336	52268354	chr3	-	0	GGTAGTAGTTTGTACAGTT	GGTAGTAGTTTGTACAGTT	not reported	not reported	not reported	not reported	0.016221	0.0214054	1.59988	1.09643	2.42505	2.06694	1.27219	1.86731	1.0385	1.49234	False	False	True	False	False	False
miR-146a-5p__mir-146a__0__-3__19M	hsa-mir-146a	MI0000477	hsa-miR-146a-5p	MIMAT0000449	0	-3	160485372	160485390	chr5	+	0	TGAGAACTGAATTCCATGG	TGAGAACTGAATTCCATGG	not reported	not reported	not reported	not reported	2.67439e-05	4.73834e-05	4.00457	6.3374	2.77696	2.19156	3.09799	1.93142	5.7958	1.66966	False	False	False	True	False	False
miR-34a-5p__mir-34a__0__-4__18M	hsa-mir-34a	MI0000268	hsa-miR-34a-5p	MIMAT0000255	0	-4	9151739	9151756	chr1	-	0	TGGCAGTGTCTTAGCTGG	TGGCAGTGTCTTAGCTGG	not reported	not reported	not reported	not reported	4.72123e-11	1.50191e-10	1.0843	0.782142	2.74581	2.86848	0.913137	2.33279	0.702816	2.31319	False	False	True	False	False	False
let-7e-5p__let-7e__0__-1__21M	hsa-let-7e	MI0000066	hsa-let-7e-5p	MIMAT0000066	0	-1	51692793	51692813	chr19	+	0	TGAGGTAGGAGGTTGTATAGT	TGAGGTAGGAGGTTGTATAGT	not reported	not reported	not reported	not reported	9.49837e-14	5.01726e-13	923.514	982.951	369.987	343.765	769.916	276.981	966.153	293.902	False	False	False	True	False	False
miR-128-3p__mir-128-1__0__0__21M	hsa-mir-128-1	MI0000447	hsa-miR-128-3p	MIMAT0000424	0	0	135665446	135665466	chr2	+	0	TCACAGTGAACCGGTCTCTTT	TCACAGTGAACCGGTCTCTTT	not reported	not reported	not reported	not reported	8.7789e-09	2.16382e-08	46.7086	60.6698	78.5189	97.6638	42.8518	68.6158	59.4609	86.9016	False	False	True	False	False	False
miR-451a__mir-451a__0__-5__17M	hsa-mir-451a	MI0001729	hsa-miR-451a	MIMAT0001631	0	-5	28861408	28861424	chr17	-	0	AAACCGTTACCATTACT	AAACCGTTACCATTACT	not reported	not reported	not reported	not reported	2.84628e-08	6.70987e-08	16.025	26.2651	2.86508	4.38326	7.11534	1.79398	11.5502	2.22721	False	False	False	True	False	False
miR-17-5p__mir-17__0__+1__24M	hsa-mir-17	MI0000071	hsa-miR-17-5p	MIMAT0000070	0	1	91350618	91350641	chr13	+	0	CAAAGTGCTTACAGTGCAGGTAGT	CAAAGTGCTTACAGTGCAGGTAGT	not reported	not reported	not reported	not reported	3.22505e-15	2.2606e-14	0.733394	1.29261	4.82466	4.84563	0.626744	3.16101	1.22204	3.67467	False	False	True	False	False	False
miR-15b-3p__mir-15b__0__-1__21M	hsa-mir-15b	MI0000438	hsa-miR-15b-3p	MIMAT0004586	0	-1	160404645	160404665	chr3	+	0	CGAATCATTATTTGCTGCTCT	CGAATCATTATTTGCTGCTCT	not reported	not reported	not reported	not reported	0.000235518	0.000382367	8.69049	13.5753	14.2025	16.518	6.53323	11.845	12.1789	13.8753	True	False	False	False	False	False
miR-30a-3p__mir-30a__0__-4__18M	hsa-mir-30a	MI0000088	hsa-miR-30a-3p	MIMAT0000088	0	-4	71403558	71403575	chr6	-	0	CTTTCAGTCGGATGTTTG	CTTTCAGTCGGATGTTTG	not reported	not reported	not reported	not reported	1.76939e-16	1.54591e-15	159.777	149.388	34.7401	35.9289	110.992	23.1909	146.406	17.4424	False	False	False	True	False	False
miR-17-5p__mir-17__-1__-2__22M	hsa-mir-17	MI0000071	hsa-miR-17-5p	MIMAT0000070	-1	-2	91350617	91350638	chr13	+	0	TCAAAGTGCTTACAGTGCAGGT	TCAAAGTGCTTACAGTGCAGGT	not reported	not reported	not reported	not reported	8.68765e-08	1.94838e-07	0.671629	0.689319	1.76744	1.79412	0.573527	1.44571	0.598941	1.39688	False	False	True	False	False	False
miR-374b-5p__mir-374b__0__-1__21M	hsa-mir-374b	MI0005566	hsa-miR-374b-5p	MIMAT0004955	0	-1	74218588	74218608	chrX	-	0	ATATAATACAACCTGCTAAGT	ATATAATACAACCTGCTAAGT	not reported	not reported	not reported	not reported	8.95613e-12	3.14059e-11	65.1854	90.2035	23.6328	27.7871	36.1543	21.2966	88.9983	25.0178	False	False	False	True	False	False
miR-493-5p__mir-493__0__0__22M	hsa-mir-493	MI0003132	hsa-miR-493-5p	MIMAT0002813	0	0	100869075	100869096	chr14	+	0	TTGTACATGGTAGGCTTTCATT	TTGTACATGGTAGGCTTTCATT	not reported	not reported	not reported	not reported	0.000677934	0.00104935	1.98548	1.5239	5.59503	3.37797	1.59603	3.07264	1.43582	2.86328	False	False	True	False	False	False
miR-106b-3p__mir-106b__0__0__22M	hsa-mir-106b	MI0000734	hsa-miR-106b-3p	MIMAT0004672	0	0	100094002	100094023	chr7	-	0	CCGCACTGTGGGTACTTGCTGC	CCGCACTGTGGGTACTTGCTGC	not reported	not reported	not reported	not reported	0.00177456	0.00262657	7.17629	7.448	6.1467	6.63367	6.55598	4.24833	6.92931	4.63689	False	False	False	True	False	False
miR-375-3p__mir-375__-1__-6__17M	hsa-mir-375	MI0000783	hsa-miR-375-3p	MIMAT0000728	-1	-6	219001654	219001670	chr2	-	0	TTTTGTTCGTTCGGCTC	TTTTGTTCGTTCGGCTC	not reported	not reported	not reported	not reported	1.98955e-13	9.74166e-13	6.20086	4.70106	56.0952	56.4589	3.99155	20.3644	4.60166	19.263	False	False	True	False	False	False
miR-212-3p__mir-212__0__-2__19M	hsa-mir-212	MI0000288	hsa-miR-212-3p	MIMAT0000269	0	-2	2050292	2050310	chr17	-	0	TAACAGTCTCCAGTCACGG	TAACAGTCTCCAGTCACGG	not reported	not reported	not reported	not reported	0.0107895	0.0145345	3.04423	2.82834	5.51969	4.24642	2.15668	3.77489	2.5586	3.2963	False	False	True	False	False	False
miR-142-3p__mir-142__+1__-2__20M	hsa-mir-142	MI0000458	hsa-miR-142-3p	MIMAT0000434	1	-2	58331247	58331266	chr17	-	0	GTAGTGTTTCCTACTTTATG	GTAGTGTTTCCTACTTTATG	not reported	not reported	not reported	not reported	3.41355e-12	1.30422e-11	35.375	33.4072	165.749	124.437	18.9999	98.0096	31.9804	86.1752	False	False	True	False	False	False
miR-9-5p__mir-9-1__+1__-2__20M	hsa-mir-9-1	MI0000466	hsa-miR-9-5p	MIMAT0000441	1	-2	156420394	156420413	chr1	-	0	CTTTGGTTATCTAGCTGTAT	CTTTGGTTATCTAGCTGTAT	not reported	not reported	not reported	not reported	9.97375e-10	2.73407e-09	0.123935	0	4.70163	3.7552	0.0848264	1.25881	0	1.23154	False	False	True	False	False	False
miR-542-3p__mir-542__0__0__22M	hsa-mir-542	MI0003686	hsa-miR-542-3p	MIMAT0003389	0	0	134541364	134541385	chrX	-	0	TGTGACAGATTGATAACTGAAA	TGTGACAGATTGATAACTGAAA	not reported	not reported	not reported	not reported	0.00010287	0.000174221	34.8357	49.7767	72.7749	98.7249	22.8251	53.4133	44.4758	63.7778	False	False	True	False	False	False
miR-200a-3p__mir-200a__0__-2__20M	hsa-mir-200a	MI0000737	hsa-miR-200a-3p	MIMAT0000682	0	-2	1167916	1167935	chr1	+	0	TAACACTGTCTGGTAACGAT	TAACACTGTCTGGTAACGAT	not reported	not reported	not reported	not reported	1.99378e-06	3.93316e-06	2.61231	2.94313	9.3579	7.4909	2.08173	5.43977	2.75686	5.19651	False	False	True	False	False	False
let-7b-5p__let-7b__0__-1__21M	hsa-let-7b	MI0000063	hsa-let-7b-5p	MIMAT0000063	0	-1	46113691	46113711	chr22	+	0	TGAGGTAGTAGGTTGTGTGGT	TGAGGTAGTAGGTTGTGTGGT	not reported	not reported	not reported	not reported	6.94869e-16	5.45103e-15	5456.17	4090.74	2033.34	1779.1	3815.56	1699.96	3842.77	1556.41	False	False	False	True	False	False
miR-652-3p__mir-652__0__0__21M	hsa-mir-652	MI0003667	hsa-miR-652-3p	MIMAT0003322	0	0	110055389	110055409	chrX	+	0	AATGGCGCCACTAGGGTTGTG	AATGGCGCCACTAGGGTTGTG	not reported	not reported	not reported	not reported	3.74674e-06	7.21747e-06	40.5986	43.5114	29.6982	25.0739	34.4347	24.8678	42.1044	21.9174	False	False	False	True	False	False
miR-423-5p__mir-423__0__-3__20M	hsa-mir-423	MI0001445	hsa-miR-423-5p	MIMAT0004748	0	-3	30117095	30117114	chr17	+	0	TGAGGGGCAGAGAGCGAGAC	TGAGGGGCAGAGAGCGAGAC	not reported	not reported	not reported	not reported	5.05419e-12	1.85605e-11	15.2263	4.77425	3.00408	2.36593	7.79373	2.24338	4.5964	1.91464	False	False	False	True	False	False
miR-29c-5p__mir-29c__0__-1__21M	hsa-mir-29c	MI0000735	hsa-miR-29c-5p	MIMAT0004673	0	-1	207801904	207801924	chr1	-	0	TGACCGATTTCTCCTGGTGTT	TGACCGATTTCTCCTGGTGTT	not reported	not reported	not reported	not reported	0.0167204	0.0220251	3.20576	2.74259	4.94586	4.75241	2.99433	3.9708	2.68806	4.07432	False	False	True	False	False	False
miR-193b-3p__mir-193b__0__-1__21M	hsa-mir-193b	MI0003137	hsa-miR-193b-3p	MIMAT0002819	0	-1	14304017	14304037	chr16	+	0	AACTGGCCCTCAAAGTCCCGC	AACTGGCCCTCAAAGTCCCGC	not reported	not reported	not reported	not reported	7.51841e-11	2.33337e-10	4.3386	2.37796	10.958	16.215	2.93765	7.21408	2.24661	10.6901	False	False	True	False	False	False
miR-1307-5p__mir-1307__0__0__21M	hsa-mir-1307	MI0006444	hsa-miR-1307-5p	MIMAT0022727	0	0	103394341	103394361	chr10	-	0	TCGACCGGACCTCGACCGGCT	TCGACCGGACCTCGACCGGCT	not reported	not reported	not reported	not reported	2.88846e-18	3.47197e-17	48.7901	50.7002	264.348	296.263	28.8215	174.961	45.9813	229.518	False	False	True	False	False	False
miR-375-3p__mir-375__+1__0__21M	hsa-mir-375	MI0000783	hsa-miR-375-3p	MIMAT0000728	1	0	219001648	219001668	chr2	-	0	TTGTTCGTTCGGCTCGCGTGA	TTGTTCGTTCGGCTCGCGTGA	not reported	not reported	not reported	not reported	0.00206438	0.00303242	339.581	182.205	829.036	872.693	187.711	306.657	170.317	323.856	False	False	True	False	False	False
miR-1307-3p__mir-1307__+1__-4__17M	hsa-mir-1307	MI0006444	hsa-miR-1307-3p	MIMAT0005951	1	-4	103394305	103394321	chr10	-	0	CTCGGCGTGGCGTCGGT	CTCGGCGTGGCGTCGGT	not reported	not reported	not reported	not reported	5.15754e-05	8.95713e-05	0.787303	0.623897	1.54863	1.8832	0.459123	1.05354	0.553004	1.42158	False	False	True	False	False	False
miR-629-3p__mir-629__0__-1__21M	hsa-mir-629	MI0003643	hsa-miR-629-3p	MIMAT0003298	0	-1	70079388	70079408	chr15	-	0	GTTCTCCCAACGTAAGCCCAG	GTTCTCCCAACGTAAGCCCAG	not reported	not reported	not reported	not reported	6.09462e-14	3.44645e-13	1.37229	0.234105	4.16962	4.09979	0.623069	2.67703	0.218887	3.28918	False	False	True	False	False	False
miR-320a-3p__mir-320a__+1__0__21M	hsa-mir-320a	MI0000542	hsa-miR-320a-3p	MIMAT0000510	1	0	22244975	22244995	chr8	-	0	AAAGCTGGGTTGAGAGGGCGA	AAAGCTGGGTTGAGAGGGCGA	not reported	not reported	not reported	not reported	0.023982	0.0308627	15.6532	11.1835	13.3702	11.5684	14.3303	11.2542	10.6078	10.2258	False	True	False	False	False	False
let-7i-5p__let-7i__+3__+1__20M	hsa-let-7i	MI0000434	hsa-let-7i-5p	MIMAT0000415	3	1	62603694	62603713	chr12	+	0	GGTAGTAGTTTGTGCTGTTG	GGTAGTAGTTTGTGCTGTTG	not reported	not reported	not reported	not reported	0.0010311	0.00156127	1.91781	1.65436	1.78219	1.4776	1.73424	1.32168	1.54505	0.952338	False	False	False	True	False	False
miR-30a-3p__mir-30a__+1__-3__18M	hsa-mir-30a	MI0000088	hsa-miR-30a-3p	MIMAT0000088	1	-3	71403557	71403574	chr6	-	0	TTTCAGTCGGATGTTTGC	TTTCAGTCGGATGTTTGC	not reported	not reported	not reported	not reported	5.0531e-14	2.89748e-13	207.799	190.367	59.3195	65.7769	152.936	27.5698	171.186	28.9611	False	False	False	True	False	False
miR-130a-3p__mir-130a__0__-4__18M	hsa-mir-130a	MI0000448	hsa-miR-130a-3p	MIMAT0000425	0	-4	57641252	57641269	chr11	+	0	CAGTGCAATGTTAAAAGG	CAGTGCAATGTTAAAAGG	not reported	not reported	not reported	not reported	0.00386505	0.00551675	0.519729	0.67403	1.71756	1.56195	0.451699	1.06804	0.643649	1.10589	False	False	True	False	False	False
miR-10399-5p__mir-10399__+2__+2__21M	hsa-mir-10399	MI0033423	hsa-miR-10399-5p	MIMAT0041629	2	2	139044135	139044155	chr7	-	0	TTACAGATTGTCTCAGAGAAA	TTACAGATTGTCTCAGAGAAA	not reported	not reported	not reported	not reported	7.51255e-07	1.53032e-06	7.46287	8.81025	3.72133	3.11671	5.19741	2.91124	8.0011	2.69022	False	False	False	True	False	False
miR-21-5p__mir-21__+1__-1__20M	hsa-mir-21	MI0000077	hsa-miR-21-5p	MIMAT0000076	1	-1	59841274	59841293	chr17	+	0	AGCTTATCAGACTGATGTTG	AGCTTATCAGACTGATGTTG	not reported	not reported	not reported	not reported	3.46566e-22	1.07377e-20	4.97383	6.60707	25.1508	17.7316	3.53863	19.261	6.53748	15.3284	False	False	True	False	False	False
miR-1307-5p__mir-1307__0__-3__18M	hsa-mir-1307	MI0006444	hsa-miR-1307-5p	MIMAT0022727	0	-3	103394344	103394361	chr10	-	0	TCGACCGGACCTCGACCG	TCGACCGGACCTCGACCG	not reported	not reported	not reported	not reported	1.42557e-12	5.83361e-12	0.527823	0.441335	2.5719	3.00415	0.423687	1.79261	0.412488	1.9237	False	False	True	False	False	False
miR-125a-5p__mir-125a__0__-6__18M	hsa-mir-125a	MI0000469	hsa-miR-125a-5p	MIMAT0000443	0	-6	51693268	51693285	chr19	+	0	TCCCTGAGACCCTTTAAC	TCCCTGAGACCCTTTAAC	not reported	not reported	not reported	not reported	1.92355e-05	3.46127e-05	2.81026	1.8647	1.60914	2.82902	2.22312	1.15588	1.81745	1.31939	False	False	False	True	False	False
miR-21-3p__mir-21__0__-5__16M	hsa-mir-21	MI0000077	hsa-miR-21-3p	MIMAT0004494	0	-5	59841311	59841326	chr17	+	0	CAACACCAGTCGATGG	CAACACCAGTCGATGG	not reported	not reported	not reported	not reported	1.03007e-19	1.637e-18	15.7329	12.133	93.6211	47.4878	11.4424	56.4411	10.3169	25.249	False	False	True	False	False	False
miR-21-5p__mir-21__+3__+2__21M	hsa-mir-21	MI0000077	hsa-miR-21-5p	MIMAT0000076	3	2	59841276	59841296	chr17	+	0	CTTATCAGACTGATGTTGACT	CTTATCAGACTGATGTTGACT	not reported	not reported	not reported	not reported	1.55135e-22	5.24753e-21	0.393275	0.417806	10.1926	7.61894	0.28695	5.46841	0.393432	4.96807	False	False	True	False	False	False
let-7b-3p__let-7b__0__-2__20M	hsa-let-7b	MI0000063	hsa-let-7b-3p	MIMAT0004482	0	-2	46113745	46113764	chr22	+	0	CTATACAACCTACTGCCTTC	CTATACAACCTACTGCCTTC	not reported	not reported	not reported	not reported	1.13403e-10	3.44981e-10	10.8157	8.67256	4.94273	4.50335	8.82491	4.13581	8.157	3.63005	False	False	False	True	False	False
miR-127-3p__mir-127__0__-1__21M	hsa-mir-127	MI0000472	hsa-miR-127-3p	MIMAT0000446	0	-1	100883035	100883055	chr14	+	0	TCGGATCCGTCTGAGCTTGGC	TCGGATCCGTCTGAGCTTGGC	not reported	not reported	not reported	not reported	0.000511616	0.000802351	204.949	153.633	172.079	96.6599	157.878	91.1294	131.549	76.3437	False	False	False	True	False	False
miR-17-5p__mir-17__0__-4__19M	hsa-mir-17	MI0000071	hsa-miR-17-5p	MIMAT0000070	0	-4	91350618	91350636	chr13	+	0	CAAAGTGCTTACAGTGCAG	CAAAGTGCTTACAGTGCAG	not reported	not reported	not reported	not reported	4.41776e-05	7.70861e-05	1.14029	2.46356	2.42138	2.2685	0.911518	1.97799	1.85572	1.77322	False	False	False	False	True	False
miR-30a-3p__mir-30a__+2__0__20M	hsa-mir-30a	MI0000088	hsa-miR-30a-3p	MIMAT0000088	2	0	71403554	71403573	chr6	-	0	TTCAGTCGGATGTTTGCAGC	TTCAGTCGGATGTTTGCAGC	not reported	not reported	not reported	not reported	1.08696e-19	1.70537e-18	47.9938	42.6352	9.20587	4.78529	34.8305	5.2343	38.0353	3.44611	False	False	False	True	False	False
miR-101-3p__mir-101-1__0__-3__18M	hsa-mir-101-1	MI0000103	hsa-miR-101-3p	MIMAT0000099	0	-3	65058445	65058462	chr1	-	0	TACAGTACTGTGATAACT	TACAGTACTGTGATAACT	not reported	not reported	not reported	not reported	0.000306987	0.0004919	69.0571	84.6052	55.8378	74.1678	37.6213	43.4967	82.25	46.0756	False	False	False	False	True	False
miR-508-3p__mir-508__0__-6__17M	hsa-mir-508	MI0003195	hsa-miR-508-3p	MIMAT0002880	0	-6	147236951	147236967	chrX	-	0	TGATTGTAGCCTTTTGG	TGATTGTAGCCTTTTGG	not reported	not reported	not reported	not reported	0.0341755	0.043271	0.775105	0.556585	4.64949	3.07124	0.511424	1.19484	0.492132	1.34342	False	False	True	False	False	False
miR-200c-3p__mir-200c__0__-4__19M	hsa-mir-200c	MI0000650	hsa-miR-200c-3p	MIMAT0000617	0	-4	6963742	6963760	chr12	+	0	TAATACTGCCGGGTAATGA	TAATACTGCCGGGTAATGA	not reported	not reported	not reported	not reported	0.000653808	0.00101413	27.6906	18.9361	44.6772	38.8602	24.5558	33.6565	17.4251	25.9611	False	False	True	False	False	False
miR-29c-3p__mir-29c__-1__-2__21M	hsa-mir-29c	MI0000735	hsa-miR-29c-3p	MIMAT0000681	-1	-2	207801867	207801887	chr1	-	0	CTAGCACCATTTGAAATCGGT	CTAGCACCATTTGAAATCGGT	not reported	not reported	not reported	not reported	0.000618619	0.000962383	2.29171	3.15068	1.57957	2.01647	1.85448	1.32237	2.96926	1.67216	False	False	False	True	False	False
miR-26a-5p__mir-26a-1__0__-1__21M	hsa-mir-26a-1	MI0000083	hsa-miR-26a-5p	MIMAT0000082	0	-1	37969413	37969433	chr3	+	0	TTCAAGTAATCCAGGATAGGC	TTCAAGTAATCCAGGATAGGC	not reported	not reported	not reported	not reported	3.36572e-09	8.6658e-09	367.901	420.348	170.852	187.516	255.882	148.443	364.104	161.228	False	False	False	True	False	False
miR-505-3p__mir-505__0__0__22M	hsa-mir-505	MI0003190	hsa-miR-505-3p	MIMAT0002876	0	0	139924160	139924181	chrX	-	0	CGTCAACACTTGCTGGTTTCCT	CGTCAACACTTGCTGGTTTCCT	not reported	not reported	not reported	not reported	2.35248e-10	6.91124e-10	3.91038	1.93808	7.17914	7.12955	2.66666	5.92008	1.83671	6.13302	False	False	True	False	False	False
miR-148a-3p__mir-148a__-1__-1__22M	hsa-mir-148a	MI0000253	hsa-miR-148a-3p	MIMAT0000243	-1	-1	25949923	25949944	chr7	-	0	GTCAGTGCACTACAGAACTTTG	GTCAGTGCACTACAGAACTTTG	not reported	not reported	not reported	not reported	9.68493e-18	1.03502e-16	0.529921	0.688495	2.75049	3.53117	0.46833	2.23395	0.581272	2.84665	False	False	True	False	False	False
miR-151a-3p__mir-151a__0__+1__22M	hsa-mir-151a	MI0000809	hsa-miR-151a-3p	MIMAT0000757	0	1	140732586	140732607	chr8	-	0	CTAGACTGAAGCTCCTTGAGGA	CTAGACTGAAGCTCCTTGAGGA	not reported	not reported	not reported	not reported	0.000966083	0.00146643	569.151	670.266	474.379	467.926	457.682	413.103	666.637	426.272	False	False	False	True	False	False
miR-200c-3p__mir-200c__-1__-2__22M	hsa-mir-200c	MI0000650	hsa-miR-200c-3p	MIMAT0000617	-1	-2	6963741	6963762	chr12	+	0	CTAATACTGCCGGGTAATGATG	CTAATACTGCCGGGTAATGATG	not reported	not reported	not reported	not reported	2.95922e-13	1.394e-12	6.01049	3.89623	15.1464	16.9865	5.1041	12.0399	3.83595	12.9366	False	False	True	False	False	False
miR-151a-5p__mir-151a__0__0__21M	hsa-mir-151a	MI0000809	hsa-miR-151a-5p	MIMAT0004697	0	0	140732623	140732643	chr8	-	0	TCGAGGAGCTCACAGTCTAGT	TCGAGGAGCTCACAGTCTAGT	not reported	not reported	not reported	not reported	0.000188325	0.00030819	148.621	149.107	193.939	213.656	137.399	176.68	139.093	197.706	False	False	True	False	False	False
miR-30c-5p__mir-30c-1__0__-6__17M	hsa-mir-30c-1	MI0000736	hsa-miR-30c-5p	MIMAT0000244	0	-6	40757300	40757316	chr1	+	0	TGTAAACATCCTACACT	TGTAAACATCCTACACT	not reported	not reported	not reported	not reported	0.0190119	0.0248042	4.97872	6.81789	3.33167	4.75483	3.41599	2.59442	4.89384	3.60617	False	False	False	True	False	False
miR-889-3p__mir-889__0__0__21M	hsa-mir-889	MI0005540	hsa-miR-889-3p	MIMAT0004921	0	0	101047949	101047969	chr14	+	0	TTAATATCGGACAACCATTGT	TTAATATCGGACAACCATTGT	not reported	not reported	not reported	not reported	0.0203155	0.0263744	3.68349	4.12899	11.5606	10.1923	2.79276	5.24066	3.13834	5.54146	False	False	True	False	False	False
miR-221-3p__mir-221__0__-4__19M	hsa-mir-221	MI0000298	hsa-miR-221-3p	MIMAT0000278	0	-4	45746184	45746202	chrX	-	0	AGCTACATTGTCTGCTGGG	AGCTACATTGTCTGCTGGG	not reported	not reported	not reported	not reported	0.00046594	0.000733527	100.055	113.39	80.5759	57.4658	76.6389	56.4941	98.0745	44.215	False	False	False	True	False	False
miR-452-5p__mir-452__+3__+1__20M	hsa-mir-452	MI0001733	hsa-miR-452-5p	MIMAT0001635	3	1	151959677	151959696	chrX	-	0	TGTTTGCAGAGGAAACTGAG	TGTTTGCAGAGGAAACTGAG	not reported	not reported	not reported	not reported	0.00631214	0.00879549	8.31264	8.36006	6.72459	5.65469	5.14886	4.25046	6.60843	3.12537	False	False	False	True	False	False
let-7e-5p__let-7e__0__-3__19M	hsa-let-7e	MI0000066	hsa-let-7e-5p	MIMAT0000066	0	-3	51692793	51692811	chr19	+	0	TGAGGTAGGAGGTTGTATA	TGAGGTAGGAGGTTGTATA	not reported	not reported	not reported	not reported	5.21396e-12	1.90902e-11	51.2597	47.9113	15.8317	15.0603	36.713	10.3769	45.9175	11.3863	False	False	False	True	False	False
miR-203a-3p__mir-203a__0__-5__17M	hsa-mir-203a	MI0000283	hsa-miR-203a-3p	MIMAT0000264	0	-5	104117469	104117485	chr14	+	0	GTGAAATGTTTAGGACC	GTGAAATGTTTAGGACC	not reported	not reported	not reported	not reported	6.72923e-06	1.26199e-05	60.5523	61.5097	268.947	412.363	33.2533	111.341	52.2102	145.863	False	False	True	False	False	False
let-7c-5p__let-7c__-1__-2__21M	hsa-let-7c	MI0000064	hsa-let-7c-5p	MIMAT0000064	-1	-2	16539837	16539857	chr21	+	0	TTGAGGTAGTAGGTTGTATGG	TTGAGGTAGTAGGTTGTATGG	not reported	not reported	not reported	not reported	2.31754e-16	1.98715e-15	11.8158	8.17048	4.30051	4.58495	10.3144	3.37163	7.90056	3.64054	False	False	False	True	False	False
miR-539-5p__mir-539__0__0__22M	hsa-mir-539	MI0003514	hsa-miR-539-5p	MIMAT0003163	0	0	101047329	101047350	chr14	+	0	GGAGAAATTATCCTTGGTGTGT	GGAGAAATTATCCTTGGTGTGT	not reported	not reported	not reported	not reported	1.03891e-10	3.17617e-10	0.424253	0.222924	2.81424	1.96164	0.22295	1.17997	0.200513	0.948974	False	False	True	False	False	False
let-7e-3p__let-7e__0__0__22M	hsa-let-7e	MI0000066	hsa-let-7e-3p	MIMAT0004485	0	0	51692838	51692859	chr19	+	0	CTATACGGCCTCCTAGCTTTCC	CTATACGGCCTCCTAGCTTTCC	not reported	not reported	not reported	not reported	0.00142472	0.00213187	14.1986	7.39722	6.28529	5.67477	9.35555	5.19296	7.09074	5.18561	False	False	False	True	False	False
miR-375-3p__mir-375__-1__-4__19M	hsa-mir-375	MI0000783	hsa-miR-375-3p	MIMAT0000728	-1	-4	219001652	219001670	chr2	-	0	TTTTGTTCGTTCGGCTCGC	TTTTGTTCGTTCGGCTCGC	not reported	not reported	not reported	not reported	1.32577e-08	3.23502e-08	3.39508	3.30744	23.4773	28.7271	2.40986	8.61067	3.04181	9.43533	False	False	True	False	False	False
miR-192-5p__mir-192__0__+1__22M	hsa-mir-192	MI0000234	hsa-miR-192-5p	MIMAT0000222	0	1	64891202	64891223	chr11	-	0	CTGACCTATGAATTGACAGCCA	CTGACCTATGAATTGACAGCCA	not reported	not reported	not reported	not reported	4.87782e-13	2.19056e-12	27.7745	12.6473	141.322	56.5666	9.7783	37.2869	12.2583	22.9895	False	False	True	False	False	False
miR-652-3p__mir-652__0__-5__16M	hsa-mir-652	MI0003667	hsa-miR-652-3p	MIMAT0003322	0	-5	110055389	110055404	chrX	+	0	AATGGCGCCACTAGGG	AATGGCGCCACTAGGG	not reported	not reported	not reported	not reported	0.017225	0.022609	2.19414	2.76712	1.88065	1.23735	1.76086	1.46716	2.33364	1.08399	False	False	False	True	False	False
miR-181a-5p__mir-181a-1__+1__-3__19M	hsa-mir-181a-1	MI0000289	hsa-miR-181a-5p	MIMAT0000256	1	-3	198859111	198859129	chr1	-	0	ACATTCAACGCTGTCGGTG	ACATTCAACGCTGTCGGTG	not reported	not reported	not reported	not reported	0.0306593	0.0390469	1.69684	0.999083	2.90927	2.40378	1.34379	2.01525	0.975706	1.57497	False	False	True	False	False	False
miR-21-5p__mir-21__0__+1__23M	hsa-mir-21	MI0000077	hsa-miR-21-5p	MIMAT0000076	0	1	59841273	59841295	chr17	+	0	TAGCTTATCAGACTGATGTTGAC	TAGCTTATCAGACTGATGTTGAC	not reported	not reported	not reported	not reported	4.15681e-22	1.24603e-20	7130.48	8461.68	42898.1	43395.7	3190.2	31456.9	7674.08	33937.9	False	False	True	False	False	False
miR-143-3p__mir-143__-1__0__22M	hsa-mir-143	MI0000459	hsa-miR-143-3p	MIMAT0000435	-1	0	149428977	149428998	chr5	+	0	CTGAGATGAAGCACTGTAGCTC	CTGAGATGAAGCACTGTAGCTC	not reported	not reported	not reported	not reported	5.79417e-15	3.8842e-14	223.107	236.054	41.2431	35.8598	140.092	25.9838	226.036	26.5702	False	False	False	True	False	False
let-7i-5p__let-7i__0__-4__18M	hsa-let-7i	MI0000434	hsa-let-7i-5p	MIMAT0000415	0	-4	62603691	62603708	chr12	+	0	TGAGGTAGTAGTTTGTGC	TGAGGTAGTAGTTTGTGC	not reported	not reported	not reported	not reported	0.000181834	0.000298495	2.49088	3.44982	2.55245	3.93034	2.16576	1.68132	3.3013	1.94095	False	False	False	True	False	False
miR-191-5p__mir-191__0__-5__18M	hsa-mir-191	MI0000465	hsa-miR-191-5p	MIMAT0000440	0	-5	49020677	49020694	chr3	-	0	CAACGGAATCCCAAAAGC	CAACGGAATCCCAAAAGC	not reported	not reported	not reported	not reported	1.30948e-05	2.39606e-05	5.48719	4.18457	15.3051	22.4251	4.27345	7.98641	3.56333	12.7639	False	False	True	False	False	False
miR-191-5p__mir-191__+1__-1__21M	hsa-mir-191	MI0000465	hsa-miR-191-5p	MIMAT0000440	1	-1	49020673	49020693	chr3	-	0	AACGGAATCCCAAAAGCAGCT	AACGGAATCCCAAAAGCAGCT	not reported	not reported	not reported	not reported	1.36098e-05	2.48536e-05	1.58935	1.25428	2.66334	3.23164	1.04332	2.06448	1.12691	2.19485	False	False	True	False	False	False
miR-24-3p__mir-24-1__-1__-1__22M	hsa-mir-24-1	MI0000080	hsa-miR-24-3p	MIMAT0000080	-1	-1	95086063	95086084	chr9	+	0	CTGGCTCAGTTCAGCAGGAACA	CTGGCTCAGTTCAGCAGGAACA	not reported	not reported	not reported	not reported	3.21722e-11	1.04418e-10	0.722508	0.525737	1.98882	2.3571	0.614075	1.66758	0.484749	1.99638	False	False	True	False	False	False
miR-485-3p__mir-485__0__0__22M	hsa-mir-485	MI0002469	hsa-miR-485-3p	MIMAT0002176	0	0	101055464	101055485	chr14	+	0	GTCATACACGGCTCTCCTCTCT	GTCATACACGGCTCTCCTCTCT	not reported	not reported	not reported	not reported	0.0244948	0.0314787	2.5321	0.812785	3.05839	1.56883	0.916566	1.39731	0.734458	1.16145	False	False	True	False	False	False
miR-30e-5p__mir-30e__+1__-4__17M	hsa-mir-30e	MI0000749	hsa-miR-30e-5p	MIMAT0000692	1	-4	40754372	40754388	chr1	+	0	GTAAACATCCTTGACTG	GTAAACATCCTTGACTG	not reported	not reported	not reported	not reported	2.22004e-18	2.7653e-17	0.518999	0.5825	6.7602	5.78385	0.403438	3.68795	0.407457	3.44423	False	False	True	False	False	False
let-7d-5p__let-7d__0__-2__20M	hsa-let-7d	MI0000065	hsa-let-7d-5p	MIMAT0000065	0	-2	94178841	94178860	chr9	+	0	AGAGGTAGTAGGTTGCATAG	AGAGGTAGTAGGTTGCATAG	not reported	not reported	not reported	not reported	2.18193e-15	1.56818e-14	112.575	131.538	46.1135	45.8991	98.4209	34.406	113.103	36.8704	False	False	False	True	False	False
miR-24-3p__mir-24-1__+2__+1__21M	hsa-mir-24-1	MI0000080	hsa-miR-24-3p	MIMAT0000080	2	1	95086066	95086086	chr9	+	0	GCTCAGTTCAGCAGGAACAGG	GCTCAGTTCAGCAGGAACAGG	not reported	not reported	not reported	not reported	6.31662e-14	3.55021e-13	0.949646	1.0736	3.37039	3.77173	0.818198	2.67798	1.00782	3.08948	False	False	True	False	False	False
miR-451a__mir-451a__0__-2__20M	hsa-mir-451a	MI0001729	hsa-miR-451a	MIMAT0001631	0	-2	28861405	28861424	chr17	-	0	AAACCGTTACCATTACTGAG	AAACCGTTACCATTACTGAG	not reported	not reported	not reported	not reported	1.94992e-13	9.57303e-13	959.749	1317.8	109.728	129.324	430.789	62.1056	801.797	63.5115	False	False	False	True	False	False
let-7g-5p__let-7g__0__+1__23M	hsa-let-7g	MI0000433	hsa-let-7g-5p	MIMAT0000414	0	1	52268335	52268357	chr3	-	0	TGAGGTAGTAGTTTGTACAGTTT	TGAGGTAGTAGTTTGTACAGTTT	not reported	not reported	not reported	not reported	0.00075515	0.00116301	8.44208	11.7137	8.20931	11.5463	6.63874	7.1838	11.3872	10.1176	False	False	False	False	True	False
miR-378a-3p__mir-378a__+1__-1__20M	hsa-mir-378a	MI0000786	hsa-miR-378a-3p	MIMAT0000732	1	-1	149732868	149732887	chr5	+	0	CTGGACTTGGAGTCAGAAGG	CTGGACTTGGAGTCAGAAGG	not reported	not reported	not reported	not reported	1.27925e-19	1.97347e-18	59.4205	60.8465	18.5207	14.8273	46.7393	14.3933	55.7101	11.387	False	False	False	True	False	False
miR-210-3p__mir-210__0__-2__20M	hsa-mir-210	MI0000286	hsa-miR-210-3p	MIMAT0000267	0	-2	568114	568133	chr11	-	0	CTGTGCGTGTGACAGCGGCT	CTGTGCGTGTGACAGCGGCT	not reported	not reported	not reported	not reported	1.05059e-19	1.66246e-18	3.2917	1.23231	43.6682	43.732	1.43927	22.0753	0.919091	25.5276	False	False	True	False	False	False
miR-192-5p__mir-192__0__-4__17M	hsa-mir-192	MI0000234	hsa-miR-192-5p	MIMAT0000222	0	-4	64891207	64891223	chr11	-	0	CTGACCTATGAATTGAC	CTGACCTATGAATTGAC	not reported	not reported	not reported	not reported	3.02503e-06	5.87015e-06	7.46014	10.175	115.097	57.1872	4.52343	19.3898	6.63657	17.1992	False	False	True	False	False	False
miR-125a-5p__mir-125a__0__-4__20M	hsa-mir-125a	MI0000469	hsa-miR-125a-5p	MIMAT0000443	0	-4	51693268	51693287	chr19	+	0	TCCCTGAGACCCTTTAACCT	TCCCTGAGACCCTTTAACCT	not reported	not reported	not reported	not reported	4.58649e-14	2.65886e-13	62.8235	13.2377	8.41266	8.47397	24.1994	7.17084	13.0195	7.2546	False	False	False	True	False	False
miR-937-3p__mir-937__0__-1__21M	hsa-mir-937	MI0005759	hsa-miR-937-3p	MIMAT0004980	0	-1	143812972	143812992	chr8	-	0	ATCCGCGCTCTGACTCTCTGC	ATCCGCGCTCTGACTCTCTGC	not reported	not reported	not reported	not reported	2.6026e-06	5.0906e-06	0.754474	0.173921	2.55728	2.36123	0.511105	1.39775	0.145868	1.2486	False	False	True	False	False	False
miR-199b-5p__mir-199b__0__-1__22M	hsa-mir-199b	MI0000282	hsa-miR-199b-5p	MIMAT0000263	0	-1	128244784	128244805	chr9	-	0	CCCAGTGTTTAGACTATCTGTT	CCCAGTGTTTAGACTATCTGTT	not reported	not reported	not reported	not reported	0.00130594	0.0019621	18.1204	25.0857	29.0656	34.5462	12.7639	23.6159	23.3136	28.1294	False	False	True	False	False	False
miR-576-5p__mir-576__0__0__22M	hsa-mir-576	MI0003583	hsa-miR-576-5p	MIMAT0003241	0	0	109488713	109488734	chr4	+	0	ATTCTAATTTCTCCACGTCTTT	ATTCTAATTTCTCCACGTCTTT	not reported	not reported	not reported	not reported	1.94864e-07	4.204e-07	1.47776	2.19501	3.24701	4.20301	1.31297	2.6414	2.12382	3.21861	False	False	True	False	False	False
miR-574-5p__mir-574__0__-4__19M	hsa-mir-574	MI0003581	hsa-miR-574-5p	MIMAT0004795	0	-4	38868056	38868074	chr4	+	0	TGAGTGTGTGTGTGTGAGT	TGAGTGTGTGTGTGTGAGT	not reported	not reported	not reported	not reported	6.37685e-07	1.30692e-06	1.22493	0.702189	3.59946	3.60767	0.953618	2.35961	0.670237	2.54365	False	False	True	False	False	False
miR-340-5p__mir-340__0__-2__20M	hsa-mir-340	MI0000802	hsa-miR-340-5p	MIMAT0004692	0	-2	180015363	180015382	chr5	-	0	TTATAAAGCAATGAGACTGA	TTATAAAGCAATGAGACTGA	not reported	not reported	not reported	not reported	3.27207e-08	7.65975e-08	3.89769	4.95407	1.3802	1.48765	2.85249	1.0661	4.18735	1.15803	False	False	False	True	False	False
miR-200c-3p__mir-200c__0__+1__24M	hsa-mir-200c	MI0000650	hsa-miR-200c-3p	MIMAT0000617	0	1	6963742	6963765	chr12	+	0	TAATACTGCCGGGTAATGATGGAG	TAATACTGCCGGGTAATGATGGAG	not reported	not reported	not reported	not reported	7.70268e-11	2.38654e-10	2.33889	1.23564	6.69692	7.04279	1.68511	4.7676	1.14555	5.15211	False	False	True	False	False	False
miR-23a-3p__mir-23a__-1__-1__21M	hsa-mir-23a	MI0000079	hsa-miR-23a-3p	MIMAT0000078	-1	-1	13836596	13836616	chr19	-	0	AATCACATTGCCAGGGATTTC	AATCACATTGCCAGGGATTTC	not reported	not reported	not reported	not reported	1.21164e-06	2.4274e-06	1.03295	1.56968	2.11917	2.18972	0.893458	1.85166	1.50706	1.94467	False	False	True	False	False	False
miR-1307-3p__mir-1307__+1__-2__19M	hsa-mir-1307	MI0006444	hsa-miR-1307-3p	MIMAT0005951	1	-2	103394303	103394321	chr10	-	0	CTCGGCGTGGCGTCGGTCG	CTCGGCGTGGCGTCGGTCG	not reported	not reported	not reported	not reported	6.44914e-09	1.61426e-08	7.88418	1.58735	10.0662	10.8957	2.92246	7.19652	1.46385	7.73661	False	False	True	False	False	False
miR-200a-5p__mir-200a__0__-6__16M	hsa-mir-200a	MI0000737	hsa-miR-200a-5p	MIMAT0001620	0	-6	1167878	1167893	chr1	+	0	CATCTTACCGGACAGT	CATCTTACCGGACAGT	not reported	not reported	not reported	not reported	5.63752e-08	1.29263e-07	3.61137	1.55623	7.90816	4.89951	1.88608	4.39748	1.45648	3.80407	False	False	True	False	False	False
miR-425-5p__mir-425__+2__0__21M	hsa-mir-425	MI0001448	hsa-miR-425-5p	MIMAT0003393	2	0	49020199	49020219	chr3	-	0	TGACACGATCACTCCCGTTGA	TGACACGATCACTCCCGTTGA	not reported	not reported	not reported	not reported	1.30372e-07	2.85439e-07	0.969459	1.50792	2.47499	1.81697	0.736592	1.77823	1.26857	1.03701	False	False	False	False	True	False
miR-92a-3p__mir-92a-1__0__-2__20M	hsa-mir-92a-1	MI0000093	hsa-miR-92a-3p	MIMAT0000092	0	-2	91351361	91351380	chr13	+	0	TATTGCACTTGTCCCGGCCT	TATTGCACTTGTCCCGGCCT	not reported	not reported	not reported	not reported	0.000103062	0.000174468	587.421	41.4555	69.1126	56.5326	70.4514	58.5046	38.7002	48.6032	False	False	False	False	False	True
miR-320a-3p__mir-320a__+2__0__20M	hsa-mir-320a	MI0000542	hsa-miR-320a-3p	MIMAT0000510	2	0	22244975	22244994	chr8	-	0	AAGCTGGGTTGAGAGGGCGA	AAGCTGGGTTGAGAGGGCGA	not reported	not reported	not reported	not reported	0.00127286	0.00191474	1.36815	0.994975	2.33908	2.0424	1.02453	1.74245	0.960016	1.59957	False	False	True	False	False	False
miR-423-5p__mir-423__0__0__23M	hsa-mir-423	MI0001445	hsa-miR-423-5p	MIMAT0004748	0	0	30117095	30117117	chr17	+	0	TGAGGGGCAGAGAGCGAGACTTT	TGAGGGGCAGAGAGCGAGACTTT	not reported	not reported	not reported	not reported	6.13656e-14	3.46486e-13	91.8484	38.1524	23.0775	22.9207	53.7979	19.6299	37.4716	20.5649	False	False	False	True	False	False
miR-182-5p__mir-182__+1__-1__22M	hsa-mir-182	MI0000272	hsa-miR-182-5p	MIMAT0000259	1	-1	129770448	129770469	chr7	-	0	TTGGCAATGGTAGAACTCACAC	TTGGCAATGGTAGAACTCACAC	not reported	not reported	not reported	not reported	3.47759e-19	4.87524e-18	0.15222	0.249729	2.13069	2.0909	0.131486	1.5367	0.23308	1.6533	False	False	True	False	False	False
miR-99b-5p__mir-99b__+1__-2__19M	hsa-mir-99b	MI0000746	hsa-miR-99b-5p	MIMAT0000689	1	-2	51692619	51692637	chr19	+	0	ACCCGTAGAACCGACCTTG	ACCCGTAGAACCGACCTTG	not reported	not reported	not reported	not reported	0.0254322	0.0325925	3.46073	2.68161	4.11817	3.34989	2.98204	3.14429	2.38299	2.31751	False	False	False	False	True	False
miR-378c__mir-378c__0__-6__19M	hsa-mir-378c	MI0015825	hsa-miR-378c	MIMAT0016847	0	-6	130962640	130962658	chr10	-	0	ACTGGACTTGGAGTCAGAA	ACTGGACTTGGAGTCAGAA	not reported	not reported	not reported	not reported	1.65467e-09	4.4017e-09	6.91889	8.0369	3.52908	2.85159	5.73725	2.82599	6.43222	2.40942	False	False	False	True	False	False
miR-505-5p__mir-505__0__0__22M	hsa-mir-505	MI0003190	hsa-miR-505-5p	MIMAT0004776	0	0	139924196	139924217	chrX	-	0	GGGAGCCAGGAAGTATTGATGT	GGGAGCCAGGAAGTATTGATGT	not reported	not reported	not reported	not reported	0.000182921	0.000300146	1.56225	0.43128	1.50328	1.53235	0.90878	1.27211	0.382021	1.29333	False	False	True	False	False	False
miR-200c-3p__mir-200c__-1__-5__19M	hsa-mir-200c	MI0000650	hsa-miR-200c-3p	MIMAT0000617	-1	-5	6963741	6963759	chr12	+	0	CTAATACTGCCGGGTAATG	CTAATACTGCCGGGTAATG	not reported	not reported	not reported	not reported	5.11478e-08	1.17864e-07	0.664396	0.34365	2.05682	1.83742	0.532549	1.51423	0.308667	1.23842	False	False	True	False	False	False
miR-96-5p__mir-96__0__0__23M	hsa-mir-96	MI0000098	hsa-miR-96-5p	MIMAT0000095	0	0	129774739	129774761	chr7	-	0	TTTGGCACTAGCACATTTTTGCT	TTTGGCACTAGCACATTTTTGCT	not reported	not reported	not reported	not reported	6.89481e-24	4.91684e-22	1.49531	1.39447	10.7822	15.4747	1.2153	7.88021	1.30846	11.7246	False	False	True	False	False	False
let-7c-5p__let-7c__0__-1__21M	hsa-let-7c	MI0000064	hsa-let-7c-5p	MIMAT0000064	0	-1	16539838	16539858	chr21	+	0	TGAGGTAGTAGGTTGTATGGT	TGAGGTAGTAGGTTGTATGGT	not reported	not reported	not reported	not reported	2.88282e-22	9.1629e-21	673.905	620.369	180.91	170.509	618.504	132.641	609.893	126.56	False	False	False	True	False	False
let-7i-5p__let-7i__+3__0__19M	hsa-let-7i	MI0000434	hsa-let-7i-5p	MIMAT0000415	3	0	62603694	62603712	chr12	+	0	GGTAGTAGTTTGTGCTGTT	GGTAGTAGTTTGTGCTGTT	not reported	not reported	not reported	not reported	0.00011445	0.000192508	3.65198	3.69628	3.33017	2.33371	3.12886	2.20287	3.20674	1.38517	False	False	False	True	False	False
miR-374b-5p__mir-374b__0__+1__23M	hsa-mir-374b	MI0005566	hsa-miR-374b-5p	MIMAT0004955	0	1	74218586	74218608	chrX	-	0	ATATAATACAACCTGCTAAGTGT	ATATAATACAACCTGCTAAGTGT	not reported	not reported	not reported	not reported	0.0104393	0.0140884	2.16988	2.67748	2.54549	3.5986	1.67875	2.10414	2.53656	2.96712	True	False	False	False	False	False
miR-320a-3p__mir-320a__-1__-1__22M	hsa-mir-320a	MI0000542	hsa-miR-320a-3p	MIMAT0000510	-1	-1	22244976	22244997	chr8	-	0	GAAAAGCTGGGTTGAGAGGGCG	GAAAAGCTGGGTTGAGAGGGCG	not reported	not reported	not reported	not reported	2.63802e-13	1.25664e-12	4.46086	3.0034	1.7269	1.41056	3.88016	1.46104	2.82339	1.25493	False	False	False	True	False	False
miR-338-3p__mir-338__-1__0__23M	hsa-mir-338	MI0000814	hsa-miR-338-3p	MIMAT0000763	-1	0	81125887	81125909	chr17	-	0	CTCCAGCATCAGTGATTTTGTTG	CTCCAGCATCAGTGATTTTGTTG	not reported	not reported	not reported	not reported	0.0348203	0.0440723	1.50825	2.32853	1.62115	0.911997	1.2023	1.06853	2.02749	0.73664	False	False	False	True	False	False
miR-769-5p__mir-769__0__0__22M	hsa-mir-769	MI0003834	hsa-miR-769-5p	MIMAT0003886	0	0	46018961	46018982	chr19	+	0	TGAGACCTCTGGGTTCTGAGCT	TGAGACCTCTGGGTTCTGAGCT	not reported	not reported	not reported	not reported	3.80357e-06	7.32311e-06	2.75975	3.83547	4.87215	5.39248	2.4448	4.19182	3.40083	4.6046	False	False	True	False	False	False
miR-21-5p__mir-21__+5__+2__19M	hsa-mir-21	MI0000077	hsa-miR-21-5p	MIMAT0000076	5	2	59841278	59841296	chr17	+	0	TATCAGACTGATGTTGACT	TATCAGACTGATGTTGACT	not reported	not reported	not reported	not reported	6.93452e-24	4.91684e-22	0.0989371	0	22.9877	16.7451	0.0740604	7.23376	0	7.53808	False	False	True	False	False	False
miR-10a-5p__mir-10a__0__-3__20M	hsa-mir-10a	MI0000266	hsa-miR-10a-5p	MIMAT0000253	0	-3	48579907	48579926	chr17	-	0	TACCCTGTAGATCCGAATTT	TACCCTGTAGATCCGAATTT	not reported	not reported	not reported	not reported	2.57774e-07	5.4969e-07	393.665	330.777	291.275	216.692	331.144	196.172	321.326	157.927	False	False	False	True	False	False
miR-143-3p__mir-143__+4__0__17M	hsa-mir-143	MI0000459	hsa-miR-143-3p	MIMAT0000435	4	0	149428982	149428998	chr5	+	0	ATGAAGCACTGTAGCTC	ATGAAGCACTGTAGCTC	not reported	not reported	not reported	not reported	1.17662e-14	7.49254e-14	83.6993	69.5217	12.4136	8.32182	38.0703	4.89758	51.3497	2.74672	False	False	False	True	False	False
miR-30a-5p__mir-30a__+1__-1__20M	hsa-mir-30a	MI0000088	hsa-miR-30a-5p	MIMAT0000087	1	-1	71403596	71403615	chr6	-	0	GTAAACATCCTCGACTGGAA	GTAAACATCCTCGACTGGAA	not reported	not reported	not reported	not reported	3.80993e-16	3.13554e-15	8.37913	8.91031	2.44589	1.47204	6.7741	1.58547	7.7574	1.12137	False	False	False	True	False	False
miR-135b-5p__mir-135b__0__0__23M	hsa-mir-135b	MI0000810	hsa-miR-135b-5p	MIMAT0000758	0	0	205448361	205448383	chr1	-	0	TATGGCTTTTCATTCCTATGTGA	TATGGCTTTTCATTCCTATGTGA	not reported	not reported	not reported	not reported	2.31347e-18	2.86234e-17	1.60953	1.65666	12.652	13.9256	1.24354	8.62164	1.58767	7.80595	False	False	True	False	False	False
miR-654-3p__mir-654__0__-1__21M	hsa-mir-654	MI0003676	hsa-miR-654-3p	MIMAT0004814	0	-1	101040269	101040289	chr14	+	0	TATGTCTGCTGACCATCACCT	TATGTCTGCTGACCATCACCT	not reported	not reported	not reported	not reported	0.00515971	0.00725825	6.2541	4.6907	5.33505	3.32262	4.70755	3.25108	3.99361	2.70944	False	False	False	True	False	False
miR-143-5p__mir-143__0__-1__21M	hsa-mir-143	MI0000459	hsa-miR-143-5p	MIMAT0004599	0	-1	149428944	149428964	chr5	+	0	GGTGCAGTGCTGCATCTCTGG	GGTGCAGTGCTGCATCTCTGG	not reported	not reported	not reported	not reported	2.89095e-18	3.47197e-17	7.7025	7.39092	46.7825	40.8322	6.93912	30.4323	7.08427	31.1635	False	False	True	False	False	False
miR-182-5p__mir-182__+7__+1__18M	hsa-mir-182	MI0000272	hsa-miR-182-5p	MIMAT0000259	7	1	129770446	129770463	chr7	-	0	ATGGTAGAACTCACACTG	ATGGTAGAACTCACACTG	not reported	not reported	not reported	not reported	6.3348e-11	1.98778e-10	0.272615	0.145567	2.20323	1.70922	0.191195	1.33471	0.126933	1.08061	False	False	True	False	False	False
miR-196b-5p__mir-196b__0__-1__21M	hsa-mir-196b	MI0001150	hsa-miR-196b-5p	MIMAT0001080	0	-1	27169529	27169549	chr7	-	0	TAGGTAGTTTCCTGTTGTTGG	TAGGTAGTTTCCTGTTGTTGG	not reported	not reported	not reported	not reported	1.03732e-07	2.30397e-07	7.67539	3.98846	93.7099	73.7922	3.80584	17.474	3.67786	15.4305	False	False	True	False	False	False
miR-136-5p__mir-136__0__-1__22M	hsa-mir-136	MI0000475	hsa-miR-136-5p	MIMAT0000448	0	-1	100884716	100884737	chr14	+	0	ACTCCATTTGTTTTGATGATGG	ACTCCATTTGTTTTGATGATGG	not reported	not reported	not reported	not reported	2.96534e-09	7.65631e-09	1.50083	1.69008	6.9532	4.80406	1.23799	3.76719	1.4862	3.79632	False	False	True	False	False	False
miR-26b-5p__mir-26b__0__0__21M	hsa-mir-26b	MI0000084	hsa-miR-26b-5p	MIMAT0000083	0	0	218402657	218402677	chr2	+	0	TTCAAGTAATTCAGGATAGGT	TTCAAGTAATTCAGGATAGGT	not reported	not reported	not reported	not reported	6.572e-06	1.23501e-05	158.026	169.431	108.481	130.4	103.985	93.5523	158.145	111.356	False	False	False	True	False	False
let-7b-5p__let-7b__0__-4__18M	hsa-let-7b	MI0000063	hsa-let-7b-5p	MIMAT0000063	0	-4	46113691	46113708	chr22	+	0	TGAGGTAGTAGGTTGTGT	TGAGGTAGTAGGTTGTGT	not reported	not reported	not reported	not reported	2.51054e-15	1.7904e-14	185.935	172.067	85.0145	106.944	164.151	58.6553	162.732	52.8359	False	False	False	True	False	False
miR-30e-5p__mir-30e__0__-1__21M	hsa-mir-30e	MI0000749	hsa-miR-30e-5p	MIMAT0000692	0	-1	40754371	40754391	chr1	+	0	TGTAAACATCCTTGACTGGAA	TGTAAACATCCTTGACTGGAA	not reported	not reported	not reported	not reported	3.42611e-07	7.19775e-07	106.175	154.295	224.614	229.819	63.6579	181.801	152.615	204.117	False	False	True	False	False	False
miR-660-5p__mir-660__0__-5__17M	hsa-mir-660	MI0003684	hsa-miR-660-5p	MIMAT0003338	0	-5	50013256	50013272	chrX	+	0	TACCCATTGCATATCGG	TACCCATTGCATATCGG	not reported	not reported	not reported	not reported	1.32218e-08	3.2284e-08	1.4156	2.42258	4.58679	6.75251	1.08252	3.28784	1.85968	4.39451	False	False	True	False	False	False
miR-758-3p__mir-758__0__0__22M	hsa-mir-758	MI0003757	hsa-miR-758-3p	MIMAT0003879	0	0	101026071	101026092	chr14	+	0	TTTGTGACCTGGTCCACTAACC	TTTGTGACCTGGTCCACTAACC	not reported	not reported	not reported	not reported	0.0004247	0.00067147	0.998607	0.969142	3.17512	2.07869	0.893026	1.86023	0.87222	1.72418	False	False	True	False	False	False
miR-4661-5p__mir-4661__0__-1__21M	hsa-mir-4661	MI0017289	hsa-miR-4661-5p	MIMAT0019729	0	-1	91205494	91205514	chr8	+	0	AACTAGCTCTGTGGATCCTGA	AACTAGCTCTGTGGATCCTGA	not reported	not reported	not reported	not reported	0.000539485	0.00084462	0.98346	0.449565	1.76085	1.65434	0.821027	1.34525	0.404418	1.13011	False	False	True	False	False	False
miR-22-3p__mir-22__+2__-1__19M	hsa-mir-22	MI0000078	hsa-miR-22-3p	MIMAT0000077	2	-1	1713915	1713933	chr17	-	0	GCTGCCAGTTGAAGAACTG	GCTGCCAGTTGAAGAACTG	not reported	not reported	not reported	not reported	3.77992e-11	1.21717e-10	1.23004	1.4779	8.26644	4.03153	0.958026	3.70253	1.31274	1.92301	False	False	True	False	False	False
miR-7-1-3p__mir-7-1__0__0__22M	hsa-mir-7-1	MI0000263	hsa-miR-7-1-3p	MIMAT0004553	0	0	83969771	83969792	chr9	-	0	CAACAAATCACAGTCTGCCATA	CAACAAATCACAGTCTGCCATA	not reported	not reported	not reported	not reported	2.15159e-23	1.12749e-21	1.94843	2.91316	10.5679	9.37263	1.68014	8.79912	2.88287	8.14482	False	False	True	False	False	False
miR-142-3p__mir-142__+2__-1__20M	hsa-mir-142	MI0000458	hsa-miR-142-3p	MIMAT0000434	2	-1	58331246	58331265	chr17	-	0	TAGTGTTTCCTACTTTATGG	TAGTGTTTCCTACTTTATGG	not reported	not reported	not reported	not reported	0.00176703	0.00261648	1.96243	2.96874	1.34071	1.37434	1.50749	1.09835	2.8365	1.17132	False	False	False	True	False	False
let-7a-5p__let-7a-1__+3__0__19M	hsa-let-7a-1	MI0000060	hsa-let-7a-5p	MIMAT0000062	3	0	94175965	94175983	chr9	+	0	GGTAGTAGGTTGTATAGTT	GGTAGTAGGTTGTATAGTT	not reported	not reported	not reported	not reported	0.00342862	0.00492263	21.7723	9.64576	12.8189	11.0661	13.7491	9.32247	8.08441	6.70229	False	True	False	False	False	False
miR-98-5p__mir-98__0__0__22M	hsa-mir-98	MI0000100	hsa-miR-98-5p	MIMAT0000096	0	0	53556299	53556320	chrX	-	0	TGAGGTAGTAAGTTGTATTGTT	TGAGGTAGTAAGTTGTATTGTT	not reported	not reported	not reported	not reported	0.000299518	0.000480558	20.5249	30.3688	16.4458	17.5144	12.8783	13.5927	29.2462	14.4161	False	False	False	False	True	False
miR-542-3p__mir-542__0__-1__21M	hsa-mir-542	MI0003686	hsa-miR-542-3p	MIMAT0003389	0	-1	134541365	134541385	chrX	-	0	TGTGACAGATTGATAACTGAA	TGTGACAGATTGATAACTGAA	not reported	not reported	not reported	not reported	0.000664074	0.00102832	17.3822	26.7769	34.3659	39.6556	11.3749	25.0592	23.2539	28.6998	False	False	True	False	False	False
miR-100-5p__mir-100__0__-4__18M	hsa-mir-100	MI0000102	hsa-miR-100-5p	MIMAT0000098	0	-4	122152279	122152296	chr11	-	0	AACCCGTAGATCCGAACT	AACCCGTAGATCCGAACT	not reported	not reported	not reported	not reported	0.00701147	0.00967489	29.2238	30.1817	38.0871	36.1639	20.6383	16.4563	28.47	14.4026	False	False	False	True	False	False
miR-24-2-5p__mir-24-2__-1__+1__24M	hsa-mir-24-2	MI0000081	hsa-miR-24-2-5p	MIMAT0004497	-1	1	13836325	13836348	chr19	-	0	GTGCCTACTGAGCTGAAACACAGT	GTGCCTACTGAGCTGAAACACAGT	not reported	not reported	not reported	not reported	1.8056e-07	3.90912e-07	0.844774	1.43028	2.35549	2.80311	0.682892	1.86573	1.21038	2.1771	False	False	True	False	False	False
miR-16-5p__mir-16-1__+5__+1__18M	hsa-mir-16-1	MI0000070	hsa-miR-16-5p	MIMAT0000069	5	1	50049026	50049043	chr13	-	0	GCACGTAAATATTGGCGT	GCACGTAAATATTGGCGT	not reported	not reported	not reported	not reported	2.43543e-10	7.13785e-10	0.243639	0.285457	2.36261	1.749	0.206458	1.30101	0.266093	1.16579	False	False	True	False	False	False
miR-145-3p__mir-145__+2__+1__21M	hsa-mir-145	MI0000461	hsa-miR-145-3p	MIMAT0004601	2	1	149430701	149430721	chr5	+	0	ATTCCTGGAAATACTGTTCTT	ATTCCTGGAAATACTGTTCTT	not reported	not reported	not reported	not reported	1.87484e-12	7.55467e-12	16.9301	17.8295	5.41605	6.66736	12.2765	4.47622	17.5267	5.34624	False	False	False	True	False	False
let-7i-5p__let-7i__+3__-1__18M	hsa-let-7i	MI0000434	hsa-let-7i-5p	MIMAT0000415	3	-1	62603694	62603711	chr12	+	0	GGTAGTAGTTTGTGCTGT	GGTAGTAGTTTGTGCTGT	not reported	not reported	not reported	not reported	5.96314e-06	1.12576e-05	5.51017	6.51265	3.43418	2.59527	4.02972	2.04878	4.6612	1.26505	False	False	False	True	False	False
miR-192-5p__mir-192__+1__+2__22M	hsa-mir-192	MI0000234	hsa-miR-192-5p	MIMAT0000222	1	2	64891201	64891222	chr11	-	0	TGACCTATGAATTGACAGCCAG	TGACCTATGAATTGACAGCCAG	not reported	not reported	not reported	not reported	1.10051e-06	2.20881e-06	106.123	55.5952	549.137	195.759	38.7461	120.168	51.0465	80.0796	False	False	True	False	False	False
miR-320b__mir-320b-1__0__-2__20M	hsa-mir-320b-1	MI0003776	hsa-miR-320b	MIMAT0005792	0	-2	116671787	116671806	chr1	+	0	AAAAGCTGGGTTGAGAGGGC	AAAAGCTGGGTTGAGAGGGC	not reported	not reported	not reported	not reported	0.0135703	0.0180823	8.58204	1.8443	4.35699	4.35014	3.32647	3.40121	1.61684	3.54432	False	False	True	False	False	False
miR-148a-5p__mir-148a__0__-1__21M	hsa-mir-148a	MI0000253	hsa-miR-148a-5p	MIMAT0004549	0	-1	25949961	25949981	chr7	-	0	AAAGTTCTGAGACACTCCGAC	AAAGTTCTGAGACACTCCGAC	not reported	not reported	not reported	not reported	0.00944898	0.0127988	2.00883	2.50008	3.31417	3.59568	1.66874	2.54686	1.7974	2.97657	False	False	True	False	False	False
miR-183-5p__mir-183__0__-5__17M	hsa-mir-183	MI0000273	hsa-miR-183-5p	MIMAT0000261	0	-5	129774972	129774988	chr7	-	0	TATGGCACTGGTAGAAT	TATGGCACTGGTAGAAT	not reported	not reported	not reported	not reported	9.26239e-10	2.55044e-09	3.35704	3.90134	11.0452	10.2113	1.89472	6.56833	2.36725	6.93489	False	False	True	False	False	False
miR-143-3p__mir-143__0__-1__20M	hsa-mir-143	MI0000459	hsa-miR-143-3p	MIMAT0000435	0	-1	149428978	149428997	chr5	+	0	TGAGATGAAGCACTGTAGCT	TGAGATGAAGCACTGTAGCT	not reported	not reported	not reported	not reported	3.4136e-13	1.58713e-12	308679	294918	56070.3	50076.7	168800	41888.8	282922	40296.8	False	False	False	True	False	False
miR-146b-3p__mir-146b__+1__-1__20M	hsa-mir-146b	MI0003129	hsa-miR-146b-3p	MIMAT0004766	1	-1	102436558	102436577	chr10	+	0	CCCTGTGGACTCAGTTCTGG	CCCTGTGGACTCAGTTCTGG	not reported	not reported	not reported	not reported	8.48264e-06	1.57559e-05	2.93651	1.39037	1.24134	0.946408	2.09955	1.00053	1.33233	0.793519	False	False	False	True	False	False
miR-205-5p__mir-205__0__-2__20M	hsa-mir-205	MI0000285	hsa-miR-205-5p	MIMAT0000266	0	-2	209432166	209432185	chr1	+	0	TCCTTCATTCCACCGGAGTC	TCCTTCATTCCACCGGAGTC	not reported	not reported	not reported	not reported	0.000643512	0.00100026	1.27461	0.471011	14.394	11.0432	0.813553	3.06041	0.424279	3.17652	False	False	True	False	False	False
miR-203a-3p__mir-203a__+1__-2__19M	hsa-mir-203a	MI0000283	hsa-miR-203a-3p	MIMAT0000264	1	-2	104117470	104117488	chr14	+	0	TGAAATGTTTAGGACCACT	TGAAATGTTTAGGACCACT	not reported	not reported	not reported	not reported	0.00871357	0.0118462	24.9963	21.5502	83.2147	75.9471	13.9542	32.9931	17.121	32.6377	False	False	True	False	False	False
miR-29a-3p__mir-29a__0__-2__20M	hsa-mir-29a	MI0000087	hsa-miR-29a-3p	MIMAT0000086	0	-2	130876750	130876769	chr7	-	0	TAGCACCATCTGAAATCGGT	TAGCACCATCTGAAATCGGT	not reported	not reported	not reported	not reported	0.00304152	0.00438735	1306.31	1264.4	1006.07	1138.26	1072.17	735.189	1118.06	875.675	False	False	False	True	False	False
miR-26b-5p__mir-26b__+5__+1__17M	hsa-mir-26b	MI0000084	hsa-miR-26b-5p	MIMAT0000083	5	1	218402662	218402678	chr2	+	0	GTAATTCAGGATAGGTT	GTAATTCAGGATAGGTT	not reported	not reported	not reported	not reported	6.8758e-05	0.000118352	0.595852	0.426549	5.49826	3.13819	0.504544	1.56007	0.402502	0.797997	False	False	True	False	False	False
miR-369-3p__mir-369__0__0__21M	hsa-mir-369	MI0000777	hsa-miR-369-3p	MIMAT0000721	0	0	101065641	101065661	chr14	+	0	AATAATACATGGTTGATCTTT	AATAATACATGGTTGATCTTT	not reported	not reported	not reported	not reported	0.0287742	0.0367603	2.08787	1.81961	5.79292	4.95542	1.62757	2.71146	1.73808	3.18765	False	False	True	False	False	False
miR-21-5p__mir-21__0__-1__21M	hsa-mir-21	MI0000077	hsa-miR-21-5p	MIMAT0000076	0	-1	59841273	59841293	chr17	+	0	TAGCTTATCAGACTGATGTTG	TAGCTTATCAGACTGATGTTG	not reported	not reported	not reported	not reported	1.60525e-24	1.97286e-22	12402	15788.3	54143.4	51956.7	6067.54	49753.3	15548	48232.6	False	False	True	False	False	False
miR-143-3p__mir-143__+3__-2__16M	hsa-mir-143	MI0000459	hsa-miR-143-3p	MIMAT0000435	3	-2	149428981	149428996	chr5	+	0	GATGAAGCACTGTAGC	GATGAAGCACTGTAGC	not reported	not reported	not reported	not reported	2.20941e-06	4.34922e-06	3.87406	2.26079	2.26233	0.981079	2.7225	1.14759	2.09063	0.664979	False	False	False	True	False	False
miR-142-5p__mir-142__0__0__21M	hsa-mir-142	MI0000458	hsa-miR-142-5p	MIMAT0000433	0	0	58331283	58331303	chr17	-	0	CATAAAGTAGAAAGCACTACT	CATAAAGTAGAAAGCACTACT	not reported	not reported	not reported	not reported	0.000342561	0.000546054	15.8781	20.8583	28.1158	35.5975	10.4905	22.3784	19.053	27.1174	False	False	True	False	False	False
miR-24-3p__mir-24-1__+1__0__21M	hsa-mir-24-1	MI0000080	hsa-miR-24-3p	MIMAT0000080	1	0	95086065	95086085	chr9	+	0	GGCTCAGTTCAGCAGGAACAG	GGCTCAGTTCAGCAGGAACAG	not reported	not reported	not reported	not reported	0.00250565	0.00364431	1.59784	1.51292	8.64176	4.20655	1.43192	2.74473	1.34991	2.50571	False	False	True	False	False	False
miR-1246__mir-1246__0__0__19M	hsa-mir-1246	MI0006381	hsa-miR-1246	MIMAT0005898	0	0	176601024	176601042	chr2	-	0	AATGGATTTTTGGAGCAGG	AATGGATTTTTGGAGCAGG	not reported	not reported	not reported	not reported	1.20746e-07	2.65623e-07	0.387048	1.68865	16.6274	14.1086	0.256438	2.20276	0.596675	2.55693	False	False	True	False	False	False
miR-200a-3p__mir-200a__0__+1__23M	hsa-mir-200a	MI0000737	hsa-miR-200a-3p	MIMAT0000682	0	1	1167916	1167938	chr1	+	0	TAACACTGTCTGGTAACGATGTT	TAACACTGTCTGGTAACGATGTT	not reported	not reported	not reported	not reported	2.05062e-22	6.75058e-21	17.9623	20.4565	152.731	161.876	12.4776	106.705	18.4933	122.53	False	False	True	False	False	False
miR-652-3p__mir-652__0__-2__19M	hsa-mir-652	MI0003667	hsa-miR-652-3p	MIMAT0003322	0	-2	110055389	110055407	chrX	+	0	AATGGCGCCACTAGGGTTG	AATGGCGCCACTAGGGTTG	not reported	not reported	not reported	not reported	0.00639319	0.00889498	1.5312	1.13729	1.47322	0.993441	1.14364	1.22876	0.909335	0.783521	False	False	False	False	True	False
miR-130a-3p__mir-130a__0__-1__21M	hsa-mir-130a	MI0000448	hsa-miR-130a-3p	MIMAT0000425	0	-1	57641252	57641272	chr11	+	0	CAGTGCAATGTTAAAAGGGCA	CAGTGCAATGTTAAAAGGGCA	not reported	not reported	not reported	not reported	0.00587607	0.00822516	12.7124	15.0644	11.0072	12.1396	10.7849	8.91338	13.82	10.1579	False	False	False	True	False	False
let-7a-5p__let-7a-1__0__-3__19M	hsa-let-7a-1	MI0000060	hsa-let-7a-5p	MIMAT0000062	0	-3	94175962	94175980	chr9	+	0	TGAGGTAGTAGGTTGTATA	TGAGGTAGTAGGTTGTATA	not reported	not reported	not reported	not reported	1.29951e-18	1.68707e-17	1230.82	1328.03	337.25	326.318	1012.09	256.288	1225.46	282.782	False	False	False	True	False	False
miR-144-3p__mir-144__0__-2__18M	hsa-mir-144	MI0000460	hsa-miR-144-3p	MIMAT0000436	0	-2	28861550	28861567	chr17	-	0	TACAGTATAGATGATGTA	TACAGTATAGATGATGTA	not reported	not reported	not reported	not reported	9.76998e-13	4.13095e-12	17.9745	21.4722	1.26158	1.096	7.95221	0.846054	10.6399	0.733225	False	False	False	True	False	False
miR-340-5p__mir-340__0__-1__21M	hsa-mir-340	MI0000802	hsa-miR-340-5p	MIMAT0004692	0	-1	180015362	180015382	chr5	-	0	TTATAAAGCAATGAGACTGAT	TTATAAAGCAATGAGACTGAT	not reported	not reported	not reported	not reported	1.00448e-09	2.75149e-09	11.5254	14.0845	5.24622	5.47525	8.17196	3.89659	13.4585	4.54354	False	False	False	True	False	False
miR-181a-5p__mir-181a-1__0__+2__25M	hsa-mir-181a-1	MI0000289	hsa-miR-181a-5p	MIMAT0000256	0	2	198859106	198859130	chr1	-	0	AACATTCAACGCTGTCGGTGAGTTT	AACATTCAACGCTGTCGGTGAGTTT	not reported	not reported	not reported	not reported	0.000154867	0.000256396	4.03306	2.00187	5.73083	6.64152	2.27633	3.85106	1.90299	4.78451	False	False	True	False	False	False
miR-425-3p__mir-425__-1__-2__21M	hsa-mir-425	MI0001448	hsa-miR-425-3p	MIMAT0001343	-1	-2	49020161	49020181	chr3	-	0	CATCGGGAATGTCGTGTCCGC	CATCGGGAATGTCGTGTCCGC	not reported	not reported	not reported	not reported	1.80686e-08	4.35417e-08	1.81091	2.44791	3.47483	3.98778	1.62906	2.96982	2.26835	3.58773	False	False	True	False	False	False
miR-23b-3p__mir-23b__+1__-2__20M	hsa-mir-23b	MI0000439	hsa-miR-23b-3p	MIMAT0000418	1	-2	95085266	95085285	chr9	+	0	TCACATTGCCAGGGATTACC	TCACATTGCCAGGGATTACC	not reported	not reported	not reported	not reported	2.89609e-10	8.40118e-10	35.3131	29.6996	29.3121	16.1563	31.8906	20.5466	27.8999	12.2109	False	False	False	True	False	False
miR-10396b-3p__mir-10396b__-1__-1__22M	hsa-mir-10396b	MI0033426	hsa-miR-10396b-3p	MIMAT0041636	-1	-1	8436352	8436373	chr21	+	0	GGGCCCCGGGCCCTCGACCGGA	GGGCCCCGGGCCCTCGACCGGA	not reported	not reported	not reported	not reported	8.5539e-16	6.59795e-15	0.358435	0	10.2135	7.94972	0.214522	2.94885	0	4.61659	False	False	True	False	False	False
miR-126-3p__mir-126__0__-5__17M	hsa-mir-126	MI0000471	hsa-miR-126-3p	MIMAT0000445	0	-5	136670653	136670669	chr9	+	0	TCGTACCGTGAGTAATA	TCGTACCGTGAGTAATA	not reported	not reported	not reported	not reported	0.00238458	0.00348196	54.1329	76.1749	95.6463	175.987	28.749	54.9884	45.3004	89.4842	False	False	True	False	False	False
miR-17-5p__mir-17__0__-1__22M	hsa-mir-17	MI0000071	hsa-miR-17-5p	MIMAT0000070	0	-1	91350618	91350639	chr13	+	0	CAAAGTGCTTACAGTGCAGGTA	CAAAGTGCTTACAGTGCAGGTA	not reported	not reported	not reported	not reported	1.02406e-08	2.51546e-08	9.02796	14.4556	24.8891	24.9633	6.63517	17.5008	13.7169	20.4323	False	False	True	False	False	False
miR-1976__mir-1976__+1__+2__21M	hsa-mir-1976	MI0009986	hsa-miR-1976	MIMAT0009451	1	2	26554575	26554595	chr1	+	0	CTCCTGCCCTCCTTGCTGTAG	CTCCTGCCCTCCTTGCTGTAG	not reported	not reported	not reported	not reported	0.000565947	0.000883798	10.2123	4.34535	3.36535	3.16915	5.66096	2.85098	4.15627	2.76313	False	False	False	True	False	False
miR-24-3p__mir-24-1__0__-2__20M	hsa-mir-24-1	MI0000080	hsa-miR-24-3p	MIMAT0000080	0	-2	95086064	95086083	chr9	+	0	TGGCTCAGTTCAGCAGGAAC	TGGCTCAGTTCAGCAGGAAC	not reported	not reported	not reported	not reported	1.10435e-07	2.44256e-07	836.624	970.073	436.54	406.195	635.155	388.457	843.537	372.302	False	False	False	True	False	False
miR-182-5p__mir-182__+5__+2__21M	hsa-mir-182	MI0000272	hsa-miR-182-5p	MIMAT0000259	5	2	129770445	129770465	chr7	-	0	CAATGGTAGAACTCACACTGG	CAATGGTAGAACTCACACTGG	not reported	not reported	not reported	not reported	6.20369e-17	5.92564e-16	0.394415	0.238455	3.99852	4.3149	0.328409	2.45344	0.221869	1.75395	False	False	True	False	False	False
miR-106b-5p__mir-106b__0__+1__22M	hsa-mir-106b	MI0000734	hsa-miR-106b-5p	MIMAT0000680	0	1	100094042	100094063	chr7	-	0	TAAAGTGCTGACAGTGCAGATA	TAAAGTGCTGACAGTGCAGATA	not reported	not reported	not reported	not reported	0.024784	0.0318282	59.6754	84.669	81.5976	91.6749	38.7807	69.3795	78.4415	82.3339	True	False	False	False	False	False
miR-182-5p__mir-182__+5__-2__17M	hsa-mir-182	MI0000272	hsa-miR-182-5p	MIMAT0000259	5	-2	129770449	129770465	chr7	-	0	CAATGGTAGAACTCACA	CAATGGTAGAACTCACA	not reported	not reported	not reported	not reported	0.00254739	0.00370211	4.80155	5.10804	12.849	10.5961	3.50438	6.61773	3.99887	4.0335	False	False	True	False	False	False
miR-30e-3p__mir-30e__0__-5__17M	hsa-mir-30e	MI0000749	hsa-miR-30e-3p	MIMAT0000693	0	-5	40754413	40754429	chr1	+	0	CTTTCAGTCGGATGTTT	CTTTCAGTCGGATGTTT	not reported	not reported	not reported	not reported	0.0116111	0.015607	315.668	355.674	572.737	730.87	227.925	342.279	296.435	443.292	False	False	True	False	False	False
miR-15b-5p__mir-15b__0__-1__21M	hsa-mir-15b	MI0000438	hsa-miR-15b-5p	MIMAT0000417	0	-1	160404607	160404627	chr3	+	0	TAGCAGCACATCATGGTTTAC	TAGCAGCACATCATGGTTTAC	not reported	not reported	not reported	not reported	4.29135e-07	8.91392e-07	93.7259	67.8344	48.5639	51.6402	73.6938	42.4788	65.4318	45.156	False	False	False	True	False	False
miR-9-5p__mir-9-1__+1__-1__21M	hsa-mir-9-1	MI0000466	hsa-miR-9-5p	MIMAT0000441	1	-1	156420393	156420413	chr1	-	0	CTTTGGTTATCTAGCTGTATG	CTTTGGTTATCTAGCTGTATG	not reported	not reported	not reported	not reported	5.32303e-17	5.11094e-16	1.39661	0.886847	47.1373	39.3429	0.56738	7.89669	0.780798	7.94214	False	False	True	False	False	False
miR-486-5p__mir-486-1__0__0__22M	hsa-mir-486-1	MI0002470	hsa-miR-486-5p	MIMAT0002177	0	0	41660484	41660505	chr8	-	0	TCCTGTACTGAGCTGCCCCGAG	TCCTGTACTGAGCTGCCCCGAG	not reported	not reported	not reported	not reported	1.99127e-23	1.07292e-21	1119.76	856.861	73.6358	111.487	583.073	41.1885	603.437	45.4707	False	False	False	True	False	False
miR-142-5p__mir-142__-2__-6__17M	hsa-mir-142	MI0000458	hsa-miR-142-5p	MIMAT0000433	-2	-6	58331289	58331305	chr17	-	0	CCCATAAAGTAGAAAGC	CCCATAAAGTAGAAAGC	not reported	not reported	not reported	not reported	5.11318e-07	1.05615e-06	1.11533	1.09245	4.00008	5.12816	0.82426	2.29084	0.767398	3.28671	False	False	True	False	False	False
miR-151a-5p__mir-151a__0__+1__22M	hsa-mir-151a	MI0000809	hsa-miR-151a-5p	MIMAT0004697	0	1	140732622	140732643	chr8	-	0	TCGAGGAGCTCACAGTCTAGTA	TCGAGGAGCTCACAGTCTAGTA	not reported	not reported	not reported	not reported	1.51962e-18	1.95903e-17	31.0936	30.3031	66.0893	74.4102	30.2869	59.2717	29.9859	67.4099	False	False	True	False	False	False
miR-144-5p__mir-144__+1__+1__22M	hsa-mir-144	MI0000460	hsa-miR-144-5p	MIMAT0004600	1	1	28861582	28861603	chr17	-	0	GATATCATCATATACTGTAAGT	GATATCATCATATACTGTAAGT	not reported	not reported	not reported	not reported	1.99587e-10	5.90118e-10	7.41619	11.9928	1.23868	1.51918	4.43507	0.860654	7.11401	0.980069	False	False	False	True	False	False
[truncated: 1,747 more rows]
