# Supplementary material for: Disparities in Lung Cancer: miRNA Isoform Characterization in Lung Adenocarcinoma
Source: Preprints.org preprint supplement (doi:10.20944/preprints202112.0501.v1), 2021-12-31
Supplement: Supplementary file 1 [file supplementary › Table S5.xlsx]

## Sheet: Sheet1
Race	Workflow	Cancer tissue	Signature size	PValue	AUC	Signature
White	OS	Primary Solid Tumor - LUAD-TCGA	13	8.7059e-10	0.65	let-7d-3p__let-7d__+1__0__21M
						miR-101-3p__mir-101-1__-1__0__22M
						miR-10400-5p__mir-10400__-1__0__12MA6MA2M
						miR-10400-5p__mir-10400__+1__0__10MA6MA2M
						miR-136-3p__mir-136__0__0__22M
						miR-148a-3p__mir-148a__0__0__1MT20M
						miR-25-3p__mir-25__0__0__19MC2M
						miR-25-3p__mir-25__0__0__22M
						miR-25-3p__mir-25__0__0__3MC18M
						miR-29b-3p__mir-29b-1__-1__-2__22M
						miR-34a-5p__mir-34a__0__-4__18M
						miR-432-5p__mir-432__0__0__23M
						miR-542-3p__mir-542__0__-2__20M
Black or African American			5	5.18311e-05	0.784034	miR-10b-3p__mir-10b__0__0__22M
						miR-151a-3p__mir-151a__-1__0__3MG18M
						miR-181a-2-3p__mir-181a-2__-1__-2__21M
						miR-183-5p__mir-183__+1__-4__17M
						miR-584-5p__mir-584__0__-1__21M
White	RFS		10	4.11844e-05	0.758237	let-7e-5p__let-7e__0__-6__16M
						miR-1299__mir-1299__0__0__22M
						miR-1307-3p__mir-1307__+1__-3__18M
						miR-151b__mir-151b__-1__-3__16M
						miR-193a-5p__mir-193a__0__-2__20M
						miR-29a-3p__mir-29a__-1__-2__3MT17M
						miR-30e-5p__mir-30e__0__-6__16M
						miR-335-3p__mir-335__0__-1__21M
						miR-335-3p__mir-335__0__-3__19M
						miR-99b-5p__mir-99b__0__-1__3MG17M
Black or African American			1	0.00268387	0.826923	miR-374a-3p__mir-374a__-1__-1__22M
