# Supplementary figures and images for: Disparities in Lung Cancer: miRNA Isoform Characterization in Lung Adenocarcinoma
Source: Preprints.org preprint supplement (doi:10.20944/preprints202112.0501.v1), 2021-12-31

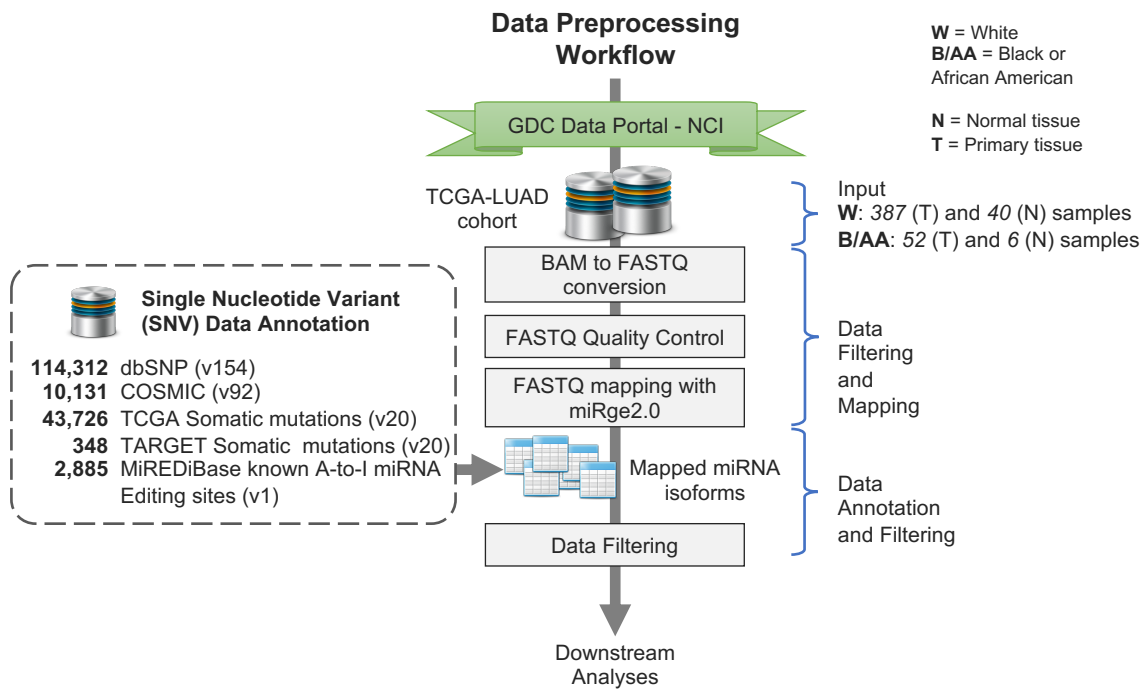

Supplement: Supplementary file 1 [file supplementary › Figure S1.pdf]

miRNA isoform nomenclature

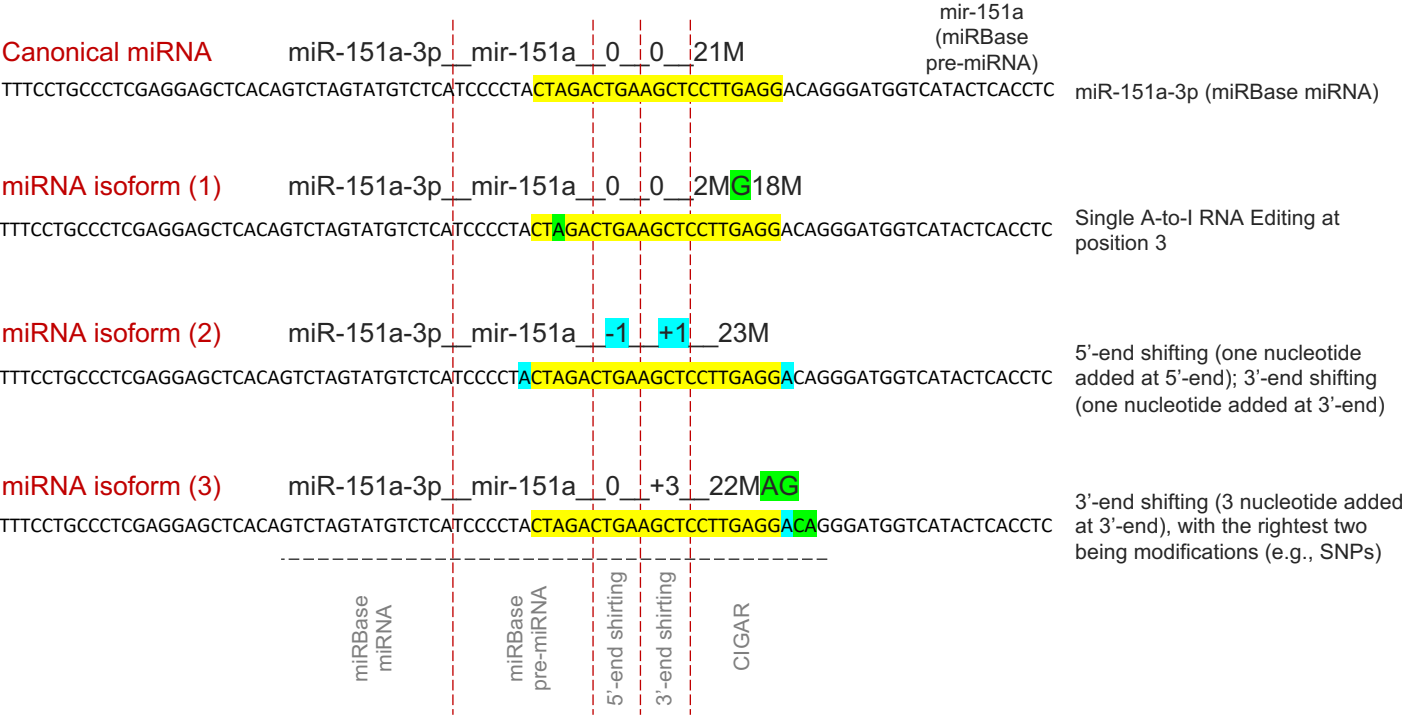

Supplement: Supplementary file 1 [file supplementary › Figure S2.pdf]

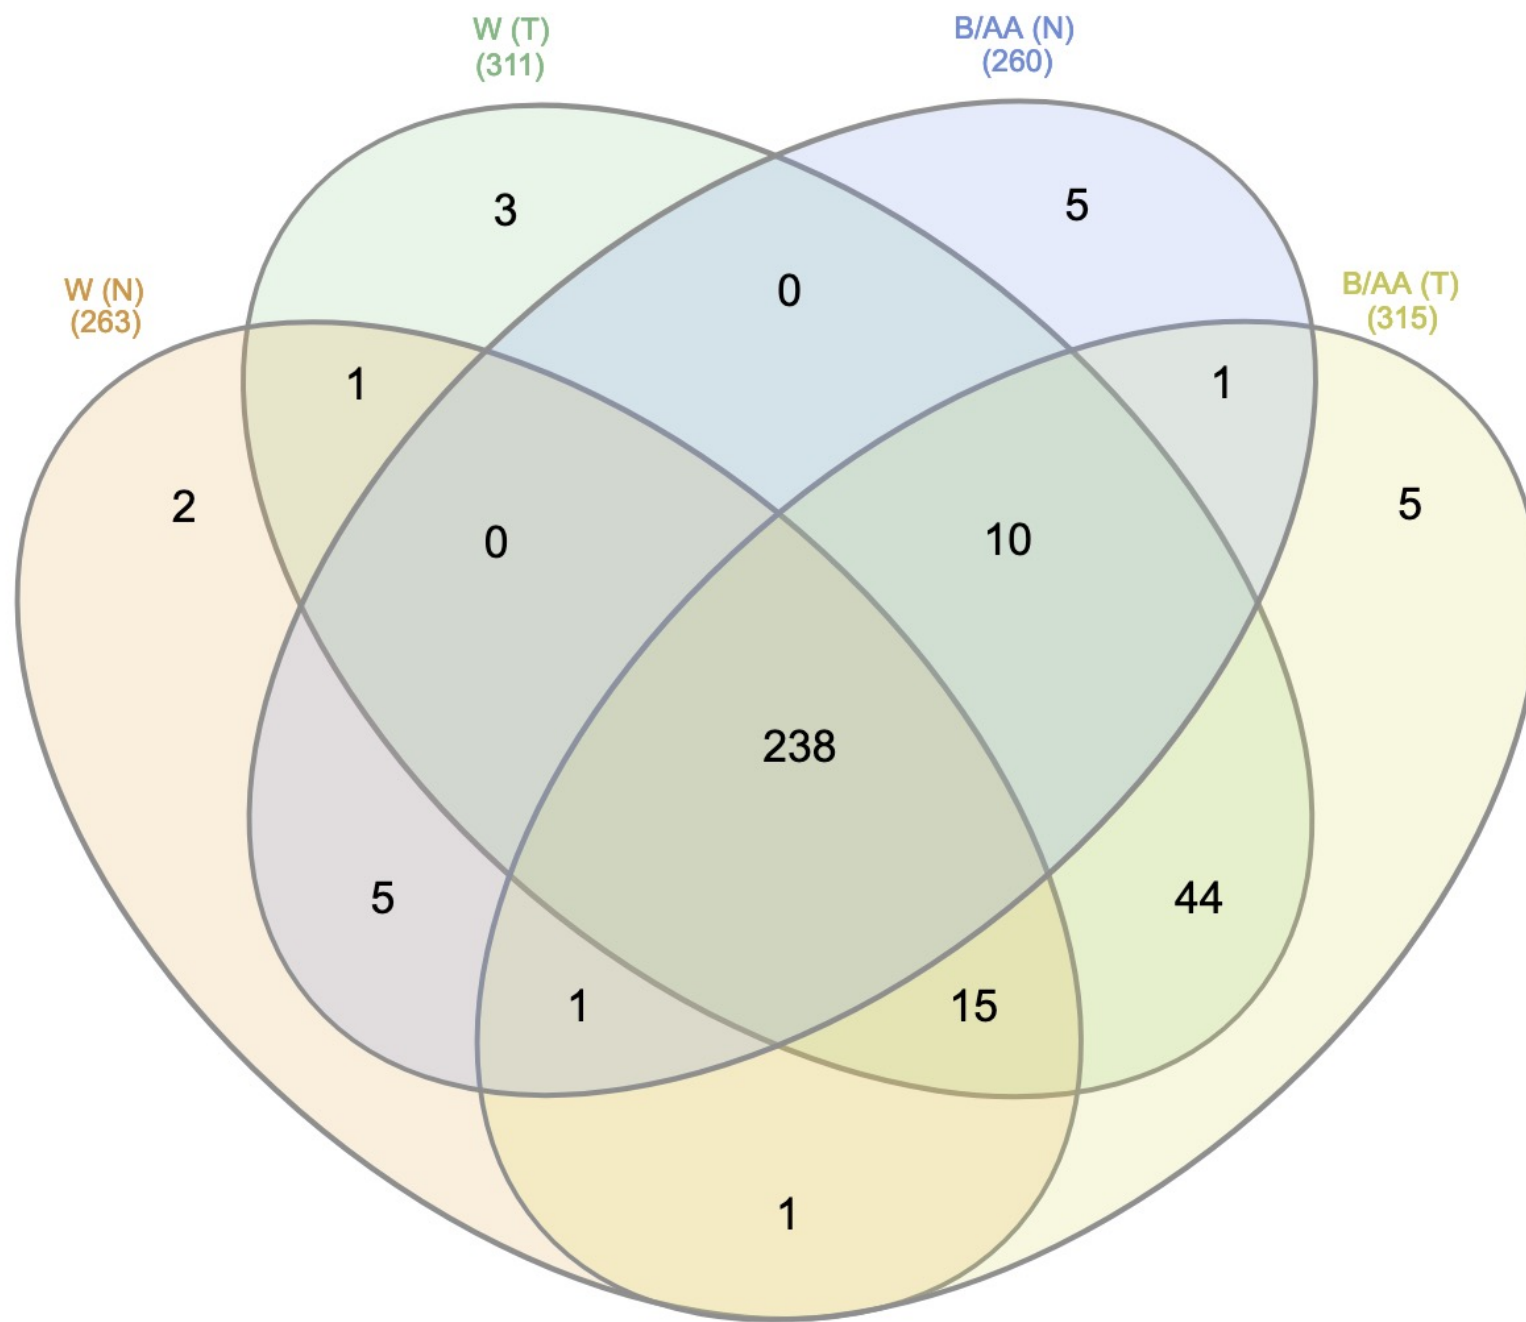

Supplement: Supplementary file 1 [file supplementary › Figure S4.pdf]

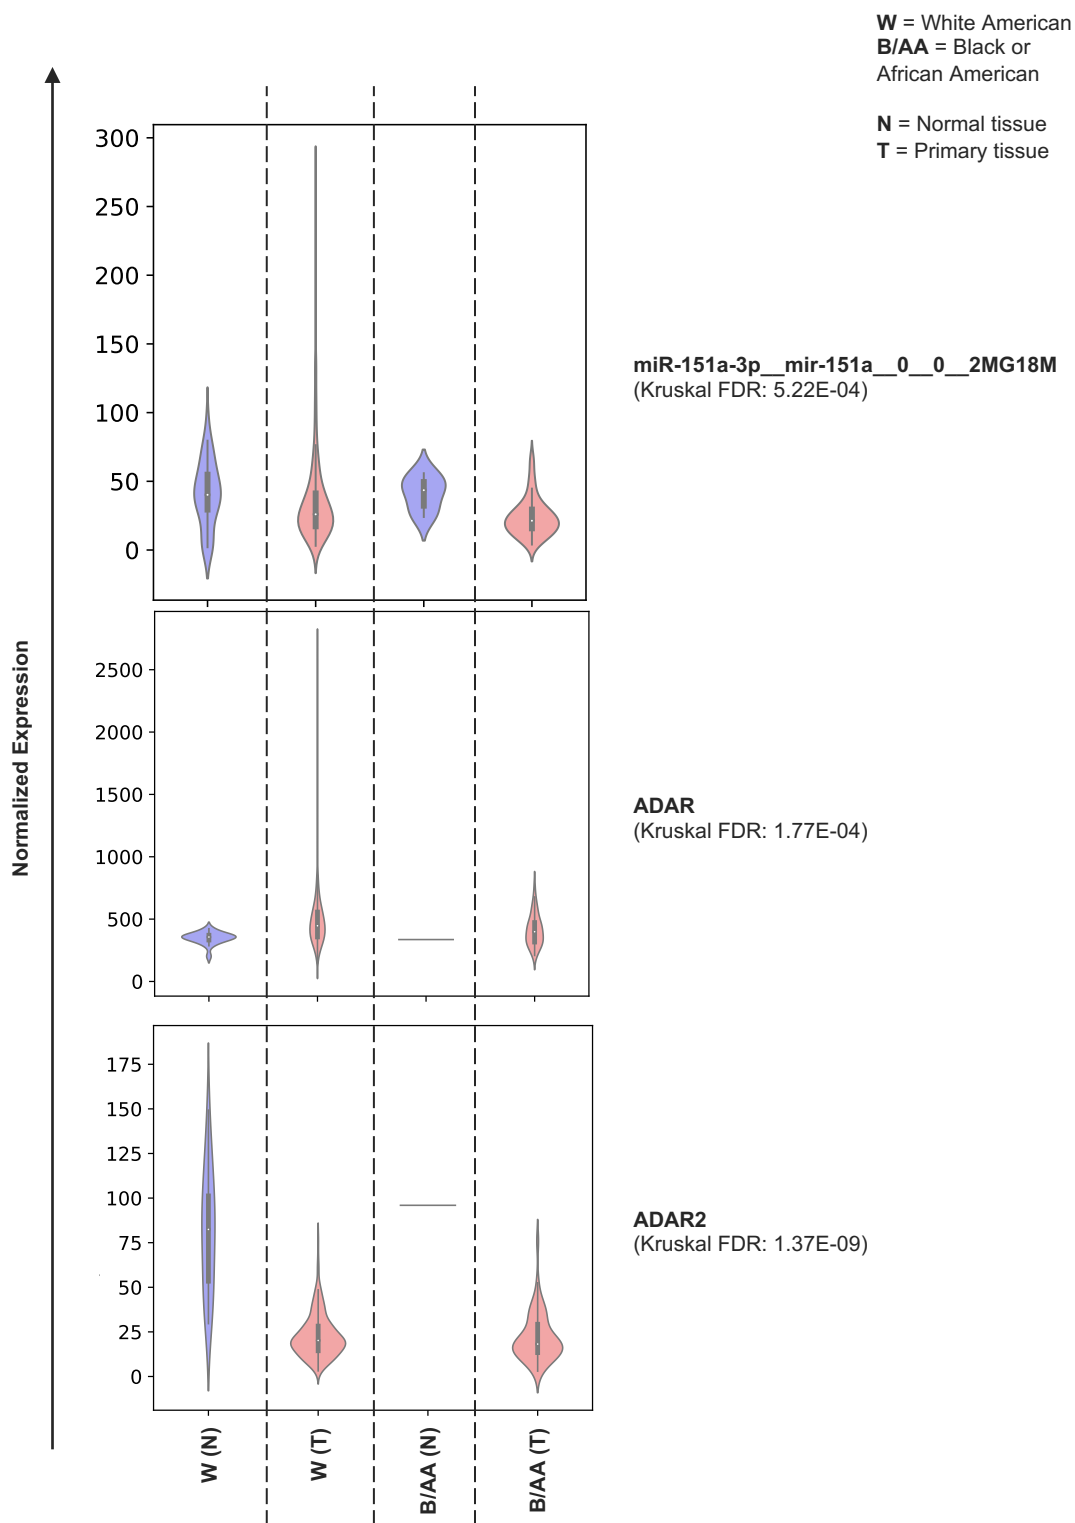

Supplement: Supplementary file 1 [file supplementary › Figure S5.pdf]
